# Supplementary material for: An In silico Approach towards Finding the Cancer-Causing Mutations in Human MET Gene
Source: Hindawi journal article supplement (doi:10.1155/2023/9705159), 2023-05-09
Supplement: f1 [file 9705159.f1.pdf]

| rsID        | Functional Consequence                                                                                                                     |
|-------------|--------------------------------------------------------------------------------------------------------------------------------------------|
| rs1621      | non_coding_transcript_variant,3_prime_UTR_variant,genic_downstream_transcript_variant                                                      |
| rs6566      | non_coding_transcript_variant,3_prime_UTR_variant,genic_downstream_transcript_variant                                                      |
| rs14456     | non_coding_transcript_variant,3_prime_UTR_variant,genic_downstream_transcript_variant                                                      |
| rs41736     | non_coding_transcript_variant,coding_sequence_variant,missense_variant,synonymous_variant,genic_downstream_transcript_variant              |
| rs41737     | genic_downstream_transcript_variant,non_coding_transcript_variant,synonymous_variant,coding_sequence_variant                               |
| rs41738     | non_coding_transcript_variant,3_prime_UTR_variant,genic_downstream_transcript_variant                                                      |
| rs41739     | non_coding_transcript_variant,3_prime_UTR_variant,genic_downstream_transcript_variant                                                      |
| rs1129355   | non_coding_transcript_variant,3_prime_UTR_variant,genic_downstream_transcript_variant                                                      |
| rs1858830   | upstream_transcript_variant,5_prime_UTR_variant,intron_variant,genic_upstream_transcript_variant                                           |
| rs2023748   | genic_downstream_transcript_variant,non_coding_transcript_variant,synonymous_variant,coding_sequence_variant                               |
| rs11762213  | synonymous_variant,coding_sequence_variant,non_coding_transcript_variant,intron_variant,genic_upstream_transcript_variant                  |
| rs12540703  | 3_prime_UTR_variant,genic_downstream_transcript_variant,non_coding_transcript_variant                                                      |
| rs13223756  | coding_sequence_variant,synonymous_variant,non_coding_transcript_variant                                                                   |
| rs17138978  | intron_variant                                                                                                                             |
| rs28444388  | genic_upstream_transcript_variant,synonymous_variant,intron_variant,non_coding_transcript_variant,coding_sequence_variant                  |
| rs33917957  | genic_upstream_transcript_variant,missense_variant,intron_variant,non_coding_transcript_variant,coding_sequence_variant                    |
| rs34349517  | genic_upstream_transcript_variant,missense_variant,intron_variant,non_coding_transcript_variant,coding_sequence_variant                    |
| rs34589476  | coding_sequence_variant,missense_variant,genic_downstream_transcript_variant,non_coding_transcript_variant                                 |
| rs35225896  | genic_upstream_transcript_variant,missense_variant,intron_variant,non_coding_transcript_variant,coding_sequence_variant                    |
| rs35284565  | genic_upstream_transcript_variant,missense_variant,synonymous_variant,intron_variant,non_coding_transcript_variant,coding_sequence_variant |
| rs35469582  | genic_upstream_transcript_variant,missense_variant,intron_variant,non_coding_transcript_variant,coding_sequence_variant                    |
| rs35601148  | genic_upstream_transcript_variant,missense_variant,intron_variant,non_coding_transcript_variant,coding_sequence_variant                    |
| rs35763409  | genic_upstream_transcript_variant,synonymous_variant,intron_variant,non_coding_transcript_variant,coding_sequence_variant                  |
| rs35775721  | genic_upstream_transcript_variant,synonymous_variant,intron_variant,non_coding_transcript_variant,coding_sequence_variant                  |
| rs35776110  | genic_upstream_transcript_variant,missense_variant,intron_variant,non_coding_transcript_variant,coding_sequence_variant                    |
| rs36080330  | intron_variant,genic_upstream_transcript_variant                                                                                           |
| rs41281081  | 3_prime_UTR_variant,genic_downstream_transcript_variant,non_coding_transcript_variant                                                      |
| rs45440991  | coding_sequence_variant,missense_variant,non_coding_transcript_variant                                                                     |
| rs45441497  | coding_sequence_variant,non_coding_transcript_variant,missense_variant,5_prime_UTR_variant                                                 |
| rs45446492  | coding_sequence_variant,missense_variant,non_coding_transcript_variant                                                                     |
| rs45460604  | coding_sequence_variant,missense_variant,non_coding_transcript_variant                                                                     |
| rs45483396  | genic_upstream_transcript_variant,missense_variant,intron_variant,non_coding_transcript_variant,coding_sequence_variant                    |
| rs45499391  | coding_sequence_variant,non_coding_transcript_variant,synonymous_variant,5_prime_UTR_variant                                               |
| rs45520237  | coding_sequence_variant,synonymous_variant,non_coding_transcript_variant                                                                   |
| rs45551737  | genic_upstream_transcript_variant,missense_variant,intron_variant,non_coding_transcript_variant,coding_sequence_variant                    |
| rs45552236  | genic_upstream_transcript_variant,synonymous_variant,intron_variant,non_coding_transcript_variant,coding_sequence_variant                  |
| rs45553236  | coding_sequence_variant,missense_variant,non_coding_transcript_variant                                                                     |
| rs45561544  | missense_variant,synonymous_variant,non_coding_transcript_variant,coding_sequence_variant,genic_downstream_transcript_variant              |
| rs45564937  | coding_sequence_variant,missense_variant,genic_downstream_transcript_variant,non_coding_transcript_variant                                 |
| rs45571634  | coding_sequence_variant,synonymous_variant,genic_downstream_transcript_variant,non_coding_transcript_variant                               |
| rs45572835  | coding_sequence_variant,synonymous_variant,non_coding_transcript_variant                                                                   |
| rs45575240  | coding_sequence_variant,missense_variant,non_coding_transcript_variant                                                                     |
| rs45575438  | coding_sequence_variant,synonymous_variant,genic_downstream_transcript_variant,non_coding_transcript_variant                               |
| rs45578433  | coding_sequence_variant,missense_variant,genic_downstream_transcript_variant,non_coding_transcript_variant                                 |
| rs45585831  | coding_sequence_variant,missense_variant,non_coding_transcript_variant                                                                     |
| rs45586239  | coding_sequence_variant,missense_variant,non_coding_transcript_variant                                                                     |
| rs45587940  | coding_sequence_variant,missense_variant,non_coding_transcript_variant                                                                     |
| rs45592846  | coding_sequence_variant,missense_variant,genic_downstream_transcript_variant,non_coding_transcript_variant                                 |
| rs45602940  | coding_sequence_variant,missense_variant,synonymous_variant,non_coding_transcript_variant                                                  |
| rs45607832  | coding_sequence_variant,missense_variant,genic_downstream_transcript_variant,non_coding_transcript_variant                                 |
| rs45612435  | coding_sequence_variant,missense_variant,genic_downstream_transcript_variant,non_coding_transcript_variant                                 |
| rs45628136  | coding_sequence_variant,missense_variant,genic_downstream_transcript_variant,non_coding_transcript_variant                                 |
| rs55755322  | coding_sequence_variant,synonymous_variant,non_coding_transcript_variant                                                                   |
| rs55985569  | genic_upstream_transcript_variant,missense_variant,synonymous_variant,intron_variant,non_coding_transcript_variant,coding_sequence_variant |
| rs56311081  | genic_upstream_transcript_variant,missense_variant,stop_gained,intron_variant,non_coding_transcript_variant,coding_sequence_variant        |
| rs56340719  | genic_upstream_transcript_variant,missense_variant,synonymous_variant,intron_variant,non_coding_transcript_variant,coding_sequence_variant |
| rs56391007  | coding_sequence_variant,missense_variant,genic_downstream_transcript_variant,non_coding_transcript_variant                                 |
| rs57349036  | intron_variant                                                                                                                             |
| rs59399612  | non_coding_transcript_variant,3_prime_UTR_variant,genic_downstream_transcript_variant                                                      |
| rs73469198  | intron_variant                                                                                                                             |
| rs73471130  | intron_variant,genic_downstream_transcript_variant                                                                                         |
| rs73471132  | intron_variant,genic_downstream_transcript_variant                                                                                         |
| rs74994656  | intron_variant                                                                                                                             |
| rs76322625  | non_coding_transcript_variant,3_prime_UTR_variant,genic_downstream_transcript_variant                                                      |
| rs76731671  | intron_variant,genic_downstream_transcript_variant,downstream_transcript_variant                                                           |
| rs77398083  | intron_variant,genic_downstream_transcript_variant                                                                                         |
| rs77523018  | non_coding_transcript_variant,intron_variant,coding_sequence_variant,missense_variant,genic_upstream_transcript_variant                    |
| rs80048442  | non_coding_transcript_variant,intron_variant,synonymous_variant,coding_sequence_variant,missense_variant,genic_upstream_transcript_variant |
| rs80153920  | non_coding_transcript_variant,intron_variant,initiator_codon_variant,missense_variant,genic_upstream_transcript_variant                    |
| rs80256822  | non_coding_transcript_variant,intron_variant,coding_sequence_variant,missense_variant,genic_upstream_transcript_variant                    |
| rs112241458 | intron_variant                                                                                                                             |
| rs115574135 | missense_variant,non_coding_transcript_variant,coding_sequence_variant                                                                     |
| rs118057172 | synonymous_variant,non_coding_transcript_variant,missense_variant,coding_sequence_variant                                                  |





|             |                                                                                                                                            |
|-------------|--------------------------------------------------------------------------------------------------------------------------------------------|
| rs375716972 | coding_sequence_variant,genic_upstream_transcript_variant,intron_variant,synonymous_variant,non_coding_transcript_variant                  |
| rs375951814 | non_coding_transcript_variant,coding_sequence_variant,missense_variant                                                                     |
| rs376069508 | genic_downstream_transcript_variant,non_coding_transcript_variant,coding_sequence_variant,synonymous_variant                               |
| rs376097698 | coding_sequence_variant,genic_upstream_transcript_variant,intron_variant,missense_variant,non_coding_transcript_variant                    |
| rs376104371 | non_coding_transcript_variant,coding_sequence_variant,missense_variant                                                                     |
| rs376183825 | genic_downstream_transcript_variant,intron_variant                                                                                         |
| rs376235685 | coding_sequence_variant,genic_upstream_transcript_variant,intron_variant,synonymous_variant,non_coding_transcript_variant                  |
| rs376243090 | genic_downstream_transcript_variant,non_coding_transcript_variant,coding_sequence_variant,missense_variant                                 |
| rs376244358 | coding_sequence_variant,genic_upstream_transcript_variant,intron_variant,missense_variant,non_coding_transcript_variant                    |
| rs376364468 | 5_prime_UTR_variant,non_coding_transcript_variant,coding_sequence_variant,missense_variant                                                 |
| rs376418811 | genic_downstream_transcript_variant,non_coding_transcript_variant,coding_sequence_variant,missense_variant                                 |
| rs376459715 | non_coding_transcript_variant,coding_sequence_variant,missense_variant                                                                     |
| rs376589619 | non_coding_transcript_variant,coding_sequence_variant,missense_variant                                                                     |
| rs376966336 | coding_sequence_variant,genic_upstream_transcript_variant,intron_variant,synonymous_variant,non_coding_transcript_variant                  |
| rs377284387 | non_coding_transcript_variant,coding_sequence_variant,synonymous_variant                                                                   |
| rs377336878 | stop_gained,non_coding_transcript_variant,coding_sequence_variant,synonymous_variant                                                       |
| rs386833405 | intron_variant                                                                                                                             |
| rs398123567 | coding_sequence_variant,genic_upstream_transcript_variant,intron_variant,synonymous_variant,non_coding_transcript_variant                  |
| rs398123568 | non_coding_transcript_variant,coding_sequence_variant,missense_variant                                                                     |
| rs398123569 | genic_downstream_transcript_variant,non_coding_transcript_variant,coding_sequence_variant,missense_variant                                 |
| rs398123570 | genic_downstream_transcript_variant,non_coding_transcript_variant,coding_sequence_variant,missense_variant                                 |
| rs527496385 | genic_downstream_transcript_variant,non_coding_transcript_variant,3_prime_UTR_variant                                                      |
| rs527638748 | intron_variant,coding_sequence_variant,missense_variant,non_coding_transcript_variant,genic_upstream_transcript_variant                    |
| rs529823741 | intron_variant                                                                                                                             |
| rs530932258 | intron_variant,coding_sequence_variant,missense_variant,non_coding_transcript_variant,genic_upstream_transcript_variant,synonymous_variant |
| rs531456758 | genic_downstream_transcript_variant,non_coding_transcript_variant,3_prime_UTR_variant                                                      |
| rs534514626 | genic_downstream_transcript_variant,non_coding_transcript_variant,3_prime_UTR_variant                                                      |
| rs534974144 | genic_downstream_transcript_variant,non_coding_transcript_variant,coding_sequence_variant,missense_variant                                 |
| rs536185931 | genic_downstream_transcript_variant,non_coding_transcript_variant,3_prime_UTR_variant                                                      |
| rs536603694 | 5_prime_UTR_variant,intron_variant,upstream_transcript_variant,genic_upstream_transcript_variant                                           |
| rs538856434 | intron_variant,genic_downstream_transcript_variant                                                                                         |
| rs539345989 | coding_sequence_variant,missense_variant,genic_downstream_transcript_variant,non_coding_transcript_variant                                 |
| rs540354779 | synonymous_variant,intron_variant,non_coding_transcript_variant,genic_upstream_transcript_variant,coding_sequence_variant                  |
| rs543293293 | intron_variant                                                                                                                             |
| rs544081614 | coding_sequence_variant,synonymous_variant,genic_downstream_transcript_variant,non_coding_transcript_variant                               |
| rs544274181 | coding_sequence_variant,missense_variant,non_coding_transcript_variant                                                                     |
| rs544545520 | coding_sequence_variant,synonymous_variant,genic_downstream_transcript_variant,non_coding_transcript_variant                               |
| rs545332056 | intron_variant,non_coding_transcript_variant,genic_upstream_transcript_variant,coding_sequence_variant,missense_variant                    |
| rs549459978 | synonymous_variant,intron_variant,non_coding_transcript_variant,coding_sequence_variant,genic_upstream_transcript_variant                  |
| rs552870344 | synonymous_variant,intron_variant,non_coding_transcript_variant,coding_sequence_variant,genic_upstream_transcript_variant                  |
| rs553431706 | intron_variant                                                                                                                             |
| rs553602374 | 3_prime_UTR_variant,genic_downstream_transcript_variant,non_coding_transcript_variant                                                      |
| rs554029534 | 3_prime_UTR_variant,genic_downstream_transcript_variant,non_coding_transcript_variant                                                      |
| rs554190225 | synonymous_variant,intron_variant,non_coding_transcript_variant,coding_sequence_variant,genic_upstream_transcript_variant                  |
| rs555099334 | genic_downstream_transcript_variant,synonymous_variant,coding_sequence_variant,non_coding_transcript_variant                               |
| rs555920594 | genic_upstream_transcript_variant,missense_variant,intron_variant,coding_sequence_variant,non_coding_transcript_variant                    |
| rs559231345 | genic_downstream_transcript_variant,3_prime_UTR_variant,non_coding_transcript_variant                                                      |
| rs560568639 | genic_downstream_transcript_variant,3_prime_UTR_variant,non_coding_transcript_variant                                                      |
| rs561131509 | coding_sequence_variant,non_coding_transcript_variant,synonymous_variant                                                                   |
| rs561295443 | genic_upstream_transcript_variant,missense_variant,intron_variant,coding_sequence_variant,non_coding_transcript_variant                    |
| rs561588772 | missense_variant,coding_sequence_variant,non_coding_transcript_variant                                                                     |
| rs563978117 | genic_downstream_transcript_variant,3_prime_UTR_variant,non_coding_transcript_variant                                                      |
| rs565768785 | genic_downstream_transcript_variant,3_prime_UTR_variant,non_coding_transcript_variant                                                      |
| rs565938550 | non_coding_transcript_variant,missense_variant,genic_downstream_transcript_variant,coding_sequence_variant                                 |
| rs566540058 | non_coding_transcript_variant,coding_sequence_variant,synonymous_variant                                                                   |
| rs567551556 | non_coding_transcript_variant,genic_downstream_transcript_variant,coding_sequence_variant,synonymous_variant                               |
| rs570036369 | synonymous_variant,non_coding_transcript_variant,genic_upstream_transcript_variant,coding_sequence_variant,intron_variant                  |
| rs573510587 | genic_downstream_transcript_variant,3_prime_UTR_variant,non_coding_transcript_variant                                                      |
| rs574911056 | non_coding_transcript_variant,intron_variant,genic_upstream_transcript_variant,synonymous_variant,coding_sequence_variant                  |
| rs575907920 | missense_variant,non_coding_transcript_variant,genic_downstream_transcript_variant,coding_sequence_variant                                 |
| rs576502224 | non_coding_transcript_variant,intron_variant,genic_upstream_transcript_variant,synonymous_variant,coding_sequence_variant                  |
| rs587777950 | intron_variant                                                                                                                             |
| rs587777951 | intron_variant                                                                                                                             |
| rs587777952 | intron_variant                                                                                                                             |
| rs587778441 | missense_variant,non_coding_transcript_variant,genic_downstream_transcript_variant,coding_sequence_variant                                 |
| rs587778442 | non_coding_transcript_variant,intron_variant,genic_upstream_transcript_variant,missense_variant,coding_sequence_variant                    |
| rs587778443 | non_coding_transcript_variant,intron_variant,genic_upstream_transcript_variant,missense_variant,coding_sequence_variant                    |
| rs587778444 | missense_variant,non_coding_transcript_variant,genic_downstream_transcript_variant,coding_sequence_variant                                 |
| rs587778445 | missense_variant,non_coding_transcript_variant,coding_sequence_variant                                                                     |
| rs587778446 | missense_variant,non_coding_transcript_variant,coding_sequence_variant                                                                     |
| rs587780532 | synonymous_variant,non_coding_transcript_variant,genic_downstream_transcript_variant,coding_sequence_variant                               |
| rs587780540 | missense_variant,intron_variant,stop_gained,coding_sequence_variant                                                                        |
| rs587780548 | non_coding_transcript_variant,intron_variant,genic_upstream_transcript_variant,missense_variant,coding_sequence_variant                    |
| rs587780733 | missense_variant,non_coding_transcript_variant,coding_sequence_variant                                                                     |









|              |                                                                                                                                            |
|--------------|--------------------------------------------------------------------------------------------------------------------------------------------|
| rs868554436  | 3_prime_UTR_variant,genic_downstream_transcript_variant,non_coding_transcript_variant                                                      |
| rs869320706  | genic_downstream_transcript_variant,coding_sequence_variant,intron_variant,non_coding_transcript_variant,splice_donor_variant              |
| rs869320707  | genic_downstream_transcript_variant,splice_donor_variant                                                                                   |
| rs879254328  | synonymous_variant,coding_sequence_variant,genic_downstream_transcript_variant,non_coding_transcript_variant                               |
| rs879254330  | genic_upstream_transcript_variant,missense_variant,coding_sequence_variant,intron_variant,non_coding_transcript_variant                    |
| rs879254331  | genic_upstream_transcript_variant,intron_variant                                                                                           |
| rs879254332  | coding_sequence_variant,missense_variant,non_coding_transcript_variant                                                                     |
| rs879254333  | coding_sequence_variant,missense_variant,non_coding_transcript_variant                                                                     |
| rs879254334  | coding_sequence_variant,intron_variant,missense_variant                                                                                    |
| rs879254335  | coding_sequence_variant,genic_downstream_transcript_variant,missense_variant,non_coding_transcript_variant                                 |
| rs879254336  | synonymous_variant,genic_downstream_transcript_variant,missense_variant,stop_gained,coding_sequence_variant,non_coding_transcript_variant  |
| rs879254337  | genic_downstream_transcript_variant,splice_acceptor_variant                                                                                |
| rs879254338  | coding_sequence_variant,genic_downstream_transcript_variant,missense_variant,non_coding_transcript_variant                                 |
| rs879254339  | genic_upstream_transcript_variant,missense_variant,coding_sequence_variant,intron_variant,non_coding_transcript_variant                    |
| rs879254340  | synonymous_variant,coding_sequence_variant,genic_downstream_transcript_variant,non_coding_transcript_variant                               |
| rs879254341  | synonymous_variant,genic_upstream_transcript_variant,missense_variant,coding_sequence_variant,intron_variant,non_coding_transcript_variant |
| rs879254342  | genic_upstream_transcript_variant,missense_variant,coding_sequence_variant,intron_variant,non_coding_transcript_variant                    |
| rs879254343  | genic_upstream_transcript_variant,missense_variant,coding_sequence_variant,intron_variant,non_coding_transcript_variant                    |
| rs886038413  | synonymous_variant,coding_sequence_variant,genic_downstream_transcript_variant,non_coding_transcript_variant                               |
| rs886042262  | coding_sequence_variant,genic_downstream_transcript_variant,missense_variant,non_coding_transcript_variant                                 |
| rs886061938  | intron_variant,genic_upstream_transcript_variant,non_coding_transcript_variant,5_prime_UTR_variant                                         |
| rs886061939  | intron_variant,genic_upstream_transcript_variant,non_coding_transcript_variant,5_prime_UTR_variant                                         |
| rs886061940  | intron_variant,genic_upstream_transcript_variant,non_coding_transcript_variant,5_prime_UTR_variant                                         |
| rs886061941  | intron_variant,genic_upstream_transcript_variant,non_coding_transcript_variant,5_prime_UTR_variant                                         |
| rs886061942  | synonymous_variant,genic_upstream_transcript_variant,coding_sequence_variant,intron_variant,non_coding_transcript_variant                  |
| rs886061943  | genic_upstream_transcript_variant,missense_variant,coding_sequence_variant,intron_variant,non_coding_transcript_variant                    |
| rs886061945  | 3_prime_UTR_variant,genic_downstream_transcript_variant,non_coding_transcript_variant                                                      |
| rs886061946  | 3_prime_UTR_variant,genic_downstream_transcript_variant,non_coding_transcript_variant                                                      |
| rs886061947  | 3_prime_UTR_variant,genic_downstream_transcript_variant,non_coding_transcript_variant                                                      |
| rs886061948  | 3_prime_UTR_variant,genic_downstream_transcript_variant,non_coding_transcript_variant                                                      |
| rs886061949  | 3_prime_UTR_variant,genic_downstream_transcript_variant,non_coding_transcript_variant                                                      |
| rs886061950  | 3_prime_UTR_variant,genic_downstream_transcript_variant,non_coding_transcript_variant                                                      |
| rs886061951  | 3_prime_UTR_variant,genic_downstream_transcript_variant,non_coding_transcript_variant                                                      |
| rs891908277  | synonymous_variant,coding_sequence_variant,non_coding_transcript_variant                                                                   |
| rs895820328  | coding_sequence_variant,non_coding_transcript_variant,missense_variant                                                                     |
| rs899151863  | coding_sequence_variant,genic_upstream_transcript_variant,non_coding_transcript_variant,missense_variant,intron_variant                    |
| rs902884572  | synonymous_variant,coding_sequence_variant,non_coding_transcript_variant                                                                   |
| rs904162290  | coding_sequence_variant,genic_upstream_transcript_variant,non_coding_transcript_variant,missense_variant,intron_variant                    |
| rs904275312  | coding_sequence_variant,genic_upstream_transcript_variant,non_coding_transcript_variant,missense_variant,intron_variant                    |
| rs905891313  | coding_sequence_variant,non_coding_transcript_variant,missense_variant                                                                     |
| rs908653562  | genic_downstream_transcript_variant,non_coding_transcript_variant,coding_sequence_variant,missense_variant                                 |
| rs910873191  | non_coding_transcript_variant,coding_sequence_variant,synonymous_variant                                                                   |
| rs910937816  | genic_downstream_transcript_variant,non_coding_transcript_variant,coding_sequence_variant,missense_variant                                 |
| rs911380470  | 5_prime_UTR_variant,coding_sequence_variant,missense_variant,non_coding_transcript_variant                                                 |
| rs912927724  | genic_downstream_transcript_variant,non_coding_transcript_variant,coding_sequence_variant,missense_variant                                 |
| rs919828654  | coding_sequence_variant,non_coding_transcript_variant,genic_upstream_transcript_variant,intron_variant,missense_variant                    |
| rs921083171  | coding_sequence_variant,non_coding_transcript_variant,genic_upstream_transcript_variant,intron_variant,missense_variant                    |
| rs922296506  | missense_variant,coding_sequence_variant,non_coding_transcript_variant,5_prime_UTR_variant                                                 |
| rs922442405  | missense_variant,coding_sequence_variant,non_coding_transcript_variant,genic_downstream_transcript_variant                                 |
| rs926365001  | synonymous_variant,coding_sequence_variant,non_coding_transcript_variant,genic_downstream_transcript_variant                               |
| rs933744184  | genic_downstream_transcript_variant,synonymous_variant,coding_sequence_variant,non_coding_transcript_variant                               |
| rs934426317  | non_coding_transcript_variant,intron_variant,coding_sequence_variant,synonymous_variant,genic_upstream_transcript_variant                  |
| rs935854365  | 3_prime_UTR_variant,genic_downstream_transcript_variant,non_coding_transcript_variant                                                      |
| rs943753621  | missense_variant,coding_sequence_variant,non_coding_transcript_variant                                                                     |
| rs950642030  | missense_variant,genic_downstream_transcript_variant,coding_sequence_variant,non_coding_transcript_variant                                 |
| rs953588907  | intron_variant                                                                                                                             |
| rs955990225  | non_coding_transcript_variant,3_prime_UTR_variant,genic_downstream_transcript_variant                                                      |
| rs958023403  | non_coding_transcript_variant,synonymous_variant,coding_sequence_variant                                                                   |
| rs965135961  | 5_prime_UTR_variant,non_coding_transcript_variant,synonymous_variant,coding_sequence_variant                                               |
| rs965319455  | missense_variant,non_coding_transcript_variant,coding_sequence_variant                                                                     |
| rs973796037  | coding_sequence_variant,non_coding_transcript_variant,genic_upstream_transcript_variant,missense_variant,intron_variant                    |
| rs974352099  | genic_downstream_transcript_variant,non_coding_transcript_variant,missense_variant,coding_sequence_variant                                 |
| rs974448652  | coding_sequence_variant,non_coding_transcript_variant,genic_upstream_transcript_variant,missense_variant,intron_variant                    |
| rs978734201  | genic_downstream_transcript_variant,coding_sequence_variant,synonymous_variant,non_coding_transcript_variant                               |
| rs980467681  | coding_sequence_variant,non_coding_transcript_variant,missense_variant                                                                     |
| rs983457211  | coding_sequence_variant,non_coding_transcript_variant,missense_variant,intron_variant,genic_upstream_transcript_variant                    |
| rs986139438  | coding_sequence_variant,non_coding_transcript_variant,5_prime_UTR_variant,missense_variant                                                 |
| rs993773653  | coding_sequence_variant,non_coding_transcript_variant,genic_downstream_transcript_variant,missense_variant                                 |
| rs1001801655 | 3_prime_UTR_variant,genic_downstream_transcript_variant,non_coding_transcript_variant                                                      |
| rs1003586623 | coding_sequence_variant,missense_variant,non_coding_transcript_variant                                                                     |
| rs1004264326 | coding_sequence_variant,missense_variant,non_coding_transcript_variant                                                                     |
| rs1012909374 | coding_sequence_variant,non_coding_transcript_variant,missense_variant                                                                     |
| rs1013431413 | splice_donor_variant                                                                                                                       |
| rs1027607387 | synonymous_variant,intron_variant,coding_sequence_variant                                                                                  |



|              |                                                                                                                           |
|--------------|---------------------------------------------------------------------------------------------------------------------------|
| rs1258671501 | non_coding_transcript_variant,missense_variant,genic_downstream_transcript_variant,coding_sequence_variant                |
| rs1260635670 | intron_variant,genic_upstream_transcript_variant,coding_sequence_variant,non_coding_transcript_variant,missense_variant   |
| rs1261418076 | non_coding_transcript_variant,missense_variant,coding_sequence_variant,genic_downstream_transcript_variant                |
| rs1262601648 | missense_variant,intron_variant,coding_sequence_variant                                                                   |
| rs1263785859 | non_coding_transcript_variant,missense_variant,coding_sequence_variant,genic_downstream_transcript_variant                |
| rs1266863567 | intron_variant,genic_upstream_transcript_variant,coding_sequence_variant,non_coding_transcript_variant,missense_variant   |
| rs1278254320 | non_coding_transcript_variant,missense_variant,genic_downstream_transcript_variant,coding_sequence_variant                |
| rs1282444375 | non_coding_transcript_variant,synonymous_variant,coding_sequence_variant                                                  |
| rs1282638781 | missense_variant,non_coding_transcript_variant,coding_sequence_variant,intron_variant,genic_upstream_transcript_variant   |
| rs1288860579 | missense_variant,genic_downstream_transcript_variant,non_coding_transcript_variant,coding_sequence_variant                |
| rs1289461217 | missense_variant,5_prime_UTR_variant,non_coding_transcript_variant,coding_sequence_variant                                |
| rs1291977283 | non_coding_transcript_variant,coding_sequence_variant,intron_variant,genic_upstream_transcript_variant,missense_variant   |
| rs1292389793 | missense_variant,genic_downstream_transcript_variant,non_coding_transcript_variant,coding_sequence_variant                |
| rs1294910019 | missense_variant,genic_downstream_transcript_variant,non_coding_transcript_variant,coding_sequence_variant                |
| rs1294994065 | non_coding_transcript_variant,coding_sequence_variant,intron_variant,genic_upstream_transcript_variant,missense_variant   |
| rs1296330997 | coding_sequence_variant,intron_variant,missense_variant,genic_upstream_transcript_variant,non_coding_transcript_variant   |
| rs1301383613 | intron_variant,genic_downstream_transcript_variant                                                                        |
| rs1305399003 | intron_variant                                                                                                            |
| rs1306040798 | coding_sequence_variant,intron_variant,missense_variant,genic_upstream_transcript_variant,non_coding_transcript_variant   |
| rs1306740707 | coding_sequence_variant,intron_variant,missense_variant,genic_upstream_transcript_variant,non_coding_transcript_variant   |
| rs1307693651 | coding_sequence_variant,non_coding_transcript_variant,missense_variant                                                    |
| rs1313347428 | missense_variant,non_coding_transcript_variant,coding_sequence_variant                                                    |
| rs1318406399 | missense_variant,non_coding_transcript_variant,coding_sequence_variant                                                    |
| rs1319458719 | missense_variant,non_coding_transcript_variant,genic_downstream_transcript_variant,coding_sequence_variant                |
| rs1320718414 | non_coding_transcript_variant,intron_variant,genic_upstream_transcript_variant,coding_sequence_variant,missense_variant   |
| rs1321841621 | 3_prime_UTR_variant,genic_downstream_transcript_variant,non_coding_transcript_variant                                     |
| rs1323787899 | genic_downstream_transcript_variant,non_coding_transcript_variant,coding_sequence_variant,synonymous_variant              |
| rs1326405747 | coding_sequence_variant,intron_variant,non_coding_transcript_variant,missense_variant,genic_upstream_transcript_variant   |
| rs1328454755 | missense_variant,non_coding_transcript_variant,coding_sequence_variant                                                    |
| rs1333930330 | non_coding_transcript_variant,genic_downstream_transcript_variant,coding_sequence_variant,missense_variant                |
| rs1336351205 | splice_acceptor_variant                                                                                                   |
| rs1337305891 | intron_variant                                                                                                            |
| rs1342295714 | non_coding_transcript_variant,synonymous_variant,coding_sequence_variant,5_prime_UTR_variant                              |
| rs1344902873 | non_coding_transcript_variant,coding_sequence_variant,missense_variant                                                    |
| rs1346572528 | non_coding_transcript_variant,missense_variant,coding_sequence_variant                                                    |
| rs1348453406 | non_coding_transcript_variant,missense_variant,genic_downstream_transcript_variant,coding_sequence_variant                |
| rs1351634349 | non_coding_transcript_variant,missense_variant,coding_sequence_variant                                                    |
| rs1354964885 | synonymous_variant,non_coding_transcript_variant,stop_gained,coding_sequence_variant                                      |
| rs1355716761 | missense_variant,intron_variant,coding_sequence_variant                                                                   |
| rs1355886011 | missense_variant,genic_upstream_transcript_variant,non_coding_transcript_variant,intron_variant,coding_sequence_variant   |
| rs1357266763 | non_coding_transcript_variant,missense_variant,genic_downstream_transcript_variant,coding_sequence_variant                |
| rs1358705636 | non_coding_transcript_variant,synonymous_variant,5_prime_UTR_variant,coding_sequence_variant                              |
| rs1360184564 | intron_variant,genic_downstream_transcript_variant                                                                        |
| rs1361155132 | non_coding_transcript_variant,coding_sequence_variant,genic_downstream_transcript_variant,missense_variant                |
| rs1362532895 | intron_variant                                                                                                            |
| rs1363905218 | synonymous_variant,intron_variant,non_coding_transcript_variant,coding_sequence_variant,genic_upstream_transcript_variant |
| rs1369230650 | synonymous_variant,intron_variant,non_coding_transcript_variant,coding_sequence_variant,genic_upstream_transcript_variant |
| rs1370688649 | splice_acceptor_variant                                                                                                   |
| rs1375872823 | coding_sequence_variant,genic_upstream_transcript_variant,missense_variant,non_coding_transcript_variant,intron_variant   |
| rs1375932394 | coding_sequence_variant,genic_upstream_transcript_variant,missense_variant,non_coding_transcript_variant,intron_variant   |
| rs1376208948 | synonymous_variant,coding_sequence_variant,non_coding_transcript_variant                                                  |
| rs1382410716 | synonymous_variant,coding_sequence_variant,non_coding_transcript_variant                                                  |
| rs1384134548 | missense_variant,coding_sequence_variant,non_coding_transcript_variant                                                    |
| rs1385709850 | coding_sequence_variant,missense_variant,non_coding_transcript_variant                                                    |
| rs1386889641 | synonymous_variant,coding_sequence_variant,genic_downstream_transcript_variant,non_coding_transcript_variant              |
| rs1390590380 | missense_variant,coding_sequence_variant,genic_downstream_transcript_variant,non_coding_transcript_variant                |
| rs1390958903 | coding_sequence_variant,missense_variant,non_coding_transcript_variant                                                    |
| rs1391853762 | coding_sequence_variant,missense_variant,non_coding_transcript_variant                                                    |
| rs1394199299 | missense_variant,coding_sequence_variant,genic_downstream_transcript_variant,non_coding_transcript_variant                |
| rs1394626435 | coding_sequence_variant,missense_variant,non_coding_transcript_variant                                                    |
| rs1395233386 | intron_variant,missense_variant,genic_upstream_transcript_variant,coding_sequence_variant,non_coding_transcript_variant   |
| rs1395763398 | missense_variant,coding_sequence_variant,genic_downstream_transcript_variant,non_coding_transcript_variant                |
| rs1395827839 | intron_variant,missense_variant,genic_upstream_transcript_variant,coding_sequence_variant,non_coding_transcript_variant   |
| rs1396083482 | intron_variant,missense_variant,genic_upstream_transcript_variant,coding_sequence_variant,non_coding_transcript_variant   |
| rs1397743069 | genic_downstream_transcript_variant,coding_sequence_variant,missense_variant,non_coding_transcript_variant                |
| rs1397775000 | missense_variant,intron_variant,coding_sequence_variant,splice_acceptor_variant                                           |
| rs1398243931 | coding_sequence_variant,missense_variant,non_coding_transcript_variant                                                    |
| rs1398543726 | genic_downstream_transcript_variant,coding_sequence_variant,missense_variant,non_coding_transcript_variant                |
| rs1398648043 | coding_sequence_variant,missense_variant,non_coding_transcript_variant                                                    |
| rs1402713307 | coding_sequence_variant,missense_variant,non_coding_transcript_variant                                                    |
| rs1404824650 | genic_downstream_transcript_variant,coding_sequence_variant,missense_variant,non_coding_transcript_variant                |
| rs1408351682 | coding_sequence_variant,missense_variant,non_coding_transcript_variant                                                    |
| rs1410705895 | missense_variant,coding_sequence_variant,intron_variant,genic_upstream_transcript_variant,non_coding_transcript_variant   |
| rs1410859976 | missense_variant,non_coding_transcript_variant,coding_sequence_variant                                                    |













|             |                                                                                                                                            |
|-------------|--------------------------------------------------------------------------------------------------------------------------------------------|
| rs2023748   | genic_downstream_transcript_variant,non_coding_transcript_variant,synonymous_variant,coding_sequence_variant                               |
| rs2023748   | genic_downstream_transcript_variant,non_coding_transcript_variant,synonymous_variant,coding_sequence_variant                               |
| rs13223756  | coding_sequence_variant,synonymous_variant,non_coding_transcript_variant                                                                   |
| rs17138978  | intron_variant                                                                                                                             |
| rs55985569  | genic_upstream_transcript_variant,missense_variant,synonymous_variant,intron_variant,non_coding_transcript_variant,coding_sequence_variant |
| rs57349036  | intron_variant                                                                                                                             |
| rs57349036  | intron_variant                                                                                                                             |
| rs57349036  | intron_variant                                                                                                                             |
| rs57349036  | intron_variant                                                                                                                             |
| rs57349036  | intron_variant                                                                                                                             |
| rs57349036  | intron_variant                                                                                                                             |
| rs57349036  | intron_variant                                                                                                                             |
| rs57349036  | intron_variant                                                                                                                             |
| rs57349036  | intron_variant                                                                                                                             |
| rs73469198  | intron_variant                                                                                                                             |
| rs73469198  | intron_variant                                                                                                                             |
| rs112241458 | intron_variant                                                                                                                             |
| rs112241458 | intron_variant                                                                                                                             |
| rs112241458 | intron_variant                                                                                                                             |
| rs112241458 | intron_variant                                                                                                                             |
| rs121913243 | genic_downstream_transcript_variant,non_coding_transcript_variant,missense_variant,coding_sequence_variant                                 |
| rs121913246 | genic_downstream_transcript_variant,non_coding_transcript_variant,missense_variant,coding_sequence_variant                                 |
| rs121913668 | genic_downstream_transcript_variant,non_coding_transcript_variant,missense_variant,coding_sequence_variant                                 |
| rs121913669 | genic_downstream_transcript_variant,non_coding_transcript_variant,missense_variant,coding_sequence_variant                                 |
| rs121913670 | genic_downstream_transcript_variant,non_coding_transcript_variant,missense_variant,coding_sequence_variant                                 |
| rs121913671 | genic_downstream_transcript_variant,non_coding_transcript_variant,missense_variant,coding_sequence_variant                                 |
| rs121913673 | genic_downstream_transcript_variant,non_coding_transcript_variant,missense_variant,coding_sequence_variant                                 |
| rs146651797 | missense_variant,non_coding_transcript_variant,genic_downstream_transcript_variant,synonymous_variant,coding_sequence_variant              |
| rs587780736 | intron_variant                                                                                                                             |
| rs587780736 | intron_variant                                                                                                                             |
| rs749738523 | missense_variant,genic_upstream_transcript_variant,intron_variant,non_coding_transcript_variant,coding_sequence_variant                    |
| rs763344951 | genic_upstream_transcript_variant,intron_variant,non_coding_transcript_variant,coding_sequence_variant,missense_variant                    |
| rs764960693 | non_coding_transcript_variant,coding_sequence_variant,missense_variant                                                                     |
| rs765244598 | non_coding_transcript_variant,coding_sequence_variant,missense_variant                                                                     |
| rs766900241 | intron_variant                                                                                                                             |
| rs770202229 | non_coding_transcript_variant,genic_upstream_transcript_variant,coding_sequence_variant,synonymous_variant,intron_variant                  |
| rs886061941 | intron_variant,genic_upstream_transcript_variant,non_coding_transcript_variant,5_prime_UTR_variant                                         |
| rs886061946 | 3_prime_UTR_variant,genic_downstream_transcript_variant,non_coding_transcript_variant                                                      |
| rs886061950 | 3_prime_UTR_variant,genic_downstream_transcript_variant,non_coding_transcript_variant                                                      |
| rs886061951 | 3_prime_UTR_variant,genic_downstream_transcript_variant,non_coding_transcript_variant                                                      |
| rs16945     | downstream_transcript_variant,500B_downstream_variant                                                                                      |
| rs28841     | intron_variant                                                                                                                             |
| rs38839     | 2KB_upstream_variant,intron_variant,upstream_transcript_variant,genic_upstream_transcript_variant                                          |
| rs38840     | genic_upstream_transcript_variant,intron_variant                                                                                           |
| rs38841     | genic_upstream_transcript_variant,intron_variant                                                                                           |
| rs38842     | genic_upstream_transcript_variant,intron_variant                                                                                           |
| rs38843     | genic_upstream_transcript_variant,intron_variant                                                                                           |
| rs38844     | genic_upstream_transcript_variant,intron_variant                                                                                           |
| rs38845     | genic_upstream_transcript_variant,intron_variant                                                                                           |
| rs38846     | genic_upstream_transcript_variant,intron_variant                                                                                           |
| rs38847     | genic_upstream_transcript_variant,intron_variant                                                                                           |
| rs38848     | genic_upstream_transcript_variant,intron_variant                                                                                           |
| rs38849     | genic_upstream_transcript_variant,intron_variant                                                                                           |
| rs38850     | genic_upstream_transcript_variant,intron_variant                                                                                           |
| rs38851     | genic_upstream_transcript_variant,intron_variant                                                                                           |
| rs38852     | genic_upstream_transcript_variant,intron_variant                                                                                           |
| rs38853     | genic_upstream_transcript_variant,intron_variant                                                                                           |
| rs38854     | genic_upstream_transcript_variant,intron_variant                                                                                           |
| rs38855     | genic_upstream_transcript_variant,intron_variant                                                                                           |
| rs38856     | genic_upstream_transcript_variant,intron_variant                                                                                           |
| rs38857     | intron_variant                                                                                                                             |
| rs38858     | intron_variant                                                                                                                             |
| rs38859     | intron_variant                                                                                                                             |
| rs38860     | intron_variant                                                                                                                             |
| rs39747     | genic_upstream_transcript_variant,intron_variant                                                                                           |
| rs39748     | genic_upstream_transcript_variant,intron_variant                                                                                           |
| rs39749     | genic_upstream_transcript_variant,intron_variant                                                                                           |
| rs39750     | upstream_transcript_variant,genic_upstream_transcript_variant,intron_variant                                                               |
| rs40238     | genic_upstream_transcript_variant,intron_variant                                                                                           |
| rs40239     | genic_upstream_transcript_variant,intron_variant                                                                                           |
| rs41735     | genic_downstream_transcript_variant,intron_variant                                                                                         |
| rs41741     | downstream_transcript_variant,500B_downstream_variant                                                                                      |
| rs168686    | genic_downstream_transcript_variant,intron_variant                                                                                         |
| rs183642    | genic_downstream_transcript_variant,intron_variant                                                                                         |

|            |                                                                                                   |
|------------|---------------------------------------------------------------------------------------------------|
| rs184953   | 2KB_upstream_variant,intron_variant,upstream_transcript_variant,genic_upstream_transcript_variant |
| rs193686   | genic_downstream_transcript_variant,intron_variant                                                |
| rs193687   | genic_downstream_transcript_variant,intron_variant                                                |
| rs193688   | genic_downstream_transcript_variant,intron_variant                                                |
| rs714180   | genic_upstream_transcript_variant,intron_variant                                                  |
| rs722134   | genic_upstream_transcript_variant,intron_variant                                                  |
| rs763538   | genic_upstream_transcript_variant,intron_variant                                                  |
| rs916941   | genic_downstream_transcript_variant,intron_variant                                                |
| rs1476454  | genic_upstream_transcript_variant,intron_variant                                                  |
| rs1858829  | genic_upstream_transcript_variant,intron_variant                                                  |
| rs2073560  | genic_downstream_transcript_variant,intron_variant                                                |
| rs2237708  | genic_upstream_transcript_variant,intron_variant                                                  |
| rs2237709  | genic_upstream_transcript_variant,intron_variant                                                  |
| rs2237710  | genic_upstream_transcript_variant,intron_variant                                                  |
| rs2237711  | genic_upstream_transcript_variant,intron_variant                                                  |
| rs2237712  | genic_upstream_transcript_variant,intron_variant                                                  |
| rs2237713  | genic_upstream_transcript_variant,intron_variant                                                  |
| rs2237714  | genic_upstream_transcript_variant,intron_variant                                                  |
| rs2237715  | intron_variant                                                                                    |
| rs2237716  | intron_variant                                                                                    |
| rs2237717  | intron_variant                                                                                    |
| rs2283051  | genic_upstream_transcript_variant,intron_variant                                                  |
| rs2283052  | genic_upstream_transcript_variant,intron_variant                                                  |
| rs2283053  | genic_downstream_transcript_variant,intron_variant                                                |
| rs2299433  | genic_upstream_transcript_variant,intron_variant                                                  |
| rs2299434  | genic_upstream_transcript_variant,intron_variant                                                  |
| rs2299435  | genic_upstream_transcript_variant,intron_variant                                                  |
| rs2299436  | genic_upstream_transcript_variant,intron_variant                                                  |
| rs2299437  | genic_upstream_transcript_variant,intron_variant                                                  |
| rs2299438  | genic_upstream_transcript_variant,intron_variant                                                  |
| rs2299439  | genic_downstream_transcript_variant,intron_variant                                                |
| rs2299440  | genic_downstream_transcript_variant,intron_variant                                                |
| rs2402118  | genic_downstream_transcript_variant,intron_variant                                                |
| rs2896191  | genic_upstream_transcript_variant,intron_variant                                                  |
| rs3031564  | 2KB_upstream_variant,intron_variant,upstream_transcript_variant,genic_upstream_transcript_variant |
| rs3220187  | intron_variant                                                                                    |
| rs3807996  | intron_variant                                                                                    |
| rs3807997  | genic_downstream_transcript_variant,intron_variant                                                |
| rs3840635  | genic_upstream_transcript_variant,intron_variant                                                  |
| rs3993905  | intron_variant                                                                                    |
| rs4330631  | genic_upstream_transcript_variant,intron_variant                                                  |
| rs4360233  | intron_variant                                                                                    |
| rs4566974  | genic_upstream_transcript_variant,intron_variant                                                  |
| rs4615490  | genic_upstream_transcript_variant,intron_variant                                                  |
| rs4727836  | intron_variant                                                                                    |
| rs5886835  | intron_variant                                                                                    |
| rs6466592  | intron_variant                                                                                    |
| rs6945273  | intron_variant                                                                                    |
| rs6946538  | intron_variant                                                                                    |
| rs6947629  | genic_downstream_transcript_variant,intron_variant                                                |
| rs6949201  | intron_variant                                                                                    |
| rs6951311  | genic_downstream_transcript_variant,intron_variant                                                |
| rs6954316  | genic_upstream_transcript_variant,intron_variant                                                  |
| rs6954327  | intron_variant                                                                                    |
| rs6965570  | genic_upstream_transcript_variant,intron_variant                                                  |
| rs6966012  | genic_downstream_transcript_variant,intron_variant                                                |
| rs6969853  | intron_variant                                                                                    |
| rs6978135  | genic_downstream_transcript_variant,intron_variant                                                |
| rs6978257  | genic_downstream_transcript_variant,intron_variant                                                |
| rs7785933  | genic_upstream_transcript_variant,intron_variant                                                  |
| rs7798983  | genic_upstream_transcript_variant,intron_variant                                                  |
| rs7804148  | intron_variant                                                                                    |
| rs7804632  | intron_variant                                                                                    |
| rs7804778  | intron_variant                                                                                    |
| rs7805089  | genic_upstream_transcript_variant,intron_variant                                                  |
| rs7810164  | genic_upstream_transcript_variant,intron_variant                                                  |
| rs9640772  | genic_upstream_transcript_variant,intron_variant                                                  |
| rs9641562  | genic_upstream_transcript_variant,intron_variant                                                  |
| rs9641563  | genic_upstream_transcript_variant,intron_variant                                                  |
| rs9641564  | genic_upstream_transcript_variant,intron_variant                                                  |
| rs9641565  | genic_downstream_transcript_variant,intron_variant                                                |
| rs9770051  | genic_downstream_transcript_variant,intron_variant                                                |
| rs10215153 | intron_variant                                                                                    |
| rs10223961 | genic_upstream_transcript_variant,intron_variant                                                  |

|            |                                                                                                    |
|------------|----------------------------------------------------------------------------------------------------|
| rs10232307 | intron_variant                                                                                     |
| rs10234854 | genic_upstream_transcript_variant,intron_variant                                                   |
| rs10235944 | intron_variant                                                                                     |
| rs10240033 | genic_upstream_transcript_variant,intron_variant                                                   |
| rs10243024 | genic_upstream_transcript_variant,intron_variant                                                   |
| rs10243964 | genic_downstream_transcript_variant,intron_variant                                                 |
| rs10244333 | intron_variant                                                                                     |
| rs10244916 | intron_variant                                                                                     |
| rs10246585 | genic_upstream_transcript_variant,intron_variant                                                   |
| rs10248537 | genic_upstream_transcript_variant,intron_variant                                                   |
| rs10258960 | genic_upstream_transcript_variant,intron_variant                                                   |
| rs10262620 | intron_variant                                                                                     |
| rs10266869 | intron_variant                                                                                     |
| rs10271561 | genic_upstream_transcript_variant,intron_variant                                                   |
| rs10278415 | intron_variant                                                                                     |
| rs10279782 | intron_variant                                                                                     |
| rs10435378 | genic_downstream_transcript_variant,intron_variant                                                 |
| rs10487353 | genic_upstream_transcript_variant,intron_variant                                                   |
| rs10674901 | intron_variant                                                                                     |
| rs10719237 | intron_variant                                                                                     |
| rs11404514 | genic_upstream_transcript_variant,intron_variant                                                   |
| rs11431559 | genic_downstream_transcript_variant,intron_variant                                                 |
| rs11763782 | intron_variant                                                                                     |
| rs11767567 | intron_variant,genic_upstream_transcript_variant                                                   |
| rs11770163 | intron_variant,genic_downstream_transcript_variant                                                 |
| rs11979548 | intron_variant                                                                                     |
| rs12386593 | intron_variant                                                                                     |
| rs12530841 | intron_variant,genic_upstream_transcript_variant                                                   |
| rs12533223 | intron_variant                                                                                     |
| rs12535996 | intron_variant,genic_upstream_transcript_variant                                                   |
| rs12539654 | 2KB_upstream_variant,intron_variant,genic_upstream_transcript_variant,upstream_transcript_variant  |
| rs12666656 | intron_variant,genic_upstream_transcript_variant                                                   |
| rs13221751 | intron_variant,genic_downstream_transcript_variant                                                 |
| rs13221767 | intron_variant,genic_downstream_transcript_variant                                                 |
| rs13222452 | non_coding_transcript_variant,genic_upstream_transcript_variant,intron_variant,5_prime_UTR_variant |
| rs13229115 | intron_variant,genic_upstream_transcript_variant                                                   |
| rs13232154 | 2KB_upstream_variant,genic_upstream_transcript_variant,upstream_transcript_variant,intron_variant  |
| rs13232252 | 2KB_upstream_variant,genic_upstream_transcript_variant,upstream_transcript_variant,intron_variant  |
| rs13234971 | intron_variant,genic_downstream_transcript_variant                                                 |
| rs13235174 | non_coding_transcript_variant,genic_upstream_transcript_variant,intron_variant,5_prime_UTR_variant |
| rs13239139 | intron_variant,genic_downstream_transcript_variant                                                 |
| rs13309274 | intron_variant                                                                                     |
| rs13309275 | intron_variant                                                                                     |
| rs13309280 | intron_variant                                                                                     |
| rs17136160 | intron_variant                                                                                     |
| rs17138937 | intron_variant,genic_upstream_transcript_variant                                                   |
| rs17138943 | intron_variant,genic_upstream_transcript_variant                                                   |
| rs17138945 | intron_variant,genic_upstream_transcript_variant                                                   |
| rs17138948 | intron_variant,genic_upstream_transcript_variant                                                   |
| rs17138950 | intron_variant,genic_upstream_transcript_variant                                                   |
| rs17138971 | intron_variant                                                                                     |
| rs17138980 | intron_variant                                                                                     |
| rs17138983 | intron_variant                                                                                     |
| rs17526983 | intron_variant,genic_downstream_transcript_variant                                                 |
| rs28396520 | intron_variant,genic_upstream_transcript_variant                                                   |
| rs28405781 | intron_variant                                                                                     |
| rs28407345 | intron_variant,genic_upstream_transcript_variant                                                   |
| rs28527400 | intron_variant,genic_upstream_transcript_variant                                                   |
| rs28544234 | intron_variant                                                                                     |
| rs28595367 | intron_variant,genic_downstream_transcript_variant                                                 |
| rs28662325 | intron_variant,genic_upstream_transcript_variant                                                   |
| rs28670381 | intron_variant,genic_upstream_transcript_variant                                                   |
| rs28716070 | intron_variant,genic_upstream_transcript_variant                                                   |
| rs28740948 | intron_variant                                                                                     |
| rs34276124 | intron_variant,genic_downstream_transcript_variant                                                 |
| rs34280975 | intron_variant,genic_downstream_transcript_variant                                                 |
| rs34430832 | intron_variant,genic_downstream_transcript_variant                                                 |
| rs34534013 | intron_variant                                                                                     |
| rs34570320 | intron_variant                                                                                     |
| rs34591721 | intron_variant,genic_upstream_transcript_variant                                                   |
| rs34613418 | intron_variant                                                                                     |
| rs34719004 | intron_variant,genic_downstream_transcript_variant                                                 |
| rs34784937 | intron_variant,genic_downstream_transcript_variant                                                 |
| rs34822187 | intron_variant,splice_acceptor_variant                                                             |

|            |                                                                                                                               |
|------------|-------------------------------------------------------------------------------------------------------------------------------|
| rs34830216 | intron_variant,genic_downstream_transcript_variant                                                                            |
| rs34849015 | genic_upstream_transcript_variant,intron_variant,frameshift_variant,non_coding_transcript_variant,coding_sequence_variant     |
| rs34858087 | intron_variant,genic_downstream_transcript_variant                                                                            |
| rs34878346 | intron_variant                                                                                                                |
| rs34906368 | intron_variant,genic_downstream_transcript_variant                                                                            |
| rs34939991 | 2KB_upstream_variant,genic_upstream_transcript_variant,upstream_transcript_variant,intron_variant                             |
| rs34986275 | intron_variant                                                                                                                |
| rs34993867 | intron_variant,genic_downstream_transcript_variant                                                                            |
| rs35017174 | intron_variant                                                                                                                |
| rs35027129 | intron_variant,genic_downstream_transcript_variant                                                                            |
| rs35060778 | intron_variant,genic_downstream_transcript_variant                                                                            |
| rs35189619 | intron_variant                                                                                                                |
| rs35199351 | intron_variant,genic_downstream_transcript_variant                                                                            |
| rs35212357 | intron_variant,genic_upstream_transcript_variant                                                                              |
| rs35260334 | intron_variant,genic_upstream_transcript_variant                                                                              |
| rs35307741 | intron_variant,genic_downstream_transcript_variant                                                                            |
| rs35309301 | intron_variant                                                                                                                |
| rs35314984 | intron_variant,genic_downstream_transcript_variant                                                                            |
| rs35400523 | intron_variant                                                                                                                |
| rs35404902 | intron_variant,genic_upstream_transcript_variant                                                                              |
| rs35422943 | intron_variant,genic_upstream_transcript_variant                                                                              |
| rs35448354 | intron_variant,genic_downstream_transcript_variant                                                                            |
| rs35487584 | intron_variant,genic_upstream_transcript_variant                                                                              |
| rs35514449 | intron_variant,genic_downstream_transcript_variant                                                                            |
| rs35523419 | intron_variant                                                                                                                |
| rs35548946 | intron_variant,genic_downstream_transcript_variant                                                                            |
| rs35624294 | intron_variant,genic_downstream_transcript_variant                                                                            |
| rs35626122 | intron_variant,genic_upstream_transcript_variant                                                                              |
| rs35650028 | intron_variant                                                                                                                |
| rs35731170 | intron_variant,genic_downstream_transcript_variant                                                                            |
| rs35759345 | intron_variant                                                                                                                |
| rs35939549 | intron_variant,genic_downstream_transcript_variant                                                                            |
| rs35955226 | intron_variant,genic_downstream_transcript_variant                                                                            |
| rs35990415 | intron_variant,genic_downstream_transcript_variant                                                                            |
| rs36013546 | intron_variant                                                                                                                |
| rs36031023 | intron_variant                                                                                                                |
| rs36076385 | intron_variant,genic_upstream_transcript_variant                                                                              |
| rs36115495 | intron_variant                                                                                                                |
| rs36198935 | intron_variant                                                                                                                |
| rs36222675 | 2KB_upstream_variant,genic_upstream_transcript_variant,upstream_transcript_variant,intron_variant                             |
| rs36222676 | 2KB_upstream_variant,genic_upstream_transcript_variant,upstream_transcript_variant,intron_variant                             |
| rs36222677 | 2KB_upstream_variant,genic_upstream_transcript_variant,upstream_transcript_variant,intron_variant                             |
| rs41281078 | intron_variant,genic_downstream_transcript_variant                                                                            |
| rs45450897 | coding_sequence_variant,missense_variant,non_coding_transcript_variant                                                        |
| rs45454696 | coding_sequence_variant,missense_variant,genic_downstream_transcript_variant,non_coding_transcript_variant                    |
| rs45471794 | coding_sequence_variant,missense_variant,genic_downstream_transcript_variant,non_coding_transcript_variant                    |
| rs45484593 | coding_sequence_variant,synonymous_variant,non_coding_transcript_variant                                                      |
| rs45489503 | coding_sequence_variant,synonymous_variant,genic_downstream_transcript_variant,non_coding_transcript_variant                  |
| rs45495699 | coding_sequence_variant,synonymous_variant,genic_downstream_transcript_variant,non_coding_transcript_variant                  |
| rs45496592 | coding_sequence_variant,synonymous_variant,genic_downstream_transcript_variant,non_coding_transcript_variant                  |
| rs45516592 | coding_sequence_variant,intron_variant,missense_variant                                                                       |
| rs45531032 | coding_sequence_variant,missense_variant,non_coding_transcript_variant                                                        |
| rs45532942 | coding_sequence_variant,missense_variant,genic_downstream_transcript_variant,non_coding_transcript_variant                    |
| rs45541232 | coding_sequence_variant,missense_variant,genic_downstream_transcript_variant,non_coding_transcript_variant                    |
| rs45571834 | coding_sequence_variant,missense_variant,genic_downstream_transcript_variant,non_coding_transcript_variant                    |
| rs45583838 | missense_variant,synonymous_variant,non_coding_transcript_variant,coding_sequence_variant,genic_downstream_transcript_variant |
| rs45592637 | coding_sequence_variant,synonymous_variant,non_coding_transcript_variant                                                      |
| rs45595632 | coding_sequence_variant,missense_variant,genic_downstream_transcript_variant,non_coding_transcript_variant                    |
| rs45604032 | coding_sequence_variant,missense_variant,genic_downstream_transcript_variant,non_coding_transcript_variant                    |
| rs45605635 | coding_sequence_variant,missense_variant,non_coding_transcript_variant                                                        |
| rs55830642 | intron_variant,genic_upstream_transcript_variant                                                                              |
| rs56197157 | intron_variant                                                                                                                |
| rs56212730 | intron_variant,genic_downstream_transcript_variant                                                                            |
| rs56258803 | intron_variant                                                                                                                |
| rs56339508 | intron_variant,genic_downstream_transcript_variant                                                                            |
| rs56361366 | coding_sequence_variant,missense_variant,non_coding_transcript_variant                                                        |
| rs57013376 | intron_variant,genic_upstream_transcript_variant                                                                              |
| rs57028965 | intron_variant,genic_upstream_transcript_variant                                                                              |
| rs57097899 | intron_variant                                                                                                                |
| rs57132241 | intron_variant,genic_upstream_transcript_variant                                                                              |
| rs57149583 | intron_variant,genic_upstream_transcript_variant                                                                              |
| rs57407780 | intron_variant,genic_upstream_transcript_variant                                                                              |
| rs57669948 | intron_variant                                                                                                                |
| rs57693890 | intron_variant,genic_upstream_transcript_variant                                                                              |

|            |                                                                                                   |
|------------|---------------------------------------------------------------------------------------------------|
| rs57713644 | intron_variant,genic_upstream_transcript_variant,upstream_transcript_variant,2KB_upstream_variant |
| rs57789859 | intron_variant,genic_upstream_transcript_variant                                                  |
| rs58086374 | intron_variant                                                                                    |
| rs58131984 | intron_variant,genic_upstream_transcript_variant,upstream_transcript_variant,2KB_upstream_variant |
| rs58444900 | intron_variant,genic_upstream_transcript_variant                                                  |
| rs58668564 | intron_variant,genic_upstream_transcript_variant                                                  |
| rs58950839 | intron_variant                                                                                    |
| rs59088564 | intron_variant                                                                                    |
| rs59291978 | intron_variant                                                                                    |
| rs59375450 | intron_variant                                                                                    |
| rs59578108 | intron_variant,genic_upstream_transcript_variant                                                  |
| rs59578693 | intron_variant                                                                                    |
| rs59673590 | intron_variant,genic_upstream_transcript_variant                                                  |
| rs59745285 | intron_variant                                                                                    |
| rs60046562 | intron_variant                                                                                    |
| rs60405829 | intron_variant                                                                                    |
| rs60600263 | intron_variant,genic_upstream_transcript_variant                                                  |
| rs60604040 | intron_variant,genic_downstream_transcript_variant                                                |
| rs60649413 | intron_variant                                                                                    |
| rs60730452 | intron_variant                                                                                    |
| rs60935558 | intron_variant                                                                                    |
| rs61038471 | intron_variant,genic_upstream_transcript_variant                                                  |
| rs61248776 | intron_variant                                                                                    |
| rs61293424 | intron_variant,genic_upstream_transcript_variant                                                  |
| rs61513761 | intron_variant,genic_upstream_transcript_variant                                                  |
| rs61651280 | intron_variant                                                                                    |
| rs62469050 | upstream_transcript_variant,genic_upstream_transcript_variant,intron_variant,2KB_upstream_variant |
| rs62469051 | intron_variant,genic_upstream_transcript_variant                                                  |
| rs62469052 | intron_variant,genic_upstream_transcript_variant                                                  |
| rs62469053 | intron_variant,genic_upstream_transcript_variant                                                  |
| rs62469054 | intron_variant,genic_upstream_transcript_variant                                                  |
| rs62469056 | intron_variant,genic_upstream_transcript_variant                                                  |
| rs62470761 | intron_variant                                                                                    |
| rs62470762 | intron_variant                                                                                    |
| rs62470763 | intron_variant                                                                                    |
| rs66712866 | intron_variant,genic_upstream_transcript_variant,upstream_transcript_variant,2KB_upstream_variant |
| rs66849348 | intron_variant                                                                                    |
| rs66904901 | intron_variant,genic_downstream_transcript_variant                                                |
| rs66908760 | intron_variant,genic_upstream_transcript_variant                                                  |
| rs66996050 | intron_variant                                                                                    |
| rs67297106 | intron_variant                                                                                    |
| rs71148331 | intron_variant                                                                                    |
| rs71314626 | intron_variant                                                                                    |
| rs71528111 | intron_variant,genic_upstream_transcript_variant                                                  |
| rs71529475 | intron_variant,genic_downstream_transcript_variant                                                |
| rs71564564 | upstream_transcript_variant,genic_upstream_transcript_variant,intron_variant,2KB_upstream_variant |
| rs71564566 | intron_variant                                                                                    |
| rs73208158 | intron_variant,genic_upstream_transcript_variant                                                  |
| rs73208159 | intron_variant,genic_upstream_transcript_variant                                                  |
| rs73208161 | intron_variant,genic_upstream_transcript_variant                                                  |
| rs73208165 | intron_variant                                                                                    |
| rs73208168 | intron_variant                                                                                    |
| rs73469167 | intron_variant,genic_upstream_transcript_variant                                                  |
| rs73469170 | intron_variant,genic_upstream_transcript_variant                                                  |
| rs73469173 | intron_variant,genic_upstream_transcript_variant                                                  |
| rs73469178 | intron_variant,genic_upstream_transcript_variant                                                  |
| rs73469179 | intron_variant,genic_upstream_transcript_variant                                                  |
| rs73469188 | intron_variant,genic_upstream_transcript_variant                                                  |
| rs73469197 | intron_variant                                                                                    |
| rs73471107 | intron_variant                                                                                    |
| rs73471108 | intron_variant                                                                                    |
| rs73471109 | intron_variant                                                                                    |
| rs73471110 | intron_variant                                                                                    |
| rs73471113 | intron_variant                                                                                    |
| rs73471127 | intron_variant,genic_downstream_transcript_variant                                                |
| rs73471134 | intron_variant,genic_downstream_transcript_variant                                                |
| rs73471137 | intron_variant,genic_downstream_transcript_variant                                                |
| rs73471139 | intron_variant,genic_downstream_transcript_variant                                                |
| rs73716760 | intron_variant,genic_upstream_transcript_variant,upstream_transcript_variant,2KB_upstream_variant |
| rs73716765 | intron_variant                                                                                    |
| rs73716767 | intron_variant                                                                                    |
| rs73716769 | intron_variant,genic_downstream_transcript_variant                                                |
| rs73716770 | intron_variant,genic_downstream_transcript_variant                                                |
| rs73716771 | intron_variant,genic_downstream_transcript_variant                                                |

|            |                                                                                                                         |
|------------|-------------------------------------------------------------------------------------------------------------------------|
| rs73716772 | intron_variant,genic_downstream_transcript_variant                                                                      |
| rs74217195 | intron_variant                                                                                                          |
| rs74367828 | intron_variant                                                                                                          |
| rs74368568 | intron_variant,genic_upstream_transcript_variant,upstream_transcript_variant,2KB_upstream_variant                       |
| rs74463536 | intron_variant                                                                                                          |
| rs74513265 | intron_variant                                                                                                          |
| rs74621320 | intron_variant,genic_upstream_transcript_variant                                                                        |
| rs74779712 | intron_variant                                                                                                          |
| rs74867453 | intron_variant,genic_upstream_transcript_variant                                                                        |
| rs74957944 | intron_variant,genic_downstream_transcript_variant                                                                      |
| rs75081540 | intron_variant,genic_upstream_transcript_variant                                                                        |
| rs75159953 | intron_variant,genic_upstream_transcript_variant                                                                        |
| rs75195568 | intron_variant,genic_upstream_transcript_variant                                                                        |
| rs75217062 | intron_variant,genic_downstream_transcript_variant                                                                      |
| rs75218076 | intron_variant,genic_downstream_transcript_variant                                                                      |
| rs75261998 | intron_variant,genic_upstream_transcript_variant                                                                        |
| rs75311055 | intron_variant,genic_downstream_transcript_variant                                                                      |
| rs75311991 | intron_variant,genic_upstream_transcript_variant                                                                        |
| rs75318810 | intron_variant,genic_downstream_transcript_variant                                                                      |
| rs75347282 | intron_variant,genic_upstream_transcript_variant                                                                        |
| rs75361918 | non_coding_transcript_variant,3_prime_UTR_variant,genic_downstream_transcript_variant                                   |
| rs75444692 | intron_variant,genic_upstream_transcript_variant                                                                        |
| rs75459774 | intron_variant,genic_upstream_transcript_variant                                                                        |
| rs75483684 | intron_variant,genic_upstream_transcript_variant                                                                        |
| rs75577506 | intron_variant,genic_upstream_transcript_variant                                                                        |
| rs75598970 | intron_variant                                                                                                          |
| rs75760645 | intron_variant                                                                                                          |
| rs75770850 | intron_variant,genic_upstream_transcript_variant                                                                        |
| rs75808049 | intron_variant,genic_upstream_transcript_variant                                                                        |
| rs75841034 | intron_variant,genic_upstream_transcript_variant,upstream_transcript_variant,2KB_upstream_variant                       |
| rs75852138 | intron_variant                                                                                                          |
| rs75855514 | intron_variant                                                                                                          |
| rs75887793 | 500B_downstream_variant,downstream_transcript_variant                                                                   |
| rs75921106 | intron_variant,genic_upstream_transcript_variant                                                                        |
| rs75971075 | intron_variant,genic_upstream_transcript_variant                                                                        |
| rs75975306 | intron_variant,genic_upstream_transcript_variant                                                                        |
| rs76037678 | intron_variant,genic_upstream_transcript_variant                                                                        |
| rs76043381 | intron_variant,genic_upstream_transcript_variant                                                                        |
| rs76116343 | intron_variant                                                                                                          |
| rs76256933 | intron_variant,genic_upstream_transcript_variant                                                                        |
| rs76405901 | intron_variant,genic_downstream_transcript_variant                                                                      |
| rs76446249 | intron_variant,genic_upstream_transcript_variant                                                                        |
| rs76452897 | intron_variant,genic_upstream_transcript_variant                                                                        |
| rs76484229 | intron_variant,genic_upstream_transcript_variant                                                                        |
| rs76525083 | intron_variant,genic_upstream_transcript_variant                                                                        |
| rs76558705 | intron_variant,genic_downstream_transcript_variant                                                                      |
| rs76575533 | intron_variant                                                                                                          |
| rs76631208 | intron_variant,genic_upstream_transcript_variant,non_coding_transcript_variant                                          |
| rs76729878 | intron_variant,genic_downstream_transcript_variant                                                                      |
| rs76827029 | intron_variant                                                                                                          |
| rs76963637 | intron_variant,genic_downstream_transcript_variant                                                                      |
| rs76992406 | intron_variant                                                                                                          |
| rs77100113 | intron_variant,genic_upstream_transcript_variant                                                                        |
| rs77112188 | intron_variant,genic_downstream_transcript_variant                                                                      |
| rs77377485 | intron_variant,genic_downstream_transcript_variant                                                                      |
| rs77387230 | intron_variant,genic_upstream_transcript_variant                                                                        |
| rs77408757 | intron_variant,genic_downstream_transcript_variant                                                                      |
| rs77429602 | intron_variant,genic_upstream_transcript_variant                                                                        |
| rs77497856 | intron_variant                                                                                                          |
| rs77516370 | intron_variant                                                                                                          |
| rs77522444 | intron_variant                                                                                                          |
| rs77546020 | intron_variant,genic_upstream_transcript_variant                                                                        |
| rs77603709 | intron_variant,genic_upstream_transcript_variant                                                                        |
| rs77616768 | intron_variant                                                                                                          |
| rs77635956 | intron_variant                                                                                                          |
| rs77636459 | intron_variant,genic_upstream_transcript_variant                                                                        |
| rs77651398 | non_coding_transcript_variant,intron_variant,coding_sequence_variant,missense_variant,genic_upstream_transcript_variant |
| rs77653812 | intron_variant,genic_upstream_transcript_variant                                                                        |
| rs77680491 | intron_variant                                                                                                          |
| rs77782453 | intron_variant,genic_upstream_transcript_variant                                                                        |
| rs77851542 | intron_variant,genic_upstream_transcript_variant                                                                        |
| rs77887158 | intron_variant,genic_upstream_transcript_variant                                                                        |
| rs77907624 | intron_variant,genic_upstream_transcript_variant,upstream_transcript_variant,2KB_upstream_variant                       |
| rs77978685 | intron_variant,genic_upstream_transcript_variant                                                                        |

|             |                                                                                                   |
|-------------|---------------------------------------------------------------------------------------------------|
| rs77993315  | intron_variant,genic_upstream_transcript_variant                                                  |
| rs78112475  | intron_variant,genic_downstream_transcript_variant                                                |
| rs78116323  | intron_variant,genic_upstream_transcript_variant                                                  |
| rs78164004  | intron_variant,genic_upstream_transcript_variant                                                  |
| rs78243835  | intron_variant                                                                                    |
| rs78247334  | intron_variant,genic_upstream_transcript_variant                                                  |
| rs78339146  | intron_variant,genic_downstream_transcript_variant                                                |
| rs78341555  | intron_variant,genic_upstream_transcript_variant                                                  |
| rs78453517  | intron_variant,genic_upstream_transcript_variant,upstream_transcript_variant,2KB_upstream_variant |
| rs78462472  | intron_variant                                                                                    |
| rs78483586  | intron_variant                                                                                    |
| rs78689264  | intron_variant,genic_upstream_transcript_variant                                                  |
| rs78841592  | intron_variant,genic_downstream_transcript_variant                                                |
| rs78896909  | intron_variant,genic_upstream_transcript_variant                                                  |
| rs79058672  | intron_variant,genic_upstream_transcript_variant                                                  |
| rs79078086  | intron_variant                                                                                    |
| rs79104788  | intron_variant                                                                                    |
| rs79115875  | intron_variant                                                                                    |
| rs79272363  | intron_variant                                                                                    |
| rs79326908  | intron_variant                                                                                    |
| rs79398475  | intron_variant,genic_upstream_transcript_variant                                                  |
| rs79424781  | intron_variant,genic_upstream_transcript_variant                                                  |
| rs79460379  | intron_variant,genic_downstream_transcript_variant                                                |
| rs79464413  | intron_variant,genic_upstream_transcript_variant,upstream_transcript_variant,2KB_upstream_variant |
| rs79620817  | intron_variant,genic_upstream_transcript_variant                                                  |
| rs79654553  | intron_variant,genic_upstream_transcript_variant                                                  |
| rs79655174  | intron_variant,genic_upstream_transcript_variant                                                  |
| rs79717477  | intron_variant,genic_downstream_transcript_variant                                                |
| rs79878822  | intron_variant,genic_downstream_transcript_variant                                                |
| rs79901542  | 2KB_upstream_variant,genic_upstream_transcript_variant,intron_variant,upstream_transcript_variant |
| rs80016017  | intron_variant                                                                                    |
| rs80019847  | intron_variant,genic_upstream_transcript_variant                                                  |
| rs80055619  | intron_variant,genic_upstream_transcript_variant                                                  |
| rs80102316  | intron_variant,genic_upstream_transcript_variant                                                  |
| rs80154660  | intron_variant,genic_upstream_transcript_variant                                                  |
| rs80259898  | intron_variant                                                                                    |
| rs80278428  | intron_variant                                                                                    |
| rs111309351 | intron_variant                                                                                    |
| rs111312176 | intron_variant                                                                                    |
| rs111416989 | intron_variant                                                                                    |
| rs111478642 | intron_variant,genic_downstream_transcript_variant                                                |
| rs111522192 | intron_variant,genic_downstream_transcript_variant                                                |
| rs111614112 | intron_variant,genic_upstream_transcript_variant                                                  |
| rs111616529 | intron_variant,genic_upstream_transcript_variant                                                  |
| rs111654103 | intron_variant                                                                                    |
| rs111680932 | intron_variant,genic_downstream_transcript_variant                                                |
| rs111699200 | intron_variant,genic_downstream_transcript_variant                                                |
| rs111710970 | intron_variant,genic_downstream_transcript_variant                                                |
| rs111794917 | intron_variant                                                                                    |
| rs111863186 | intron_variant,genic_upstream_transcript_variant                                                  |
| rs111900049 | intron_variant,genic_upstream_transcript_variant                                                  |
| rs111914725 | intron_variant                                                                                    |
| rs111955405 | intron_variant,genic_upstream_transcript_variant                                                  |
| rs111972263 | intron_variant                                                                                    |
| rs112024074 | intron_variant,genic_upstream_transcript_variant                                                  |
| rs112078932 | intron_variant                                                                                    |
| rs112093839 | intron_variant                                                                                    |
| rs112117974 | intron_variant,genic_upstream_transcript_variant                                                  |
| rs112155944 | intron_variant                                                                                    |
| rs112199560 | intron_variant,genic_downstream_transcript_variant                                                |
| rs112202696 | intron_variant                                                                                    |
| rs112205913 | intron_variant,genic_upstream_transcript_variant                                                  |
| rs112248112 | intron_variant,genic_upstream_transcript_variant                                                  |
| rs112249479 | genic_downstream_transcript_variant,3_prime_UTR_variant,non_coding_transcript_variant             |
| rs112251285 | intron_variant,genic_downstream_transcript_variant                                                |
| rs112270031 | intron_variant                                                                                    |
| rs112333710 | intron_variant                                                                                    |
| rs112394333 | intron_variant,genic_upstream_transcript_variant                                                  |
| rs112464343 | intron_variant                                                                                    |
| rs112486776 | intron_variant,genic_upstream_transcript_variant                                                  |
| rs112493416 | 2KB_upstream_variant,genic_upstream_transcript_variant,intron_variant,upstream_transcript_variant |
| rs112493453 | 2KB_upstream_variant,genic_upstream_transcript_variant,intron_variant,upstream_transcript_variant |
| rs112556889 | intron_variant,genic_downstream_transcript_variant                                                |
| rs112620858 | intron_variant                                                                                    |

|             |                                                                                                   |
|-------------|---------------------------------------------------------------------------------------------------|
| rs112644632 | intron_variant                                                                                    |
| rs112782799 | intron_variant                                                                                    |
| rs112798793 | intron_variant,genic_upstream_transcript_variant                                                  |
| rs112819631 | intron_variant,genic_upstream_transcript_variant                                                  |
| rs112849331 | intron_variant,genic_upstream_transcript_variant                                                  |
| rs112868493 | intron_variant,genic_upstream_transcript_variant                                                  |
| rs112890288 | intron_variant,genic_downstream_transcript_variant                                                |
| rs112945585 | intron_variant                                                                                    |
| rs113035202 | intron_variant,genic_upstream_transcript_variant,upstream_transcript_variant                      |
| rs113076725 | intron_variant                                                                                    |
| rs113080858 | intron_variant,genic_upstream_transcript_variant                                                  |
| rs113130716 | intron_variant                                                                                    |
| rs113205008 | 2KB_upstream_variant,genic_upstream_transcript_variant,intron_variant,upstream_transcript_variant |
| rs113255368 | intron_variant,genic_upstream_transcript_variant                                                  |
| rs113261722 | intron_variant                                                                                    |
| rs113467366 | intron_variant,genic_upstream_transcript_variant                                                  |
| rs113515365 | intron_variant,genic_downstream_transcript_variant                                                |
| rs113522915 | intron_variant,genic_downstream_transcript_variant                                                |
| rs113650927 | intron_variant,genic_upstream_transcript_variant                                                  |
| rs113656359 | intron_variant                                                                                    |
| rs113681741 | intron_variant                                                                                    |
| rs113698270 | intron_variant                                                                                    |
| rs113754807 | intron_variant,genic_upstream_transcript_variant                                                  |
| rs113763118 | intron_variant,genic_downstream_transcript_variant                                                |
| rs113806645 | intron_variant,genic_downstream_transcript_variant                                                |
| rs113841457 | intron_variant,genic_upstream_transcript_variant                                                  |
| rs113974855 | intron_variant,genic_upstream_transcript_variant                                                  |
| rs113992893 | intron_variant                                                                                    |
| rs114079927 | intron_variant,genic_downstream_transcript_variant                                                |
| rs114202452 | intron_variant,downstream_transcript_variant,genic_downstream_transcript_variant                  |
| rs114305562 | intron_variant,genic_upstream_transcript_variant                                                  |
| rs114392631 | intron_variant,genic_downstream_transcript_variant                                                |
| rs114615446 | intron_variant                                                                                    |
| rs114692368 | intron_variant,genic_upstream_transcript_variant                                                  |
| rs114707545 | intron_variant,genic_downstream_transcript_variant                                                |
| rs114709616 | intron_variant,genic_upstream_transcript_variant                                                  |
| rs114767833 | intron_variant                                                                                    |
| rs114822722 | intron_variant,genic_upstream_transcript_variant                                                  |
| rs114977543 | intron_variant,genic_upstream_transcript_variant                                                  |
| rs115088619 | intron_variant,genic_upstream_transcript_variant                                                  |
| rs115164400 | intron_variant,genic_downstream_transcript_variant                                                |
| rs115208619 | intron_variant                                                                                    |
| rs115240747 | intron_variant,genic_downstream_transcript_variant                                                |
| rs115286439 | intron_variant                                                                                    |
| rs115293079 | intron_variant,genic_downstream_transcript_variant                                                |
| rs115313396 | intron_variant,genic_upstream_transcript_variant                                                  |
| rs115485522 | intron_variant,genic_upstream_transcript_variant                                                  |
| rs115566611 | intron_variant                                                                                    |
| rs115628473 | intron_variant                                                                                    |
| rs115738760 | intron_variant,genic_upstream_transcript_variant                                                  |
| rs115851641 | intron_variant,genic_upstream_transcript_variant                                                  |
| rs115870111 | intron_variant,genic_upstream_transcript_variant                                                  |
| rs115875256 | intron_variant,genic_upstream_transcript_variant                                                  |
| rs115909573 | intron_variant                                                                                    |
| rs115953870 | intron_variant,genic_downstream_transcript_variant                                                |
| rs116041574 | intron_variant,genic_downstream_transcript_variant                                                |
| rs116188641 | intron_variant,genic_upstream_transcript_variant                                                  |
| rs116190704 | intron_variant,genic_upstream_transcript_variant                                                  |
| rs116218483 | intron_variant,genic_upstream_transcript_variant                                                  |
| rs116276647 | intron_variant,genic_upstream_transcript_variant                                                  |
| rs116312019 | intron_variant,genic_upstream_transcript_variant                                                  |
| rs116458171 | intron_variant,genic_upstream_transcript_variant                                                  |
| rs116481715 | intron_variant,genic_upstream_transcript_variant                                                  |
| rs116530062 | intron_variant                                                                                    |
| rs116569774 | intron_variant                                                                                    |
| rs116662833 | intron_variant,genic_upstream_transcript_variant                                                  |
| rs116709476 | intron_variant,genic_upstream_transcript_variant                                                  |
| rs116870479 | intron_variant,genic_upstream_transcript_variant                                                  |
| rs116901588 | intron_variant,genic_upstream_transcript_variant                                                  |
| rs116921956 | genic_downstream_transcript_variant,intron_variant,downstream_transcript_variant                  |
| rs116952382 | intron_variant,genic_upstream_transcript_variant                                                  |
| rs117028963 | intron_variant,genic_upstream_transcript_variant                                                  |
| rs117029561 | intron_variant                                                                                    |
| rs117062893 | intron_variant,genic_upstream_transcript_variant                                                  |

|             |                                                                                                   |
|-------------|---------------------------------------------------------------------------------------------------|
| rs117066610 | intron_variant,genic_upstream_transcript_variant                                                  |
| rs117120979 | intron_variant                                                                                    |
| rs117181391 | intron_variant                                                                                    |
| rs117274849 | intron_variant                                                                                    |
| rs117350321 | genic_downstream_transcript_variant,intron_variant                                                |
| rs117369473 | intron_variant,genic_upstream_transcript_variant                                                  |
| rs117459423 | genic_downstream_transcript_variant,intron_variant                                                |
| rs117585786 | genic_downstream_transcript_variant,intron_variant                                                |
| rs117602546 | intron_variant,genic_upstream_transcript_variant                                                  |
| rs117610086 | intron_variant,genic_upstream_transcript_variant                                                  |
| rs117674594 | intron_variant,genic_upstream_transcript_variant                                                  |
| rs117780183 | intron_variant,genic_upstream_transcript_variant                                                  |
| rs117805272 | genic_downstream_transcript_variant,intron_variant                                                |
| rs117877994 | intron_variant                                                                                    |
| rs117927707 | genic_downstream_transcript_variant,intron_variant                                                |
| rs117930107 | intron_variant,genic_upstream_transcript_variant                                                  |
| rs117965622 | intron_variant                                                                                    |
| rs118043302 | genic_downstream_transcript_variant,intron_variant                                                |
| rs118052543 | intron_variant                                                                                    |
| rs118133676 | intron_variant                                                                                    |
| rs118157537 | intron_variant,genic_upstream_transcript_variant                                                  |
| rs137856686 | intron_variant,genic_upstream_transcript_variant                                                  |
| rs137920591 | intron_variant                                                                                    |
| rs137929201 | intron_variant,genic_upstream_transcript_variant                                                  |
| rs137975449 | intron_variant                                                                                    |
| rs138041456 | intron_variant                                                                                    |
| rs138083038 | intron_variant,genic_upstream_transcript_variant                                                  |
| rs138132213 | intron_variant                                                                                    |
| rs138177961 | intron_variant,genic_upstream_transcript_variant                                                  |
| rs138190830 | intron_variant,genic_upstream_transcript_variant                                                  |
| rs138198060 | genic_downstream_transcript_variant,intron_variant                                                |
| rs138237329 | intron_variant,genic_upstream_transcript_variant                                                  |
| rs138238598 | genic_downstream_transcript_variant,intron_variant                                                |
| rs138248022 | intron_variant,genic_upstream_transcript_variant                                                  |
| rs138302919 | intron_variant,genic_upstream_transcript_variant                                                  |
| rs138369472 | intron_variant                                                                                    |
| rs138488688 | intron_variant                                                                                    |
| rs138528479 | intron_variant                                                                                    |
| rs138536032 | intron_variant,genic_upstream_transcript_variant                                                  |
| rs138575615 | intron_variant                                                                                    |
| rs138598351 | intron_variant,genic_upstream_transcript_variant                                                  |
| rs138624555 | intron_variant                                                                                    |
| rs138637051 | intron_variant                                                                                    |
| rs138649688 | intron_variant,genic_upstream_transcript_variant                                                  |
| rs138784802 | intron_variant                                                                                    |
| rs138845890 | genic_downstream_transcript_variant,intron_variant                                                |
| rs138854086 | intron_variant,genic_upstream_transcript_variant                                                  |
| rs138854909 | genic_downstream_transcript_variant,intron_variant                                                |
| rs138858254 | intron_variant                                                                                    |
| rs138860626 | intron_variant,genic_upstream_transcript_variant                                                  |
| rs138906839 | genic_downstream_transcript_variant,intron_variant                                                |
| rs138907870 | genic_downstream_transcript_variant,intron_variant                                                |
| rs138917893 | intron_variant,genic_upstream_transcript_variant                                                  |
| rs138981451 | intron_variant                                                                                    |
| rs139045186 | genic_downstream_transcript_variant,intron_variant                                                |
| rs139081517 | 2KB_upstream_variant,intron_variant,genic_upstream_transcript_variant,upstream_transcript_variant |
| rs139220708 | intron_variant                                                                                    |
| rs139254855 | intron_variant,2KB_upstream_variant,genic_upstream_transcript_variant,upstream_transcript_variant |
| rs139261309 | intron_variant,genic_upstream_transcript_variant                                                  |
| rs139317854 | intron_variant,genic_upstream_transcript_variant                                                  |
| rs139333175 | intron_variant,genic_upstream_transcript_variant                                                  |
| rs139335187 | intron_variant                                                                                    |
| rs139360435 | intron_variant                                                                                    |
| rs139384329 | intron_variant,genic_upstream_transcript_variant                                                  |
| rs139396986 | genic_downstream_transcript_variant,intron_variant                                                |
| rs139400929 | intron_variant,genic_upstream_transcript_variant                                                  |
| rs139463164 | intron_variant                                                                                    |
| rs139529354 | genic_downstream_transcript_variant,intron_variant                                                |
| rs139540494 | intron_variant,genic_upstream_transcript_variant                                                  |
| rs139591994 | genic_downstream_transcript_variant,intron_variant                                                |
| rs139706580 | intron_variant                                                                                    |
| rs139744904 | intron_variant                                                                                    |
| rs139814860 | intron_variant,genic_upstream_transcript_variant                                                  |
| rs139824613 | intron_variant,genic_upstream_transcript_variant                                                  |

|             |                                                                                                   |
|-------------|---------------------------------------------------------------------------------------------------|
| rs139923707 | intron_variant                                                                                    |
| rs139956298 | intron_variant                                                                                    |
| rs139963946 | intron_variant                                                                                    |
| rs140027773 | genic_downstream_transcript_variant,intron_variant                                                |
| rs140100846 | intron_variant,genic_upstream_transcript_variant                                                  |
| rs140137399 | intron_variant,genic_upstream_transcript_variant                                                  |
| rs140166469 | genic_downstream_transcript_variant,intron_variant                                                |
| rs140234353 | intron_variant,genic_upstream_transcript_variant                                                  |
| rs140239955 | intron_variant                                                                                    |
| rs140308712 | intron_variant                                                                                    |
| rs140308737 | intron_variant,genic_upstream_transcript_variant                                                  |
| rs140369608 | intron_variant                                                                                    |
| rs140372906 | intron_variant                                                                                    |
| rs140390284 | 2KB_upstream_variant,intron_variant,genic_upstream_transcript_variant,upstream_transcript_variant |
| rs140435978 | genic_downstream_transcript_variant,intron_variant                                                |
| rs140439141 | intron_variant                                                                                    |
| rs140446411 | intron_variant,genic_upstream_transcript_variant                                                  |
| rs140481959 | intron_variant,genic_upstream_transcript_variant                                                  |
| rs140508886 | intron_variant                                                                                    |
| rs140508991 | downstream_transcript_variant,500B_downstream_variant                                             |
| rs140632871 | intron_variant                                                                                    |
| rs140652385 | intron_variant                                                                                    |
| rs140712080 | intron_variant                                                                                    |
| rs140723017 | intron_variant,genic_upstream_transcript_variant                                                  |
| rs140736731 | intron_variant,genic_upstream_transcript_variant                                                  |
| rs140794452 | intron_variant                                                                                    |
| rs140818026 | intron_variant                                                                                    |
| rs140824245 | genic_downstream_transcript_variant,intron_variant                                                |
| rs140864161 | genic_downstream_transcript_variant,intron_variant                                                |
| rs140868029 | intron_variant,genic_upstream_transcript_variant                                                  |
| rs140930646 | intron_variant                                                                                    |
| rs140971436 | intron_variant                                                                                    |
| rs141179034 | intron_variant                                                                                    |
| rs141199678 | intron_variant                                                                                    |
| rs141220474 | intron_variant,genic_upstream_transcript_variant                                                  |
| rs141231432 | intron_variant,2KB_upstream_variant,genic_upstream_transcript_variant,upstream_transcript_variant |
| rs141256603 | intron_variant,genic_upstream_transcript_variant                                                  |
| rs141329901 | genic_downstream_transcript_variant,intron_variant                                                |
| rs141338324 | intron_variant,genic_upstream_transcript_variant                                                  |
| rs141395129 | genic_downstream_transcript_variant,intron_variant                                                |
| rs141409396 | genic_downstream_transcript_variant,intron_variant                                                |
| rs141414046 | intron_variant,genic_upstream_transcript_variant                                                  |
| rs141519069 | intron_variant,genic_upstream_transcript_variant                                                  |
| rs141552422 | intron_variant                                                                                    |
| rs141660864 | intron_variant,genic_upstream_transcript_variant                                                  |
| rs141665829 | intron_variant                                                                                    |
| rs141687946 | intron_variant,genic_upstream_transcript_variant                                                  |
| rs141693647 | intron_variant                                                                                    |
| rs141698670 | intron_variant,genic_upstream_transcript_variant                                                  |
| rs141754088 | intron_variant,genic_upstream_transcript_variant                                                  |
| rs141796362 | intron_variant                                                                                    |
| rs141821960 | intron_variant,genic_upstream_transcript_variant                                                  |
| rs141836842 | intron_variant                                                                                    |
| rs141868901 | genic_downstream_transcript_variant,intron_variant                                                |
| rs141975249 | genic_downstream_transcript_variant,intron_variant                                                |
| rs141978615 | 2KB_upstream_variant,intron_variant,genic_upstream_transcript_variant,upstream_transcript_variant |
| rs141999552 | intron_variant                                                                                    |
| rs142038039 | intron_variant,genic_upstream_transcript_variant                                                  |
| rs142049996 | intron_variant,genic_upstream_transcript_variant                                                  |
| rs142065796 | intron_variant                                                                                    |
| rs142065996 | genic_downstream_transcript_variant,intron_variant                                                |
| rs142130317 | genic_downstream_transcript_variant,intron_variant                                                |
| rs142156056 | intron_variant                                                                                    |
| rs142169934 | intron_variant                                                                                    |
| rs142188792 | genic_downstream_transcript_variant,intron_variant                                                |
| rs142208803 | intron_variant,genic_upstream_transcript_variant                                                  |
| rs142232873 | intron_variant,genic_upstream_transcript_variant                                                  |
| rs142235447 | intron_variant                                                                                    |
| rs142296370 | intron_variant                                                                                    |
| rs142414409 | intron_variant                                                                                    |
| rs142472407 | intron_variant,genic_upstream_transcript_variant                                                  |
| rs142499284 | genic_downstream_transcript_variant,intron_variant                                                |
| rs142504410 | intron_variant,genic_upstream_transcript_variant                                                  |
| rs142534912 | intron_variant                                                                                    |

|             |                                                                                                   |
|-------------|---------------------------------------------------------------------------------------------------|
| rs142608712 | intron_variant,genic_upstream_transcript_variant                                                  |
| rs142641212 | intron_variant                                                                                    |
| rs142688112 | genic_downstream_transcript_variant,intron_variant                                                |
| rs142693440 | 2KB_upstream_variant,intron_variant,genic_upstream_transcript_variant,upstream_transcript_variant |
| rs142828636 | intron_variant,genic_upstream_transcript_variant                                                  |
| rs142834198 | downstream_transcript_variant,500B_downstream_variant                                             |
| rs142857764 | intron_variant                                                                                    |
| rs142859263 | intron_variant,genic_upstream_transcript_variant                                                  |
| rs142880865 | intron_variant                                                                                    |
| rs142881446 | intron_variant,genic_upstream_transcript_variant                                                  |
| rs142913753 | genic_downstream_transcript_variant,intron_variant                                                |
| rs142917092 | genic_downstream_transcript_variant,intron_variant                                                |
| rs142947751 | intron_variant                                                                                    |
| rs142954535 | intron_variant,genic_upstream_transcript_variant                                                  |
| rs142988622 | intron_variant,genic_upstream_transcript_variant                                                  |
| rs143084294 | intron_variant,genic_upstream_transcript_variant                                                  |
| rs143117128 | genic_downstream_transcript_variant,intron_variant                                                |
| rs143159217 | intron_variant,genic_upstream_transcript_variant                                                  |
| rs143224435 | intron_variant                                                                                    |
| rs143326665 | intron_variant                                                                                    |
| rs143338232 | genic_downstream_transcript_variant,non_coding_transcript_variant,3_prime_UTR_variant             |
| rs143345613 | intron_variant,genic_upstream_transcript_variant                                                  |
| rs143363456 | intron_variant,genic_upstream_transcript_variant                                                  |
| rs143406317 | intron_variant                                                                                    |
| rs143423869 | genic_downstream_transcript_variant,intron_variant                                                |
| rs143431244 | intron_variant                                                                                    |
| rs143433269 | 2KB_upstream_variant,intron_variant,genic_upstream_transcript_variant,upstream_transcript_variant |
| rs143499403 | intron_variant                                                                                    |
| rs143561006 | genic_downstream_transcript_variant,intron_variant                                                |
| rs143572798 | intron_variant                                                                                    |
| rs143608767 | intron_variant,genic_upstream_transcript_variant                                                  |
| rs143639433 | genic_downstream_transcript_variant,intron_variant                                                |
| rs143759287 | intron_variant,genic_upstream_transcript_variant                                                  |
| rs143784870 | intron_variant                                                                                    |
| rs143785217 | intron_variant                                                                                    |
| rs143789230 | intron_variant,genic_upstream_transcript_variant                                                  |
| rs143820071 | intron_variant                                                                                    |
| rs143823423 | intron_variant                                                                                    |
| rs143849410 | genic_downstream_transcript_variant,intron_variant                                                |
| rs143851859 | genic_downstream_transcript_variant,intron_variant                                                |
| rs143912481 | genic_downstream_transcript_variant,intron_variant                                                |
| rs143992058 | intron_variant,genic_upstream_transcript_variant                                                  |
| rs144076992 | genic_upstream_transcript_variant,intron_variant                                                  |
| rs144121012 | intron_variant                                                                                    |
| rs144142698 | intron_variant                                                                                    |
| rs144159965 | genic_upstream_transcript_variant,intron_variant                                                  |
| rs144248784 | genic_downstream_transcript_variant,intron_variant                                                |
| rs144259187 | genic_upstream_transcript_variant,intron_variant                                                  |
| rs144286944 | intron_variant                                                                                    |
| rs144325759 | genic_upstream_transcript_variant,intron_variant                                                  |
| rs144389682 | intron_variant                                                                                    |
| rs144456969 | intron_variant                                                                                    |
| rs144461358 | intron_variant                                                                                    |
| rs144526050 | intron_variant                                                                                    |
| rs144545627 | 2KB_upstream_variant,upstream_transcript_variant,genic_upstream_transcript_variant,intron_variant |
| rs144589233 | genic_downstream_transcript_variant,intron_variant                                                |
| rs144625154 | intron_variant                                                                                    |
| rs144672186 | genic_upstream_transcript_variant,intron_variant                                                  |
| rs144731030 | genic_downstream_transcript_variant,intron_variant                                                |
| rs144737828 | genic_upstream_transcript_variant,intron_variant                                                  |
| rs144803151 | intron_variant                                                                                    |
| rs144830337 | intron_variant                                                                                    |
| rs144899198 | genic_upstream_transcript_variant,intron_variant                                                  |
| rs144939114 | genic_downstream_transcript_variant,intron_variant                                                |
| rs144943989 | missense_variant,coding_sequence_variant,non_coding_transcript_variant                            |
| rs144944341 | genic_upstream_transcript_variant,intron_variant                                                  |
| rs144969165 | genic_upstream_transcript_variant,intron_variant                                                  |
| rs144978880 | genic_downstream_transcript_variant,intron_variant                                                |
| rs144982888 | 2KB_upstream_variant,upstream_transcript_variant,genic_upstream_transcript_variant,intron_variant |
| rs145019899 | genic_downstream_transcript_variant,intron_variant                                                |
| rs145025167 | genic_upstream_transcript_variant,intron_variant                                                  |
| rs145053814 | genic_downstream_transcript_variant,intron_variant                                                |
| rs145080745 | intron_variant                                                                                    |
| rs145145882 | intron_variant                                                                                    |

|             |                                                                                                   |
|-------------|---------------------------------------------------------------------------------------------------|
| rs145212056 | genic_downstream_transcript_variant,intron_variant                                                |
| rs145219972 | genic_upstream_transcript_variant,intron_variant                                                  |
| rs145290321 | genic_upstream_transcript_variant,intron_variant                                                  |
| rs145366707 | genic_upstream_transcript_variant,intron_variant                                                  |
| rs145396158 | intron_variant                                                                                    |
| rs145400702 | intron_variant                                                                                    |
| rs145435221 | intron_variant                                                                                    |
| rs145507435 | intron_variant                                                                                    |
| rs145545383 | intron_variant                                                                                    |
| rs145626474 | intron_variant                                                                                    |
| rs145680574 | intron_variant                                                                                    |
| rs145688984 | genic_upstream_transcript_variant,intron_variant                                                  |
| rs145762580 | genic_downstream_transcript_variant,intron_variant                                                |
| rs145989320 | intron_variant                                                                                    |
| rs146047396 | intron_variant                                                                                    |
| rs146094122 | genic_upstream_transcript_variant,intron_variant                                                  |
| rs146111367 | genic_downstream_transcript_variant,intron_variant                                                |
| rs146143332 | genic_downstream_transcript_variant,intron_variant                                                |
| rs146174097 | intron_variant                                                                                    |
| rs146215092 | genic_upstream_transcript_variant,intron_variant                                                  |
| rs146233711 | genic_upstream_transcript_variant,intron_variant                                                  |
| rs146252378 | intron_variant                                                                                    |
| rs146270757 | intron_variant                                                                                    |
| rs146334012 | intron_variant                                                                                    |
| rs146338275 | intron_variant                                                                                    |
| rs146352540 | intron_variant                                                                                    |
| rs146373122 | genic_downstream_transcript_variant,intron_variant                                                |
| rs146410999 | intron_variant                                                                                    |
| rs146429926 | genic_upstream_transcript_variant,intron_variant                                                  |
| rs146443768 | genic_upstream_transcript_variant,intron_variant                                                  |
| rs146514780 | intron_variant                                                                                    |
| rs146553361 | intron_variant                                                                                    |
| rs146652167 | genic_upstream_transcript_variant,intron_variant                                                  |
| rs146671520 | genic_downstream_transcript_variant,intron_variant                                                |
| rs146723491 | genic_upstream_transcript_variant,intron_variant                                                  |
| rs146735827 | genic_upstream_transcript_variant,intron_variant                                                  |
| rs146755153 | genic_upstream_transcript_variant,intron_variant                                                  |
| rs146812594 | 2KB_upstream_variant,upstream_transcript_variant,genic_upstream_transcript_variant,intron_variant |
| rs146851440 | intron_variant                                                                                    |
| rs146856514 | genic_upstream_transcript_variant,intron_variant                                                  |
| rs146856911 | intron_variant                                                                                    |
| rs146905991 | intron_variant                                                                                    |
| rs146977613 | intron_variant                                                                                    |
| rs146994340 | genic_downstream_transcript_variant,intron_variant                                                |
| rs146994411 | genic_upstream_transcript_variant,intron_variant                                                  |
| rs147010632 | genic_downstream_transcript_variant,intron_variant                                                |
| rs147081516 | intron_variant                                                                                    |
| rs147131910 | genic_upstream_transcript_variant,intron_variant                                                  |
| rs147148084 | intron_variant                                                                                    |
| rs147193493 | genic_upstream_transcript_variant,intron_variant                                                  |
| rs147309260 | intron_variant                                                                                    |
| rs147327246 | 2KB_upstream_variant,upstream_transcript_variant,genic_upstream_transcript_variant,intron_variant |
| rs147358921 | genic_downstream_transcript_variant,intron_variant                                                |
| rs147361638 | 2KB_upstream_variant,upstream_transcript_variant,genic_upstream_transcript_variant,intron_variant |
| rs147431845 | genic_upstream_transcript_variant,intron_variant                                                  |
| rs147449421 | genic_upstream_transcript_variant,intron_variant                                                  |
| rs147603374 | intron_variant                                                                                    |
| rs147637222 | genic_downstream_transcript_variant,intron_variant                                                |
| rs147691094 | intron_variant                                                                                    |
| rs147707965 | intron_variant                                                                                    |
| rs147794765 | genic_downstream_transcript_variant,intron_variant                                                |
| rs147797443 | genic_upstream_transcript_variant,intron_variant                                                  |
| rs147811552 | genic_downstream_transcript_variant,intron_variant                                                |
| rs147814057 | genic_upstream_transcript_variant,intron_variant                                                  |
| rs147919103 | genic_upstream_transcript_variant,intron_variant                                                  |
| rs148002080 | intron_variant                                                                                    |
| rs148073728 | intron_variant                                                                                    |
| rs148090539 | genic_downstream_transcript_variant,intron_variant                                                |
| rs148143237 | genic_downstream_transcript_variant,intron_variant                                                |
| rs148145098 | genic_upstream_transcript_variant,intron_variant                                                  |
| rs148164239 | genic_upstream_transcript_variant,intron_variant                                                  |
| rs148215519 | genic_upstream_transcript_variant,intron_variant                                                  |
| rs148234397 | genic_upstream_transcript_variant,intron_variant                                                  |
| rs148287228 | genic_upstream_transcript_variant,intron_variant                                                  |

|             |                                                                                                                         |
|-------------|-------------------------------------------------------------------------------------------------------------------------|
| rs148303685 | intron_variant                                                                                                          |
| rs148354710 | intron_variant                                                                                                          |
| rs148370379 | genic_downstream_transcript_variant,3_prime_UTR_variant,non_coding_transcript_variant                                   |
| rs148372965 | intron_variant                                                                                                          |
| rs148456388 | intron_variant                                                                                                          |
| rs148475572 | intron_variant                                                                                                          |
| rs148526613 | missense_variant,non_coding_transcript_variant,genic_upstream_transcript_variant,intron_variant,coding_sequence_variant |
| rs148544593 | genic_downstream_transcript_variant,intron_variant                                                                      |
| rs148595460 | genic_downstream_transcript_variant,intron_variant                                                                      |
| rs148612113 | genic_downstream_transcript_variant,intron_variant                                                                      |
| rs148663970 | genic_downstream_transcript_variant,intron_variant                                                                      |
| rs148666768 | 2KB_upstream_variant,upstream_transcript_variant,genic_upstream_transcript_variant,intron_variant                       |
| rs148685174 | genic_upstream_transcript_variant,intron_variant                                                                        |
| rs148755295 | intron_variant                                                                                                          |
| rs148755484 | intron_variant                                                                                                          |
| rs148807898 | intron_variant                                                                                                          |
| rs148858964 | intron_variant                                                                                                          |
| rs148859467 | genic_downstream_transcript_variant,intron_variant                                                                      |
| rs148861260 | genic_upstream_transcript_variant,intron_variant                                                                        |
| rs148910731 | intron_variant                                                                                                          |
| rs148915230 | genic_downstream_transcript_variant,intron_variant                                                                      |
| rs148930490 | genic_upstream_transcript_variant,intron_variant                                                                        |
| rs148997835 | intron_variant                                                                                                          |
| rs149050485 | genic_upstream_transcript_variant,intron_variant                                                                        |
| rs149066899 | genic_downstream_transcript_variant,intron_variant                                                                      |
| rs149118541 | genic_downstream_transcript_variant,intron_variant                                                                      |
| rs149121111 | genic_upstream_transcript_variant,intron_variant                                                                        |
| rs149138546 | intron_variant                                                                                                          |
| rs149242670 | intron_variant                                                                                                          |
| rs149251301 | intron_variant                                                                                                          |
| rs149313470 | genic_upstream_transcript_variant,intron_variant                                                                        |
| rs149364401 | genic_downstream_transcript_variant,intron_variant                                                                      |
| rs149385616 | genic_upstream_transcript_variant,intron_variant                                                                        |
| rs149402541 | intron_variant                                                                                                          |
| rs149456718 | genic_upstream_transcript_variant,intron_variant                                                                        |
| rs149508208 | genic_upstream_transcript_variant,intron_variant                                                                        |
| rs149524847 | intron_variant                                                                                                          |
| rs149577283 | genic_upstream_transcript_variant,intron_variant                                                                        |
| rs149593751 | genic_downstream_transcript_variant,intron_variant                                                                      |
| rs149645111 | genic_downstream_transcript_variant,intron_variant                                                                      |
| rs149678565 | intron_variant                                                                                                          |
| rs149697638 | intron_variant                                                                                                          |
| rs149704455 | intron_variant                                                                                                          |
| rs149838222 | genic_upstream_transcript_variant,intron_variant                                                                        |
| rs149857525 | intron_variant                                                                                                          |
| rs149889921 | genic_downstream_transcript_variant,intron_variant                                                                      |
| rs149927169 | intron_variant                                                                                                          |
| rs150031462 | genic_upstream_transcript_variant,intron_variant                                                                        |
| rs150047937 | intron_variant                                                                                                          |
| rs150081685 | genic_upstream_transcript_variant,intron_variant                                                                        |
| rs150133374 | genic_upstream_transcript_variant,intron_variant                                                                        |
| rs150149673 | genic_downstream_transcript_variant,intron_variant                                                                      |
| rs150169068 | genic_downstream_transcript_variant,intron_variant                                                                      |
| rs150289376 | intron_variant                                                                                                          |
| rs150310630 | genic_upstream_transcript_variant,intron_variant                                                                        |
| rs150341442 | intron_variant                                                                                                          |
| rs150379044 | intron_variant                                                                                                          |
| rs150431962 | intron_variant                                                                                                          |
| rs150432528 | genic_upstream_transcript_variant,intron_variant                                                                        |
| rs150485412 | genic_upstream_transcript_variant,intron_variant                                                                        |
| rs150536677 | genic_upstream_transcript_variant,intron_variant                                                                        |
| rs150606075 | genic_upstream_transcript_variant,intron_variant                                                                        |
| rs150624732 | intron_variant                                                                                                          |
| rs150673762 | genic_downstream_transcript_variant,intron_variant                                                                      |
| rs150675651 | intron_variant                                                                                                          |
| rs150691583 | genic_downstream_transcript_variant,intron_variant                                                                      |
| rs150744300 | intron_variant                                                                                                          |
| rs150814384 | intron_variant                                                                                                          |
| rs150832973 | genic_downstream_transcript_variant,intron_variant                                                                      |
| rs150835625 | genic_upstream_transcript_variant,intron_variant                                                                        |
| rs150888353 | genic_upstream_transcript_variant,intron_variant                                                                        |
| rs150904793 | intron_variant                                                                                                          |
| rs150918864 | intron_variant                                                                                                          |
| rs150976423 | intron_variant                                                                                                          |

|             |                                                                                       |
|-------------|---------------------------------------------------------------------------------------|
| rs150989423 | genic_downstream_transcript_variant,intron_variant                                    |
| rs150991259 | genic_upstream_transcript_variant,intron_variant                                      |
| rs150992859 | intron_variant                                                                        |
| rs151058444 | 500B_downstream_variant,downstream_transcript_variant                                 |
| rs151061160 | genic_upstream_transcript_variant,intron_variant                                      |
| rs151079868 | genic_upstream_transcript_variant,intron_variant                                      |
| rs151218135 | genic_downstream_transcript_variant,intron_variant                                    |
| rs151254852 | genic_upstream_transcript_variant,intron_variant                                      |
| rs151271433 | intron_variant                                                                        |
| rs151289561 | intron_variant                                                                        |
| rs151335286 | genic_upstream_transcript_variant,intron_variant                                      |
| rs180773571 | genic_downstream_transcript_variant,intron_variant                                    |
| rs180794948 | intron_variant                                                                        |
| rs180802565 | genic_downstream_transcript_variant,intron_variant                                    |
| rs180832548 | genic_downstream_transcript_variant,intron_variant                                    |
| rs180963374 | genic_upstream_transcript_variant,intron_variant                                      |
| rs181001374 | genic_upstream_transcript_variant,intron_variant                                      |
| rs181017470 | genic_upstream_transcript_variant,intron_variant                                      |
| rs181042500 | genic_downstream_transcript_variant,intron_variant                                    |
| rs181059104 | genic_upstream_transcript_variant,intron_variant                                      |
| rs181062044 | intron_variant                                                                        |
| rs181075269 | intron_variant                                                                        |
| rs181083017 | genic_downstream_transcript_variant,intron_variant                                    |
| rs181089956 | intron_variant                                                                        |
| rs181099511 | intron_variant                                                                        |
| rs181108979 | genic_upstream_transcript_variant,intron_variant                                      |
| rs181109101 | genic_downstream_transcript_variant,intron_variant                                    |
| rs181115606 | genic_upstream_transcript_variant,intron_variant                                      |
| rs181121462 | intron_variant                                                                        |
| rs181122307 | genic_upstream_transcript_variant,intron_variant                                      |
| rs181138331 | genic_upstream_transcript_variant,intron_variant                                      |
| rs181218108 | genic_upstream_transcript_variant,intron_variant                                      |
| rs181246833 | genic_upstream_transcript_variant,intron_variant                                      |
| rs181253089 | genic_upstream_transcript_variant,intron_variant                                      |
| rs181254131 | genic_upstream_transcript_variant,intron_variant                                      |
| rs181257423 | intron_variant                                                                        |
| rs181318630 | genic_downstream_transcript_variant,intron_variant                                    |
| rs181324784 | intron_variant                                                                        |
| rs181341965 | genic_downstream_transcript_variant,intron_variant                                    |
| rs181357178 | genic_upstream_transcript_variant,intron_variant                                      |
| rs181449499 | intron_variant                                                                        |
| rs181475273 | genic_upstream_transcript_variant,intron_variant                                      |
| rs181477949 | intron_variant                                                                        |
| rs181486234 | intron_variant                                                                        |
| rs181487844 | genic_upstream_transcript_variant,intron_variant                                      |
| rs181496887 | genic_downstream_transcript_variant,intron_variant                                    |
| rs181617254 | intron_variant,genic_upstream_transcript_variant                                      |
| rs181632403 | intron_variant,genic_upstream_transcript_variant                                      |
| rs181634052 | intron_variant,genic_upstream_transcript_variant                                      |
| rs181637225 | intron_variant                                                                        |
| rs181692338 | intron_variant                                                                        |
| rs181712796 | genic_downstream_transcript_variant,intron_variant                                    |
| rs181718280 | genic_downstream_transcript_variant,intron_variant                                    |
| rs181747548 | intron_variant,genic_upstream_transcript_variant                                      |
| rs181751458 | genic_downstream_transcript_variant,intron_variant                                    |
| rs181773926 | intron_variant                                                                        |
| rs181781631 | intron_variant                                                                        |
| rs181818408 | genic_downstream_transcript_variant,non_coding_transcript_variant,3_prime_UTR_variant |
| rs181832192 | genic_downstream_transcript_variant,intron_variant                                    |
| rs181850913 | intron_variant,genic_upstream_transcript_variant                                      |
| rs181877385 | intron_variant                                                                        |
| rs181920009 | intron_variant                                                                        |
| rs181926764 | intron_variant,genic_upstream_transcript_variant                                      |
| rs181970953 | intron_variant                                                                        |
| rs182124415 | intron_variant,genic_upstream_transcript_variant                                      |
| rs182131737 | intron_variant                                                                        |
| rs182155621 | genic_downstream_transcript_variant,intron_variant                                    |
| rs182167415 | intron_variant,genic_upstream_transcript_variant                                      |
| rs182177565 | intron_variant,genic_upstream_transcript_variant                                      |
| rs182183650 | genic_downstream_transcript_variant,intron_variant                                    |
| rs182191423 | intron_variant                                                                        |
| rs182202951 | intron_variant                                                                        |
| rs182220935 | genic_downstream_transcript_variant,intron_variant                                    |
| rs182225931 | intron_variant                                                                        |

|             |                                                                                                   |
|-------------|---------------------------------------------------------------------------------------------------|
| rs182227689 | intron_variant                                                                                    |
| rs182228951 | intron_variant                                                                                    |
| rs182229643 | intron_variant,genic_upstream_transcript_variant                                                  |
| rs182236537 | genic_downstream_transcript_variant,intron_variant                                                |
| rs182237211 | intron_variant                                                                                    |
| rs182322573 | intron_variant,genic_upstream_transcript_variant                                                  |
| rs182337634 | intron_variant,genic_upstream_transcript_variant                                                  |
| rs182358752 | intron_variant,genic_upstream_transcript_variant                                                  |
| rs182371288 | intron_variant,genic_upstream_transcript_variant                                                  |
| rs182372249 | intron_variant,genic_upstream_transcript_variant                                                  |
| rs182384081 | intron_variant                                                                                    |
| rs182427854 | intron_variant                                                                                    |
| rs182430340 | intron_variant                                                                                    |
| rs182437939 | genic_downstream_transcript_variant,intron_variant                                                |
| rs182447735 | 5_prime_UTR_variant,intron_variant                                                                |
| rs182480559 | intron_variant                                                                                    |
| rs182483696 | intron_variant,genic_upstream_transcript_variant                                                  |
| rs182517414 | intron_variant,genic_upstream_transcript_variant                                                  |
| rs182722031 | intron_variant                                                                                    |
| rs182735227 | intron_variant                                                                                    |
| rs182744138 | upstream_transcript_variant,intron_variant,2KB_upstream_variant,genic_upstream_transcript_variant |
| rs182758855 | intron_variant,genic_upstream_transcript_variant                                                  |
| rs182774494 | intron_variant                                                                                    |
| rs182779243 | intron_variant                                                                                    |
| rs182796812 | intron_variant,genic_upstream_transcript_variant                                                  |
| rs182819705 | intron_variant                                                                                    |
| rs182850010 | genic_downstream_transcript_variant,intron_variant                                                |
| rs182851669 | intron_variant,genic_upstream_transcript_variant                                                  |
| rs182950182 | intron_variant,genic_upstream_transcript_variant                                                  |
| rs182951757 | intron_variant                                                                                    |
| rs182963802 | intron_variant                                                                                    |
| rs183004460 | genic_downstream_transcript_variant,intron_variant                                                |
| rs183010787 | intron_variant                                                                                    |
| rs183022486 | genic_downstream_transcript_variant,intron_variant,downstream_transcript_variant                  |
| rs183035736 | intron_variant,genic_upstream_transcript_variant                                                  |
| rs183047489 | genic_downstream_transcript_variant,intron_variant                                                |
| rs183060484 | genic_downstream_transcript_variant,intron_variant                                                |
| rs183129962 | genic_downstream_transcript_variant,intron_variant                                                |
| rs183153720 | intron_variant,genic_upstream_transcript_variant                                                  |
| rs183162565 | intron_variant                                                                                    |
| rs183169084 | intron_variant,genic_upstream_transcript_variant                                                  |
| rs183181798 | intron_variant                                                                                    |
| rs183186610 | intron_variant                                                                                    |
| rs183216472 | upstream_transcript_variant,intron_variant,2KB_upstream_variant,genic_upstream_transcript_variant |
| rs183224025 | upstream_transcript_variant,intron_variant,2KB_upstream_variant,genic_upstream_transcript_variant |
| rs183224935 | intron_variant,genic_upstream_transcript_variant                                                  |
| rs183273989 | intron_variant                                                                                    |
| rs183333487 | intron_variant,genic_upstream_transcript_variant                                                  |
| rs183338176 | genic_downstream_transcript_variant,intron_variant                                                |
| rs183360917 | intron_variant,genic_upstream_transcript_variant                                                  |
| rs183375652 | intron_variant                                                                                    |
| rs183417320 | intron_variant,genic_upstream_transcript_variant                                                  |
| rs183451765 | intron_variant,genic_upstream_transcript_variant                                                  |
| rs183452921 | intron_variant,genic_upstream_transcript_variant                                                  |
| rs183481059 | intron_variant                                                                                    |
| rs183559564 | intron_variant,genic_upstream_transcript_variant                                                  |
| rs183562083 | intron_variant,genic_upstream_transcript_variant                                                  |
| rs183564084 | intron_variant                                                                                    |
| rs183573710 | intron_variant                                                                                    |
| rs183578496 | intron_variant,genic_upstream_transcript_variant                                                  |
| rs183590950 | 500B_downstream_variant,downstream_transcript_variant                                             |
| rs183594343 | intron_variant,genic_upstream_transcript_variant                                                  |
| rs183609864 | intron_variant                                                                                    |
| rs183610924 | intron_variant,genic_upstream_transcript_variant                                                  |
| rs183628119 | intron_variant,genic_upstream_transcript_variant                                                  |
| rs183682632 | intron_variant,genic_upstream_transcript_variant                                                  |
| rs183685952 | genic_downstream_transcript_variant,intron_variant                                                |
| rs183710100 | intron_variant                                                                                    |
| rs183738503 | intron_variant                                                                                    |
| rs183744635 | genic_downstream_transcript_variant,intron_variant                                                |
| rs183750961 | genic_downstream_transcript_variant,intron_variant                                                |
| rs183788694 | intron_variant                                                                                    |
| rs183792760 | intron_variant                                                                                    |
| rs183834974 | intron_variant,genic_upstream_transcript_variant                                                  |

|             |                                                                                                   |
|-------------|---------------------------------------------------------------------------------------------------|
| rs183837517 | intron_variant,genic_upstream_transcript_variant                                                  |
| rs183838246 | intron_variant,genic_upstream_transcript_variant                                                  |
| rs183871547 | genic_downstream_transcript_variant,intron_variant                                                |
| rs183902418 | upstream_transcript_variant,intron_variant,2KB_upstream_variant,genic_upstream_transcript_variant |
| rs183952788 | intron_variant                                                                                    |
| rs184031477 | intron_variant                                                                                    |
| rs184036796 | intron_variant                                                                                    |
| rs184059396 | intron_variant,genic_upstream_transcript_variant                                                  |
| rs184064938 | intron_variant,genic_upstream_transcript_variant                                                  |
| rs184187476 | genic_downstream_transcript_variant,intron_variant                                                |
| rs184287586 | intron_variant                                                                                    |
| rs184292390 | genic_downstream_transcript_variant,intron_variant                                                |
| rs184325106 | intron_variant,genic_upstream_transcript_variant                                                  |
| rs184339266 | intron_variant                                                                                    |
| rs184340036 | genic_downstream_transcript_variant,intron_variant                                                |
| rs184342241 | intron_variant                                                                                    |
| rs184348578 | intron_variant                                                                                    |
| rs184354416 | genic_downstream_transcript_variant,intron_variant                                                |
| rs184359541 | genic_downstream_transcript_variant,intron_variant                                                |
| rs184378419 | intron_variant,genic_upstream_transcript_variant                                                  |
| rs184386794 | intron_variant                                                                                    |
| rs184396677 | genic_downstream_transcript_variant,intron_variant                                                |
| rs184424020 | genic_downstream_transcript_variant,intron_variant                                                |
| rs184428583 | intron_variant                                                                                    |
| rs184439568 | intron_variant,genic_upstream_transcript_variant                                                  |
| rs184452073 | intron_variant,genic_upstream_transcript_variant                                                  |
| rs184467506 | intron_variant                                                                                    |
| rs184508593 | genic_downstream_transcript_variant,intron_variant                                                |
| rs184512697 | intron_variant,genic_upstream_transcript_variant                                                  |
| rs184517571 | intron_variant,genic_upstream_transcript_variant                                                  |
| rs184522192 | intron_variant                                                                                    |
| rs184569469 | intron_variant,genic_upstream_transcript_variant                                                  |
| rs184571259 | intron_variant,genic_upstream_transcript_variant                                                  |
| rs184578449 | intron_variant                                                                                    |
| rs184586067 | genic_downstream_transcript_variant,intron_variant                                                |
| rs184587931 | intron_variant                                                                                    |
| rs184599757 | intron_variant,genic_upstream_transcript_variant                                                  |
| rs184618579 | intron_variant,genic_upstream_transcript_variant                                                  |
| rs184650918 | upstream_transcript_variant,intron_variant,2KB_upstream_variant,genic_upstream_transcript_variant |
| rs184684467 | intron_variant,genic_upstream_transcript_variant                                                  |
| rs184701203 | intron_variant,genic_upstream_transcript_variant                                                  |
| rs184815676 | intron_variant                                                                                    |
| rs184915956 | genic_downstream_transcript_variant,intron_variant                                                |
| rs184917798 | intron_variant                                                                                    |
| rs184984861 | genic_downstream_transcript_variant,intron_variant                                                |
| rs185019444 | intron_variant                                                                                    |
| rs185100233 | upstream_transcript_variant,intron_variant,2KB_upstream_variant,genic_upstream_transcript_variant |
| rs185122189 | genic_downstream_transcript_variant,intron_variant                                                |
| rs185141870 | intron_variant                                                                                    |
| rs185144153 | genic_downstream_transcript_variant,intron_variant                                                |
| rs185151194 | intron_variant                                                                                    |
| rs185196751 | intron_variant                                                                                    |
| rs185200665 | intron_variant,genic_upstream_transcript_variant                                                  |
| rs185264958 | intron_variant,genic_upstream_transcript_variant                                                  |
| rs185265967 | intron_variant,genic_upstream_transcript_variant                                                  |
| rs185274324 | intron_variant                                                                                    |
| rs185280303 | intron_variant                                                                                    |
| rs185283273 | intron_variant                                                                                    |
| rs185291452 | intron_variant,genic_upstream_transcript_variant                                                  |
| rs185316200 | intron_variant,genic_upstream_transcript_variant                                                  |
| rs185323698 | intron_variant,genic_upstream_transcript_variant                                                  |
| rs185323853 | intron_variant,genic_upstream_transcript_variant                                                  |
| rs185442020 | intron_variant,genic_upstream_transcript_variant                                                  |
| rs185454881 | intron_variant,genic_upstream_transcript_variant                                                  |
| rs185539839 | intron_variant                                                                                    |
| rs185557707 | intron_variant,genic_upstream_transcript_variant                                                  |
| rs185579541 | intron_variant                                                                                    |
| rs185580081 | intron_variant,genic_upstream_transcript_variant                                                  |
| rs185586013 | intron_variant                                                                                    |
| rs185596181 | genic_downstream_transcript_variant,intron_variant                                                |
| rs185611591 | intron_variant,genic_upstream_transcript_variant                                                  |
| rs185613765 | intron_variant                                                                                    |
| rs185789054 | intron_variant                                                                                    |
| rs185799332 | genic_downstream_transcript_variant,intron_variant                                                |

|             |                                                                                                   |
|-------------|---------------------------------------------------------------------------------------------------|
| rs185822587 | intron_variant                                                                                    |
| rs185823960 | genic_downstream_transcript_variant,intron_variant                                                |
| rs185824789 | intron_variant                                                                                    |
| rs185828988 | intron_variant,genic_upstream_transcript_variant                                                  |
| rs185831140 | intron_variant                                                                                    |
| rs185836885 | genic_downstream_transcript_variant,intron_variant                                                |
| rs185859315 | intron_variant,genic_upstream_transcript_variant                                                  |
| rs185874674 | intron_variant,genic_upstream_transcript_variant                                                  |
| rs185874979 | intron_variant,genic_upstream_transcript_variant                                                  |
| rs185881048 | intron_variant                                                                                    |
| rs185915651 | intron_variant                                                                                    |
| rs185929204 | intron_variant,genic_upstream_transcript_variant                                                  |
| rs185931949 | intron_variant                                                                                    |
| rs185974584 | intron_variant,genic_upstream_transcript_variant                                                  |
| rs186031932 | intron_variant                                                                                    |
| rs186037588 | upstream_transcript_variant,intron_variant,2KB_upstream_variant,genic_upstream_transcript_variant |
| rs186052051 | genic_downstream_transcript_variant,intron_variant                                                |
| rs186107741 | intron_variant,genic_upstream_transcript_variant                                                  |
| rs186145433 | intron_variant                                                                                    |
| rs186153186 | genic_downstream_transcript_variant,intron_variant                                                |
| rs186174347 | intron_variant                                                                                    |
| rs186178894 | genic_downstream_transcript_variant,intron_variant                                                |
| rs186375389 | intron_variant,genic_upstream_transcript_variant                                                  |
| rs186462523 | intron_variant                                                                                    |
| rs186469831 | intron_variant                                                                                    |
| rs186475635 | genic_downstream_transcript_variant,intron_variant                                                |
| rs186482548 | intron_variant,genic_upstream_transcript_variant                                                  |
| rs186489621 | intron_variant,genic_upstream_transcript_variant                                                  |
| rs186494385 | intron_variant,genic_upstream_transcript_variant                                                  |
| rs186496275 | intron_variant,genic_upstream_transcript_variant                                                  |
| rs186521391 | intron_variant,genic_upstream_transcript_variant                                                  |
| rs186521516 | intron_variant                                                                                    |
| rs186531870 | intron_variant                                                                                    |
| rs186533526 | intron_variant,genic_upstream_transcript_variant                                                  |
| rs186553329 | intron_variant,genic_upstream_transcript_variant                                                  |
| rs186576712 | genic_downstream_transcript_variant,intron_variant                                                |
| rs186583408 | genic_downstream_transcript_variant,intron_variant                                                |
| rs186669569 | intron_variant,genic_upstream_transcript_variant                                                  |
| rs186698354 | intron_variant                                                                                    |
| rs186703671 | intron_variant,genic_upstream_transcript_variant                                                  |
| rs186724809 | intron_variant,genic_upstream_transcript_variant                                                  |
| rs186725197 | intron_variant                                                                                    |
| rs186739631 | intron_variant,genic_upstream_transcript_variant                                                  |
| rs186742019 | intron_variant                                                                                    |
| rs186747779 | intron_variant,genic_upstream_transcript_variant                                                  |
| rs186774701 | intron_variant,genic_upstream_transcript_variant                                                  |
| rs186809804 | intron_variant                                                                                    |
| rs186853335 | intron_variant                                                                                    |
| rs186856609 | intron_variant                                                                                    |
| rs186945227 | intron_variant,genic_upstream_transcript_variant                                                  |
| rs186990910 | intron_variant,genic_upstream_transcript_variant                                                  |
| rs187042844 | intron_variant                                                                                    |
| rs187051097 | intron_variant,genic_upstream_transcript_variant                                                  |
| rs187058025 | genic_downstream_transcript_variant,intron_variant                                                |
| rs187060407 | intron_variant,genic_upstream_transcript_variant                                                  |
| rs187110456 | intron_variant,genic_upstream_transcript_variant                                                  |
| rs187149837 | intron_variant,genic_upstream_transcript_variant                                                  |
| rs187315452 | genic_downstream_transcript_variant,intron_variant,downstream_transcript_variant                  |
| rs187317333 | intron_variant                                                                                    |
| rs187338174 | genic_downstream_transcript_variant,intron_variant                                                |
| rs187340553 | intron_variant                                                                                    |
| rs187342158 | intron_variant                                                                                    |
| rs187350432 | intron_variant                                                                                    |
| rs187352390 | genic_downstream_transcript_variant,intron_variant                                                |
| rs187353241 | intron_variant                                                                                    |
| rs187367634 | intron_variant                                                                                    |
| rs187380750 | genic_downstream_transcript_variant,intron_variant                                                |
| rs187384576 | genic_downstream_transcript_variant,intron_variant                                                |
| rs187389410 | intron_variant,genic_upstream_transcript_variant                                                  |
| rs187390486 | intron_variant,genic_upstream_transcript_variant                                                  |
| rs187390709 | intron_variant                                                                                    |
| rs187481429 | genic_downstream_transcript_variant,intron_variant                                                |
| rs187560434 | intron_variant                                                                                    |
| rs187576681 | intron_variant                                                                                    |

|             |                                                                                                   |
|-------------|---------------------------------------------------------------------------------------------------|
| rs187584067 | upstream_transcript_variant,intron_variant,2KB_upstream_variant,genic_upstream_transcript_variant |
| rs187598219 | intron_variant,genic_upstream_transcript_variant                                                  |
| rs187598616 | upstream_transcript_variant,intron_variant,2KB_upstream_variant,genic_upstream_transcript_variant |
| rs187607500 | intron_variant,genic_upstream_transcript_variant                                                  |
| rs187628434 | intron_variant                                                                                    |
| rs187658561 | intron_variant                                                                                    |
| rs187779339 | genic_downstream_transcript_variant,intron_variant                                                |
| rs187911662 | intron_variant                                                                                    |
| rs187917758 | genic_downstream_transcript_variant,intron_variant                                                |
| rs187921256 | genic_downstream_transcript_variant,intron_variant                                                |
| rs187922867 | intron_variant,genic_upstream_transcript_variant                                                  |
| rs187950675 | intron_variant                                                                                    |
| rs187952940 | intron_variant,genic_upstream_transcript_variant                                                  |
| rs188000596 | upstream_transcript_variant,intron_variant,2KB_upstream_variant,genic_upstream_transcript_variant |
| rs188092770 | intron_variant,genic_upstream_transcript_variant                                                  |
| rs188098558 | intron_variant,genic_upstream_transcript_variant                                                  |
| rs188109475 | intron_variant,genic_upstream_transcript_variant                                                  |
| rs188149889 | genic_downstream_transcript_variant,intron_variant                                                |
| rs188154452 | intron_variant                                                                                    |
| rs188169600 | genic_downstream_transcript_variant,intron_variant                                                |
| rs188174496 | upstream_transcript_variant,intron_variant,genic_upstream_transcript_variant                      |
| rs188176286 | intron_variant                                                                                    |
| rs188194441 | intron_variant                                                                                    |
| rs188202245 | intron_variant,genic_upstream_transcript_variant                                                  |
| rs188257776 | genic_downstream_transcript_variant,intron_variant                                                |
| rs188365840 | upstream_transcript_variant,intron_variant,2KB_upstream_variant,genic_upstream_transcript_variant |
| rs188382413 | intron_variant                                                                                    |
| rs188442041 | intron_variant,genic_upstream_transcript_variant                                                  |
| rs188443459 | intron_variant,genic_upstream_transcript_variant                                                  |
| rs188453969 | genic_downstream_transcript_variant,intron_variant                                                |
| rs188487065 | intron_variant                                                                                    |
| rs188505702 | intron_variant                                                                                    |
| rs188580437 | intron_variant                                                                                    |
| rs188581602 | intron_variant                                                                                    |
| rs188584574 | intron_variant,genic_upstream_transcript_variant                                                  |
| rs188589350 | genic_downstream_transcript_variant,intron_variant                                                |
| rs188590680 | genic_downstream_transcript_variant,intron_variant                                                |
| rs188591194 | genic_downstream_transcript_variant,intron_variant                                                |
| rs188602755 | intron_variant,genic_upstream_transcript_variant                                                  |
| rs188611134 | intron_variant                                                                                    |
| rs188625229 | intron_variant,genic_upstream_transcript_variant                                                  |
| rs188625460 | intron_variant                                                                                    |
| rs188701834 | intron_variant                                                                                    |
| rs188710120 | intron_variant                                                                                    |
| rs188721542 | intron_variant,genic_upstream_transcript_variant                                                  |
| rs188724450 | genic_downstream_transcript_variant,intron_variant                                                |
| rs188731635 | intron_variant,genic_upstream_transcript_variant                                                  |
| rs188798273 | intron_variant                                                                                    |
| rs188804282 | intron_variant                                                                                    |
| rs188824621 | intron_variant,genic_upstream_transcript_variant                                                  |
| rs188828405 | intron_variant,genic_upstream_transcript_variant                                                  |
| rs188835223 | genic_downstream_transcript_variant,intron_variant                                                |
| rs188839163 | intron_variant                                                                                    |
| rs188839217 | genic_downstream_transcript_variant,intron_variant                                                |
| rs188852840 | intron_variant,genic_upstream_transcript_variant                                                  |
| rs188873275 | intron_variant,genic_upstream_transcript_variant                                                  |
| rs188877694 | intron_variant,genic_upstream_transcript_variant                                                  |
| rs188953277 | intron_variant                                                                                    |
| rs188965473 | intron_variant                                                                                    |
| rs188970221 | genic_downstream_transcript_variant,intron_variant                                                |
| rs188983319 | intron_variant,genic_upstream_transcript_variant                                                  |
| rs188993740 | intron_variant,genic_upstream_transcript_variant                                                  |
| rs188993773 | intron_variant                                                                                    |
| rs188998817 | intron_variant,genic_upstream_transcript_variant                                                  |
| rs189048908 | intron_variant                                                                                    |
| rs189209962 | genic_downstream_transcript_variant,intron_variant                                                |
| rs189232404 | intron_variant                                                                                    |
| rs189240181 | intron_variant                                                                                    |
| rs189242797 | genic_downstream_transcript_variant,intron_variant                                                |
| rs189253889 | genic_downstream_transcript_variant,intron_variant                                                |
| rs189261959 | intron_variant,genic_upstream_transcript_variant                                                  |
| rs189269316 | intron_variant,genic_upstream_transcript_variant                                                  |
| rs189269601 | intron_variant                                                                                    |
| rs189272965 | intron_variant                                                                                    |

|             |                                                                                                            |
|-------------|------------------------------------------------------------------------------------------------------------|
| rs189300335 | intron_variant,genic_upstream_transcript_variant                                                           |
| rs189343414 | genic_downstream_transcript_variant,intron_variant                                                         |
| rs189441404 | intron_variant,genic_upstream_transcript_variant                                                           |
| rs189483394 | intron_variant                                                                                             |
| rs189496481 | intron_variant,genic_upstream_transcript_variant                                                           |
| rs189500122 | intron_variant,genic_upstream_transcript_variant                                                           |
| rs189511032 | intron_variant,genic_upstream_transcript_variant                                                           |
| rs189548541 | intron_variant,genic_downstream_transcript_variant                                                         |
| rs189587519 | intron_variant                                                                                             |
| rs189603147 | intron_variant                                                                                             |
| rs189734950 | intron_variant,genic_upstream_transcript_variant                                                           |
| rs189744686 | intron_variant,genic_upstream_transcript_variant                                                           |
| rs189745349 | intron_variant,genic_upstream_transcript_variant                                                           |
| rs189762447 | intron_variant                                                                                             |
| rs189763247 | intron_variant                                                                                             |
| rs189802564 | intron_variant,genic_upstream_transcript_variant                                                           |
| rs189810227 | coding_sequence_variant,non_coding_transcript_variant,genic_downstream_transcript_variant,missense_variant |
| rs189814561 | intron_variant,genic_upstream_transcript_variant                                                           |
| rs189840637 | intron_variant                                                                                             |
| rs189850806 | intron_variant                                                                                             |
| rs189861057 | intron_variant,genic_downstream_transcript_variant                                                         |
| rs189862274 | intron_variant,genic_downstream_transcript_variant                                                         |
| rs189874389 | intron_variant,genic_downstream_transcript_variant                                                         |
| rs189879523 | intron_variant                                                                                             |
| rs190002206 | intron_variant                                                                                             |
| rs190002377 | intron_variant,genic_upstream_transcript_variant                                                           |
| rs190008103 | intron_variant,genic_upstream_transcript_variant                                                           |
| rs190049498 | intron_variant,genic_upstream_transcript_variant                                                           |
| rs190056562 | intron_variant,genic_downstream_transcript_variant                                                         |
| rs190081449 | intron_variant,genic_upstream_transcript_variant                                                           |
| rs190087766 | intron_variant                                                                                             |
| rs190096557 | intron_variant                                                                                             |
| rs190096796 | intron_variant,genic_upstream_transcript_variant                                                           |
| rs190100786 | intron_variant                                                                                             |
| rs190109578 | intron_variant                                                                                             |
| rs190119214 | intron_variant                                                                                             |
| rs190138665 | intron_variant,genic_upstream_transcript_variant                                                           |
| rs190144620 | intron_variant                                                                                             |
| rs190271021 | intron_variant,genic_upstream_transcript_variant                                                           |
| rs190300865 | intron_variant,genic_downstream_transcript_variant                                                         |
| rs190373292 | intron_variant,genic_downstream_transcript_variant                                                         |
| rs190384648 | intron_variant,genic_upstream_transcript_variant                                                           |
| rs190417625 | intron_variant                                                                                             |
| rs190553891 | intron_variant                                                                                             |
| rs190577791 | intron_variant,genic_upstream_transcript_variant                                                           |
| rs190645639 | intron_variant,genic_upstream_transcript_variant                                                           |
| rs190647436 | intron_variant                                                                                             |
| rs190676713 | intron_variant,genic_downstream_transcript_variant                                                         |
| rs190679682 | intron_variant,genic_upstream_transcript_variant                                                           |
| rs190785973 | intron_variant,genic_upstream_transcript_variant                                                           |
| rs190809443 | intron_variant                                                                                             |
| rs190895070 | intron_variant,genic_downstream_transcript_variant                                                         |
| rs190896373 | intron_variant                                                                                             |
| rs190902809 | intron_variant,genic_upstream_transcript_variant                                                           |
| rs190909279 | intron_variant,genic_downstream_transcript_variant                                                         |
| rs190942459 | intron_variant,genic_upstream_transcript_variant                                                           |
| rs190947831 | intron_variant,genic_upstream_transcript_variant                                                           |
| rs190987423 | intron_variant,genic_downstream_transcript_variant                                                         |
| rs191015255 | intron_variant,genic_upstream_transcript_variant                                                           |
| rs191019243 | intron_variant                                                                                             |
| rs191023329 | intron_variant,genic_downstream_transcript_variant                                                         |
| rs191030851 | intron_variant                                                                                             |
| rs191043034 | intron_variant,genic_downstream_transcript_variant                                                         |
| rs191060445 | intron_variant,genic_upstream_transcript_variant                                                           |
| rs191064598 | 2KB_upstream_variant,upstream_transcript_variant,intron_variant,genic_upstream_transcript_variant          |
| rs191068881 | genic_downstream_transcript_variant,non_coding_transcript_variant,3_prime_UTR_variant                      |
| rs191070842 | 2KB_upstream_variant,upstream_transcript_variant,intron_variant,genic_upstream_transcript_variant          |
| rs191083829 | intron_variant                                                                                             |
| rs191095511 | intron_variant,genic_upstream_transcript_variant                                                           |
| rs191147850 | intron_variant,genic_downstream_transcript_variant                                                         |
| rs191148707 | intron_variant,genic_upstream_transcript_variant                                                           |
| rs191202336 | 2KB_upstream_variant,upstream_transcript_variant,intron_variant,genic_upstream_transcript_variant          |
| rs191268392 | intron_variant,genic_downstream_transcript_variant                                                         |
| rs191324212 | intron_variant,genic_upstream_transcript_variant                                                           |

|             |                                                                                                   |
|-------------|---------------------------------------------------------------------------------------------------|
| rs191344711 | intron_variant                                                                                    |
| rs191414839 | intron_variant,genic_upstream_transcript_variant                                                  |
| rs191422903 | intron_variant,genic_upstream_transcript_variant                                                  |
| rs191429758 | intron_variant                                                                                    |
| rs191438754 | intron_variant,genic_downstream_transcript_variant                                                |
| rs191439857 | intron_variant,genic_upstream_transcript_variant                                                  |
| rs191481021 | intron_variant,genic_upstream_transcript_variant                                                  |
| rs191498755 | intron_variant                                                                                    |
| rs191593694 | intron_variant,genic_upstream_transcript_variant                                                  |
| rs191600071 | intron_variant                                                                                    |
| rs191605951 | intron_variant,genic_downstream_transcript_variant                                                |
| rs191622610 | intron_variant,genic_downstream_transcript_variant                                                |
| rs191640048 | intron_variant,genic_downstream_transcript_variant                                                |
| rs191690926 | intron_variant,genic_upstream_transcript_variant                                                  |
| rs191707300 | intron_variant                                                                                    |
| rs191717411 | intron_variant                                                                                    |
| rs191800706 | intron_variant,genic_upstream_transcript_variant                                                  |
| rs191800900 | intron_variant,genic_upstream_transcript_variant                                                  |
| rs191833020 | intron_variant,genic_downstream_transcript_variant                                                |
| rs191851036 | intron_variant                                                                                    |
| rs191857662 | intron_variant                                                                                    |
| rs191860708 | intron_variant                                                                                    |
| rs191884083 | intron_variant,genic_upstream_transcript_variant                                                  |
| rs191903304 | intron_variant                                                                                    |
| rs191965531 | intron_variant                                                                                    |
| rs191982888 | intron_variant                                                                                    |
| rs192005782 | 2KB_upstream_variant,upstream_transcript_variant,intron_variant,genic_upstream_transcript_variant |
| rs192018711 | intron_variant,genic_downstream_transcript_variant                                                |
| rs192030136 | intron_variant,genic_upstream_transcript_variant                                                  |
| rs192203349 | intron_variant                                                                                    |
| rs192225324 | intron_variant,genic_upstream_transcript_variant                                                  |
| rs192268529 | intron_variant                                                                                    |
| rs192289298 | intron_variant,genic_upstream_transcript_variant                                                  |
| rs192293739 | intron_variant                                                                                    |
| rs192296541 | intron_variant,genic_downstream_transcript_variant                                                |
| rs192298985 | intron_variant                                                                                    |
| rs192309281 | intron_variant                                                                                    |
| rs192328198 | intron_variant                                                                                    |
| rs192335540 | intron_variant                                                                                    |
| rs192340739 | intron_variant,genic_downstream_transcript_variant                                                |
| rs192344311 | intron_variant,genic_downstream_transcript_variant                                                |
| rs192345064 | intron_variant,genic_upstream_transcript_variant                                                  |
| rs192365606 | intron_variant,genic_downstream_transcript_variant                                                |
| rs192424541 | intron_variant                                                                                    |
| rs192428094 | intron_variant                                                                                    |
| rs192447663 | intron_variant,genic_upstream_transcript_variant                                                  |
| rs192448217 | intron_variant,genic_downstream_transcript_variant                                                |
| rs192456832 | intron_variant,genic_upstream_transcript_variant                                                  |
| rs192480608 | intron_variant,genic_upstream_transcript_variant                                                  |
| rs192519414 | intron_variant,genic_upstream_transcript_variant                                                  |
| rs192521576 | intron_variant,genic_upstream_transcript_variant                                                  |
| rs192530910 | intron_variant,genic_downstream_transcript_variant                                                |
| rs192578133 | intron_variant                                                                                    |
| rs192586871 | intron_variant,genic_upstream_transcript_variant                                                  |
| rs192587052 | intron_variant,genic_upstream_transcript_variant                                                  |
| rs192590250 | intron_variant                                                                                    |
| rs192600901 | intron_variant,genic_downstream_transcript_variant                                                |
| rs192669437 | intron_variant,genic_upstream_transcript_variant                                                  |
| rs192687135 | intron_variant                                                                                    |
| rs192703787 | 2KB_upstream_variant,upstream_transcript_variant,intron_variant,genic_upstream_transcript_variant |
| rs192714031 | intron_variant                                                                                    |
| rs192730265 | intron_variant,genic_upstream_transcript_variant                                                  |
| rs192771581 | intron_variant,genic_downstream_transcript_variant                                                |
| rs192775415 | intron_variant                                                                                    |
| rs192897975 | intron_variant                                                                                    |
| rs192907924 | intron_variant,genic_upstream_transcript_variant                                                  |
| rs192918959 | intron_variant,genic_upstream_transcript_variant                                                  |
| rs192965555 | intron_variant,genic_upstream_transcript_variant                                                  |
| rs192974833 | intron_variant,genic_upstream_transcript_variant                                                  |
| rs193015869 | intron_variant,genic_downstream_transcript_variant                                                |
| rs193082291 | intron_variant                                                                                    |
| rs193094079 | intron_variant,genic_upstream_transcript_variant                                                  |
| rs193095029 | intron_variant,genic_upstream_transcript_variant                                                  |
| rs193098192 | intron_variant,genic_upstream_transcript_variant                                                  |

|             |                                                                                                                           |
|-------------|---------------------------------------------------------------------------------------------------------------------------|
| rs193114393 | intron_variant,genic_downstream_transcript_variant                                                                        |
| rs193124340 | intron_variant                                                                                                            |
| rs193182346 | intron_variant                                                                                                            |
| rs193189509 | intron_variant,genic_upstream_transcript_variant                                                                          |
| rs193198366 | intron_variant,genic_downstream_transcript_variant                                                                        |
| rs193242530 | intron_variant                                                                                                            |
| rs193246342 | intron_variant                                                                                                            |
| rs193248311 | intron_variant,genic_upstream_transcript_variant                                                                          |
| rs193255597 | intron_variant,genic_upstream_transcript_variant                                                                          |
| rs193265846 | intron_variant                                                                                                            |
| rs199504586 | intron_variant,splice_acceptor_variant                                                                                    |
| rs199549757 | coding_sequence_variant,synonymous_variant,non_coding_transcript_variant                                                  |
| rs199583656 | intron_variant                                                                                                            |
| rs199595181 | missense_variant,coding_sequence_variant,intron_variant,genic_upstream_transcript_variant,non_coding_transcript_variant   |
| rs199599793 | intron_variant                                                                                                            |
| rs199599833 | coding_sequence_variant,synonymous_variant,non_coding_transcript_variant,genic_downstream_transcript_variant              |
| rs199609454 | intron_variant                                                                                                            |
| rs199661959 | intron_variant,genic_upstream_transcript_variant                                                                          |
| rs199685502 | intron_variant                                                                                                            |
| rs199701456 | coding_sequence_variant,synonymous_variant,non_coding_transcript_variant,genic_downstream_transcript_variant              |
| rs199705069 | coding_sequence_variant,synonymous_variant,non_coding_transcript_variant                                                  |
| rs199718542 | intron_variant,genic_upstream_transcript_variant                                                                          |
| rs199760475 | intron_variant                                                                                                            |
| rs199761112 | intron_variant                                                                                                            |
| rs199808716 | coding_sequence_variant,intron_variant,missense_variant                                                                   |
| rs199810399 | intron_variant,genic_upstream_transcript_variant                                                                          |
| rs199812384 | coding_sequence_variant,synonymous_variant,intron_variant,genic_upstream_transcript_variant,non_coding_transcript_variant |
| rs199846233 | intron_variant,genic_upstream_transcript_variant                                                                          |
| rs199867668 | intron_variant,genic_downstream_transcript_variant                                                                        |
| rs199897137 | intron_variant,genic_upstream_transcript_variant                                                                          |
| rs199898841 | coding_sequence_variant,synonymous_variant,intron_variant,genic_upstream_transcript_variant,non_coding_transcript_variant |
| rs199899286 | intron_variant                                                                                                            |
| rs199918721 | intron_variant                                                                                                            |
| rs199930636 | intron_variant,genic_upstream_transcript_variant                                                                          |
| rs199941443 | downstream_transcript_variant,intron_variant,genic_downstream_transcript_variant                                          |
| rs199951038 | intron_variant,genic_upstream_transcript_variant                                                                          |
| rs199962199 | intron_variant                                                                                                            |
| rs200000704 | coding_sequence_variant,synonymous_variant,non_coding_transcript_variant                                                  |
| rs200022810 | intron_variant                                                                                                            |
| rs200023903 | missense_variant,coding_sequence_variant,intron_variant,genic_upstream_transcript_variant,non_coding_transcript_variant   |
| rs200041888 | intron_variant                                                                                                            |
| rs200113917 | intron_variant,genic_upstream_transcript_variant                                                                          |
| rs200138825 | coding_sequence_variant,synonymous_variant,non_coding_transcript_variant,genic_downstream_transcript_variant              |
| rs200147283 | intron_variant,genic_upstream_transcript_variant                                                                          |
| rs200147795 | intron_variant                                                                                                            |
| rs200157445 | intron_variant,genic_upstream_transcript_variant                                                                          |
| rs200160046 | intron_variant                                                                                                            |
| rs200184140 | coding_sequence_variant,synonymous_variant,non_coding_transcript_variant,genic_downstream_transcript_variant              |
| rs200209903 | intron_variant,genic_upstream_transcript_variant                                                                          |
| rs200210428 | coding_sequence_variant,synonymous_variant,non_coding_transcript_variant                                                  |
| rs200260902 | intron_variant                                                                                                            |
| rs200269358 | coding_sequence_variant,non_coding_transcript_variant,missense_variant                                                    |
| rs200280369 | intron_variant                                                                                                            |
| rs200287865 | intron_variant,genic_downstream_transcript_variant                                                                        |
| rs200318158 | intron_variant,genic_downstream_transcript_variant                                                                        |
| rs200327980 | intron_variant,genic_upstream_transcript_variant                                                                          |
| rs200334747 | intron_variant                                                                                                            |
| rs200340066 | coding_sequence_variant,synonymous_variant,non_coding_transcript_variant,genic_downstream_transcript_variant              |
| rs200341323 | coding_sequence_variant,synonymous_variant,non_coding_transcript_variant,missense_variant                                 |
| rs200350112 | upstream_transcript_variant,intron_variant,genic_upstream_transcript_variant                                              |
| rs200397535 | intron_variant,genic_downstream_transcript_variant                                                                        |
| rs200400404 | intron_variant,genic_upstream_transcript_variant                                                                          |
| rs200403115 | coding_sequence_variant,synonymous_variant,non_coding_transcript_variant,5_prime_UTR_variant                              |
| rs200456335 | coding_sequence_variant,synonymous_variant,non_coding_transcript_variant,genic_downstream_transcript_variant              |
| rs200457637 | intron_variant                                                                                                            |
| rs200472537 | coding_sequence_variant,synonymous_variant,intron_variant,genic_upstream_transcript_variant,non_coding_transcript_variant |
| rs200487706 | intron_variant,genic_upstream_transcript_variant                                                                          |
| rs200573684 | genic_downstream_transcript_variant,non_coding_transcript_variant,3_prime_UTR_variant                                     |
| rs200576657 | intron_variant                                                                                                            |
| rs200582093 | coding_sequence_variant,synonymous_variant,non_coding_transcript_variant                                                  |
| rs200584971 | intron_variant                                                                                                            |
| rs200592302 | intron_variant,genic_upstream_transcript_variant                                                                          |
| rs200599512 | intron_variant                                                                                                            |
| rs200635057 | intron_variant                                                                                                            |

|             |                                                                                                                               |
|-------------|-------------------------------------------------------------------------------------------------------------------------------|
| rs200641198 | coding_sequence_variant,synonymous_variant,intron_variant,genic_upstream_transcript_variant,non_coding_transcript_variant     |
| rs200644032 | intron_variant,genic_upstream_transcript_variant                                                                              |
| rs200666523 | intron_variant                                                                                                                |
| rs200692617 | coding_sequence_variant,synonymous_variant,non_coding_transcript_variant,genic_downstream_transcript_variant                  |
| rs200725302 | intron_variant,genic_downstream_transcript_variant                                                                            |
| rs200739117 | intron_variant,genic_upstream_transcript_variant                                                                              |
| rs200752283 | intron_variant                                                                                                                |
| rs200806817 | coding_sequence_variant,synonymous_variant,non_coding_transcript_variant                                                      |
| rs200862535 | intron_variant,genic_downstream_transcript_variant                                                                            |
| rs200865756 | coding_sequence_variant,synonymous_variant,non_coding_transcript_variant,5_prime_UTR_variant                                  |
| rs200911694 | intron_variant,genic_upstream_transcript_variant                                                                              |
| rs200939415 | coding_sequence_variant,synonymous_variant,intron_variant,genic_upstream_transcript_variant,non_coding_transcript_variant     |
| rs200945141 | intron_variant,genic_upstream_transcript_variant                                                                              |
| rs200992812 | intron_variant,genic_upstream_transcript_variant                                                                              |
| rs201027191 | intron_variant,genic_upstream_transcript_variant                                                                              |
| rs201044498 | intron_variant,genic_downstream_transcript_variant                                                                            |
| rs201079941 | downstream_transcript_variant,intron_variant,genic_downstream_transcript_variant                                              |
| rs201090828 | coding_sequence_variant,non_coding_transcript_variant,missense_variant                                                        |
| rs201109546 | coding_sequence_variant,synonymous_variant,intron_variant,genic_upstream_transcript_variant,non_coding_transcript_variant     |
| rs201147646 | coding_sequence_variant,synonymous_variant,non_coding_transcript_variant,genic_downstream_transcript_variant                  |
| rs201181441 | coding_sequence_variant,synonymous_variant,non_coding_transcript_variant,5_prime_UTR_variant                                  |
| rs201184739 | intron_variant                                                                                                                |
| rs201186420 | intron_variant                                                                                                                |
| rs201223702 | intron_variant,genic_upstream_transcript_variant                                                                              |
| rs201228499 | intron_variant,genic_upstream_transcript_variant                                                                              |
| rs201241099 | intron_variant,genic_upstream_transcript_variant                                                                              |
| rs201258917 | coding_sequence_variant,synonymous_variant,intron_variant,genic_upstream_transcript_variant,non_coding_transcript_variant     |
| rs201287489 | intron_variant,genic_upstream_transcript_variant                                                                              |
| rs201302437 | intron_variant,genic_upstream_transcript_variant                                                                              |
| rs201319905 | intron_variant                                                                                                                |
| rs201323678 | intron_variant                                                                                                                |
| rs201326561 | coding_sequence_variant,synonymous_variant,non_coding_transcript_variant                                                      |
| rs201348724 | intron_variant,genic_upstream_transcript_variant                                                                              |
| rs201369312 | intron_variant,genic_upstream_transcript_variant                                                                              |
| rs201378674 | coding_sequence_variant,synonymous_variant,non_coding_transcript_variant                                                      |
| rs201395418 | intron_variant                                                                                                                |
| rs201419562 | intron_variant                                                                                                                |
| rs201419910 | coding_sequence_variant,synonymous_variant,non_coding_transcript_variant,genic_downstream_transcript_variant                  |
| rs201458828 | intron_variant                                                                                                                |
| rs201463173 | intron_variant                                                                                                                |
| rs201491944 | intron_variant                                                                                                                |
| rs201495740 | intron_variant                                                                                                                |
| rs201500347 | intron_variant                                                                                                                |
| rs201530909 | intron_variant                                                                                                                |
| rs201551341 | intron_variant,genic_upstream_transcript_variant                                                                              |
| rs201551961 | coding_sequence_variant,synonymous_variant,non_coding_transcript_variant                                                      |
| rs201603404 | intron_variant,genic_upstream_transcript_variant                                                                              |
| rs201633919 | intron_variant,genic_downstream_transcript_variant                                                                            |
| rs201634868 | intron_variant                                                                                                                |
| rs201699105 | intron_variant,genic_upstream_transcript_variant                                                                              |
| rs201724557 | intron_variant                                                                                                                |
| rs201726372 | intron_variant,genic_downstream_transcript_variant                                                                            |
| rs201747580 | coding_sequence_variant,synonymous_variant,non_coding_transcript_variant,genic_downstream_transcript_variant                  |
| rs201770887 | intron_variant,genic_upstream_transcript_variant                                                                              |
| rs201815666 | coding_sequence_variant,synonymous_variant,non_coding_transcript_variant,genic_downstream_transcript_variant                  |
| rs201825443 | intron_variant,genic_upstream_transcript_variant                                                                              |
| rs201829409 | intron_variant,genic_downstream_transcript_variant                                                                            |
| rs201882845 | coding_sequence_variant,synonymous_variant,non_coding_transcript_variant                                                      |
| rs201929141 | intron_variant                                                                                                                |
| rs201935135 | intron_variant                                                                                                                |
| rs201939285 | intron_variant                                                                                                                |
| rs201945798 | coding_sequence_variant,synonymous_variant,intron_variant,genic_upstream_transcript_variant,non_coding_transcript_variant     |
| rs201951536 | intron_variant                                                                                                                |
| rs201975734 | intron_variant                                                                                                                |
| rs201997422 | coding_sequence_variant,synonymous_variant,non_coding_transcript_variant,genic_downstream_transcript_variant                  |
| rs202016698 | intron_variant                                                                                                                |
| rs202049553 | intron_variant,genic_upstream_transcript_variant                                                                              |
| rs202065067 | coding_sequence_variant,synonymous_variant,non_coding_transcript_variant,genic_downstream_transcript_variant                  |
| rs202086515 | intron_variant,genic_downstream_transcript_variant                                                                            |
| rs202097954 | intron_variant                                                                                                                |
| rs202110450 | missense_variant,coding_sequence_variant,synonymous_variant,non_coding_transcript_variant,genic_downstream_transcript_variant |
| rs202113885 | intron_variant,genic_upstream_transcript_variant                                                                              |
| rs202135726 | coding_sequence_variant,non_coding_transcript_variant,missense_variant                                                        |
| rs202165096 | intron_variant,genic_upstream_transcript_variant                                                                              |

|             |                                                                                                                           |
|-------------|---------------------------------------------------------------------------------------------------------------------------|
| rs202168939 | intron_variant                                                                                                            |
| rs202198336 | coding_sequence_variant,synonymous_variant,non_coding_transcript_variant                                                  |
| rs202213085 | intron_variant                                                                                                            |
| rs202214034 | intron_variant                                                                                                            |
| rs202215501 | intron_variant                                                                                                            |
| rs202229900 | intron_variant,genic_downstream_transcript_variant                                                                        |
| rs202236031 | 5_prime_UTR_variant,missense_variant,coding_sequence_variant,synonymous_variant,non_coding_transcript_variant             |
| rs207468445 | intron_variant,genic_upstream_transcript_variant                                                                          |
| rs207468446 | intron_variant                                                                                                            |
| rs267601244 | coding_sequence_variant,non_coding_transcript_variant,genic_downstream_transcript_variant,missense_variant                |
| rs367595475 | intron_variant,genic_upstream_transcript_variant                                                                          |
| rs367611023 | intron_variant,genic_upstream_transcript_variant                                                                          |
| rs367649400 | coding_sequence_variant,intron_variant,missense_variant                                                                   |
| rs367709280 | intron_variant,genic_upstream_transcript_variant                                                                          |
| rs367710867 | upstream_transcript_variant,intron_variant,genic_upstream_transcript_variant                                              |
| rs367711750 | intron_variant,genic_downstream_transcript_variant                                                                        |
| rs367722737 | missense_variant,coding_sequence_variant,intron_variant,genic_upstream_transcript_variant,non_coding_transcript_variant   |
| rs367723888 | intron_variant                                                                                                            |
| rs367734724 | intron_variant                                                                                                            |
| rs367751541 | intron_variant                                                                                                            |
| rs367772588 | coding_sequence_variant,synonymous_variant,non_coding_transcript_variant,genic_downstream_transcript_variant              |
| rs367981289 | intron_variant                                                                                                            |
| rs368000670 | intron_variant,genic_upstream_transcript_variant                                                                          |
| rs368003053 | intron_variant,genic_upstream_transcript_variant                                                                          |
| rs368017318 | intron_variant,genic_downstream_transcript_variant                                                                        |
| rs368023482 | intron_variant                                                                                                            |
| rs368038865 | intron_variant                                                                                                            |
| rs368105512 | intron_variant,genic_downstream_transcript_variant                                                                        |
| rs368140353 | intron_variant                                                                                                            |
| rs368150367 | upstream_transcript_variant,intron_variant,genic_upstream_transcript_variant                                              |
| rs368203119 | intron_variant,genic_upstream_transcript_variant                                                                          |
| rs368223040 | intron_variant                                                                                                            |
| rs368227467 | intron_variant,genic_upstream_transcript_variant                                                                          |
| rs368228150 | intron_variant                                                                                                            |
| rs368233103 | intron_variant                                                                                                            |
| rs368247435 | intron_variant,genic_downstream_transcript_variant                                                                        |
| rs368249740 | coding_sequence_variant,synonymous_variant,intron_variant,genic_upstream_transcript_variant,non_coding_transcript_variant |
| rs368285058 | intron_variant,genic_upstream_transcript_variant                                                                          |
| rs368305676 | intron_variant                                                                                                            |
| rs368308893 | intron_variant                                                                                                            |
| rs368312290 | coding_sequence_variant,non_coding_transcript_variant,genic_downstream_transcript_variant,missense_variant                |
| rs368325045 | intron_variant,genic_downstream_transcript_variant                                                                        |
| rs368374512 | intron_variant                                                                                                            |
| rs368375848 | intron_variant,genic_upstream_transcript_variant                                                                          |
| rs368388054 | intron_variant,genic_downstream_transcript_variant                                                                        |
| rs368406490 | intron_variant,genic_downstream_transcript_variant                                                                        |
| rs368491756 | intron_variant,genic_upstream_transcript_variant                                                                          |
| rs368501036 | intron_variant                                                                                                            |
| rs368505502 | intron_variant                                                                                                            |
| rs368514774 | intron_variant,genic_downstream_transcript_variant                                                                        |
| rs368564717 | intron_variant,genic_upstream_transcript_variant                                                                          |
| rs368589212 | intron_variant,genic_upstream_transcript_variant                                                                          |
| rs368625804 | intron_variant,genic_upstream_transcript_variant                                                                          |
| rs368774874 | intron_variant                                                                                                            |
| rs368779177 | genic_upstream_transcript_variant,intron_variant,upstream_transcript_variant                                              |
| rs368798475 | intron_variant,genic_upstream_transcript_variant                                                                          |
| rs368822968 | intron_variant                                                                                                            |
| rs368852748 | intron_variant                                                                                                            |
| rs368855125 | intron_variant                                                                                                            |
| rs368863750 | intron_variant,genic_upstream_transcript_variant                                                                          |
| rs368863888 | genic_upstream_transcript_variant,intron_variant,upstream_transcript_variant                                              |
| rs368864111 | intron_variant,genic_upstream_transcript_variant                                                                          |
| rs368866025 | intron_variant                                                                                                            |
| rs369018334 | intron_variant                                                                                                            |
| rs369026988 | intron_variant,genic_upstream_transcript_variant                                                                          |
| rs369178779 | intron_variant,genic_upstream_transcript_variant                                                                          |
| rs369191825 | genic_downstream_transcript_variant,intron_variant                                                                        |
| rs369325536 | genic_downstream_transcript_variant,intron_variant                                                                        |
| rs369327837 | genic_downstream_transcript_variant,intron_variant                                                                        |
| rs369338451 | intron_variant                                                                                                            |
| rs369381534 | intron_variant,genic_upstream_transcript_variant                                                                          |
| rs369415260 | genic_downstream_transcript_variant,intron_variant                                                                        |
| rs369439819 | upstream_transcript_variant,genic_upstream_transcript_variant,intron_variant,2KB_upstream_variant                         |
| rs369522996 | intron_variant                                                                                                            |

|             |                                                                                                          |
|-------------|----------------------------------------------------------------------------------------------------------|
| rs369545465 | intron_variant,genic_upstream_transcript_variant                                                         |
| rs369578950 | intron_variant                                                                                           |
| rs369581100 | intron_variant                                                                                           |
| rs369589827 | genic_downstream_transcript_variant,intron_variant                                                       |
| rs369607133 | intron_variant                                                                                           |
| rs369649529 | intron_variant,genic_upstream_transcript_variant                                                         |
| rs369696160 | intron_variant                                                                                           |
| rs369697508 | genic_downstream_transcript_variant,intron_variant                                                       |
| rs369705803 | 5_prime_UTR_variant,stop_gained,coding_sequence_variant,synonymous_variant,non_coding_transcript_variant |
| rs369708852 | intron_variant,genic_upstream_transcript_variant                                                         |
| rs369713005 | intron_variant                                                                                           |
| rs369765654 | genic_downstream_transcript_variant,non_coding_transcript_variant,3_prime_UTR_variant                    |
| rs369805886 | intron_variant,genic_upstream_transcript_variant                                                         |
| rs369838736 | intron_variant                                                                                           |
| rs369881174 | intron_variant                                                                                           |
| rs369881530 | intron_variant,genic_upstream_transcript_variant                                                         |
| rs369885235 | intron_variant                                                                                           |
| rs369905546 | genic_upstream_transcript_variant,intron_variant,upstream_transcript_variant                             |
| rs369954696 | intron_variant                                                                                           |
| rs369958862 | upstream_transcript_variant,genic_upstream_transcript_variant,intron_variant,2KB_upstream_variant        |
| rs37000291  | intron_variant                                                                                           |
| rs370019802 | intron_variant                                                                                           |
| rs370051917 | intron_variant,genic_upstream_transcript_variant                                                         |
| rs370073932 | genic_downstream_transcript_variant,intron_variant                                                       |
| rs370080621 | intron_variant,genic_upstream_transcript_variant                                                         |
| rs370083427 | intron_variant                                                                                           |
| rs370087590 | intron_variant                                                                                           |
| rs370139929 | genic_downstream_transcript_variant,intron_variant                                                       |
| rs370195854 | intron_variant                                                                                           |
| rs370267876 | intron_variant,genic_upstream_transcript_variant                                                         |
| rs370271056 | intron_variant,genic_upstream_transcript_variant                                                         |
| rs370274186 | genic_downstream_transcript_variant,intron_variant                                                       |
| rs370278865 | intron_variant                                                                                           |
| rs370292680 | intron_variant,genic_upstream_transcript_variant                                                         |
| rs370359785 | intron_variant,genic_upstream_transcript_variant                                                         |
| rs370374012 | intron_variant                                                                                           |
| rs370379046 | intron_variant                                                                                           |
| rs370381279 | intron_variant                                                                                           |
| rs370397027 | intron_variant                                                                                           |
| rs370444948 | genic_downstream_transcript_variant,intron_variant                                                       |
| rs370473029 | intron_variant                                                                                           |
| rs370482774 | intron_variant,genic_upstream_transcript_variant                                                         |
| rs370492792 | intron_variant,genic_upstream_transcript_variant                                                         |
| rs370593031 | genic_downstream_transcript_variant,intron_variant                                                       |
| rs370598559 | intron_variant                                                                                           |
| rs370644103 | genic_downstream_transcript_variant,intron_variant                                                       |
| rs370784631 | intron_variant                                                                                           |
| rs370798160 | intron_variant,genic_upstream_transcript_variant                                                         |
| rs370815263 | genic_downstream_transcript_variant,intron_variant                                                       |
| rs370850638 | intron_variant,genic_upstream_transcript_variant                                                         |
| rs370865031 | intron_variant                                                                                           |
| rs370874995 | intron_variant,genic_upstream_transcript_variant                                                         |
| rs370914380 | intron_variant                                                                                           |
| rs370980654 | intron_variant,genic_upstream_transcript_variant                                                         |
| rs370995016 | intron_variant                                                                                           |
| rs371020340 | intron_variant                                                                                           |
| rs371036461 | intron_variant,genic_upstream_transcript_variant                                                         |
| rs371066721 | intron_variant,genic_upstream_transcript_variant                                                         |
| rs371079191 | intron_variant                                                                                           |
| rs371083331 | genic_downstream_transcript_variant,intron_variant                                                       |
| rs371091263 | intron_variant                                                                                           |
| rs371128674 | intron_variant,genic_upstream_transcript_variant                                                         |
| rs371130084 | genic_upstream_transcript_variant,intron_variant,upstream_transcript_variant                             |
| rs371144483 | intron_variant                                                                                           |
| rs371147842 | intron_variant                                                                                           |
| rs371152827 | genic_downstream_transcript_variant,intron_variant                                                       |
| rs371159003 | intron_variant                                                                                           |
| rs371180027 | intron_variant,genic_upstream_transcript_variant                                                         |
| rs371241828 | intron_variant                                                                                           |
| rs371267972 | intron_variant,genic_upstream_transcript_variant                                                         |
| rs371281495 | genic_downstream_transcript_variant,intron_variant                                                       |
| rs371331202 | intron_variant                                                                                           |
| rs371342329 | intron_variant,genic_upstream_transcript_variant                                                         |
| rs371348187 | genic_downstream_transcript_variant,intron_variant                                                       |

|             |                                                                                                                         |
|-------------|-------------------------------------------------------------------------------------------------------------------------|
| rs371352675 | genic_downstream_transcript_variant,intron_variant                                                                      |
| rs371382301 | intron_variant,genic_upstream_transcript_variant                                                                        |
| rs371498759 | genic_upstream_transcript_variant,intron_variant,upstream_transcript_variant                                            |
| rs371512340 | intron_variant                                                                                                          |
| rs371519420 | intron_variant,genic_upstream_transcript_variant                                                                        |
| rs371530701 | intron_variant                                                                                                          |
| rs371551906 | intron_variant                                                                                                          |
| rs371556455 | intron_variant,genic_upstream_transcript_variant                                                                        |
| rs371570367 | intron_variant                                                                                                          |
| rs371575923 | intron_variant,genic_upstream_transcript_variant                                                                        |
| rs371592074 | intron_variant,genic_upstream_transcript_variant                                                                        |
| rs371600961 | genic_downstream_transcript_variant,intron_variant                                                                      |
| rs371602744 | intron_variant,genic_upstream_transcript_variant                                                                        |
| rs371609255 | genic_downstream_transcript_variant,intron_variant                                                                      |
| rs371610894 | intron_variant                                                                                                          |
| rs371627700 | intron_variant                                                                                                          |
| rs371636777 | intron_variant                                                                                                          |
| rs371656811 | genic_downstream_transcript_variant,intron_variant                                                                      |
| rs371676464 | intron_variant,genic_upstream_transcript_variant                                                                        |
| rs371723640 | intron_variant,genic_upstream_transcript_variant                                                                        |
| rs371725790 | intron_variant,genic_upstream_transcript_variant                                                                        |
| rs371766461 | intron_variant,genic_upstream_transcript_variant                                                                        |
| rs371772521 | intron_variant,genic_upstream_transcript_variant                                                                        |
| rs371773538 | genic_downstream_transcript_variant,intron_variant                                                                      |
| rs371820499 | upstream_transcript_variant,2KB_upstream_variant,intron_variant,genic_upstream_transcript_variant                       |
| rs371841510 | genic_downstream_transcript_variant,intron_variant                                                                      |
| rs371843004 | intron_variant                                                                                                          |
| rs371927164 | genic_downstream_transcript_variant,non_coding_transcript_variant,coding_sequence_variant,synonymous_variant            |
| rs371941340 | coding_sequence_variant,genic_upstream_transcript_variant,intron_variant,missense_variant,non_coding_transcript_variant |
| rs371954374 | intron_variant                                                                                                          |
| rs371968912 | genic_downstream_transcript_variant,non_coding_transcript_variant,3_prime_UTR_variant                                   |
| rs371983332 | intron_variant                                                                                                          |
| rs371997437 | genic_downstream_transcript_variant,intron_variant                                                                      |
| rs372127814 | intron_variant,genic_upstream_transcript_variant                                                                        |
| rs372233873 | intron_variant,genic_upstream_transcript_variant                                                                        |
| rs372243309 | genic_downstream_transcript_variant,intron_variant                                                                      |
| rs372258065 | intron_variant                                                                                                          |
| rs372275543 | intron_variant,genic_upstream_transcript_variant                                                                        |
| rs372314384 | intron_variant                                                                                                          |
| rs372320153 | coding_sequence_variant,genic_upstream_transcript_variant,intron_variant,missense_variant,non_coding_transcript_variant |
| rs372320976 | intron_variant                                                                                                          |
| rs372355977 | intron_variant                                                                                                          |
| rs372394766 | genic_upstream_transcript_variant,intron_variant,upstream_transcript_variant                                            |
| rs372435180 | intron_variant                                                                                                          |
| rs372507091 | intron_variant                                                                                                          |
| rs372516956 | genic_downstream_transcript_variant,intron_variant                                                                      |
| rs372548129 | genic_downstream_transcript_variant,intron_variant                                                                      |
| rs372592914 | upstream_transcript_variant,2KB_upstream_variant,intron_variant,genic_upstream_transcript_variant                       |
| rs372604482 | genic_downstream_transcript_variant,intron_variant                                                                      |
| rs372618546 | intron_variant                                                                                                          |
| rs372624042 | intron_variant,genic_upstream_transcript_variant                                                                        |
| rs372627025 | intron_variant                                                                                                          |
| rs372654692 | upstream_transcript_variant,genic_upstream_transcript_variant,intron_variant,2KB_upstream_variant                       |
| rs372658159 | intron_variant,genic_upstream_transcript_variant                                                                        |
| rs372699296 | non_coding_transcript_variant,coding_sequence_variant,missense_variant                                                  |
| rs372782270 | genic_upstream_transcript_variant,intron_variant,upstream_transcript_variant                                            |
| rs372784547 | intron_variant                                                                                                          |
| rs372801649 | intron_variant                                                                                                          |
| rs372830179 | genic_downstream_transcript_variant,non_coding_transcript_variant,3_prime_UTR_variant                                   |
| rs372968031 | intron_variant                                                                                                          |
| rs372974164 | intron_variant,genic_upstream_transcript_variant                                                                        |
| rs373030124 | genic_downstream_transcript_variant,intron_variant                                                                      |
| rs373041878 | intron_variant                                                                                                          |
| rs373075830 | upstream_transcript_variant,2KB_upstream_variant,intron_variant,genic_upstream_transcript_variant                       |
| rs373083968 | intron_variant,genic_upstream_transcript_variant                                                                        |
| rs373087103 | intron_variant,genic_upstream_transcript_variant                                                                        |
| rs373101012 | genic_downstream_transcript_variant,intron_variant                                                                      |
| rs373105607 | upstream_transcript_variant,genic_upstream_transcript_variant,intron_variant,2KB_upstream_variant                       |
| rs373107131 | intron_variant                                                                                                          |
| rs373136723 | intron_variant                                                                                                          |
| rs373195532 | intron_variant,genic_upstream_transcript_variant                                                                        |
| rs373221499 | intron_variant                                                                                                          |
| rs373253892 | genic_downstream_transcript_variant,intron_variant                                                                      |
| rs373265119 | intron_variant                                                                                                          |

|             |                                                                                                                           |
|-------------|---------------------------------------------------------------------------------------------------------------------------|
| rs373340716 | intron_variant                                                                                                            |
| rs373343541 | intron_variant,genic_upstream_transcript_variant                                                                          |
| rs373346608 | intron_variant,genic_upstream_transcript_variant                                                                          |
| rs373352648 | intron_variant,genic_upstream_transcript_variant                                                                          |
| rs373369008 | intron_variant                                                                                                            |
| rs373377385 | genic_downstream_transcript_variant,downstream_transcript_variant,intron_variant                                          |
| rs373378325 | intron_variant                                                                                                            |
| rs373437580 | coding_sequence_variant,genic_upstream_transcript_variant,intron_variant,synonymous_variant,non_coding_transcript_variant |
| rs373470921 | genic_downstream_transcript_variant,intron_variant                                                                        |
| rs373591857 | intron_variant                                                                                                            |
| rs373598739 | intron_variant                                                                                                            |
| rs373603482 | intron_variant                                                                                                            |
| rs373605293 | intron_variant                                                                                                            |
| rs373618465 | intron_variant                                                                                                            |
| rs373634891 | genic_downstream_transcript_variant,intron_variant                                                                        |
| rs373648323 | intron_variant                                                                                                            |
| rs373710761 | genic_downstream_transcript_variant,intron_variant                                                                        |
| rs373721078 | genic_upstream_transcript_variant,intron_variant,upstream_transcript_variant                                              |
| rs373721129 | genic_downstream_transcript_variant,intron_variant                                                                        |
| rs373802217 | intron_variant,genic_upstream_transcript_variant                                                                          |
| rs373806876 | intron_variant,genic_upstream_transcript_variant                                                                          |
| rs373809886 | intron_variant                                                                                                            |
| rs373819683 | intron_variant,genic_upstream_transcript_variant                                                                          |
| rs373824701 | intron_variant                                                                                                            |
| rs373837817 | intron_variant                                                                                                            |
| rs373842187 | genic_downstream_transcript_variant,intron_variant                                                                        |
| rs373854151 | genic_downstream_transcript_variant,intron_variant                                                                        |
| rs373857586 | genic_downstream_transcript_variant,non_coding_transcript_variant,coding_sequence_variant,synonymous_variant              |
| rs373914399 | intron_variant,genic_upstream_transcript_variant                                                                          |
| rs373940602 | intron_variant                                                                                                            |
| rs373972528 | genic_downstream_transcript_variant,intron_variant                                                                        |
| rs374060469 | intron_variant                                                                                                            |
| rs374292243 | intron_variant,genic_upstream_transcript_variant                                                                          |
| rs374329836 | intron_variant                                                                                                            |
| rs374348025 | genic_upstream_transcript_variant,intron_variant,upstream_transcript_variant                                              |
| rs374470641 | intron_variant                                                                                                            |
| rs374488841 | genic_downstream_transcript_variant,intron_variant                                                                        |
| rs374493155 | genic_upstream_transcript_variant,intron_variant,upstream_transcript_variant                                              |
| rs374551571 | intron_variant,genic_upstream_transcript_variant                                                                          |
| rs374557763 | intron_variant,genic_upstream_transcript_variant                                                                          |
| rs374561088 | genic_downstream_transcript_variant,intron_variant                                                                        |
| rs374567826 | intron_variant                                                                                                            |
| rs374619810 | intron_variant                                                                                                            |
| rs374641202 | intron_variant,genic_upstream_transcript_variant                                                                          |
| rs374661181 | genic_downstream_transcript_variant,intron_variant                                                                        |
| rs374693278 | genic_downstream_transcript_variant,intron_variant                                                                        |
| rs374759493 | intron_variant                                                                                                            |
| rs374793007 | intron_variant,genic_upstream_transcript_variant                                                                          |
| rs374803014 | intron_variant                                                                                                            |
| rs374809300 | intron_variant,genic_upstream_transcript_variant                                                                          |
| rs374811671 | intron_variant                                                                                                            |
| rs374906579 | genic_downstream_transcript_variant,intron_variant                                                                        |
| rs374960644 | intron_variant,genic_upstream_transcript_variant                                                                          |
| rs374967407 | intron_variant                                                                                                            |
| rs374993712 | intron_variant,genic_upstream_transcript_variant                                                                          |
| rs374996827 | intron_variant,genic_upstream_transcript_variant                                                                          |
| rs375002008 | intron_variant                                                                                                            |
| rs375075152 | genic_downstream_transcript_variant,intron_variant                                                                        |
| rs375127375 | intron_variant,genic_upstream_transcript_variant                                                                          |
| rs375235586 | intron_variant,genic_upstream_transcript_variant                                                                          |
| rs375266202 | genic_downstream_transcript_variant,intron_variant                                                                        |
| rs375272270 | intron_variant                                                                                                            |
| rs375285594 | intron_variant                                                                                                            |
| rs375298045 | intron_variant,genic_upstream_transcript_variant                                                                          |
| rs375315634 | intron_variant,genic_upstream_transcript_variant                                                                          |
| rs375317290 | intron_variant,genic_upstream_transcript_variant                                                                          |
| rs375415206 | intron_variant,genic_upstream_transcript_variant                                                                          |
| rs375461370 | genic_downstream_transcript_variant,intron_variant                                                                        |
| rs375476435 | intron_variant                                                                                                            |
| rs375500539 | genic_downstream_transcript_variant,intron_variant                                                                        |
| rs375531399 | genic_downstream_transcript_variant,intron_variant                                                                        |
| rs375535358 | intron_variant,genic_upstream_transcript_variant                                                                          |
| rs375566772 | genic_downstream_transcript_variant,intron_variant                                                                        |
| rs375569461 | intron_variant,genic_upstream_transcript_variant                                                                          |

|             |                                                                                                            |
|-------------|------------------------------------------------------------------------------------------------------------|
| rs375573005 | intron_variant,genic_upstream_transcript_variant                                                           |
| rs375621477 | genic_downstream_transcript_variant,intron_variant                                                         |
| rs375637790 | intron_variant                                                                                             |
| rs375648753 | intron_variant,genic_upstream_transcript_variant                                                           |
| rs375651515 | intron_variant,genic_upstream_transcript_variant                                                           |
| rs375674448 | intron_variant                                                                                             |
| rs375694951 | intron_variant                                                                                             |
| rs375700371 | intron_variant                                                                                             |
| rs375733437 | intron_variant                                                                                             |
| rs375756311 | intron_variant,genic_upstream_transcript_variant                                                           |
| rs375772148 | genic_downstream_transcript_variant,intron_variant                                                         |
| rs375787762 | intron_variant                                                                                             |
| rs375806834 | intron_variant                                                                                             |
| rs375835640 | intron_variant,genic_upstream_transcript_variant                                                           |
| rs375843365 | genic_downstream_transcript_variant,intron_variant                                                         |
| rs375959187 | intron_variant,genic_upstream_transcript_variant                                                           |
| rs376040317 | intron_variant,genic_upstream_transcript_variant                                                           |
| rs376045592 | intron_variant,genic_upstream_transcript_variant                                                           |
| rs376058256 | intron_variant                                                                                             |
| rs376060463 | intron_variant                                                                                             |
| rs376127365 | intron_variant                                                                                             |
| rs376137897 | intron_variant                                                                                             |
| rs376177826 | genic_upstream_transcript_variant,intron_variant,upstream_transcript_variant                               |
| rs376182957 | intron_variant                                                                                             |
| rs376192509 | intron_variant                                                                                             |
| rs376195363 | genic_downstream_transcript_variant,intron_variant                                                         |
| rs376303518 | intron_variant,genic_upstream_transcript_variant                                                           |
| rs376324433 | intron_variant                                                                                             |
| rs376331419 | intron_variant,genic_upstream_transcript_variant                                                           |
| rs376369236 | intron_variant,genic_upstream_transcript_variant                                                           |
| rs376372586 | intron_variant                                                                                             |
| rs376384548 | intron_variant,genic_upstream_transcript_variant                                                           |
| rs376387602 | intron_variant                                                                                             |
| rs376400600 | genic_downstream_transcript_variant,intron_variant                                                         |
| rs376402061 | intron_variant                                                                                             |
| rs376408065 | intron_variant                                                                                             |
| rs376409399 | intron_variant                                                                                             |
| rs376416146 | genic_upstream_transcript_variant,intron_variant,upstream_transcript_variant                               |
| rs376433266 | intron_variant                                                                                             |
| rs376444143 | intron_variant,genic_upstream_transcript_variant                                                           |
| rs376572638 | intron_variant,genic_upstream_transcript_variant                                                           |
| rs376584613 | intron_variant                                                                                             |
| rs376585988 | intron_variant                                                                                             |
| rs376669976 | intron_variant                                                                                             |
| rs376673337 | intron_variant,genic_upstream_transcript_variant                                                           |
| rs376674015 | intron_variant                                                                                             |
| rs376678277 | intron_variant,genic_upstream_transcript_variant                                                           |
| rs376686052 | intron_variant                                                                                             |
| rs376711164 | genic_downstream_transcript_variant,intron_variant                                                         |
| rs376745513 | genic_downstream_transcript_variant,downstream_transcript_variant,intron_variant                           |
| rs376751279 | genic_downstream_transcript_variant,non_coding_transcript_variant,coding_sequence_variant,missense_variant |
| rs376789821 | intron_variant                                                                                             |
| rs376790354 | intron_variant,genic_upstream_transcript_variant                                                           |
| rs376814199 | genic_downstream_transcript_variant,intron_variant                                                         |
| rs376834205 | intron_variant,genic_upstream_transcript_variant                                                           |
| rs376884212 | intron_variant,genic_upstream_transcript_variant                                                           |
| rs376914803 | genic_downstream_transcript_variant,intron_variant                                                         |
| rs376928397 | non_coding_transcript_variant,coding_sequence_variant,missense_variant                                     |
| rs376929051 | intron_variant,genic_upstream_transcript_variant                                                           |
| rs377015915 | intron_variant,genic_upstream_transcript_variant                                                           |
| rs377071518 | upstream_transcript_variant,2KB_upstream_variant,intron_variant,genic_upstream_transcript_variant          |
| rs377153244 | intron_variant                                                                                             |
| rs377271832 | intron_variant                                                                                             |
| rs377273708 | intron_variant                                                                                             |
| rs377276879 | intron_variant                                                                                             |
| rs377281773 | intron_variant                                                                                             |
| rs377343977 | intron_variant                                                                                             |
| rs377420134 | genic_downstream_transcript_variant,intron_variant                                                         |
| rs377459941 | intron_variant,genic_upstream_transcript_variant                                                           |
| rs377462977 | genic_downstream_transcript_variant,downstream_transcript_variant,intron_variant                           |
| rs377463516 | intron_variant,genic_upstream_transcript_variant                                                           |
| rs377469830 | intron_variant                                                                                             |
| rs377476551 | intron_variant,genic_upstream_transcript_variant                                                           |
| rs377522649 | upstream_transcript_variant,2KB_upstream_variant,intron_variant,genic_upstream_transcript_variant          |

|             |                                                                                                   |
|-------------|---------------------------------------------------------------------------------------------------|
| rs377523653 | intron_variant                                                                                    |
| rs377526949 | downstream_transcript_variant,500B_downstream_variant                                             |
| rs377528988 | intron_variant                                                                                    |
| rs377536391 | intron_variant,genic_upstream_transcript_variant                                                  |
| rs377618312 | intron_variant,genic_upstream_transcript_variant                                                  |
| rs377624981 | intron_variant                                                                                    |
| rs377658190 | intron_variant                                                                                    |
| rs377758389 | genic_downstream_transcript_variant,intron_variant                                                |
| rs386717097 | intron_variant,genic_upstream_transcript_variant                                                  |
| rs386717098 | intron_variant                                                                                    |
| rs386717099 | intron_variant                                                                                    |
| rs397815915 | intron_variant,genic_upstream_transcript_variant                                                  |
| rs527297841 | intron_variant,genic_upstream_transcript_variant                                                  |
| rs527299112 | intron_variant,genic_upstream_transcript_variant                                                  |
| rs527326849 | genic_downstream_transcript_variant,intron_variant                                                |
| rs527334474 | intron_variant,genic_upstream_transcript_variant                                                  |
| rs527372963 | upstream_transcript_variant,genic_upstream_transcript_variant,intron_variant,2KB_upstream_variant |
| rs527420953 | intron_variant                                                                                    |
| rs527445368 | upstream_transcript_variant,2KB_upstream_variant,intron_variant,genic_upstream_transcript_variant |
| rs527455120 | intron_variant,genic_upstream_transcript_variant                                                  |
| rs527462682 | genic_downstream_transcript_variant,intron_variant                                                |
| rs527471177 | intron_variant                                                                                    |
| rs527505347 | intron_variant,genic_upstream_transcript_variant                                                  |
| rs527550963 | upstream_transcript_variant,genic_upstream_transcript_variant,intron_variant,2KB_upstream_variant |
| rs527561428 | intron_variant,genic_upstream_transcript_variant                                                  |
| rs527568562 | genic_downstream_transcript_variant,intron_variant                                                |
| rs527574159 | genic_downstream_transcript_variant,intron_variant                                                |
| rs527599112 | intron_variant                                                                                    |
| rs527649236 | genic_downstream_transcript_variant,intron_variant                                                |
| rs527650469 | intron_variant,genic_upstream_transcript_variant                                                  |
| rs527656939 | intron_variant,genic_upstream_transcript_variant                                                  |
| rs527663775 | intron_variant                                                                                    |
| rs527686191 | genic_downstream_transcript_variant,intron_variant                                                |
| rs527712364 | intron_variant,genic_upstream_transcript_variant                                                  |
| rs527743235 | intron_variant                                                                                    |
| rs527786414 | intron_variant                                                                                    |
| rs527792763 | intron_variant                                                                                    |
| rs527807128 | intron_variant                                                                                    |
| rs527810273 | genic_downstream_transcript_variant,intron_variant                                                |
| rs527888516 | intron_variant,genic_upstream_transcript_variant                                                  |
| rs527892794 | intron_variant,genic_upstream_transcript_variant                                                  |
| rs527933016 | intron_variant,genic_upstream_transcript_variant                                                  |
| rs527937695 | intron_variant                                                                                    |
| rs527977246 | intron_variant                                                                                    |
| rs527977384 | genic_downstream_transcript_variant,intron_variant                                                |
| rs527985565 | intron_variant,genic_upstream_transcript_variant                                                  |
| rs528017332 | intron_variant                                                                                    |
| rs528019768 | intron_variant,genic_upstream_transcript_variant                                                  |
| rs528029309 | intron_variant,genic_upstream_transcript_variant                                                  |
| rs528053401 | intron_variant                                                                                    |
| rs528060896 | genic_downstream_transcript_variant,intron_variant                                                |
| rs528063210 | intron_variant                                                                                    |
| rs528155409 | intron_variant,genic_upstream_transcript_variant                                                  |
| rs528157054 | intron_variant                                                                                    |
| rs528168908 | intron_variant,genic_upstream_transcript_variant                                                  |
| rs528172363 | genic_downstream_transcript_variant,intron_variant                                                |
| rs528195279 | intron_variant                                                                                    |
| rs528209488 | genic_downstream_transcript_variant,intron_variant                                                |
| rs528224773 | intron_variant                                                                                    |
| rs528225840 | genic_downstream_transcript_variant,intron_variant                                                |
| rs528320542 | intron_variant                                                                                    |
| rs528342908 | intron_variant,genic_upstream_transcript_variant                                                  |
| rs528372333 | genic_downstream_transcript_variant,intron_variant                                                |
| rs528380080 | intron_variant,genic_upstream_transcript_variant                                                  |
| rs528410037 | genic_upstream_transcript_variant,intron_variant,upstream_transcript_variant                      |
| rs528423600 | intron_variant                                                                                    |
| rs528470644 | intron_variant,genic_upstream_transcript_variant                                                  |
| rs528509838 | intron_variant,genic_upstream_transcript_variant                                                  |
| rs528512136 | intron_variant                                                                                    |
| rs528518989 | intron_variant,genic_upstream_transcript_variant                                                  |
| rs528531020 | intron_variant,genic_upstream_transcript_variant                                                  |
| rs528627456 | intron_variant,genic_upstream_transcript_variant                                                  |
| rs528636720 | genic_downstream_transcript_variant,intron_variant                                                |
| rs528639785 | intron_variant,genic_upstream_transcript_variant                                                  |

|             |                                                                                                   |
|-------------|---------------------------------------------------------------------------------------------------|
| rs528649138 | genic_upstream_transcript_variant,2KB_upstream_variant,intron_variant,upstream_transcript_variant |
| rs528662007 | intron_variant                                                                                    |
| rs528695579 | genic_downstream_transcript_variant,intron_variant                                                |
| rs528712262 | intron_variant,genic_upstream_transcript_variant                                                  |
| rs528747394 | intron_variant                                                                                    |
| rs528788133 | non_coding_transcript_variant,coding_sequence_variant,synonymous_variant                          |
| rs528791880 | intron_variant,genic_upstream_transcript_variant                                                  |
| rs528802208 | intron_variant                                                                                    |
| rs528806881 | genic_downstream_transcript_variant,intron_variant                                                |
| rs528808993 | genic_downstream_transcript_variant,intron_variant                                                |
| rs528850278 | intron_variant                                                                                    |
| rs528884923 | intron_variant,genic_upstream_transcript_variant                                                  |
| rs528885956 | intron_variant                                                                                    |
| rs528898413 | intron_variant,genic_upstream_transcript_variant                                                  |
| rs528922966 | genic_downstream_transcript_variant,intron_variant                                                |
| rs528940599 | genic_downstream_transcript_variant,intron_variant                                                |
| rs528946014 | intron_variant,genic_upstream_transcript_variant                                                  |
| rs528951146 | intron_variant                                                                                    |
| rs528974254 | intron_variant                                                                                    |
| rs528987834 | intron_variant                                                                                    |
| rs528997092 | intron_variant                                                                                    |
| rs529009892 | intron_variant,genic_upstream_transcript_variant                                                  |
| rs529035673 | intron_variant,genic_upstream_transcript_variant                                                  |
| rs529055156 | intron_variant                                                                                    |
| rs529061864 | intron_variant,genic_upstream_transcript_variant                                                  |
| rs529074962 | intron_variant                                                                                    |
| rs529104974 | intron_variant,genic_upstream_transcript_variant                                                  |
| rs529146979 | intron_variant,genic_upstream_transcript_variant                                                  |
| rs529152273 | intron_variant                                                                                    |
| rs529178455 | upstream_transcript_variant,2KB_upstream_variant,intron_variant,genic_upstream_transcript_variant |
| rs529190112 | intron_variant                                                                                    |
| rs529241881 | intron_variant,genic_upstream_transcript_variant                                                  |
| rs529266118 | intron_variant,genic_upstream_transcript_variant                                                  |
| rs529292238 | intron_variant,genic_upstream_transcript_variant                                                  |
| rs529325798 | genic_downstream_transcript_variant,intron_variant                                                |
| rs529356574 | intron_variant,genic_upstream_transcript_variant                                                  |
| rs529373051 | intron_variant,genic_upstream_transcript_variant                                                  |
| rs529401634 | intron_variant,genic_upstream_transcript_variant                                                  |
| rs529441817 | intron_variant                                                                                    |
| rs529446580 | intron_variant                                                                                    |
| rs529447906 | intron_variant,genic_upstream_transcript_variant                                                  |
| rs529499199 | genic_downstream_transcript_variant,intron_variant                                                |
| rs529501961 | intron_variant                                                                                    |
| rs529524400 | intron_variant,genic_upstream_transcript_variant                                                  |
| rs529541759 | intron_variant                                                                                    |
| rs529559092 | genic_downstream_transcript_variant,intron_variant                                                |
| rs529584256 | intron_variant,genic_upstream_transcript_variant                                                  |
| rs529640289 | upstream_transcript_variant,2KB_upstream_variant,intron_variant,genic_upstream_transcript_variant |
| rs529641067 | intron_variant,genic_upstream_transcript_variant                                                  |
| rs529671847 | intron_variant                                                                                    |
| rs529685765 | genic_downstream_transcript_variant,intron_variant                                                |
| rs529701640 | intron_variant                                                                                    |
| rs529724400 | genic_downstream_transcript_variant,intron_variant                                                |
| rs529730834 | intron_variant,genic_upstream_transcript_variant                                                  |
| rs529840681 | intron_variant,genic_upstream_transcript_variant                                                  |
| rs529874651 | genic_downstream_transcript_variant,intron_variant                                                |
| rs529906556 | intron_variant                                                                                    |
| rs529945568 | intron_variant                                                                                    |
| rs529958244 | intron_variant                                                                                    |
| rs529965806 | intron_variant,genic_upstream_transcript_variant                                                  |
| rs530088642 | genic_downstream_transcript_variant,intron_variant                                                |
| rs530088726 | genic_downstream_transcript_variant,intron_variant                                                |
| rs530112006 | intron_variant,genic_upstream_transcript_variant                                                  |
| rs530117692 | intron_variant,genic_upstream_transcript_variant                                                  |
| rs530126471 | genic_downstream_transcript_variant,intron_variant                                                |
| rs530172625 | genic_downstream_transcript_variant,intron_variant                                                |
| rs530175280 | intron_variant,genic_upstream_transcript_variant                                                  |
| rs530205043 | intron_variant,genic_upstream_transcript_variant                                                  |
| rs530218950 | intron_variant,genic_upstream_transcript_variant                                                  |
| rs530239180 | intron_variant                                                                                    |
| rs530299295 | intron_variant,genic_upstream_transcript_variant                                                  |
| rs530304125 | intron_variant                                                                                    |
| rs530318015 | intron_variant,genic_upstream_transcript_variant                                                  |
| rs530336927 | intron_variant                                                                                    |

|             |                                                                                                   |
|-------------|---------------------------------------------------------------------------------------------------|
| rs530359832 | intron_variant,genic_upstream_transcript_variant                                                  |
| rs530401300 | intron_variant,genic_upstream_transcript_variant                                                  |
| rs530406243 | intron_variant,genic_upstream_transcript_variant                                                  |
| rs530424106 | intron_variant                                                                                    |
| rs530460986 | intron_variant                                                                                    |
| rs530487782 | genic_downstream_transcript_variant,intron_variant                                                |
| rs530501129 | intron_variant,genic_upstream_transcript_variant                                                  |
| rs530502269 | intron_variant                                                                                    |
| rs530526963 | genic_downstream_transcript_variant,intron_variant                                                |
| rs530540905 | intron_variant                                                                                    |
| rs530586972 | intron_variant,genic_upstream_transcript_variant                                                  |
| rs530589866 | intron_variant                                                                                    |
| rs530601636 | genic_upstream_transcript_variant,intron_variant,upstream_transcript_variant                      |
| rs530663950 | downstream_transcript_variant,500B_downstream_variant                                             |
| rs530688528 | intron_variant                                                                                    |
| rs530731430 | genic_downstream_transcript_variant,intron_variant                                                |
| rs530753165 | intron_variant,genic_upstream_transcript_variant                                                  |
| rs530772513 | intron_variant                                                                                    |
| rs530803113 | intron_variant,genic_upstream_transcript_variant                                                  |
| rs530805731 | intron_variant,genic_upstream_transcript_variant                                                  |
| rs530808656 | genic_downstream_transcript_variant,intron_variant                                                |
| rs530813702 | intron_variant,genic_upstream_transcript_variant                                                  |
| rs530815154 | intron_variant,genic_upstream_transcript_variant                                                  |
| rs530815718 | intron_variant,genic_upstream_transcript_variant                                                  |
| rs530835127 | intron_variant,genic_upstream_transcript_variant                                                  |
| rs530859482 | intron_variant                                                                                    |
| rs530859561 | intron_variant                                                                                    |
| rs530961604 | intron_variant,genic_upstream_transcript_variant                                                  |
| rs530978603 | genic_downstream_transcript_variant,intron_variant                                                |
| rs530989584 | intron_variant                                                                                    |
| rs531001022 | intron_variant,genic_upstream_transcript_variant                                                  |
| rs531018867 | genic_downstream_transcript_variant,intron_variant                                                |
| rs531024690 | intron_variant,genic_upstream_transcript_variant                                                  |
| rs531059164 | intron_variant,genic_upstream_transcript_variant                                                  |
| rs531085006 | intron_variant,genic_upstream_transcript_variant                                                  |
| rs531104447 | intron_variant                                                                                    |
| rs531127138 | intron_variant                                                                                    |
| rs531166542 | intron_variant                                                                                    |
| rs531167906 | intron_variant                                                                                    |
| rs531239997 | intron_variant,genic_upstream_transcript_variant                                                  |
| rs531265142 | intron_variant,genic_upstream_transcript_variant                                                  |
| rs531290221 | intron_variant                                                                                    |
| rs531291023 | genic_downstream_transcript_variant,intron_variant                                                |
| rs531337468 | intron_variant,genic_upstream_transcript_variant                                                  |
| rs531364636 | upstream_transcript_variant,2KB_upstream_variant,intron_variant,genic_upstream_transcript_variant |
| rs531420311 | genic_downstream_transcript_variant,non_coding_transcript_variant,3_prime_UTR_variant             |
| rs531420489 | genic_downstream_transcript_variant,intron_variant                                                |
| rs531426152 | intron_variant                                                                                    |
| rs531426294 | intron_variant,genic_upstream_transcript_variant                                                  |
| rs531448212 | intron_variant                                                                                    |
| rs531466945 | intron_variant,genic_upstream_transcript_variant                                                  |
| rs531479171 | intron_variant,genic_upstream_transcript_variant                                                  |
| rs531529809 | intron_variant                                                                                    |
| rs531555077 | upstream_transcript_variant,2KB_upstream_variant,intron_variant,genic_upstream_transcript_variant |
| rs531565724 | intron_variant                                                                                    |
| rs531569840 | intron_variant,genic_upstream_transcript_variant                                                  |
| rs531578294 | intron_variant                                                                                    |
| rs531613112 | intron_variant,genic_upstream_transcript_variant                                                  |
| rs531618551 | intron_variant,genic_upstream_transcript_variant                                                  |
| rs531653399 | intron_variant                                                                                    |
| rs531680031 | intron_variant,genic_upstream_transcript_variant                                                  |
| rs531681160 | genic_downstream_transcript_variant,intron_variant                                                |
| rs531689003 | intron_variant,genic_upstream_transcript_variant                                                  |
| rs531714906 | intron_variant,genic_upstream_transcript_variant                                                  |
| rs531720730 | genic_downstream_transcript_variant,intron_variant                                                |
| rs531721598 | intron_variant                                                                                    |
| rs531739175 | genic_downstream_transcript_variant,intron_variant                                                |
| rs531765851 | intron_variant,genic_upstream_transcript_variant                                                  |
| rs531794586 | intron_variant,genic_upstream_transcript_variant                                                  |
| rs531877571 | intron_variant,genic_upstream_transcript_variant                                                  |
| rs531891537 | intron_variant                                                                                    |
| rs531898234 | intron_variant                                                                                    |
| rs531944377 | upstream_transcript_variant,2KB_upstream_variant,intron_variant,genic_upstream_transcript_variant |
| rs531957623 | intron_variant,genic_upstream_transcript_variant                                                  |

|             |                                                                                                   |
|-------------|---------------------------------------------------------------------------------------------------|
| rs531965383 | intron_variant,genic_upstream_transcript_variant                                                  |
| rs531986015 | genic_upstream_transcript_variant,2KB_upstream_variant,intron_variant,upstream_transcript_variant |
| rs531987026 | intron_variant                                                                                    |
| rs531994376 | intron_variant                                                                                    |
| rs532014509 | genic_downstream_transcript_variant,intron_variant                                                |
| rs532016632 | intron_variant,genic_upstream_transcript_variant                                                  |
| rs532025406 | intron_variant                                                                                    |
| rs532061590 | intron_variant,genic_upstream_transcript_variant                                                  |
| rs532097993 | genic_downstream_transcript_variant,intron_variant                                                |
| rs532124885 | non_coding_transcript_variant,coding_sequence_variant,missense_variant                            |
| rs532136202 | genic_downstream_transcript_variant,intron_variant                                                |
| rs532182954 | intron_variant,genic_upstream_transcript_variant                                                  |
| rs532234891 | intron_variant                                                                                    |
| rs532240873 | intron_variant                                                                                    |
| rs532243343 | intron_variant,genic_upstream_transcript_variant                                                  |
| rs532482919 | intron_variant,genic_upstream_transcript_variant                                                  |
| rs532566326 | genic_downstream_transcript_variant,intron_variant                                                |
| rs532582971 | intron_variant,genic_upstream_transcript_variant                                                  |
| rs532631008 | 5_prime_UTR_variant,intron_variant,upstream_transcript_variant,genic_upstream_transcript_variant  |
| rs532637960 | intron_variant                                                                                    |
| rs532646177 | intron_variant,genic_upstream_transcript_variant                                                  |
| rs532663407 | intron_variant                                                                                    |
| rs532673266 | intron_variant                                                                                    |
| rs532673717 | intron_variant                                                                                    |
| rs532721417 | intron_variant                                                                                    |
| rs532727158 | intron_variant,genic_upstream_transcript_variant                                                  |
| rs532757054 | intron_variant                                                                                    |
| rs532798220 | intron_variant                                                                                    |
| rs532802993 | intron_variant,genic_upstream_transcript_variant                                                  |
| rs532813357 | intron_variant,genic_upstream_transcript_variant                                                  |
| rs532817576 | intron_variant                                                                                    |
| rs532845702 | genic_downstream_transcript_variant,intron_variant                                                |
| rs532852079 | intron_variant,genic_upstream_transcript_variant                                                  |
| rs532887056 | genic_downstream_transcript_variant,intron_variant                                                |
| rs532890285 | genic_downstream_transcript_variant,intron_variant                                                |
| rs532900254 | intron_variant                                                                                    |
| rs532909300 | intron_variant,genic_upstream_transcript_variant                                                  |
| rs532935054 | genic_downstream_transcript_variant,intron_variant                                                |
| rs532947757 | intron_variant,genic_upstream_transcript_variant                                                  |
| rs532952903 | intron_variant,genic_upstream_transcript_variant                                                  |
| rs532971193 | genic_downstream_transcript_variant,intron_variant                                                |
| rs532972240 | downstream_transcript_variant,500B_downstream_variant                                             |
| rs532985036 | genic_downstream_transcript_variant,intron_variant                                                |
| rs533061410 | intron_variant                                                                                    |
| rs533068280 | genic_downstream_transcript_variant,intron_variant                                                |
| rs533070003 | intron_variant                                                                                    |
| rs533100188 | genic_downstream_transcript_variant,intron_variant                                                |
| rs533120187 | genic_downstream_transcript_variant,intron_variant                                                |
| rs533130506 | intron_variant,genic_upstream_transcript_variant                                                  |
| rs533134903 | intron_variant                                                                                    |
| rs533203508 | intron_variant                                                                                    |
| rs533210775 | intron_variant,genic_upstream_transcript_variant                                                  |
| rs533222301 | intron_variant                                                                                    |
| rs533237263 | intron_variant                                                                                    |
| rs533237918 | intron_variant,genic_upstream_transcript_variant                                                  |
| rs533239068 | genic_downstream_transcript_variant,intron_variant                                                |
| rs533285461 | genic_downstream_transcript_variant,intron_variant                                                |
| rs533308073 | intron_variant,genic_upstream_transcript_variant                                                  |
| rs533319655 | intron_variant                                                                                    |
| rs533365327 | genic_downstream_transcript_variant,intron_variant                                                |
| rs533373216 | intron_variant,genic_upstream_transcript_variant                                                  |
| rs533382063 | intron_variant,genic_upstream_transcript_variant                                                  |
| rs533419090 | genic_upstream_transcript_variant,intron_variant,upstream_transcript_variant                      |
| rs533425751 | intron_variant                                                                                    |
| rs533435832 | intron_variant,genic_upstream_transcript_variant                                                  |
| rs533479506 | intron_variant                                                                                    |
| rs533503139 | intron_variant                                                                                    |
| rs533525932 | intron_variant,genic_upstream_transcript_variant                                                  |
| rs533562645 | intron_variant                                                                                    |
| rs533600061 | intron_variant                                                                                    |
| rs533640524 | intron_variant                                                                                    |
| rs533707752 | intron_variant                                                                                    |
| rs533722293 | intron_variant                                                                                    |
| rs533743403 | intron_variant                                                                                    |

|             |                                                                                                   |
|-------------|---------------------------------------------------------------------------------------------------|
| rs533798699 | genic_downstream_transcript_variant,intron_variant                                                |
| rs533817358 | intron_variant,genic_upstream_transcript_variant                                                  |
| rs533823901 | intron_variant                                                                                    |
| rs533855630 | intron_variant,genic_upstream_transcript_variant                                                  |
| rs533881098 | genic_downstream_transcript_variant,intron_variant                                                |
| rs533882295 | genic_downstream_transcript_variant,intron_variant                                                |
| rs533927960 | intron_variant,genic_upstream_transcript_variant                                                  |
| rs533951282 | intron_variant                                                                                    |
| rs533954179 | intron_variant,genic_upstream_transcript_variant                                                  |
| rs533974682 | intron_variant                                                                                    |
| rs533980825 | intron_variant                                                                                    |
| rs534005596 | intron_variant                                                                                    |
| rs534043695 | genic_downstream_transcript_variant,intron_variant                                                |
| rs534085049 | intron_variant                                                                                    |
| rs534094322 | intron_variant                                                                                    |
| rs534096195 | intron_variant                                                                                    |
| rs534138970 | intron_variant,genic_upstream_transcript_variant                                                  |
| rs534254489 | intron_variant,genic_upstream_transcript_variant                                                  |
| rs534257160 | intron_variant,genic_upstream_transcript_variant                                                  |
| rs534285822 | genic_downstream_transcript_variant,intron_variant                                                |
| rs534286739 | intron_variant                                                                                    |
| rs534295642 | intron_variant,genic_upstream_transcript_variant                                                  |
| rs534298235 | intron_variant,genic_upstream_transcript_variant                                                  |
| rs534306270 | intron_variant                                                                                    |
| rs534308640 | intron_variant                                                                                    |
| rs534314962 | genic_downstream_transcript_variant,intron_variant                                                |
| rs534379730 | intron_variant,genic_upstream_transcript_variant                                                  |
| rs534381931 | intron_variant                                                                                    |
| rs534406308 | intron_variant,genic_upstream_transcript_variant                                                  |
| rs534417009 | intron_variant                                                                                    |
| rs534424133 | intron_variant                                                                                    |
| rs534463648 | intron_variant                                                                                    |
| rs534465126 | intron_variant                                                                                    |
| rs534473251 | genic_downstream_transcript_variant,non_coding_transcript_variant,3_prime_UTR_variant             |
| rs534491220 | intron_variant                                                                                    |
| rs534496555 | intron_variant                                                                                    |
| rs534546602 | intron_variant                                                                                    |
| rs534602528 | genic_downstream_transcript_variant,intron_variant                                                |
| rs534621938 | genic_downstream_transcript_variant,intron_variant                                                |
| rs534629631 | intron_variant,genic_upstream_transcript_variant                                                  |
| rs534635383 | intron_variant,genic_upstream_transcript_variant                                                  |
| rs534639807 | intron_variant                                                                                    |
| rs534660573 | intron_variant                                                                                    |
| rs534680121 | intron_variant                                                                                    |
| rs534699983 | intron_variant                                                                                    |
| rs534706980 | genic_downstream_transcript_variant,intron_variant                                                |
| rs534722049 | genic_downstream_transcript_variant,intron_variant                                                |
| rs534739750 | intron_variant                                                                                    |
| rs534758557 | genic_downstream_transcript_variant,intron_variant                                                |
| rs534765843 | intron_variant,genic_upstream_transcript_variant                                                  |
| rs534809311 | intron_variant                                                                                    |
| rs534819031 | upstream_transcript_variant,2KB_upstream_variant,intron_variant,genic_upstream_transcript_variant |
| rs534827373 | intron_variant,genic_upstream_transcript_variant                                                  |
| rs534837239 | intron_variant                                                                                    |
| rs534859339 | intron_variant                                                                                    |
| rs534864019 | genic_downstream_transcript_variant,intron_variant                                                |
| rs534880861 | intron_variant                                                                                    |
| rs534913663 | genic_downstream_transcript_variant,intron_variant                                                |
| rs534915068 | intron_variant                                                                                    |
| rs534924166 | intron_variant                                                                                    |
| rs534975019 | intron_variant,genic_upstream_transcript_variant                                                  |
| rs535010118 | intron_variant                                                                                    |
| rs535011703 | intron_variant                                                                                    |
| rs535021820 | genic_downstream_transcript_variant,intron_variant                                                |
| rs535037880 | intron_variant,genic_upstream_transcript_variant                                                  |
| rs535127764 | genic_downstream_transcript_variant,non_coding_transcript_variant,3_prime_UTR_variant             |
| rs535158148 | intron_variant,genic_upstream_transcript_variant                                                  |
| rs535192701 | intron_variant                                                                                    |
| rs535237691 | genic_downstream_transcript_variant,intron_variant                                                |
| rs535252636 | genic_upstream_transcript_variant,2KB_upstream_variant,intron_variant,upstream_transcript_variant |
| rs535271213 | genic_downstream_transcript_variant,intron_variant                                                |
| rs535284043 | intron_variant,genic_upstream_transcript_variant                                                  |
| rs535303102 | intron_variant                                                                                    |
| rs535323183 | intron_variant,genic_upstream_transcript_variant                                                  |

|             |                                                                                                                           |
|-------------|---------------------------------------------------------------------------------------------------------------------------|
| rs535331027 | intron_variant                                                                                                            |
| rs535340888 | genic_upstream_transcript_variant,intron_variant,upstream_transcript_variant                                              |
| rs535343797 | intron_variant,genic_upstream_transcript_variant                                                                          |
| rs535349765 | intron_variant,genic_upstream_transcript_variant                                                                          |
| rs535365592 | intron_variant,genic_upstream_transcript_variant                                                                          |
| rs535419182 | intron_variant                                                                                                            |
| rs535422013 | genic_downstream_transcript_variant,intron_variant                                                                        |
| rs535426216 | genic_downstream_transcript_variant,intron_variant                                                                        |
| rs535434508 | upstream_transcript_variant,2KB_upstream_variant,intron_variant,genic_upstream_transcript_variant                         |
| rs535507062 | genic_upstream_transcript_variant,intron_variant,non_coding_transcript_variant,coding_sequence_variant,synonymous_variant |
| rs535518454 | intron_variant                                                                                                            |
| rs535535214 | genic_downstream_transcript_variant,intron_variant                                                                        |
| rs535544001 | intron_variant                                                                                                            |
| rs535552278 | intron_variant,genic_upstream_transcript_variant                                                                          |
| rs535570426 | intron_variant,genic_upstream_transcript_variant                                                                          |
| rs535592040 | intron_variant,genic_upstream_transcript_variant                                                                          |
| rs535608644 | intron_variant,genic_upstream_transcript_variant                                                                          |
| rs535621683 | intron_variant,genic_upstream_transcript_variant                                                                          |
| rs535624747 | intron_variant                                                                                                            |
| rs535674630 | intron_variant,genic_upstream_transcript_variant                                                                          |
| rs535680807 | genic_downstream_transcript_variant,intron_variant                                                                        |
| rs535685294 | genic_downstream_transcript_variant,intron_variant                                                                        |
| rs535714239 | intron_variant                                                                                                            |
| rs535728274 | intron_variant                                                                                                            |
| rs535732046 | intron_variant,genic_upstream_transcript_variant                                                                          |
| rs535733183 | intron_variant,genic_upstream_transcript_variant                                                                          |
| rs535744947 | genic_downstream_transcript_variant,intron_variant                                                                        |
| rs535751332 | intron_variant                                                                                                            |
| rs535781579 | intron_variant,genic_upstream_transcript_variant                                                                          |
| rs535917613 | intron_variant                                                                                                            |
| rs535919237 | intron_variant,genic_upstream_transcript_variant                                                                          |
| rs535919648 | intron_variant,genic_upstream_transcript_variant                                                                          |
| rs535932669 | genic_upstream_transcript_variant,2KB_upstream_variant,intron_variant,upstream_transcript_variant                         |
| rs535950095 | intron_variant,genic_upstream_transcript_variant                                                                          |
| rs535979728 | intron_variant,genic_upstream_transcript_variant                                                                          |
| rs535992810 | intron_variant,genic_upstream_transcript_variant                                                                          |
| rs536040237 | intron_variant,genic_upstream_transcript_variant                                                                          |
| rs536063252 | intron_variant,genic_upstream_transcript_variant                                                                          |
| rs536068548 | intron_variant,genic_upstream_transcript_variant                                                                          |
| rs536074433 | intron_variant,genic_upstream_transcript_variant                                                                          |
| rs536104082 | intron_variant,genic_upstream_transcript_variant                                                                          |
| rs536106097 | intron_variant,genic_upstream_transcript_variant                                                                          |
| rs536116467 | intron_variant,genic_upstream_transcript_variant                                                                          |
| rs536164942 | intron_variant                                                                                                            |
| rs536168827 | intron_variant,genic_upstream_transcript_variant                                                                          |
| rs536169746 | intron_variant                                                                                                            |
| rs536174107 | intron_variant,genic_upstream_transcript_variant                                                                          |
| rs536209646 | intron_variant                                                                                                            |
| rs536222726 | intron_variant                                                                                                            |
| rs536249652 | intron_variant,genic_upstream_transcript_variant                                                                          |
| rs536296089 | intron_variant,genic_upstream_transcript_variant                                                                          |
| rs536296897 | intron_variant                                                                                                            |
| rs536309776 | intron_variant                                                                                                            |
| rs536311740 | intron_variant                                                                                                            |
| rs536317723 | genic_downstream_transcript_variant,intron_variant                                                                        |
| rs536333714 | intron_variant                                                                                                            |
| rs536348794 | intron_variant                                                                                                            |
| rs536364417 | intron_variant                                                                                                            |
| rs536395126 | intron_variant,genic_upstream_transcript_variant                                                                          |
| rs536399040 | intron_variant                                                                                                            |
| rs536471730 | genic_downstream_transcript_variant,intron_variant                                                                        |
| rs536475974 | intron_variant                                                                                                            |
| rs536487199 | intron_variant                                                                                                            |
| rs536505958 | intron_variant,genic_upstream_transcript_variant                                                                          |
| rs536565948 | intron_variant                                                                                                            |
| rs536609409 | intron_variant,genic_upstream_transcript_variant                                                                          |
| rs536646650 | intron_variant                                                                                                            |
| rs536656033 | genic_downstream_transcript_variant,intron_variant                                                                        |
| rs536685764 | intron_variant                                                                                                            |
| rs536741272 | genic_downstream_transcript_variant,intron_variant                                                                        |
| rs536771698 | intron_variant                                                                                                            |
| rs536778690 | genic_downstream_transcript_variant,intron_variant                                                                        |
| rs536788316 | intron_variant,upstream_transcript_variant,genic_upstream_transcript_variant,2KB_upstream_variant                         |
| rs536805301 | intron_variant                                                                                                            |

|             |                                                                                                    |
|-------------|----------------------------------------------------------------------------------------------------|
| rs536901330 | intron_variant,genic_upstream_transcript_variant                                                   |
| rs536927268 | intron_variant                                                                                     |
| rs536927736 | intron_variant                                                                                     |
| rs536957542 | intron_variant,genic_upstream_transcript_variant                                                   |
| rs536965200 | intron_variant                                                                                     |
| rs536990835 | intron_variant,genic_upstream_transcript_variant                                                   |
| rs537040145 | intron_variant                                                                                     |
| rs537057221 | intron_variant,genic_upstream_transcript_variant                                                   |
| rs537071011 | intron_variant,genic_downstream_transcript_variant                                                 |
| rs537081991 | intron_variant,genic_upstream_transcript_variant                                                   |
| rs537085817 | intron_variant,genic_upstream_transcript_variant                                                   |
| rs537120016 | intron_variant,genic_upstream_transcript_variant                                                   |
| rs537177439 | intron_variant,genic_downstream_transcript_variant                                                 |
| rs537226354 | intron_variant,genic_upstream_transcript_variant                                                   |
| rs537241228 | intron_variant,genic_upstream_transcript_variant                                                   |
| rs537251925 | intron_variant,genic_downstream_transcript_variant                                                 |
| rs537293613 | intron_variant                                                                                     |
| rs537301762 | intron_variant                                                                                     |
| rs537310919 | intron_variant,genic_upstream_transcript_variant                                                   |
| rs537329547 | intron_variant,genic_upstream_transcript_variant                                                   |
| rs537344294 | intron_variant,genic_downstream_transcript_variant                                                 |
| rs537381041 | intron_variant,genic_downstream_transcript_variant                                                 |
| rs537411690 | intron_variant                                                                                     |
| rs537470565 | intron_variant,genic_downstream_transcript_variant                                                 |
| rs537544527 | intron_variant                                                                                     |
| rs537568243 | intron_variant,genic_upstream_transcript_variant                                                   |
| rs537568605 | intron_variant,genic_upstream_transcript_variant                                                   |
| rs537629525 | intron_variant,genic_upstream_transcript_variant                                                   |
| rs537641531 | intron_variant,upstream_transcript_variant,genic_upstream_transcript_variant                       |
| rs537678258 | intron_variant                                                                                     |
| rs537728288 | intron_variant,upstream_transcript_variant,genic_upstream_transcript_variant,2KB_upstream_variant  |
| rs537742050 | intron_variant                                                                                     |
| rs537743356 | intron_variant,genic_downstream_transcript_variant                                                 |
| rs537772162 | intron_variant                                                                                     |
| rs537781991 | 3_prime_UTR_variant,genic_downstream_transcript_variant,non_coding_transcript_variant              |
| rs537793579 | 5_prime_UTR_variant,intron_variant,genic_upstream_transcript_variant,non_coding_transcript_variant |
| rs537803270 | intron_variant                                                                                     |
| rs537881614 | intron_variant                                                                                     |
| rs537927743 | intron_variant                                                                                     |
| rs537970103 | intron_variant,genic_upstream_transcript_variant                                                   |
| rs537985831 | intron_variant,genic_downstream_transcript_variant                                                 |
| rs538013359 | intron_variant,genic_downstream_transcript_variant                                                 |
| rs538052613 | intron_variant,genic_downstream_transcript_variant                                                 |
| rs538098468 | intron_variant,genic_upstream_transcript_variant                                                   |
| rs538126385 | intron_variant                                                                                     |
| rs538165357 | intron_variant                                                                                     |
| rs538168047 | intron_variant                                                                                     |
| rs538181845 | intron_variant,genic_upstream_transcript_variant                                                   |
| rs538182014 | intron_variant,genic_upstream_transcript_variant                                                   |
| rs538213748 | intron_variant                                                                                     |
| rs538293176 | intron_variant                                                                                     |
| rs538302158 | intron_variant,genic_upstream_transcript_variant                                                   |
| rs538322092 | intron_variant                                                                                     |
| rs538345241 | intron_variant,genic_upstream_transcript_variant                                                   |
| rs538346198 | intron_variant,genic_upstream_transcript_variant                                                   |
| rs538362083 | intron_variant,genic_upstream_transcript_variant                                                   |
| rs538388519 | intron_variant,genic_downstream_transcript_variant                                                 |
| rs538458601 | intron_variant,genic_upstream_transcript_variant                                                   |
| rs538478134 | intron_variant                                                                                     |
| rs538497590 | 3_prime_UTR_variant,genic_downstream_transcript_variant,non_coding_transcript_variant              |
| rs538507410 | intron_variant                                                                                     |
| rs538514683 | intron_variant                                                                                     |
| rs538522890 | intron_variant                                                                                     |
| rs538538299 | intron_variant                                                                                     |
| rs538580541 | intron_variant,genic_upstream_transcript_variant                                                   |
| rs538608249 | intron_variant                                                                                     |
| rs538642016 | intron_variant                                                                                     |
| rs538645065 | intron_variant                                                                                     |
| rs538646878 | intron_variant                                                                                     |
| rs538652757 | intron_variant                                                                                     |
| rs538696118 | intron_variant,upstream_transcript_variant,genic_upstream_transcript_variant                       |
| rs538713845 | intron_variant,genic_downstream_transcript_variant                                                 |
| rs538734809 | intron_variant                                                                                     |
| rs538762716 | intron_variant                                                                                     |

|             |                                                                                                   |
|-------------|---------------------------------------------------------------------------------------------------|
| rs538766860 | intron_variant                                                                                    |
| rs538783374 | intron_variant                                                                                    |
| rs538828142 | intron_variant                                                                                    |
| rs538978672 | intron_variant,genic_downstream_transcript_variant,downstream_transcript_variant                  |
| rs538979718 | intron_variant,genic_upstream_transcript_variant                                                  |
| rs539042187 | intron_variant                                                                                    |
| rs539042514 | intron_variant,genic_downstream_transcript_variant                                                |
| rs539058009 | intron_variant,genic_upstream_transcript_variant                                                  |
| rs539058016 | intron_variant,genic_upstream_transcript_variant                                                  |
| rs539089132 | intron_variant,genic_downstream_transcript_variant                                                |
| rs539119346 | intron_variant,genic_upstream_transcript_variant                                                  |
| rs539139195 | intron_variant,genic_downstream_transcript_variant                                                |
| rs539168733 | intron_variant                                                                                    |
| rs539173271 | intron_variant,genic_downstream_transcript_variant                                                |
| rs539176417 | intron_variant,genic_upstream_transcript_variant                                                  |
| rs539190782 | intron_variant,genic_downstream_transcript_variant                                                |
| rs539218108 | intron_variant                                                                                    |
| rs539227343 | intron_variant,genic_upstream_transcript_variant                                                  |
| rs539233340 | intron_variant,genic_downstream_transcript_variant                                                |
| rs539257702 | upstream_transcript_variant,intron_variant,genic_upstream_transcript_variant,2KB_upstream_variant |
| rs539259338 | intron_variant                                                                                    |
| rs539268263 | intron_variant,genic_upstream_transcript_variant                                                  |
| rs539274678 | intron_variant,genic_upstream_transcript_variant                                                  |
| rs539322291 | intron_variant,genic_upstream_transcript_variant                                                  |
| rs539336123 | intron_variant                                                                                    |
| rs539349209 | intron_variant,genic_downstream_transcript_variant                                                |
| rs539357778 | intron_variant                                                                                    |
| rs539378584 | intron_variant,genic_downstream_transcript_variant                                                |
| rs539379996 | intron_variant,genic_upstream_transcript_variant                                                  |
| rs539382836 | intron_variant,genic_downstream_transcript_variant                                                |
| rs539397126 | intron_variant,genic_upstream_transcript_variant                                                  |
| rs539414123 | intron_variant                                                                                    |
| rs539434582 | intron_variant,genic_downstream_transcript_variant                                                |
| rs539444702 | intron_variant,genic_downstream_transcript_variant                                                |
| rs539453317 | intron_variant                                                                                    |
| rs539458298 | intron_variant,genic_upstream_transcript_variant                                                  |
| rs539465146 | intron_variant,genic_upstream_transcript_variant                                                  |
| rs539498686 | intron_variant                                                                                    |
| rs539522825 | intron_variant,upstream_transcript_variant,genic_upstream_transcript_variant,2KB_upstream_variant |
| rs539592745 | intron_variant,genic_downstream_transcript_variant                                                |
| rs539607054 | intron_variant,genic_upstream_transcript_variant                                                  |
| rs539638181 | intron_variant                                                                                    |
| rs539638302 | intron_variant,genic_upstream_transcript_variant                                                  |
| rs539661581 | intron_variant,genic_downstream_transcript_variant                                                |
| rs539668979 | intron_variant,genic_upstream_transcript_variant                                                  |
| rs539767695 | intron_variant                                                                                    |
| rs539787058 | intron_variant,genic_downstream_transcript_variant                                                |
| rs539814782 | intron_variant                                                                                    |
| rs539825890 | intron_variant,genic_downstream_transcript_variant                                                |
| rs539854084 | intron_variant,genic_upstream_transcript_variant                                                  |
| rs539881126 | intron_variant                                                                                    |
| rs539893711 | intron_variant,genic_upstream_transcript_variant                                                  |
| rs539911090 | intron_variant,genic_upstream_transcript_variant                                                  |
| rs540012349 | upstream_transcript_variant,intron_variant,genic_upstream_transcript_variant,2KB_upstream_variant |
| rs540019272 | intron_variant,genic_upstream_transcript_variant                                                  |
| rs540071984 | intron_variant                                                                                    |
| rs540090411 | intron_variant                                                                                    |
| rs540108460 | intron_variant,genic_upstream_transcript_variant                                                  |
| rs540140668 | intron_variant                                                                                    |
| rs540156351 | intron_variant                                                                                    |
| rs540156802 | intron_variant                                                                                    |
| rs540186017 | intron_variant,genic_upstream_transcript_variant                                                  |
| rs540186612 | intron_variant                                                                                    |
| rs540193128 | intron_variant                                                                                    |
| rs540239295 | intron_variant                                                                                    |
| rs540335032 | intron_variant,genic_upstream_transcript_variant                                                  |
| rs540389033 | intron_variant,genic_upstream_transcript_variant                                                  |
| rs540445584 | upstream_transcript_variant,intron_variant,genic_upstream_transcript_variant,2KB_upstream_variant |
| rs540452918 | intron_variant                                                                                    |
| rs540486654 | intron_variant,genic_downstream_transcript_variant                                                |
| rs540507995 | intron_variant,genic_upstream_transcript_variant                                                  |
| rs540540827 | 5_prime_UTR_variant,coding_sequence_variant,missense_variant,non_coding_transcript_variant        |
| rs540541578 | intron_variant,genic_upstream_transcript_variant                                                  |
| rs540563103 | intron_variant,genic_downstream_transcript_variant                                                |

|             |                                                                                                                         |
|-------------|-------------------------------------------------------------------------------------------------------------------------|
| rs540567863 | intron_variant,genic_upstream_transcript_variant                                                                        |
| rs540597455 | intron_variant                                                                                                          |
| rs540615069 | intron_variant,genic_upstream_transcript_variant                                                                        |
| rs540633686 | intron_variant                                                                                                          |
| rs540658374 | intron_variant,upstream_transcript_variant,genic_upstream_transcript_variant,2KB_upstream_variant                       |
| rs540681294 | intron_variant                                                                                                          |
| rs540702149 | intron_variant                                                                                                          |
| rs540729227 | intron_variant,genic_upstream_transcript_variant                                                                        |
| rs540731785 | intron_variant,genic_upstream_transcript_variant                                                                        |
| rs540738780 | intron_variant                                                                                                          |
| rs540802344 | intron_variant,genic_downstream_transcript_variant                                                                      |
| rs540804012 | intron_variant                                                                                                          |
| rs540821657 | intron_variant                                                                                                          |
| rs540827687 | upstream_transcript_variant,intron_variant,genic_upstream_transcript_variant,2KB_upstream_variant                       |
| rs540836980 | intron_variant,genic_upstream_transcript_variant                                                                        |
| rs540920940 | intron_variant,genic_upstream_transcript_variant                                                                        |
| rs540932687 | intron_variant,genic_downstream_transcript_variant                                                                      |
| rs540940807 | intron_variant                                                                                                          |
| rs540955782 | intron_variant,genic_upstream_transcript_variant                                                                        |
| rs540967590 | intron_variant,genic_downstream_transcript_variant                                                                      |
| rs541087395 | intron_variant,genic_downstream_transcript_variant                                                                      |
| rs541102523 | intron_variant,genic_upstream_transcript_variant                                                                        |
| rs541103845 | intron_variant                                                                                                          |
| rs541125654 | intron_variant,genic_upstream_transcript_variant                                                                        |
| rs541141654 | intron_variant,genic_upstream_transcript_variant                                                                        |
| rs541148448 | intron_variant,genic_upstream_transcript_variant                                                                        |
| rs541156628 | intron_variant,genic_downstream_transcript_variant                                                                      |
| rs541158141 | intron_variant                                                                                                          |
| rs541163928 | intron_variant,genic_downstream_transcript_variant                                                                      |
| rs541167749 | intron_variant,genic_downstream_transcript_variant                                                                      |
| rs541239627 | intron_variant,genic_upstream_transcript_variant                                                                        |
| rs541297306 | intron_variant,genic_upstream_transcript_variant                                                                        |
| rs541305999 | intron_variant,genic_upstream_transcript_variant                                                                        |
| rs541319710 | intron_variant,genic_upstream_transcript_variant                                                                        |
| rs541322928 | 3_prime_UTR_variant,genic_downstream_transcript_variant,downstream_transcript_variant,non_coding_transcript_variant     |
| rs541325277 | intron_variant                                                                                                          |
| rs541332743 | intron_variant,genic_upstream_transcript_variant                                                                        |
| rs541351766 | intron_variant,genic_upstream_transcript_variant                                                                        |
| rs541428716 | intron_variant,upstream_transcript_variant,genic_upstream_transcript_variant                                            |
| rs541433797 | intron_variant,genic_upstream_transcript_variant                                                                        |
| rs541441794 | 3_prime_UTR_variant,genic_downstream_transcript_variant,non_coding_transcript_variant                                   |
| rs541445179 | upstream_transcript_variant,intron_variant,genic_upstream_transcript_variant,2KB_upstream_variant                       |
| rs541464724 | intron_variant,genic_upstream_transcript_variant                                                                        |
| rs541474191 | intron_variant,genic_downstream_transcript_variant                                                                      |
| rs541486130 | intron_variant,genic_downstream_transcript_variant                                                                      |
| rs541493133 | intron_variant,genic_upstream_transcript_variant                                                                        |
| rs541497034 | intron_variant,genic_upstream_transcript_variant                                                                        |
| rs541529889 | intron_variant                                                                                                          |
| rs541539083 | intron_variant,genic_downstream_transcript_variant                                                                      |
| rs541544135 | intron_variant,genic_upstream_transcript_variant                                                                        |
| rs541553735 | intron_variant,genic_upstream_transcript_variant                                                                        |
| rs541553801 | intron_variant,genic_downstream_transcript_variant                                                                      |
| rs541564187 | intron_variant,genic_downstream_transcript_variant                                                                      |
| rs541623514 | intron_variant                                                                                                          |
| rs541657543 | intron_variant,genic_upstream_transcript_variant                                                                        |
| rs541684690 | intron_variant,genic_downstream_transcript_variant                                                                      |
| rs541693563 | intron_variant,genic_upstream_transcript_variant                                                                        |
| rs541704711 | intron_variant,genic_upstream_transcript_variant                                                                        |
| rs541734329 | intron_variant                                                                                                          |
| rs541746515 | intron_variant,genic_downstream_transcript_variant                                                                      |
| rs541766261 | intron_variant,genic_upstream_transcript_variant                                                                        |
| rs541832747 | intron_variant,upstream_transcript_variant,genic_upstream_transcript_variant,2KB_upstream_variant                       |
| rs541876545 | intron_variant                                                                                                          |
| rs541963413 | intron_variant                                                                                                          |
| rs541973573 | intron_variant                                                                                                          |
| rs542005099 | intron_variant,genic_upstream_transcript_variant                                                                        |
| rs542010513 | intron_variant,genic_upstream_transcript_variant                                                                        |
| rs542010602 | intron_variant                                                                                                          |
| rs542011488 | intron_variant                                                                                                          |
| rs542015591 | intron_variant,genic_downstream_transcript_variant                                                                      |
| rs542048185 | intron_variant                                                                                                          |
| rs542096684 | intron_variant                                                                                                          |
| rs542103167 | intron_variant,non_coding_transcript_variant,genic_upstream_transcript_variant,coding_sequence_variant,missense_variant |
| rs542109808 | intron_variant,genic_upstream_transcript_variant                                                                        |

|             |                                                                                                                           |
|-------------|---------------------------------------------------------------------------------------------------------------------------|
| rs542113335 | intron_variant                                                                                                            |
| rs542121884 | intron_variant,genetic_upstream_transcript_variant                                                                        |
| rs542133506 | intron_variant,genetic_downstream_transcript_variant                                                                      |
| rs542165170 | intron_variant,upstream_transcript_variant,genetic_upstream_transcript_variant,2KB_upstream_variant                       |
| rs542177937 | intron_variant                                                                                                            |
| rs542187443 | intron_variant,genetic_upstream_transcript_variant                                                                        |
| rs542210593 | intron_variant                                                                                                            |
| rs542251070 | intron_variant                                                                                                            |
| rs542267057 | intron_variant,non_coding_transcript_variant,genetic_upstream_transcript_variant,coding_sequence_variant,missense_variant |
| rs542271812 | 3_prime_UTR_variant,genetic_downstream_transcript_variant,non_coding_transcript_variant                                   |
| rs542282757 | intron_variant                                                                                                            |
| rs542296514 | intron_variant                                                                                                            |
| rs542402158 | 5_prime_UTR_variant,intron_variant                                                                                        |
| rs542440838 | intron_variant                                                                                                            |
| rs542456294 | 3_prime_UTR_variant,genetic_downstream_transcript_variant,non_coding_transcript_variant                                   |
| rs542490724 | intron_variant,genetic_upstream_transcript_variant                                                                        |
| rs542560043 | intron_variant                                                                                                            |
| rs542579914 | upstream_transcript_variant,intron_variant,genetic_upstream_transcript_variant,2KB_upstream_variant                       |
| rs542620288 | intron_variant                                                                                                            |
| rs542713188 | intron_variant                                                                                                            |
| rs542718741 | intron_variant                                                                                                            |
| rs542719315 | intron_variant                                                                                                            |
| rs542724954 | intron_variant                                                                                                            |
| rs542726958 | intron_variant,genetic_downstream_transcript_variant                                                                      |
| rs542750781 | intron_variant,genetic_upstream_transcript_variant                                                                        |
| rs542755535 | intron_variant                                                                                                            |
| rs542777524 | intron_variant,genetic_upstream_transcript_variant                                                                        |
| rs542790265 | intron_variant,genetic_downstream_transcript_variant                                                                      |
| rs542795808 | intron_variant,genetic_upstream_transcript_variant                                                                        |
| rs542840134 | intron_variant,genetic_upstream_transcript_variant                                                                        |
| rs542851962 | intron_variant                                                                                                            |
| rs542857662 | intron_variant,genetic_downstream_transcript_variant                                                                      |
| rs542883005 | intron_variant,genetic_downstream_transcript_variant                                                                      |
| rs542889141 | intron_variant                                                                                                            |
| rs542890757 | intron_variant                                                                                                            |
| rs542904678 | intron_variant,genetic_downstream_transcript_variant                                                                      |
| rs542934651 | intron_variant                                                                                                            |
| rs542982913 | intron_variant                                                                                                            |
| rs542987892 | intron_variant,genetic_upstream_transcript_variant                                                                        |
| rs543010238 | intron_variant                                                                                                            |
| rs543017759 | intron_variant                                                                                                            |
| rs543026979 | intron_variant,genetic_upstream_transcript_variant                                                                        |
| rs543088074 | intron_variant,genetic_upstream_transcript_variant                                                                        |
| rs543137641 | intron_variant                                                                                                            |
| rs543179640 | intron_variant,genetic_downstream_transcript_variant                                                                      |
| rs543182899 | intron_variant,genetic_downstream_transcript_variant                                                                      |
| rs543229800 | intron_variant,genetic_upstream_transcript_variant                                                                        |
| rs543253156 | intron_variant,genetic_upstream_transcript_variant                                                                        |
| rs543377449 | intron_variant,genetic_upstream_transcript_variant                                                                        |
| rs543409064 | intron_variant,genetic_upstream_transcript_variant                                                                        |
| rs543417900 | intron_variant,genetic_upstream_transcript_variant                                                                        |
| rs543471172 | intron_variant,genetic_downstream_transcript_variant                                                                      |
| rs543505292 | intron_variant,genetic_upstream_transcript_variant                                                                        |
| rs543506413 | intron_variant                                                                                                            |
| rs543519144 | intron_variant,genetic_upstream_transcript_variant                                                                        |
| rs543532836 | intron_variant,genetic_downstream_transcript_variant                                                                      |
| rs543553819 | intron_variant,genetic_downstream_transcript_variant                                                                      |
| rs543580693 | intron_variant,genetic_upstream_transcript_variant                                                                        |
| rs543581054 | intron_variant,genetic_upstream_transcript_variant                                                                        |
| rs543595746 | intron_variant,genetic_upstream_transcript_variant                                                                        |
| rs543607954 | intron_variant,genetic_upstream_transcript_variant                                                                        |
| rs543629579 | intron_variant,genetic_upstream_transcript_variant                                                                        |
| rs543632409 | intron_variant                                                                                                            |
| rs543650055 | 5_prime_UTR_variant,intron_variant,genetic_upstream_transcript_variant,non_coding_transcript_variant                      |
| rs543673515 | 3_prime_UTR_variant,genetic_downstream_transcript_variant,non_coding_transcript_variant                                   |
| rs543692626 | intron_variant,genetic_upstream_transcript_variant                                                                        |
| rs543719365 | intron_variant,genetic_upstream_transcript_variant                                                                        |
| rs543752526 | intron_variant,genetic_upstream_transcript_variant                                                                        |
| rs543756448 | intron_variant,genetic_upstream_transcript_variant                                                                        |
| rs543759686 | intron_variant,genetic_upstream_transcript_variant                                                                        |
| rs543766277 | intron_variant,genetic_downstream_transcript_variant                                                                      |
| rs543779397 | downstream_transcript_variant,500B_downstream_variant                                                                     |
| rs543788066 | intron_variant,genetic_downstream_transcript_variant                                                                      |
| rs543804679 | intron_variant,genetic_upstream_transcript_variant                                                                        |

|             |                                                                                                   |
|-------------|---------------------------------------------------------------------------------------------------|
| rs543805547 | intron_variant,genic_upstream_transcript_variant                                                  |
| rs543819035 | intron_variant,genic_upstream_transcript_variant                                                  |
| rs543833603 | intron_variant                                                                                    |
| rs543860463 | intron_variant,genic_downstream_transcript_variant                                                |
| rs543863288 | intron_variant                                                                                    |
| rs543864205 | intron_variant,genic_downstream_transcript_variant                                                |
| rs543865483 | intron_variant                                                                                    |
| rs543866349 | intron_variant,genic_upstream_transcript_variant                                                  |
| rs543884890 | intron_variant,genic_downstream_transcript_variant                                                |
| rs543915598 | intron_variant,genic_downstream_transcript_variant                                                |
| rs543948036 | intron_variant,genic_downstream_transcript_variant                                                |
| rs543948763 | intron_variant                                                                                    |
| rs543980820 | intron_variant,genic_upstream_transcript_variant                                                  |
| rs543995572 | intron_variant,genic_upstream_transcript_variant                                                  |
| rs543997725 | intron_variant                                                                                    |
| rs544075216 | intron_variant,genic_upstream_transcript_variant                                                  |
| rs544084654 | intron_variant,genic_downstream_transcript_variant                                                |
| rs544092676 | intron_variant,genic_upstream_transcript_variant                                                  |
| rs544113570 | intron_variant                                                                                    |
| rs544137936 | intron_variant,genic_upstream_transcript_variant                                                  |
| rs544219689 | upstream_transcript_variant,intron_variant,genic_upstream_transcript_variant,2KB_upstream_variant |
| rs544233796 | intron_variant                                                                                    |
| rs544237864 | intron_variant                                                                                    |
| rs544251725 | intron_variant,genic_upstream_transcript_variant                                                  |
| rs544259242 | intron_variant,genic_upstream_transcript_variant                                                  |
| rs544272319 | intron_variant                                                                                    |
| rs544290315 | intron_variant                                                                                    |
| rs544310866 | intron_variant                                                                                    |
| rs544313635 | intron_variant,genic_upstream_transcript_variant                                                  |
| rs544360809 | intron_variant                                                                                    |
| rs544389872 | intron_variant,genic_downstream_transcript_variant                                                |
| rs544431495 | intron_variant,genic_upstream_transcript_variant                                                  |
| rs544488642 | intron_variant,genic_downstream_transcript_variant                                                |
| rs544519485 | intron_variant                                                                                    |
| rs544570215 | intron_variant,genic_upstream_transcript_variant                                                  |
| rs544577796 | intron_variant                                                                                    |
| rs544583021 | intron_variant,genic_upstream_transcript_variant                                                  |
| rs544657682 | intron_variant,genic_upstream_transcript_variant                                                  |
| rs544686662 | intron_variant                                                                                    |
| rs544695908 | intron_variant                                                                                    |
| rs544720855 | intron_variant,genic_upstream_transcript_variant                                                  |
| rs544773980 | intron_variant                                                                                    |
| rs544791921 | intron_variant,genic_downstream_transcript_variant                                                |
| rs544840423 | intron_variant,genic_downstream_transcript_variant                                                |
| rs544880662 | intron_variant                                                                                    |
| rs544915846 | intron_variant,genic_upstream_transcript_variant,non_coding_transcript_variant                    |
| rs544923324 | intron_variant,genic_downstream_transcript_variant                                                |
| rs544959126 | intron_variant                                                                                    |
| rs544969603 | intron_variant                                                                                    |
| rs544969987 | intron_variant,genic_downstream_transcript_variant                                                |
| rs544970146 | 3_prime_UTR_variant,genic_downstream_transcript_variant,non_coding_transcript_variant             |
| rs545006646 | intron_variant                                                                                    |
| rs545026281 | intron_variant,genic_upstream_transcript_variant                                                  |
| rs545028275 | intron_variant                                                                                    |
| rs545051967 | 3_prime_UTR_variant,genic_downstream_transcript_variant,non_coding_transcript_variant             |
| rs545075758 | intron_variant                                                                                    |
| rs545140983 | intron_variant,genic_downstream_transcript_variant                                                |
| rs545157033 | intron_variant                                                                                    |
| rs545226359 | intron_variant,genic_downstream_transcript_variant                                                |
| rs545265895 | intron_variant,genic_upstream_transcript_variant                                                  |
| rs545274704 | intron_variant                                                                                    |
| rs545280060 | intron_variant,genic_downstream_transcript_variant                                                |
| rs545282287 | intron_variant                                                                                    |
| rs545285428 | intron_variant                                                                                    |
| rs545365035 | intron_variant,genic_upstream_transcript_variant                                                  |
| rs545381820 | intron_variant,genic_downstream_transcript_variant                                                |
| rs545415751 | intron_variant,genic_downstream_transcript_variant                                                |
| rs545419616 | intron_variant,upstream_transcript_variant,genic_upstream_transcript_variant                      |
| rs545444524 | intron_variant,genic_upstream_transcript_variant                                                  |
| rs545450460 | intron_variant,genic_downstream_transcript_variant                                                |
| rs545458374 | intron_variant,genic_upstream_transcript_variant                                                  |
| rs545477729 | intron_variant,genic_downstream_transcript_variant                                                |
| rs545496806 | intron_variant,genic_upstream_transcript_variant                                                  |
| rs545512167 | intron_variant                                                                                    |

|             |                                                                                       |
|-------------|---------------------------------------------------------------------------------------|
| rs545512490 | intron_variant                                                                        |
| rs545556735 | intron_variant                                                                        |
| rs545591604 | intron_variant                                                                        |
| rs545611355 | intron_variant,genic_upstream_transcript_variant                                      |
| rs545620910 | intron_variant,genic_downstream_transcript_variant                                    |
| rs545671919 | intron_variant,genic_upstream_transcript_variant                                      |
| rs545686303 | intron_variant                                                                        |
| rs545688660 | intron_variant                                                                        |
| rs545801291 | intron_variant,genic_upstream_transcript_variant                                      |
| rs545809899 | intron_variant,genic_upstream_transcript_variant                                      |
| rs545835271 | intron_variant,genic_downstream_transcript_variant                                    |
| rs545860655 | 3_prime_UTR_variant,genic_downstream_transcript_variant,non_coding_transcript_variant |
| rs545901249 | intron_variant,genic_upstream_transcript_variant                                      |
| rs545904481 | intron_variant                                                                        |
| rs545938651 | 3_prime_UTR_variant,genic_downstream_transcript_variant,non_coding_transcript_variant |
| rs545965765 | intron_variant,genic_upstream_transcript_variant                                      |
| rs546073297 | intron_variant                                                                        |
| rs546076294 | genic_upstream_transcript_variant,intron_variant                                      |
| rs546083703 | intron_variant                                                                        |
| rs546113994 | genic_upstream_transcript_variant,intron_variant                                      |
| rs546135716 | genic_upstream_transcript_variant,intron_variant                                      |
| rs546137148 | genic_upstream_transcript_variant,intron_variant                                      |
| rs546145995 | genic_upstream_transcript_variant,upstream_transcript_variant,intron_variant          |
| rs546164980 | genic_upstream_transcript_variant,intron_variant                                      |
| rs546177996 | intron_variant                                                                        |
| rs546199787 | intron_variant                                                                        |
| rs546223463 | genic_downstream_transcript_variant,intron_variant                                    |
| rs546264111 | intron_variant                                                                        |
| rs546306912 | intron_variant                                                                        |
| rs546322761 | genic_upstream_transcript_variant,intron_variant                                      |
| rs546336511 | genic_downstream_transcript_variant,intron_variant                                    |
| rs546362587 | intron_variant                                                                        |
| rs546373644 | genic_upstream_transcript_variant,intron_variant                                      |
| rs546382970 | genic_downstream_transcript_variant,intron_variant                                    |
| rs546433040 | genic_upstream_transcript_variant,intron_variant                                      |
| rs546444252 | 3_prime_UTR_variant,genic_downstream_transcript_variant,non_coding_transcript_variant |
| rs546445876 | genic_upstream_transcript_variant,intron_variant                                      |
| rs546472619 | genic_upstream_transcript_variant,intron_variant                                      |
| rs546476613 | genic_downstream_transcript_variant,intron_variant                                    |
| rs546492365 | genic_upstream_transcript_variant,intron_variant                                      |
| rs546494643 | genic_upstream_transcript_variant,intron_variant                                      |
| rs546510768 | intron_variant                                                                        |
| rs546514657 | genic_upstream_transcript_variant,intron_variant                                      |
| rs546520309 | genic_upstream_transcript_variant,intron_variant                                      |
| rs546531927 | intron_variant                                                                        |
| rs546534435 | intron_variant                                                                        |
| rs546559782 | missense_variant,coding_sequence_variant,non_coding_transcript_variant                |
| rs546594890 | intron_variant                                                                        |
| rs546600765 | intron_variant                                                                        |
| rs546631978 | intron_variant                                                                        |
| rs546657400 | intron_variant                                                                        |
| rs546681833 | genic_downstream_transcript_variant,intron_variant                                    |
| rs546688682 | intron_variant                                                                        |
| rs546733107 | genic_upstream_transcript_variant,intron_variant                                      |
| rs546747979 | genic_upstream_transcript_variant,intron_variant                                      |
| rs546754403 | genic_upstream_transcript_variant,intron_variant                                      |
| rs546772153 | genic_downstream_transcript_variant,intron_variant                                    |
| rs546851434 | genic_upstream_transcript_variant,intron_variant                                      |
| rs546857975 | genic_downstream_transcript_variant,intron_variant                                    |
| rs546859360 | genic_downstream_transcript_variant,intron_variant                                    |
| rs546889837 | genic_upstream_transcript_variant,intron_variant                                      |
| rs546922710 | intron_variant                                                                        |
| rs546945259 | genic_downstream_transcript_variant,intron_variant                                    |
| rs546959941 | intron_variant                                                                        |
| rs546962531 | intron_variant                                                                        |
| rs546965089 | genic_downstream_transcript_variant,intron_variant                                    |
| rs546997065 | intron_variant                                                                        |
| rs547006241 | genic_upstream_transcript_variant,intron_variant                                      |
| rs547008064 | genic_upstream_transcript_variant,intron_variant                                      |
| rs547050112 | genic_downstream_transcript_variant,intron_variant                                    |
| rs547071825 | 3_prime_UTR_variant,genic_downstream_transcript_variant,non_coding_transcript_variant |
| rs547103028 | intron_variant                                                                        |
| rs547143978 | genic_upstream_transcript_variant,intron_variant                                      |
| rs547151698 | genic_downstream_transcript_variant,intron_variant                                    |

|             |                                                                                                   |
|-------------|---------------------------------------------------------------------------------------------------|
| rs547167668 | genic_downstream_transcript_variant,intron_variant                                                |
| rs547181389 | genic_upstream_transcript_variant,intron_variant                                                  |
| rs547182924 | genic_upstream_transcript_variant,2KB_upstream_variant,upstream_transcript_variant,intron_variant |
| rs547209874 | intron_variant                                                                                    |
| rs547218935 | intron_variant                                                                                    |
| rs547245502 | genic_upstream_transcript_variant,intron_variant                                                  |
| rs547248517 | intron_variant                                                                                    |
| rs547255317 | genic_downstream_transcript_variant,intron_variant                                                |
| rs547255808 | intron_variant                                                                                    |
| rs547284035 | genic_upstream_transcript_variant,intron_variant                                                  |
| rs547297421 | intron_variant                                                                                    |
| rs547320299 | intron_variant                                                                                    |
| rs547348808 | genic_upstream_transcript_variant,intron_variant                                                  |
| rs547400075 | 3_prime_UTR_variant,genic_downstream_transcript_variant,non_coding_transcript_variant             |
| rs547412543 | upstream_transcript_variant,genic_upstream_transcript_variant,2KB_upstream_variant,intron_variant |
| rs547428537 | genic_upstream_transcript_variant,intron_variant                                                  |
| rs547457270 | genic_upstream_transcript_variant,intron_variant                                                  |
| rs547531516 | genic_downstream_transcript_variant,intron_variant                                                |
| rs547532029 | intron_variant                                                                                    |
| rs547571299 | genic_upstream_transcript_variant,intron_variant                                                  |
| rs547580627 | genic_upstream_transcript_variant,intron_variant                                                  |
| rs547615728 | intron_variant                                                                                    |
| rs547627648 | genic_upstream_transcript_variant,intron_variant                                                  |
| rs547644833 | intron_variant                                                                                    |
| rs547668588 | genic_downstream_transcript_variant,intron_variant                                                |
| rs547746073 | upstream_transcript_variant,genic_upstream_transcript_variant,2KB_upstream_variant,intron_variant |
| rs547777397 | missense_variant,coding_sequence_variant,non_coding_transcript_variant                            |
| rs547794061 | genic_upstream_transcript_variant,intron_variant                                                  |
| rs547795257 | genic_upstream_transcript_variant,intron_variant                                                  |
| rs547856213 | genic_upstream_transcript_variant,intron_variant                                                  |
| rs547862987 | genic_upstream_transcript_variant,2KB_upstream_variant,upstream_transcript_variant,intron_variant |
| rs547903136 | intron_variant                                                                                    |
| rs547911723 | intron_variant                                                                                    |
| rs547919215 | genic_upstream_transcript_variant,intron_variant                                                  |
| rs547920218 | genic_downstream_transcript_variant,intron_variant                                                |
| rs547928418 | genic_upstream_transcript_variant,2KB_upstream_variant,upstream_transcript_variant,intron_variant |
| rs547930175 | genic_upstream_transcript_variant,intron_variant                                                  |
| rs547975148 | genic_upstream_transcript_variant,intron_variant                                                  |
| rs547981313 | intron_variant                                                                                    |
| rs548018177 | intron_variant                                                                                    |
| rs548086562 | intron_variant                                                                                    |
| rs548105693 | intron_variant                                                                                    |
| rs548108908 | intron_variant                                                                                    |
| rs548134093 | intron_variant                                                                                    |
| rs548145290 | intron_variant                                                                                    |
| rs548154106 | genic_upstream_transcript_variant,intron_variant                                                  |
| rs548197437 | genic_upstream_transcript_variant,intron_variant                                                  |
| rs548199212 | genic_upstream_transcript_variant,intron_variant                                                  |
| rs548214476 | genic_upstream_transcript_variant,intron_variant                                                  |
| rs548224167 | intron_variant                                                                                    |
| rs548251385 | upstream_transcript_variant,genic_upstream_transcript_variant,2KB_upstream_variant,intron_variant |
| rs548311809 | genic_upstream_transcript_variant,intron_variant                                                  |
| rs548339164 | genic_upstream_transcript_variant,intron_variant                                                  |
| rs548358252 | genic_downstream_transcript_variant,intron_variant                                                |
| rs548390884 | genic_upstream_transcript_variant,intron_variant                                                  |
| rs548403312 | genic_upstream_transcript_variant,intron_variant                                                  |
| rs548489508 | intron_variant                                                                                    |
| rs548502026 | intron_variant                                                                                    |
| rs548503839 | genic_upstream_transcript_variant,intron_variant                                                  |
| rs548525517 | intron_variant                                                                                    |
| rs548580853 | genic_downstream_transcript_variant,intron_variant                                                |
| rs548683119 | intron_variant                                                                                    |
| rs548700555 | genic_upstream_transcript_variant,intron_variant                                                  |
| rs548704094 | genic_upstream_transcript_variant,intron_variant                                                  |
| rs548773799 | genic_upstream_transcript_variant,intron_variant                                                  |
| rs548785730 | intron_variant                                                                                    |
| rs548789876 | genic_upstream_transcript_variant,intron_variant                                                  |
| rs548794283 | genic_upstream_transcript_variant,upstream_transcript_variant,intron_variant                      |
| rs548824068 | intron_variant                                                                                    |
| rs548840877 | genic_upstream_transcript_variant,intron_variant                                                  |
| rs548860509 | genic_downstream_transcript_variant,intron_variant                                                |
| rs548880210 | intron_variant                                                                                    |
| rs548897187 | genic_downstream_transcript_variant,intron_variant                                                |
| rs548939428 | genic_downstream_transcript_variant,intron_variant                                                |

|             |                                                                                                   |
|-------------|---------------------------------------------------------------------------------------------------|
| rs548953381 | genic_upstream_transcript_variant,intron_variant                                                  |
| rs548958127 | genic_downstream_transcript_variant,intron_variant                                                |
| rs548974533 | genic_downstream_transcript_variant,intron_variant                                                |
| rs549043010 | intron_variant                                                                                    |
| rs549056527 | intron_variant                                                                                    |
| rs549056620 | intron_variant                                                                                    |
| rs549062554 | genic_downstream_transcript_variant,intron_variant                                                |
| rs549093290 | intron_variant                                                                                    |
| rs549099286 | genic_downstream_transcript_variant,intron_variant                                                |
| rs549112422 | intron_variant                                                                                    |
| rs549126385 | genic_downstream_transcript_variant,intron_variant                                                |
| rs549140685 | genic_downstream_transcript_variant,intron_variant                                                |
| rs549145824 | genic_upstream_transcript_variant,intron_variant                                                  |
| rs549146218 | intron_variant                                                                                    |
| rs549169361 | genic_upstream_transcript_variant,intron_variant                                                  |
| rs549174351 | intron_variant                                                                                    |
| rs549196468 | genic_upstream_transcript_variant,intron_variant                                                  |
| rs549230483 | genic_downstream_transcript_variant,intron_variant                                                |
| rs549233899 | genic_upstream_transcript_variant,intron_variant                                                  |
| rs549266450 | genic_upstream_transcript_variant,intron_variant                                                  |
| rs549316062 | genic_downstream_transcript_variant,intron_variant                                                |
| rs549320063 | genic_downstream_transcript_variant,intron_variant                                                |
| rs549325630 | intron_variant                                                                                    |
| rs549344138 | genic_upstream_transcript_variant,intron_variant                                                  |
| rs549371468 | intron_variant                                                                                    |
| rs549376289 | genic_downstream_transcript_variant,intron_variant                                                |
| rs549398651 | intron_variant                                                                                    |
| rs549454527 | intron_variant                                                                                    |
| rs549466632 | genic_upstream_transcript_variant,intron_variant                                                  |
| rs549471394 | genic_upstream_transcript_variant,intron_variant                                                  |
| rs549491658 | intron_variant                                                                                    |
| rs549496549 | genic_upstream_transcript_variant,intron_variant                                                  |
| rs549552612 | genic_downstream_transcript_variant,intron_variant                                                |
| rs549552643 | genic_downstream_transcript_variant,intron_variant                                                |
| rs549554011 | intron_variant                                                                                    |
| rs549622055 | genic_upstream_transcript_variant,intron_variant                                                  |
| rs549631830 | intron_variant                                                                                    |
| rs549657766 | genic_downstream_transcript_variant,intron_variant                                                |
| rs549697617 | intron_variant                                                                                    |
| rs549718057 | intron_variant                                                                                    |
| rs549733487 | genic_upstream_transcript_variant,intron_variant                                                  |
| rs549750541 | intron_variant                                                                                    |
| rs549779706 | genic_upstream_transcript_variant,intron_variant                                                  |
| rs549785530 | genic_upstream_transcript_variant,intron_variant                                                  |
| rs549829223 | genic_upstream_transcript_variant,intron_variant                                                  |
| rs549863508 | genic_upstream_transcript_variant,intron_variant                                                  |
| rs549874584 | intron_variant                                                                                    |
| rs549911000 | genic_downstream_transcript_variant,intron_variant                                                |
| rs549919945 | intron_variant                                                                                    |
| rs549938487 | upstream_transcript_variant,genic_upstream_transcript_variant,2KB_upstream_variant,intron_variant |
| rs549953371 | intron_variant                                                                                    |
| rs549958646 | genic_downstream_transcript_variant,intron_variant                                                |
| rs549959989 | genic_upstream_transcript_variant,intron_variant                                                  |
| rs549988101 | intron_variant                                                                                    |
| rs549989941 | genic_upstream_transcript_variant,intron_variant                                                  |
| rs550030690 | genic_upstream_transcript_variant,intron_variant                                                  |
| rs550038852 | intron_variant                                                                                    |
| rs550082986 | upstream_transcript_variant,genic_upstream_transcript_variant,2KB_upstream_variant,intron_variant |
| rs550137929 | genic_upstream_transcript_variant,intron_variant                                                  |
| rs550162551 | genic_downstream_transcript_variant,intron_variant                                                |
| rs550185871 | genic_downstream_transcript_variant,intron_variant                                                |
| rs550225195 | genic_upstream_transcript_variant,intron_variant                                                  |
| rs550252261 | intron_variant                                                                                    |
| rs550278856 | genic_upstream_transcript_variant,intron_variant                                                  |
| rs550286635 | genic_upstream_transcript_variant,intron_variant                                                  |
| rs550288023 | genic_downstream_transcript_variant,intron_variant                                                |
| rs550290947 | genic_upstream_transcript_variant,intron_variant                                                  |
| rs550291205 | genic_upstream_transcript_variant,intron_variant                                                  |
| rs550303394 | genic_upstream_transcript_variant,intron_variant                                                  |
| rs550313513 | intron_variant                                                                                    |
| rs550398988 | genic_upstream_transcript_variant,intron_variant                                                  |
| rs550416576 | genic_upstream_transcript_variant,upstream_transcript_variant,intron_variant                      |
| rs550462929 | genic_upstream_transcript_variant,intron_variant                                                  |
| rs550476990 | intron_variant                                                                                    |

|             |                                                                                                   |
|-------------|---------------------------------------------------------------------------------------------------|
| rs550513490 | genic_upstream_transcript_variant,intron_variant                                                  |
| rs550514111 | intron_variant                                                                                    |
| rs550519644 | genic_upstream_transcript_variant,intron_variant                                                  |
| rs550599626 | intron_variant                                                                                    |
| rs550630963 | genic_downstream_transcript_variant,intron_variant                                                |
| rs550645306 | intron_variant                                                                                    |
| rs550682942 | intron_variant                                                                                    |
| rs550689538 | upstream_transcript_variant,genic_upstream_transcript_variant,2KB_upstream_variant,intron_variant |
| rs550696561 | genic_downstream_transcript_variant,intron_variant                                                |
| rs550703269 | genic_upstream_transcript_variant,intron_variant                                                  |
| rs550718913 | intron_variant                                                                                    |
| rs550729548 | missense_variant,coding_sequence_variant,intron_variant                                           |
| rs550734562 | genic_upstream_transcript_variant,intron_variant                                                  |
| rs550738287 | intron_variant                                                                                    |
| rs550757726 | intron_variant                                                                                    |
| rs550777044 | intron_variant                                                                                    |
| rs550777640 | intron_variant                                                                                    |
| rs550791264 | intron_variant                                                                                    |
| rs550857497 | genic_upstream_transcript_variant,intron_variant                                                  |
| rs550884742 | intron_variant                                                                                    |
| rs550909916 | genic_downstream_transcript_variant,intron_variant                                                |
| rs550934870 | intron_variant                                                                                    |
| rs550972014 | intron_variant                                                                                    |
| rs551007657 | genic_upstream_transcript_variant,intron_variant                                                  |
| rs551059658 | intron_variant                                                                                    |
| rs551063692 | genic_downstream_transcript_variant,intron_variant                                                |
| rs551105133 | genic_downstream_transcript_variant,intron_variant                                                |
| rs551126161 | intron_variant                                                                                    |
| rs551180139 | genic_upstream_transcript_variant,intron_variant                                                  |
| rs551181619 | genic_upstream_transcript_variant,intron_variant                                                  |
| rs551206309 | genic_upstream_transcript_variant,intron_variant                                                  |
| rs551261322 | 5_prime_UTR_variant,genic_upstream_transcript_variant,upstream_transcript_variant,intron_variant  |
| rs551264352 | genic_upstream_transcript_variant,intron_variant                                                  |
| rs551265020 | genic_upstream_transcript_variant,intron_variant                                                  |
| rs551298214 | genic_downstream_transcript_variant,intron_variant                                                |
| rs551325522 | intron_variant                                                                                    |
| rs551379728 | genic_downstream_transcript_variant,intron_variant                                                |
| rs551383880 | genic_upstream_transcript_variant,intron_variant                                                  |
| rs551411613 | genic_upstream_transcript_variant,intron_variant                                                  |
| rs551451678 | intron_variant                                                                                    |
| rs551452197 | intron_variant                                                                                    |
| rs551471351 | genic_downstream_transcript_variant,intron_variant                                                |
| rs551488643 | intron_variant                                                                                    |
| rs551490256 | intron_variant                                                                                    |
| rs551506116 | genic_upstream_transcript_variant,intron_variant                                                  |
| rs551508074 | 3_prime_UTR_variant,genic_downstream_transcript_variant,non_coding_transcript_variant             |
| rs551511079 | genic_upstream_transcript_variant,intron_variant                                                  |
| rs551513741 | genic_upstream_transcript_variant,intron_variant                                                  |
| rs551541415 | genic_downstream_transcript_variant,intron_variant                                                |
| rs551550460 | genic_downstream_transcript_variant,intron_variant                                                |
| rs551566673 | genic_upstream_transcript_variant,intron_variant                                                  |
| rs551570313 | genic_downstream_transcript_variant,intron_variant                                                |
| rs551600216 | intron_variant                                                                                    |
| rs551605356 | genic_upstream_transcript_variant,intron_variant                                                  |
| rs551628216 | genic_downstream_transcript_variant,intron_variant                                                |
| rs551631168 | genic_downstream_transcript_variant,intron_variant                                                |
| rs551636614 | genic_downstream_transcript_variant,intron_variant                                                |
| rs551657817 | intron_variant                                                                                    |
| rs551664843 | genic_upstream_transcript_variant,intron_variant                                                  |
| rs551681261 | intron_variant                                                                                    |
| rs551699477 | genic_upstream_transcript_variant,intron_variant                                                  |
| rs551777558 | genic_upstream_transcript_variant,intron_variant                                                  |
| rs551801700 | genic_upstream_transcript_variant,intron_variant                                                  |
| rs551839201 | genic_upstream_transcript_variant,intron_variant                                                  |
| rs551885186 | genic_upstream_transcript_variant,intron_variant                                                  |
| rs551898360 | genic_downstream_transcript_variant,intron_variant                                                |
| rs551919023 | intron_variant                                                                                    |
| rs551920140 | genic_downstream_transcript_variant,intron_variant                                                |
| rs551956067 | intron_variant                                                                                    |
| rs551976686 | intron_variant                                                                                    |
| rs552028655 | intron_variant                                                                                    |
| rs552043744 | intron_variant                                                                                    |
| rs552054530 | intron_variant                                                                                    |
| rs552059644 | intron_variant                                                                                    |

|             |                                                                                                   |
|-------------|---------------------------------------------------------------------------------------------------|
| rs552067474 | genic_upstream_transcript_variant,intron_variant                                                  |
| rs552181100 | genic_upstream_transcript_variant,intron_variant                                                  |
| rs552183471 | intron_variant                                                                                    |
| rs552206217 | genic_upstream_transcript_variant,intron_variant                                                  |
| rs552207024 | intron_variant                                                                                    |
| rs552218749 | genic_upstream_transcript_variant,intron_variant                                                  |
| rs552242554 | genic_downstream_transcript_variant,intron_variant                                                |
| rs552248968 | genic_upstream_transcript_variant,intron_variant                                                  |
| rs552291696 | genic_upstream_transcript_variant,intron_variant                                                  |
| rs552321692 | genic_upstream_transcript_variant,intron_variant                                                  |
| rs552323933 | intron_variant                                                                                    |
| rs552336950 | intron_variant                                                                                    |
| rs552346808 | genic_downstream_transcript_variant,intron_variant                                                |
| rs552374823 | intron_variant                                                                                    |
| rs552435121 | genic_downstream_transcript_variant,intron_variant                                                |
| rs552454472 | genic_upstream_transcript_variant,intron_variant                                                  |
| rs552463156 | genic_upstream_transcript_variant,intron_variant                                                  |
| rs552517211 | intron_variant                                                                                    |
| rs552517794 | genic_upstream_transcript_variant,intron_variant                                                  |
| rs552532940 | intron_variant                                                                                    |
| rs552595360 | genic_upstream_transcript_variant,intron_variant                                                  |
| rs552604784 | genic_upstream_transcript_variant,intron_variant                                                  |
| rs552621661 | genic_downstream_transcript_variant,intron_variant                                                |
| rs552625914 | intron_variant                                                                                    |
| rs552658735 | intron_variant                                                                                    |
| rs552671634 | genic_upstream_transcript_variant,intron_variant                                                  |
| rs552678010 | intron_variant                                                                                    |
| rs552772997 | intron_variant                                                                                    |
| rs552775944 | genic_upstream_transcript_variant,intron_variant                                                  |
| rs552831805 | genic_upstream_transcript_variant,intron_variant                                                  |
| rs552871115 | intron_variant                                                                                    |
| rs552888738 | genic_downstream_transcript_variant,intron_variant                                                |
| rs552904563 | genic_downstream_transcript_variant,intron_variant                                                |
| rs552929190 | genic_downstream_transcript_variant,intron_variant                                                |
| rs552953455 | missense_variant,coding_sequence_variant,intron_variant                                           |
| rs552980762 | genic_upstream_transcript_variant,intron_variant                                                  |
| rs552985441 | intron_variant                                                                                    |
| rs553027074 | intron_variant                                                                                    |
| rs553049743 | intron_variant                                                                                    |
| rs553074721 | genic_downstream_transcript_variant,intron_variant                                                |
| rs553075022 | intron_variant                                                                                    |
| rs553086613 | intron_variant                                                                                    |
| rs553092655 | genic_downstream_transcript_variant,intron_variant                                                |
| rs553098188 | genic_upstream_transcript_variant,intron_variant                                                  |
| rs553166868 | genic_upstream_transcript_variant,intron_variant                                                  |
| rs553185323 | genic_upstream_transcript_variant,intron_variant                                                  |
| rs553190334 | intron_variant                                                                                    |
| rs553197725 | genic_upstream_transcript_variant,intron_variant                                                  |
| rs553207008 | genic_downstream_transcript_variant,downstream_transcript_variant,intron_variant                  |
| rs553210156 | genic_upstream_transcript_variant,2KB_upstream_variant,upstream_transcript_variant,intron_variant |
| rs553278249 | intron_variant                                                                                    |
| rs553304687 | genic_upstream_transcript_variant,upstream_transcript_variant,intron_variant                      |
| rs553322810 | genic_upstream_transcript_variant,intron_variant                                                  |
| rs553344089 | genic_downstream_transcript_variant,intron_variant                                                |
| rs553355112 | genic_upstream_transcript_variant,2KB_upstream_variant,upstream_transcript_variant,intron_variant |
| rs553375578 | intron_variant                                                                                    |
| rs553402575 | genic_downstream_transcript_variant,intron_variant                                                |
| rs553416664 | genic_upstream_transcript_variant,intron_variant                                                  |
| rs553439408 | genic_downstream_transcript_variant,intron_variant                                                |
| rs553445059 | genic_downstream_transcript_variant,intron_variant                                                |
| rs553456683 | genic_upstream_transcript_variant,intron_variant                                                  |
| rs553487134 | intron_variant                                                                                    |
| rs553496094 | intron_variant                                                                                    |
| rs553518087 | genic_upstream_transcript_variant,intron_variant                                                  |
| rs553548043 | intron_variant                                                                                    |
| rs553581931 | intron_variant                                                                                    |
| rs553629628 | intron_variant                                                                                    |
| rs553631537 | genic_upstream_transcript_variant,intron_variant                                                  |
| rs553692920 | genic_upstream_transcript_variant,intron_variant                                                  |
| rs553719252 | genic_downstream_transcript_variant,intron_variant                                                |
| rs553729006 | genic_upstream_transcript_variant,intron_variant                                                  |
| rs553745206 | 3_prime_UTR_variant,genic_downstream_transcript_variant,non_coding_transcript_variant             |
| rs553774616 | intron_variant                                                                                    |
| rs553816126 | genic_upstream_transcript_variant,intron_variant                                                  |

|             |                                                                                                    |
|-------------|----------------------------------------------------------------------------------------------------|
| rs553864000 | intron_variant                                                                                     |
| rs553925927 | genic_upstream_transcript_variant,intron_variant                                                   |
| rs553926099 | genic_upstream_transcript_variant,intron_variant                                                   |
| rs553926132 | genic_upstream_transcript_variant,intron_variant                                                   |
| rs553976691 | genic_upstream_transcript_variant,intron_variant                                                   |
| rs554061265 | downstream_transcript_variant,500B_downstream_variant                                              |
| rs554072150 | genic_upstream_transcript_variant,intron_variant                                                   |
| rs554081598 | intron_variant                                                                                     |
| rs554091190 | genic_upstream_transcript_variant,intron_variant                                                   |
| rs554167410 | intron_variant                                                                                     |
| rs554170963 | intron_variant                                                                                     |
| rs554196587 | intron_variant                                                                                     |
| rs554220373 | intron_variant                                                                                     |
| rs554286914 | intron_variant                                                                                     |
| rs554313324 | intron_variant                                                                                     |
| rs554314432 | genic_upstream_transcript_variant,intron_variant                                                   |
| rs554374555 | genic_downstream_transcript_variant,intron_variant                                                 |
| rs554438960 | intron_variant                                                                                     |
| rs554475336 | genic_downstream_transcript_variant,intron_variant                                                 |
| rs554477707 | intron_variant                                                                                     |
| rs554499802 | intron_variant                                                                                     |
| rs554542833 | intron_variant                                                                                     |
| rs554542860 | intron_variant                                                                                     |
| rs554585191 | intron_variant                                                                                     |
| rs554586684 | intron_variant                                                                                     |
| rs554628410 | intron_variant                                                                                     |
| rs554643413 | intron_variant                                                                                     |
| rs554666067 | intron_variant                                                                                     |
| rs554690944 | upstream_transcript_variant,genic_upstream_transcript_variant,2KB_upstream_variant,intron_variant  |
| rs554699424 | intron_variant                                                                                     |
| rs554748853 | genic_upstream_transcript_variant,intron_variant                                                   |
| rs554810103 | genic_upstream_transcript_variant,intron_variant                                                   |
| rs554833287 | genic_downstream_transcript_variant,intron_variant                                                 |
| rs554844771 | intron_variant                                                                                     |
| rs554900106 | intron_variant                                                                                     |
| rs554917256 | genic_upstream_transcript_variant,intron_variant                                                   |
| rs554965144 | intron_variant                                                                                     |
| rs554970208 | genic_upstream_transcript_variant,intron_variant                                                   |
| rs554984524 | intron_variant                                                                                     |
| rs555010557 | intron_variant                                                                                     |
| rs555011707 | 5_prime_UTR_variant,genic_upstream_transcript_variant,intron_variant,non_coding_transcript_variant |
| rs555019025 | genic_downstream_transcript_variant,intron_variant                                                 |
| rs555026756 | genic_upstream_transcript_variant,intron_variant                                                   |
| rs555066820 | genic_downstream_transcript_variant,intron_variant                                                 |
| rs555073315 | genic_upstream_transcript_variant,2KB_upstream_variant,upstream_transcript_variant,intron_variant  |
| rs555103956 | genic_downstream_transcript_variant,intron_variant                                                 |
| rs555110965 | genic_upstream_transcript_variant,intron_variant                                                   |
| rs555165461 | intron_variant                                                                                     |
| rs555165777 | intron_variant                                                                                     |
| rs555170362 | genic_upstream_transcript_variant,intron_variant                                                   |
| rs555185364 | genic_upstream_transcript_variant,intron_variant                                                   |
| rs555288487 | intron_variant                                                                                     |
| rs555428093 | genic_upstream_transcript_variant,intron_variant                                                   |
| rs555443453 | intron_variant                                                                                     |
| rs555466300 | genic_downstream_transcript_variant,intron_variant                                                 |
| rs555469152 | intron_variant                                                                                     |
| rs555487099 | genic_upstream_transcript_variant,intron_variant                                                   |
| rs555582967 | genic_upstream_transcript_variant,intron_variant                                                   |
| rs555583743 | genic_upstream_transcript_variant,intron_variant                                                   |
| rs555612942 | genic_downstream_transcript_variant,intron_variant                                                 |
| rs555640115 | intron_variant                                                                                     |
| rs555644251 | genic_upstream_transcript_variant,intron_variant                                                   |
| rs555649773 | genic_downstream_transcript_variant,intron_variant                                                 |
| rs555677632 | intron_variant                                                                                     |
| rs555726714 | genic_upstream_transcript_variant,intron_variant                                                   |
| rs555729609 | genic_downstream_transcript_variant,intron_variant                                                 |
| rs555736917 | intron_variant                                                                                     |
| rs555753757 | genic_upstream_transcript_variant,intron_variant                                                   |
| rs555765274 | intron_variant                                                                                     |
| rs555824065 | genic_upstream_transcript_variant,intron_variant                                                   |
| rs555835273 | genic_upstream_transcript_variant,intron_variant                                                   |
| rs555843444 | intron_variant                                                                                     |
| rs555844918 | genic_downstream_transcript_variant,intron_variant                                                 |
| rs555859249 | genic_upstream_transcript_variant,intron_variant                                                   |

|             |                                                                                                   |
|-------------|---------------------------------------------------------------------------------------------------|
| rs555864895 | intron_variant                                                                                    |
| rs555887066 | genic_upstream_transcript_variant,intron_variant                                                  |
| rs555892420 | intron_variant                                                                                    |
| rs555898916 | genic_upstream_transcript_variant,intron_variant                                                  |
| rs555913265 | intron_variant                                                                                    |
| rs555945492 | genic_upstream_transcript_variant,intron_variant                                                  |
| rs555950092 | intron_variant                                                                                    |
| rs556011659 | genic_upstream_transcript_variant,intron_variant                                                  |
| rs556013284 | genic_upstream_transcript_variant,intron_variant                                                  |
| rs556038889 | genic_upstream_transcript_variant,upstream_transcript_variant,intron_variant                      |
| rs556060143 | genic_downstream_transcript_variant,intron_variant                                                |
| rs556065804 | downstream_transcript_variant,500B_downstream_variant                                             |
| rs556070899 | genic_upstream_transcript_variant,intron_variant                                                  |
| rs556075940 | genic_upstream_transcript_variant,upstream_transcript_variant,intron_variant                      |
| rs556123759 | genic_upstream_transcript_variant,intron_variant                                                  |
| rs556125651 | genic_upstream_transcript_variant,intron_variant                                                  |
| rs556187071 | genic_upstream_transcript_variant,intron_variant                                                  |
| rs556216308 | intron_variant                                                                                    |
| rs556249753 | intron_variant                                                                                    |
| rs556268027 | intron_variant                                                                                    |
| rs556307717 | intron_variant                                                                                    |
| rs556318484 | genic_upstream_transcript_variant,intron_variant                                                  |
| rs556325842 | genic_upstream_transcript_variant,intron_variant                                                  |
| rs556402208 | genic_upstream_transcript_variant,intron_variant                                                  |
| rs556438585 | intron_variant                                                                                    |
| rs556464511 | genic_upstream_transcript_variant,intron_variant                                                  |
| rs556475794 | genic_upstream_transcript_variant,intron_variant                                                  |
| rs556477309 | intron_variant                                                                                    |
| rs556477349 | intron_variant                                                                                    |
| rs556525894 | genic_upstream_transcript_variant,intron_variant                                                  |
| rs556537526 | intron_variant                                                                                    |
| rs556541308 | 2KB_upstream_variant,genic_upstream_transcript_variant,upstream_transcript_variant,intron_variant |
| rs556568244 | genic_upstream_transcript_variant,intron_variant                                                  |
| rs556571788 | intron_variant                                                                                    |
| rs556572301 | intron_variant                                                                                    |
| rs556606506 | intron_variant                                                                                    |
| rs556630746 | intron_variant                                                                                    |
| rs556646620 | intron_variant                                                                                    |
| rs556695962 | intron_variant                                                                                    |
| rs556702600 | intron_variant                                                                                    |
| rs556715633 | genic_upstream_transcript_variant,intron_variant                                                  |
| rs556731087 | genic_upstream_transcript_variant,intron_variant                                                  |
| rs556734218 | intron_variant                                                                                    |
| rs556737816 | intron_variant                                                                                    |
| rs556742174 | genic_downstream_transcript_variant,3_prime_UTR_variant,non_coding_transcript_variant             |
| rs556783464 | genic_downstream_transcript_variant,intron_variant                                                |
| rs556824187 | genic_downstream_transcript_variant,intron_variant                                                |
| rs556877595 | genic_upstream_transcript_variant,intron_variant                                                  |
| rs556878090 | intron_variant                                                                                    |
| rs556902471 | intron_variant                                                                                    |
| rs556914824 | intron_variant                                                                                    |
| rs557009907 | intron_variant                                                                                    |
| rs557013295 | intron_variant                                                                                    |
| rs557025386 | intron_variant                                                                                    |
| rs557030739 | genic_upstream_transcript_variant,intron_variant                                                  |
| rs557046660 | intron_variant                                                                                    |
| rs557047501 | intron_variant                                                                                    |
| rs557048475 | intron_variant                                                                                    |
| rs557064660 | genic_downstream_transcript_variant,intron_variant                                                |
| rs557085805 | genic_downstream_transcript_variant,intron_variant                                                |
| rs557146277 | intron_variant                                                                                    |
| rs557160157 | genic_upstream_transcript_variant,intron_variant                                                  |
| rs557182947 | intron_variant                                                                                    |
| rs557190488 | genic_upstream_transcript_variant,intron_variant                                                  |
| rs557191629 | genic_downstream_transcript_variant,intron_variant                                                |
| rs557199935 | genic_upstream_transcript_variant,intron_variant                                                  |
| rs557228730 | genic_downstream_transcript_variant,intron_variant                                                |
| rs557259711 | intron_variant                                                                                    |
| rs557263221 | genic_upstream_transcript_variant,intron_variant                                                  |
| rs557269117 | intron_variant                                                                                    |
| rs557296950 | genic_upstream_transcript_variant,intron_variant                                                  |
| rs557300996 | downstream_transcript_variant,genic_downstream_transcript_variant,intron_variant                  |
| rs557307992 | genic_downstream_transcript_variant,intron_variant                                                |
| rs557364175 | intron_variant                                                                                    |

|             |                                                                                                   |
|-------------|---------------------------------------------------------------------------------------------------|
| rs557380914 | genic_upstream_transcript_variant,intron_variant                                                  |
| rs557401337 | genic_downstream_transcript_variant,intron_variant                                                |
| rs557401338 | genic_downstream_transcript_variant,intron_variant                                                |
| rs557407118 | genic_downstream_transcript_variant,intron_variant                                                |
| rs557408448 | intron_variant                                                                                    |
| rs557437505 | genic_upstream_transcript_variant,intron_variant                                                  |
| rs557501904 | genic_downstream_transcript_variant,intron_variant                                                |
| rs557507071 | intron_variant                                                                                    |
| rs557507912 | genic_upstream_transcript_variant,intron_variant                                                  |
| rs557569918 | intron_variant                                                                                    |
| rs557573157 | genic_upstream_transcript_variant,intron_variant                                                  |
| rs557578292 | genic_downstream_transcript_variant,intron_variant                                                |
| rs557636134 | genic_upstream_transcript_variant,intron_variant                                                  |
| rs557646318 | genic_upstream_transcript_variant,intron_variant                                                  |
| rs557671794 | intron_variant                                                                                    |
| rs557699703 | 2KB_upstream_variant,genic_upstream_transcript_variant,upstream_transcript_variant,intron_variant |
| rs557718095 | 2KB_upstream_variant,genic_upstream_transcript_variant,upstream_transcript_variant,intron_variant |
| rs557719709 | genic_downstream_transcript_variant,intron_variant                                                |
| rs557765583 | downstream_transcript_variant,500B_downstream_variant                                             |
| rs557820994 | intron_variant                                                                                    |
| rs557837727 | genic_upstream_transcript_variant,intron_variant                                                  |
| rs557851750 | genic_downstream_transcript_variant,3_prime_UTR_variant,non_coding_transcript_variant             |
| rs557861718 | intron_variant                                                                                    |
| rs557886701 | genic_downstream_transcript_variant,intron_variant                                                |
| rs557899935 | 2KB_upstream_variant,genic_upstream_transcript_variant,upstream_transcript_variant,intron_variant |
| rs557905262 | genic_upstream_transcript_variant,intron_variant                                                  |
| rs557923392 | intron_variant                                                                                    |
| rs557948939 | genic_upstream_transcript_variant,intron_variant                                                  |
| rs557972178 | genic_upstream_transcript_variant,intron_variant                                                  |
| rs557984934 | genic_upstream_transcript_variant,intron_variant                                                  |
| rs557985061 | genic_upstream_transcript_variant,intron_variant                                                  |
| rs558008526 | genic_upstream_transcript_variant,intron_variant                                                  |
| rs558020397 | genic_upstream_transcript_variant,intron_variant                                                  |
| rs558059449 | intron_variant                                                                                    |
| rs558062180 | genic_upstream_transcript_variant,intron_variant                                                  |
| rs558069187 | genic_downstream_transcript_variant,intron_variant                                                |
| rs558107770 | genic_upstream_transcript_variant,intron_variant                                                  |
| rs558125492 | intron_variant                                                                                    |
| rs558132414 | genic_downstream_transcript_variant,intron_variant                                                |
| rs558134898 | intron_variant                                                                                    |
| rs558171313 | 2KB_upstream_variant,genic_upstream_transcript_variant,upstream_transcript_variant,intron_variant |
| rs558171992 | genic_upstream_transcript_variant,intron_variant                                                  |
| rs558179437 | genic_downstream_transcript_variant,intron_variant                                                |
| rs558225070 | intron_variant                                                                                    |
| rs558282289 | genic_upstream_transcript_variant,intron_variant                                                  |
| rs558282945 | genic_upstream_transcript_variant,intron_variant                                                  |
| rs558297687 | genic_upstream_transcript_variant,intron_variant                                                  |
| rs558308666 | genic_downstream_transcript_variant,intron_variant                                                |
| rs558318149 | genic_upstream_transcript_variant,intron_variant                                                  |
| rs558318982 | genic_downstream_transcript_variant,intron_variant                                                |
| rs558382003 | genic_upstream_transcript_variant,intron_variant                                                  |
| rs558413610 | intron_variant                                                                                    |
| rs558427109 | intron_variant                                                                                    |
| rs558435638 | genic_downstream_transcript_variant,intron_variant                                                |
| rs558441244 | genic_upstream_transcript_variant,intron_variant                                                  |
| rs558442118 | intron_variant                                                                                    |
| rs558532849 | 2KB_upstream_variant,genic_upstream_transcript_variant,upstream_transcript_variant,intron_variant |
| rs558543477 | genic_downstream_transcript_variant,intron_variant                                                |
| rs558561366 | genic_upstream_transcript_variant,intron_variant                                                  |
| rs558576370 | genic_upstream_transcript_variant,intron_variant                                                  |
| rs558670539 | intron_variant                                                                                    |
| rs558671734 | genic_upstream_transcript_variant,intron_variant                                                  |
| rs558677066 | intron_variant                                                                                    |
| rs558689684 | genic_upstream_transcript_variant,intron_variant                                                  |
| rs558691310 | intron_variant                                                                                    |
| rs558691321 | intron_variant                                                                                    |
| rs558706578 | 2KB_upstream_variant,genic_upstream_transcript_variant,upstream_transcript_variant,intron_variant |
| rs558716467 | genic_upstream_transcript_variant,upstream_transcript_variant,intron_variant                      |
| rs558788015 | genic_downstream_transcript_variant,intron_variant                                                |
| rs558811815 | intron_variant                                                                                    |
| rs558839515 | intron_variant                                                                                    |
| rs558870053 | intron_variant                                                                                    |
| rs558889725 | intron_variant                                                                                    |
| rs558907657 | intron_variant                                                                                    |

|             |                                                                                                   |
|-------------|---------------------------------------------------------------------------------------------------|
| rs558928551 | intron_variant                                                                                    |
| rs558933063 | genic_downstream_transcript_variant,intron_variant                                                |
| rs558979535 | intron_variant                                                                                    |
| rs558989509 | genic_upstream_transcript_variant,intron_variant                                                  |
| rs559010763 | intron_variant                                                                                    |
| rs559014414 | genic_upstream_transcript_variant,intron_variant                                                  |
| rs559015974 | intron_variant                                                                                    |
| rs559046502 | intron_variant                                                                                    |
| rs559104396 | genic_downstream_transcript_variant,intron_variant                                                |
| rs559109952 | intron_variant                                                                                    |
| rs559171383 | 2KB_upstream_variant,genic_upstream_transcript_variant,upstream_transcript_variant,intron_variant |
| rs559173921 | genic_upstream_transcript_variant,intron_variant                                                  |
| rs559208441 | genic_downstream_transcript_variant,intron_variant                                                |
| rs559223755 | intron_variant                                                                                    |
| rs559248462 | genic_upstream_transcript_variant,intron_variant                                                  |
| rs559269443 | intron_variant                                                                                    |
| rs559301972 | intron_variant                                                                                    |
| rs559340035 | genic_downstream_transcript_variant,intron_variant                                                |
| rs559345366 | intron_variant                                                                                    |
| rs559354080 | intron_variant                                                                                    |
| rs559388566 | intron_variant                                                                                    |
| rs559392792 | genic_upstream_transcript_variant,intron_variant                                                  |
| rs559442566 | intron_variant                                                                                    |
| rs559443524 | genic_upstream_transcript_variant,intron_variant                                                  |
| rs559495646 | genic_downstream_transcript_variant,intron_variant                                                |
| rs559504357 | genic_upstream_transcript_variant,intron_variant                                                  |
| rs559520663 | intron_variant                                                                                    |
| rs559532713 | genic_downstream_transcript_variant,intron_variant                                                |
| rs559537957 | genic_upstream_transcript_variant,intron_variant                                                  |
| rs559547248 | genic_upstream_transcript_variant,intron_variant                                                  |
| rs559591638 | intron_variant                                                                                    |
| rs559629856 | genic_upstream_transcript_variant,intron_variant                                                  |
| rs559653995 | genic_upstream_transcript_variant,intron_variant                                                  |
| rs559660484 | intron_variant                                                                                    |
| rs559712001 | genic_downstream_transcript_variant,intron_variant                                                |
| rs559713751 | intron_variant                                                                                    |
| rs559736533 | genic_upstream_transcript_variant,intron_variant                                                  |
| rs559747627 | genic_downstream_transcript_variant,intron_variant                                                |
| rs559748015 | genic_downstream_transcript_variant,intron_variant                                                |
| rs559778228 | 2KB_upstream_variant,genic_upstream_transcript_variant,upstream_transcript_variant,intron_variant |
| rs559797330 | genic_upstream_transcript_variant,upstream_transcript_variant,intron_variant                      |
| rs559799281 | genic_upstream_transcript_variant,intron_variant                                                  |
| rs559809381 | genic_upstream_transcript_variant,intron_variant                                                  |
| rs559822726 | genic_downstream_transcript_variant,intron_variant                                                |
| rs559834327 | intron_variant                                                                                    |
| rs559836184 | genic_upstream_transcript_variant,intron_variant                                                  |
| rs559884260 | genic_upstream_transcript_variant,intron_variant                                                  |
| rs560016183 | genic_upstream_transcript_variant,intron_variant                                                  |
| rs560026608 | intron_variant                                                                                    |
| rs560033098 | genic_upstream_transcript_variant,intron_variant                                                  |
| rs560035458 | intron_variant                                                                                    |
| rs560044400 | intron_variant                                                                                    |
| rs560089517 | intron_variant                                                                                    |
| rs560093559 | genic_upstream_transcript_variant,intron_variant                                                  |
| rs560159298 | intron_variant                                                                                    |
| rs560162629 | genic_upstream_transcript_variant,intron_variant                                                  |
| rs560179368 | genic_upstream_transcript_variant,intron_variant                                                  |
| rs560239873 | intron_variant                                                                                    |
| rs560259454 | genic_upstream_transcript_variant,intron_variant                                                  |
| rs560266467 | genic_upstream_transcript_variant,intron_variant                                                  |
| rs560279523 | intron_variant                                                                                    |
| rs560285479 | genic_upstream_transcript_variant,intron_variant                                                  |
| rs560298133 | genic_downstream_transcript_variant,3_prime_UTR_variant,non_coding_transcript_variant             |
| rs560309592 | intron_variant                                                                                    |
| rs560324112 | genic_upstream_transcript_variant,intron_variant                                                  |
| rs560364895 | intron_variant                                                                                    |
| rs560496764 | intron_variant                                                                                    |
| rs560500537 | intron_variant                                                                                    |
| rs560500958 | intron_variant                                                                                    |
| rs560531035 | genic_upstream_transcript_variant,intron_variant                                                  |
| rs560565791 | intron_variant                                                                                    |
| rs560623890 | genic_upstream_transcript_variant,intron_variant                                                  |
| rs560637490 | genic_upstream_transcript_variant,intron_variant                                                  |
| rs560650260 | genic_downstream_transcript_variant,intron_variant                                                |

|             |                                                                                                   |
|-------------|---------------------------------------------------------------------------------------------------|
| rs560658903 | genic_upstream_transcript_variant,intron_variant                                                  |
| rs560674910 | genic_downstream_transcript_variant,intron_variant                                                |
| rs560694099 | genic_upstream_transcript_variant,intron_variant                                                  |
| rs560719624 | genic_upstream_transcript_variant,intron_variant                                                  |
| rs560720032 | intron_variant                                                                                    |
| rs560735696 | genic_downstream_transcript_variant,intron_variant                                                |
| rs560756723 | 5_prime_UTR_variant,intron_variant                                                                |
| rs560798338 | genic_upstream_transcript_variant,intron_variant                                                  |
| rs560808755 | genic_upstream_transcript_variant,intron_variant                                                  |
| rs560845270 | genic_upstream_transcript_variant,upstream_transcript_variant,intron_variant                      |
| rs560845502 | intron_variant                                                                                    |
| rs560860037 | intron_variant                                                                                    |
| rs560864151 | intron_variant                                                                                    |
| rs560877696 | intron_variant                                                                                    |
| rs560878054 | genic_downstream_transcript_variant,3_prime_UTR_variant,non_coding_transcript_variant             |
| rs560882183 | intron_variant                                                                                    |
| rs560970209 | genic_upstream_transcript_variant,intron_variant                                                  |
| rs560981803 | genic_downstream_transcript_variant,intron_variant                                                |
| rs560996074 | intron_variant                                                                                    |
| rs561050635 | genic_upstream_transcript_variant,intron_variant                                                  |
| rs561060423 | intron_variant                                                                                    |
| rs561091466 | genic_upstream_transcript_variant,intron_variant                                                  |
| rs561098894 | genic_downstream_transcript_variant,intron_variant                                                |
| rs561148859 | genic_upstream_transcript_variant,intron_variant                                                  |
| rs561178266 | genic_downstream_transcript_variant,intron_variant                                                |
| rs561185197 | genic_downstream_transcript_variant,intron_variant                                                |
| rs561186414 | genic_upstream_transcript_variant,intron_variant                                                  |
| rs561187150 | genic_downstream_transcript_variant,intron_variant                                                |
| rs561202682 | intron_variant                                                                                    |
| rs561252733 | genic_upstream_transcript_variant,intron_variant                                                  |
| rs561311108 | genic_upstream_transcript_variant,intron_variant                                                  |
| rs561318256 | genic_downstream_transcript_variant,intron_variant                                                |
| rs561347675 | missense_variant,coding_sequence_variant,non_coding_transcript_variant                            |
| rs561355927 | genic_downstream_transcript_variant,intron_variant                                                |
| rs561420700 | intron_variant                                                                                    |
| rs561442879 | intron_variant                                                                                    |
| rs561500435 | genic_downstream_transcript_variant,intron_variant                                                |
| rs561529682 | intron_variant                                                                                    |
| rs561553348 | intron_variant                                                                                    |
| rs561567490 | intron_variant                                                                                    |
| rs561569871 | genic_upstream_transcript_variant,intron_variant                                                  |
| rs561591351 | genic_downstream_transcript_variant,intron_variant                                                |
| rs561631218 | genic_upstream_transcript_variant,intron_variant                                                  |
| rs561639095 | intron_variant                                                                                    |
| rs561650983 | genic_downstream_transcript_variant,intron_variant                                                |
| rs561661506 | genic_upstream_transcript_variant,intron_variant                                                  |
| rs561696189 | intron_variant                                                                                    |
| rs561710830 | intron_variant                                                                                    |
| rs561717936 | genic_upstream_transcript_variant,intron_variant                                                  |
| rs561745397 | genic_upstream_transcript_variant,intron_variant                                                  |
| rs561770433 | intron_variant                                                                                    |
| rs561779275 | 2KB_upstream_variant,genic_upstream_transcript_variant,upstream_transcript_variant,intron_variant |
| rs561791444 | intron_variant                                                                                    |
| rs561802121 | genic_upstream_transcript_variant,intron_variant                                                  |
| rs561809091 | genic_upstream_transcript_variant,intron_variant                                                  |
| rs561830898 | genic_downstream_transcript_variant,intron_variant                                                |
| rs561877850 | genic_downstream_transcript_variant,intron_variant                                                |
| rs561888590 | genic_upstream_transcript_variant,intron_variant                                                  |
| rs561903185 | genic_upstream_transcript_variant,intron_variant                                                  |
| rs561908240 | genic_upstream_transcript_variant,intron_variant                                                  |
| rs561913833 | genic_upstream_transcript_variant,intron_variant                                                  |
| rs561932408 | intron_variant                                                                                    |
| rs561940865 | intron_variant                                                                                    |
| rs561972143 | genic_upstream_transcript_variant,intron_variant                                                  |
| rs562002883 | intron_variant                                                                                    |
| rs562072771 | genic_upstream_transcript_variant,intron_variant                                                  |
| rs562111069 | genic_downstream_transcript_variant,intron_variant                                                |
| rs562140062 | genic_upstream_transcript_variant,intron_variant                                                  |
| rs562142208 | genic_upstream_transcript_variant,intron_variant                                                  |
| rs562168351 | genic_upstream_transcript_variant,intron_variant                                                  |
| rs562170390 | genic_downstream_transcript_variant,intron_variant                                                |
| rs562175784 | genic_upstream_transcript_variant,intron_variant                                                  |
| rs562189308 | intron_variant                                                                                    |
| rs562201153 | genic_upstream_transcript_variant,intron_variant                                                  |

|             |                                                                                                   |
|-------------|---------------------------------------------------------------------------------------------------|
| rs562228235 | intron_variant                                                                                    |
| rs562234679 | genic_upstream_transcript_variant,intron_variant                                                  |
| rs562244458 | intron_variant                                                                                    |
| rs562259176 | genic_downstream_transcript_variant,intron_variant                                                |
| rs562270912 | genic_upstream_transcript_variant,intron_variant                                                  |
| rs562311983 | genic_upstream_transcript_variant,intron_variant                                                  |
| rs562334254 | genic_downstream_transcript_variant,intron_variant                                                |
| rs562337904 | genic_upstream_transcript_variant,intron_variant                                                  |
| rs562339461 | intron_variant                                                                                    |
| rs562396709 | genic_downstream_transcript_variant,3_prime_UTR_variant,non_coding_transcript_variant             |
| rs562463429 | genic_upstream_transcript_variant,intron_variant                                                  |
| rs562472188 | intron_variant                                                                                    |
| rs562474467 | 2KB_upstream_variant,genic_upstream_transcript_variant,upstream_transcript_variant,intron_variant |
| rs562509350 | intron_variant                                                                                    |
| rs562531041 | genic_downstream_transcript_variant,intron_variant                                                |
| rs562541499 | intron_variant                                                                                    |
| rs562564020 | genic_downstream_transcript_variant,intron_variant                                                |
| rs562564732 | missense_variant,coding_sequence_variant,non_coding_transcript_variant                            |
| rs562619748 | genic_upstream_transcript_variant,intron_variant                                                  |
| rs562652155 | genic_downstream_transcript_variant,intron_variant                                                |
| rs562657118 | intron_variant                                                                                    |
| rs562659115 | intron_variant                                                                                    |
| rs562676757 | intron_variant                                                                                    |
| rs562714752 | intron_variant                                                                                    |
| rs562721764 | genic_upstream_transcript_variant,intron_variant,non_coding_transcript_variant                    |
| rs562748370 | intron_variant                                                                                    |
| rs562825473 | genic_downstream_transcript_variant,intron_variant                                                |
| rs562979133 | genic_upstream_transcript_variant,intron_variant                                                  |
| rs563007490 | genic_upstream_transcript_variant,intron_variant                                                  |
| rs563045022 | intron_variant                                                                                    |
| rs563045958 | intron_variant                                                                                    |
| rs563055217 | genic_upstream_transcript_variant,intron_variant                                                  |
| rs563064456 | genic_downstream_transcript_variant,intron_variant                                                |
| rs563064505 | genic_upstream_transcript_variant,intron_variant                                                  |
| rs563094850 | genic_upstream_transcript_variant,intron_variant                                                  |
| rs563146125 | intron_variant                                                                                    |
| rs563185057 | genic_upstream_transcript_variant,intron_variant                                                  |
| rs563189410 | genic_downstream_transcript_variant,intron_variant                                                |
| rs563191426 | genic_downstream_transcript_variant,intron_variant                                                |
| rs563220772 | 2KB_upstream_variant,genic_upstream_transcript_variant,upstream_transcript_variant,intron_variant |
| rs563225683 | genic_downstream_transcript_variant,intron_variant                                                |
| rs563233434 | intron_variant                                                                                    |
| rs563250599 | genic_upstream_transcript_variant,intron_variant                                                  |
| rs563278893 | intron_variant                                                                                    |
| rs563279428 | genic_upstream_transcript_variant,intron_variant                                                  |
| rs563312716 | intron_variant                                                                                    |
| rs563319707 | intron_variant                                                                                    |
| rs563337977 | genic_downstream_transcript_variant,intron_variant                                                |
| rs563343106 | genic_upstream_transcript_variant,intron_variant                                                  |
| rs563360447 | genic_upstream_transcript_variant,intron_variant                                                  |
| rs563409320 | intron_variant                                                                                    |
| rs563413956 | intron_variant                                                                                    |
| rs563434056 | genic_upstream_transcript_variant,intron_variant                                                  |
| rs563453170 | intron_variant                                                                                    |
| rs563463841 | genic_upstream_transcript_variant,upstream_transcript_variant,intron_variant                      |
| rs563531071 | intron_variant                                                                                    |
| rs563534182 | genic_upstream_transcript_variant,intron_variant                                                  |
| rs563567855 | genic_upstream_transcript_variant,intron_variant                                                  |
| rs563592976 | intron_variant                                                                                    |
| rs563595596 | genic_upstream_transcript_variant,intron_variant                                                  |
| rs563599359 | genic_upstream_transcript_variant,intron_variant                                                  |
| rs563608993 | 5_prime_UTR_variant,intron_variant                                                                |
| rs563631358 | genic_downstream_transcript_variant,intron_variant                                                |
| rs563706962 | genic_upstream_transcript_variant,intron_variant                                                  |
| rs563716794 | genic_upstream_transcript_variant,intron_variant                                                  |
| rs563747292 | intron_variant                                                                                    |
| rs563800150 | genic_upstream_transcript_variant,intron_variant                                                  |
| rs563803328 | genic_downstream_transcript_variant,intron_variant                                                |
| rs563840110 | genic_downstream_transcript_variant,intron_variant                                                |
| rs563888661 | intron_variant                                                                                    |
| rs563907136 | intron_variant                                                                                    |
| rs563954693 | intron_variant                                                                                    |
| rs563960993 | intron_variant                                                                                    |
| rs564001592 | genic_upstream_transcript_variant,intron_variant                                                  |

|             |                                                                                                   |
|-------------|---------------------------------------------------------------------------------------------------|
| rs564045805 | genic_upstream_transcript_variant,intron_variant                                                  |
| rs564115135 | genic_upstream_transcript_variant,intron_variant                                                  |
| rs564146639 | genic_upstream_transcript_variant,intron_variant                                                  |
| rs564179426 | genic_downstream_transcript_variant,intron_variant                                                |
| rs564180465 | genic_upstream_transcript_variant,intron_variant                                                  |
| rs564263321 | intron_variant                                                                                    |
| rs564267389 | genic_upstream_transcript_variant,intron_variant                                                  |
| rs564290425 | intron_variant                                                                                    |
| rs564290838 | intron_variant                                                                                    |
| rs564299007 | genic_upstream_transcript_variant,intron_variant                                                  |
| rs564311728 | genic_upstream_transcript_variant,intron_variant                                                  |
| rs564325037 | intron_variant                                                                                    |
| rs564359745 | genic_downstream_transcript_variant,intron_variant                                                |
| rs564415838 | genic_upstream_transcript_variant,intron_variant                                                  |
| rs564456203 | genic_upstream_transcript_variant,intron_variant                                                  |
| rs564471390 | intron_variant                                                                                    |
| rs564472559 | intron_variant                                                                                    |
| rs564561731 | intron_variant                                                                                    |
| rs564569484 | genic_upstream_transcript_variant,intron_variant                                                  |
| rs564575523 | genic_downstream_transcript_variant,intron_variant                                                |
| rs564586978 | intron_variant                                                                                    |
| rs564596798 | intron_variant                                                                                    |
| rs564638188 | genic_downstream_transcript_variant,intron_variant                                                |
| rs564648642 | intron_variant                                                                                    |
| rs564648735 | intron_variant                                                                                    |
| rs564662260 | genic_downstream_transcript_variant,intron_variant                                                |
| rs564713000 | genic_upstream_transcript_variant,intron_variant                                                  |
| rs564749735 | genic_upstream_transcript_variant,intron_variant                                                  |
| rs564765380 | intron_variant                                                                                    |
| rs564779395 | genic_upstream_transcript_variant,intron_variant                                                  |
| rs564849565 | genic_upstream_transcript_variant,intron_variant                                                  |
| rs564860523 | intron_variant                                                                                    |
| rs564864821 | genic_downstream_transcript_variant,intron_variant                                                |
| rs564876950 | genic_upstream_transcript_variant,intron_variant                                                  |
| rs564891216 | intron_variant                                                                                    |
| rs564894613 | genic_upstream_transcript_variant,intron_variant                                                  |
| rs564909330 | genic_downstream_transcript_variant,intron_variant                                                |
| rs564984562 | upstream_transcript_variant,2KB_upstream_variant,genic_upstream_transcript_variant,intron_variant |
| rs565000347 | intron_variant                                                                                    |
| rs565026414 | genic_upstream_transcript_variant,intron_variant                                                  |
| rs565033466 | intron_variant                                                                                    |
| rs565051937 | genic_downstream_transcript_variant,intron_variant                                                |
| rs565052258 | intron_variant                                                                                    |
| rs565098516 | genic_upstream_transcript_variant,intron_variant                                                  |
| rs565143020 | genic_downstream_transcript_variant,intron_variant                                                |
| rs565153629 | intron_variant                                                                                    |
| rs565155913 | intron_variant                                                                                    |
| rs565182900 | genic_upstream_transcript_variant,intron_variant                                                  |
| rs565196848 | genic_upstream_transcript_variant,intron_variant                                                  |
| rs565225885 | intron_variant                                                                                    |
| rs565227835 | intron_variant                                                                                    |
| rs565263933 | intron_variant                                                                                    |
| rs565284912 | genic_upstream_transcript_variant,intron_variant                                                  |
| rs565340536 | genic_downstream_transcript_variant,intron_variant                                                |
| rs565349390 | genic_downstream_transcript_variant,intron_variant                                                |
| rs565368885 | genic_upstream_transcript_variant,intron_variant                                                  |
| rs565421203 | intron_variant                                                                                    |
| rs565479601 | intron_variant                                                                                    |
| rs565517972 | genic_upstream_transcript_variant,intron_variant                                                  |
| rs565518326 | genic_upstream_transcript_variant,intron_variant                                                  |
| rs565520032 | genic_upstream_transcript_variant,intron_variant                                                  |
| rs565529338 | genic_downstream_transcript_variant,intron_variant                                                |
| rs565554780 | intron_variant                                                                                    |
| rs565566853 | genic_upstream_transcript_variant,intron_variant                                                  |
| rs565581078 | genic_upstream_transcript_variant,intron_variant                                                  |
| rs565602135 | intron_variant                                                                                    |
| rs565604638 | intron_variant                                                                                    |
| rs565630171 | genic_downstream_transcript_variant,intron_variant                                                |
| rs565683451 | intron_variant                                                                                    |
| rs565701148 | intron_variant                                                                                    |
| rs565705941 | upstream_transcript_variant,2KB_upstream_variant,genic_upstream_transcript_variant,intron_variant |
| rs565728956 | genic_downstream_transcript_variant,3_prime_UTR_variant,non_coding_transcript_variant             |
| rs565769652 | genic_downstream_transcript_variant,intron_variant                                                |
| rs565840108 | intron_variant                                                                                    |

|             |                                                                                                              |
|-------------|--------------------------------------------------------------------------------------------------------------|
| rs565842370 | genic_upstream_transcript_variant,intron_variant                                                             |
| rs565901515 | genic_upstream_transcript_variant,intron_variant                                                             |
| rs565909763 | genic_upstream_transcript_variant,intron_variant                                                             |
| rs565927958 | genic_downstream_transcript_variant,intron_variant                                                           |
| rs565945762 | genic_downstream_transcript_variant,intron_variant                                                           |
| rs565953301 | intron_variant                                                                                               |
| rs565979428 | genic_upstream_transcript_variant,intron_variant                                                             |
| rs565992619 | intron_variant                                                                                               |
| rs566027684 | genic_upstream_transcript_variant,intron_variant                                                             |
| rs566061763 | intron_variant                                                                                               |
| rs566080892 | genic_upstream_transcript_variant,intron_variant                                                             |
| rs566100307 | genic_downstream_transcript_variant,intron_variant                                                           |
| rs566133571 | intron_variant                                                                                               |
| rs566187439 | genic_upstream_transcript_variant,intron_variant                                                             |
| rs566214192 | genic_upstream_transcript_variant,intron_variant                                                             |
| rs566231589 | genic_upstream_transcript_variant,intron_variant                                                             |
| rs566286225 | intron_variant                                                                                               |
| rs566296175 | genic_upstream_transcript_variant,intron_variant                                                             |
| rs566325516 | genic_upstream_transcript_variant,intron_variant                                                             |
| rs566328036 | intron_variant                                                                                               |
| rs566359835 | genic_upstream_transcript_variant,intron_variant                                                             |
| rs566359904 | genic_upstream_transcript_variant,intron_variant                                                             |
| rs566359915 | genic_upstream_transcript_variant,intron_variant                                                             |
| rs566371663 | genic_downstream_transcript_variant,intron_variant                                                           |
| rs566394943 | upstream_transcript_variant,2KB_upstream_variant,genic_upstream_transcript_variant,intron_variant            |
| rs566413192 | intron_variant                                                                                               |
| rs566413912 | intron_variant                                                                                               |
| rs566416598 | genic_upstream_transcript_variant,intron_variant                                                             |
| rs566450176 | genic_downstream_transcript_variant,intron_variant                                                           |
| rs566454800 | intron_variant                                                                                               |
| rs566534022 | intron_variant                                                                                               |
| rs566550417 | genic_upstream_transcript_variant,intron_variant                                                             |
| rs566551459 | intron_variant                                                                                               |
| rs566566006 | intron_variant                                                                                               |
| rs566617956 | non_coding_transcript_variant,genic_downstream_transcript_variant,coding_sequence_variant,synonymous_variant |
| rs566704837 | intron_variant                                                                                               |
| rs566711407 | intron_variant                                                                                               |
| rs566713361 | genic_downstream_transcript_variant,intron_variant                                                           |
| rs566737506 | genic_upstream_transcript_variant,intron_variant                                                             |
| rs566744493 | intron_variant                                                                                               |
| rs566762877 | genic_downstream_transcript_variant,intron_variant                                                           |
| rs566790058 | genic_upstream_transcript_variant,intron_variant                                                             |
| rs566792422 | 5_prime_UTR_variant,non_coding_transcript_variant,genic_upstream_transcript_variant,intron_variant           |
| rs566813792 | intron_variant                                                                                               |
| rs566843188 | genic_downstream_transcript_variant,intron_variant                                                           |
| rs566896765 | genic_upstream_transcript_variant,intron_variant                                                             |
| rs566916755 | intron_variant                                                                                               |
| rs566943801 | intron_variant                                                                                               |
| rs566945822 | genic_upstream_transcript_variant,intron_variant                                                             |
| rs566977547 | genic_downstream_transcript_variant,intron_variant                                                           |
| rs566982278 | intron_variant                                                                                               |
| rs566993048 | genic_downstream_transcript_variant,intron_variant                                                           |
| rs567033632 | intron_variant                                                                                               |
| rs567055239 | intron_variant                                                                                               |
| rs567063919 | intron_variant                                                                                               |
| rs567088819 | genic_upstream_transcript_variant,intron_variant                                                             |
| rs567116463 | genic_downstream_transcript_variant,intron_variant                                                           |
| rs567120617 | intron_variant                                                                                               |
| rs567122904 | intron_variant                                                                                               |
| rs567128834 | genic_downstream_transcript_variant,intron_variant                                                           |
| rs567136590 | genic_upstream_transcript_variant,intron_variant                                                             |
| rs567175972 | genic_downstream_transcript_variant,intron_variant                                                           |
| rs567207379 | intron_variant                                                                                               |
| rs567228644 | genic_downstream_transcript_variant,intron_variant                                                           |
| rs567229868 | genic_downstream_transcript_variant,intron_variant                                                           |
| rs567246729 | genic_downstream_transcript_variant,intron_variant                                                           |
| rs567256878 | genic_upstream_transcript_variant,intron_variant                                                             |
| rs567281353 | genic_downstream_transcript_variant,intron_variant                                                           |
| rs567294559 | genic_upstream_transcript_variant,intron_variant                                                             |
| rs567312869 | genic_downstream_transcript_variant,intron_variant                                                           |
| rs567358450 | genic_upstream_transcript_variant,intron_variant                                                             |
| rs567366255 | genic_upstream_transcript_variant,intron_variant                                                             |
| rs567380575 | intron_variant                                                                                               |
| rs567390429 | genic_downstream_transcript_variant,intron_variant                                                           |

|             |                                                                                                   |
|-------------|---------------------------------------------------------------------------------------------------|
| rs567393232 | upstream_transcript_variant,2KB_upstream_variant,genic_upstream_transcript_variant,intron_variant |
| rs567394566 | intron_variant                                                                                    |
| rs567442689 | intron_variant                                                                                    |
| rs567471769 | genic_upstream_transcript_variant,intron_variant                                                  |
| rs567511555 | genic_downstream_transcript_variant,intron_variant                                                |
| rs567530345 | genic_upstream_transcript_variant,intron_variant                                                  |
| rs567559667 | genic_upstream_transcript_variant,intron_variant                                                  |
| rs567581042 | genic_downstream_transcript_variant,intron_variant                                                |
| rs567636506 | intron_variant                                                                                    |
| rs567639477 | genic_downstream_transcript_variant,intron_variant                                                |
| rs567685524 | intron_variant                                                                                    |
| rs567686687 | genic_downstream_transcript_variant,intron_variant                                                |
| rs567698515 | genic_downstream_transcript_variant,intron_variant                                                |
| rs567705129 | intron_variant                                                                                    |
| rs567705718 | genic_upstream_transcript_variant,intron_variant                                                  |
| rs567777778 | intron_variant                                                                                    |
| rs567846166 | intron_variant                                                                                    |
| rs567866465 | genic_upstream_transcript_variant,intron_variant                                                  |
| rs567881883 | intron_variant                                                                                    |
| rs567935138 | upstream_transcript_variant,2KB_upstream_variant,genic_upstream_transcript_variant,intron_variant |
| rs567950150 | genic_upstream_transcript_variant,intron_variant                                                  |
| rs567994951 | genic_downstream_transcript_variant,intron_variant                                                |
| rs567999341 | intron_variant                                                                                    |
| rs568119445 | intron_variant                                                                                    |
| rs568120123 | genic_downstream_transcript_variant,intron_variant                                                |
| rs568152978 | genic_downstream_transcript_variant,intron_variant                                                |
| rs568157672 | genic_upstream_transcript_variant,intron_variant                                                  |
| rs568180587 | genic_upstream_transcript_variant,intron_variant                                                  |
| rs568260358 | intron_variant                                                                                    |
| rs568293455 | genic_upstream_transcript_variant,intron_variant                                                  |
| rs568351783 | upstream_transcript_variant,2KB_upstream_variant,genic_upstream_transcript_variant,intron_variant |
| rs568387876 | intron_variant                                                                                    |
| rs568409295 | intron_variant                                                                                    |
| rs568452408 | intron_variant                                                                                    |
| rs568458534 | intron_variant                                                                                    |
| rs568470646 | intron_variant                                                                                    |
| rs568481618 | intron_variant                                                                                    |
| rs568495386 | genic_upstream_transcript_variant,intron_variant                                                  |
| rs568561864 | genic_downstream_transcript_variant,intron_variant                                                |
| rs568600369 | intron_variant                                                                                    |
| rs568626761 | intron_variant                                                                                    |
| rs568652122 | genic_upstream_transcript_variant,intron_variant                                                  |
| rs568734054 | genic_downstream_transcript_variant,3_prime_UTR_variant,non_coding_transcript_variant             |
| rs568760092 | intron_variant                                                                                    |
| rs568776842 | intron_variant                                                                                    |
| rs568796085 | genic_downstream_transcript_variant,downstream_transcript_variant,intron_variant                  |
| rs568805040 | genic_upstream_transcript_variant,intron_variant                                                  |
| rs568853289 | intron_variant                                                                                    |
| rs568873990 | genic_downstream_transcript_variant,intron_variant                                                |
| rs568930922 | intron_variant                                                                                    |
| rs568944744 | intron_variant                                                                                    |
| rs568964246 | upstream_transcript_variant,genic_upstream_transcript_variant,intron_variant                      |
| rs568966871 | intron_variant                                                                                    |
| rs568969775 | intron_variant                                                                                    |
| rs569003930 | intron_variant                                                                                    |
| rs569047642 | intron_variant                                                                                    |
| rs569074363 | intron_variant                                                                                    |
| rs569104133 | intron_variant                                                                                    |
| rs569147645 | intron_variant                                                                                    |
| rs569222113 | intron_variant                                                                                    |
| rs569225474 | intron_variant                                                                                    |
| rs569243564 | intron_variant                                                                                    |
| rs569260414 | upstream_transcript_variant,2KB_upstream_variant,genic_upstream_transcript_variant,intron_variant |
| rs569283948 | genic_upstream_transcript_variant,intron_variant                                                  |
| rs569286078 | genic_downstream_transcript_variant,intron_variant                                                |
| rs569292290 | intron_variant                                                                                    |
| rs569298077 | intron_variant                                                                                    |
| rs569314925 | genic_downstream_transcript_variant,intron_variant                                                |
| rs569326210 | intron_variant                                                                                    |
| rs569352632 | genic_downstream_transcript_variant,intron_variant                                                |
| rs569365762 | intron_variant                                                                                    |
| rs569370314 | genic_upstream_transcript_variant,intron_variant                                                  |
| rs569429258 | genic_upstream_transcript_variant,intron_variant                                                  |
| rs569440962 | genic_upstream_transcript_variant,intron_variant                                                  |

|             |                                                                                                   |
|-------------|---------------------------------------------------------------------------------------------------|
| rs569467794 | genic_downstream_transcript_variant,intron_variant                                                |
| rs569472551 | genic_downstream_transcript_variant,intron_variant                                                |
| rs569493936 | genic_upstream_transcript_variant,intron_variant                                                  |
| rs569512412 | intron_variant                                                                                    |
| rs569551511 | intron_variant                                                                                    |
| rs569582074 | genic_upstream_transcript_variant,intron_variant                                                  |
| rs569599303 | genic_upstream_transcript_variant,intron_variant                                                  |
| rs569650197 | genic_upstream_transcript_variant,intron_variant                                                  |
| rs569651880 | genic_upstream_transcript_variant,intron_variant                                                  |
| rs569743981 | 500B_downstream_variant,downstream_transcript_variant                                             |
| rs569744962 | upstream_transcript_variant,2KB_upstream_variant,genic_upstream_transcript_variant,intron_variant |
| rs569756075 | genic_upstream_transcript_variant,intron_variant                                                  |
| rs569759238 | intron_variant                                                                                    |
| rs569773563 | intron_variant                                                                                    |
| rs569786918 | genic_downstream_transcript_variant,intron_variant                                                |
| rs569853349 | genic_upstream_transcript_variant,intron_variant                                                  |
| rs569889379 | genic_upstream_transcript_variant,intron_variant                                                  |
| rs569897707 | genic_upstream_transcript_variant,intron_variant                                                  |
| rs569925845 | genic_upstream_transcript_variant,intron_variant                                                  |
| rs569934255 | genic_upstream_transcript_variant,intron_variant                                                  |
| rs569935290 | intron_variant                                                                                    |
| rs569954666 | genic_downstream_transcript_variant,intron_variant                                                |
| rs570017283 | intron_variant                                                                                    |
| rs570036852 | genic_upstream_transcript_variant,intron_variant                                                  |
| rs570043311 | intron_variant                                                                                    |
| rs570141585 | genic_upstream_transcript_variant,intron_variant                                                  |
| rs570191239 | genic_downstream_transcript_variant,intron_variant                                                |
| rs570259313 | genic_upstream_transcript_variant,intron_variant                                                  |
| rs570263538 | genic_downstream_transcript_variant,intron_variant                                                |
| rs570280645 | intron_variant                                                                                    |
| rs570300329 | intron_variant                                                                                    |
| rs570301178 | genic_downstream_transcript_variant,intron_variant                                                |
| rs570321143 | intron_variant                                                                                    |
| rs570324539 | genic_upstream_transcript_variant,intron_variant                                                  |
| rs570326644 | genic_upstream_transcript_variant,intron_variant                                                  |
| rs570328815 | intron_variant                                                                                    |
| rs570341142 | genic_upstream_transcript_variant,intron_variant                                                  |
| rs570351099 | genic_downstream_transcript_variant,intron_variant                                                |
| rs570361275 | upstream_transcript_variant,2KB_upstream_variant,genic_upstream_transcript_variant,intron_variant |
| rs570386997 | genic_upstream_transcript_variant,intron_variant                                                  |
| rs570404894 | upstream_transcript_variant,2KB_upstream_variant,genic_upstream_transcript_variant,intron_variant |
| rs570416991 | intron_variant                                                                                    |
| rs570436523 | genic_upstream_transcript_variant,intron_variant                                                  |
| rs570470680 | genic_upstream_transcript_variant,intron_variant                                                  |
| rs570472090 | genic_upstream_transcript_variant,intron_variant                                                  |
| rs570678032 | intron_variant                                                                                    |
| rs570714333 | intron_variant                                                                                    |
| rs570802138 | intron_variant                                                                                    |
| rs570805373 | genic_upstream_transcript_variant,intron_variant                                                  |
| rs570828437 | genic_upstream_transcript_variant,intron_variant                                                  |
| rs570855669 | intron_variant                                                                                    |
| rs570860788 | genic_downstream_transcript_variant,intron_variant                                                |
| rs570871843 | genic_upstream_transcript_variant,intron_variant                                                  |
| rs570915736 | intron_variant                                                                                    |
| rs570936347 | genic_downstream_transcript_variant,intron_variant                                                |
| rs570981871 | genic_downstream_transcript_variant,intron_variant                                                |
| rs570993098 | genic_upstream_transcript_variant,intron_variant                                                  |
| rs570999335 | genic_upstream_transcript_variant,intron_variant                                                  |
| rs571001808 | intron_variant                                                                                    |
| rs571014763 | genic_upstream_transcript_variant,intron_variant                                                  |
| rs571020696 | genic_downstream_transcript_variant,3_prime_UTR_variant,non_coding_transcript_variant             |
| rs571021707 | intron_variant                                                                                    |
| rs571027570 | intron_variant                                                                                    |
| rs571122923 | intron_variant                                                                                    |
| rs571145677 | genic_upstream_transcript_variant,intron_variant                                                  |
| rs571156532 | upstream_transcript_variant,genic_upstream_transcript_variant,intron_variant                      |
| rs571198784 | genic_upstream_transcript_variant,intron_variant                                                  |
| rs571208359 | genic_upstream_transcript_variant,intron_variant                                                  |
| rs571208389 | genic_upstream_transcript_variant,intron_variant                                                  |
| rs571243169 | intron_variant                                                                                    |
| rs571253866 | intron_variant                                                                                    |
| rs571262132 | genic_upstream_transcript_variant,intron_variant                                                  |
| rs571277516 | genic_downstream_transcript_variant,intron_variant                                                |
| rs571290716 | genic_downstream_transcript_variant,intron_variant                                                |

|             |                                                                                                                         |
|-------------|-------------------------------------------------------------------------------------------------------------------------|
| rs571347127 | intron_variant                                                                                                          |
| rs571363146 | intron_variant                                                                                                          |
| rs571369878 | intron_variant                                                                                                          |
| rs571397768 | genic_upstream_transcript_variant,intron_variant                                                                        |
| rs571403009 | genic_downstream_transcript_variant,intron_variant                                                                      |
| rs571419819 | genic_downstream_transcript_variant,intron_variant                                                                      |
| rs571453992 | missense_variant,non_coding_transcript_variant,genic_upstream_transcript_variant,coding_sequence_variant,intron_variant |
| rs571496258 | intron_variant                                                                                                          |
| rs571496301 | genic_downstream_transcript_variant,intron_variant                                                                      |
| rs571501976 | intron_variant                                                                                                          |
| rs571503749 | genic_upstream_transcript_variant,intron_variant                                                                        |
| rs571513386 | genic_downstream_transcript_variant,intron_variant                                                                      |
| rs571519188 | intron_variant                                                                                                          |
| rs571532416 | genic_downstream_transcript_variant,intron_variant                                                                      |
| rs571566952 | missense_variant,coding_sequence_variant,intron_variant                                                                 |
| rs571659316 | genic_downstream_transcript_variant,intron_variant                                                                      |
| rs571698885 | intron_variant                                                                                                          |
| rs571717363 | genic_downstream_transcript_variant,intron_variant                                                                      |
| rs571746962 | genic_downstream_transcript_variant,intron_variant                                                                      |
| rs571793113 | 5_prime_UTR_variant,upstream_transcript_variant,genic_upstream_transcript_variant,intron_variant                        |
| rs571794724 | genic_downstream_transcript_variant,intron_variant                                                                      |
| rs571813771 | intron_variant                                                                                                          |
| rs571838067 | intron_variant                                                                                                          |
| rs571846974 | intron_variant                                                                                                          |
| rs571856829 | upstream_transcript_variant,genic_upstream_transcript_variant,intron_variant                                            |
| rs571870925 | genic_downstream_transcript_variant,intron_variant                                                                      |
| rs571874671 | intron_variant                                                                                                          |
| rs571881076 | genic_upstream_transcript_variant,intron_variant                                                                        |
| rs571938291 | genic_upstream_transcript_variant,intron_variant                                                                        |
| rs572035958 | genic_upstream_transcript_variant,intron_variant                                                                        |
| rs572038412 | genic_upstream_transcript_variant,intron_variant                                                                        |
| rs572058092 | intron_variant                                                                                                          |
| rs572061828 | genic_upstream_transcript_variant,intron_variant                                                                        |
| rs572075442 | genic_upstream_transcript_variant,intron_variant                                                                        |
| rs572084726 | intron_variant                                                                                                          |
| rs572088455 | intron_variant                                                                                                          |
| rs572161353 | upstream_transcript_variant,2KB_upstream_variant,genic_upstream_transcript_variant,intron_variant                       |
| rs572172614 | genic_upstream_transcript_variant,intron_variant                                                                        |
| rs572172818 | intron_variant                                                                                                          |
| rs572233520 | intron_variant                                                                                                          |
| rs572253987 | genic_downstream_transcript_variant,intron_variant                                                                      |
| rs572266600 | intron_variant                                                                                                          |
| rs572293126 | genic_upstream_transcript_variant,intron_variant                                                                        |
| rs572315099 | genic_downstream_transcript_variant,intron_variant                                                                      |
| rs572333379 | genic_upstream_transcript_variant,intron_variant                                                                        |
| rs572342218 | intron_variant                                                                                                          |
| rs572350205 | genic_downstream_transcript_variant,intron_variant                                                                      |
| rs572358873 | genic_upstream_transcript_variant,intron_variant                                                                        |
| rs572366356 | upstream_transcript_variant,2KB_upstream_variant,genic_upstream_transcript_variant,intron_variant                       |
| rs572379502 | genic_downstream_transcript_variant,intron_variant                                                                      |
| rs572384348 | genic_upstream_transcript_variant,intron_variant                                                                        |
| rs572396298 | genic_upstream_transcript_variant,intron_variant                                                                        |
| rs572447489 | intron_variant                                                                                                          |
| rs572458221 | genic_upstream_transcript_variant,intron_variant                                                                        |
| rs572499967 | genic_upstream_transcript_variant,intron_variant                                                                        |
| rs572519162 | genic_upstream_transcript_variant,intron_variant                                                                        |
| rs572535159 | intron_variant                                                                                                          |
| rs572566741 | intron_variant                                                                                                          |
| rs572572112 | intron_variant                                                                                                          |
| rs572599245 | intron_variant                                                                                                          |
| rs572637047 | genic_downstream_transcript_variant,intron_variant                                                                      |
| rs572709519 | genic_upstream_transcript_variant,intron_variant                                                                        |
| rs572713479 | intron_variant                                                                                                          |
| rs572724690 | genic_downstream_transcript_variant,intron_variant                                                                      |
| rs572793775 | genic_upstream_transcript_variant,intron_variant                                                                        |
| rs572808693 | genic_upstream_transcript_variant,intron_variant                                                                        |
| rs572854237 | intron_variant                                                                                                          |
| rs572890551 | genic_upstream_transcript_variant,intron_variant                                                                        |
| rs572939708 | intron_variant                                                                                                          |
| rs572941913 | intron_variant                                                                                                          |
| rs572961673 | genic_upstream_transcript_variant,intron_variant                                                                        |
| rs572971674 | intron_variant                                                                                                          |
| rs572973569 | genic_upstream_transcript_variant,intron_variant                                                                        |
| rs573007894 | intron_variant                                                                                                          |

|             |                                                                                                   |
|-------------|---------------------------------------------------------------------------------------------------|
| rs573027298 | genic_downstream_transcript_variant,intron_variant                                                |
| rs573050256 | genic_upstream_transcript_variant,intron_variant                                                  |
| rs573071639 | intron_variant                                                                                    |
| rs573081576 | genic_upstream_transcript_variant,intron_variant                                                  |
| rs573122315 | genic_downstream_transcript_variant,intron_variant                                                |
| rs573147485 | intron_variant                                                                                    |
| rs573157234 | genic_upstream_transcript_variant,intron_variant                                                  |
| rs573181235 | intron_variant                                                                                    |
| rs573202121 | genic_downstream_transcript_variant,intron_variant                                                |
| rs573205008 | genic_downstream_transcript_variant,intron_variant                                                |
| rs573206724 | intron_variant                                                                                    |
| rs573289588 | intron_variant                                                                                    |
| rs573291461 | upstream_transcript_variant,2KB_upstream_variant,genic_upstream_transcript_variant,intron_variant |
| rs573331347 | genic_downstream_transcript_variant,intron_variant                                                |
| rs573358625 | genic_downstream_transcript_variant,3_prime_UTR_variant,non_coding_transcript_variant             |
| rs573362356 | genic_upstream_transcript_variant,intron_variant                                                  |
| rs573389176 | genic_downstream_transcript_variant,intron_variant                                                |
| rs573427683 | genic_upstream_transcript_variant,intron_variant                                                  |
| rs573427729 | genic_upstream_transcript_variant,intron_variant                                                  |
| rs573444859 | genic_downstream_transcript_variant,intron_variant                                                |
| rs573486887 | intron_variant                                                                                    |
| rs573497782 | genic_upstream_transcript_variant,intron_variant                                                  |
| rs573518389 | genic_upstream_transcript_variant,intron_variant                                                  |
| rs573571083 | genic_downstream_transcript_variant,intron_variant                                                |
| rs573601571 | intron_variant                                                                                    |
| rs573612778 | intron_variant                                                                                    |
| rs573652957 | genic_downstream_transcript_variant,intron_variant                                                |
| rs573673657 | intron_variant,genic_downstream_transcript_variant                                                |
| rs573735145 | intron_variant,genic_downstream_transcript_variant                                                |
| rs573744428 | genic_upstream_transcript_variant,intron_variant                                                  |
| rs573744962 | intron_variant,genic_downstream_transcript_variant                                                |
| rs573754983 | intron_variant                                                                                    |
| rs573757917 | intron_variant                                                                                    |
| rs573806094 | intron_variant                                                                                    |
| rs573857966 | intron_variant                                                                                    |
| rs573871866 | genic_upstream_transcript_variant,intron_variant                                                  |
| rs573892433 | genic_upstream_transcript_variant,intron_variant                                                  |
| rs573919186 | genic_upstream_transcript_variant,intron_variant                                                  |
| rs573968419 | intron_variant,genic_downstream_transcript_variant                                                |
| rs574005170 | genic_upstream_transcript_variant,intron_variant                                                  |
| rs574033435 | intron_variant,genic_downstream_transcript_variant                                                |
| rs574048051 | intron_variant                                                                                    |
| rs574073708 | intron_variant                                                                                    |
| rs574118941 | intron_variant                                                                                    |
| rs574139717 | intron_variant,genic_downstream_transcript_variant                                                |
| rs574146572 | intron_variant                                                                                    |
| rs574156340 | intron_variant                                                                                    |
| rs574162070 | intron_variant,genic_downstream_transcript_variant                                                |
| rs574174512 | genic_upstream_transcript_variant,intron_variant                                                  |
| rs574181371 | intron_variant                                                                                    |
| rs574187374 | genic_upstream_transcript_variant,intron_variant                                                  |
| rs574207921 | genic_upstream_transcript_variant,intron_variant                                                  |
| rs574286701 | genic_upstream_transcript_variant,intron_variant                                                  |
| rs574292626 | intron_variant                                                                                    |
| rs574309830 | intron_variant                                                                                    |
| rs574339494 | genic_upstream_transcript_variant,intron_variant                                                  |
| rs574340806 | genic_upstream_transcript_variant,intron_variant                                                  |
| rs574345243 | intron_variant                                                                                    |
| rs574345948 | genic_upstream_transcript_variant,intron_variant,upstream_transcript_variant                      |
| rs574350881 | downstream_transcript_variant,500B_downstream_variant                                             |
| rs574372059 | intron_variant,genic_downstream_transcript_variant                                                |
| rs574377673 | genic_upstream_transcript_variant,intron_variant                                                  |
| rs574393486 | genic_upstream_transcript_variant,intron_variant                                                  |
| rs574416910 | intron_variant                                                                                    |
| rs574434721 | genic_upstream_transcript_variant,intron_variant,upstream_transcript_variant                      |
| rs574459492 | intron_variant                                                                                    |
| rs574470929 | intron_variant                                                                                    |
| rs574508877 | genic_upstream_transcript_variant,intron_variant                                                  |
| rs574532537 | intron_variant                                                                                    |
| rs574549350 | genic_upstream_transcript_variant,intron_variant                                                  |
| rs574558797 | intron_variant                                                                                    |
| rs574571138 | genic_upstream_transcript_variant,intron_variant                                                  |
| rs574588938 | intron_variant                                                                                    |
| rs574603106 | intron_variant                                                                                    |

|             |                                                                                                            |
|-------------|------------------------------------------------------------------------------------------------------------|
| rs574604644 | genic_upstream_transcript_variant,intron_variant                                                           |
| rs574661581 | intron_variant,genic_downstream_transcript_variant                                                         |
| rs574678876 | intron_variant                                                                                             |
| rs574721805 | genic_upstream_transcript_variant,intron_variant                                                           |
| rs574732421 | genic_upstream_transcript_variant,intron_variant,upstream_transcript_variant,2KB_upstream_variant          |
| rs574738526 | intron_variant                                                                                             |
| rs574744049 | intron_variant                                                                                             |
| rs574748666 | 3_prime_UTR_variant,non_coding_transcript_variant,genic_downstream_transcript_variant                      |
| rs574769607 | intron_variant                                                                                             |
| rs574784356 | genic_upstream_transcript_variant,intron_variant                                                           |
| rs574832774 | intron_variant                                                                                             |
| rs574900373 | genic_upstream_transcript_variant,intron_variant                                                           |
| rs574936356 | missense_variant,non_coding_transcript_variant,genic_downstream_transcript_variant,coding_sequence_variant |
| rs574975510 | genic_upstream_transcript_variant,intron_variant                                                           |
| rs575003180 | genic_upstream_transcript_variant,intron_variant                                                           |
| rs575007643 | intron_variant                                                                                             |
| rs575043475 | genic_upstream_transcript_variant,intron_variant                                                           |
| rs575049652 | intron_variant                                                                                             |
| rs575062595 | intron_variant,genic_downstream_transcript_variant                                                         |
| rs575066344 | intron_variant                                                                                             |
| rs575070113 | genic_upstream_transcript_variant,intron_variant,upstream_transcript_variant,2KB_upstream_variant          |
| rs575079293 | intron_variant                                                                                             |
| rs575109043 | genic_upstream_transcript_variant,intron_variant                                                           |
| rs575130596 | genic_upstream_transcript_variant,intron_variant                                                           |
| rs575131608 | intron_variant,genic_downstream_transcript_variant                                                         |
| rs575179735 | genic_upstream_transcript_variant,intron_variant                                                           |
| rs575196693 | intron_variant                                                                                             |
| rs575213827 | intron_variant                                                                                             |
| rs575220693 | genic_upstream_transcript_variant,intron_variant                                                           |
| rs575237530 | intron_variant                                                                                             |
| rs575292866 | intron_variant                                                                                             |
| rs575311252 | intron_variant                                                                                             |
| rs575343932 | intron_variant                                                                                             |
| rs575380260 | intron_variant                                                                                             |
| rs575380383 | intron_variant,5_prime_UTR_variant                                                                         |
| rs575399236 | intron_variant                                                                                             |
| rs575419504 | intron_variant                                                                                             |
| rs575446186 | genic_upstream_transcript_variant,intron_variant                                                           |
| rs575484022 | genic_upstream_transcript_variant,intron_variant                                                           |
| rs575485755 | intron_variant                                                                                             |
| rs575489173 | intron_variant                                                                                             |
| rs575507752 | genic_upstream_transcript_variant,intron_variant                                                           |
| rs575514101 | intron_variant,genic_downstream_transcript_variant                                                         |
| rs575526225 | intron_variant,genic_downstream_transcript_variant                                                         |
| rs575554044 | intron_variant                                                                                             |
| rs575554130 | intron_variant                                                                                             |
| rs575594451 | intron_variant,genic_downstream_transcript_variant                                                         |
| rs575596679 | intron_variant                                                                                             |
| rs575629314 | intron_variant,genic_downstream_transcript_variant                                                         |
| rs575667775 | intron_variant,genic_downstream_transcript_variant                                                         |
| rs575824930 | intron_variant                                                                                             |
| rs575862671 | genic_upstream_transcript_variant,intron_variant                                                           |
| rs575953588 | intron_variant                                                                                             |
| rs575989051 | intron_variant                                                                                             |
| rs575989614 | genic_upstream_transcript_variant,intron_variant                                                           |
| rs576032137 | intron_variant,genic_downstream_transcript_variant                                                         |
| rs576035513 | intron_variant,genic_downstream_transcript_variant                                                         |
| rs576043573 | intron_variant                                                                                             |
| rs576063144 | genic_upstream_transcript_variant,intron_variant                                                           |
| rs576081949 | genic_upstream_transcript_variant,intron_variant                                                           |
| rs576101694 | intron_variant                                                                                             |
| rs576115847 | genic_upstream_transcript_variant,intron_variant                                                           |
| rs576122628 | intron_variant,genic_downstream_transcript_variant                                                         |
| rs576184179 | intron_variant                                                                                             |
| rs576211472 | genic_upstream_transcript_variant,intron_variant                                                           |
| rs576220662 | intron_variant                                                                                             |
| rs576278455 | genic_upstream_transcript_variant,intron_variant                                                           |
| rs576289256 | genic_upstream_transcript_variant,intron_variant                                                           |
| rs576339696 | genic_upstream_transcript_variant,intron_variant                                                           |
| rs576392373 | genic_upstream_transcript_variant,intron_variant                                                           |
| rs576448782 | genic_upstream_transcript_variant,intron_variant                                                           |
| rs576453691 | downstream_transcript_variant,500B_downstream_variant                                                      |
| rs576461271 | genic_upstream_transcript_variant,intron_variant                                                           |
| rs576504013 | intron_variant                                                                                             |

|             |                                                                                                   |
|-------------|---------------------------------------------------------------------------------------------------|
| rs576518957 | intron_variant,genic_downstream_transcript_variant                                                |
| rs576527146 | intron_variant                                                                                    |
| rs576564280 | intron_variant                                                                                    |
| rs576568770 | intron_variant                                                                                    |
| rs576575889 | intron_variant                                                                                    |
| rs576581350 | intron_variant                                                                                    |
| rs576585070 | genic_upstream_transcript_variant,intron_variant                                                  |
| rs576606062 | genic_upstream_transcript_variant,intron_variant                                                  |
| rs576634644 | genic_upstream_transcript_variant,intron_variant                                                  |
| rs576673110 | genic_upstream_transcript_variant,intron_variant                                                  |
| rs576757793 | intron_variant                                                                                    |
| rs576767989 | intron_variant                                                                                    |
| rs576782990 | genic_upstream_transcript_variant,intron_variant                                                  |
| rs576785477 | genic_upstream_transcript_variant,intron_variant                                                  |
| rs576821839 | intron_variant,genic_downstream_transcript_variant                                                |
| rs576834589 | genic_upstream_transcript_variant,intron_variant                                                  |
| rs576836414 | intron_variant                                                                                    |
| rs576847635 | genic_upstream_transcript_variant,intron_variant                                                  |
| rs576870616 | genic_upstream_transcript_variant,intron_variant                                                  |
| rs576911053 | genic_upstream_transcript_variant,intron_variant                                                  |
| rs576949323 | genic_upstream_transcript_variant,intron_variant                                                  |
| rs576981888 | genic_upstream_transcript_variant,intron_variant                                                  |
| rs576983482 | intron_variant                                                                                    |
| rs577002609 | intron_variant                                                                                    |
| rs577006830 | intron_variant                                                                                    |
| rs577020158 | intron_variant                                                                                    |
| rs577023937 | intron_variant                                                                                    |
| rs577093432 | intron_variant                                                                                    |
| rs577157545 | intron_variant,genic_downstream_transcript_variant                                                |
| rs577165620 | intron_variant                                                                                    |
| rs577166417 | intron_variant                                                                                    |
| rs577166923 | intron_variant                                                                                    |
| rs577177874 | genic_upstream_transcript_variant,intron_variant                                                  |
| rs577179703 | genic_upstream_transcript_variant,intron_variant                                                  |
| rs577201178 | intron_variant                                                                                    |
| rs577202790 | intron_variant                                                                                    |
| rs577241923 | genic_upstream_transcript_variant,intron_variant                                                  |
| rs577263709 | genic_upstream_transcript_variant,intron_variant                                                  |
| rs577297062 | genic_upstream_transcript_variant,intron_variant                                                  |
| rs577303897 | genic_upstream_transcript_variant,intron_variant                                                  |
| rs577306447 | genic_upstream_transcript_variant,intron_variant                                                  |
| rs577341637 | genic_upstream_transcript_variant,intron_variant,upstream_transcript_variant,2KB_upstream_variant |
| rs577346409 | genic_upstream_transcript_variant,intron_variant                                                  |
| rs577397101 | intron_variant                                                                                    |
| rs577416382 | 3_prime_UTR_variant,non_coding_transcript_variant,genic_downstream_transcript_variant             |
| rs577438837 | intron_variant                                                                                    |
| rs577476417 | intron_variant                                                                                    |
| rs577477223 | intron_variant,genic_downstream_transcript_variant                                                |
| rs577487381 | genic_upstream_transcript_variant,intron_variant                                                  |
| rs577527271 | genic_upstream_transcript_variant,intron_variant                                                  |
| rs577554043 | intron_variant                                                                                    |
| rs577555622 | intron_variant                                                                                    |
| rs577557245 | intron_variant                                                                                    |
| rs577583673 | intron_variant                                                                                    |
| rs577594470 | intron_variant                                                                                    |
| rs577605241 | 3_prime_UTR_variant,non_coding_transcript_variant,genic_downstream_transcript_variant             |
| rs577711272 | genic_upstream_transcript_variant,intron_variant                                                  |
| rs577740223 | genic_upstream_transcript_variant,intron_variant                                                  |
| rs577748502 | intron_variant                                                                                    |
| rs577758019 | intron_variant                                                                                    |
| rs577806852 | intron_variant,genic_downstream_transcript_variant                                                |
| rs577825127 | intron_variant                                                                                    |
| rs577860341 | intron_variant                                                                                    |
| rs577875975 | intron_variant,genic_downstream_transcript_variant                                                |
| rs577882321 | genic_upstream_transcript_variant,intron_variant                                                  |
| rs577968756 | genic_upstream_transcript_variant,intron_variant                                                  |
| rs577972915 | genic_upstream_transcript_variant,intron_variant,upstream_transcript_variant                      |
| rs577979091 | intron_variant                                                                                    |
| rs577980412 | genic_upstream_transcript_variant,intron_variant                                                  |
| rs577996339 | intron_variant,genic_downstream_transcript_variant                                                |
| rs578000565 | intron_variant                                                                                    |
| rs578015809 | intron_variant,genic_downstream_transcript_variant                                                |
| rs578015883 | intron_variant,genic_downstream_transcript_variant                                                |
| rs578049095 | genic_upstream_transcript_variant,intron_variant                                                  |

|             |                                                                                                                           |
|-------------|---------------------------------------------------------------------------------------------------------------------------|
| rs578056540 | genic_upstream_transcript_variant,intron_variant                                                                          |
| rs578078389 | intron_variant                                                                                                            |
| rs578082111 | genic_upstream_transcript_variant,intron_variant                                                                          |
| rs578103472 | intron_variant                                                                                                            |
| rs578150977 | genic_upstream_transcript_variant,intron_variant                                                                          |
| rs578199996 | genic_upstream_transcript_variant,intron_variant,upstream_transcript_variant,2KB_upstream_variant                         |
| rs578217943 | intron_variant                                                                                                            |
| rs578230532 | genic_upstream_transcript_variant,intron_variant                                                                          |
| rs578245798 | genic_upstream_transcript_variant,intron_variant                                                                          |
| rs578246193 | genic_upstream_transcript_variant,intron_variant                                                                          |
| rs745324745 | intron_variant,genic_downstream_transcript_variant                                                                        |
| rs745366999 | intron_variant,genic_downstream_transcript_variant                                                                        |
| rs745368078 | genic_upstream_transcript_variant,intron_variant                                                                          |
| rs745391152 | genic_upstream_transcript_variant,intron_variant,upstream_transcript_variant,2KB_upstream_variant                         |
| rs745423991 | non_coding_transcript_variant,intron_variant,genic_upstream_transcript_variant,missense_variant,coding_sequence_variant   |
| rs745448709 | intron_variant                                                                                                            |
| rs745492071 | genic_upstream_transcript_variant,intron_variant                                                                          |
| rs745514624 | intron_variant,genic_downstream_transcript_variant                                                                        |
| rs745516511 | genic_upstream_transcript_variant,intron_variant                                                                          |
| rs745524785 | intron_variant,genic_downstream_transcript_variant                                                                        |
| rs745531681 | missense_variant,non_coding_transcript_variant,coding_sequence_variant                                                    |
| rs745538300 | intron_variant,genic_downstream_transcript_variant                                                                        |
| rs745549295 | intron_variant,genic_downstream_transcript_variant                                                                        |
| rs745564729 | intron_variant,genic_downstream_transcript_variant                                                                        |
| rs745616260 | intron_variant                                                                                                            |
| rs745643473 | intron_variant                                                                                                            |
| rs745696924 | intron_variant                                                                                                            |
| rs745718484 | synonymous_variant,non_coding_transcript_variant,coding_sequence_variant                                                  |
| rs745726656 | synonymous_variant,5_prime_UTR_variant,non_coding_transcript_variant,coding_sequence_variant                              |
| rs745731122 | intron_variant                                                                                                            |
| rs745751463 | intron_variant,genic_downstream_transcript_variant                                                                        |
| rs745768685 | genic_upstream_transcript_variant,intron_variant                                                                          |
| rs745810421 | intron_variant,genic_downstream_transcript_variant                                                                        |
| rs745818057 | genic_upstream_transcript_variant,intron_variant                                                                          |
| rs745861246 | intron_variant                                                                                                            |
| rs745880601 | genic_upstream_transcript_variant,intron_variant                                                                          |
| rs745940688 | genic_upstream_transcript_variant,intron_variant                                                                          |
| rs745950412 | intron_variant                                                                                                            |
| rs745954717 | intron_variant                                                                                                            |
| rs745968500 | intron_variant                                                                                                            |
| rs745995913 | genic_upstream_transcript_variant,intron_variant                                                                          |
| rs746000857 | intron_variant                                                                                                            |
| rs746013159 | genic_upstream_transcript_variant,intron_variant                                                                          |
| rs746016639 | genic_upstream_transcript_variant,intron_variant                                                                          |
| rs746056678 | genic_upstream_transcript_variant,intron_variant                                                                          |
| rs746091644 | intron_variant,genic_downstream_transcript_variant                                                                        |
| rs746093579 | intron_variant                                                                                                            |
| rs746131555 | intron_variant                                                                                                            |
| rs746146071 | intron_variant                                                                                                            |
| rs746172777 | intron_variant                                                                                                            |
| rs746249527 | intron_variant                                                                                                            |
| rs746251950 | intron_variant,genic_downstream_transcript_variant                                                                        |
| rs746273927 | genic_upstream_transcript_variant,intron_variant                                                                          |
| rs746281781 | intron_variant                                                                                                            |
| rs746291237 | missense_variant,non_coding_transcript_variant,genic_downstream_transcript_variant,coding_sequence_variant                |
| rs746291919 | genic_upstream_transcript_variant,intron_variant                                                                          |
| rs746295363 | non_coding_transcript_variant,intron_variant,genic_upstream_transcript_variant,missense_variant,coding_sequence_variant   |
| rs746334800 | missense_variant,non_coding_transcript_variant,coding_sequence_variant                                                    |
| rs746338869 | intron_variant                                                                                                            |
| rs746353083 | missense_variant,non_coding_transcript_variant,genic_downstream_transcript_variant,coding_sequence_variant                |
| rs746360487 | intron_variant,genic_downstream_transcript_variant                                                                        |
| rs746379233 | genic_upstream_transcript_variant,intron_variant                                                                          |
| rs746388251 | missense_variant,non_coding_transcript_variant,coding_sequence_variant                                                    |
| rs746413882 | 3_prime_UTR_variant,non_coding_transcript_variant,genic_downstream_transcript_variant                                     |
| rs746437327 | intron_variant                                                                                                            |
| rs746450854 | intron_variant                                                                                                            |
| rs746470357 | intron_variant                                                                                                            |
| rs746494770 | non_coding_transcript_variant,intron_variant,genic_upstream_transcript_variant,synonymous_variant,coding_sequence_variant |
| rs746501922 | intron_variant                                                                                                            |
| rs746516047 | genic_upstream_transcript_variant,intron_variant                                                                          |
| rs746545921 | genic_upstream_transcript_variant,intron_variant                                                                          |
| rs746546046 | synonymous_variant,non_coding_transcript_variant,coding_sequence_variant                                                  |
| rs746595540 | genic_upstream_transcript_variant,intron_variant                                                                          |
| rs746606050 | genic_upstream_transcript_variant,intron_variant                                                                          |

|             |                                                                                                                         |
|-------------|-------------------------------------------------------------------------------------------------------------------------|
| rs746669230 | intron_variant                                                                                                          |
| rs746684452 | genic_upstream_transcript_variant,intron_variant,upstream_transcript_variant,2KB_upstream_variant                       |
| rs746689980 | intron_variant,genic_downstream_transcript_variant                                                                      |
| rs746734953 | missense_variant,non_coding_transcript_variant,coding_sequence_variant                                                  |
| rs746760646 | intron_variant                                                                                                          |
| rs746761310 | intron_variant,genic_downstream_transcript_variant                                                                      |
| rs746798601 | intron_variant                                                                                                          |
| rs746816156 | intron_variant,genic_downstream_transcript_variant                                                                      |
| rs746835458 | intron_variant,genic_downstream_transcript_variant                                                                      |
| rs746854646 | genic_upstream_transcript_variant,intron_variant                                                                        |
| rs746855633 | intron_variant                                                                                                          |
| rs746864274 | genic_upstream_transcript_variant,intron_variant                                                                        |
| rs746865243 | missense_variant,non_coding_transcript_variant,genic_downstream_transcript_variant,coding_sequence_variant              |
| rs746901685 | intron_variant,genic_downstream_transcript_variant                                                                      |
| rs746906141 | intron_variant                                                                                                          |
| rs746930982 | genic_upstream_transcript_variant,intron_variant                                                                        |
| rs746970798 | intron_variant                                                                                                          |
| rs747003224 | intron_variant,genic_downstream_transcript_variant                                                                      |
| rs747015667 | genic_upstream_transcript_variant,intron_variant,upstream_transcript_variant,2KB_upstream_variant                       |
| rs747055891 | intron_variant,genic_downstream_transcript_variant                                                                      |
| rs747089056 | intron_variant                                                                                                          |
| rs747107225 | intron_variant,genic_downstream_transcript_variant                                                                      |
| rs747138607 | non_coding_transcript_variant,intron_variant,genic_upstream_transcript_variant,missense_variant,coding_sequence_variant |
| rs747141434 | genic_upstream_transcript_variant,intron_variant                                                                        |
| rs747142105 | intron_variant                                                                                                          |
| rs747146480 | genic_upstream_transcript_variant,intron_variant                                                                        |
| rs747153060 | intron_variant                                                                                                          |
| rs747190582 | genic_upstream_transcript_variant,intron_variant                                                                        |
| rs747235459 | genic_upstream_transcript_variant,intron_variant                                                                        |
| rs747258269 | genic_upstream_transcript_variant,intron_variant                                                                        |
| rs747301810 | genic_upstream_transcript_variant,intron_variant                                                                        |
| rs747316358 | intron_variant,genic_downstream_transcript_variant                                                                      |
| rs747331344 | intron_variant                                                                                                          |
| rs747391719 | non_coding_transcript_variant,intron_variant,genic_upstream_transcript_variant,missense_variant,coding_sequence_variant |
| rs747447086 | intron_variant                                                                                                          |
| rs747450670 | intron_variant                                                                                                          |
| rs747464458 | intron_variant                                                                                                          |
| rs747473463 | intron_variant                                                                                                          |
| rs747516278 | genic_upstream_transcript_variant,intron_variant                                                                        |
| rs747528521 | synonymous_variant,non_coding_transcript_variant,coding_sequence_variant                                                |
| rs747538243 | 3_prime_UTR_variant,non_coding_transcript_variant,genic_downstream_transcript_variant                                   |
| rs747555073 | genic_upstream_transcript_variant,intron_variant                                                                        |
| rs747572262 | intron_variant,genic_downstream_transcript_variant                                                                      |
| rs747606954 | genic_upstream_transcript_variant,intron_variant                                                                        |
| rs747649577 | intron_variant                                                                                                          |
| rs747665246 | intron_variant                                                                                                          |
| rs747729085 | intron_variant,genic_downstream_transcript_variant                                                                      |
| rs747729860 | intron_variant                                                                                                          |
| rs747761472 | intron_variant                                                                                                          |
| rs747791360 | intron_variant                                                                                                          |
| rs747878642 | intron_variant                                                                                                          |
| rs747887276 | intron_variant,genic_downstream_transcript_variant                                                                      |
| rs747891294 | genic_upstream_transcript_variant,intron_variant                                                                        |
| rs747926452 | intron_variant,genic_downstream_transcript_variant                                                                      |
| rs747936472 | intron_variant                                                                                                          |
| rs747963694 | genic_upstream_transcript_variant,intron_variant                                                                        |
| rs747982314 | missense_variant,non_coding_transcript_variant,coding_sequence_variant                                                  |
| rs748010112 | intron_variant,genic_downstream_transcript_variant                                                                      |
| rs748013016 | intron_variant                                                                                                          |
| rs748035435 | intron_variant                                                                                                          |
| rs748042018 | genic_upstream_transcript_variant,intron_variant                                                                        |
| rs748074774 | intron_variant,genic_downstream_transcript_variant                                                                      |
| rs748117822 | intron_variant                                                                                                          |
| rs748178409 | intron_variant,genic_downstream_transcript_variant                                                                      |
| rs748207507 | intron_variant,genic_downstream_transcript_variant                                                                      |
| rs748249800 | intron_variant                                                                                                          |
| rs748262827 | genic_upstream_transcript_variant,intron_variant                                                                        |
| rs748269416 | genic_upstream_transcript_variant,intron_variant                                                                        |
| rs748277452 | genic_upstream_transcript_variant,intron_variant                                                                        |
| rs748279701 | intron_variant                                                                                                          |
| rs748305839 | intron_variant,genic_downstream_transcript_variant                                                                      |
| rs748314633 | intron_variant                                                                                                          |
| rs748315409 | intron_variant                                                                                                          |
| rs748325092 | genic_upstream_transcript_variant,intron_variant                                                                        |

|             |                                                                                                                           |
|-------------|---------------------------------------------------------------------------------------------------------------------------|
| rs748328299 | genic_upstream_transcript_variant,intron_variant                                                                          |
| rs748411634 | intron_variant,genic_downstream_transcript_variant                                                                        |
| rs748415091 | genic_upstream_transcript_variant,intron_variant,upstream_transcript_variant,2KB_upstream_variant                         |
| rs748430872 | genic_upstream_transcript_variant,intron_variant                                                                          |
| rs748436276 | intron_variant                                                                                                            |
| rs748447008 | intron_variant                                                                                                            |
| rs748494471 | intron_variant                                                                                                            |
| rs748547585 | intron_variant                                                                                                            |
| rs748628043 | intron_variant                                                                                                            |
| rs748629100 | genic_upstream_transcript_variant,intron_variant                                                                          |
| rs748636241 | intron_variant                                                                                                            |
| rs748661147 | synonymous_variant,non_coding_transcript_variant,genic_downstream_transcript_variant,coding_sequence_variant              |
| rs748742882 | intron_variant,genic_downstream_transcript_variant                                                                        |
| rs748756462 | intron_variant,genic_downstream_transcript_variant                                                                        |
| rs748773382 | intron_variant                                                                                                            |
| rs748776466 | non_coding_transcript_variant,intron_variant,genic_upstream_transcript_variant,missense_variant,coding_sequence_variant   |
| rs748818807 | missense_variant,synonymous_variant,intron_variant,coding_sequence_variant                                                |
| rs748829868 | genic_upstream_transcript_variant,intron_variant                                                                          |
| rs748833988 | genic_upstream_transcript_variant,intron_variant                                                                          |
| rs748841205 | genic_upstream_transcript_variant,intron_variant                                                                          |
| rs748868626 | genic_upstream_transcript_variant,intron_variant                                                                          |
| rs748906576 | downstream_transcript_variant,500B_downstream_variant                                                                     |
| rs748917309 | genic_upstream_transcript_variant,intron_variant                                                                          |
| rs748922103 | intron_variant                                                                                                            |
| rs748923998 | genic_upstream_transcript_variant,intron_variant                                                                          |
| rs748954119 | genic_upstream_transcript_variant,intron_variant                                                                          |
| rs748978073 | intron_variant,genic_downstream_transcript_variant                                                                        |
| rs749013392 | intron_variant                                                                                                            |
| rs749022411 | genic_upstream_transcript_variant,intron_variant                                                                          |
| rs749064648 | intron_variant                                                                                                            |
| rs749069628 | intron_variant                                                                                                            |
| rs749082043 | non_coding_transcript_variant,intron_variant,genic_upstream_transcript_variant,missense_variant,coding_sequence_variant   |
| rs749082857 | intron_variant,genic_downstream_transcript_variant                                                                        |
| rs749086707 | intron_variant,genic_downstream_transcript_variant                                                                        |
| rs749099626 | genic_upstream_transcript_variant,intron_variant,upstream_transcript_variant,2KB_upstream_variant                         |
| rs749120760 | intron_variant                                                                                                            |
| rs749121133 | intron_variant                                                                                                            |
| rs749122405 | non_coding_transcript_variant,intron_variant,genic_upstream_transcript_variant,synonymous_variant,coding_sequence_variant |
| rs749134628 | intron_variant                                                                                                            |
| rs749152789 | intron_variant                                                                                                            |
| rs749156725 | intron_variant                                                                                                            |
| rs749177488 | genic_upstream_transcript_variant,intron_variant                                                                          |
| rs749200333 | genic_upstream_transcript_variant,intron_variant                                                                          |
| rs749253844 | intron_variant,genic_downstream_transcript_variant                                                                        |
| rs749259118 | genic_upstream_transcript_variant,intron_variant                                                                          |
| rs749302092 | intron_variant                                                                                                            |
| rs749313721 | intron_variant                                                                                                            |
| rs749359098 | intron_variant                                                                                                            |
| rs749364285 | intron_variant                                                                                                            |
| rs749374553 | genic_upstream_transcript_variant,intron_variant                                                                          |
| rs749395525 | intron_variant                                                                                                            |
| rs749405158 | genic_upstream_transcript_variant,intron_variant                                                                          |
| rs749426056 | intron_variant,genic_downstream_transcript_variant                                                                        |
| rs749434465 | genic_upstream_transcript_variant,intron_variant                                                                          |
| rs749435032 | genic_upstream_transcript_variant,intron_variant                                                                          |
| rs749438942 | synonymous_variant,non_coding_transcript_variant,genic_downstream_transcript_variant,coding_sequence_variant              |
| rs749452784 | genic_upstream_transcript_variant,intron_variant                                                                          |
| rs749472993 | genic_upstream_transcript_variant,intron_variant                                                                          |
| rs749481056 | intron_variant,genic_downstream_transcript_variant                                                                        |
| rs749533070 | intron_variant                                                                                                            |
| rs749537778 | intron_variant                                                                                                            |
| rs749577114 | genic_upstream_transcript_variant,intron_variant                                                                          |
| rs749580508 | intron_variant                                                                                                            |
| rs749588045 | intron_variant,genic_downstream_transcript_variant                                                                        |
| rs749598612 | intron_variant                                                                                                            |
| rs749625939 | intron_variant,genic_downstream_transcript_variant                                                                        |
| rs749648392 | intron_variant                                                                                                            |
| rs749650711 | intron_variant,genic_upstream_transcript_variant                                                                          |
| rs749702072 | intron_variant,genic_upstream_transcript_variant,2KB_upstream_variant,upstream_transcript_variant                         |
| rs749736139 | coding_sequence_variant,missense_variant,non_coding_transcript_variant                                                    |
| rs749744230 | intron_variant,genic_upstream_transcript_variant                                                                          |
| rs749749352 | intron_variant,genic_upstream_transcript_variant                                                                          |
| rs749766519 | intron_variant,genic_downstream_transcript_variant                                                                        |
| rs749777197 | intron_variant,genic_downstream_transcript_variant                                                                        |

|             |                                                                                                                           |
|-------------|---------------------------------------------------------------------------------------------------------------------------|
| rs749821599 | 3_prime_UTR_variant,genic_downstream_transcript_variant,non_coding_transcript_variant                                     |
| rs749848254 | intron_variant,genic_downstream_transcript_variant                                                                        |
| rs749848531 | intron_variant,genic_upstream_transcript_variant                                                                          |
| rs749876472 | intron_variant                                                                                                            |
| rs749903262 | intron_variant,genic_downstream_transcript_variant                                                                        |
| rs749927665 | intron_variant,genic_downstream_transcript_variant                                                                        |
| rs749934142 | intron_variant                                                                                                            |
| rs750025736 | intron_variant                                                                                                            |
| rs750055538 | intron_variant,genic_downstream_transcript_variant                                                                        |
| rs750085561 | intron_variant                                                                                                            |
| rs750144857 | intron_variant,genic_upstream_transcript_variant                                                                          |
| rs750155301 | intron_variant                                                                                                            |
| rs750161206 | intron_variant,genic_downstream_transcript_variant                                                                        |
| rs750162418 | intron_variant,genic_upstream_transcript_variant                                                                          |
| rs750172603 | intron_variant,genic_upstream_transcript_variant                                                                          |
| rs750188400 | genic_upstream_transcript_variant,synonymous_variant,intron_variant,non_coding_transcript_variant,coding_sequence_variant |
| rs750198737 | intron_variant,genic_downstream_transcript_variant                                                                        |
| rs750200033 | intron_variant,genic_upstream_transcript_variant                                                                          |
| rs750225996 | intron_variant,genic_upstream_transcript_variant                                                                          |
| rs750238911 | intron_variant                                                                                                            |
| rs750246464 | intron_variant,genic_upstream_transcript_variant                                                                          |
| rs750249902 | intron_variant,genic_downstream_transcript_variant                                                                        |
| rs750272033 | intron_variant,genic_upstream_transcript_variant                                                                          |
| rs750276956 | coding_sequence_variant,missense_variant,non_coding_transcript_variant                                                    |
| rs750318380 | intron_variant                                                                                                            |
| rs750386119 | intron_variant                                                                                                            |
| rs750407774 | intron_variant,genic_upstream_transcript_variant,2KB_upstream_variant,upstream_transcript_variant                         |
| rs750421436 | intron_variant,genic_downstream_transcript_variant                                                                        |
| rs750427793 | intron_variant,genic_downstream_transcript_variant                                                                        |
| rs750431672 | intron_variant,genic_upstream_transcript_variant                                                                          |
| rs750451385 | intron_variant,genic_downstream_transcript_variant                                                                        |
| rs750463659 | intron_variant                                                                                                            |
| rs750481539 | intron_variant,genic_upstream_transcript_variant                                                                          |
| rs750486793 | intron_variant,genic_upstream_transcript_variant                                                                          |
| rs750499702 | intron_variant,genic_downstream_transcript_variant                                                                        |
| rs750506239 | intron_variant,genic_downstream_transcript_variant                                                                        |
| rs750511986 | intron_variant,genic_downstream_transcript_variant                                                                        |
| rs750514432 | intron_variant,genic_upstream_transcript_variant                                                                          |
| rs750520213 | intron_variant                                                                                                            |
| rs750565007 | intron_variant,genic_downstream_transcript_variant                                                                        |
| rs750584357 | intron_variant                                                                                                            |
| rs750597048 | intron_variant                                                                                                            |
| rs750629072 | intron_variant,genic_upstream_transcript_variant                                                                          |
| rs750665552 | intron_variant,genic_upstream_transcript_variant                                                                          |
| rs750763063 | intron_variant                                                                                                            |
| rs750763620 | intron_variant                                                                                                            |
| rs750792697 | coding_sequence_variant,missense_variant,non_coding_transcript_variant                                                    |
| rs750811600 | 3_prime_UTR_variant,genic_downstream_transcript_variant,non_coding_transcript_variant                                     |
| rs750813608 | downstream_transcript_variant,500B_downstream_variant                                                                     |
| rs750820405 | genic_upstream_transcript_variant,synonymous_variant,intron_variant,non_coding_transcript_variant,coding_sequence_variant |
| rs750821229 | intron_variant                                                                                                            |
| rs750858911 | coding_sequence_variant,genic_downstream_transcript_variant,non_coding_transcript_variant,synonymous_variant              |
| rs750873058 | intron_variant,genic_upstream_transcript_variant                                                                          |
| rs750874023 | intron_variant                                                                                                            |
| rs750895431 | intron_variant,genic_upstream_transcript_variant                                                                          |
| rs750927198 | intron_variant,genic_upstream_transcript_variant                                                                          |
| rs750951259 | intron_variant,genic_downstream_transcript_variant                                                                        |
| rs750956494 | intron_variant,genic_downstream_transcript_variant                                                                        |
| rs750973154 | intron_variant                                                                                                            |
| rs751041644 | intron_variant                                                                                                            |
| rs751057241 | intron_variant,genic_downstream_transcript_variant                                                                        |
| rs751079775 | intron_variant                                                                                                            |
| rs751090845 | intron_variant,genic_downstream_transcript_variant                                                                        |
| rs751101285 | coding_sequence_variant,intron_variant,missense_variant                                                                   |
| rs751118933 | intron_variant                                                                                                            |
| rs751138529 | intron_variant,genic_upstream_transcript_variant                                                                          |
| rs751139564 | intron_variant,genic_upstream_transcript_variant                                                                          |
| rs751140286 | intron_variant,genic_upstream_transcript_variant                                                                          |
| rs751159881 | intron_variant,genic_upstream_transcript_variant                                                                          |
| rs751232626 | intron_variant,genic_upstream_transcript_variant                                                                          |
| rs751239059 | missense_variant,genic_upstream_transcript_variant,intron_variant,non_coding_transcript_variant,coding_sequence_variant   |
| rs751258225 | intron_variant                                                                                                            |
| rs751262367 | intron_variant,genic_upstream_transcript_variant                                                                          |
| rs751267613 | intron_variant,genic_upstream_transcript_variant,2KB_upstream_variant,upstream_transcript_variant                         |

|             |                                                                                                                                     |
|-------------|-------------------------------------------------------------------------------------------------------------------------------------|
| rs751276578 | intron_variant,genic_downstream_transcript_variant                                                                                  |
| rs751291529 | intron_variant,genic_downstream_transcript_variant                                                                                  |
| rs751325832 | intron_variant,genic_downstream_transcript_variant                                                                                  |
| rs751368503 | intron_variant,genic_upstream_transcript_variant                                                                                    |
| rs751375580 | intron_variant,genic_downstream_transcript_variant,downstream_transcript_variant                                                    |
| rs751389705 | intron_variant                                                                                                                      |
| rs751421114 | intron_variant                                                                                                                      |
| rs751423676 | intron_variant,genic_upstream_transcript_variant                                                                                    |
| rs751484088 | intron_variant,genic_upstream_transcript_variant                                                                                    |
| rs751493573 | intron_variant                                                                                                                      |
| rs751495627 | intron_variant                                                                                                                      |
| rs751521116 | intron_variant,genic_upstream_transcript_variant                                                                                    |
| rs751541593 | intron_variant,genic_upstream_transcript_variant                                                                                    |
| rs751555216 | intron_variant,genic_upstream_transcript_variant                                                                                    |
| rs751570611 | intron_variant,genic_downstream_transcript_variant                                                                                  |
| rs751572663 | missense_variant,genic_upstream_transcript_variant,intron_variant,non_coding_transcript_variant,coding_sequence_variant,stop_gained |
| rs751586503 | intron_variant,genic_downstream_transcript_variant                                                                                  |
| rs751613983 | intron_variant                                                                                                                      |
| rs751721014 | intron_variant                                                                                                                      |
| rs751721710 | intron_variant,genic_upstream_transcript_variant                                                                                    |
| rs751729200 | coding_sequence_variant,missense_variant,genic_downstream_transcript_variant,non_coding_transcript_variant                          |
| rs751742182 | intron_variant                                                                                                                      |
| rs751758734 | intron_variant,genic_upstream_transcript_variant                                                                                    |
| rs751781411 | intron_variant,genic_upstream_transcript_variant                                                                                    |
| rs751784236 | 3_prime_UTR_variant,genic_downstream_transcript_variant,non_coding_transcript_variant                                               |
| rs751785708 | intron_variant,genic_downstream_transcript_variant                                                                                  |
| rs751829190 | intron_variant                                                                                                                      |
| rs751881668 | intron_variant                                                                                                                      |
| rs751907602 | coding_sequence_variant,missense_variant,non_coding_transcript_variant                                                              |
| rs751909561 | intron_variant                                                                                                                      |
| rs751909630 | coding_sequence_variant,missense_variant,genic_downstream_transcript_variant,non_coding_transcript_variant                          |
| rs751942482 | intron_variant                                                                                                                      |
| rs751945581 | intron_variant                                                                                                                      |
| rs751955874 | intron_variant,genic_downstream_transcript_variant                                                                                  |
| rs751959253 | intron_variant,genic_downstream_transcript_variant                                                                                  |
| rs751962456 | intron_variant                                                                                                                      |
| rs751962539 | intron_variant,genic_downstream_transcript_variant,downstream_transcript_variant                                                    |
| rs751972395 | intron_variant                                                                                                                      |
| rs751983533 | intron_variant                                                                                                                      |
| rs752021129 | intron_variant,genic_upstream_transcript_variant                                                                                    |
| rs752042664 | intron_variant,genic_upstream_transcript_variant                                                                                    |
| rs752055485 | missense_variant,genic_upstream_transcript_variant,intron_variant,non_coding_transcript_variant,coding_sequence_variant             |
| rs752080939 | intron_variant                                                                                                                      |
| rs752105100 | intron_variant,genic_upstream_transcript_variant                                                                                    |
| rs752121634 | intron_variant                                                                                                                      |
| rs752179199 | intron_variant,genic_downstream_transcript_variant                                                                                  |
| rs752219165 | intron_variant,genic_downstream_transcript_variant                                                                                  |
| rs752229925 | intron_variant                                                                                                                      |
| rs752234308 | intron_variant                                                                                                                      |
| rs752235438 | intron_variant                                                                                                                      |
| rs752243890 | intron_variant,genic_downstream_transcript_variant                                                                                  |
| rs752244121 | intron_variant                                                                                                                      |
| rs752246483 | intron_variant                                                                                                                      |
| rs752269312 | intron_variant,genic_upstream_transcript_variant                                                                                    |
| rs752281264 | coding_sequence_variant,missense_variant,non_coding_transcript_variant,5_prime_UTR_variant                                          |
| rs752290576 | intron_variant                                                                                                                      |
| rs752299863 | intron_variant,genic_upstream_transcript_variant                                                                                    |
| rs752327398 | intron_variant                                                                                                                      |
| rs752349336 | genic_upstream_transcript_variant,intron_variant,non_coding_transcript_variant,coding_sequence_variant,frameshift_variant           |
| rs752436091 | intron_variant,genic_downstream_transcript_variant                                                                                  |
| rs752446675 | intron_variant,genic_upstream_transcript_variant                                                                                    |
| rs752448982 | intron_variant,genic_downstream_transcript_variant                                                                                  |
| rs752452201 | intron_variant,genic_downstream_transcript_variant                                                                                  |
| rs752480046 | intron_variant                                                                                                                      |
| rs752484484 | intron_variant                                                                                                                      |
| rs752495532 | missense_variant,genic_upstream_transcript_variant,intron_variant,non_coding_transcript_variant,coding_sequence_variant             |
| rs752515251 | intron_variant                                                                                                                      |
| rs752516881 | intron_variant                                                                                                                      |
| rs752531321 | intron_variant                                                                                                                      |
| rs752535640 | coding_sequence_variant,non_coding_transcript_variant,synonymous_variant                                                            |
| rs752576180 | intron_variant,genic_upstream_transcript_variant                                                                                    |
| rs752593587 | coding_sequence_variant,genic_downstream_transcript_variant,non_coding_transcript_variant,synonymous_variant                        |
| rs752610969 | intron_variant,genic_upstream_transcript_variant                                                                                    |
| rs752618630 | intron_variant,genic_downstream_transcript_variant,downstream_transcript_variant                                                    |

|             |                                                                                                                                     |
|-------------|-------------------------------------------------------------------------------------------------------------------------------------|
| rs752631943 | intron_variant,genic_upstream_transcript_variant                                                                                    |
| rs752678356 | intron_variant,genic_upstream_transcript_variant                                                                                    |
| rs752683210 | intron_variant,genic_upstream_transcript_variant                                                                                    |
| rs752686328 | intron_variant,genic_upstream_transcript_variant                                                                                    |
| rs752740791 | coding_sequence_variant,missense_variant,non_coding_transcript_variant                                                              |
| rs752778502 | intron_variant,genic_downstream_transcript_variant                                                                                  |
| rs752779566 | intron_variant,genic_upstream_transcript_variant                                                                                    |
| rs752823191 | 3_prime_UTR_variant,genic_downstream_transcript_variant,non_coding_transcript_variant                                               |
| rs752837137 | intron_variant,genic_downstream_transcript_variant                                                                                  |
| rs752850047 | intron_variant,genic_downstream_transcript_variant,downstream_transcript_variant                                                    |
| rs752866538 | intron_variant,genic_upstream_transcript_variant                                                                                    |
| rs752898916 | intron_variant                                                                                                                      |
| rs752921667 | intron_variant,genic_upstream_transcript_variant                                                                                    |
| rs752937307 | intron_variant                                                                                                                      |
| rs752948862 | intron_variant,genic_upstream_transcript_variant                                                                                    |
| rs752977785 | intron_variant,genic_upstream_transcript_variant                                                                                    |
| rs753000586 | intron_variant                                                                                                                      |
| rs753009009 | intron_variant                                                                                                                      |
| rs753027254 | intron_variant,genic_upstream_transcript_variant                                                                                    |
| rs753036415 | intron_variant,genic_downstream_transcript_variant                                                                                  |
| rs753091019 | coding_sequence_variant,missense_variant,non_coding_transcript_variant                                                              |
| rs753102751 | intron_variant,genic_upstream_transcript_variant                                                                                    |
| rs753125607 | intron_variant,genic_upstream_transcript_variant                                                                                    |
| rs753135733 | intron_variant,genic_downstream_transcript_variant                                                                                  |
| rs753136699 | intron_variant                                                                                                                      |
| rs753190193 | intron_variant                                                                                                                      |
| rs753203317 | intron_variant,genic_downstream_transcript_variant                                                                                  |
| rs753267370 | intron_variant,genic_downstream_transcript_variant                                                                                  |
| rs753271673 | intron_variant,genic_upstream_transcript_variant                                                                                    |
| rs753291080 | intron_variant,genic_upstream_transcript_variant,2KB_upstream_variant,upstream_transcript_variant                                   |
| rs753309112 | genic_upstream_transcript_variant,synonymous_variant,intron_variant,non_coding_transcript_variant,coding_sequence_variant           |
| rs753311682 | intron_variant                                                                                                                      |
| rs753347670 | intron_variant,genic_downstream_transcript_variant                                                                                  |
| rs753349495 | intron_variant,genic_upstream_transcript_variant                                                                                    |
| rs753356451 | intron_variant                                                                                                                      |
| rs753362371 | intron_variant                                                                                                                      |
| rs753400437 | intron_variant,genic_upstream_transcript_variant                                                                                    |
| rs753409176 | intron_variant,genic_upstream_transcript_variant                                                                                    |
| rs753426615 | intron_variant                                                                                                                      |
| rs753557906 | intron_variant,genic_upstream_transcript_variant                                                                                    |
| rs753583632 | intron_variant,genic_downstream_transcript_variant                                                                                  |
| rs753588663 | intron_variant,genic_upstream_transcript_variant,2KB_upstream_variant,upstream_transcript_variant                                   |
| rs753615961 | intron_variant                                                                                                                      |
| rs753621571 | intron_variant                                                                                                                      |
| rs753654815 | intron_variant                                                                                                                      |
| rs753693782 | intron_variant,genic_upstream_transcript_variant                                                                                    |
| rs753694421 | intron_variant,genic_upstream_transcript_variant                                                                                    |
| rs753713629 | coding_sequence_variant,missense_variant,non_coding_transcript_variant                                                              |
| rs753722970 | intron_variant,genic_downstream_transcript_variant                                                                                  |
| rs753752972 | intron_variant,genic_downstream_transcript_variant                                                                                  |
| rs753759661 | intron_variant,genic_upstream_transcript_variant                                                                                    |
| rs753762177 | missense_variant,genic_upstream_transcript_variant,intron_variant,non_coding_transcript_variant,coding_sequence_variant,stop_gained |
| rs753783838 | intron_variant,genic_downstream_transcript_variant                                                                                  |
| rs753836275 | intron_variant,genic_downstream_transcript_variant                                                                                  |
| rs753877026 | intron_variant,genic_downstream_transcript_variant                                                                                  |
| rs753889604 | intron_variant                                                                                                                      |
| rs753911898 | coding_sequence_variant,missense_variant,non_coding_transcript_variant                                                              |
| rs753934337 | intron_variant,genic_upstream_transcript_variant                                                                                    |
| rs753944287 | 3_prime_UTR_variant,genic_downstream_transcript_variant,non_coding_transcript_variant                                               |
| rs753979601 | intron_variant,genic_downstream_transcript_variant                                                                                  |
| rs753987432 | intron_variant,genic_upstream_transcript_variant                                                                                    |
| rs754011564 | intron_variant                                                                                                                      |
| rs754017864 | intron_variant                                                                                                                      |
| rs754047456 | intron_variant                                                                                                                      |
| rs754083112 | intron_variant                                                                                                                      |
| rs754103262 | intron_variant                                                                                                                      |
| rs754106906 | coding_sequence_variant,missense_variant,genic_downstream_transcript_variant,non_coding_transcript_variant                          |
| rs754148023 | intron_variant,genic_upstream_transcript_variant                                                                                    |
| rs754179332 | 3_prime_UTR_variant,genic_downstream_transcript_variant,non_coding_transcript_variant                                               |
| rs754198809 | intron_variant                                                                                                                      |
| rs754229793 | intron_variant                                                                                                                      |
| rs754240211 | intron_variant                                                                                                                      |
| rs754247965 | intron_variant                                                                                                                      |
| rs754251596 | intron_variant,genic_upstream_transcript_variant                                                                                    |

|             |                                                                                                                           |
|-------------|---------------------------------------------------------------------------------------------------------------------------|
| rs754272780 | intron_variant,genic_upstream_transcript_variant                                                                          |
| rs754276218 | intron_variant,genic_upstream_transcript_variant                                                                          |
| rs754321742 | intron_variant,genic_upstream_transcript_variant                                                                          |
| rs754383158 | intron_variant,genic_downstream_transcript_variant                                                                        |
| rs754389367 | intron_variant                                                                                                            |
| rs754415763 | intron_variant                                                                                                            |
| rs754418396 | intron_variant                                                                                                            |
| rs754469552 | intron_variant,genic_downstream_transcript_variant                                                                        |
| rs754474067 | intron_variant,genic_upstream_transcript_variant                                                                          |
| rs754505927 | intron_variant                                                                                                            |
| rs754512854 | intron_variant                                                                                                            |
| rs754534808 | intron_variant,genic_downstream_transcript_variant                                                                        |
| rs754586331 | intron_variant                                                                                                            |
| rs754643525 | intron_variant,genic_downstream_transcript_variant                                                                        |
| rs754648829 | intron_variant                                                                                                            |
| rs754680405 | intron_variant                                                                                                            |
| rs754700435 | intron_variant,genic_downstream_transcript_variant                                                                        |
| rs754706203 | intron_variant,genic_upstream_transcript_variant                                                                          |
| rs754719339 | intron_variant,genic_upstream_transcript_variant                                                                          |
| rs754720043 | intron_variant                                                                                                            |
| rs754762636 | intron_variant,genic_upstream_transcript_variant                                                                          |
| rs754775087 | intron_variant                                                                                                            |
| rs754818565 | intron_variant,genic_upstream_transcript_variant                                                                          |
| rs754820465 | genic_upstream_transcript_variant,synonymous_variant,intron_variant,non_coding_transcript_variant,coding_sequence_variant |
| rs754825675 | intron_variant,genic_upstream_transcript_variant                                                                          |
| rs754880183 | intron_variant,genic_downstream_transcript_variant                                                                        |
| rs754938238 | intron_variant,genic_upstream_transcript_variant                                                                          |
| rs754950066 | intron_variant                                                                                                            |
| rs754953870 | intron_variant,genic_downstream_transcript_variant                                                                        |
| rs755000162 | 3_prime_UTR_variant,genic_downstream_transcript_variant,non_coding_transcript_variant                                     |
| rs755059519 | intron_variant                                                                                                            |
| rs755109343 | intron_variant,genic_downstream_transcript_variant                                                                        |
| rs755115906 | intron_variant                                                                                                            |
| rs755129209 | intron_variant                                                                                                            |
| rs755150048 | intron_variant,genic_upstream_transcript_variant                                                                          |
| rs755150738 | intron_variant,genic_downstream_transcript_variant                                                                        |
| rs755194593 | coding_sequence_variant,missense_variant,non_coding_transcript_variant                                                    |
| rs755210486 | intron_variant,genic_upstream_transcript_variant                                                                          |
| rs755216488 | intron_variant                                                                                                            |
| rs755234289 | intron_variant,genic_downstream_transcript_variant                                                                        |
| rs755260834 | intron_variant,genic_upstream_transcript_variant                                                                          |
| rs755323728 | intron_variant,genic_upstream_transcript_variant                                                                          |
| rs755336603 | intron_variant,genic_upstream_transcript_variant                                                                          |
| rs755350357 | intron_variant                                                                                                            |
| rs755353954 | intron_variant,genic_upstream_transcript_variant                                                                          |
| rs755359106 | intron_variant,genic_downstream_transcript_variant                                                                        |
| rs755382741 | intron_variant                                                                                                            |
| rs755409392 | intron_variant,genic_upstream_transcript_variant                                                                          |
| rs755411892 | intron_variant,genic_upstream_transcript_variant                                                                          |
| rs755438694 | intron_variant                                                                                                            |
| rs755467912 | intron_variant,genic_upstream_transcript_variant                                                                          |
| rs755470995 | coding_sequence_variant,non_coding_transcript_variant,synonymous_variant                                                  |
| rs755481360 | intron_variant,genic_upstream_transcript_variant                                                                          |
| rs755487203 | coding_sequence_variant,missense_variant,non_coding_transcript_variant                                                    |
| rs755506358 | intron_variant                                                                                                            |
| rs755533373 | intron_variant                                                                                                            |
| rs755535168 | intron_variant,genic_downstream_transcript_variant                                                                        |
| rs755557635 | intron_variant                                                                                                            |
| rs755576622 | intron_variant,genic_upstream_transcript_variant                                                                          |
| rs755627167 | intron_variant,genic_downstream_transcript_variant                                                                        |
| rs755641157 | intron_variant                                                                                                            |
| rs755641668 | intron_variant                                                                                                            |
| rs755694349 | intron_variant                                                                                                            |
| rs755709342 | intron_variant,genic_upstream_transcript_variant                                                                          |
| rs755734829 | intron_variant,genic_upstream_transcript_variant                                                                          |
| rs755765275 | intron_variant                                                                                                            |
| rs755802076 | intron_variant,genic_upstream_transcript_variant                                                                          |
| rs755816605 | coding_sequence_variant,intron_variant,synonymous_variant                                                                 |
| rs755821605 | intron_variant,genic_downstream_transcript_variant                                                                        |
| rs755822176 | intron_variant                                                                                                            |
| rs755827594 | intron_variant,genic_upstream_transcript_variant                                                                          |
| rs755838189 | intron_variant,genic_upstream_transcript_variant                                                                          |
| rs755838370 | intron_variant,genic_downstream_transcript_variant                                                                        |
| rs755852535 | intron_variant,genic_upstream_transcript_variant                                                                          |

|             |                                                                                                                           |
|-------------|---------------------------------------------------------------------------------------------------------------------------|
| rs755897024 | intron_variant                                                                                                            |
| rs755972463 | intron_variant,genic_upstream_transcript_variant                                                                          |
| rs756000510 | intron_variant,genic_upstream_transcript_variant                                                                          |
| rs756005576 | intron_variant,genic_downstream_transcript_variant,downstream_transcript_variant                                          |
| rs756036364 | intron_variant,genic_downstream_transcript_variant                                                                        |
| rs756042406 | intron_variant                                                                                                            |
| rs756043598 | intron_variant                                                                                                            |
| rs756086234 | 3_prime_UTR_variant,genic_downstream_transcript_variant,non_coding_transcript_variant                                     |
| rs756156682 | intron_variant,genic_downstream_transcript_variant                                                                        |
| rs756158949 | intron_variant,genic_downstream_transcript_variant                                                                        |
| rs756179880 | intron_variant,genic_upstream_transcript_variant                                                                          |
| rs756185039 | intron_variant,genic_upstream_transcript_variant                                                                          |
| rs756189116 | intron_variant,genic_upstream_transcript_variant                                                                          |
| rs756198003 | intron_variant,genic_upstream_transcript_variant                                                                          |
| rs756207703 | intron_variant                                                                                                            |
| rs756209410 | coding_sequence_variant,missense_variant,non_coding_transcript_variant                                                    |
| rs756225840 | intron_variant                                                                                                            |
| rs756253170 | intron_variant,genic_downstream_transcript_variant                                                                        |
| rs756277216 | intron_variant                                                                                                            |
| rs756318657 | intron_variant,genic_downstream_transcript_variant                                                                        |
| rs756364068 | intron_variant,genic_downstream_transcript_variant                                                                        |
| rs756396862 | intron_variant,genic_upstream_transcript_variant                                                                          |
| rs756403758 | intron_variant                                                                                                            |
| rs756436546 | intron_variant,genic_downstream_transcript_variant                                                                        |
| rs756440095 | intron_variant,genic_upstream_transcript_variant                                                                          |
| rs756484908 | intron_variant,genic_upstream_transcript_variant                                                                          |
| rs756536563 | intron_variant                                                                                                            |
| rs756538415 | intron_variant,genic_upstream_transcript_variant                                                                          |
| rs756554970 | intron_variant                                                                                                            |
| rs756600973 | intron_variant                                                                                                            |
| rs756603223 | intron_variant                                                                                                            |
| rs756610496 | intron_variant                                                                                                            |
| rs756703407 | intron_variant                                                                                                            |
| rs756703567 | intron_variant,genic_downstream_transcript_variant                                                                        |
| rs756758022 | intron_variant,genic_upstream_transcript_variant                                                                          |
| rs756777779 | intron_variant                                                                                                            |
| rs756828607 | intron_variant                                                                                                            |
| rs756856284 | missense_variant,genic_upstream_transcript_variant,intron_variant,non_coding_transcript_variant,coding_sequence_variant   |
| rs756911444 | genic_upstream_transcript_variant,synonymous_variant,intron_variant,non_coding_transcript_variant,coding_sequence_variant |
| rs756918159 | intron_variant                                                                                                            |
| rs756923140 | intron_variant,genic_upstream_transcript_variant                                                                          |
| rs756957004 | coding_sequence_variant,genic_downstream_transcript_variant,non_coding_transcript_variant,synonymous_variant              |
| rs756965131 | intron_variant,genic_downstream_transcript_variant                                                                        |
| rs756971766 | intron_variant,genic_upstream_transcript_variant,2KB_upstream_variant,upstream_transcript_variant                         |
| rs756986876 | intron_variant,genic_upstream_transcript_variant                                                                          |
| rs757001661 | intron_variant                                                                                                            |
| rs757006484 | intron_variant                                                                                                            |
| rs757022316 | intron_variant,genic_downstream_transcript_variant                                                                        |
| rs757100386 | intron_variant,genic_upstream_transcript_variant,2KB_upstream_variant,upstream_transcript_variant                         |
| rs757111476 | coding_sequence_variant,missense_variant,non_coding_transcript_variant                                                    |
| rs757166437 | splice_donor_variant                                                                                                      |
| rs757210861 | intron_variant                                                                                                            |
| rs757217266 | intron_variant,genic_upstream_transcript_variant                                                                          |
| rs757217661 | intron_variant,genic_upstream_transcript_variant                                                                          |
| rs757250888 | intron_variant,genic_upstream_transcript_variant                                                                          |
| rs757294942 | intron_variant                                                                                                            |
| rs757296777 | coding_sequence_variant,non_coding_transcript_variant,synonymous_variant                                                  |
| rs757307335 | intron_variant                                                                                                            |
| rs757319358 | intron_variant                                                                                                            |
| rs757333718 | intron_variant,genic_upstream_transcript_variant                                                                          |
| rs757365058 | intron_variant,genic_upstream_transcript_variant                                                                          |
| rs757405950 | intron_variant,genic_upstream_transcript_variant                                                                          |
| rs757413061 | intron_variant                                                                                                            |
| rs757424541 | intron_variant,genic_upstream_transcript_variant                                                                          |
| rs757448894 | intron_variant                                                                                                            |
| rs757455983 | intron_variant                                                                                                            |
| rs757520538 | intron_variant,genic_downstream_transcript_variant                                                                        |
| rs757521023 | 3_prime_UTR_variant,genic_downstream_transcript_variant,non_coding_transcript_variant                                     |
| rs757526105 | intron_variant,genic_upstream_transcript_variant                                                                          |
| rs757592643 | 3_prime_UTR_variant,genic_downstream_transcript_variant,non_coding_transcript_variant                                     |
| rs757614947 | intron_variant                                                                                                            |
| rs757665813 | intron_variant                                                                                                            |
| rs757722408 | intron_variant,genic_upstream_transcript_variant                                                                          |
| rs757740450 | intron_variant                                                                                                            |

|             |                                                                                                                         |
|-------------|-------------------------------------------------------------------------------------------------------------------------|
| rs757750209 | 3_prime_UTR_variant,genic_downstream_transcript_variant,non_coding_transcript_variant                                   |
| rs757753572 | intron_variant,genic_downstream_transcript_variant                                                                      |
| rs757759704 | coding_sequence_variant,missense_variant,non_coding_transcript_variant                                                  |
| rs757778158 | intron_variant                                                                                                          |
| rs757781542 | intron_variant                                                                                                          |
| rs757811101 | coding_sequence_variant,missense_variant,non_coding_transcript_variant                                                  |
| rs757837264 | intron_variant,genic_upstream_transcript_variant                                                                        |
| rs757839238 | intron_variant                                                                                                          |
| rs757867751 | intron_variant,genic_downstream_transcript_variant                                                                      |
| rs757883444 | intron_variant,genic_upstream_transcript_variant,2KB_upstream_variant,upstream_transcript_variant                       |
| rs757919874 | intron_variant                                                                                                          |
| rs757978409 | intron_variant,genic_upstream_transcript_variant                                                                        |
| rs758018541 | intron_variant,genic_downstream_transcript_variant                                                                      |
| rs758046215 | intron_variant,5_prime_UTR_variant                                                                                      |
| rs758048261 | intron_variant                                                                                                          |
| rs758065083 | intron_variant,genic_upstream_transcript_variant,2KB_upstream_variant,upstream_transcript_variant                       |
| rs758123151 | coding_sequence_variant,missense_variant,genic_downstream_transcript_variant,non_coding_transcript_variant              |
| rs758137419 | intron_variant,genic_upstream_transcript_variant                                                                        |
| rs758153966 | intron_variant                                                                                                          |
| rs758184735 | intron_variant                                                                                                          |
| rs758208761 | intron_variant,genic_upstream_transcript_variant,2KB_upstream_variant,upstream_transcript_variant                       |
| rs758209474 | intron_variant,genic_upstream_transcript_variant                                                                        |
| rs758230781 | intron_variant,genic_downstream_transcript_variant                                                                      |
| rs758236038 | intron_variant,genic_upstream_transcript_variant                                                                        |
| rs758242168 | intron_variant,genic_downstream_transcript_variant                                                                      |
| rs758246482 | intron_variant                                                                                                          |
| rs758298344 | intron_variant                                                                                                          |
| rs758299724 | coding_sequence_variant,missense_variant,non_coding_transcript_variant                                                  |
| rs758369474 | intron_variant,genic_upstream_transcript_variant,2KB_upstream_variant,upstream_transcript_variant                       |
| rs758381357 | intron_variant                                                                                                          |
| rs758477366 | intron_variant,genic_upstream_transcript_variant                                                                        |
| rs758499914 | intron_variant,genic_upstream_transcript_variant                                                                        |
| rs758511772 | intron_variant,genic_upstream_transcript_variant                                                                        |
| rs758565332 | coding_sequence_variant,missense_variant,non_coding_transcript_variant                                                  |
| rs758603017 | intron_variant,genic_upstream_transcript_variant                                                                        |
| rs758616831 | coding_sequence_variant,missense_variant,non_coding_transcript_variant                                                  |
| rs758691199 | intron_variant                                                                                                          |
| rs758706999 | intron_variant                                                                                                          |
| rs758711808 | intron_variant                                                                                                          |
| rs758717390 | genic_upstream_transcript_variant,intron_variant                                                                        |
| rs758765878 | genic_upstream_transcript_variant,intron_variant                                                                        |
| rs758810596 | genic_upstream_transcript_variant,intron_variant                                                                        |
| rs758831759 | genic_upstream_transcript_variant,intron_variant                                                                        |
| rs758862874 | genic_upstream_transcript_variant,intron_variant,non_coding_transcript_variant,coding_sequence_variant,missense_variant |
| rs758868205 | genic_upstream_transcript_variant,intron_variant,splice_acceptor_variant                                                |
| rs758889512 | genic_upstream_transcript_variant,intron_variant                                                                        |
| rs758892892 | intron_variant,genic_downstream_transcript_variant                                                                      |
| rs758900174 | intron_variant                                                                                                          |
| rs758902071 | non_coding_transcript_variant,genic_downstream_transcript_variant,synonymous_variant,coding_sequence_variant            |
| rs758912327 | genic_upstream_transcript_variant,intron_variant                                                                        |
| rs758949656 | non_coding_transcript_variant,genic_downstream_transcript_variant,3_prime_UTR_variant                                   |
| rs759006869 | genic_upstream_transcript_variant,intron_variant                                                                        |
| rs759020611 | intron_variant                                                                                                          |
| rs759034645 | genic_upstream_transcript_variant,intron_variant                                                                        |
| rs759050445 | intron_variant,genic_downstream_transcript_variant                                                                      |
| rs759074353 | genic_upstream_transcript_variant,intron_variant                                                                        |
| rs759146083 | intron_variant,genic_downstream_transcript_variant                                                                      |
| rs759151928 | intron_variant                                                                                                          |
| rs759196676 | genic_upstream_transcript_variant,intron_variant                                                                        |
| rs759224383 | genic_upstream_transcript_variant,intron_variant                                                                        |
| rs759248192 | intron_variant                                                                                                          |
| rs759259560 | intron_variant                                                                                                          |
| rs759326927 | genic_upstream_transcript_variant,intron_variant                                                                        |
| rs759372620 | intron_variant                                                                                                          |
| rs759415024 | genic_upstream_transcript_variant,intron_variant                                                                        |
| rs759429097 | intron_variant                                                                                                          |
| rs759467172 | intron_variant                                                                                                          |
| rs759492209 | intron_variant,genic_downstream_transcript_variant                                                                      |
| rs759512297 | non_coding_transcript_variant,genic_downstream_transcript_variant,3_prime_UTR_variant                                   |
| rs759577935 | genic_upstream_transcript_variant,intron_variant                                                                        |
| rs759578562 | genic_upstream_transcript_variant,intron_variant                                                                        |
| rs759580025 | intron_variant,genic_downstream_transcript_variant                                                                      |
| rs759592653 | intron_variant                                                                                                          |
| rs759601762 | intron_variant                                                                                                          |

|             |                                                                                                                                            |
|-------------|--------------------------------------------------------------------------------------------------------------------------------------------|
| rs759602956 | genic_upstream_transcript_variant,intron_variant,synonymous_variant,non_coding_transcript_variant,coding_sequence_variant                  |
| rs759603561 | intron_variant                                                                                                                             |
| rs759644071 | genic_upstream_transcript_variant,intron_variant                                                                                           |
| rs759653192 | non_coding_transcript_variant,genic_downstream_transcript_variant,3_prime_UTR_variant                                                      |
| rs759725554 | intron_variant,genic_downstream_transcript_variant                                                                                         |
| rs759726534 | intron_variant,genic_downstream_transcript_variant                                                                                         |
| rs759733340 | genic_upstream_transcript_variant,intron_variant                                                                                           |
| rs759814382 | intron_variant,genic_downstream_transcript_variant                                                                                         |
| rs759815968 | intron_variant                                                                                                                             |
| rs759816115 | intron_variant                                                                                                                             |
| rs759821959 | intron_variant                                                                                                                             |
| rs759849443 | intron_variant                                                                                                                             |
| rs759857869 | intron_variant                                                                                                                             |
| rs759884389 | intron_variant                                                                                                                             |
| rs759930796 | intron_variant                                                                                                                             |
| rs759960697 | intron_variant                                                                                                                             |
| rs759987500 | genic_upstream_transcript_variant,intron_variant                                                                                           |
| rs760008942 | genic_upstream_transcript_variant,intron_variant                                                                                           |
| rs760010863 | genic_upstream_transcript_variant,intron_variant                                                                                           |
| rs760013316 | intron_variant                                                                                                                             |
| rs760014990 | intron_variant,genic_downstream_transcript_variant                                                                                         |
| rs760040735 | genic_upstream_transcript_variant,intron_variant                                                                                           |
| rs760052842 | intron_variant                                                                                                                             |
| rs760091049 | genic_upstream_transcript_variant,intron_variant                                                                                           |
| rs760098507 | intron_variant                                                                                                                             |
| rs760098700 | intron_variant,genic_downstream_transcript_variant                                                                                         |
| rs760146587 | intron_variant                                                                                                                             |
| rs760153701 | non_coding_transcript_variant,genic_downstream_transcript_variant,coding_sequence_variant,missense_variant                                 |
| rs760191152 | genic_upstream_transcript_variant,intron_variant,upstream_transcript_variant,2KB_upstream_variant                                          |
| rs760195972 | intron_variant                                                                                                                             |
| rs760224921 | genic_upstream_transcript_variant,intron_variant,upstream_transcript_variant,2KB_upstream_variant                                          |
| rs760238138 | intron_variant,genic_downstream_transcript_variant                                                                                         |
| rs760253336 | genic_upstream_transcript_variant,intron_variant                                                                                           |
| rs760284924 | intron_variant,genic_downstream_transcript_variant                                                                                         |
| rs760339018 | non_coding_transcript_variant,genic_downstream_transcript_variant,coding_sequence_variant,missense_variant                                 |
| rs760350427 | intron_variant,genic_downstream_transcript_variant                                                                                         |
| rs760373751 | intron_variant                                                                                                                             |
| rs760375783 | genic_upstream_transcript_variant,intron_variant                                                                                           |
| rs760413666 | intron_variant                                                                                                                             |
| rs760519841 | genic_upstream_transcript_variant,intron_variant                                                                                           |
| rs760581237 | genic_upstream_transcript_variant,intron_variant                                                                                           |
| rs760581284 | genic_upstream_transcript_variant,intron_variant                                                                                           |
| rs760582864 | intron_variant                                                                                                                             |
| rs760609715 | non_coding_transcript_variant,synonymous_variant,coding_sequence_variant                                                                   |
| rs760617164 | intron_variant                                                                                                                             |
| rs760646861 | intron_variant                                                                                                                             |
| rs760663148 | intron_variant,coding_sequence_variant,missense_variant                                                                                    |
| rs760664725 | intron_variant                                                                                                                             |
| rs760706250 | genic_upstream_transcript_variant,intron_variant                                                                                           |
| rs760718962 | intron_variant,genic_downstream_transcript_variant                                                                                         |
| rs760727137 | genic_upstream_transcript_variant,intron_variant,synonymous_variant,non_coding_transcript_variant,coding_sequence_variant,missense_variant |
| rs760727499 | intron_variant,genic_downstream_transcript_variant                                                                                         |
| rs760728977 | intron_variant                                                                                                                             |
| rs760784337 | intron_variant                                                                                                                             |
| rs760833700 | intron_variant                                                                                                                             |
| rs760838791 | intron_variant                                                                                                                             |
| rs760843853 | intron_variant                                                                                                                             |
| rs760868842 | intron_variant                                                                                                                             |
| rs760898456 | genic_upstream_transcript_variant,intron_variant                                                                                           |
| rs760935013 | intron_variant,genic_downstream_transcript_variant                                                                                         |
| rs760943254 | intron_variant,genic_downstream_transcript_variant                                                                                         |
| rs760953555 | intron_variant                                                                                                                             |
| rs760960304 | intron_variant,genic_downstream_transcript_variant                                                                                         |
| rs760984193 | genic_upstream_transcript_variant,intron_variant,upstream_transcript_variant,2KB_upstream_variant                                          |
| rs761022373 | genic_upstream_transcript_variant,intron_variant                                                                                           |
| rs761043122 | 5_prime_UTR_variant,non_coding_transcript_variant,coding_sequence_variant,missense_variant                                                 |
| rs761045329 | genic_upstream_transcript_variant,intron_variant                                                                                           |
| rs761059407 | intron_variant,genic_downstream_transcript_variant                                                                                         |
| rs761076497 | intron_variant                                                                                                                             |
| rs761110329 | intron_variant                                                                                                                             |
| rs761114112 | intron_variant                                                                                                                             |
| rs761132934 | intron_variant                                                                                                                             |
| rs761141143 | genic_upstream_transcript_variant,intron_variant                                                                                           |
| rs761144580 | intron_variant                                                                                                                             |

|             |                                                                                                                         |
|-------------|-------------------------------------------------------------------------------------------------------------------------|
| rs761144864 | genic_upstream_transcript_variant,intron_variant                                                                        |
| rs761162957 | non_coding_transcript_variant,genic_downstream_transcript_variant,synonymous_variant,coding_sequence_variant            |
| rs761164322 | genic_upstream_transcript_variant,intron_variant                                                                        |
| rs761218900 | intron_variant,genic_downstream_transcript_variant                                                                      |
| rs761227260 | intron_variant                                                                                                          |
| rs761237537 | non_coding_transcript_variant,genic_downstream_transcript_variant,synonymous_variant,coding_sequence_variant            |
| rs761256009 | intron_variant                                                                                                          |
| rs761295320 | genic_upstream_transcript_variant,intron_variant                                                                        |
| rs761305394 | intron_variant,frameshift_variant,coding_sequence_variant                                                               |
| rs761323026 | genic_upstream_transcript_variant,intron_variant                                                                        |
| rs761336829 | intron_variant                                                                                                          |
| rs761346772 | genic_upstream_transcript_variant,intron_variant                                                                        |
| rs761354855 | genic_upstream_transcript_variant,intron_variant,non_coding_transcript_variant,coding_sequence_variant,missense_variant |
| rs761366196 | intron_variant,genic_downstream_transcript_variant                                                                      |
| rs761404310 | intron_variant                                                                                                          |
| rs761419338 | intron_variant,genic_downstream_transcript_variant                                                                      |
| rs761529350 | intron_variant                                                                                                          |
| rs761551984 | genic_upstream_transcript_variant,intron_variant                                                                        |
| rs761558546 | genic_upstream_transcript_variant,intron_variant                                                                        |
| rs761679634 | genic_upstream_transcript_variant,intron_variant                                                                        |
| rs761725546 | genic_upstream_transcript_variant,intron_variant                                                                        |
| rs761727097 | non_coding_transcript_variant,coding_sequence_variant,missense_variant                                                  |
| rs761753816 | genic_upstream_transcript_variant,intron_variant                                                                        |
| rs761807652 | intron_variant                                                                                                          |
| rs761812322 | intron_variant                                                                                                          |
| rs761830410 | intron_variant,genic_downstream_transcript_variant                                                                      |
| rs761841081 | intron_variant                                                                                                          |
| rs761858361 | intron_variant                                                                                                          |
| rs761863145 | intron_variant,genic_downstream_transcript_variant                                                                      |
| rs761863605 | intron_variant                                                                                                          |
| rs761865581 | genic_upstream_transcript_variant,intron_variant                                                                        |
| rs761877064 | intron_variant                                                                                                          |
| rs761884841 | intron_variant,genic_downstream_transcript_variant                                                                      |
| rs761916998 | genic_upstream_transcript_variant,intron_variant                                                                        |
| rs761951558 | intron_variant                                                                                                          |
| rs762004763 | non_coding_transcript_variant,coding_sequence_variant,missense_variant                                                  |
| rs762010930 | intron_variant,genic_downstream_transcript_variant                                                                      |
| rs762033653 | genic_upstream_transcript_variant,intron_variant                                                                        |
| rs762035743 | genic_upstream_transcript_variant,intron_variant                                                                        |
| rs762037673 | intron_variant                                                                                                          |
| rs762057806 | intron_variant                                                                                                          |
| rs762059386 | genic_upstream_transcript_variant,intron_variant,non_coding_transcript_variant,coding_sequence_variant,missense_variant |
| rs762069973 | intron_variant                                                                                                          |
| rs762101350 | intron_variant,genic_downstream_transcript_variant                                                                      |
| rs762147603 | intron_variant,genic_downstream_transcript_variant                                                                      |
| rs762160906 | genic_upstream_transcript_variant,intron_variant                                                                        |
| rs762167152 | genic_upstream_transcript_variant,intron_variant                                                                        |
| rs762170557 | intron_variant,genic_downstream_transcript_variant                                                                      |
| rs762175278 | intron_variant                                                                                                          |
| rs762202581 | intron_variant                                                                                                          |
| rs762218595 | non_coding_transcript_variant,genic_downstream_transcript_variant,synonymous_variant,coding_sequence_variant            |
| rs762239246 | genic_upstream_transcript_variant,intron_variant                                                                        |
| rs762253815 | genic_upstream_transcript_variant,intron_variant,non_coding_transcript_variant,coding_sequence_variant,missense_variant |
| rs762256425 | intron_variant                                                                                                          |
| rs762270997 | intron_variant                                                                                                          |
| rs762317059 | genic_upstream_transcript_variant,intron_variant,upstream_transcript_variant,2KB_upstream_variant                       |
| rs762389147 | non_coding_transcript_variant,coding_sequence_variant,missense_variant                                                  |
| rs762397963 | intron_variant,genic_downstream_transcript_variant                                                                      |
| rs762434656 | genic_upstream_transcript_variant,intron_variant                                                                        |
| rs762447442 | genic_upstream_transcript_variant,intron_variant                                                                        |
| rs762463522 | genic_upstream_transcript_variant,intron_variant                                                                        |
| rs762464302 | intron_variant                                                                                                          |
| rs762466945 | intron_variant,genic_downstream_transcript_variant                                                                      |
| rs762468061 | intron_variant                                                                                                          |
| rs762487154 | intron_variant                                                                                                          |
| rs762496200 | intron_variant,genic_downstream_transcript_variant                                                                      |
| rs762511653 | genic_upstream_transcript_variant,intron_variant                                                                        |
| rs762514890 | intron_variant                                                                                                          |
| rs762538423 | intron_variant                                                                                                          |
| rs762545251 | intron_variant                                                                                                          |
| rs762559626 | intron_variant                                                                                                          |
| rs762590681 | intron_variant                                                                                                          |
| rs762596260 | intron_variant,genic_downstream_transcript_variant                                                                      |
| rs762601307 | intron_variant,genic_downstream_transcript_variant                                                                      |

|             |                                                                                                                         |
|-------------|-------------------------------------------------------------------------------------------------------------------------|
| rs762601535 | intron_variant                                                                                                          |
| rs762607082 | genic_upstream_transcript_variant,intron_variant                                                                        |
| rs762633614 | intron_variant,genic_downstream_transcript_variant,downstream_transcript_variant                                        |
| rs762649571 | genic_upstream_transcript_variant,intron_variant                                                                        |
| rs762679588 | intron_variant                                                                                                          |
| rs762806877 | intron_variant                                                                                                          |
| rs762818113 | genic_upstream_transcript_variant,intron_variant                                                                        |
| rs762883310 | genic_upstream_transcript_variant,intron_variant                                                                        |
| rs762895764 | intron_variant,genic_downstream_transcript_variant                                                                      |
| rs762908812 | genic_upstream_transcript_variant,intron_variant,upstream_transcript_variant,2KB_upstream_variant                       |
| rs762916873 | intron_variant,genic_downstream_transcript_variant                                                                      |
| rs762940258 | genic_upstream_transcript_variant,intron_variant                                                                        |
| rs762988090 | genic_upstream_transcript_variant,intron_variant                                                                        |
| rs762991378 | genic_upstream_transcript_variant,intron_variant                                                                        |
| rs762997935 | genic_upstream_transcript_variant,intron_variant                                                                        |
| rs763003602 | intron_variant                                                                                                          |
| rs763045980 | intron_variant                                                                                                          |
| rs763047195 | intron_variant                                                                                                          |
| rs763200862 | non_coding_transcript_variant,genic_downstream_transcript_variant,frameshift_variant,coding_sequence_variant            |
| rs763220648 | intron_variant                                                                                                          |
| rs763228563 | genic_upstream_transcript_variant,intron_variant,upstream_transcript_variant,2KB_upstream_variant                       |
| rs763229134 | intron_variant                                                                                                          |
| rs763250326 | genic_upstream_transcript_variant,intron_variant                                                                        |
| rs763254967 | intron_variant                                                                                                          |
| rs763290694 | intron_variant,genic_downstream_transcript_variant                                                                      |
| rs763336926 | intron_variant,genic_downstream_transcript_variant                                                                      |
| rs763349755 | intron_variant                                                                                                          |
| rs763365486 | intron_variant,genic_downstream_transcript_variant                                                                      |
| rs763371973 | genic_upstream_transcript_variant,intron_variant                                                                        |
| rs763388965 | intron_variant                                                                                                          |
| rs763442680 | intron_variant                                                                                                          |
| rs763481809 | non_coding_transcript_variant,synonymous_variant,coding_sequence_variant                                                |
| rs763503217 | intron_variant                                                                                                          |
| rs763521162 | intron_variant                                                                                                          |
| rs763532683 | intron_variant                                                                                                          |
| rs763566579 | intron_variant                                                                                                          |
| rs763567278 | genic_upstream_transcript_variant,intron_variant,upstream_transcript_variant,2KB_upstream_variant                       |
| rs763587498 | intron_variant                                                                                                          |
| rs763602886 | genic_upstream_transcript_variant,intron_variant                                                                        |
| rs763613982 | genic_upstream_transcript_variant,intron_variant                                                                        |
| rs763750999 | intron_variant                                                                                                          |
| rs763766124 | intron_variant,genic_downstream_transcript_variant                                                                      |
| rs763805848 | genic_upstream_transcript_variant,intron_variant                                                                        |
| rs763809275 | intron_variant                                                                                                          |
| rs763829971 | intron_variant                                                                                                          |
| rs763839257 | intron_variant                                                                                                          |
| rs763894522 | genic_upstream_transcript_variant,intron_variant,upstream_transcript_variant,2KB_upstream_variant                       |
| rs763901969 | intron_variant                                                                                                          |
| rs763921739 | intron_variant                                                                                                          |
| rs763937238 | genic_upstream_transcript_variant,intron_variant                                                                        |
| rs763982333 | genic_upstream_transcript_variant,intron_variant                                                                        |
| rs764001968 | genic_upstream_transcript_variant,intron_variant                                                                        |
| rs764098545 | intron_variant,genic_downstream_transcript_variant                                                                      |
| rs764105241 | genic_upstream_transcript_variant,intron_variant                                                                        |
| rs764114444 | genic_upstream_transcript_variant,intron_variant                                                                        |
| rs764173758 | intron_variant                                                                                                          |
| rs764197623 | intron_variant                                                                                                          |
| rs764206203 | intron_variant,genic_downstream_transcript_variant                                                                      |
| rs764250962 | genic_upstream_transcript_variant,intron_variant                                                                        |
| rs764255635 | intron_variant,genic_downstream_transcript_variant                                                                      |
| rs764256174 | non_coding_transcript_variant,genic_downstream_transcript_variant,3_prime_UTR_variant                                   |
| rs764271159 | intron_variant,genic_downstream_transcript_variant                                                                      |
| rs764297742 | intron_variant                                                                                                          |
| rs764298326 | intron_variant                                                                                                          |
| rs764327245 | intron_variant,genic_downstream_transcript_variant                                                                      |
| rs764341826 | genic_upstream_transcript_variant,intron_variant                                                                        |
| rs764368218 | non_coding_transcript_variant,genic_downstream_transcript_variant,coding_sequence_variant,missense_variant              |
| rs764387480 | intron_variant                                                                                                          |
| rs764400972 | intron_variant                                                                                                          |
| rs764421234 | intron_variant,genic_downstream_transcript_variant,downstream_transcript_variant                                        |
| rs764450961 | genic_upstream_transcript_variant,intron_variant                                                                        |
| rs764455004 | genic_upstream_transcript_variant,intron_variant,non_coding_transcript_variant,coding_sequence_variant,missense_variant |
| rs764479450 | intron_variant                                                                                                          |
| rs764487179 | genic_upstream_transcript_variant,intron_variant                                                                        |

|             |                                                                                                                               |
|-------------|-------------------------------------------------------------------------------------------------------------------------------|
| rs764549271 | non_coding_transcript_variant,genic_downstream_transcript_variant,coding_sequence_variant,missense_variant                    |
| rs764560452 | intron_variant                                                                                                                |
| rs764564850 | genic_upstream_transcript_variant,intron_variant                                                                              |
| rs764594692 | genic_upstream_transcript_variant,intron_variant                                                                              |
| rs764595037 | intron_variant,genic_downstream_transcript_variant                                                                            |
| rs764613944 | genic_upstream_transcript_variant,intron_variant                                                                              |
| rs764653966 | genic_upstream_transcript_variant,intron_variant                                                                              |
| rs764655154 | genic_upstream_transcript_variant,intron_variant                                                                              |
| rs764662911 | intron_variant                                                                                                                |
| rs764680429 | genic_upstream_transcript_variant,intron_variant                                                                              |
| rs764682992 | intron_variant                                                                                                                |
| rs764687022 | genic_upstream_transcript_variant,intron_variant                                                                              |
| rs764706563 | intron_variant,genic_downstream_transcript_variant                                                                            |
| rs764715522 | genic_upstream_transcript_variant,intron_variant                                                                              |
| rs764716245 | intron_variant                                                                                                                |
| rs764718816 | intron_variant                                                                                                                |
| rs764720791 | intron_variant                                                                                                                |
| rs764729191 | genic_upstream_transcript_variant,intron_variant                                                                              |
| rs764750373 | intron_variant                                                                                                                |
| rs764811491 | genic_upstream_transcript_variant,intron_variant,inframe_deletion,non_coding_transcript_variant,coding_sequence_variant       |
| rs764814223 | non_coding_transcript_variant,genic_downstream_transcript_variant,coding_sequence_variant,missense_variant                    |
| rs764856420 | intron_variant                                                                                                                |
| rs764875423 | non_coding_transcript_variant,genic_downstream_transcript_variant,coding_sequence_variant,missense_variant                    |
| rs764877929 | intron_variant                                                                                                                |
| rs764901343 | intron_variant                                                                                                                |
| rs764931963 | intron_variant                                                                                                                |
| rs765004631 | intron_variant,genic_downstream_transcript_variant                                                                            |
| rs765045451 | genic_upstream_transcript_variant,intron_variant                                                                              |
| rs765057097 | genic_upstream_transcript_variant,intron_variant                                                                              |
| rs765058024 | non_coding_transcript_variant,genic_downstream_transcript_variant,3_prime_UTR_variant                                         |
| rs765082989 | genic_upstream_transcript_variant,intron_variant                                                                              |
| rs765122275 | intron_variant,genic_downstream_transcript_variant                                                                            |
| rs765133207 | genic_upstream_transcript_variant,intron_variant                                                                              |
| rs765135279 | genic_upstream_transcript_variant,intron_variant                                                                              |
| rs765135956 | intron_variant                                                                                                                |
| rs765246117 | genic_upstream_transcript_variant,intron_variant,non_coding_transcript_variant,coding_sequence_variant,missense_variant       |
| rs765259685 | intron_variant                                                                                                                |
| rs765292036 | genic_upstream_transcript_variant,intron_variant                                                                              |
| rs765311042 | non_coding_transcript_variant,coding_sequence_variant,missense_variant                                                        |
| rs765318458 | genic_upstream_transcript_variant,intron_variant                                                                              |
| rs765346543 | intron_variant                                                                                                                |
| rs765356988 | intron_variant                                                                                                                |
| rs765358638 | intron_variant                                                                                                                |
| rs765362467 | genic_upstream_transcript_variant,intron_variant                                                                              |
| rs765371714 | intron_variant,genic_downstream_transcript_variant,downstream_transcript_variant                                              |
| rs765396951 | intron_variant,genic_downstream_transcript_variant                                                                            |
| rs765413500 | intron_variant                                                                                                                |
| rs765423511 | genic_upstream_transcript_variant,intron_variant                                                                              |
| rs765451597 | intron_variant,genic_downstream_transcript_variant                                                                            |
| rs765470362 | intron_variant,genic_downstream_transcript_variant                                                                            |
| rs765480608 | intron_variant                                                                                                                |
| rs765501240 | intron_variant                                                                                                                |
| rs765512275 | intron_variant,genic_downstream_transcript_variant                                                                            |
| rs765518753 | intron_variant                                                                                                                |
| rs765537944 | genic_upstream_transcript_variant,intron_variant                                                                              |
| rs765540755 | intron_variant                                                                                                                |
| rs765604809 | genic_upstream_transcript_variant,intron_variant,upstream_transcript_variant,2KB_upstream_variant                             |
| rs765643487 | intron_variant                                                                                                                |
| rs765646981 | intron_variant                                                                                                                |
| rs765659351 | intron_variant,genic_downstream_transcript_variant                                                                            |
| rs765690911 | intron_variant,genic_downstream_transcript_variant                                                                            |
| rs765711111 | intron_variant                                                                                                                |
| rs765748859 | genic_upstream_transcript_variant,intron_variant                                                                              |
| rs765749466 | intron_variant,genic_downstream_transcript_variant                                                                            |
| rs765771575 | synonymous_variant,non_coding_transcript_variant,genic_downstream_transcript_variant,coding_sequence_variant,missense_variant |
| rs765880662 | genic_upstream_transcript_variant,intron_variant                                                                              |
| rs765971182 | intron_variant                                                                                                                |
| rs765976081 | intron_variant,genic_downstream_transcript_variant                                                                            |
| rs766024538 | intron_variant,genic_downstream_transcript_variant                                                                            |
| rs766068826 | genic_upstream_transcript_variant,intron_variant                                                                              |
| rs766127293 | intron_variant                                                                                                                |
| rs766136369 | non_coding_transcript_variant,genic_downstream_transcript_variant,synonymous_variant,coding_sequence_variant                  |
| rs766141870 | intron_variant                                                                                                                |
| rs766161277 | genic_upstream_transcript_variant,intron_variant,upstream_transcript_variant,2KB_upstream_variant                             |

|             |                                                                                                                               |
|-------------|-------------------------------------------------------------------------------------------------------------------------------|
| rs766220619 | intron_variant                                                                                                                |
| rs766228630 | intron_variant,genic_downstream_transcript_variant                                                                            |
| rs766388196 | intron_variant                                                                                                                |
| rs766399523 | intron_variant                                                                                                                |
| rs766405300 | intron_variant                                                                                                                |
| rs766452749 | intron_variant                                                                                                                |
| rs766503170 | genic_upstream_transcript_variant,intron_variant                                                                              |
| rs766558855 | intron_variant                                                                                                                |
| rs766566436 | intron_variant                                                                                                                |
| rs766574369 | genic_upstream_transcript_variant,intron_variant                                                                              |
| rs766611865 | intron_variant                                                                                                                |
| rs766626042 | genic_upstream_transcript_variant,intron_variant                                                                              |
| rs766639008 | intron_variant,genic_downstream_transcript_variant                                                                            |
| rs766655052 | genic_upstream_transcript_variant,intron_variant                                                                              |
| rs766678471 | intron_variant                                                                                                                |
| rs766696956 | intron_variant,genic_downstream_transcript_variant                                                                            |
| rs766722248 | intron_variant                                                                                                                |
| rs766797459 | intron_variant                                                                                                                |
| rs766798203 | intron_variant,genic_downstream_transcript_variant                                                                            |
| rs766802875 | genic_upstream_transcript_variant,intron_variant                                                                              |
| rs766815155 | genic_upstream_transcript_variant,intron_variant,non_coding_transcript_variant,coding_sequence_variant,missense_variant       |
| rs766835086 | intron_variant                                                                                                                |
| rs766849054 | genic_upstream_transcript_variant,intron_variant                                                                              |
| rs766865557 | stop_gained,synonymous_variant,non_coding_transcript_variant,genic_downstream_transcript_variant,coding_sequence_variant      |
| rs766874293 | genic_upstream_transcript_variant,intron_variant,non_coding_transcript_variant,coding_sequence_variant,missense_variant       |
| rs766890763 | intron_variant                                                                                                                |
| rs766901114 | genic_upstream_transcript_variant,intron_variant,non_coding_transcript_variant                                                |
| rs766923199 | intron_variant                                                                                                                |
| rs766944441 | genic_upstream_transcript_variant,intron_variant,non_coding_transcript_variant,coding_sequence_variant,missense_variant       |
| rs766944509 | intron_variant                                                                                                                |
| rs766977461 | genic_upstream_transcript_variant,intron_variant                                                                              |
| rs766983799 | intron_variant                                                                                                                |
| rs767033171 | intron_variant                                                                                                                |
| rs767063578 | intron_variant,genic_downstream_transcript_variant                                                                            |
| rs767126190 | genic_upstream_transcript_variant,intron_variant                                                                              |
| rs767177456 | intron_variant                                                                                                                |
| rs767181465 | intron_variant,genic_downstream_transcript_variant                                                                            |
| rs767200663 | intron_variant,genic_downstream_transcript_variant                                                                            |
| rs767232472 | non_coding_transcript_variant,coding_sequence_variant,missense_variant                                                        |
| rs767250103 | genic_upstream_transcript_variant,intron_variant                                                                              |
| rs767256435 | intron_variant,genic_downstream_transcript_variant                                                                            |
| rs767267441 | synonymous_variant,non_coding_transcript_variant,genic_downstream_transcript_variant,coding_sequence_variant,missense_variant |
| rs767290443 | intron_variant,genic_downstream_transcript_variant                                                                            |
| rs767305539 | intron_variant                                                                                                                |
| rs767348234 | intron_variant,genic_downstream_transcript_variant                                                                            |
| rs767357051 | intron_variant,genic_downstream_transcript_variant,downstream_transcript_variant                                              |
| rs767362061 | genic_upstream_transcript_variant,intron_variant                                                                              |
| rs767375583 | genic_upstream_transcript_variant,intron_variant,synonymous_variant,non_coding_transcript_variant,coding_sequence_variant     |
| rs767406683 | intron_variant                                                                                                                |
| rs767442805 | intron_variant                                                                                                                |
| rs767454912 | genic_upstream_transcript_variant,intron_variant                                                                              |
| rs767491349 | intron_variant,genic_downstream_transcript_variant                                                                            |
| rs767527057 | genic_upstream_transcript_variant,intron_variant                                                                              |
| rs767537903 | intron_variant                                                                                                                |
| rs767585305 | genic_upstream_transcript_variant,intron_variant                                                                              |
| rs767585693 | intron_variant,genic_downstream_transcript_variant                                                                            |
| rs767593124 | genic_upstream_transcript_variant,intron_variant                                                                              |
| rs767636605 | intron_variant                                                                                                                |
| rs767654490 | intron_variant                                                                                                                |
| rs767679159 | genic_downstream_transcript_variant,intron_variant                                                                            |
| rs767687478 | genic_downstream_transcript_variant,non_coding_transcript_variant,missense_variant,coding_sequence_variant                    |
| rs767710588 | intron_variant                                                                                                                |
| rs767712825 | genic_upstream_transcript_variant,intron_variant                                                                              |
| rs767719555 | genic_downstream_transcript_variant,intron_variant                                                                            |
| rs767720971 | genic_downstream_transcript_variant,intron_variant                                                                            |
| rs767728710 | genic_downstream_transcript_variant,intron_variant                                                                            |
| rs767736065 | genic_downstream_transcript_variant,non_coding_transcript_variant,missense_variant,coding_sequence_variant                    |
| rs767737226 | genic_downstream_transcript_variant,intron_variant                                                                            |
| rs767770443 | missense_variant,non_coding_transcript_variant,coding_sequence_variant                                                        |
| rs767781666 | genic_downstream_transcript_variant,intron_variant                                                                            |
| rs767803237 | intron_variant                                                                                                                |
| rs767810987 | genic_downstream_transcript_variant,intron_variant                                                                            |
| rs767816035 | genic_upstream_transcript_variant,intron_variant                                                                              |
| rs767825474 | intron_variant                                                                                                                |

|             |                                                                                                              |
|-------------|--------------------------------------------------------------------------------------------------------------|
| rs767931554 | genic_downstream_transcript_variant,non_coding_transcript_variant,missense_variant,coding_sequence_variant   |
| rs767943914 | 2KB_upstream_variant,upstream_transcript_variant,genic_upstream_transcript_variant,intron_variant            |
| rs768000278 | genic_upstream_transcript_variant,intron_variant                                                             |
| rs768039929 | intron_variant                                                                                               |
| rs768053811 | intron_variant                                                                                               |
| rs768074029 | intron_variant                                                                                               |
| rs768095750 | intron_variant                                                                                               |
| rs768133322 | intron_variant                                                                                               |
| rs768140276 | intron_variant                                                                                               |
| rs768149852 | synonymous_variant,non_coding_transcript_variant,coding_sequence_variant                                     |
| rs768164011 | intron_variant                                                                                               |
| rs768186336 | genic_upstream_transcript_variant,intron_variant                                                             |
| rs768207662 | genic_upstream_transcript_variant,intron_variant                                                             |
| rs768237016 | 2KB_upstream_variant,upstream_transcript_variant,genic_upstream_transcript_variant,intron_variant            |
| rs768247839 | genic_upstream_transcript_variant,intron_variant                                                             |
| rs768262313 | intron_variant                                                                                               |
| rs768265505 | genic_upstream_transcript_variant,intron_variant                                                             |
| rs768279546 | intron_variant                                                                                               |
| rs768282705 | genic_downstream_transcript_variant,intron_variant                                                           |
| rs768302930 | genic_upstream_transcript_variant,intron_variant                                                             |
| rs768338757 | genic_downstream_transcript_variant,intron_variant                                                           |
| rs768342842 | genic_upstream_transcript_variant,intron_variant                                                             |
| rs768392752 | genic_downstream_transcript_variant,intron_variant                                                           |
| rs768401013 | genic_upstream_transcript_variant,intron_variant                                                             |
| rs768416838 | genic_upstream_transcript_variant,intron_variant                                                             |
| rs768452050 | genic_downstream_transcript_variant,non_coding_transcript_variant,3_prime_UTR_variant                        |
| rs768452749 | genic_upstream_transcript_variant,intron_variant                                                             |
| rs768478510 | genic_upstream_transcript_variant,intron_variant                                                             |
| rs768481976 | genic_upstream_transcript_variant,intron_variant                                                             |
| rs768510364 | intron_variant                                                                                               |
| rs768514788 | intron_variant                                                                                               |
| rs768521017 | genic_downstream_transcript_variant,synonymous_variant,non_coding_transcript_variant,coding_sequence_variant |
| rs768536142 | 2KB_upstream_variant,upstream_transcript_variant,genic_upstream_transcript_variant,intron_variant            |
| rs768567386 | intron_variant                                                                                               |
| rs768568721 | intron_variant                                                                                               |
| rs768619871 | intron_variant                                                                                               |
| rs768631933 | intron_variant                                                                                               |
| rs768638354 | intron_variant                                                                                               |
| rs768648038 | genic_upstream_transcript_variant,intron_variant                                                             |
| rs768666216 | genic_downstream_transcript_variant,intron_variant                                                           |
| rs768666703 | genic_downstream_transcript_variant,intron_variant                                                           |
| rs768681640 | intron_variant                                                                                               |
| rs768705021 | intron_variant                                                                                               |
| rs768719446 | genic_downstream_transcript_variant,intron_variant                                                           |
| rs768723704 | genic_upstream_transcript_variant,intron_variant                                                             |
| rs768785167 | genic_downstream_transcript_variant,intron_variant                                                           |
| rs768789322 | genic_downstream_transcript_variant,intron_variant                                                           |
| rs768789594 | intron_variant                                                                                               |
| rs768791457 | intron_variant                                                                                               |
| rs768842447 | intron_variant                                                                                               |
| rs768845843 | genic_upstream_transcript_variant,intron_variant                                                             |
| rs768873133 | genic_downstream_transcript_variant,intron_variant                                                           |
| rs768875023 | genic_downstream_transcript_variant,intron_variant                                                           |
| rs768957279 | intron_variant                                                                                               |
| rs768986107 | genic_downstream_transcript_variant,intron_variant                                                           |
| rs768994279 | intron_variant                                                                                               |
| rs769023801 | intron_variant                                                                                               |
| rs769062753 | genic_upstream_transcript_variant,intron_variant                                                             |
| rs769077231 | intron_variant                                                                                               |
| rs769080501 | genic_downstream_transcript_variant,intron_variant                                                           |
| rs769085111 | genic_downstream_transcript_variant,intron_variant                                                           |
| rs769149301 | intron_variant                                                                                               |
| rs769193197 | intron_variant                                                                                               |
| rs769240915 | genic_downstream_transcript_variant,intron_variant                                                           |
| rs769298832 | intron_variant                                                                                               |
| rs769300115 | genic_upstream_transcript_variant,intron_variant                                                             |
| rs769320137 | intron_variant                                                                                               |
| rs769349525 | genic_downstream_transcript_variant,intron_variant                                                           |
| rs769366576 | intron_variant                                                                                               |
| rs769390271 | genic_downstream_transcript_variant,non_coding_transcript_variant,3_prime_UTR_variant                        |
| rs769397942 | genic_upstream_transcript_variant,intron_variant                                                             |
| rs769409893 | intron_variant                                                                                               |
| rs769410849 | genic_downstream_transcript_variant,intron_variant                                                           |
| rs769412597 | genic_upstream_transcript_variant,intron_variant                                                             |

|             |                                                                                                                           |
|-------------|---------------------------------------------------------------------------------------------------------------------------|
| rs769436388 | intron_variant                                                                                                            |
| rs769441540 | genic_downstream_transcript_variant,intron_variant                                                                        |
| rs769454967 | genic_upstream_transcript_variant,intron_variant                                                                          |
| rs769474791 | genic_downstream_transcript_variant,synonymous_variant,non_coding_transcript_variant,coding_sequence_variant              |
| rs769507421 | non_coding_transcript_variant,genic_upstream_transcript_variant,coding_sequence_variant,synonymous_variant,intron_variant |
| rs769523896 | genic_upstream_transcript_variant,intron_variant                                                                          |
| rs769529815 | intron_variant                                                                                                            |
| rs769552513 | intron_variant                                                                                                            |
| rs769559836 | intron_variant                                                                                                            |
| rs769585920 | intron_variant                                                                                                            |
| rs769590991 | genic_upstream_transcript_variant,intron_variant                                                                          |
| rs769635709 | genic_upstream_transcript_variant,intron_variant                                                                          |
| rs769642577 | intron_variant                                                                                                            |
| rs769649681 | missense_variant,non_coding_transcript_variant,coding_sequence_variant                                                    |
| rs769653743 | intron_variant                                                                                                            |
| rs769696690 | genic_upstream_transcript_variant,intron_variant                                                                          |
| rs769706345 | intron_variant                                                                                                            |
| rs769721494 | genic_downstream_transcript_variant,non_coding_transcript_variant,missense_variant,coding_sequence_variant                |
| rs769757694 | synonymous_variant,non_coding_transcript_variant,coding_sequence_variant                                                  |
| rs769773230 | intron_variant                                                                                                            |
| rs769776433 | genic_upstream_transcript_variant,intron_variant                                                                          |
| rs769799488 | intron_variant                                                                                                            |
| rs769808985 | genic_downstream_transcript_variant,intron_variant                                                                        |
| rs769814035 | genic_downstream_transcript_variant,intron_variant                                                                        |
| rs769827488 | genic_downstream_transcript_variant,intron_variant                                                                        |
| rs769830885 | genic_downstream_transcript_variant,intron_variant                                                                        |
| rs769859867 | intron_variant                                                                                                            |
| rs769881952 | genic_downstream_transcript_variant,intron_variant                                                                        |
| rs769931527 | genic_upstream_transcript_variant,intron_variant                                                                          |
| rs769988668 | genic_upstream_transcript_variant,intron_variant                                                                          |
| rs769993835 | genic_upstream_transcript_variant,intron_variant                                                                          |
| rs770022379 | genic_upstream_transcript_variant,intron_variant                                                                          |
| rs770025886 | genic_upstream_transcript_variant,intron_variant                                                                          |
| rs770028047 | intron_variant                                                                                                            |
| rs770065936 | genic_downstream_transcript_variant,synonymous_variant,non_coding_transcript_variant,coding_sequence_variant              |
| rs770127842 | intron_variant                                                                                                            |
| rs770136314 | intron_variant                                                                                                            |
| rs770136415 | intron_variant                                                                                                            |
| rs770139854 | intron_variant                                                                                                            |
| rs770140466 | intron_variant                                                                                                            |
| rs770168163 | genic_downstream_transcript_variant,intron_variant                                                                        |
| rs770193543 | intron_variant                                                                                                            |
| rs770215323 | genic_upstream_transcript_variant,intron_variant                                                                          |
| rs770226367 | intron_variant                                                                                                            |
| rs770235320 | intron_variant                                                                                                            |
| rs770244862 | intron_variant                                                                                                            |
| rs770248442 | synonymous_variant,intron_variant,coding_sequence_variant                                                                 |
| rs770257200 | intron_variant                                                                                                            |
| rs770262391 | genic_downstream_transcript_variant,intron_variant                                                                        |
| rs770292593 | genic_upstream_transcript_variant,intron_variant                                                                          |
| rs770343484 | genic_upstream_transcript_variant,intron_variant                                                                          |
| rs770384154 | synonymous_variant,non_coding_transcript_variant,coding_sequence_variant                                                  |
| rs770445407 | genic_downstream_transcript_variant,intron_variant                                                                        |
| rs770486997 | intron_variant                                                                                                            |
| rs770492395 | intron_variant                                                                                                            |
| rs770528254 | non_coding_transcript_variant,genic_upstream_transcript_variant,coding_sequence_variant,missense_variant,intron_variant   |
| rs770538411 | genic_downstream_transcript_variant,intron_variant                                                                        |
| rs770545490 | genic_downstream_transcript_variant,intron_variant                                                                        |
| rs770547332 | genic_upstream_transcript_variant,intron_variant                                                                          |
| rs770562344 | intron_variant                                                                                                            |
| rs770598900 | genic_downstream_transcript_variant,intron_variant                                                                        |
| rs770600770 | intron_variant                                                                                                            |
| rs770600906 | intron_variant                                                                                                            |
| rs770648346 | genic_upstream_transcript_variant,intron_variant                                                                          |
| rs770687297 | genic_downstream_transcript_variant,intron_variant                                                                        |
| rs770726789 | intron_variant                                                                                                            |
| rs770782239 | intron_variant                                                                                                            |
| rs770811693 | 3_prime_UTR_variant,intron_variant                                                                                        |
| rs770812567 | intron_variant                                                                                                            |
| rs770827456 | intron_variant                                                                                                            |
| rs770829642 | genic_downstream_transcript_variant,intron_variant                                                                        |
| rs770848331 | intron_variant                                                                                                            |
| rs770869284 | genic_downstream_transcript_variant,intron_variant                                                                        |
| rs770877257 | genic_upstream_transcript_variant,intron_variant                                                                          |

|             |                                                                                                                         |
|-------------|-------------------------------------------------------------------------------------------------------------------------|
| rs770883074 | genic_upstream_transcript_variant,intron_variant                                                                        |
| rs770944275 | intron_variant                                                                                                          |
| rs770981650 | genic_downstream_transcript_variant,intron_variant                                                                      |
| rs771010969 | genic_upstream_transcript_variant,intron_variant                                                                        |
| rs771092101 | intron_variant                                                                                                          |
| rs771093041 | genic_upstream_transcript_variant,intron_variant                                                                        |
| rs771150095 | genic_upstream_transcript_variant,intron_variant                                                                        |
| rs771160906 | genic_upstream_transcript_variant,intron_variant                                                                        |
| rs771162921 | genic_upstream_transcript_variant,intron_variant                                                                        |
| rs771175019 | intron_variant                                                                                                          |
| rs771180044 | intron_variant                                                                                                          |
| rs771266283 | intron_variant                                                                                                          |
| rs771272738 | intron_variant                                                                                                          |
| rs771274474 | genic_downstream_transcript_variant,intron_variant                                                                      |
| rs771306637 | genic_upstream_transcript_variant,intron_variant                                                                        |
| rs771311966 | genic_upstream_transcript_variant,intron_variant                                                                        |
| rs771327980 | genic_upstream_transcript_variant,intron_variant                                                                        |
| rs771375062 | intron_variant                                                                                                          |
| rs771382902 | genic_downstream_transcript_variant,intron_variant                                                                      |
| rs771383250 | genic_downstream_transcript_variant,intron_variant                                                                      |
| rs771435910 | intron_variant                                                                                                          |
| rs771436236 | genic_downstream_transcript_variant,non_coding_transcript_variant,missense_variant,coding_sequence_variant              |
| rs771477900 | intron_variant                                                                                                          |
| rs771500235 | intron_variant                                                                                                          |
| rs771505942 | genic_downstream_transcript_variant,intron_variant                                                                      |
| rs771569093 | genic_downstream_transcript_variant,intron_variant                                                                      |
| rs771571698 | genic_downstream_transcript_variant,synonymous_variant,non_coding_transcript_variant,coding_sequence_variant            |
| rs771574814 | genic_upstream_transcript_variant,intron_variant                                                                        |
| rs771627874 | 2KB_upstream_variant,upstream_transcript_variant,genic_upstream_transcript_variant,intron_variant                       |
| rs771636506 | genic_downstream_transcript_variant,intron_variant                                                                      |
| rs771668305 | missense_variant,non_coding_transcript_variant,coding_sequence_variant                                                  |
| rs771679296 | genic_downstream_transcript_variant,non_coding_transcript_variant,frameshift_variant,coding_sequence_variant            |
| rs771685073 | genic_upstream_transcript_variant,intron_variant                                                                        |
| rs771738253 | genic_downstream_transcript_variant,intron_variant                                                                      |
| rs771739170 | genic_upstream_transcript_variant,intron_variant                                                                        |
| rs771748687 | intron_variant                                                                                                          |
| rs771762363 | genic_upstream_transcript_variant,intron_variant                                                                        |
| rs771791385 | genic_downstream_transcript_variant,intron_variant                                                                      |
| rs771831786 | genic_downstream_transcript_variant,intron_variant                                                                      |
| rs771842911 | intron_variant                                                                                                          |
| rs771843017 | genic_upstream_transcript_variant,intron_variant                                                                        |
| rs771846514 | intron_variant                                                                                                          |
| rs771872531 | intron_variant                                                                                                          |
| rs771908927 | non_coding_transcript_variant,genic_upstream_transcript_variant,coding_sequence_variant,missense_variant,intron_variant |
| rs771957466 | synonymous_variant,intron_variant,coding_sequence_variant                                                               |
| rs771985905 | genic_upstream_transcript_variant,intron_variant                                                                        |
| rs772022370 | intron_variant                                                                                                          |
| rs772036258 | genic_upstream_transcript_variant,intron_variant                                                                        |
| rs772060041 | genic_upstream_transcript_variant,intron_variant                                                                        |
| rs772067081 | 2KB_upstream_variant,upstream_transcript_variant,genic_upstream_transcript_variant,intron_variant                       |
| rs772070414 | intron_variant                                                                                                          |
| rs772089603 | intron_variant                                                                                                          |
| rs772099331 | genic_downstream_transcript_variant,intron_variant                                                                      |
| rs772174989 | genic_downstream_transcript_variant,intron_variant                                                                      |
| rs772185290 | genic_downstream_transcript_variant,intron_variant                                                                      |
| rs772188778 | genic_upstream_transcript_variant,intron_variant                                                                        |
| rs772191921 | intron_variant                                                                                                          |
| rs772210094 | intron_variant                                                                                                          |
| rs772251732 | genic_upstream_transcript_variant,intron_variant                                                                        |
| rs772264642 | intron_variant                                                                                                          |
| rs772273569 | genic_upstream_transcript_variant,intron_variant                                                                        |
| rs772324616 | genic_downstream_transcript_variant,intron_variant                                                                      |
| rs772355754 | genic_upstream_transcript_variant,intron_variant                                                                        |
| rs772367628 | intron_variant                                                                                                          |
| rs772368072 | intron_variant                                                                                                          |
| rs772380192 | intron_variant                                                                                                          |
| rs772395904 | intron_variant                                                                                                          |
| rs772411950 | genic_downstream_transcript_variant,non_coding_transcript_variant,3_prime_UTR_variant                                   |
| rs772423139 | intron_variant                                                                                                          |
| rs772429193 | intron_variant                                                                                                          |
| rs772435465 | genic_downstream_transcript_variant,synonymous_variant,non_coding_transcript_variant,coding_sequence_variant            |
| rs772478562 | genic_downstream_transcript_variant,intron_variant                                                                      |
| rs772483236 | genic_upstream_transcript_variant,intron_variant                                                                        |
| rs772517822 | genic_upstream_transcript_variant,intron_variant                                                                        |

|             |                                                                                                                           |
|-------------|---------------------------------------------------------------------------------------------------------------------------|
| rs772597264 | missense_variant,non_coding_transcript_variant,coding_sequence_variant                                                    |
| rs772601338 | intron_variant                                                                                                            |
| rs772603428 | genic_upstream_transcript_variant,intron_variant                                                                          |
| rs772628248 | intron_variant                                                                                                            |
| rs772700988 | genic_downstream_transcript_variant,intron_variant                                                                        |
| rs772735574 | genic_downstream_transcript_variant,intron_variant                                                                        |
| rs772771000 | splice_acceptor_variant,intron_variant                                                                                    |
| rs772778479 | genic_upstream_transcript_variant,intron_variant                                                                          |
| rs772792840 | genic_downstream_transcript_variant,intron_variant                                                                        |
| rs772802861 | intron_variant                                                                                                            |
| rs772808573 | genic_downstream_transcript_variant,intron_variant                                                                        |
| rs772814117 | genic_upstream_transcript_variant,intron_variant                                                                          |
| rs772825451 | genic_downstream_transcript_variant,intron_variant                                                                        |
| rs772880631 | intron_variant                                                                                                            |
| rs772881779 | 2KB_upstream_variant,upstream_transcript_variant,genic_upstream_transcript_variant,intron_variant                         |
| rs772900732 | genic_upstream_transcript_variant,intron_variant                                                                          |
| rs772912065 | intron_variant                                                                                                            |
| rs772960515 | genic_downstream_transcript_variant,intron_variant                                                                        |
| rs772960961 | intron_variant                                                                                                            |
| rs772971653 | genic_downstream_transcript_variant,non_coding_transcript_variant,3_prime_UTR_variant                                     |
| rs773019048 | genic_downstream_transcript_variant,non_coding_transcript_variant,3_prime_UTR_variant                                     |
| rs773033518 | genic_upstream_transcript_variant,intron_variant                                                                          |
| rs773044670 | genic_upstream_transcript_variant,intron_variant                                                                          |
| rs773066983 | 2KB_upstream_variant,upstream_transcript_variant,genic_upstream_transcript_variant,intron_variant                         |
| rs773102768 | genic_upstream_transcript_variant,intron_variant                                                                          |
| rs773107496 | synonymous_variant,non_coding_transcript_variant,coding_sequence_variant                                                  |
| rs773138058 | intron_variant                                                                                                            |
| rs773160188 | missense_variant,intron_variant,coding_sequence_variant                                                                   |
| rs773227861 | intron_variant                                                                                                            |
| rs773246977 | intron_variant                                                                                                            |
| rs773249836 | intron_variant                                                                                                            |
| rs773267197 | genic_upstream_transcript_variant,intron_variant                                                                          |
| rs773274779 | genic_upstream_transcript_variant,intron_variant                                                                          |
| rs773276671 | intron_variant                                                                                                            |
| rs773294911 | intron_variant                                                                                                            |
| rs773296243 | genic_upstream_transcript_variant,intron_variant                                                                          |
| rs773307293 | intron_variant                                                                                                            |
| rs773322216 | intron_variant                                                                                                            |
| rs773365033 | intron_variant                                                                                                            |
| rs773370210 | missense_variant,intron_variant,coding_sequence_variant                                                                   |
| rs773419186 | genic_downstream_transcript_variant,intron_variant                                                                        |
| rs773457266 | genic_downstream_transcript_variant,intron_variant                                                                        |
| rs773472204 | genic_downstream_transcript_variant,intron_variant                                                                        |
| rs773505925 | genic_upstream_transcript_variant,intron_variant                                                                          |
| rs773507438 | genic_upstream_transcript_variant,intron_variant                                                                          |
| rs773537252 | intron_variant                                                                                                            |
| rs773604455 | non_coding_transcript_variant,genic_upstream_transcript_variant,coding_sequence_variant,synonymous_variant,intron_variant |
| rs773645721 | genic_downstream_transcript_variant,intron_variant                                                                        |
| rs773690724 | intron_variant                                                                                                            |
| rs773704375 | intron_variant                                                                                                            |
| rs773719648 | genic_downstream_transcript_variant,synonymous_variant,non_coding_transcript_variant,coding_sequence_variant              |
| rs773725143 | genic_upstream_transcript_variant,intron_variant                                                                          |
| rs773767160 | genic_downstream_transcript_variant,intron_variant                                                                        |
| rs773774215 | intron_variant                                                                                                            |
| rs773786664 | intron_variant                                                                                                            |
| rs773799431 | genic_upstream_transcript_variant,intron_variant                                                                          |
| rs773819002 | genic_downstream_transcript_variant,intron_variant                                                                        |
| rs773830736 | missense_variant,non_coding_transcript_variant,coding_sequence_variant                                                    |
| rs773834696 | genic_downstream_transcript_variant,intron_variant                                                                        |
| rs773835378 | genic_upstream_transcript_variant,intron_variant                                                                          |
| rs773860147 | intron_variant                                                                                                            |
| rs773882064 | intron_variant                                                                                                            |
| rs773886979 | genic_upstream_transcript_variant,intron_variant                                                                          |
| rs773904282 | intron_variant                                                                                                            |
| rs773923004 | genic_downstream_transcript_variant,intron_variant                                                                        |
| rs773983076 | genic_downstream_transcript_variant,intron_variant                                                                        |
| rs774028977 | genic_downstream_transcript_variant,intron_variant                                                                        |
| rs774043814 | genic_upstream_transcript_variant,intron_variant                                                                          |
| rs774093686 | intron_variant                                                                                                            |
| rs774106710 | intron_variant                                                                                                            |
| rs774186517 | genic_upstream_transcript_variant,intron_variant                                                                          |
| rs774207320 | intron_variant                                                                                                            |
| rs774213720 | genic_downstream_transcript_variant,intron_variant                                                                        |
| rs774216118 | intron_variant                                                                                                            |

|             |                                                                                                                         |
|-------------|-------------------------------------------------------------------------------------------------------------------------|
| rs774231385 | genic_upstream_transcript_variant,intron_variant                                                                        |
| rs774388148 | intron_variant                                                                                                          |
| rs774456424 | genic_downstream_transcript_variant,intron_variant                                                                      |
| rs774473696 | intron_variant                                                                                                          |
| rs774490932 | genic_downstream_transcript_variant,non_coding_transcript_variant,3_prime_UTR_variant                                   |
| rs774531064 | genic_upstream_transcript_variant,intron_variant                                                                        |
| rs774534149 | genic_upstream_transcript_variant,intron_variant                                                                        |
| rs774556111 | intron_variant                                                                                                          |
| rs774561552 | intron_variant                                                                                                          |
| rs774562505 | genic_downstream_transcript_variant,intron_variant                                                                      |
| rs774585404 | non_coding_transcript_variant,genic_upstream_transcript_variant,coding_sequence_variant,missense_variant,intron_variant |
| rs774593771 | genic_downstream_transcript_variant,intron_variant                                                                      |
| rs774621792 | intron_variant                                                                                                          |
| rs774639922 | intron_variant                                                                                                          |
| rs774685524 | genic_upstream_transcript_variant,intron_variant                                                                        |
| rs774779741 | missense_variant,non_coding_transcript_variant,5_prime_UTR_variant,coding_sequence_variant                              |
| rs774807315 | intron_variant                                                                                                          |
| rs774817618 | genic_downstream_transcript_variant,synonymous_variant,non_coding_transcript_variant,coding_sequence_variant            |
| rs774828552 | genic_downstream_transcript_variant,intron_variant                                                                      |
| rs774832964 | intron_variant                                                                                                          |
| rs774869768 | intron_variant                                                                                                          |
| rs774874334 | genic_upstream_transcript_variant,intron_variant                                                                        |
| rs774883255 | intron_variant                                                                                                          |
| rs774885631 | synonymous_variant,non_coding_transcript_variant,coding_sequence_variant                                                |
| rs774901623 | genic_upstream_transcript_variant,intron_variant                                                                        |
| rs774914492 | genic_upstream_transcript_variant,intron_variant                                                                        |
| rs774936388 | intron_variant                                                                                                          |
| rs774952015 | intron_variant                                                                                                          |
| rs774952152 | missense_variant,non_coding_transcript_variant,coding_sequence_variant                                                  |
| rs774972566 | intron_variant                                                                                                          |
| rs775011117 | missense_variant,non_coding_transcript_variant,coding_sequence_variant                                                  |
| rs775043661 | genic_downstream_transcript_variant,non_coding_transcript_variant,missense_variant,coding_sequence_variant              |
| rs775105219 | genic_upstream_transcript_variant,intron_variant                                                                        |
| rs775150626 | intron_variant                                                                                                          |
| rs775159771 | genic_downstream_transcript_variant,intron_variant                                                                      |
| rs775176900 | genic_upstream_transcript_variant,intron_variant                                                                        |
| rs775178778 | genic_downstream_transcript_variant,intron_variant                                                                      |
| rs775183859 | missense_variant,non_coding_transcript_variant,coding_sequence_variant                                                  |
| rs775200178 | genic_downstream_transcript_variant,intron_variant                                                                      |
| rs775205260 | genic_upstream_transcript_variant,intron_variant                                                                        |
| rs775215349 | genic_downstream_transcript_variant,intron_variant                                                                      |
| rs775235138 | synonymous_variant,non_coding_transcript_variant,coding_sequence_variant                                                |
| rs775241410 | intron_variant                                                                                                          |
| rs775248095 | genic_upstream_transcript_variant,intron_variant                                                                        |
| rs775286634 | intron_variant                                                                                                          |
| rs775290780 | intron_variant                                                                                                          |
| rs775309451 | genic_upstream_transcript_variant,intron_variant                                                                        |
| rs775328951 | genic_downstream_transcript_variant,intron_variant                                                                      |
| rs775340340 | genic_downstream_transcript_variant,intron_variant                                                                      |
| rs775350202 | genic_downstream_transcript_variant,intron_variant                                                                      |
| rs775351710 | genic_downstream_transcript_variant,intron_variant                                                                      |
| rs775380286 | genic_downstream_transcript_variant,intron_variant                                                                      |
| rs775399904 | intron_variant                                                                                                          |
| rs775435029 | genic_upstream_transcript_variant,intron_variant                                                                        |
| rs775443447 | intron_variant                                                                                                          |
| rs775458347 | genic_downstream_transcript_variant,intron_variant                                                                      |
| rs775541395 | genic_downstream_transcript_variant,intron_variant                                                                      |
| rs775629036 | genic_downstream_transcript_variant,intron_variant                                                                      |
| rs775631651 | genic_downstream_transcript_variant,intron_variant                                                                      |
| rs775635934 | intron_variant                                                                                                          |
| rs775636278 | genic_upstream_transcript_variant,intron_variant                                                                        |
| rs775643960 | intron_variant                                                                                                          |
| rs775684515 | intron_variant                                                                                                          |
| rs775694331 | genic_upstream_transcript_variant,intron_variant                                                                        |
| rs775729503 | intron_variant                                                                                                          |
| rs775734997 | 2KB_upstream_variant,upstream_transcript_variant,genic_upstream_transcript_variant,intron_variant                       |
| rs775763251 | genic_upstream_transcript_variant,intron_variant                                                                        |
| rs775781308 | genic_upstream_transcript_variant,intron_variant                                                                        |
| rs775784977 | intron_variant                                                                                                          |
| rs775837022 | genic_upstream_transcript_variant,intron_variant                                                                        |
| rs775848964 | genic_upstream_transcript_variant,intron_variant                                                                        |
| rs775859892 | genic_downstream_transcript_variant,intron_variant                                                                      |
| rs775889973 | genic_upstream_transcript_variant,intron_variant                                                                        |
| rs775899680 | genic_upstream_transcript_variant,intron_variant                                                                        |

|             |                                                                                                                                             |
|-------------|---------------------------------------------------------------------------------------------------------------------------------------------|
| rs775916576 | intron_variant                                                                                                                              |
| rs775969203 | intron_variant                                                                                                                              |
| rs775986918 | intron_variant                                                                                                                              |
| rs776021887 | intron_variant                                                                                                                              |
| rs776036761 | genic_downstream_transcript_variant,intron_variant                                                                                          |
| rs776054822 | intron_variant                                                                                                                              |
| rs776067879 | genic_upstream_transcript_variant,intron_variant                                                                                            |
| rs776070341 | genic_upstream_transcript_variant,intron_variant                                                                                            |
| rs776074043 | intron_variant                                                                                                                              |
| rs776075302 | genic_upstream_transcript_variant,intron_variant                                                                                            |
| rs776086522 | intron_variant                                                                                                                              |
| rs776086725 | intron_variant                                                                                                                              |
| rs776103715 | genic_upstream_transcript_variant,intron_variant                                                                                            |
| rs776137927 | synonymous_variant,non_coding_transcript_variant,coding_sequence_variant                                                                    |
| rs776142243 | genic_downstream_transcript_variant,intron_variant                                                                                          |
| rs776179393 | intron_variant                                                                                                                              |
| rs776202512 | genic_downstream_transcript_variant,intron_variant                                                                                          |
| rs776228225 | genic_downstream_transcript_variant,intron_variant                                                                                          |
| rs776267715 | intron_variant                                                                                                                              |
| rs776396109 | intron_variant                                                                                                                              |
| rs776398619 | genic_upstream_transcript_variant,intron_variant                                                                                            |
| rs776418678 | genic_upstream_transcript_variant,intron_variant                                                                                            |
| rs776426414 | non_coding_transcript_variant,genic_upstream_transcript_variant,coding_sequence_variant,missense_variant,intron_variant                     |
| rs776449230 | genic_upstream_transcript_variant,intron_variant                                                                                            |
| rs776453842 | genic_upstream_transcript_variant,intron_variant                                                                                            |
| rs776515946 | genic_upstream_transcript_variant,intron_variant                                                                                            |
| rs776541753 | intron_variant                                                                                                                              |
| rs776559516 | genic_upstream_transcript_variant,intron_variant                                                                                            |
| rs776562646 | intron_variant                                                                                                                              |
| rs776564008 | genic_downstream_transcript_variant,intron_variant                                                                                          |
| rs776571309 | genic_downstream_transcript_variant,intron_variant                                                                                          |
| rs776573546 | genic_upstream_transcript_variant,intron_variant                                                                                            |
| rs776589175 | genic_upstream_transcript_variant,intron_variant                                                                                            |
| rs776640090 | non_coding_transcript_variant,genic_upstream_transcript_variant,coding_sequence_variant,5_prime_UTR_variant,missense_variant,intron_variant |
| rs776651937 | synonymous_variant,non_coding_transcript_variant,coding_sequence_variant                                                                    |
| rs776653997 | genic_downstream_transcript_variant,intron_variant                                                                                          |
| rs776654237 | genic_downstream_transcript_variant,intron_variant                                                                                          |
| rs776671844 | intron_variant                                                                                                                              |
| rs776673450 | intron_variant                                                                                                                              |
| rs776714088 | genic_downstream_transcript_variant,intron_variant                                                                                          |
| rs776730375 | intron_variant                                                                                                                              |
| rs776735081 | genic_upstream_transcript_variant,intron_variant                                                                                            |
| rs776754079 | intron_variant,genic_upstream_transcript_variant                                                                                            |
| rs776756331 | intron_variant                                                                                                                              |
| rs776766309 | intron_variant,genic_downstream_transcript_variant,downstream_transcript_variant                                                            |
| rs776773955 | intron_variant                                                                                                                              |
| rs776798807 | intron_variant,genic_upstream_transcript_variant                                                                                            |
| rs776809301 | intron_variant                                                                                                                              |
| rs776829098 | intron_variant,synonymous_variant,coding_sequence_variant                                                                                   |
| rs776840873 | intron_variant,genic_upstream_transcript_variant                                                                                            |
| rs776895034 | intron_variant,genic_downstream_transcript_variant                                                                                          |
| rs776928564 | intron_variant                                                                                                                              |
| rs776957271 | intron_variant,upstream_transcript_variant,genic_upstream_transcript_variant,2KB_upstream_variant                                           |
| rs776983934 | intron_variant,genic_upstream_transcript_variant                                                                                            |
| rs777057689 | intron_variant,genic_downstream_transcript_variant                                                                                          |
| rs777095825 | intron_variant                                                                                                                              |
| rs777147946 | intron_variant,genic_upstream_transcript_variant                                                                                            |
| rs777152817 | 5_prime_UTR_variant,intron_variant                                                                                                          |
| rs777181515 | intron_variant                                                                                                                              |
| rs777182688 | intron_variant                                                                                                                              |
| rs777188029 | intron_variant,genic_upstream_transcript_variant                                                                                            |
| rs777200215 | intron_variant,genic_downstream_transcript_variant                                                                                          |
| rs777212789 | intron_variant,genic_upstream_transcript_variant                                                                                            |
| rs777214043 | coding_sequence_variant,genic_downstream_transcript_variant,non_coding_transcript_variant,missense_variant                                  |
| rs777220198 | intron_variant                                                                                                                              |
| rs777280338 | intron_variant,genic_upstream_transcript_variant                                                                                            |
| rs777292117 | intron_variant,genic_upstream_transcript_variant                                                                                            |
| rs777309408 | intron_variant,genic_downstream_transcript_variant                                                                                          |
| rs777311092 | genic_downstream_transcript_variant,non_coding_transcript_variant,3_prime_UTR_variant                                                       |
| rs777323971 | intron_variant,genic_upstream_transcript_variant                                                                                            |
| rs777366204 | intron_variant,genic_upstream_transcript_variant                                                                                            |
| rs777367882 | synonymous_variant,coding_sequence_variant,non_coding_transcript_variant                                                                    |
| rs777380968 | intron_variant                                                                                                                              |
| rs777385331 | intron_variant,genic_upstream_transcript_variant                                                                                            |

|             |                                                                                                                           |
|-------------|---------------------------------------------------------------------------------------------------------------------------|
| rs777402379 | synonymous_variant,coding_sequence_variant,genic_downstream_transcript_variant,non_coding_transcript_variant              |
| rs777414377 | intron_variant,genic_downstream_transcript_variant                                                                        |
| rs777423152 | intron_variant                                                                                                            |
| rs777423234 | intron_variant,genic_upstream_transcript_variant                                                                          |
| rs777425331 | intron_variant                                                                                                            |
| rs777436282 | intron_variant,genic_upstream_transcript_variant                                                                          |
| rs777473183 | intron_variant,missense_variant,non_coding_transcript_variant,genic_upstream_transcript_variant,coding_sequence_variant   |
| rs777490511 | intron_variant,upstream_transcript_variant,genic_upstream_transcript_variant,2KB_upstream_variant                         |
| rs777553893 | intron_variant,genic_upstream_transcript_variant                                                                          |
| rs777556288 | intron_variant                                                                                                            |
| rs777608334 | intron_variant,genic_downstream_transcript_variant                                                                        |
| rs777609309 | intron_variant                                                                                                            |
| rs777610887 | intron_variant                                                                                                            |
| rs777624815 | intron_variant,genic_downstream_transcript_variant                                                                        |
| rs777651966 | intron_variant,genic_downstream_transcript_variant                                                                        |
| rs777670783 | intron_variant,genic_upstream_transcript_variant                                                                          |
| rs777691235 | intron_variant                                                                                                            |
| rs777753098 | intron_variant,genic_downstream_transcript_variant                                                                        |
| rs777763851 | intron_variant                                                                                                            |
| rs777779283 | intron_variant,genic_upstream_transcript_variant                                                                          |
| rs777810342 | intron_variant,genic_upstream_transcript_variant                                                                          |
| rs777833095 | coding_sequence_variant,non_coding_transcript_variant,missense_variant                                                    |
| rs777843595 | intron_variant,genic_upstream_transcript_variant                                                                          |
| rs777883495 | intron_variant                                                                                                            |
| rs777959426 | intron_variant,genic_upstream_transcript_variant                                                                          |
| rs777961116 | upstream_transcript_variant,intron_variant,2KB_upstream_variant,genic_upstream_transcript_variant                         |
| rs777985196 | intron_variant,genic_downstream_transcript_variant                                                                        |
| rs777995744 | intron_variant,genic_downstream_transcript_variant                                                                        |
| rs778002788 | intron_variant                                                                                                            |
| rs778067527 | intron_variant,genic_upstream_transcript_variant                                                                          |
| rs778121111 | intron_variant                                                                                                            |
| rs778150393 | intron_variant                                                                                                            |
| rs778158901 | intron_variant                                                                                                            |
| rs778165612 | intron_variant                                                                                                            |
| rs778238570 | intron_variant                                                                                                            |
| rs778261185 | intron_variant                                                                                                            |
| rs778264060 | intron_variant,genic_downstream_transcript_variant                                                                        |
| rs778282062 | coding_sequence_variant,genic_downstream_transcript_variant,non_coding_transcript_variant,missense_variant                |
| rs778298921 | intron_variant,genic_downstream_transcript_variant                                                                        |
| rs778309347 | coding_sequence_variant,non_coding_transcript_variant,missense_variant                                                    |
| rs778318661 | intron_variant,genic_upstream_transcript_variant                                                                          |
| rs778359072 | intron_variant,genic_downstream_transcript_variant                                                                        |
| rs778375178 | coding_sequence_variant,intron_variant,missense_variant                                                                   |
| rs778415960 | intron_variant,non_coding_transcript_variant,genic_upstream_transcript_variant,synonymous_variant,coding_sequence_variant |
| rs778425096 | intron_variant,genic_upstream_transcript_variant                                                                          |
| rs778434987 | intron_variant,genic_upstream_transcript_variant                                                                          |
| rs778448140 | intron_variant,genic_downstream_transcript_variant                                                                        |
| rs778450148 | intron_variant                                                                                                            |
| rs778467568 | intron_variant                                                                                                            |
| rs778484201 | intron_variant,genic_downstream_transcript_variant                                                                        |
| rs778503876 | intron_variant,genic_upstream_transcript_variant                                                                          |
| rs778505186 | upstream_transcript_variant,intron_variant,2KB_upstream_variant,genic_upstream_transcript_variant                         |
| rs778520785 | intron_variant,genic_downstream_transcript_variant                                                                        |
| rs778528018 | intron_variant,genic_upstream_transcript_variant                                                                          |
| rs778573027 | intron_variant,genic_upstream_transcript_variant                                                                          |
| rs778587768 | intron_variant,genic_downstream_transcript_variant                                                                        |
| rs778609534 | intron_variant,genic_upstream_transcript_variant                                                                          |
| rs778614607 | intron_variant                                                                                                            |
| rs778626291 | coding_sequence_variant,non_coding_transcript_variant,missense_variant                                                    |
| rs778629511 | intron_variant                                                                                                            |
| rs778664530 | intron_variant                                                                                                            |
| rs778681345 | intron_variant                                                                                                            |
| rs778681378 | intron_variant                                                                                                            |
| rs778736289 | intron_variant,genic_downstream_transcript_variant                                                                        |
| rs778759130 | intron_variant,genic_downstream_transcript_variant                                                                        |
| rs778761793 | intron_variant                                                                                                            |
| rs778787496 | intron_variant                                                                                                            |
| rs778814556 | intron_variant,genic_upstream_transcript_variant                                                                          |
| rs778884266 | synonymous_variant,coding_sequence_variant,genic_downstream_transcript_variant,non_coding_transcript_variant              |
| rs778904798 | intron_variant                                                                                                            |
| rs778914669 | intron_variant,genic_upstream_transcript_variant                                                                          |
| rs778970616 | coding_sequence_variant,genic_downstream_transcript_variant,non_coding_transcript_variant,missense_variant                |
| rs778987291 | intron_variant,genic_upstream_transcript_variant                                                                          |
| rs779012697 | intron_variant                                                                                                            |

|             |                                                                                                                         |
|-------------|-------------------------------------------------------------------------------------------------------------------------|
| rs779038672 | upstream_transcript_variant,intron_variant,2KB_upstream_variant,genic_upstream_transcript_variant                       |
| rs779067011 | intron_variant,genic_upstream_transcript_variant                                                                        |
| rs779070975 | intron_variant,genic_upstream_transcript_variant                                                                        |
| rs779093243 | intron_variant,genic_downstream_transcript_variant,downstream_transcript_variant                                        |
| rs779104334 | intron_variant,genic_upstream_transcript_variant                                                                        |
| rs779124983 | intron_variant,genic_upstream_transcript_variant                                                                        |
| rs779146959 | intron_variant,genic_downstream_transcript_variant                                                                      |
| rs779157918 | intron_variant,genic_upstream_transcript_variant                                                                        |
| rs779165473 | intron_variant                                                                                                          |
| rs779172881 | intron_variant                                                                                                          |
| rs779218607 | frameshift_variant,coding_sequence_variant,non_coding_transcript_variant                                                |
| rs779234527 | intron_variant,genic_downstream_transcript_variant                                                                      |
| rs779284022 | intron_variant,genic_upstream_transcript_variant                                                                        |
| rs779289387 | intron_variant                                                                                                          |
| rs779328011 | synonymous_variant,coding_sequence_variant,non_coding_transcript_variant                                                |
| rs779339728 | coding_sequence_variant,genic_downstream_transcript_variant,non_coding_transcript_variant,missense_variant              |
| rs779346485 | intron_variant,upstream_transcript_variant,genic_upstream_transcript_variant,2KB_upstream_variant                       |
| rs779353566 | intron_variant,genic_upstream_transcript_variant                                                                        |
| rs779356180 | intron_variant,genic_downstream_transcript_variant                                                                      |
| rs779395066 | intron_variant                                                                                                          |
| rs779395507 | intron_variant                                                                                                          |
| rs779441001 | intron_variant,genic_upstream_transcript_variant                                                                        |
| rs779545151 | intron_variant                                                                                                          |
| rs779571629 | intron_variant,upstream_transcript_variant,genic_upstream_transcript_variant,2KB_upstream_variant                       |
| rs779579721 | intron_variant                                                                                                          |
| rs779587544 | synonymous_variant,coding_sequence_variant,intron_variant                                                               |
| rs779604155 | intron_variant,genic_downstream_transcript_variant                                                                      |
| rs779636079 | intron_variant,genic_upstream_transcript_variant                                                                        |
| rs779661923 | intron_variant                                                                                                          |
| rs779666633 | intron_variant,genic_upstream_transcript_variant                                                                        |
| rs779671766 | intron_variant,genic_upstream_transcript_variant                                                                        |
| rs779675074 | intron_variant,genic_upstream_transcript_variant                                                                        |
| rs779688649 | genic_downstream_transcript_variant,non_coding_transcript_variant,3_prime_UTR_variant                                   |
| rs779694924 | intron_variant,synonymous_variant,coding_sequence_variant                                                               |
| rs779763150 | intron_variant,genic_upstream_transcript_variant                                                                        |
| rs779786138 | intron_variant,genic_downstream_transcript_variant                                                                      |
| rs779832602 | intron_variant                                                                                                          |
| rs779850530 | intron_variant,genic_downstream_transcript_variant                                                                      |
| rs779880717 | intron_variant                                                                                                          |
| rs779931654 | intron_variant                                                                                                          |
| rs779950475 | 5_prime_UTR_variant,synonymous_variant,coding_sequence_variant,non_coding_transcript_variant                            |
| rs779971558 | intron_variant                                                                                                          |
| rs779985742 | intron_variant                                                                                                          |
| rs780021124 | intron_variant,genic_downstream_transcript_variant                                                                      |
| rs780044012 | intron_variant                                                                                                          |
| rs780054879 | intron_variant                                                                                                          |
| rs780136309 | intron_variant,genic_downstream_transcript_variant                                                                      |
| rs780141946 | intron_variant                                                                                                          |
| rs780154942 | intron_variant,genic_downstream_transcript_variant                                                                      |
| rs780236216 | intron_variant                                                                                                          |
| rs780285360 | intron_variant                                                                                                          |
| rs780287516 | coding_sequence_variant,non_coding_transcript_variant,missense_variant                                                  |
| rs780294514 | intron_variant,genic_upstream_transcript_variant                                                                        |
| rs780296617 | intron_variant,genic_upstream_transcript_variant                                                                        |
| rs780317042 | intron_variant,genic_downstream_transcript_variant                                                                      |
| rs780355204 | genic_downstream_transcript_variant,non_coding_transcript_variant,3_prime_UTR_variant                                   |
| rs780385471 | intron_variant,genic_downstream_transcript_variant                                                                      |
| rs780411452 | intron_variant,missense_variant,non_coding_transcript_variant,genic_upstream_transcript_variant,coding_sequence_variant |
| rs780465335 | upstream_transcript_variant,intron_variant,2KB_upstream_variant,genic_upstream_transcript_variant                       |
| rs780485505 | intron_variant                                                                                                          |
| rs780550641 | intron_variant                                                                                                          |
| rs780589650 | intron_variant,genic_downstream_transcript_variant                                                                      |
| rs780607606 | intron_variant                                                                                                          |
| rs780616626 | intron_variant                                                                                                          |
| rs780652026 | intron_variant,genic_downstream_transcript_variant                                                                      |
| rs780686331 | intron_variant,genic_upstream_transcript_variant                                                                        |
| rs780704997 | intron_variant,genic_upstream_transcript_variant                                                                        |
| rs780707791 | intron_variant,genic_downstream_transcript_variant                                                                      |
| rs780766198 | coding_sequence_variant,non_coding_transcript_variant,missense_variant                                                  |
| rs780792079 | intron_variant,genic_upstream_transcript_variant                                                                        |
| rs780792766 | intron_variant,genic_upstream_transcript_variant                                                                        |
| rs780799092 | intron_variant,genic_upstream_transcript_variant                                                                        |
| rs780802188 | intron_variant                                                                                                          |
| rs780813482 | intron_variant                                                                                                          |

|             |                                                                                                                           |
|-------------|---------------------------------------------------------------------------------------------------------------------------|
| rs780815764 | intron_variant,upstream_transcript_variant,genic_upstream_transcript_variant,2KB_upstream_variant                         |
| rs780819058 | coding_sequence_variant,genic_downstream_transcript_variant,non_coding_transcript_variant,missense_variant                |
| rs780855618 | synonymous_variant,coding_sequence_variant,non_coding_transcript_variant                                                  |
| rs780875548 | intron_variant,genic_upstream_transcript_variant                                                                          |
| rs780928472 | intron_variant,non_coding_transcript_variant,genic_upstream_transcript_variant,synonymous_variant,coding_sequence_variant |
| rs780930361 | intron_variant                                                                                                            |
| rs780949820 | intron_variant,genic_downstream_transcript_variant                                                                        |
| rs780969642 | intron_variant,genic_upstream_transcript_variant                                                                          |
| rs781051400 | intron_variant,genic_downstream_transcript_variant                                                                        |
| rs781062382 | intron_variant                                                                                                            |
| rs781069869 | intron_variant                                                                                                            |
| rs781124848 | intron_variant                                                                                                            |
| rs781129270 | intron_variant,genic_downstream_transcript_variant                                                                        |
| rs781129767 | intron_variant,genic_downstream_transcript_variant                                                                        |
| rs781180945 | intron_variant,genic_downstream_transcript_variant                                                                        |
| rs781197995 | intron_variant                                                                                                            |
| rs781206797 | intron_variant                                                                                                            |
| rs781207398 | intron_variant                                                                                                            |
| rs781221151 | intron_variant,genic_upstream_transcript_variant                                                                          |
| rs781257931 | coding_sequence_variant,non_coding_transcript_variant,missense_variant                                                    |
| rs781264989 | intron_variant                                                                                                            |
| rs781298100 | intron_variant,genic_downstream_transcript_variant                                                                        |
| rs781308852 | intron_variant,genic_upstream_transcript_variant                                                                          |
| rs781344739 | intron_variant,genic_upstream_transcript_variant                                                                          |
| rs781381710 | intron_variant,genic_upstream_transcript_variant                                                                          |
| rs781381929 | intron_variant,genic_downstream_transcript_variant                                                                        |
| rs781383911 | intron_variant                                                                                                            |
| rs781401324 | intron_variant                                                                                                            |
| rs781433659 | missense_variant,non_coding_transcript_variant,genic_downstream_transcript_variant,stop_gained,coding_sequence_variant    |
| rs781469951 | intron_variant,genic_upstream_transcript_variant                                                                          |
| rs781486731 | intron_variant,genic_downstream_transcript_variant                                                                        |
| rs781488136 | intron_variant                                                                                                            |
| rs781505735 | intron_variant,genic_downstream_transcript_variant                                                                        |
| rs781521245 | intron_variant                                                                                                            |
| rs781524190 | intron_variant                                                                                                            |
| rs781579372 | intron_variant                                                                                                            |
| rs781581028 | intron_variant                                                                                                            |
| rs781604780 | intron_variant,genic_upstream_transcript_variant                                                                          |
| rs781609446 | intron_variant,genic_downstream_transcript_variant                                                                        |
| rs781614353 | genic_downstream_transcript_variant,non_coding_transcript_variant,3_prime_UTR_variant                                     |
| rs781625430 | intron_variant,genic_downstream_transcript_variant                                                                        |
| rs781644862 | intron_variant                                                                                                            |
| rs781650156 | intron_variant,genic_upstream_transcript_variant                                                                          |
| rs781680431 | intron_variant                                                                                                            |
| rs781686908 | coding_sequence_variant,genic_downstream_transcript_variant,non_coding_transcript_variant,missense_variant                |
| rs781735854 | intron_variant                                                                                                            |
| rs781763089 | intron_variant,genic_upstream_transcript_variant                                                                          |
| rs781774783 | intron_variant,genic_upstream_transcript_variant                                                                          |
| rs796071410 | intron_variant,genic_upstream_transcript_variant                                                                          |
| rs796127593 | intron_variant,genic_upstream_transcript_variant                                                                          |
| rs796135284 | intron_variant,genic_downstream_transcript_variant                                                                        |
| rs796135481 | intron_variant,genic_upstream_transcript_variant                                                                          |
| rs796184995 | intron_variant,genic_upstream_transcript_variant                                                                          |
| rs796186474 | intron_variant,genic_upstream_transcript_variant                                                                          |
| rs796292241 | intron_variant                                                                                                            |
| rs796323371 | intron_variant,genic_upstream_transcript_variant                                                                          |
| rs796447036 | intron_variant,genic_upstream_transcript_variant                                                                          |
| rs796448506 | intron_variant,genic_upstream_transcript_variant                                                                          |
| rs796471380 | 5_prime_UTR_variant,intron_variant                                                                                        |
| rs796498668 | intron_variant,genic_downstream_transcript_variant                                                                        |
| rs796579144 | intron_variant                                                                                                            |
| rs796590489 | upstream_transcript_variant,intron_variant,genic_upstream_transcript_variant                                              |
| rs796794767 | intron_variant,genic_upstream_transcript_variant                                                                          |
| rs796823658 | intron_variant,genic_downstream_transcript_variant                                                                        |
| rs796839041 | intron_variant                                                                                                            |
| rs796872180 | intron_variant                                                                                                            |
| rs796941186 | intron_variant,genic_upstream_transcript_variant                                                                          |
| rs865868534 | intron_variant                                                                                                            |
| rs865895969 | intron_variant,genic_upstream_transcript_variant                                                                          |
| rs865996178 | intron_variant                                                                                                            |
| rs866021466 | intron_variant,genic_upstream_transcript_variant                                                                          |
| rs866072933 | synonymous_variant,coding_sequence_variant,non_coding_transcript_variant                                                  |
| rs866116019 | intron_variant                                                                                                            |
| rs866117463 | intron_variant                                                                                                            |

|             |                                                                                                                         |
|-------------|-------------------------------------------------------------------------------------------------------------------------|
| rs866129732 | intron_variant,genic_upstream_transcript_variant                                                                        |
| rs866135295 | intron_variant                                                                                                          |
| rs866139419 | intron_variant                                                                                                          |
| rs866147016 | upstream_transcript_variant,intron_variant,2KB_upstream_variant,genic_upstream_transcript_variant                       |
| rs866156213 | intron_variant,genic_upstream_transcript_variant                                                                        |
| rs866158270 | intron_variant,genic_upstream_transcript_variant                                                                        |
| rs866163516 | intron_variant                                                                                                          |
| rs866255765 | intron_variant                                                                                                          |
| rs866282792 | intron_variant,genic_downstream_transcript_variant                                                                      |
| rs866285134 | intron_variant                                                                                                          |
| rs866377933 | intron_variant,genic_downstream_transcript_variant                                                                      |
| rs866411626 | intron_variant,genic_downstream_transcript_variant                                                                      |
| rs866413148 | intron_variant,genic_downstream_transcript_variant                                                                      |
| rs866464968 | coding_sequence_variant,genic_downstream_transcript_variant,non_coding_transcript_variant,missense_variant              |
| rs866517595 | intron_variant,genic_upstream_transcript_variant                                                                        |
| rs866559477 | intron_variant,genic_upstream_transcript_variant                                                                        |
| rs866561655 | intron_variant,genic_downstream_transcript_variant                                                                      |
| rs866567825 | intron_variant                                                                                                          |
| rs866596003 | intron_variant,genic_upstream_transcript_variant                                                                        |
| rs866596302 | intron_variant,genic_upstream_transcript_variant                                                                        |
| rs866600031 | intron_variant,genic_upstream_transcript_variant                                                                        |
| rs866630185 | intron_variant,genic_downstream_transcript_variant                                                                      |
| rs866717048 | intron_variant,genic_downstream_transcript_variant                                                                      |
| rs866717311 | intron_variant                                                                                                          |
| rs866726960 | intron_variant,genic_upstream_transcript_variant                                                                        |
| rs866758369 | intron_variant                                                                                                          |
| rs866780626 | intron_variant,genic_upstream_transcript_variant                                                                        |
| rs866844720 | intron_variant                                                                                                          |
| rs866866444 | intron_variant,genic_upstream_transcript_variant                                                                        |
| rs866866604 | intron_variant,genic_upstream_transcript_variant                                                                        |
| rs866873279 | intron_variant,missense_variant,non_coding_transcript_variant,genic_upstream_transcript_variant,coding_sequence_variant |
| rs866903795 | intron_variant                                                                                                          |
| rs866909935 | intron_variant                                                                                                          |
| rs866913843 | intron_variant,genic_upstream_transcript_variant                                                                        |
| rs866962614 | intron_variant                                                                                                          |
| rs866974270 | intron_variant,genic_downstream_transcript_variant                                                                      |
| rs866976422 | intron_variant,genic_upstream_transcript_variant                                                                        |
| rs866980293 | intron_variant                                                                                                          |
| rs867004471 | intron_variant,genic_upstream_transcript_variant                                                                        |
| rs867043640 | intron_variant                                                                                                          |
| rs867051450 | intron_variant                                                                                                          |
| rs867059626 | intron_variant,genic_upstream_transcript_variant                                                                        |
| rs867064468 | coding_sequence_variant,genic_downstream_transcript_variant,non_coding_transcript_variant,missense_variant              |
| rs867075700 | intron_variant,upstream_transcript_variant,genic_upstream_transcript_variant,2KB_upstream_variant                       |
| rs867128229 | intron_variant,genic_upstream_transcript_variant                                                                        |
| rs867189432 | intron_variant                                                                                                          |
| rs867225791 | intron_variant,genic_upstream_transcript_variant                                                                        |
| rs867246020 | intron_variant,genic_upstream_transcript_variant                                                                        |
| rs867317441 | intron_variant                                                                                                          |
| rs867324138 | intron_variant,genic_downstream_transcript_variant                                                                      |
| rs867330835 | intron_variant,genic_upstream_transcript_variant                                                                        |
| rs867336692 | intron_variant,upstream_transcript_variant,genic_upstream_transcript_variant,2KB_upstream_variant                       |
| rs867395176 | intron_variant,genic_downstream_transcript_variant                                                                      |
| rs867401932 | intron_variant                                                                                                          |
| rs867409805 | intron_variant,genic_upstream_transcript_variant                                                                        |
| rs867418929 | intron_variant,genic_upstream_transcript_variant                                                                        |
| rs867419146 | intron_variant,genic_downstream_transcript_variant                                                                      |
| rs867422334 | intron_variant,genic_upstream_transcript_variant                                                                        |
| rs867429752 | intron_variant,genic_downstream_transcript_variant                                                                      |
| rs867538349 | intron_variant                                                                                                          |
| rs867560373 | intron_variant,upstream_transcript_variant,genic_upstream_transcript_variant,2KB_upstream_variant                       |
| rs867569589 | intron_variant                                                                                                          |
| rs867650544 | intron_variant                                                                                                          |
| rs867656845 | intron_variant,genic_downstream_transcript_variant                                                                      |
| rs867667440 | intron_variant,genic_downstream_transcript_variant                                                                      |
| rs867673904 | intron_variant                                                                                                          |
| rs867708964 | intron_variant,genic_upstream_transcript_variant                                                                        |
| rs867709212 | intron_variant                                                                                                          |
| rs867718119 | intron_variant,genic_upstream_transcript_variant                                                                        |
| rs867769502 | coding_sequence_variant,genic_downstream_transcript_variant,non_coding_transcript_variant,missense_variant              |
| rs867816790 | intron_variant,genic_downstream_transcript_variant                                                                      |
| rs867827441 | intron_variant,genic_upstream_transcript_variant                                                                        |
| rs867828084 | intron_variant                                                                                                          |
| rs867831902 | intron_variant,genic_upstream_transcript_variant                                                                        |

|             |                                                                                                                           |
|-------------|---------------------------------------------------------------------------------------------------------------------------|
| rs867883956 | intron_variant,genic_downstream_transcript_variant                                                                        |
| rs867933645 | intron_variant,genic_downstream_transcript_variant                                                                        |
| rs867943410 | intron_variant                                                                                                            |
| rs867943897 | intron_variant,genic_upstream_transcript_variant                                                                          |
| rs867956036 | genic_upstream_transcript_variant,intron_variant                                                                          |
| rs867960474 | genic_upstream_transcript_variant,intron_variant                                                                          |
| rs867962356 | upstream_transcript_variant,intron_variant,genic_upstream_transcript_variant                                              |
| rs867967813 | genic_upstream_transcript_variant,intron_variant                                                                          |
| rs867969566 | genic_upstream_transcript_variant,intron_variant,upstream_transcript_variant,2KB_upstream_variant                         |
| rs868003416 | genic_upstream_transcript_variant,missense_variant,coding_sequence_variant,intron_variant,non_coding_transcript_variant   |
| rs868027278 | intron_variant                                                                                                            |
| rs868034735 | genic_upstream_transcript_variant,intron_variant                                                                          |
| rs868076820 | intron_variant                                                                                                            |
| rs868084131 | intron_variant,genic_downstream_transcript_variant                                                                        |
| rs868094939 | genic_upstream_transcript_variant,intron_variant                                                                          |
| rs868098829 | genic_upstream_transcript_variant,intron_variant                                                                          |
| rs868108321 | genic_upstream_transcript_variant,intron_variant                                                                          |
| rs868142960 | 3_prime_UTR_variant,genic_downstream_transcript_variant,non_coding_transcript_variant                                     |
| rs868155049 | genic_upstream_transcript_variant,intron_variant                                                                          |
| rs868166944 | genic_upstream_transcript_variant,intron_variant                                                                          |
| rs868171636 | genic_upstream_transcript_variant,intron_variant                                                                          |
| rs868272311 | genic_upstream_transcript_variant,intron_variant                                                                          |
| rs868280487 | intron_variant                                                                                                            |
| rs868282379 | genic_upstream_transcript_variant,intron_variant                                                                          |
| rs868294475 | genic_upstream_transcript_variant,intron_variant,upstream_transcript_variant,2KB_upstream_variant                         |
| rs868395705 | intron_variant                                                                                                            |
| rs868403794 | intron_variant                                                                                                            |
| rs868419564 | intron_variant                                                                                                            |
| rs868431935 | genic_upstream_transcript_variant,intron_variant                                                                          |
| rs868433277 | intron_variant                                                                                                            |
| rs868437104 | coding_sequence_variant,missense_variant,non_coding_transcript_variant                                                    |
| rs868440205 | intron_variant,genic_downstream_transcript_variant                                                                        |
| rs868540974 | genic_upstream_transcript_variant,intron_variant                                                                          |
| rs868575976 | intron_variant                                                                                                            |
| rs868665823 | genic_upstream_transcript_variant,intron_variant                                                                          |
| rs868681924 | genic_upstream_transcript_variant,intron_variant                                                                          |
| rs868720067 | intron_variant                                                                                                            |
| rs868813295 | intron_variant,genic_downstream_transcript_variant                                                                        |
| rs868820030 | genic_upstream_transcript_variant,intron_variant                                                                          |
| rs869054681 | genic_upstream_transcript_variant,frameshift_variant,coding_sequence_variant,intron_variant,non_coding_transcript_variant |
| rs869072784 | intron_variant,genic_downstream_transcript_variant                                                                        |
| rs869074523 | intron_variant                                                                                                            |
| rs869084827 | genic_upstream_transcript_variant,frameshift_variant,coding_sequence_variant,intron_variant,non_coding_transcript_variant |
| rs869087957 | intron_variant,genic_upstream_transcript_variant,non_coding_transcript_variant,5_prime_UTR_variant                        |
| rs869105634 | 3_prime_UTR_variant,genic_downstream_transcript_variant,non_coding_transcript_variant                                     |
| rs869108679 | intron_variant,genic_downstream_transcript_variant                                                                        |
| rs869116751 | genic_upstream_transcript_variant,intron_variant                                                                          |
| rs869117608 | intron_variant                                                                                                            |
| rs869130595 | intron_variant                                                                                                            |
| rs869136712 | intron_variant,genic_downstream_transcript_variant                                                                        |
| rs869144331 | intron_variant                                                                                                            |
| rs869157577 | genic_upstream_transcript_variant,intron_variant                                                                          |
| rs869159251 | intron_variant                                                                                                            |
| rs869193290 | intron_variant                                                                                                            |
| rs869198656 | intron_variant                                                                                                            |
| rs869203467 | intron_variant                                                                                                            |
| rs869216735 | genic_upstream_transcript_variant,intron_variant                                                                          |
| rs869225402 | intron_variant,genic_downstream_transcript_variant                                                                        |
| rs869226067 | frameshift_variant,coding_sequence_variant,genic_downstream_transcript_variant,non_coding_transcript_variant              |
| rs869258875 | intron_variant,genic_downstream_transcript_variant                                                                        |
| rs869286835 | frameshift_variant,coding_sequence_variant,genic_downstream_transcript_variant,non_coding_transcript_variant              |
| rs879027402 | genic_upstream_transcript_variant,intron_variant                                                                          |
| rs879035111 | intron_variant                                                                                                            |
| rs879123272 | intron_variant                                                                                                            |
| rs879171843 | genic_upstream_transcript_variant,intron_variant                                                                          |
| rs879208715 | intron_variant                                                                                                            |
| rs879221608 | genic_upstream_transcript_variant,intron_variant                                                                          |
| rs879269110 | intron_variant                                                                                                            |
| rs879274787 | intron_variant,genic_downstream_transcript_variant                                                                        |
| rs879319935 | intron_variant                                                                                                            |
| rs879335257 | genic_upstream_transcript_variant,intron_variant                                                                          |
| rs879377675 | intron_variant                                                                                                            |
| rs879396963 | intron_variant                                                                                                            |
| rs879467954 | intron_variant                                                                                                            |

|             |                                                                                       |
|-------------|---------------------------------------------------------------------------------------|
| rs879471092 | intron_variant                                                                        |
| rs879478588 | genic_upstream_transcript_variant,intron_variant                                      |
| rs879517306 | genic_upstream_transcript_variant,intron_variant                                      |
| rs879544290 | intron_variant                                                                        |
| rs879564380 | intron_variant                                                                        |
| rs879592861 | intron_variant                                                                        |
| rs879619622 | intron_variant,genic_downstream_transcript_variant                                    |
| rs879630821 | genic_upstream_transcript_variant,intron_variant                                      |
| rs879657325 | genic_upstream_transcript_variant,intron_variant                                      |
| rs879675122 | intron_variant                                                                        |
| rs879712674 | intron_variant                                                                        |
| rs879738827 | intron_variant,genic_downstream_transcript_variant                                    |
| rs879744409 | intron_variant                                                                        |
| rs879790658 | genic_upstream_transcript_variant,intron_variant                                      |
| rs879825420 | genic_upstream_transcript_variant,intron_variant                                      |
| rs879866507 | genic_upstream_transcript_variant,intron_variant                                      |
| rs879888437 | genic_upstream_transcript_variant,intron_variant                                      |
| rs879896121 | intron_variant                                                                        |
| rs879919011 | intron_variant                                                                        |
| rs879925029 | intron_variant                                                                        |
| rs879938776 | genic_upstream_transcript_variant,intron_variant                                      |
| rs886072095 | intron_variant,genic_downstream_transcript_variant                                    |
| rs886074868 | intron_variant                                                                        |
| rs886080901 | genic_upstream_transcript_variant,intron_variant                                      |
| rs886123579 | genic_upstream_transcript_variant,intron_variant                                      |
| rs886176993 | intron_variant,genic_downstream_transcript_variant                                    |
| rs886181716 | intron_variant                                                                        |
| rs886215714 | genic_upstream_transcript_variant,intron_variant                                      |
| rs886229149 | intron_variant                                                                        |
| rs886250431 | genic_upstream_transcript_variant,intron_variant                                      |
| rs886295354 | intron_variant                                                                        |
| rs886303991 | genic_upstream_transcript_variant,intron_variant                                      |
| rs886312940 | intron_variant,genic_downstream_transcript_variant                                    |
| rs886317880 | intron_variant                                                                        |
| rs886342773 | genic_upstream_transcript_variant,intron_variant                                      |
| rs886356161 | genic_upstream_transcript_variant,intron_variant                                      |
| rs886361595 | genic_upstream_transcript_variant,intron_variant                                      |
| rs886371784 | intron_variant                                                                        |
| rs886437993 | intron_variant                                                                        |
| rs886439423 | intron_variant,genic_downstream_transcript_variant                                    |
| rs886446484 | intron_variant                                                                        |
| rs886455405 | genic_upstream_transcript_variant,intron_variant                                      |
| rs886546761 | intron_variant,genic_downstream_transcript_variant                                    |
| rs886566300 | intron_variant                                                                        |
| rs886567640 | intron_variant                                                                        |
| rs886576742 | intron_variant                                                                        |
| rs886581050 | genic_upstream_transcript_variant,intron_variant                                      |
| rs886588667 | 3_prime_UTR_variant,genic_downstream_transcript_variant,non_coding_transcript_variant |
| rs886620822 | intron_variant                                                                        |
| rs886655993 | genic_upstream_transcript_variant,intron_variant                                      |
| rs886671812 | intron_variant                                                                        |
| rs886692105 | intron_variant,genic_downstream_transcript_variant                                    |
| rs886692947 | intron_variant,genic_downstream_transcript_variant                                    |
| rs886791647 | genic_upstream_transcript_variant,intron_variant                                      |
| rs886823911 | genic_upstream_transcript_variant,intron_variant                                      |
| rs886843093 | genic_upstream_transcript_variant,intron_variant                                      |
| rs886903536 | genic_upstream_transcript_variant,intron_variant                                      |
| rs886912063 | intron_variant,genic_downstream_transcript_variant                                    |
| rs886924048 | intron_variant                                                                        |
| rs886992750 | genic_upstream_transcript_variant,intron_variant                                      |
| rs887040547 | intron_variant,genic_downstream_transcript_variant                                    |
| rs887052875 | intron_variant,genic_downstream_transcript_variant                                    |
| rs887057655 | intron_variant                                                                        |
| rs887075884 | genic_upstream_transcript_variant,intron_variant                                      |
| rs887096404 | genic_upstream_transcript_variant,intron_variant                                      |
| rs887101028 | intron_variant                                                                        |
| rs887110929 | intron_variant,genic_downstream_transcript_variant                                    |
| rs887165629 | intron_variant                                                                        |
| rs887176980 | genic_upstream_transcript_variant,intron_variant                                      |
| rs887177657 | genic_upstream_transcript_variant,intron_variant                                      |
| rs887185927 | intron_variant,genic_downstream_transcript_variant                                    |
| rs887209390 | genic_upstream_transcript_variant,intron_variant                                      |
| rs887210701 | genic_upstream_transcript_variant,intron_variant                                      |
| rs887243379 | intron_variant,genic_downstream_transcript_variant                                    |

|             |                                                                                                    |
|-------------|----------------------------------------------------------------------------------------------------|
| rs887253567 | intron_variant                                                                                     |
| rs887272521 | genic_upstream_transcript_variant,intron_variant                                                   |
| rs887300951 | genic_upstream_transcript_variant,intron_variant                                                   |
| rs887333144 | intron_variant                                                                                     |
| rs887387928 | genic_upstream_transcript_variant,intron_variant                                                   |
| rs887445250 | intron_variant,genic_downstream_transcript_variant                                                 |
| rs887456020 | genic_upstream_transcript_variant,intron_variant                                                   |
| rs887482366 | intron_variant                                                                                     |
| rs887508558 | genic_upstream_transcript_variant,intron_variant                                                   |
| rs887545245 | genic_upstream_transcript_variant,intron_variant                                                   |
| rs887580738 | intron_variant                                                                                     |
| rs887587790 | 3_prime_UTR_variant,genic_downstream_transcript_variant,non_coding_transcript_variant              |
| rs887620764 | intron_variant                                                                                     |
| rs887648898 | genic_upstream_transcript_variant,intron_variant,upstream_transcript_variant,2KB_upstream_variant  |
| rs887665984 | intron_variant                                                                                     |
| rs887668431 | genic_upstream_transcript_variant,intron_variant,upstream_transcript_variant,2KB_upstream_variant  |
| rs887677809 | intron_variant                                                                                     |
| rs887683613 | intron_variant,genic_downstream_transcript_variant                                                 |
| rs887691771 | genic_upstream_transcript_variant,intron_variant                                                   |
| rs887752586 | genic_upstream_transcript_variant,intron_variant                                                   |
| rs887798532 | intron_variant                                                                                     |
| rs887837147 | intron_variant,genic_downstream_transcript_variant                                                 |
| rs887838194 | intron_variant                                                                                     |
| rs887845906 | genic_upstream_transcript_variant,intron_variant                                                   |
| rs887868112 | intron_variant,genic_downstream_transcript_variant                                                 |
| rs887869085 | intron_variant                                                                                     |
| rs887897981 | genic_upstream_transcript_variant,intron_variant                                                   |
| rs887899506 | 500B_downstream_variant,downstream_transcript_variant                                              |
| rs887907114 | genic_upstream_transcript_variant,intron_variant                                                   |
| rs887913165 | intron_variant,upstream_transcript_variant,genic_upstream_transcript_variant,2KB_upstream_variant  |
| rs887935416 | genic_upstream_transcript_variant,intron_variant                                                   |
| rs887964113 | intron_variant                                                                                     |
| rs887976119 | genic_upstream_transcript_variant,intron_variant                                                   |
| rs887977560 | intron_variant,upstream_transcript_variant,genic_upstream_transcript_variant,2KB_upstream_variant  |
| rs887999896 | intron_variant                                                                                     |
| rs888054716 | genic_upstream_transcript_variant,intron_variant                                                   |
| rs888054855 | intron_variant,upstream_transcript_variant,genic_upstream_transcript_variant,2KB_upstream_variant  |
| rs888077879 | intron_variant,genic_upstream_transcript_variant,non_coding_transcript_variant,5_prime_UTR_variant |
| rs888088498 | genic_upstream_transcript_variant,intron_variant                                                   |
| rs888105602 | downstream_transcript_variant,intron_variant,genic_downstream_transcript_variant                   |
| rs888108138 | intron_variant                                                                                     |
| rs888147695 | intron_variant,genic_downstream_transcript_variant                                                 |
| rs888179479 | genic_upstream_transcript_variant,intron_variant                                                   |
| rs888272251 | genic_upstream_transcript_variant,intron_variant                                                   |
| rs888287405 | intron_variant                                                                                     |
| rs888303496 | upstream_transcript_variant,intron_variant,genic_upstream_transcript_variant                       |
| rs888370177 | intron_variant                                                                                     |
| rs888382312 | intron_variant,upstream_transcript_variant,genic_upstream_transcript_variant,5_prime_UTR_variant   |
| rs888387477 | genic_upstream_transcript_variant,intron_variant                                                   |
| rs888419274 | intron_variant,genic_downstream_transcript_variant                                                 |
| rs888420076 | intron_variant                                                                                     |
| rs888450154 | intron_variant,genic_downstream_transcript_variant                                                 |
| rs888466820 | genic_upstream_transcript_variant,intron_variant                                                   |
| rs888467672 | genic_upstream_transcript_variant,intron_variant                                                   |
| rs888498754 | genic_upstream_transcript_variant,intron_variant                                                   |
| rs888516366 | intron_variant,genic_downstream_transcript_variant                                                 |
| rs888532449 | genic_upstream_transcript_variant,intron_variant,upstream_transcript_variant,2KB_upstream_variant  |
| rs888563497 | genic_upstream_transcript_variant,intron_variant,upstream_transcript_variant,2KB_upstream_variant  |
| rs888573945 | genic_upstream_transcript_variant,intron_variant                                                   |
| rs888600207 | genic_upstream_transcript_variant,intron_variant                                                   |
| rs888625138 | genic_upstream_transcript_variant,intron_variant                                                   |
| rs888636227 | intron_variant                                                                                     |
| rs888651810 | intron_variant,genic_downstream_transcript_variant                                                 |
| rs888677055 | intron_variant,genic_downstream_transcript_variant                                                 |
| rs888683781 | genic_upstream_transcript_variant,intron_variant                                                   |
| rs888700380 | intron_variant,genic_downstream_transcript_variant                                                 |
| rs888736626 | intron_variant                                                                                     |
| rs888746872 | intron_variant                                                                                     |
| rs888759986 | intron_variant,genic_downstream_transcript_variant                                                 |
| rs888797855 | intron_variant                                                                                     |
| rs888799811 | genic_upstream_transcript_variant,intron_variant                                                   |
| rs888849165 | intron_variant                                                                                     |
| rs888853473 | genic_upstream_transcript_variant,intron_variant                                                   |
| rs888854599 | genic_upstream_transcript_variant,intron_variant                                                   |

|             |                                                                                                   |
|-------------|---------------------------------------------------------------------------------------------------|
| rs888857399 | intron_variant                                                                                    |
| rs888858174 | genic_upstream_transcript_variant,intron_variant                                                  |
| rs888882642 | intron_variant,upstream_transcript_variant,genic_upstream_transcript_variant,2KB_upstream_variant |
| rs888912740 | intron_variant,genic_downstream_transcript_variant                                                |
| rs888926684 | genic_upstream_transcript_variant,intron_variant                                                  |
| rs888940958 | intron_variant                                                                                    |
| rs888994407 | intron_variant                                                                                    |
| rs888997986 | intron_variant                                                                                    |
| rs888999092 | genic_upstream_transcript_variant,intron_variant,upstream_transcript_variant,2KB_upstream_variant |
| rs889017806 | intron_variant,genic_downstream_transcript_variant                                                |
| rs889062723 | intron_variant,genic_downstream_transcript_variant                                                |
| rs889073790 | intron_variant,upstream_transcript_variant,genic_upstream_transcript_variant,2KB_upstream_variant |
| rs889109680 | genic_upstream_transcript_variant,intron_variant                                                  |
| rs889118120 | intron_variant                                                                                    |
| rs889152877 | intron_variant,genic_downstream_transcript_variant                                                |
| rs889210494 | intron_variant,upstream_transcript_variant,genic_upstream_transcript_variant,2KB_upstream_variant |
| rs889222433 | genic_upstream_transcript_variant,intron_variant                                                  |
| rs889231475 | genic_upstream_transcript_variant,intron_variant                                                  |
| rs889256868 | genic_upstream_transcript_variant,intron_variant                                                  |
| rs889266699 | intron_variant                                                                                    |
| rs889337368 | intron_variant                                                                                    |
| rs889399285 | genic_upstream_transcript_variant,intron_variant                                                  |
| rs889411033 | intron_variant                                                                                    |
| rs889431980 | genic_upstream_transcript_variant,intron_variant                                                  |
| rs889443564 | intron_variant                                                                                    |
| rs889451402 | intron_variant                                                                                    |
| rs889452052 | genic_upstream_transcript_variant,intron_variant                                                  |
| rs889502414 | intron_variant                                                                                    |
| rs889506790 | intron_variant                                                                                    |
| rs889559159 | genic_upstream_transcript_variant,intron_variant                                                  |
| rs889570819 | intron_variant                                                                                    |
| rs889583106 | genic_upstream_transcript_variant,intron_variant                                                  |
| rs889595920 | genic_upstream_transcript_variant,intron_variant                                                  |
| rs889613773 | intron_variant                                                                                    |
| rs889669736 | intron_variant                                                                                    |
| rs889698256 | genic_upstream_transcript_variant,intron_variant                                                  |
| rs889734250 | genic_upstream_transcript_variant,intron_variant                                                  |
| rs889765925 | genic_upstream_transcript_variant,intron_variant                                                  |
| rs889784391 | intron_variant,genic_downstream_transcript_variant                                                |
| rs889797752 | genic_upstream_transcript_variant,intron_variant,upstream_transcript_variant,2KB_upstream_variant |
| rs889822185 | intron_variant                                                                                    |
| rs889827718 | genic_upstream_transcript_variant,intron_variant,upstream_transcript_variant,2KB_upstream_variant |
| rs889843839 | intron_variant                                                                                    |
| rs889852846 | intron_variant                                                                                    |
| rs889864266 | genic_upstream_transcript_variant,intron_variant                                                  |
| rs889894529 | intron_variant,genic_downstream_transcript_variant                                                |
| rs889896751 | genic_upstream_transcript_variant,intron_variant                                                  |
| rs889915354 | intron_variant                                                                                    |
| rs889919439 | genic_upstream_transcript_variant,intron_variant                                                  |
| rs889933816 | genic_upstream_transcript_variant,intron_variant                                                  |
| rs889943721 | intron_variant,genic_downstream_transcript_variant                                                |
| rs889959005 | genic_upstream_transcript_variant,intron_variant                                                  |
| rs889991572 | intron_variant                                                                                    |
| rs889992223 | intron_variant,genic_downstream_transcript_variant                                                |
| rs890045963 | intron_variant,genic_downstream_transcript_variant                                                |
| rs890088057 | genic_upstream_transcript_variant,intron_variant                                                  |
| rs890113099 | genic_upstream_transcript_variant,intron_variant                                                  |
| rs890117771 | intron_variant,genic_downstream_transcript_variant                                                |
| rs890171858 | intron_variant                                                                                    |
| rs890173280 | genic_upstream_transcript_variant,intron_variant                                                  |
| rs890175917 | intron_variant                                                                                    |
| rs890178943 | genic_upstream_transcript_variant,intron_variant                                                  |
| rs890221652 | intron_variant,genic_downstream_transcript_variant                                                |
| rs890222039 | genic_upstream_transcript_variant,intron_variant                                                  |
| rs890252723 | intron_variant                                                                                    |
| rs890278002 | intron_variant                                                                                    |
| rs890289845 | genic_upstream_transcript_variant,intron_variant                                                  |
| rs890347972 | 3_prime_UTR_variant,genic_downstream_transcript_variant,non_coding_transcript_variant             |
| rs890403289 | intron_variant                                                                                    |
| rs890404541 | genic_upstream_transcript_variant,intron_variant                                                  |
| rs890429843 | intron_variant,genic_downstream_transcript_variant                                                |
| rs890432270 | intron_variant                                                                                    |
| rs890478435 | upstream_transcript_variant,intron_variant,genic_upstream_transcript_variant                      |
| rs890488793 | genic_upstream_transcript_variant,intron_variant                                                  |

|              |                                                                                                    |
|--------------|----------------------------------------------------------------------------------------------------|
| rs890516324  | genic_upstream_transcript_variant,intron_variant                                                   |
| rs890519904  | intron_variant,genic_downstream_transcript_variant                                                 |
| rs890541365  | genic_upstream_transcript_variant,intron_variant                                                   |
| rs890555557  | intron_variant,genic_upstream_transcript_variant,non_coding_transcript_variant,5_prime_UTR_variant |
| rs890569259  | genic_upstream_transcript_variant,intron_variant                                                   |
| rs890595991  | intron_variant,genic_downstream_transcript_variant                                                 |
| rs890643346  | intron_variant                                                                                     |
| rs890656470  | intron_variant,genic_downstream_transcript_variant                                                 |
| rs890662930  | intron_variant                                                                                     |
| rs8906711010 | intron_variant                                                                                     |
| rs890677955  | intron_variant                                                                                     |
| rs890683176  | genic_upstream_transcript_variant,intron_variant                                                   |
| rs890684616  | intron_variant,genic_downstream_transcript_variant                                                 |
| rs890690376  | genic_upstream_transcript_variant,intron_variant                                                   |
| rs890747495  | intron_variant,genic_downstream_transcript_variant                                                 |
| rs890798182  | intron_variant                                                                                     |
| rs890810332  | genic_upstream_transcript_variant,intron_variant                                                   |
| rs890833905  | genic_upstream_transcript_variant,intron_variant                                                   |
| rs890905093  | genic_upstream_transcript_variant,intron_variant                                                   |
| rs890925095  | genic_upstream_transcript_variant,intron_variant                                                   |
| rs890942044  | intron_variant                                                                                     |
| rs890962514  | intron_variant                                                                                     |
| rs890992365  | intron_variant                                                                                     |
| rs890999910  | intron_variant,genic_downstream_transcript_variant                                                 |
| rs891013667  | genic_upstream_transcript_variant,intron_variant                                                   |
| rs891014955  | intron_variant,genic_downstream_transcript_variant                                                 |
| rs891016314  | intron_variant                                                                                     |
| rs891016495  | intron_variant                                                                                     |
| rs891025262  | intron_variant,genic_downstream_transcript_variant                                                 |
| rs891026993  | genic_upstream_transcript_variant,intron_variant                                                   |
| rs891088493  | genic_upstream_transcript_variant,intron_variant                                                   |
| rs891099852  | genic_upstream_transcript_variant,intron_variant                                                   |
| rs891147991  | genic_upstream_transcript_variant,intron_variant                                                   |
| rs891182363  | intron_variant                                                                                     |
| rs891196809  | genic_upstream_transcript_variant,intron_variant                                                   |
| rs891198886  | intron_variant                                                                                     |
| rs891250779  | genic_upstream_transcript_variant,intron_variant                                                   |
| rs891266803  | intron_variant                                                                                     |
| rs891327100  | genic_upstream_transcript_variant,intron_variant                                                   |
| rs891333383  | genic_upstream_transcript_variant,intron_variant                                                   |
| rs891334937  | intron_variant                                                                                     |
| rs891405668  | intron_variant,genic_downstream_transcript_variant                                                 |
| rs891435131  | intron_variant,genic_downstream_transcript_variant                                                 |
| rs891436599  | intron_variant                                                                                     |
| rs891459978  | genic_upstream_transcript_variant,intron_variant                                                   |
| rs891471383  | genic_upstream_transcript_variant,intron_variant                                                   |
| rs891473588  | intron_variant                                                                                     |
| rs891521372  | intron_variant,genic_downstream_transcript_variant                                                 |
| rs891523396  | intron_variant                                                                                     |
| rs891549159  | genic_upstream_transcript_variant,intron_variant                                                   |
| rs891588063  | genic_upstream_transcript_variant,intron_variant                                                   |
| rs891610964  | genic_upstream_transcript_variant,intron_variant                                                   |
| rs891623260  | intron_variant                                                                                     |
| rs891634935  | coding_sequence_variant,missense_variant,non_coding_transcript_variant                             |
| rs891641030  | genic_upstream_transcript_variant,intron_variant                                                   |
| rs891679501  | genic_upstream_transcript_variant,intron_variant                                                   |
| rs891701280  | genic_upstream_transcript_variant,intron_variant                                                   |
| rs891730580  | intron_variant                                                                                     |
| rs891737446  | intron_variant,genic_downstream_transcript_variant                                                 |
| rs891755369  | genic_upstream_transcript_variant,intron_variant                                                   |
| rs891769620  | genic_upstream_transcript_variant,intron_variant                                                   |
| rs891805785  | intron_variant                                                                                     |
| rs891838671  | intron_variant                                                                                     |
| rs891844831  | intron_variant                                                                                     |
| rs891867356  | genic_upstream_transcript_variant,intron_variant                                                   |
| rs891880304  | genic_upstream_transcript_variant,intron_variant                                                   |
| rs891898944  | intron_variant                                                                                     |
| rs891933826  | intron_variant,genic_downstream_transcript_variant                                                 |
| rs891935155  | genic_upstream_transcript_variant,intron_variant                                                   |
| rs891947642  | intron_variant                                                                                     |
| rs891952782  | intron_variant                                                                                     |
| rs892008629  | genic_upstream_transcript_variant,intron_variant                                                   |
| rs892108517  | genic_upstream_transcript_variant,intron_variant                                                   |
| rs892169924  | intron_variant                                                                                     |

|             |                                                                                                   |
|-------------|---------------------------------------------------------------------------------------------------|
| rs892211396 | genic_upstream_transcript_variant,intron_variant                                                  |
| rs892266201 | intron_variant,genic_downstream_transcript_variant                                                |
| rs892285217 | intron_variant,5_prime_UTR_variant                                                                |
| rs892285465 | intron_variant                                                                                    |
| rs892289772 | coding_sequence_variant,intron_variant,missense_variant                                           |
| rs892331789 | upstream_transcript_variant,intron_variant,genic_upstream_transcript_variant                      |
| rs892377399 | downstream_transcript_variant,intron_variant,genic_downstream_transcript_variant                  |
| rs892407154 | intron_variant,genic_downstream_transcript_variant                                                |
| rs892425911 | intron_variant                                                                                    |
| rs892441506 | 3_prime_UTR_variant,genic_downstream_transcript_variant,non_coding_transcript_variant             |
| rs892473594 | intron_variant                                                                                    |
| rs892474045 | 3_prime_UTR_variant,genic_downstream_transcript_variant,non_coding_transcript_variant             |
| rs892515817 | genic_upstream_transcript_variant,intron_variant                                                  |
| rs892532055 | intron_variant                                                                                    |
| rs892542970 | intron_variant,genic_downstream_transcript_variant                                                |
| rs892605220 | genic_upstream_transcript_variant,intron_variant                                                  |
| rs892691547 | intron_variant                                                                                    |
| rs892711157 | intron_variant,genic_downstream_transcript_variant                                                |
| rs892724202 | intron_variant,genic_downstream_transcript_variant                                                |
| rs892749172 | genic_upstream_transcript_variant,intron_variant,upstream_transcript_variant,2KB_upstream_variant |
| rs892802075 | genic_upstream_transcript_variant,intron_variant                                                  |
| rs892858706 | intron_variant                                                                                    |
| rs892861856 | 3_prime_UTR_variant,genic_downstream_transcript_variant,non_coding_transcript_variant             |
| rs892871218 | intron_variant,genic_downstream_transcript_variant                                                |
| rs892910259 | genic_upstream_transcript_variant,intron_variant                                                  |
| rs892911514 | intron_variant                                                                                    |
| rs892921324 | intron_variant                                                                                    |
| rs892943505 | genic_upstream_transcript_variant,intron_variant                                                  |
| rs892946152 | genic_upstream_transcript_variant,intron_variant                                                  |
| rs892977948 | genic_upstream_transcript_variant,intron_variant                                                  |
| rs893001173 | intron_variant                                                                                    |
| rs893025943 | genic_upstream_transcript_variant,intron_variant                                                  |
| rs893026003 | intron_variant                                                                                    |
| rs893030103 | intron_variant,genic_downstream_transcript_variant                                                |
| rs893093238 | genic_upstream_transcript_variant,intron_variant                                                  |
| rs893111523 | intron_variant                                                                                    |
| rs893138184 | genic_upstream_transcript_variant,intron_variant                                                  |
| rs893196174 | intron_variant                                                                                    |
| rs893201827 | intron_variant,genic_downstream_transcript_variant                                                |
| rs893205485 | intron_variant                                                                                    |
| rs893207545 | intron_variant,genic_downstream_transcript_variant                                                |
| rs893209864 | genic_upstream_transcript_variant,intron_variant                                                  |
| rs893249038 | intron_variant,genic_downstream_transcript_variant                                                |
| rs893256157 | intron_variant                                                                                    |
| rs893281106 | genic_upstream_transcript_variant,intron_variant                                                  |
| rs893303218 | intron_variant,genic_downstream_transcript_variant                                                |
| rs893349124 | genic_upstream_transcript_variant,intron_variant                                                  |
| rs893390307 | genic_upstream_transcript_variant,intron_variant                                                  |
| rs893409118 | intron_variant,genic_downstream_transcript_variant                                                |
| rs893410600 | intron_variant,genic_downstream_transcript_variant                                                |
| rs893414311 | intron_variant                                                                                    |
| rs893419769 | genic_upstream_transcript_variant,intron_variant                                                  |
| rs893423433 | intron_variant                                                                                    |
| rs893478593 | 500B_downstream_variant,downstream_transcript_variant                                             |
| rs893484454 | intron_variant                                                                                    |
| rs893539368 | genic_upstream_transcript_variant,intron_variant                                                  |
| rs893540344 | intron_variant                                                                                    |
| rs893551535 | intron_variant,genic_downstream_transcript_variant                                                |
| rs893559509 | genic_upstream_transcript_variant,intron_variant                                                  |
| rs893627786 | intron_variant,genic_downstream_transcript_variant                                                |
| rs893631480 | genic_upstream_transcript_variant,intron_variant                                                  |
| rs893724651 | intron_variant                                                                                    |
| rs893737485 | intron_variant                                                                                    |
| rs893754828 | genic_upstream_transcript_variant,intron_variant,upstream_transcript_variant,2KB_upstream_variant |
| rs893784444 | intron_variant,genic_downstream_transcript_variant                                                |
| rs893800782 | genic_upstream_transcript_variant,intron_variant                                                  |
| rs893806462 | intron_variant                                                                                    |
| rs893807592 | intron_variant                                                                                    |
| rs893808973 | genic_upstream_transcript_variant,intron_variant                                                  |
| rs893831772 | genic_upstream_transcript_variant,intron_variant                                                  |
| rs893842563 | intron_variant,upstream_transcript_variant,genic_upstream_transcript_variant,2KB_upstream_variant |
| rs893842717 | genic_upstream_transcript_variant,intron_variant                                                  |
| rs893884267 | genic_upstream_transcript_variant,intron_variant                                                  |
| rs893888476 | intron_variant                                                                                    |

|             |                                                                                                   |
|-------------|---------------------------------------------------------------------------------------------------|
| rs893925429 | genic_upstream_transcript_variant,intron_variant                                                  |
| rs893937972 | intron_variant,genic_downstream_transcript_variant                                                |
| rs893967059 | intron_variant                                                                                    |
| rs893997368 | intron_variant                                                                                    |
| rs894007064 | intron_variant                                                                                    |
| rs894016433 | intron_variant                                                                                    |
| rs894017077 | genic_upstream_transcript_variant,intron_variant                                                  |
| rs894046551 | genic_upstream_transcript_variant,intron_variant                                                  |
| rs894047114 | intron_variant,genic_downstream_transcript_variant                                                |
| rs894098921 | genic_upstream_transcript_variant,intron_variant                                                  |
| rs894131911 | intron_variant                                                                                    |
| rs894134423 | genic_upstream_transcript_variant,intron_variant                                                  |
| rs894150896 | intron_variant                                                                                    |
| rs894167708 | genic_upstream_transcript_variant,intron_variant                                                  |
| rs894191835 | intron_variant                                                                                    |
| rs894208993 | genic_upstream_transcript_variant,intron_variant                                                  |
| rs894239676 | intron_variant,genic_downstream_transcript_variant                                                |
| rs894272365 | genic_upstream_transcript_variant,intron_variant                                                  |
| rs894285626 | intron_variant                                                                                    |
| rs894346103 | genic_upstream_transcript_variant,intron_variant                                                  |
| rs894348881 | intron_variant                                                                                    |
| rs894381885 | intron_variant                                                                                    |
| rs894422930 | genic_upstream_transcript_variant,intron_variant                                                  |
| rs894445685 | intron_variant,genic_downstream_transcript_variant                                                |
| rs894455729 | intron_variant                                                                                    |
| rs894485658 | intron_variant,genic_downstream_transcript_variant                                                |
| rs894520288 | genic_upstream_transcript_variant,intron_variant                                                  |
| rs894555822 | intron_variant,genic_downstream_transcript_variant                                                |
| rs894564102 | intron_variant                                                                                    |
| rs894576616 | intron_variant                                                                                    |
| rs894584478 | genic_upstream_transcript_variant,intron_variant                                                  |
| rs894608084 | intron_variant,genic_downstream_transcript_variant                                                |
| rs894644335 | intron_variant                                                                                    |
| rs894655844 | intron_variant                                                                                    |
| rs894694888 | intron_variant                                                                                    |
| rs894705079 | intron_variant                                                                                    |
| rs894714927 | intron_variant,genic_downstream_transcript_variant                                                |
| rs894724273 | genic_upstream_transcript_variant,intron_variant                                                  |
| rs894736877 | intron_variant                                                                                    |
| rs894748151 | intron_variant,genic_downstream_transcript_variant                                                |
| rs894756897 | genic_upstream_transcript_variant,intron_variant                                                  |
| rs894788991 | intron_variant                                                                                    |
| rs894790011 | genic_upstream_transcript_variant,intron_variant                                                  |
| rs894796748 | intron_variant                                                                                    |
| rs894814577 | intron_variant,genic_downstream_transcript_variant                                                |
| rs894857863 | intron_variant                                                                                    |
| rs894863976 | genic_upstream_transcript_variant,intron_variant                                                  |
| rs894885981 | intron_variant                                                                                    |
| rs894892909 | intron_variant,genic_downstream_transcript_variant                                                |
| rs894903119 | intron_variant                                                                                    |
| rs894911498 | intron_variant                                                                                    |
| rs894929695 | genic_upstream_transcript_variant,intron_variant                                                  |
| rs894943535 | intron_variant,genic_downstream_transcript_variant                                                |
| rs895025402 | genic_upstream_transcript_variant,intron_variant,upstream_transcript_variant,2KB_upstream_variant |
| rs895077470 | genic_upstream_transcript_variant,intron_variant                                                  |
| rs895079900 | intron_variant,genic_downstream_transcript_variant                                                |
| rs895087563 | intron_variant                                                                                    |
| rs895114198 | intron_variant,upstream_transcript_variant,genic_upstream_transcript_variant,2KB_upstream_variant |
| rs895136433 | intron_variant                                                                                    |
| rs895166228 | intron_variant                                                                                    |
| rs895215214 | genic_upstream_transcript_variant,intron_variant                                                  |
| rs895219814 | intron_variant,upstream_transcript_variant,genic_upstream_transcript_variant,2KB_upstream_variant |
| rs895259251 | intron_variant                                                                                    |
| rs895285218 | intron_variant,genic_upstream_transcript_variant                                                  |
| rs895331717 | intron_variant                                                                                    |
| rs895350231 | intron_variant,genic_upstream_transcript_variant                                                  |
| rs895376991 | intron_variant,genic_upstream_transcript_variant                                                  |
| rs895386147 | intron_variant                                                                                    |
| rs895391980 | intron_variant,genic_upstream_transcript_variant                                                  |
| rs895395329 | intron_variant,genic_upstream_transcript_variant                                                  |
| rs895429755 | intron_variant,genic_upstream_transcript_variant,2KB_upstream_variant,upstream_transcript_variant |
| rs895430655 | intron_variant                                                                                    |
| rs895450021 | intron_variant                                                                                    |
| rs895458479 | intron_variant,genic_downstream_transcript_variant                                                |

|             |                                                                                                    |
|-------------|----------------------------------------------------------------------------------------------------|
| rs895487842 | intron_variant,genic_downstream_transcript_variant                                                 |
| rs895514304 | intron_variant,genic_upstream_transcript_variant                                                   |
| rs895518432 | intron_variant,genic_upstream_transcript_variant                                                   |
| rs895518635 | intron_variant                                                                                     |
| rs895557219 | intron_variant,genic_upstream_transcript_variant,2KB_upstream_variant,upstream_transcript_variant  |
| rs895558647 | intron_variant,genic_downstream_transcript_variant                                                 |
| rs895566383 | intron_variant,genic_upstream_transcript_variant                                                   |
| rs895578036 | intron_variant                                                                                     |
| rs895601156 | intron_variant                                                                                     |
| rs895601318 | intron_variant,genic_upstream_transcript_variant                                                   |
| rs895636369 | intron_variant                                                                                     |
| rs895683840 | intron_variant,genic_upstream_transcript_variant                                                   |
| rs895688266 | intron_variant,genic_upstream_transcript_variant,upstream_transcript_variant                       |
| rs895688428 | intron_variant                                                                                     |
| rs895714991 | intron_variant,genic_downstream_transcript_variant                                                 |
| rs895729345 | intron_variant                                                                                     |
| rs895730756 | intron_variant,genic_upstream_transcript_variant                                                   |
| rs895749698 | intron_variant,genic_upstream_transcript_variant,upstream_transcript_variant                       |
| rs895751445 | intron_variant                                                                                     |
| rs895761828 | intron_variant,genic_upstream_transcript_variant                                                   |
| rs895804602 | intron_variant,genic_downstream_transcript_variant                                                 |
| rs895827393 | intron_variant,genic_upstream_transcript_variant                                                   |
| rs895832805 | intron_variant                                                                                     |
| rs895838237 | intron_variant,genic_upstream_transcript_variant                                                   |
| rs895957282 | intron_variant                                                                                     |
| rs895962097 | intron_variant                                                                                     |
| rs895989726 | intron_variant                                                                                     |
| rs896001999 | intron_variant,genic_upstream_transcript_variant                                                   |
| rs896056241 | intron_variant                                                                                     |
| rs896056683 | intron_variant                                                                                     |
| rs896118975 | intron_variant,genic_upstream_transcript_variant                                                   |
| rs896122967 | intron_variant                                                                                     |
| rs896152858 | intron_variant,genic_upstream_transcript_variant                                                   |
| rs896160892 | intron_variant                                                                                     |
| rs896162725 | intron_variant,genic_upstream_transcript_variant                                                   |
| rs896171399 | intron_variant,genic_upstream_transcript_variant                                                   |
| rs896288143 | intron_variant,genic_upstream_transcript_variant                                                   |
| rs896292491 | intron_variant                                                                                     |
| rs896294593 | intron_variant,genic_upstream_transcript_variant                                                   |
| rs896302251 | intron_variant                                                                                     |
| rs896330128 | intron_variant,genic_upstream_transcript_variant                                                   |
| rs896377607 | intron_variant,genic_upstream_transcript_variant                                                   |
| rs896391898 | intron_variant,genic_upstream_transcript_variant                                                   |
| rs896444215 | intron_variant,genic_upstream_transcript_variant                                                   |
| rs896464611 | intron_variant                                                                                     |
| rs896473526 | intron_variant                                                                                     |
| rs896530720 | intron_variant,genic_downstream_transcript_variant                                                 |
| rs896532175 | intron_variant,genic_downstream_transcript_variant                                                 |
| rs896533829 | intron_variant,genic_upstream_transcript_variant                                                   |
| rs896570514 | intron_variant,genic_downstream_transcript_variant                                                 |
| rs896577259 | intron_variant,genic_upstream_transcript_variant                                                   |
| rs896630434 | intron_variant,genic_upstream_transcript_variant                                                   |
| rs896632067 | intron_variant,genic_upstream_transcript_variant                                                   |
| rs896669386 | intron_variant,genic_downstream_transcript_variant                                                 |
| rs896689895 | intron_variant,genic_upstream_transcript_variant                                                   |
| rs896697588 | intron_variant,genic_upstream_transcript_variant                                                   |
| rs896701995 | intron_variant                                                                                     |
| rs896704960 | intron_variant,genic_upstream_transcript_variant                                                   |
| rs896788906 | intron_variant,genic_upstream_transcript_variant                                                   |
| rs896888530 | intron_variant,genic_downstream_transcript_variant                                                 |
| rs896888575 | intron_variant,genic_upstream_transcript_variant                                                   |
| rs896935661 | intron_variant,genic_upstream_transcript_variant                                                   |
| rs896936526 | intron_variant,genic_upstream_transcript_variant                                                   |
| rs896965610 | intron_variant,genic_upstream_transcript_variant                                                   |
| rs896985799 | intron_variant,genic_upstream_transcript_variant                                                   |
| rs897018734 | intron_variant                                                                                     |
| rs897063794 | non_coding_transcript_variant,genic_upstream_transcript_variant,intron_variant,5_prime_UTR_variant |
| rs897088643 | intron_variant,genic_upstream_transcript_variant                                                   |
| rs897090701 | intron_variant                                                                                     |
| rs897137527 | intron_variant,genic_upstream_transcript_variant                                                   |
| rs897162448 | intron_variant,genic_upstream_transcript_variant                                                   |
| rs897183475 | intron_variant                                                                                     |
| rs897327219 | intron_variant                                                                                     |
| rs897341364 | intron_variant                                                                                     |

|             |                                                                                                   |
|-------------|---------------------------------------------------------------------------------------------------|
| rs897391460 | intron_variant                                                                                    |
| rs897400319 | intron_variant,genic_downstream_transcript_variant                                                |
| rs897431331 | intron_variant                                                                                    |
| rs897435995 | intron_variant,genic_downstream_transcript_variant                                                |
| rs897443690 | intron_variant                                                                                    |
| rs897455077 | intron_variant                                                                                    |
| rs897470722 | intron_variant,genic_upstream_transcript_variant                                                  |
| rs897488227 | intron_variant,genic_downstream_transcript_variant                                                |
| rs897490087 | intron_variant                                                                                    |
| rs897507479 | intron_variant                                                                                    |
| rs897509622 | intron_variant,genic_upstream_transcript_variant                                                  |
| rs897610938 | intron_variant                                                                                    |
| rs897618119 | intron_variant,genic_upstream_transcript_variant                                                  |
| rs897626316 | intron_variant,genic_upstream_transcript_variant                                                  |
| rs897627566 | intron_variant,genic_upstream_transcript_variant                                                  |
| rs897715832 | intron_variant                                                                                    |
| rs897744319 | intron_variant,genic_downstream_transcript_variant                                                |
| rs897751212 | intron_variant                                                                                    |
| rs897768864 | intron_variant,genic_downstream_transcript_variant                                                |
| rs897806829 | intron_variant                                                                                    |
| rs897812678 | intron_variant                                                                                    |
| rs897820211 | intron_variant,genic_downstream_transcript_variant                                                |
| rs897860647 | intron_variant                                                                                    |
| rs897867962 | intron_variant,genic_upstream_transcript_variant                                                  |
| rs897872000 | intron_variant,genic_upstream_transcript_variant,upstream_transcript_variant                      |
| rs897891127 | intron_variant,genic_upstream_transcript_variant                                                  |
| rs897929540 | intron_variant,genic_upstream_transcript_variant,upstream_transcript_variant                      |
| rs897931699 | intron_variant,genic_upstream_transcript_variant                                                  |
| rs897976413 | intron_variant                                                                                    |
| rs897999558 | intron_variant                                                                                    |
| rs898004083 | intron_variant,genic_upstream_transcript_variant                                                  |
| rs898021431 | intron_variant,genic_upstream_transcript_variant,2KB_upstream_variant,upstream_transcript_variant |
| rs898054287 | intron_variant                                                                                    |
| rs898147486 | intron_variant                                                                                    |
| rs898158515 | intron_variant,genic_downstream_transcript_variant                                                |
| rs898175177 | intron_variant,genic_upstream_transcript_variant                                                  |
| rs898267104 | intron_variant,genic_upstream_transcript_variant                                                  |
| rs898279202 | intron_variant                                                                                    |
| rs898283368 | intron_variant,genic_upstream_transcript_variant                                                  |
| rs898294039 | intron_variant,genic_upstream_transcript_variant                                                  |
| rs898299642 | intron_variant,genic_downstream_transcript_variant                                                |
| rs898323747 | intron_variant                                                                                    |
| rs898371833 | intron_variant,genic_downstream_transcript_variant                                                |
| rs898399998 | intron_variant                                                                                    |
| rs898414133 | intron_variant,genic_upstream_transcript_variant                                                  |
| rs898433248 | intron_variant,genic_downstream_transcript_variant                                                |
| rs898506034 | intron_variant,genic_upstream_transcript_variant                                                  |
| rs898531139 | intron_variant                                                                                    |
| rs898537401 | intron_variant,genic_downstream_transcript_variant                                                |
| rs898554650 | intron_variant                                                                                    |
| rs898557340 | intron_variant,genic_upstream_transcript_variant                                                  |
| rs898588297 | intron_variant,genic_downstream_transcript_variant                                                |
| rs898625183 | intron_variant                                                                                    |
| rs898628477 | intron_variant,genic_upstream_transcript_variant                                                  |
| rs898663810 | intron_variant                                                                                    |
| rs898666331 | intron_variant,genic_upstream_transcript_variant                                                  |
| rs898698321 | intron_variant,genic_upstream_transcript_variant                                                  |
| rs898719692 | intron_variant                                                                                    |
| rs898764682 | intron_variant,genic_upstream_transcript_variant                                                  |
| rs898772854 | intron_variant                                                                                    |
| rs898808142 | intron_variant,genic_upstream_transcript_variant                                                  |
| rs898856273 | intron_variant,genic_downstream_transcript_variant                                                |
| rs898932029 | intron_variant,genic_upstream_transcript_variant                                                  |
| rs898999778 | intron_variant,genic_upstream_transcript_variant                                                  |
| rs899029898 | intron_variant,genic_upstream_transcript_variant                                                  |
| rs899055574 | intron_variant                                                                                    |
| rs899082939 | intron_variant,genic_upstream_transcript_variant                                                  |
| rs899088190 | intron_variant                                                                                    |
| rs899105485 | intron_variant,genic_upstream_transcript_variant                                                  |
| rs899128677 | intron_variant                                                                                    |
| rs899183061 | intron_variant,genic_upstream_transcript_variant                                                  |
| rs899240957 | intron_variant,genic_downstream_transcript_variant                                                |
| rs899271927 | intron_variant,genic_downstream_transcript_variant                                                |
| rs899278962 | intron_variant,genic_upstream_transcript_variant                                                  |

|             |                                                                                                                           |
|-------------|---------------------------------------------------------------------------------------------------------------------------|
| rs899291261 | intron_variant,genic_upstream_transcript_variant                                                                          |
| rs899302009 | intron_variant                                                                                                            |
| rs899307459 | intron_variant,genic_upstream_transcript_variant                                                                          |
| rs899339823 | intron_variant,genic_upstream_transcript_variant                                                                          |
| rs899363561 | intron_variant                                                                                                            |
| rs899364998 | intron_variant,genic_downstream_transcript_variant                                                                        |
| rs899418615 | intron_variant,genic_downstream_transcript_variant                                                                        |
| rs899424650 | 3_prime_UTR_variant,non_coding_transcript_variant,genic_downstream_transcript_variant                                     |
| rs899501593 | intron_variant                                                                                                            |
| rs899507118 | intron_variant,genic_downstream_transcript_variant,downstream_transcript_variant                                          |
| rs899518261 | intron_variant,genic_upstream_transcript_variant                                                                          |
| rs899569508 | synonymous_variant,coding_sequence_variant,genic_upstream_transcript_variant,non_coding_transcript_variant,intron_variant |
| rs899571662 | intron_variant,genic_upstream_transcript_variant                                                                          |
| rs899576456 | intron_variant                                                                                                            |
| rs899610698 | intron_variant,genic_upstream_transcript_variant                                                                          |
| rs899641729 | intron_variant,genic_downstream_transcript_variant                                                                        |
| rs899652025 | intron_variant                                                                                                            |
| rs899656436 | intron_variant,genic_upstream_transcript_variant                                                                          |
| rs899662107 | intron_variant,genic_upstream_transcript_variant                                                                          |
| rs899668490 | intron_variant,genic_downstream_transcript_variant                                                                        |
| rs899693263 | intron_variant,genic_upstream_transcript_variant                                                                          |
| rs899713873 | intron_variant,genic_downstream_transcript_variant                                                                        |
| rs899742969 | intron_variant                                                                                                            |
| rs899754998 | intron_variant                                                                                                            |
| rs899773615 | intron_variant,genic_downstream_transcript_variant                                                                        |
| rs899790345 | intron_variant,genic_upstream_transcript_variant                                                                          |
| rs899794247 | intron_variant,genic_upstream_transcript_variant                                                                          |
| rs899860623 | intron_variant                                                                                                            |
| rs899910016 | intron_variant                                                                                                            |
| rs899935863 | intron_variant,genic_upstream_transcript_variant                                                                          |
| rs899964049 | intron_variant                                                                                                            |
| rs900006049 | intron_variant,genic_upstream_transcript_variant                                                                          |
| rs900015366 | intron_variant                                                                                                            |
| rs900017008 | intron_variant                                                                                                            |
| rs900048387 | intron_variant                                                                                                            |
| rs900125386 | intron_variant,genic_upstream_transcript_variant                                                                          |
| rs900163055 | intron_variant                                                                                                            |
| rs900170028 | intron_variant,genic_upstream_transcript_variant                                                                          |
| rs900192245 | intron_variant                                                                                                            |
| rs900210693 | 3_prime_UTR_variant,non_coding_transcript_variant,genic_downstream_transcript_variant                                     |
| rs900290843 | intron_variant,genic_upstream_transcript_variant                                                                          |
| rs900324263 | intron_variant                                                                                                            |
| rs900348407 | intron_variant,genic_upstream_transcript_variant                                                                          |
| rs900355310 | intron_variant                                                                                                            |
| rs900401385 | intron_variant,genic_upstream_transcript_variant                                                                          |
| rs900440143 | intron_variant,genic_upstream_transcript_variant,2KB_upstream_variant,upstream_transcript_variant                         |
| rs900440967 | intron_variant                                                                                                            |
| rs900451980 | intron_variant,genic_upstream_transcript_variant                                                                          |
| rs900452351 | intron_variant                                                                                                            |
| rs900481885 | intron_variant,genic_upstream_transcript_variant                                                                          |
| rs900514028 | intron_variant                                                                                                            |
| rs900524496 | intron_variant,genic_downstream_transcript_variant                                                                        |
| rs900572051 | intron_variant,genic_downstream_transcript_variant                                                                        |
| rs900602771 | intron_variant,genic_downstream_transcript_variant                                                                        |
| rs900606479 | intron_variant,genic_upstream_transcript_variant                                                                          |
| rs900608849 | intron_variant                                                                                                            |
| rs900654174 | intron_variant                                                                                                            |
| rs900709168 | intron_variant                                                                                                            |
| rs900716689 | intron_variant,genic_downstream_transcript_variant                                                                        |
| rs90072316  | intron_variant,genic_downstream_transcript_variant                                                                        |
| rs900776907 | intron_variant                                                                                                            |
| rs900817628 | intron_variant,genic_upstream_transcript_variant                                                                          |
| rs900825728 | intron_variant,genic_downstream_transcript_variant                                                                        |
| rs900833348 | intron_variant                                                                                                            |
| rs900849971 | intron_variant,genic_upstream_transcript_variant                                                                          |
| rs900858371 | intron_variant,genic_downstream_transcript_variant                                                                        |
| rs900859752 | intron_variant,genic_downstream_transcript_variant                                                                        |
| rs900885021 | intron_variant                                                                                                            |
| rs900894305 | intron_variant,genic_upstream_transcript_variant                                                                          |
| rs900979731 | intron_variant,genic_upstream_transcript_variant                                                                          |
| rs901007056 | intron_variant,genic_upstream_transcript_variant                                                                          |
| rs901022467 | intron_variant                                                                                                            |
| rs901031881 | intron_variant,genic_upstream_transcript_variant                                                                          |
| rs901043345 | intron_variant,genic_upstream_transcript_variant,2KB_upstream_variant,upstream_transcript_variant                         |

|             |                                                                                                   |
|-------------|---------------------------------------------------------------------------------------------------|
| rs901089773 | intron_variant,genic_downstream_transcript_variant                                                |
| rs901124250 | intron_variant                                                                                    |
| rs901183200 | intron_variant,genic_downstream_transcript_variant                                                |
| rs901189268 | intron_variant,genic_upstream_transcript_variant,2KB_upstream_variant,upstream_transcript_variant |
| rs901198338 | intron_variant                                                                                    |
| rs901207191 | intron_variant                                                                                    |
| rs901242451 | intron_variant,genic_downstream_transcript_variant                                                |
| rs901245956 | intron_variant,genic_upstream_transcript_variant                                                  |
| rs901246074 | intron_variant,genic_upstream_transcript_variant                                                  |
| rs901261281 | intron_variant                                                                                    |
| rs901261630 | intron_variant,genic_upstream_transcript_variant                                                  |
| rs901277205 | intron_variant,genic_upstream_transcript_variant                                                  |
| rs901317043 | intron_variant,genic_upstream_transcript_variant                                                  |
| rs901336465 | intron_variant,genic_upstream_transcript_variant,2KB_upstream_variant,upstream_transcript_variant |
| rs901348543 | intron_variant,genic_upstream_transcript_variant                                                  |
| rs901366158 | intron_variant,genic_upstream_transcript_variant,2KB_upstream_variant,upstream_transcript_variant |
| rs901378121 | intron_variant                                                                                    |
| rs901382244 | intron_variant,genic_downstream_transcript_variant                                                |
| rs901391802 | intron_variant,genic_downstream_transcript_variant                                                |
| rs901421211 | intron_variant,genic_upstream_transcript_variant                                                  |
| rs901428552 | intron_variant,genic_upstream_transcript_variant                                                  |
| rs901437377 | intron_variant                                                                                    |
| rs901480936 | intron_variant,genic_downstream_transcript_variant                                                |
| rs901501300 | intron_variant                                                                                    |
| rs901505996 | intron_variant,genic_downstream_transcript_variant                                                |
| rs901536116 | intron_variant                                                                                    |
| rs901556439 | intron_variant,genic_upstream_transcript_variant                                                  |
| rs901572810 | intron_variant,genic_downstream_transcript_variant                                                |
| rs901586899 | intron_variant                                                                                    |
| rs901589784 | intron_variant,genic_upstream_transcript_variant                                                  |
| rs901607487 | intron_variant,genic_upstream_transcript_variant                                                  |
| rs901609817 | intron_variant                                                                                    |
| rs901619953 | intron_variant,genic_upstream_transcript_variant,2KB_upstream_variant,upstream_transcript_variant |
| rs901647513 | intron_variant,genic_upstream_transcript_variant                                                  |
| rs901661095 | intron_variant                                                                                    |
| rs901676247 | intron_variant                                                                                    |
| rs901678598 | intron_variant,genic_upstream_transcript_variant                                                  |
| rs901711970 | intron_variant                                                                                    |
| rs901717326 | intron_variant,genic_downstream_transcript_variant                                                |
| rs901725755 | intron_variant,genic_downstream_transcript_variant                                                |
| rs901736812 | intron_variant,genic_upstream_transcript_variant                                                  |
| rs901765923 | intron_variant,genic_upstream_transcript_variant                                                  |
| rs901778019 | intron_variant,genic_downstream_transcript_variant                                                |
| rs901844506 | intron_variant                                                                                    |
| rs901865131 | intron_variant,genic_upstream_transcript_variant                                                  |
| rs901913069 | intron_variant,genic_upstream_transcript_variant                                                  |
| rs901922058 | intron_variant                                                                                    |
| rs901963499 | 3_prime_UTR_variant,non_coding_transcript_variant,genic_downstream_transcript_variant             |
| rs901963783 | intron_variant,genic_upstream_transcript_variant                                                  |
| rs901964224 | intron_variant,genic_upstream_transcript_variant                                                  |
| rs901975889 | intron_variant                                                                                    |
| rs902001994 | intron_variant,genic_upstream_transcript_variant                                                  |
| rs902013283 | 3_prime_UTR_variant,non_coding_transcript_variant,genic_downstream_transcript_variant             |
| rs902085081 | intron_variant,genic_upstream_transcript_variant,2KB_upstream_variant,upstream_transcript_variant |
| rs902086015 | intron_variant,genic_downstream_transcript_variant                                                |
| rs902092978 | intron_variant                                                                                    |
| rs902103215 | intron_variant                                                                                    |
| rs902115606 | intron_variant,genic_upstream_transcript_variant,2KB_upstream_variant,upstream_transcript_variant |
| rs902118572 | intron_variant,genic_downstream_transcript_variant                                                |
| rs902129100 | intron_variant                                                                                    |
| rs902138043 | intron_variant,genic_upstream_transcript_variant                                                  |
| rs902173545 | intron_variant,genic_upstream_transcript_variant,2KB_upstream_variant,upstream_transcript_variant |
| rs902179662 | intron_variant                                                                                    |
| rs902186200 | intron_variant,genic_upstream_transcript_variant                                                  |
| rs902201596 | intron_variant                                                                                    |
| rs902273826 | intron_variant,genic_upstream_transcript_variant                                                  |
| rs902309427 | intron_variant,genic_upstream_transcript_variant                                                  |
| rs902316258 | intron_variant                                                                                    |
| rs902341182 | intron_variant,genic_upstream_transcript_variant                                                  |
| rs902376341 | intron_variant,genic_downstream_transcript_variant                                                |
| rs902473210 | intron_variant                                                                                    |
| rs902532363 | intron_variant,genic_upstream_transcript_variant                                                  |
| rs902533713 | intron_variant                                                                                    |
| rs902539970 | intron_variant,genic_upstream_transcript_variant                                                  |

|             |                                                                                                    |
|-------------|----------------------------------------------------------------------------------------------------|
| rs902550966 | intron_variant,genic_downstream_transcript_variant                                                 |
| rs902559359 | intron_variant                                                                                     |
| rs902570217 | intron_variant,genic_downstream_transcript_variant                                                 |
| rs902580518 | intron_variant,genic_upstream_transcript_variant                                                   |
| rs902606551 | intron_variant,genic_downstream_transcript_variant                                                 |
| rs902611764 | intron_variant,genic_upstream_transcript_variant                                                   |
| rs902621951 | intron_variant,genic_upstream_transcript_variant,2KB_upstream_variant,upstream_transcript_variant  |
| rs902715676 | intron_variant                                                                                     |
| rs902734745 | intron_variant                                                                                     |
| rs902743840 | intron_variant,genic_upstream_transcript_variant                                                   |
| rs902753986 | intron_variant,genic_downstream_transcript_variant                                                 |
| rs902780925 | intron_variant,genic_upstream_transcript_variant                                                   |
| rs902783024 | intron_variant,genic_upstream_transcript_variant                                                   |
| rs902799906 | intron_variant                                                                                     |
| rs902862430 | intron_variant,genic_upstream_transcript_variant                                                   |
| rs902884302 | intron_variant,genic_downstream_transcript_variant                                                 |
| rs902888340 | intron_variant,genic_upstream_transcript_variant,upstream_transcript_variant                       |
| rs902900948 | intron_variant,genic_downstream_transcript_variant                                                 |
| rs902935683 | intron_variant,genic_upstream_transcript_variant,2KB_upstream_variant,upstream_transcript_variant  |
| rs902936792 | intron_variant,genic_downstream_transcript_variant                                                 |
| rs902940348 | intron_variant,genic_upstream_transcript_variant                                                   |
| rs902967673 | intron_variant                                                                                     |
| rs902996863 | intron_variant                                                                                     |
| rs903029231 | intron_variant,genic_downstream_transcript_variant                                                 |
| rs903039204 | intron_variant,genic_downstream_transcript_variant                                                 |
| rs903053147 | intron_variant                                                                                     |
| rs903056150 | intron_variant,genic_upstream_transcript_variant                                                   |
| rs903056437 | intron_variant,genic_upstream_transcript_variant                                                   |
| rs903086609 | intron_variant,genic_upstream_transcript_variant                                                   |
| rs903120297 | non_coding_transcript_variant,genic_upstream_transcript_variant,intron_variant,5_prime_UTR_variant |
| rs903127125 | intron_variant,genic_upstream_transcript_variant,upstream_transcript_variant                       |
| rs903157711 | intron_variant,genic_upstream_transcript_variant                                                   |
| rs903168256 | intron_variant,genic_downstream_transcript_variant                                                 |
| rs903231460 | intron_variant,genic_upstream_transcript_variant                                                   |
| rs903256594 | intron_variant                                                                                     |
| rs903307026 | intron_variant,genic_downstream_transcript_variant                                                 |
| rs903318335 | intron_variant,genic_downstream_transcript_variant                                                 |
| rs903331035 | intron_variant                                                                                     |
| rs903331587 | intron_variant                                                                                     |
| rs903367021 | intron_variant,genic_upstream_transcript_variant                                                   |
| rs903422061 | intron_variant,genic_upstream_transcript_variant                                                   |
| rs903426131 | intron_variant                                                                                     |
| rs903442983 | intron_variant,genic_upstream_transcript_variant                                                   |
| rs903447741 | intron_variant                                                                                     |
| rs903454693 | intron_variant,genic_downstream_transcript_variant                                                 |
| rs903478953 | intron_variant                                                                                     |
| rs903484078 | intron_variant,genic_downstream_transcript_variant                                                 |
| rs903530192 | intron_variant,genic_upstream_transcript_variant,2KB_upstream_variant,upstream_transcript_variant  |
| rs903568106 | intron_variant                                                                                     |
| rs903579560 | intron_variant,genic_downstream_transcript_variant                                                 |
| rs903594554 | intron_variant                                                                                     |
| rs903598316 | intron_variant,genic_upstream_transcript_variant                                                   |
| rs903612109 | intron_variant,genic_downstream_transcript_variant                                                 |
| rs903619786 | intron_variant,genic_downstream_transcript_variant                                                 |
| rs903625267 | intron_variant,genic_upstream_transcript_variant                                                   |
| rs903645501 | intron_variant                                                                                     |
| rs903657975 | intron_variant,genic_upstream_transcript_variant                                                   |
| rs903691765 | intron_variant,genic_upstream_transcript_variant                                                   |
| rs903709523 | intron_variant                                                                                     |
| rs903721711 | intron_variant,genic_downstream_transcript_variant                                                 |
| rs903736538 | intron_variant                                                                                     |
| rs903750104 | intron_variant,genic_upstream_transcript_variant                                                   |
| rs903752804 | intron_variant,genic_upstream_transcript_variant                                                   |
| rs903756538 | intron_variant                                                                                     |
| rs903808434 | intron_variant                                                                                     |
| rs903821612 | intron_variant,genic_upstream_transcript_variant                                                   |
| rs903826950 | intron_variant                                                                                     |
| rs903846931 | intron_variant                                                                                     |
| rs903852843 | intron_variant,genic_upstream_transcript_variant                                                   |
| rs903883640 | intron_variant,genic_upstream_transcript_variant                                                   |
| rs903887373 | intron_variant,genic_downstream_transcript_variant                                                 |
| rs903915262 | intron_variant,genic_upstream_transcript_variant                                                   |
| rs903945350 | intron_variant,genic_upstream_transcript_variant                                                   |
| rs903983996 | intron_variant                                                                                     |

|             |                                                                                                   |
|-------------|---------------------------------------------------------------------------------------------------|
| rs904015346 | intron_variant,genic_upstream_transcript_variant                                                  |
| rs904031307 | intron_variant                                                                                    |
| rs904048222 | intron_variant,genic_upstream_transcript_variant                                                  |
| rs904096948 | intron_variant                                                                                    |
| rs904123077 | intron_variant,genic_downstream_transcript_variant                                                |
| rs904149010 | intron_variant                                                                                    |
| rs904191799 | intron_variant                                                                                    |
| rs904246726 | intron_variant,genic_upstream_transcript_variant                                                  |
| rs904280419 | intron_variant,genic_upstream_transcript_variant                                                  |
| rs904320711 | intron_variant,genic_downstream_transcript_variant                                                |
| rs904338459 | intron_variant                                                                                    |
| rs904353109 | intron_variant,genic_upstream_transcript_variant                                                  |
| rs904369089 | intron_variant                                                                                    |
| rs904384409 | intron_variant,genic_downstream_transcript_variant                                                |
| rs904430680 | intron_variant                                                                                    |
| rs904453227 | intron_variant                                                                                    |
| rs904454221 | intron_variant,genic_downstream_transcript_variant                                                |
| rs904457791 | intron_variant,genic_downstream_transcript_variant                                                |
| rs904463381 | intron_variant                                                                                    |
| rs904498286 | intron_variant                                                                                    |
| rs904514538 | intron_variant,genic_upstream_transcript_variant                                                  |
| rs904524372 | intron_variant,5_prime_UTR_variant                                                                |
| rs904554523 | intron_variant                                                                                    |
| rs904559594 | synonymous_variant,coding_sequence_variant,non_coding_transcript_variant                          |
| rs904598041 | intron_variant,genic_upstream_transcript_variant                                                  |
| rs904607621 | intron_variant,genic_upstream_transcript_variant                                                  |
| rs904633047 | intron_variant,genic_upstream_transcript_variant                                                  |
| rs904637920 | intron_variant,genic_upstream_transcript_variant                                                  |
| rs904654047 | intron_variant,genic_upstream_transcript_variant                                                  |
| rs904672331 | intron_variant,genic_downstream_transcript_variant                                                |
| rs904680049 | intron_variant                                                                                    |
| rs904738215 | intron_variant,genic_downstream_transcript_variant                                                |
| rs904777214 | intron_variant,genic_upstream_transcript_variant                                                  |
| rs904872509 | intron_variant,genic_upstream_transcript_variant                                                  |
| rs904879619 | intron_variant,genic_upstream_transcript_variant                                                  |
| rs904896510 | intron_variant                                                                                    |
| rs904899025 | intron_variant,genic_downstream_transcript_variant                                                |
| rs904915397 | intron_variant                                                                                    |
| rs904922695 | intron_variant,genic_upstream_transcript_variant                                                  |
| rs904951445 | intron_variant,genic_downstream_transcript_variant                                                |
| rs904955909 | intron_variant,genic_downstream_transcript_variant                                                |
| rs904974488 | intron_variant,genic_upstream_transcript_variant                                                  |
| rs904995215 | intron_variant,genic_upstream_transcript_variant                                                  |
| rs905031520 | intron_variant                                                                                    |
| rs905055278 | intron_variant,genic_downstream_transcript_variant,downstream_transcript_variant                  |
| rs905056587 | intron_variant,genic_upstream_transcript_variant                                                  |
| rs905084944 | intron_variant                                                                                    |
| rs905131578 | intron_variant,genic_upstream_transcript_variant                                                  |
| rs905132293 | intron_variant,genic_upstream_transcript_variant                                                  |
| rs905167763 | intron_variant                                                                                    |
| rs905175292 | intron_variant,genic_downstream_transcript_variant                                                |
| rs905192814 | 3_prime_UTR_variant,non_coding_transcript_variant,genic_downstream_transcript_variant             |
| rs905227349 | intron_variant,genic_upstream_transcript_variant                                                  |
| rs905262666 | intron_variant,genic_downstream_transcript_variant                                                |
| rs905280191 | intron_variant,genic_upstream_transcript_variant                                                  |
| rs905288814 | intron_variant,genic_upstream_transcript_variant,upstream_transcript_variant                      |
| rs905311101 | intron_variant,genic_downstream_transcript_variant                                                |
| rs905374456 | intron_variant,genic_upstream_transcript_variant,2KB_upstream_variant,upstream_transcript_variant |
| rs905396043 | intron_variant                                                                                    |
| rs905409321 | intron_variant                                                                                    |
| rs905430304 | intron_variant                                                                                    |
| rs905443260 | intron_variant,genic_upstream_transcript_variant                                                  |
| rs905460095 | intron_variant,genic_downstream_transcript_variant                                                |
| rs905466828 | intron_variant,genic_upstream_transcript_variant,2KB_upstream_variant,upstream_transcript_variant |
| rs905506485 | intron_variant,genic_upstream_transcript_variant                                                  |
| rs905508852 | intron_variant,genic_downstream_transcript_variant                                                |
| rs905567236 | intron_variant                                                                                    |
| rs905574715 | intron_variant                                                                                    |
| rs905599491 | intron_variant,genic_downstream_transcript_variant                                                |
| rs905615798 | intron_variant                                                                                    |
| rs905643748 | intron_variant,genic_upstream_transcript_variant                                                  |
| rs905644783 | intron_variant,genic_downstream_transcript_variant                                                |
| rs905658873 | intron_variant,genic_downstream_transcript_variant                                                |
| rs905695443 | intron_variant,genic_downstream_transcript_variant                                                |

|             |                                                                                                   |
|-------------|---------------------------------------------------------------------------------------------------|
| rs905707871 | intron_variant,genic_upstream_transcript_variant                                                  |
| rs905733602 | intron_variant                                                                                    |
| rs905762881 | intron_variant                                                                                    |
| rs905782294 | intron_variant,genic_upstream_transcript_variant                                                  |
| rs905790118 | intron_variant,genic_downstream_transcript_variant                                                |
| rs905808630 | intron_variant                                                                                    |
| rs905830681 | intron_variant,genic_upstream_transcript_variant                                                  |
| rs905831706 | intron_variant,genic_upstream_transcript_variant                                                  |
| rs905985177 | intron_variant                                                                                    |
| rs906041033 | intron_variant                                                                                    |
| rs906054424 | intron_variant                                                                                    |
| rs906107221 | intron_variant                                                                                    |
| rs906119396 | intron_variant,genic_upstream_transcript_variant                                                  |
| rs906148961 | intron_variant,genic_downstream_transcript_variant                                                |
| rs906151787 | intron_variant                                                                                    |
| rs906173881 | intron_variant,genic_upstream_transcript_variant                                                  |
| rs906227434 | intron_variant,genic_upstream_transcript_variant                                                  |
| rs906245346 | intron_variant,genic_upstream_transcript_variant,2KB_upstream_variant,upstream_transcript_variant |
| rs906283761 | intron_variant                                                                                    |
| rs906287897 | intron_variant,genic_upstream_transcript_variant                                                  |
| rs906310174 | intron_variant                                                                                    |
| rs906324485 | intron_variant,genic_downstream_transcript_variant                                                |
| rs906402014 | intron_variant                                                                                    |
| rs906404083 | intron_variant                                                                                    |
| rs906407678 | intron_variant,genic_upstream_transcript_variant                                                  |
| rs906440721 | intron_variant,genic_downstream_transcript_variant                                                |
| rs906460571 | intron_variant,genic_upstream_transcript_variant                                                  |
| rs906469324 | intron_variant,genic_upstream_transcript_variant                                                  |
| rs906477896 | intron_variant                                                                                    |
| rs906538432 | intron_variant,genic_upstream_transcript_variant                                                  |
| rs906631536 | intron_variant,genic_downstream_transcript_variant                                                |
| rs906651609 | intron_variant                                                                                    |
| rs906657752 | intron_variant,genic_upstream_transcript_variant                                                  |
| rs906666484 | intron_variant,genic_upstream_transcript_variant                                                  |
| rs906688783 | intron_variant,genic_upstream_transcript_variant                                                  |
| rs906824291 | intron_variant,genic_upstream_transcript_variant                                                  |
| rs906824515 | intron_variant                                                                                    |
| rs906876420 | intron_variant,genic_upstream_transcript_variant                                                  |
| rs906888167 | intron_variant                                                                                    |
| rs906892018 | intron_variant                                                                                    |
| rs906975930 | intron_variant                                                                                    |
| rs906980961 | intron_variant                                                                                    |
| rs906995755 | genic_upstream_transcript_variant,intron_variant                                                  |
| rs906999846 | intron_variant                                                                                    |
| rs907019694 | genic_upstream_transcript_variant,intron_variant                                                  |
| rs907106214 | intron_variant                                                                                    |
| rs907146102 | 3_prime_UTR_variant,non_coding_transcript_variant,genic_downstream_transcript_variant             |
| rs907153129 | 500B_downstream_variant,downstream_transcript_variant                                             |
| rs907156890 | intron_variant                                                                                    |
| rs907204455 | genic_upstream_transcript_variant,intron_variant                                                  |
| rs907235903 | intron_variant                                                                                    |
| rs907237269 | genic_upstream_transcript_variant,intron_variant                                                  |
| rs907249941 | intron_variant                                                                                    |
| rs907262223 | genic_upstream_transcript_variant,intron_variant                                                  |
| rs907266328 | genic_downstream_transcript_variant,intron_variant                                                |
| rs907286172 | genic_downstream_transcript_variant,intron_variant                                                |
| rs907302279 | intron_variant                                                                                    |
| rs907338341 | upstream_transcript_variant,genic_upstream_transcript_variant,intron_variant,2KB_upstream_variant |
| rs907378294 | genic_upstream_transcript_variant,intron_variant                                                  |
| rs907409362 | genic_upstream_transcript_variant,intron_variant                                                  |
| rs907414490 | genic_upstream_transcript_variant,intron_variant                                                  |
| rs907424573 | genic_upstream_transcript_variant,intron_variant                                                  |
| rs907426975 | intron_variant                                                                                    |
| rs907474208 | upstream_transcript_variant,genic_upstream_transcript_variant,intron_variant,2KB_upstream_variant |
| rs907515073 | genic_upstream_transcript_variant,intron_variant                                                  |
| rs907598998 | intron_variant                                                                                    |
| rs907601369 | genic_downstream_transcript_variant,intron_variant                                                |
| rs907603008 | genic_upstream_transcript_variant,intron_variant                                                  |
| rs907615485 | genic_upstream_transcript_variant,intron_variant                                                  |
| rs907618252 | intron_variant                                                                                    |
| rs907629560 | intron_variant                                                                                    |
| rs907678968 | genic_upstream_transcript_variant,intron_variant                                                  |
| rs907688326 | upstream_transcript_variant,2KB_upstream_variant,genic_upstream_transcript_variant,intron_variant |
| rs907719341 | non_coding_transcript_variant,genic_upstream_transcript_variant,intron_variant                    |

|             |                                                                                                   |
|-------------|---------------------------------------------------------------------------------------------------|
| rs907743396 | intron_variant                                                                                    |
| rs907779413 | genic_upstream_transcript_variant,intron_variant                                                  |
| rs907795502 | intron_variant                                                                                    |
| rs907801427 | genic_upstream_transcript_variant,intron_variant                                                  |
| rs907804404 | genic_downstream_transcript_variant,intron_variant                                                |
| rs907812535 | genic_upstream_transcript_variant,intron_variant                                                  |
| rs907816733 | intron_variant                                                                                    |
| rs907856338 | intron_variant                                                                                    |
| rs907886371 | genic_upstream_transcript_variant,intron_variant                                                  |
| rs907886741 | genic_upstream_transcript_variant,intron_variant                                                  |
| rs907892456 | upstream_transcript_variant,genic_upstream_transcript_variant,intron_variant,2KB_upstream_variant |
| rs907897276 | genic_downstream_transcript_variant,intron_variant                                                |
| rs907935348 | genic_upstream_transcript_variant,intron_variant                                                  |
| rs907977889 | genic_downstream_transcript_variant,intron_variant                                                |
| rs908027202 | intron_variant                                                                                    |
| rs908102068 | intron_variant                                                                                    |
| rs908124464 | 3_prime_UTR_variant,non_coding_transcript_variant,genic_downstream_transcript_variant             |
| rs908138585 | genic_upstream_transcript_variant,intron_variant                                                  |
| rs908151184 | intron_variant                                                                                    |
| rs908159868 | genic_upstream_transcript_variant,intron_variant                                                  |
| rs908168624 | genic_upstream_transcript_variant,intron_variant                                                  |
| rs908190254 | intron_variant                                                                                    |
| rs908208664 | genic_upstream_transcript_variant,intron_variant                                                  |
| rs908219533 | intron_variant                                                                                    |
| rs908226400 | genic_upstream_transcript_variant,intron_variant                                                  |
| rs908232411 | genic_downstream_transcript_variant,intron_variant                                                |
| rs908268728 | genic_upstream_transcript_variant,intron_variant                                                  |
| rs908317365 | intron_variant                                                                                    |
| rs908327609 | genic_upstream_transcript_variant,intron_variant                                                  |
| rs908361874 | intron_variant                                                                                    |
| rs908399541 | genic_upstream_transcript_variant,intron_variant                                                  |
| rs908436555 | intron_variant                                                                                    |
| rs908458153 | genic_downstream_transcript_variant,intron_variant                                                |
| rs908488802 | intron_variant                                                                                    |
| rs908492781 | genic_upstream_transcript_variant,intron_variant                                                  |
| rs908511861 | genic_downstream_transcript_variant,intron_variant                                                |
| rs908530457 | intron_variant                                                                                    |
| rs908541205 | genic_downstream_transcript_variant,intron_variant                                                |
| rs908574113 | genic_upstream_transcript_variant,intron_variant                                                  |
| rs908584018 | intron_variant                                                                                    |
| rs908587790 | genic_downstream_transcript_variant,intron_variant                                                |
| rs908618872 | genic_downstream_transcript_variant,intron_variant                                                |
| rs908639492 | intron_variant                                                                                    |
| rs908710074 | upstream_transcript_variant,genic_upstream_transcript_variant,intron_variant                      |
| rs908710942 | genic_upstream_transcript_variant,intron_variant                                                  |
| rs908713154 | genic_upstream_transcript_variant,intron_variant                                                  |
| rs908725175 | intron_variant                                                                                    |
| rs908786110 | genic_downstream_transcript_variant,intron_variant                                                |
| rs908797866 | upstream_transcript_variant,2KB_upstream_variant,genic_upstream_transcript_variant,intron_variant |
| rs908886592 | intron_variant                                                                                    |
| rs908892041 | genic_upstream_transcript_variant,intron_variant                                                  |
| rs908894472 | genic_upstream_transcript_variant,intron_variant                                                  |
| rs908945533 | genic_upstream_transcript_variant,intron_variant                                                  |
| rs908970471 | genic_upstream_transcript_variant,intron_variant                                                  |
| rs908991222 | genic_upstream_transcript_variant,intron_variant                                                  |
| rs909050251 | intron_variant                                                                                    |
| rs909088409 | genic_downstream_transcript_variant,intron_variant                                                |
| rs909115462 | intron_variant                                                                                    |
| rs909125563 | genic_upstream_transcript_variant,intron_variant                                                  |
| rs909127758 | 500B_downstream_variant,downstream_transcript_variant                                             |
| rs909148540 | genic_downstream_transcript_variant,intron_variant                                                |
| rs909205753 | intron_variant                                                                                    |
| rs909206616 | genic_upstream_transcript_variant,intron_variant                                                  |
| rs909224645 | intron_variant                                                                                    |
| rs909269103 | intron_variant                                                                                    |
| rs909279414 | genic_upstream_transcript_variant,intron_variant                                                  |
| rs909379316 | intron_variant                                                                                    |
| rs909387765 | genic_downstream_transcript_variant,intron_variant                                                |
| rs909401416 | intron_variant                                                                                    |
| rs909407453 | genic_downstream_transcript_variant,intron_variant                                                |
| rs909419666 | genic_upstream_transcript_variant,intron_variant                                                  |
| rs909421271 | genic_upstream_transcript_variant,intron_variant                                                  |
| rs909468318 | upstream_transcript_variant,genic_upstream_transcript_variant,intron_variant,2KB_upstream_variant |
| rs909470004 | genic_upstream_transcript_variant,intron_variant                                                  |

|             |                                                                                                    |
|-------------|----------------------------------------------------------------------------------------------------|
| rs909593064 | intron_variant                                                                                     |
| rs909601201 | intron_variant                                                                                     |
| rs909607387 | genic_upstream_transcript_variant,intron_variant                                                   |
| rs909631412 | genic_upstream_transcript_variant,intron_variant                                                   |
| rs909668625 | genic_upstream_transcript_variant,intron_variant                                                   |
| rs909679918 | genic_upstream_transcript_variant,intron_variant                                                   |
| rs909691977 | genic_downstream_transcript_variant,intron_variant                                                 |
| rs909726407 | genic_downstream_transcript_variant,intron_variant                                                 |
| rs909791844 | upstream_transcript_variant,genic_upstream_transcript_variant,intron_variant                       |
| rs909803554 | upstream_transcript_variant,genic_upstream_transcript_variant,intron_variant                       |
| rs909814578 | upstream_transcript_variant,genic_upstream_transcript_variant,intron_variant,2KB_upstream_variant  |
| rs909816686 | intron_variant                                                                                     |
| rs909865764 | genic_upstream_transcript_variant,intron_variant                                                   |
| rs909902096 | genic_downstream_transcript_variant,intron_variant                                                 |
| rs909916113 | genic_upstream_transcript_variant,intron_variant                                                   |
| rs909954312 | genic_downstream_transcript_variant,intron_variant                                                 |
| rs909961986 | intron_variant                                                                                     |
| rs909974334 | genic_downstream_transcript_variant,intron_variant                                                 |
| rs909985530 | genic_downstream_transcript_variant,intron_variant                                                 |
| rs910029798 | upstream_transcript_variant,2KB_upstream_variant,genic_upstream_transcript_variant,intron_variant  |
| rs910061089 | upstream_transcript_variant,2KB_upstream_variant,genic_upstream_transcript_variant,intron_variant  |
| rs910063617 | genic_upstream_transcript_variant,intron_variant                                                   |
| rs910091075 | intron_variant                                                                                     |
| rs910120814 | genic_downstream_transcript_variant,intron_variant                                                 |
| rs910141339 | intron_variant                                                                                     |
| rs910147857 | intron_variant                                                                                     |
| rs910150512 | genic_downstream_transcript_variant,intron_variant                                                 |
| rs910184196 | genic_upstream_transcript_variant,intron_variant                                                   |
| rs910236555 | genic_upstream_transcript_variant,intron_variant                                                   |
| rs910238782 | intron_variant                                                                                     |
| rs910251230 | genic_upstream_transcript_variant,intron_variant                                                   |
| rs910291546 | genic_upstream_transcript_variant,intron_variant                                                   |
| rs910305969 | upstream_transcript_variant,genic_upstream_transcript_variant,intron_variant                       |
| rs910307059 | genic_upstream_transcript_variant,intron_variant                                                   |
| rs910329334 | intron_variant                                                                                     |
| rs910356166 | genic_upstream_transcript_variant,intron_variant                                                   |
| rs910361745 | intron_variant                                                                                     |
| rs910402297 | genic_upstream_transcript_variant,intron_variant                                                   |
| rs910435047 | intron_variant                                                                                     |
| rs910465948 | genic_downstream_transcript_variant,intron_variant                                                 |
| rs910466521 | genic_upstream_transcript_variant,intron_variant                                                   |
| rs910472502 | genic_upstream_transcript_variant,intron_variant                                                   |
| rs910477933 | genic_upstream_transcript_variant,intron_variant                                                   |
| rs910520684 | genic_upstream_transcript_variant,intron_variant                                                   |
| rs910534422 | genic_downstream_transcript_variant,intron_variant                                                 |
| rs910537104 | intron_variant                                                                                     |
| rs910541035 | intron_variant                                                                                     |
| rs910558384 | intron_variant                                                                                     |
| rs910568990 | genic_upstream_transcript_variant,intron_variant                                                   |
| rs910576687 | genic_upstream_transcript_variant,intron_variant                                                   |
| rs910598704 | genic_downstream_transcript_variant,intron_variant                                                 |
| rs910662313 | genic_upstream_transcript_variant,intron_variant                                                   |
| rs910706547 | intron_variant                                                                                     |
| rs910716594 | genic_upstream_transcript_variant,intron_variant                                                   |
| rs910720381 | genic_upstream_transcript_variant,intron_variant                                                   |
| rs910728761 | intron_variant                                                                                     |
| rs910737487 | intron_variant                                                                                     |
| rs910751480 | 5_prime_UTR_variant,genic_upstream_transcript_variant,intron_variant,non_coding_transcript_variant |
| rs910834974 | upstream_transcript_variant,genic_upstream_transcript_variant,intron_variant,2KB_upstream_variant  |
| rs910837025 | genic_upstream_transcript_variant,intron_variant                                                   |
| rs910922607 | genic_upstream_transcript_variant,intron_variant                                                   |
| rs910999643 | intron_variant                                                                                     |
| rs911013717 | genic_upstream_transcript_variant,intron_variant                                                   |
| rs911014108 | genic_upstream_transcript_variant,intron_variant                                                   |
| rs911016293 | genic_upstream_transcript_variant,intron_variant                                                   |
| rs911031777 | intron_variant                                                                                     |
| rs911046325 | upstream_transcript_variant,genic_upstream_transcript_variant,intron_variant,2KB_upstream_variant  |
| rs911073360 | genic_upstream_transcript_variant,intron_variant                                                   |
| rs911081861 | intron_variant                                                                                     |
| rs911172164 | genic_downstream_transcript_variant,intron_variant                                                 |
| rs911176396 | intron_variant                                                                                     |
| rs911180773 | intron_variant                                                                                     |
| rs911208250 | genic_downstream_transcript_variant,intron_variant                                                 |
| rs911231477 | intron_variant                                                                                     |

|             |                                                                                       |
|-------------|---------------------------------------------------------------------------------------|
| rs911233995 | genic_upstream_transcript_variant,intron_variant                                      |
| rs911270597 | intron_variant                                                                        |
| rs911289515 | genic_upstream_transcript_variant,intron_variant                                      |
| rs911290722 | genic_downstream_transcript_variant,intron_variant                                    |
| rs911309410 | genic_downstream_transcript_variant,intron_variant                                    |
| rs911323680 | genic_downstream_transcript_variant,intron_variant                                    |
| rs911330211 | intron_variant                                                                        |
| rs911366276 | genic_upstream_transcript_variant,intron_variant                                      |
| rs911373024 | intron_variant                                                                        |
| rs911408438 | intron_variant                                                                        |
| rs911414222 | genic_upstream_transcript_variant,intron_variant                                      |
| rs911426773 | genic_downstream_transcript_variant,intron_variant                                    |
| rs911459560 | genic_upstream_transcript_variant,intron_variant                                      |
| rs911494024 | genic_upstream_transcript_variant,intron_variant                                      |
| rs911503091 | intron_variant                                                                        |
| rs911515578 | genic_upstream_transcript_variant,intron_variant                                      |
| rs911540603 | intron_variant                                                                        |
| rs911557796 | intron_variant                                                                        |
| rs911571952 | genic_upstream_transcript_variant,intron_variant                                      |
| rs911593151 | intron_variant                                                                        |
| rs911602682 | genic_upstream_transcript_variant,intron_variant                                      |
| rs911623760 | intron_variant                                                                        |
| rs911657177 | genic_downstream_transcript_variant,intron_variant                                    |
| rs911722528 | genic_upstream_transcript_variant,intron_variant                                      |
| rs911731413 | genic_upstream_transcript_variant,intron_variant                                      |
| rs911743932 | intron_variant                                                                        |
| rs911756630 | genic_upstream_transcript_variant,intron_variant                                      |
| rs911801861 | 3_prime_UTR_variant,non_coding_transcript_variant,genic_downstream_transcript_variant |
| rs911838696 | intron_variant                                                                        |
| rs911841351 | genic_upstream_transcript_variant,intron_variant                                      |
| rs911853905 | intron_variant                                                                        |
| rs911860339 | genic_downstream_transcript_variant,intron_variant                                    |
| rs911968865 | genic_downstream_transcript_variant,intron_variant                                    |
| rs911969874 | intron_variant                                                                        |
| rs911987691 | intron_variant                                                                        |
| rs911991641 | genic_upstream_transcript_variant,intron_variant                                      |
| rs912039256 | genic_upstream_transcript_variant,intron_variant                                      |
| rs912040209 | genic_upstream_transcript_variant,intron_variant                                      |
| rs912072085 | genic_upstream_transcript_variant,intron_variant                                      |
| rs912078923 | genic_downstream_transcript_variant,intron_variant                                    |
| rs912087589 | genic_upstream_transcript_variant,intron_variant                                      |
| rs912113125 | intron_variant                                                                        |
| rs912122552 | genic_downstream_transcript_variant,intron_variant                                    |
| rs912126773 | genic_downstream_transcript_variant,intron_variant                                    |
| rs912146150 | intron_variant                                                                        |
| rs912150573 | genic_upstream_transcript_variant,intron_variant                                      |
| rs912162795 | intron_variant                                                                        |
| rs912213855 | intron_variant                                                                        |
| rs912256083 | genic_upstream_transcript_variant,intron_variant                                      |
| rs912277596 | genic_downstream_transcript_variant,intron_variant                                    |
| rs912307205 | genic_upstream_transcript_variant,intron_variant                                      |
| rs912324497 | genic_downstream_transcript_variant,intron_variant                                    |
| rs912326828 | genic_upstream_transcript_variant,intron_variant                                      |
| rs912334486 | intron_variant                                                                        |
| rs912371745 | genic_upstream_transcript_variant,intron_variant                                      |
| rs912396495 | genic_upstream_transcript_variant,intron_variant                                      |
| rs912401002 | intron_variant                                                                        |
| rs912443447 | intron_variant                                                                        |
| rs912448029 | genic_downstream_transcript_variant,intron_variant                                    |
| rs912470041 | genic_upstream_transcript_variant,intron_variant                                      |
| rs912522776 | intron_variant                                                                        |
| rs912534040 | genic_upstream_transcript_variant,intron_variant                                      |
| rs912542748 | genic_upstream_transcript_variant,intron_variant                                      |
| rs912587844 | genic_upstream_transcript_variant,intron_variant                                      |
| rs912637691 | genic_upstream_transcript_variant,intron_variant                                      |
| rs912640636 | intron_variant                                                                        |
| rs912685270 | genic_upstream_transcript_variant,intron_variant                                      |
| rs912689025 | intron_variant                                                                        |
| rs912698292 | genic_upstream_transcript_variant,intron_variant                                      |
| rs912804802 | genic_upstream_transcript_variant,intron_variant                                      |
| rs912810247 | genic_downstream_transcript_variant,intron_variant                                    |
| rs912810753 | genic_upstream_transcript_variant,intron_variant                                      |
| rs912813090 | genic_upstream_transcript_variant,intron_variant                                      |
| rs912835653 | genic_upstream_transcript_variant,intron_variant                                      |

|             |                                                                                                   |
|-------------|---------------------------------------------------------------------------------------------------|
| rs912854113 | intron_variant                                                                                    |
| rs912864910 | genic_downstream_transcript_variant,intron_variant                                                |
| rs912889714 | intron_variant                                                                                    |
| rs912890076 | intron_variant                                                                                    |
| rs912895149 | genic_downstream_transcript_variant,intron_variant                                                |
| rs912929812 | genic_upstream_transcript_variant,intron_variant                                                  |
| rs912941387 | genic_downstream_transcript_variant,intron_variant                                                |
| rs912947008 | intron_variant                                                                                    |
| rs912953490 | intron_variant                                                                                    |
| rs912972448 | genic_downstream_transcript_variant,intron_variant                                                |
| rs912988012 | upstream_transcript_variant,genic_upstream_transcript_variant,intron_variant,2KB_upstream_variant |
| rs913063432 | 3_prime_UTR_variant,non_coding_transcript_variant,genic_downstream_transcript_variant             |
| rs913075838 | intron_variant                                                                                    |
| rs913090996 | upstream_transcript_variant,genic_upstream_transcript_variant,intron_variant,2KB_upstream_variant |
| rs913128597 | genic_upstream_transcript_variant,intron_variant                                                  |
| rs913195866 | genic_upstream_transcript_variant,intron_variant                                                  |
| rs913201272 | genic_upstream_transcript_variant,intron_variant                                                  |
| rs913214053 | genic_upstream_transcript_variant,intron_variant                                                  |
| rs913245228 | genic_upstream_transcript_variant,intron_variant                                                  |
| rs913250114 | intron_variant                                                                                    |
| rs913254515 | intron_variant                                                                                    |
| rs913261113 | intron_variant                                                                                    |
| rs913273279 | genic_downstream_transcript_variant,intron_variant                                                |
| rs913282552 | intron_variant                                                                                    |
| rs913303699 | genic_upstream_transcript_variant,intron_variant                                                  |
| rs913304911 | intron_variant                                                                                    |
| rs913325524 | genic_downstream_transcript_variant,intron_variant                                                |
| rs913379643 | genic_downstream_transcript_variant,intron_variant                                                |
| rs913383047 | intron_variant                                                                                    |
| rs913391698 | genic_downstream_transcript_variant,intron_variant                                                |
| rs913430621 | genic_upstream_transcript_variant,intron_variant                                                  |
| rs913434884 | intron_variant                                                                                    |
| rs913442602 | genic_upstream_transcript_variant,intron_variant                                                  |
| rs913503649 | genic_upstream_transcript_variant,intron_variant                                                  |
| rs913548092 | upstream_transcript_variant,2KB_upstream_variant,genic_upstream_transcript_variant,intron_variant |
| rs913577559 | upstream_transcript_variant,2KB_upstream_variant,genic_upstream_transcript_variant,intron_variant |
| rs913584058 | genic_downstream_transcript_variant,intron_variant                                                |
| rs913584602 | intron_variant                                                                                    |
| rs913625620 | genic_upstream_transcript_variant,intron_variant                                                  |
| rs913640719 | intron_variant                                                                                    |
| rs913660804 | genic_downstream_transcript_variant,intron_variant                                                |
| rs913667986 | genic_upstream_transcript_variant,intron_variant                                                  |
| rs913684822 | intron_variant                                                                                    |
| rs913727331 | genic_downstream_transcript_variant,intron_variant                                                |
| rs913770250 | intron_variant                                                                                    |
| rs913777830 | genic_upstream_transcript_variant,intron_variant                                                  |
| rs913802173 | genic_downstream_transcript_variant,intron_variant                                                |
| rs913807283 | genic_upstream_transcript_variant,intron_variant                                                  |
| rs913878075 | genic_upstream_transcript_variant,intron_variant                                                  |
| rs913983341 | 3_prime_UTR_variant,non_coding_transcript_variant,genic_downstream_transcript_variant             |
| rs913993371 | genic_upstream_transcript_variant,intron_variant                                                  |
| rs913994505 | 3_prime_UTR_variant,non_coding_transcript_variant,genic_downstream_transcript_variant             |
| rs914006228 | intron_variant                                                                                    |
| rs914015459 | genic_upstream_transcript_variant,intron_variant                                                  |
| rs914040788 | intron_variant                                                                                    |
| rs914124687 | intron_variant                                                                                    |
| rs914156447 | intron_variant                                                                                    |
| rs914174561 | genic_upstream_transcript_variant,intron_variant                                                  |
| rs914198197 | intron_variant                                                                                    |
| rs914216401 | upstream_transcript_variant,genic_upstream_transcript_variant,intron_variant,2KB_upstream_variant |
| rs914227349 | intron_variant                                                                                    |
| rs914250784 | genic_upstream_transcript_variant,intron_variant                                                  |
| rs914251471 | intron_variant                                                                                    |
| rs914340384 | genic_downstream_transcript_variant,intron_variant                                                |
| rs914344550 | intron_variant                                                                                    |
| rs914346922 | genic_upstream_transcript_variant,intron_variant                                                  |
| rs914414650 | genic_upstream_transcript_variant,intron_variant                                                  |
| rs914474458 | genic_upstream_transcript_variant,intron_variant                                                  |
| rs914487550 | upstream_transcript_variant,genic_upstream_transcript_variant,intron_variant,2KB_upstream_variant |
| rs914502628 | genic_downstream_transcript_variant,intron_variant                                                |
| rs914523321 | genic_downstream_transcript_variant,intron_variant                                                |
| rs914530730 | genic_upstream_transcript_variant,intron_variant                                                  |
| rs914532756 | intron_variant                                                                                    |
| rs914547754 | genic_upstream_transcript_variant,intron_variant                                                  |

|             |                                                                                                                                             |
|-------------|---------------------------------------------------------------------------------------------------------------------------------------------|
| rs914583629 | intron_variant                                                                                                                              |
| rs914614864 | genic_downstream_transcript_variant,intron_variant                                                                                          |
| rs914645757 | genic_downstream_transcript_variant,intron_variant                                                                                          |
| rs914662174 | genic_upstream_transcript_variant,intron_variant                                                                                            |
| rs914668316 | intron_variant                                                                                                                              |
| rs914671397 | genic_upstream_transcript_variant,intron_variant                                                                                            |
| rs914715101 | intron_variant                                                                                                                              |
| rs914741312 | 500B_downstream_variant,downstream_transcript_variant                                                                                       |
| rs914757416 | intron_variant                                                                                                                              |
| rs914764641 | genic_upstream_transcript_variant,intron_variant                                                                                            |
| rs914823305 | genic_downstream_transcript_variant,intron_variant                                                                                          |
| rs914831340 | intron_variant                                                                                                                              |
| rs914832094 | genic_downstream_transcript_variant,intron_variant                                                                                          |
| rs914839688 | genic_upstream_transcript_variant,intron_variant                                                                                            |
| rs914919708 | genic_upstream_transcript_variant,intron_variant                                                                                            |
| rs914957605 | intron_variant                                                                                                                              |
| rs914995459 | genic_upstream_transcript_variant,intron_variant                                                                                            |
| rs915031123 | intron_variant                                                                                                                              |
| rs915101691 | genic_upstream_transcript_variant,intron_variant                                                                                            |
| rs915128276 | genic_downstream_transcript_variant,intron_variant                                                                                          |
| rs915146258 | genic_downstream_transcript_variant,intron_variant                                                                                          |
| rs915155828 | genic_upstream_transcript_variant,intron_variant                                                                                            |
| rs915164401 | intron_variant                                                                                                                              |
| rs915185928 | intron_variant                                                                                                                              |
| rs915193160 | genic_upstream_transcript_variant,intron_variant                                                                                            |
| rs915238202 | genic_downstream_transcript_variant,intron_variant                                                                                          |
| rs915248019 | genic_downstream_transcript_variant,intron_variant                                                                                          |
| rs915253843 | intron_variant                                                                                                                              |
| rs915269222 | genic_downstream_transcript_variant,intron_variant                                                                                          |
| rs915280256 | intron_variant                                                                                                                              |
| rs915280989 | genic_upstream_transcript_variant,intron_variant                                                                                            |
| rs915322174 | genic_downstream_transcript_variant,intron_variant                                                                                          |
| rs915326933 | genic_upstream_transcript_variant,intron_variant                                                                                            |
| rs915342068 | genic_upstream_transcript_variant,intron_variant                                                                                            |
| rs915342452 | intron_variant                                                                                                                              |
| rs915343529 | genic_upstream_transcript_variant,intron_variant                                                                                            |
| rs915386806 | upstream_transcript_variant,2KB_upstream_variant,genic_upstream_transcript_variant,intron_variant                                           |
| rs915419449 | genic_upstream_transcript_variant,intron_variant                                                                                            |
| rs915421978 | genic_upstream_transcript_variant,intron_variant                                                                                            |
| rs915435216 | upstream_transcript_variant,2KB_upstream_variant,genic_upstream_transcript_variant,intron_variant                                           |
| rs915454137 | intron_variant                                                                                                                              |
| rs915499788 | genic_upstream_transcript_variant,intron_variant                                                                                            |
| rs915525826 | intron_variant                                                                                                                              |
| rs915534389 | intron_variant                                                                                                                              |
| rs915544481 | genic_upstream_transcript_variant,intron_variant                                                                                            |
| rs915614772 | intron_variant                                                                                                                              |
| rs915692777 | intron_variant                                                                                                                              |
| rs915694613 | genic_upstream_transcript_variant,intron_variant                                                                                            |
| rs915705016 | genic_upstream_transcript_variant,intron_variant                                                                                            |
| rs915725083 | intron_variant                                                                                                                              |
| rs915776471 | genic_downstream_transcript_variant,intron_variant                                                                                          |
| rs915870536 | genic_upstream_transcript_variant,intron_variant                                                                                            |
| rs915874823 | genic_downstream_transcript_variant,intron_variant                                                                                          |
| rs915934010 | non_coding_transcript_variant,genic_upstream_transcript_variant,intron_variant                                                              |
| rs915951822 | intron_variant                                                                                                                              |
| rs915963287 | intron_variant                                                                                                                              |
| rs915978772 | coding_sequence_variant,intron_variant,genic_upstream_transcript_variant,synonymous_variant,non_coding_transcript_variant                   |
| rs916004644 | coding_sequence_variant,intron_variant,5_prime_UTR_variant,genic_upstream_transcript_variant,non_coding_transcript_variant,missense_variant |
| rs916056075 | intron_variant                                                                                                                              |
| rs916095164 | intron_variant                                                                                                                              |
| rs916095395 | genic_upstream_transcript_variant,intron_variant                                                                                            |
| rs916116152 | intron_variant                                                                                                                              |
| rs916126282 | intron_variant                                                                                                                              |
| rs916143248 | genic_downstream_transcript_variant,intron_variant                                                                                          |
| rs916177472 | genic_downstream_transcript_variant,intron_variant                                                                                          |
| rs916184599 | intron_variant                                                                                                                              |
| rs916208536 | genic_downstream_transcript_variant,intron_variant                                                                                          |
| rs916272656 | upstream_transcript_variant,2KB_upstream_variant,genic_upstream_transcript_variant,intron_variant                                           |
| rs916305057 | upstream_transcript_variant,2KB_upstream_variant,genic_upstream_transcript_variant,intron_variant                                           |
| rs916321248 | genic_downstream_transcript_variant,intron_variant                                                                                          |
| rs916325723 | genic_upstream_transcript_variant,intron_variant                                                                                            |
| rs916331630 | genic_upstream_transcript_variant,intron_variant                                                                                            |
| rs916340923 | intron_variant                                                                                                                              |
| rs916407046 | genic_downstream_transcript_variant,intron_variant                                                                                          |

|             |                                                                                                    |
|-------------|----------------------------------------------------------------------------------------------------|
| rs916414320 | genic_upstream_transcript_variant,intron_variant                                                   |
| rs916462837 | genic_upstream_transcript_variant,intron_variant                                                   |
| rs916464530 | intron_variant                                                                                     |
| rs916480017 | genic_downstream_transcript_variant,intron_variant                                                 |
| rs916497601 | genic_downstream_transcript_variant,intron_variant                                                 |
| rs916502190 | intron_variant                                                                                     |
| rs916510960 | genic_downstream_transcript_variant,intron_variant                                                 |
| rs916524845 | genic_upstream_transcript_variant,intron_variant                                                   |
| rs916551290 | intron_variant                                                                                     |
| rs916698951 | genic_upstream_transcript_variant,intron_variant                                                   |
| rs916700097 | upstream_transcript_variant,genic_upstream_transcript_variant,intron_variant,2KB_upstream_variant  |
| rs916702214 | intron_variant                                                                                     |
| rs916713398 | genic_downstream_transcript_variant,intron_variant                                                 |
| rs916718833 | intron_variant                                                                                     |
| rs916752805 | genic_upstream_transcript_variant,intron_variant                                                   |
| rs916778287 | intron_variant                                                                                     |
| rs916799997 | genic_upstream_transcript_variant,intron_variant                                                   |
| rs916829339 | intron_variant                                                                                     |
| rs916870888 | genic_upstream_transcript_variant,intron_variant                                                   |
| rs916887872 | genic_upstream_transcript_variant,intron_variant                                                   |
| rs916927812 | upstream_transcript_variant,genic_upstream_transcript_variant,intron_variant                       |
| rs916928244 | intron_variant                                                                                     |
| rs916982498 | intron_variant                                                                                     |
| rs916983613 | 3_prime_UTR_variant,non_coding_transcript_variant,genic_downstream_transcript_variant              |
| rs917003024 | genic_upstream_transcript_variant,intron_variant                                                   |
| rs917008172 | 5_prime_UTR_variant,genic_upstream_transcript_variant,intron_variant,non_coding_transcript_variant |
| rs917008760 | genic_upstream_transcript_variant,intron_variant                                                   |
| rs917056724 | genic_downstream_transcript_variant,intron_variant                                                 |
| rs917090670 | genic_downstream_transcript_variant,intron_variant                                                 |
| rs917105176 | genic_upstream_transcript_variant,intron_variant                                                   |
| rs917109442 | intron_variant                                                                                     |
| rs917145826 | genic_downstream_transcript_variant,intron_variant                                                 |
| rs917151876 | genic_downstream_transcript_variant,intron_variant                                                 |
| rs917166604 | intron_variant                                                                                     |
| rs917180203 | genic_upstream_transcript_variant,intron_variant                                                   |
| rs917184495 | genic_downstream_transcript_variant,intron_variant                                                 |
| rs917191940 | genic_upstream_transcript_variant,intron_variant                                                   |
| rs917221635 | genic_downstream_transcript_variant,intron_variant                                                 |
| rs917224861 | genic_upstream_transcript_variant,intron_variant                                                   |
| rs917263857 | genic_downstream_transcript_variant,downstream_transcript_variant,intron_variant                   |
| rs917266638 | intron_variant                                                                                     |
| rs917282326 | genic_upstream_transcript_variant,intron_variant                                                   |
| rs917332351 | genic_downstream_transcript_variant,intron_variant                                                 |
| rs917349025 | intron_variant                                                                                     |
| rs917353750 | intron_variant                                                                                     |
| rs917363288 | genic_upstream_transcript_variant,intron_variant                                                   |
| rs917476864 | genic_upstream_transcript_variant,intron_variant                                                   |
| rs917480721 | intron_variant                                                                                     |
| rs917494772 | intron_variant                                                                                     |
| rs917527270 | intron_variant                                                                                     |
| rs917539056 | genic_upstream_transcript_variant,intron_variant                                                   |
| rs917545902 | genic_upstream_transcript_variant,intron_variant                                                   |
| rs917571337 | intron_variant                                                                                     |
| rs917667676 | genic_downstream_transcript_variant,intron_variant                                                 |
| rs917699456 | genic_upstream_transcript_variant,intron_variant                                                   |
| rs917701958 | intron_variant                                                                                     |
| rs917728272 | genic_upstream_transcript_variant,intron_variant                                                   |
| rs917774485 | genic_upstream_transcript_variant,intron_variant                                                   |
| rs917833316 | intron_variant                                                                                     |
| rs917875206 | genic_upstream_transcript_variant,intron_variant                                                   |
| rs917893346 | genic_upstream_transcript_variant,intron_variant                                                   |
| rs917922985 | genic_upstream_transcript_variant,intron_variant                                                   |
| rs917949465 | intron_variant                                                                                     |
| rs917964618 | genic_downstream_transcript_variant,intron_variant                                                 |
| rs917966721 | intron_variant                                                                                     |
| rs917987322 | genic_downstream_transcript_variant,intron_variant                                                 |
| rs918004285 | genic_downstream_transcript_variant,intron_variant                                                 |
| rs918014783 | intron_variant                                                                                     |
| rs918052587 | genic_upstream_transcript_variant,intron_variant                                                   |
| rs918074194 | intron_variant                                                                                     |
| rs918078044 | intron_variant                                                                                     |
| rs918081676 | genic_downstream_transcript_variant,intron_variant                                                 |
| rs918086337 | genic_upstream_transcript_variant,intron_variant                                                   |
| rs918106759 | genic_upstream_transcript_variant,intron_variant                                                   |

|             |                                                                                                    |
|-------------|----------------------------------------------------------------------------------------------------|
| rs918145681 | intron_variant                                                                                     |
| rs918149604 | genic_upstream_transcript_variant,intron_variant                                                   |
| rs918234707 | genic_upstream_transcript_variant,intron_variant                                                   |
| rs918269867 | genic_upstream_transcript_variant,intron_variant                                                   |
| rs918313066 | intron_variant                                                                                     |
| rs918327997 | genic_upstream_transcript_variant,intron_variant                                                   |
| rs918337574 | intron_variant                                                                                     |
| rs918434673 | intron_variant                                                                                     |
| rs918435800 | genic_upstream_transcript_variant,intron_variant                                                   |
| rs918454726 | genic_downstream_transcript_variant,intron_variant                                                 |
| rs918458866 | intron_variant                                                                                     |
| rs918469239 | intron_variant                                                                                     |
| rs918476124 | genic_downstream_transcript_variant,intron_variant                                                 |
| rs918488343 | genic_upstream_transcript_variant,intron_variant                                                   |
| rs918499092 | genic_upstream_transcript_variant,intron_variant                                                   |
| rs918510845 | intron_variant                                                                                     |
| rs918518955 | genic_downstream_transcript_variant,intron_variant                                                 |
| rs918541399 | intron_variant                                                                                     |
| rs918554987 | intron_variant                                                                                     |
| rs918574380 | intron_variant                                                                                     |
| rs918582413 | genic_upstream_transcript_variant,intron_variant                                                   |
| rs918588728 | genic_downstream_transcript_variant,intron_variant                                                 |
| rs918608179 | intron_variant                                                                                     |
| rs918619944 | genic_downstream_transcript_variant,intron_variant                                                 |
| rs918643502 | genic_upstream_transcript_variant,intron_variant                                                   |
| rs918698222 | intron_variant                                                                                     |
| rs918708751 | intron_variant                                                                                     |
| rs918723979 | intron_variant                                                                                     |
| rs918728162 | genic_upstream_transcript_variant,intron_variant                                                   |
| rs918744668 | intron_variant                                                                                     |
| rs918764980 | genic_upstream_transcript_variant,intron_variant                                                   |
| rs918866159 | genic_upstream_transcript_variant,intron_variant                                                   |
| rs918869085 | intron_variant                                                                                     |
| rs918916843 | genic_upstream_transcript_variant,intron_variant                                                   |
| rs918925719 | 3_prime_UTR_variant,non_coding_transcript_variant,genic_downstream_transcript_variant              |
| rs918928864 | intron_variant                                                                                     |
| rs918956919 | 3_prime_UTR_variant,non_coding_transcript_variant,genic_downstream_transcript_variant              |
| rs919031461 | intron_variant                                                                                     |
| rs919032220 | genic_downstream_transcript_variant,intron_variant                                                 |
| rs919047306 | genic_upstream_transcript_variant,intron_variant                                                   |
| rs919050790 | intron_variant                                                                                     |
| rs919061704 | 500B_downstream_variant,downstream_transcript_variant                                              |
| rs919080129 | intron_variant                                                                                     |
| rs919112304 | genic_upstream_transcript_variant,intron_variant                                                   |
| rs919152271 | intron_variant                                                                                     |
| rs919170347 | genic_upstream_transcript_variant,intron_variant                                                   |
| rs919199760 | genic_upstream_transcript_variant,intron_variant                                                   |
| rs919208026 | intron_variant                                                                                     |
| rs919208770 | 500B_downstream_variant,downstream_transcript_variant                                              |
| rs919222827 | genic_upstream_transcript_variant,intron_variant                                                   |
| rs919285204 | genic_downstream_transcript_variant,intron_variant                                                 |
| rs919293448 | intron_variant                                                                                     |
| rs919298676 | intron_variant                                                                                     |
| rs919303283 | intron_variant                                                                                     |
| rs919335453 | genic_upstream_transcript_variant,intron_variant                                                   |
| rs919415389 | 2KB_upstream_variant,genic_upstream_transcript_variant,upstream_transcript_variant,intron_variant  |
| rs919420042 | genic_upstream_transcript_variant,intron_variant                                                   |
| rs919427044 | intron_variant                                                                                     |
| rs919431318 | genic_upstream_transcript_variant,intron_variant                                                   |
| rs919472633 | intron_variant                                                                                     |
| rs919515421 | intron_variant,non_coding_transcript_variant,genic_upstream_transcript_variant,5_prime_UTR_variant |
| rs919542193 | intron_variant                                                                                     |
| rs919556031 | genic_downstream_transcript_variant,intron_variant                                                 |
| rs919573498 | intron_variant                                                                                     |
| rs919578761 | intron_variant                                                                                     |
| rs919622387 | intron_variant                                                                                     |
| rs919640764 | genic_upstream_transcript_variant,intron_variant                                                   |
| rs919722927 | genic_upstream_transcript_variant,intron_variant                                                   |
| rs919729848 | genic_upstream_transcript_variant,intron_variant                                                   |
| rs919730536 | intron_variant                                                                                     |
| rs919735808 | genic_downstream_transcript_variant,intron_variant                                                 |
| rs919751471 | intron_variant                                                                                     |
| rs919826117 | intron_variant                                                                                     |
| rs919828985 | genic_downstream_transcript_variant,intron_variant                                                 |

|             |                                                                                                                           |
|-------------|---------------------------------------------------------------------------------------------------------------------------|
| rs919881814 | intron_variant                                                                                                            |
| rs919896979 | genic_upstream_transcript_variant,intron_variant                                                                          |
| rs919939712 | 2KB_upstream_variant,upstream_transcript_variant,genic_upstream_transcript_variant,intron_variant                         |
| rs919957711 | intron_variant                                                                                                            |
| rs919968749 | intron_variant                                                                                                            |
| rs919974203 | intron_variant                                                                                                            |
| rs919982616 | intron_variant                                                                                                            |
| rs919984435 | genic_downstream_transcript_variant,intron_variant                                                                        |
| rs919987914 | genic_upstream_transcript_variant,intron_variant                                                                          |
| rs919994891 | genic_upstream_transcript_variant,intron_variant                                                                          |
| rs920016453 | genic_upstream_transcript_variant,intron_variant                                                                          |
| rs920051085 | genic_upstream_transcript_variant,intron_variant                                                                          |
| rs920057591 | genic_upstream_transcript_variant,intron_variant                                                                          |
| rs920062693 | genic_downstream_transcript_variant,intron_variant                                                                        |
| rs920082797 | genic_upstream_transcript_variant,intron_variant                                                                          |
| rs920113030 | intron_variant                                                                                                            |
| rs920139811 | intron_variant                                                                                                            |
| rs920198928 | genic_upstream_transcript_variant,intron_variant                                                                          |
| rs920201575 | genic_upstream_transcript_variant,intron_variant                                                                          |
| rs920206176 | genic_upstream_transcript_variant,intron_variant                                                                          |
| rs920231551 | genic_upstream_transcript_variant,intron_variant                                                                          |
| rs920256194 | genic_upstream_transcript_variant,intron_variant                                                                          |
| rs920272373 | intron_variant                                                                                                            |
| rs920300950 | intron_variant                                                                                                            |
| rs920317979 | genic_downstream_transcript_variant,intron_variant                                                                        |
| rs920326133 | genic_upstream_transcript_variant,intron_variant                                                                          |
| rs920326927 | genic_upstream_transcript_variant,intron_variant                                                                          |
| rs920370314 | genic_upstream_transcript_variant,intron_variant                                                                          |
| rs920415889 | genic_downstream_transcript_variant,intron_variant                                                                        |
| rs920432619 | intron_variant                                                                                                            |
| rs920447018 | intron_variant                                                                                                            |
| rs920495205 | genic_upstream_transcript_variant,intron_variant                                                                          |
| rs920510243 | genic_downstream_transcript_variant,intron_variant                                                                        |
| rs920518217 | genic_downstream_transcript_variant,intron_variant                                                                        |
| rs920524879 | genic_upstream_transcript_variant,intron_variant                                                                          |
| rs920556863 | genic_downstream_transcript_variant,intron_variant                                                                        |
| rs920569453 | intron_variant                                                                                                            |
| rs920585471 | genic_upstream_transcript_variant,intron_variant                                                                          |
| rs920624124 | 3_prime_UTR_variant,non_coding_transcript_variant,genic_downstream_transcript_variant                                     |
| rs920681675 | intron_variant                                                                                                            |
| rs920694371 | genic_downstream_transcript_variant,intron_variant                                                                        |
| rs920701199 | intron_variant                                                                                                            |
| rs920771440 | genic_upstream_transcript_variant,intron_variant                                                                          |
| rs920796955 | intron_variant                                                                                                            |
| rs920800479 | genic_downstream_transcript_variant,intron_variant                                                                        |
| rs920813492 | intron_variant                                                                                                            |
| rs920820231 | intron_variant                                                                                                            |
| rs920879647 | intron_variant                                                                                                            |
| rs920936580 | intron_variant                                                                                                            |
| rs920972078 | genic_upstream_transcript_variant,intron_variant                                                                          |
| rs921005909 | intron_variant                                                                                                            |
| rs921016438 | intron_variant                                                                                                            |
| rs921022512 | genic_downstream_transcript_variant,intron_variant                                                                        |
| rs921047335 | intron_variant                                                                                                            |
| rs921066767 | genic_downstream_transcript_variant,intron_variant                                                                        |
| rs921069794 | genic_downstream_transcript_variant,intron_variant                                                                        |
| rs921087397 | intron_variant                                                                                                            |
| rs921156067 | genic_upstream_transcript_variant,intron_variant                                                                          |
| rs921187083 | genic_upstream_transcript_variant,intron_variant                                                                          |
| rs921189227 | coding_sequence_variant,non_coding_transcript_variant,genic_upstream_transcript_variant,intron_variant,synonymous_variant |
| rs921212455 | genic_downstream_transcript_variant,intron_variant                                                                        |
| rs921226256 | genic_upstream_transcript_variant,intron_variant                                                                          |
| rs921259951 | intron_variant                                                                                                            |
| rs921278710 | genic_upstream_transcript_variant,intron_variant                                                                          |
| rs921286355 | genic_downstream_transcript_variant,intron_variant                                                                        |
| rs921304940 | genic_upstream_transcript_variant,intron_variant                                                                          |
| rs921308683 | synonymous_variant,coding_sequence_variant,non_coding_transcript_variant                                                  |
| rs921310635 | intron_variant                                                                                                            |
| rs921322399 | 5_prime_UTR_variant,intron_variant                                                                                        |
| rs921454521 | downstream_transcript_variant,genic_downstream_transcript_variant,intron_variant                                          |
| rs921460883 | genic_upstream_transcript_variant,intron_variant                                                                          |
| rs921554392 | intron_variant                                                                                                            |
| rs921579402 | intron_variant                                                                                                            |
| rs921601805 | intron_variant                                                                                                            |

|             |                                                                                                   |
|-------------|---------------------------------------------------------------------------------------------------|
| rs921667765 | genic_upstream_transcript_variant,intron_variant                                                  |
| rs921669580 | intron_variant                                                                                    |
| rs921709092 | genic_upstream_transcript_variant,intron_variant                                                  |
| rs921738226 | genic_upstream_transcript_variant,intron_variant                                                  |
| rs921788374 | genic_upstream_transcript_variant,intron_variant                                                  |
| rs921807110 | intron_variant                                                                                    |
| rs921809935 | genic_upstream_transcript_variant,intron_variant                                                  |
| rs921879528 | genic_upstream_transcript_variant,intron_variant                                                  |
| rs921880275 | intron_variant                                                                                    |
| rs921891195 | genic_downstream_transcript_variant,intron_variant                                                |
| rs921949099 | genic_upstream_transcript_variant,intron_variant                                                  |
| rs921951210 | intron_variant                                                                                    |
| rs921953439 | genic_downstream_transcript_variant,intron_variant                                                |
| rs921982287 | intron_variant                                                                                    |
| rs921990959 | intron_variant                                                                                    |
| rs922022359 | genic_downstream_transcript_variant,intron_variant                                                |
| rs922031581 | intron_variant                                                                                    |
| rs922044024 | genic_upstream_transcript_variant,intron_variant                                                  |
| rs922068583 | intron_variant                                                                                    |
| rs922074233 | 3_prime_UTR_variant,non_coding_transcript_variant,genic_downstream_transcript_variant             |
| rs922090178 | genic_upstream_transcript_variant,intron_variant                                                  |
| rs922132444 | intron_variant                                                                                    |
| rs922165292 | genic_downstream_transcript_variant,intron_variant                                                |
| rs922177645 | 500B_downstream_variant,downstream_transcript_variant                                             |
| rs922179075 | genic_downstream_transcript_variant,intron_variant                                                |
| rs922260812 | intron_variant                                                                                    |
| rs922260960 | genic_upstream_transcript_variant,intron_variant                                                  |
| rs922268420 | genic_upstream_transcript_variant,intron_variant                                                  |
| rs922300636 | genic_upstream_transcript_variant,intron_variant                                                  |
| rs922306353 | genic_upstream_transcript_variant,intron_variant                                                  |
| rs922334820 | genic_downstream_transcript_variant,intron_variant                                                |
| rs922393106 | genic_upstream_transcript_variant,intron_variant                                                  |
| rs922406011 | intron_variant                                                                                    |
| rs922457335 | genic_upstream_transcript_variant,intron_variant                                                  |
| rs922476976 | genic_upstream_transcript_variant,intron_variant                                                  |
| rs922540644 | genic_upstream_transcript_variant,intron_variant                                                  |
| rs922551308 | genic_upstream_transcript_variant,intron_variant                                                  |
| rs922563967 | genic_downstream_transcript_variant,intron_variant                                                |
| rs922583789 | genic_downstream_transcript_variant,intron_variant                                                |
| rs922626528 | genic_upstream_transcript_variant,intron_variant                                                  |
| rs922630107 | genic_upstream_transcript_variant,intron_variant                                                  |
| rs922675980 | genic_downstream_transcript_variant,intron_variant                                                |
| rs922705007 | intron_variant                                                                                    |
| rs922705451 | 2KB_upstream_variant,upstream_transcript_variant,genic_upstream_transcript_variant,intron_variant |
| rs922720391 | genic_downstream_transcript_variant,intron_variant                                                |
| rs922751954 | intron_variant                                                                                    |
| rs922769384 | genic_upstream_transcript_variant,intron_variant                                                  |
| rs922788826 | genic_upstream_transcript_variant,intron_variant                                                  |
| rs922827735 | genic_downstream_transcript_variant,intron_variant                                                |
| rs922827882 | genic_downstream_transcript_variant,intron_variant                                                |
| rs922834704 | genic_downstream_transcript_variant,intron_variant                                                |
| rs922839547 | intron_variant                                                                                    |
| rs922853141 | 2KB_upstream_variant,upstream_transcript_variant,genic_upstream_transcript_variant,intron_variant |
| rs922910720 | genic_downstream_transcript_variant,intron_variant                                                |
| rs922954878 | genic_upstream_transcript_variant,intron_variant                                                  |
| rs922958823 | intron_variant                                                                                    |
| rs922985827 | intron_variant                                                                                    |
| rs923006469 | 2KB_upstream_variant,upstream_transcript_variant,genic_upstream_transcript_variant,intron_variant |
| rs923027877 | genic_downstream_transcript_variant,intron_variant                                                |
| rs923035312 | genic_downstream_transcript_variant,intron_variant                                                |
| rs923038187 | intron_variant                                                                                    |
| rs923064685 | intron_variant                                                                                    |
| rs923090337 | intron_variant                                                                                    |
| rs923097564 | genic_downstream_transcript_variant,intron_variant                                                |
| rs923129190 | genic_downstream_transcript_variant,intron_variant                                                |
| rs923139107 | intron_variant                                                                                    |
| rs923169099 | genic_downstream_transcript_variant,intron_variant                                                |
| rs923184253 | intron_variant                                                                                    |
| rs923223329 | genic_downstream_transcript_variant,intron_variant                                                |
| rs923242112 | genic_upstream_transcript_variant,intron_variant                                                  |
| rs923267515 | intron_variant                                                                                    |
| rs923268465 | intron_variant                                                                                    |
| rs923279269 | intron_variant                                                                                    |
| rs923320510 | intron_variant                                                                                    |

|             |                                                                                                   |
|-------------|---------------------------------------------------------------------------------------------------|
| rs923387824 | genic_upstream_transcript_variant,intron_variant                                                  |
| rs923409372 | genic_upstream_transcript_variant,intron_variant                                                  |
| rs923436472 | 3_prime_UTR_variant,non_coding_transcript_variant,genic_downstream_transcript_variant             |
| rs923480989 | intron_variant                                                                                    |
| rs923486647 | genic_upstream_transcript_variant,intron_variant                                                  |
| rs923492230 | genic_upstream_transcript_variant,intron_variant                                                  |
| rs923514626 | genic_upstream_transcript_variant,upstream_transcript_variant,intron_variant                      |
| rs923523897 | genic_upstream_transcript_variant,intron_variant                                                  |
| rs923549688 | intron_variant                                                                                    |
| rs923552713 | genic_upstream_transcript_variant,intron_variant                                                  |
| rs923564494 | genic_upstream_transcript_variant,intron_variant                                                  |
| rs923593178 | genic_upstream_transcript_variant,intron_variant                                                  |
| rs923603015 | intron_variant                                                                                    |
| rs923606360 | intron_variant                                                                                    |
| rs923658536 | intron_variant                                                                                    |
| rs923668358 | 2KB_upstream_variant,upstream_transcript_variant,genic_upstream_transcript_variant,intron_variant |
| rs923699353 | 2KB_upstream_variant,upstream_transcript_variant,genic_upstream_transcript_variant,intron_variant |
| rs923730264 | intron_variant                                                                                    |
| rs923736003 | genic_upstream_transcript_variant,intron_variant                                                  |
| rs923756566 | intron_variant                                                                                    |
| rs923774410 | genic_downstream_transcript_variant,intron_variant                                                |
| rs923808076 | intron_variant                                                                                    |
| rs923920109 | intron_variant                                                                                    |
| rs923920860 | genic_upstream_transcript_variant,intron_variant                                                  |
| rs923953189 | genic_downstream_transcript_variant,intron_variant                                                |
| rs923968295 | intron_variant                                                                                    |
| rs923982426 | intron_variant                                                                                    |
| rs923996498 | genic_downstream_transcript_variant,intron_variant                                                |
| rs924015604 | genic_upstream_transcript_variant,intron_variant                                                  |
| rs924019460 | genic_upstream_transcript_variant,intron_variant                                                  |
| rs924029879 | genic_upstream_transcript_variant,intron_variant                                                  |
| rs924047709 | genic_upstream_transcript_variant,intron_variant                                                  |
| rs924050385 | genic_upstream_transcript_variant,intron_variant                                                  |
| rs924059939 | intron_variant                                                                                    |
| rs924062304 | intron_variant                                                                                    |
| rs924084968 | intron_variant                                                                                    |
| rs924116195 | intron_variant                                                                                    |
| rs924136556 | intron_variant                                                                                    |
| rs924150891 | genic_downstream_transcript_variant,intron_variant                                                |
| rs924155302 | intron_variant                                                                                    |
| rs924158629 | intron_variant                                                                                    |
| rs924202583 | intron_variant                                                                                    |
| rs924206123 | genic_upstream_transcript_variant,intron_variant                                                  |
| rs924254686 | genic_upstream_transcript_variant,intron_variant                                                  |
| rs924328629 | genic_downstream_transcript_variant,intron_variant                                                |
| rs924338967 | genic_downstream_transcript_variant,intron_variant                                                |
| rs924343847 | intron_variant                                                                                    |
| rs924352886 | genic_upstream_transcript_variant,intron_variant                                                  |
| rs924354091 | genic_upstream_transcript_variant,upstream_transcript_variant,intron_variant                      |
| rs924371282 | genic_upstream_transcript_variant,intron_variant                                                  |
| rs924393170 | intron_variant                                                                                    |
| rs924421404 | intron_variant                                                                                    |
| rs924432259 | genic_upstream_transcript_variant,intron_variant                                                  |
| rs924463940 | genic_downstream_transcript_variant,intron_variant                                                |
| rs924493368 | intron_variant                                                                                    |
| rs924502271 | intron_variant                                                                                    |
| rs924540146 | genic_upstream_transcript_variant,intron_variant                                                  |
| rs924544589 | genic_downstream_transcript_variant,intron_variant                                                |
| rs924548134 | genic_downstream_transcript_variant,intron_variant                                                |
| rs924568051 | genic_upstream_transcript_variant,intron_variant                                                  |
| rs924584903 | intron_variant                                                                                    |
| rs924608376 | genic_upstream_transcript_variant,intron_variant                                                  |
| rs924616165 | intron_variant                                                                                    |
| rs924649132 | genic_upstream_transcript_variant,intron_variant                                                  |
| rs924672361 | intron_variant                                                                                    |
| rs924682814 | genic_upstream_transcript_variant,intron_variant                                                  |
| rs924750366 | genic_downstream_transcript_variant,intron_variant                                                |
| rs924756623 | 2KB_upstream_variant,genic_upstream_transcript_variant,upstream_transcript_variant,intron_variant |
| rs924758599 | genic_upstream_transcript_variant,intron_variant                                                  |
| rs924856510 | intron_variant                                                                                    |
| rs924885354 | genic_upstream_transcript_variant,intron_variant                                                  |
| rs924903596 | genic_upstream_transcript_variant,intron_variant                                                  |
| rs924927810 | synonymous_variant,coding_sequence_variant,non_coding_transcript_variant                          |
| rs924930566 | intron_variant                                                                                    |

|             |                                                                                                                           |
|-------------|---------------------------------------------------------------------------------------------------------------------------|
| rs924933913 | genic_downstream_transcript_variant,intron_variant                                                                        |
| rs924952572 | genic_upstream_transcript_variant,intron_variant                                                                          |
| rs924977777 | intron_variant                                                                                                            |
| rs925000327 | intron_variant                                                                                                            |
| rs925008196 | genic_downstream_transcript_variant,intron_variant                                                                        |
| rs925023828 | intron_variant                                                                                                            |
| rs925056402 | 2KB_upstream_variant,upstream_transcript_variant,genic_upstream_transcript_variant,intron_variant                         |
| rs925142579 | genic_downstream_transcript_variant,intron_variant                                                                        |
| rs925167176 | intron_variant                                                                                                            |
| rs925198992 | genic_downstream_transcript_variant,intron_variant                                                                        |
| rs925273640 | genic_downstream_transcript_variant,intron_variant                                                                        |
| rs925278724 | genic_upstream_transcript_variant,intron_variant                                                                          |
| rs925281081 | intron_variant                                                                                                            |
| rs925285894 | genic_upstream_transcript_variant,intron_variant                                                                          |
| rs925290877 | intron_variant                                                                                                            |
| rs925313384 | genic_downstream_transcript_variant,intron_variant                                                                        |
| rs925327245 | intron_variant                                                                                                            |
| rs925342998 | intron_variant                                                                                                            |
| rs925369946 | genic_upstream_transcript_variant,intron_variant                                                                          |
| rs925444992 | genic_upstream_transcript_variant,intron_variant                                                                          |
| rs925448141 | intron_variant                                                                                                            |
| rs925450383 | genic_downstream_transcript_variant,intron_variant                                                                        |
| rs925457252 | intron_variant                                                                                                            |
| rs925465969 | genic_upstream_transcript_variant,intron_variant                                                                          |
| rs925481557 | genic_downstream_transcript_variant,intron_variant                                                                        |
| rs925516841 | genic_upstream_transcript_variant,intron_variant                                                                          |
| rs925519668 | genic_downstream_transcript_variant,intron_variant                                                                        |
| rs925535398 | intron_variant                                                                                                            |
| rs925569878 | genic_upstream_transcript_variant,intron_variant                                                                          |
| rs925600985 | coding_sequence_variant,non_coding_transcript_variant,genic_upstream_transcript_variant,intron_variant,synonymous_variant |
| rs925603654 | genic_downstream_transcript_variant,intron_variant                                                                        |
| rs925606318 | intron_variant                                                                                                            |
| rs925616952 | intron_variant                                                                                                            |
| rs925633329 | genic_downstream_transcript_variant,intron_variant                                                                        |
| rs925669416 | intron_variant                                                                                                            |
| rs925752133 | intron_variant                                                                                                            |
| rs925800078 | genic_upstream_transcript_variant,intron_variant                                                                          |
| rs925805779 | intron_variant                                                                                                            |
| rs925809690 | genic_upstream_transcript_variant,intron_variant                                                                          |
| rs925879253 | genic_downstream_transcript_variant,intron_variant                                                                        |
| rs925906618 | genic_upstream_transcript_variant,intron_variant                                                                          |
| rs925923114 | genic_upstream_transcript_variant,intron_variant                                                                          |
| rs925951580 | downstream_transcript_variant,genic_downstream_transcript_variant,intron_variant                                          |
| rs925976994 | genic_upstream_transcript_variant,intron_variant                                                                          |
| rs926003759 | downstream_transcript_variant,genic_downstream_transcript_variant,intron_variant                                          |
| rs926053303 | intron_variant                                                                                                            |
| rs926065995 | intron_variant                                                                                                            |
| rs926131179 | intron_variant                                                                                                            |
| rs926134896 | genic_upstream_transcript_variant,intron_variant                                                                          |
| rs926144902 | genic_downstream_transcript_variant,intron_variant                                                                        |
| rs926166084 | intron_variant                                                                                                            |
| rs926204812 | genic_upstream_transcript_variant,intron_variant                                                                          |
| rs926236468 | intron_variant                                                                                                            |
| rs926245421 | intron_variant                                                                                                            |
| rs926293635 | intron_variant                                                                                                            |
| rs926303119 | genic_upstream_transcript_variant,intron_variant                                                                          |
| rs926330054 | intron_variant                                                                                                            |
| rs926341970 | genic_downstream_transcript_variant,intron_variant                                                                        |
| rs926368109 | intron_variant                                                                                                            |
| rs926437293 | intron_variant                                                                                                            |
| rs926438171 | genic_upstream_transcript_variant,intron_variant                                                                          |
| rs926454984 | intron_variant                                                                                                            |
| rs926473109 | genic_downstream_transcript_variant,intron_variant                                                                        |
| rs926534593 | intron_variant                                                                                                            |
| rs926537388 | intron_variant                                                                                                            |
| rs926545347 | genic_upstream_transcript_variant,intron_variant                                                                          |
| rs926553157 | intron_variant                                                                                                            |
| rs926581715 | genic_upstream_transcript_variant,intron_variant                                                                          |
| rs926587655 | intron_variant                                                                                                            |
| rs926610325 | genic_downstream_transcript_variant,intron_variant                                                                        |
| rs926620065 | genic_upstream_transcript_variant,intron_variant                                                                          |
| rs926666909 | intron_variant                                                                                                            |
| rs926683171 | genic_upstream_transcript_variant,intron_variant                                                                          |
| rs926699162 | intron_variant                                                                                                            |

|             |                                                                                                   |
|-------------|---------------------------------------------------------------------------------------------------|
| rs926701098 | genic_downstream_transcript_variant,intron_variant                                                |
| rs926714469 | genic_upstream_transcript_variant,intron_variant                                                  |
| rs926758874 | genic_upstream_transcript_variant,intron_variant                                                  |
| rs926789863 | genic_upstream_transcript_variant,intron_variant                                                  |
| rs926790715 | intron_variant                                                                                    |
| rs926808396 | intron_variant                                                                                    |
| rs926817290 | genic_downstream_transcript_variant,intron_variant                                                |
| rs926841782 | intron_variant                                                                                    |
| rs926842757 | intron_variant                                                                                    |
| rs926891078 | genic_downstream_transcript_variant,intron_variant                                                |
| rs926911853 | genic_downstream_transcript_variant,intron_variant                                                |
| rs926920720 | intron_variant                                                                                    |
| rs926931415 | genic_upstream_transcript_variant,intron_variant                                                  |
| rs926949147 | 3_prime_UTR_variant,non_coding_transcript_variant,genic_downstream_transcript_variant             |
| rs927012268 | genic_downstream_transcript_variant,intron_variant                                                |
| rs927015969 | genic_upstream_transcript_variant,intron_variant                                                  |
| rs927036342 | intron_variant                                                                                    |
| rs927037596 | genic_downstream_transcript_variant,intron_variant                                                |
| rs927046782 | genic_upstream_transcript_variant,intron_variant                                                  |
| rs927060608 | intron_variant                                                                                    |
| rs927118475 | intron_variant                                                                                    |
| rs927150828 | genic_downstream_transcript_variant,intron_variant                                                |
| rs927158129 | intron_variant                                                                                    |
| rs927192113 | genic_upstream_transcript_variant,intron_variant                                                  |
| rs927215348 | genic_downstream_transcript_variant,intron_variant                                                |
| rs927283322 | intron_variant                                                                                    |
| rs927304946 | downstream_transcript_variant,genic_downstream_transcript_variant,intron_variant                  |
| rs927345571 | intron_variant                                                                                    |
| rs927372677 | 2KB_upstream_variant,genic_upstream_transcript_variant,upstream_transcript_variant,intron_variant |
| rs927383889 | genic_upstream_transcript_variant,intron_variant                                                  |
| rs927392520 | genic_upstream_transcript_variant,intron_variant                                                  |
| rs927397966 | genic_upstream_transcript_variant,intron_variant                                                  |
| rs927404705 | genic_upstream_transcript_variant,intron_variant                                                  |
| rs927417354 | intron_variant                                                                                    |
| rs927420616 | intron_variant                                                                                    |
| rs927432176 | genic_upstream_transcript_variant,intron_variant                                                  |
| rs927457584 | intron_variant                                                                                    |
| rs927479921 | intron_variant                                                                                    |
| rs927534086 | intron_variant                                                                                    |
| rs927546781 | genic_upstream_transcript_variant,intron_variant                                                  |
| rs927547431 | genic_upstream_transcript_variant,intron_variant                                                  |
| rs927557154 | genic_upstream_transcript_variant,intron_variant                                                  |
| rs927590177 | genic_upstream_transcript_variant,intron_variant                                                  |
| rs927663542 | genic_downstream_transcript_variant,intron_variant                                                |
| rs927692772 | genic_upstream_transcript_variant,intron_variant                                                  |
| rs927700399 | genic_upstream_transcript_variant,intron_variant                                                  |
| rs927709732 | genic_downstream_transcript_variant,intron_variant                                                |
| rs927733936 | intron_variant                                                                                    |
| rs927741929 | genic_upstream_transcript_variant,intron_variant                                                  |
| rs927757514 | intron_variant                                                                                    |
| rs927830043 | intron_variant                                                                                    |
| rs927858957 | genic_upstream_transcript_variant,intron_variant                                                  |
| rs927893511 | genic_downstream_transcript_variant,intron_variant                                                |
| rs927928194 | genic_upstream_transcript_variant,intron_variant                                                  |
| rs927948152 | genic_upstream_transcript_variant,intron_variant                                                  |
| rs927948686 | intron_variant                                                                                    |
| rs927985338 | genic_upstream_transcript_variant,intron_variant                                                  |
| rs928006673 | genic_upstream_transcript_variant,intron_variant                                                  |
| rs928007892 | 3_prime_UTR_variant,non_coding_transcript_variant,genic_downstream_transcript_variant             |
| rs928062812 | intron_variant                                                                                    |
| rs928075396 | 3_prime_UTR_variant,non_coding_transcript_variant,genic_downstream_transcript_variant             |
| rs928085918 | intron_variant                                                                                    |
| rs928102594 | genic_upstream_transcript_variant,intron_variant                                                  |
| rs928156361 | genic_upstream_transcript_variant,intron_variant                                                  |
| rs928178624 | intron_variant                                                                                    |
| rs928190382 | intron_variant                                                                                    |
| rs928208607 | genic_upstream_transcript_variant,intron_variant                                                  |
| rs928227616 | intron_variant                                                                                    |
| rs928241775 | intron_variant                                                                                    |
| rs928261285 | genic_upstream_transcript_variant,intron_variant                                                  |
| rs928283513 | 2KB_upstream_variant,genic_upstream_transcript_variant,upstream_transcript_variant,intron_variant |
| rs928284514 | genic_upstream_transcript_variant,intron_variant                                                  |
| rs928287177 | intron_variant                                                                                    |
| rs928304839 | intron_variant                                                                                    |

|             |                                                                                                   |
|-------------|---------------------------------------------------------------------------------------------------|
| rs928307784 | genic_upstream_transcript_variant,intron_variant                                                  |
| rs928316199 | 2KB_upstream_variant,genic_upstream_transcript_variant,upstream_transcript_variant,intron_variant |
| rs928423686 | intron_variant                                                                                    |
| rs928460602 | 2KB_upstream_variant,genic_upstream_transcript_variant,upstream_transcript_variant,intron_variant |
| rs928490758 | genic_upstream_transcript_variant,intron_variant                                                  |
| rs928522259 | intron_variant                                                                                    |
| rs928541105 | intron_variant                                                                                    |
| rs928542592 | intron_variant                                                                                    |
| rs928597761 | genic_upstream_transcript_variant,intron_variant                                                  |
| rs928611804 | genic_downstream_transcript_variant,intron_variant                                                |
| rs928620871 | genic_upstream_transcript_variant,intron_variant                                                  |
| rs928625687 | intron_variant                                                                                    |
| rs928663332 | intron_variant                                                                                    |
| rs928673569 | intron_variant                                                                                    |
| rs928674072 | genic_downstream_transcript_variant,intron_variant                                                |
| rs928694319 | genic_upstream_transcript_variant,intron_variant                                                  |
| rs928708977 | genic_upstream_transcript_variant,intron_variant                                                  |
| rs928750441 | intron_variant                                                                                    |
| rs928773864 | intron_variant                                                                                    |
| rs928783802 | genic_upstream_transcript_variant,intron_variant                                                  |
| rs928793603 | genic_upstream_transcript_variant,intron_variant                                                  |
| rs928804674 | intron_variant                                                                                    |
| rs928810149 | genic_downstream_transcript_variant,intron_variant                                                |
| rs928810617 | genic_downstream_transcript_variant,intron_variant                                                |
| rs928830398 | genic_downstream_transcript_variant,intron_variant                                                |
| rs928839079 | genic_downstream_transcript_variant,intron_variant                                                |
| rs928910154 | genic_downstream_transcript_variant,intron_variant                                                |
| rs928925693 | genic_upstream_transcript_variant,intron_variant                                                  |
| rs928946706 | genic_downstream_transcript_variant,intron_variant                                                |
| rs928947941 | intron_variant                                                                                    |
| rs929007225 | genic_downstream_transcript_variant,intron_variant                                                |
| rs929061044 | genic_downstream_transcript_variant,intron_variant                                                |
| rs929062349 | intron_variant                                                                                    |
| rs929104113 | genic_downstream_transcript_variant,intron_variant                                                |
| rs929158643 | intron_variant                                                                                    |
| rs929212431 | intron_variant                                                                                    |
| rs929223281 | genic_upstream_transcript_variant,intron_variant                                                  |
| rs929233874 | 3_prime_UTR_variant,non_coding_transcript_variant,genic_downstream_transcript_variant             |
| rs929297936 | genic_downstream_transcript_variant,intron_variant                                                |
| rs929303688 | genic_upstream_transcript_variant,intron_variant                                                  |
| rs929304210 | genic_downstream_transcript_variant,intron_variant                                                |
| rs929304849 | intron_variant                                                                                    |
| rs929314743 | intron_variant                                                                                    |
| rs929353907 | genic_upstream_transcript_variant,intron_variant                                                  |
| rs929386021 | genic_upstream_transcript_variant,intron_variant                                                  |
| rs929428563 | intron_variant                                                                                    |
| rs929433558 | genic_upstream_transcript_variant,intron_variant                                                  |
| rs929439525 | genic_downstream_transcript_variant,intron_variant                                                |
| rs929550389 | genic_downstream_transcript_variant,intron_variant                                                |
| rs929555798 | intron_variant                                                                                    |
| rs929582729 | genic_upstream_transcript_variant,intron_variant                                                  |
| rs929583634 | intron_variant                                                                                    |
| rs929607430 | intron_variant                                                                                    |
| rs929608828 | genic_downstream_transcript_variant,intron_variant                                                |
| rs929638343 | genic_downstream_transcript_variant,intron_variant                                                |
| rs929658424 | intron_variant                                                                                    |
| rs929663031 | genic_upstream_transcript_variant,intron_variant                                                  |
| rs929676740 | genic_upstream_transcript_variant,intron_variant                                                  |
| rs929676819 | intron_variant                                                                                    |
| rs929686930 | genic_upstream_transcript_variant,intron_variant                                                  |
| rs929700340 | intron_variant                                                                                    |
| rs929745507 | genic_upstream_transcript_variant,intron_variant                                                  |
| rs929748934 | genic_downstream_transcript_variant,intron_variant                                                |
| rs929779047 | genic_upstream_transcript_variant,intron_variant                                                  |
| rs929829081 | genic_downstream_transcript_variant,intron_variant                                                |
| rs929864380 | genic_downstream_transcript_variant,intron_variant                                                |
| rs929879598 | intron_variant                                                                                    |
| rs929905398 | genic_downstream_transcript_variant,intron_variant                                                |
| rs929913263 | genic_upstream_transcript_variant,intron_variant                                                  |
| rs929924906 | genic_downstream_transcript_variant,intron_variant                                                |
| rs929940189 | intron_variant                                                                                    |
| rs929945796 | genic_upstream_transcript_variant,intron_variant                                                  |
| rs929986481 | intron_variant                                                                                    |
| rs929990973 | intron_variant                                                                                    |

|             |                                                                                                   |
|-------------|---------------------------------------------------------------------------------------------------|
| rs929999641 | genic_upstream_transcript_variant,intron_variant                                                  |
| rs930055699 | intron_variant                                                                                    |
| rs930095992 | genic_upstream_transcript_variant,intron_variant                                                  |
| rs930126270 | intron_variant                                                                                    |
| rs930144218 | genic_upstream_transcript_variant,intron_variant                                                  |
| rs930152434 | intron_variant                                                                                    |
| rs930161646 | downstream_transcript_variant,genic_downstream_transcript_variant,intron_variant                  |
| rs930166195 | intron_variant                                                                                    |
| rs930169564 | genic_upstream_transcript_variant,intron_variant                                                  |
| rs930188016 | genic_upstream_transcript_variant,intron_variant                                                  |
| rs930188876 | genic_upstream_transcript_variant,intron_variant                                                  |
| rs930244833 | genic_upstream_transcript_variant,intron_variant                                                  |
| rs930247826 | intron_variant                                                                                    |
| rs930284423 | genic_upstream_transcript_variant,intron_variant                                                  |
| rs930297676 | intron_variant                                                                                    |
| rs930339633 | genic_upstream_transcript_variant,intron_variant                                                  |
| rs930356306 | genic_upstream_transcript_variant,intron_variant                                                  |
| rs930403954 | genic_downstream_transcript_variant,intron_variant                                                |
| rs930411127 | intron_variant                                                                                    |
| rs930436947 | genic_downstream_transcript_variant,intron_variant                                                |
| rs930441899 | intron_variant                                                                                    |
| rs930474300 | intron_variant                                                                                    |
| rs930521755 | genic_upstream_transcript_variant,intron_variant                                                  |
| rs930559570 | genic_downstream_transcript_variant,intron_variant                                                |
| rs930597378 | intron_variant                                                                                    |
| rs930614450 | genic_upstream_transcript_variant,intron_variant                                                  |
| rs930636193 | genic_upstream_transcript_variant,2KB_upstream_variant,upstream_transcript_variant,intron_variant |
| rs930685638 | intron_variant                                                                                    |
| rs930701717 | intron_variant                                                                                    |
| rs930705957 | genic_downstream_transcript_variant,intron_variant                                                |
| rs930724085 | intron_variant                                                                                    |
| rs930736533 | intron_variant                                                                                    |
| rs930755581 | intron_variant                                                                                    |
| rs930850673 | intron_variant                                                                                    |
| rs930874808 | 3_prime_UTR_variant,genic_downstream_transcript_variant,non_coding_transcript_variant             |
| rs930902737 | genic_upstream_transcript_variant,intron_variant                                                  |
| rs930916473 | genic_upstream_transcript_variant,intron_variant                                                  |
| rs931008116 | genic_upstream_transcript_variant,intron_variant                                                  |
| rs931015077 | intron_variant                                                                                    |
| rs931039749 | genic_upstream_transcript_variant,intron_variant                                                  |
| rs931042367 | intron_variant                                                                                    |
| rs931050535 | intron_variant                                                                                    |
| rs931060865 | genic_upstream_transcript_variant,intron_variant                                                  |
| rs931146625 | genic_upstream_transcript_variant,intron_variant                                                  |
| rs931177843 | genic_downstream_transcript_variant,intron_variant                                                |
| rs931180758 | intron_variant                                                                                    |
| rs931224167 | genic_upstream_transcript_variant,intron_variant                                                  |
| rs931233987 | genic_upstream_transcript_variant,intron_variant                                                  |
| rs931261306 | genic_downstream_transcript_variant,intron_variant                                                |
| rs931275405 | intron_variant                                                                                    |
| rs931276300 | intron_variant                                                                                    |
| rs931315477 | non_coding_transcript_variant,genic_upstream_transcript_variant,intron_variant                    |
| rs931334300 | genic_upstream_transcript_variant,intron_variant                                                  |
| rs931399662 | intron_variant                                                                                    |
| rs931424228 | genic_upstream_transcript_variant,intron_variant                                                  |
| rs931442823 | genic_upstream_transcript_variant,intron_variant                                                  |
| rs931445238 | intron_variant                                                                                    |
| rs931505079 | intron_variant                                                                                    |
| rs931525393 | genic_upstream_transcript_variant,intron_variant                                                  |
| rs931542321 | genic_downstream_transcript_variant,intron_variant                                                |
| rs931557788 | intron_variant                                                                                    |
| rs931565339 | intron_variant                                                                                    |
| rs931573351 | genic_downstream_transcript_variant,intron_variant                                                |
| rs931612764 | genic_downstream_transcript_variant,intron_variant                                                |
| rs931649534 | intron_variant                                                                                    |
| rs931681802 | intron_variant                                                                                    |
| rs931751070 | genic_downstream_transcript_variant,intron_variant                                                |
| rs931753609 | intron_variant                                                                                    |
| rs931814632 | genic_upstream_transcript_variant,intron_variant                                                  |
| rs931820727 | genic_upstream_transcript_variant,intron_variant                                                  |
| rs931839052 | genic_downstream_transcript_variant,intron_variant                                                |
| rs931841283 | genic_upstream_transcript_variant,intron_variant                                                  |
| rs931841521 | genic_upstream_transcript_variant,intron_variant                                                  |
| rs931843458 | intron_variant                                                                                    |

|             |                                                                                                                           |
|-------------|---------------------------------------------------------------------------------------------------------------------------|
| rs931893021 | genic_upstream_transcript_variant,2KB_upstream_variant,upstream_transcript_variant,intron_variant                         |
| rs931895559 | genic_downstream_transcript_variant,intron_variant                                                                        |
| rs931898196 | genic_upstream_transcript_variant,2KB_upstream_variant,upstream_transcript_variant,intron_variant                         |
| rs931961210 | genic_upstream_transcript_variant,intron_variant                                                                          |
| rs931971062 | genic_upstream_transcript_variant,intron_variant                                                                          |
| rs931981882 | genic_upstream_transcript_variant,intron_variant                                                                          |
| rs932004630 | intron_variant                                                                                                            |
| rs932081782 | genic_upstream_transcript_variant,intron_variant                                                                          |
| rs932126167 | genic_upstream_transcript_variant,intron_variant                                                                          |
| rs932145410 | intron_variant                                                                                                            |
| rs932168124 | 500B_downstream_variant,downstream_transcript_variant                                                                     |
| rs932192796 | intron_variant                                                                                                            |
| rs932214516 | genic_upstream_transcript_variant,intron_variant                                                                          |
| rs932226792 | intron_variant                                                                                                            |
| rs932232554 | genic_upstream_transcript_variant,intron_variant                                                                          |
| rs932241914 | intron_variant                                                                                                            |
| rs932249785 | intron_variant                                                                                                            |
| rs932266259 | genic_downstream_transcript_variant,intron_variant                                                                        |
| rs932291966 | genic_downstream_transcript_variant,intron_variant                                                                        |
| rs932300035 | genic_upstream_transcript_variant,intron_variant                                                                          |
| rs932309917 | genic_upstream_transcript_variant,intron_variant                                                                          |
| rs932425120 | genic_downstream_transcript_variant,intron_variant                                                                        |
| rs932434369 | genic_upstream_transcript_variant,intron_variant                                                                          |
| rs932467081 | genic_downstream_transcript_variant,intron_variant                                                                        |
| rs932492107 | non_coding_transcript_variant,intron_variant,coding_sequence_variant,synonymous_variant,genic_upstream_transcript_variant |
| rs932520666 | genic_downstream_transcript_variant,intron_variant                                                                        |
| rs932521391 | genic_downstream_transcript_variant,intron_variant                                                                        |
| rs932546762 | genic_upstream_transcript_variant,intron_variant                                                                          |
| rs932577827 | genic_upstream_transcript_variant,intron_variant                                                                          |
| rs932602774 | genic_upstream_transcript_variant,intron_variant                                                                          |
| rs932676491 | genic_upstream_transcript_variant,intron_variant                                                                          |
| rs932714970 | genic_downstream_transcript_variant,downstream_transcript_variant,intron_variant                                          |
| rs932746300 | genic_downstream_transcript_variant,intron_variant                                                                        |
| rs932792031 | genic_upstream_transcript_variant,intron_variant                                                                          |
| rs932846927 | genic_downstream_transcript_variant,intron_variant                                                                        |
| rs932847552 | intron_variant                                                                                                            |
| rs932898933 | intron_variant                                                                                                            |
| rs932959601 | genic_upstream_transcript_variant,intron_variant                                                                          |
| rs932996544 | genic_downstream_transcript_variant,intron_variant                                                                        |
| rs933007749 | genic_downstream_transcript_variant,intron_variant                                                                        |
| rs933016142 | genic_upstream_transcript_variant,intron_variant                                                                          |
| rs933027761 | intron_variant                                                                                                            |
| rs933062096 | genic_upstream_transcript_variant,intron_variant                                                                          |
| rs933141285 | genic_upstream_transcript_variant,intron_variant                                                                          |
| rs933160531 | intron_variant                                                                                                            |
| rs933191347 | 500B_downstream_variant,downstream_transcript_variant                                                                     |
| rs933247145 | genic_downstream_transcript_variant,intron_variant                                                                        |
| rs933270183 | genic_upstream_transcript_variant,intron_variant                                                                          |
| rs933292372 | intron_variant                                                                                                            |
| rs93332894  | genic_upstream_transcript_variant,intron_variant                                                                          |
| rs933343464 | intron_variant                                                                                                            |
| rs933368358 | intron_variant                                                                                                            |
| rs933388905 | genic_downstream_transcript_variant,intron_variant                                                                        |
| rs933421721 | genic_upstream_transcript_variant,intron_variant                                                                          |
| rs933423905 | intron_variant                                                                                                            |
| rs933438402 | genic_downstream_transcript_variant,intron_variant                                                                        |
| rs933443843 | intron_variant                                                                                                            |
| rs933465618 | genic_upstream_transcript_variant,intron_variant                                                                          |
| rs933467447 | genic_upstream_transcript_variant,intron_variant                                                                          |
| rs933492530 | genic_upstream_transcript_variant,2KB_upstream_variant,upstream_transcript_variant,intron_variant                         |
| rs933513895 | genic_upstream_transcript_variant,intron_variant                                                                          |
| rs933514257 | intron_variant                                                                                                            |
| rs933517686 | genic_upstream_transcript_variant,intron_variant                                                                          |
| rs933539491 | genic_upstream_transcript_variant,upstream_transcript_variant,intron_variant                                              |
| rs933539789 | genic_upstream_transcript_variant,intron_variant                                                                          |
| rs933568182 | intron_variant                                                                                                            |
| rs933576324 | genic_upstream_transcript_variant,intron_variant                                                                          |
| rs933745986 | genic_upstream_transcript_variant,intron_variant                                                                          |
| rs933751514 | genic_downstream_transcript_variant,intron_variant                                                                        |
| rs933755340 | intron_variant                                                                                                            |
| rs93377285  | intron_variant                                                                                                            |
| rs933781617 | genic_upstream_transcript_variant,intron_variant                                                                          |
| rs933797198 | genic_upstream_transcript_variant,2KB_upstream_variant,upstream_transcript_variant,intron_variant                         |
| rs933816809 | genic_upstream_transcript_variant,intron_variant                                                                          |

|             |                                                                                                   |
|-------------|---------------------------------------------------------------------------------------------------|
| rs933822890 | genic_upstream_transcript_variant,intron_variant                                                  |
| rs933824215 | genic_upstream_transcript_variant,upstream_transcript_variant,intron_variant                      |
| rs933828539 | genic_upstream_transcript_variant,2KB_upstream_variant,upstream_transcript_variant,intron_variant |
| rs933852473 | intron_variant                                                                                    |
| rs933854651 | intron_variant                                                                                    |
| rs933909284 | genic_upstream_transcript_variant,intron_variant                                                  |
| rs933965608 | genic_upstream_transcript_variant,intron_variant                                                  |
| rs933993017 | genic_downstream_transcript_variant,intron_variant                                                |
| rs934003531 | intron_variant                                                                                    |
| rs934051850 | intron_variant                                                                                    |
| rs934059211 | genic_upstream_transcript_variant,intron_variant                                                  |
| rs934061888 | genic_upstream_transcript_variant,intron_variant                                                  |
| rs934069079 | upstream_transcript_variant,2KB_upstream_variant,genic_upstream_transcript_variant,intron_variant |
| rs934103428 | genic_downstream_transcript_variant,intron_variant                                                |
| rs934104516 | intron_variant                                                                                    |
| rs934113913 | genic_upstream_transcript_variant,intron_variant                                                  |
| rs934125452 | genic_downstream_transcript_variant,intron_variant                                                |
| rs934223870 | genic_downstream_transcript_variant,intron_variant                                                |
| rs934243821 | intron_variant                                                                                    |
| rs934244345 | genic_upstream_transcript_variant,intron_variant                                                  |
| rs934254138 | genic_upstream_transcript_variant,intron_variant                                                  |
| rs934255184 | genic_downstream_transcript_variant,intron_variant                                                |
| rs934263232 | genic_upstream_transcript_variant,intron_variant                                                  |
| rs934272226 | genic_downstream_transcript_variant,intron_variant                                                |
| rs934304491 | genic_upstream_transcript_variant,upstream_transcript_variant,intron_variant                      |
| rs934337156 | genic_upstream_transcript_variant,intron_variant                                                  |
| rs934350535 | genic_upstream_transcript_variant,upstream_transcript_variant,intron_variant                      |
| rs934361821 | intron_variant                                                                                    |
| rs934373350 | genic_downstream_transcript_variant,intron_variant                                                |
| rs934393044 | intron_variant                                                                                    |
| rs934461758 | intron_variant                                                                                    |
| rs934469506 | genic_upstream_transcript_variant,intron_variant                                                  |
| rs934486624 | intron_variant                                                                                    |
| rs934490293 | genic_downstream_transcript_variant,intron_variant                                                |
| rs934518588 | genic_downstream_transcript_variant,intron_variant                                                |
| rs934538816 | intron_variant                                                                                    |
| rs934599734 | genic_upstream_transcript_variant,intron_variant                                                  |
| rs934657966 | genic_upstream_transcript_variant,intron_variant                                                  |
| rs934693162 | genic_downstream_transcript_variant,downstream_transcript_variant,intron_variant                  |
| rs934731633 | genic_upstream_transcript_variant,intron_variant                                                  |
| rs934735885 | intron_variant                                                                                    |
| rs934750443 | genic_downstream_transcript_variant,downstream_transcript_variant,intron_variant                  |
| rs934767210 | intron_variant                                                                                    |
| rs934771568 | genic_downstream_transcript_variant,intron_variant                                                |
| rs934846443 | intron_variant                                                                                    |
| rs934850476 | intron_variant                                                                                    |
| rs934856191 | 5_prime_UTR_variant,upstream_transcript_variant,genic_upstream_transcript_variant,intron_variant  |
| rs934871407 | genic_upstream_transcript_variant,intron_variant                                                  |
| rs934993837 | genic_upstream_transcript_variant,intron_variant                                                  |
| rs935031783 | intron_variant                                                                                    |
| rs935038749 | genic_upstream_transcript_variant,intron_variant                                                  |
| rs935047265 | intron_variant                                                                                    |
| rs935048361 | genic_upstream_transcript_variant,intron_variant                                                  |
| rs935065561 | genic_upstream_transcript_variant,intron_variant                                                  |
| rs935075329 | genic_upstream_transcript_variant,intron_variant                                                  |
| rs935084359 | intron_variant                                                                                    |
| rs935152176 | intron_variant                                                                                    |
| rs935197511 | intron_variant                                                                                    |
| rs935202940 | intron_variant                                                                                    |
| rs935203345 | genic_upstream_transcript_variant,intron_variant                                                  |
| rs935240523 | genic_upstream_transcript_variant,intron_variant                                                  |
| rs935264626 | genic_upstream_transcript_variant,intron_variant                                                  |
| rs935288630 | genic_downstream_transcript_variant,intron_variant                                                |
| rs935305319 | intron_variant                                                                                    |
| rs935315713 | genic_upstream_transcript_variant,intron_variant                                                  |
| rs935347885 | intron_variant                                                                                    |
| rs935373937 | genic_upstream_transcript_variant,intron_variant                                                  |
| rs935381717 | genic_downstream_transcript_variant,intron_variant                                                |
| rs935424233 | genic_downstream_transcript_variant,intron_variant                                                |
| rs935436857 | intron_variant                                                                                    |
| rs935451509 | genic_upstream_transcript_variant,intron_variant                                                  |
| rs935452895 | genic_upstream_transcript_variant,intron_variant                                                  |
| rs935458171 | intron_variant                                                                                    |
| rs935526911 | genic_upstream_transcript_variant,intron_variant                                                  |

|             |                                                                                                   |
|-------------|---------------------------------------------------------------------------------------------------|
| rs935560154 | genic_upstream_transcript_variant,intron_variant                                                  |
| rs935573796 | genic_upstream_transcript_variant,intron_variant                                                  |
| rs935574055 | intron_variant                                                                                    |
| rs935574732 | intron_variant                                                                                    |
| rs935608683 | genic_downstream_transcript_variant,intron_variant                                                |
| rs935626351 | intron_variant                                                                                    |
| rs935640771 | genic_upstream_transcript_variant,2KB_upstream_variant,upstream_transcript_variant,intron_variant |
| rs935660112 | genic_upstream_transcript_variant,intron_variant                                                  |
| rs935715389 | genic_downstream_transcript_variant,intron_variant                                                |
| rs935745156 | genic_downstream_transcript_variant,intron_variant                                                |
| rs935749669 | genic_upstream_transcript_variant,2KB_upstream_variant,upstream_transcript_variant,intron_variant |
| rs935784541 | intron_variant                                                                                    |
| rs935818777 | genic_upstream_transcript_variant,intron_variant                                                  |
| rs935854719 | intron_variant                                                                                    |
| rs935862137 | intron_variant                                                                                    |
| rs935869523 | genic_upstream_transcript_variant,2KB_upstream_variant,upstream_transcript_variant,intron_variant |
| rs935873033 | intron_variant                                                                                    |
| rs935922573 | intron_variant                                                                                    |
| rs935958775 | intron_variant                                                                                    |
| rs935964036 | genic_downstream_transcript_variant,intron_variant                                                |
| rs935985332 | genic_upstream_transcript_variant,intron_variant                                                  |
| rs935991339 | genic_upstream_transcript_variant,intron_variant                                                  |
| rs936007944 | intron_variant                                                                                    |
| rs936013625 | intron_variant                                                                                    |
| rs936052248 | genic_upstream_transcript_variant,intron_variant                                                  |
| rs936130561 | genic_downstream_transcript_variant,intron_variant                                                |
| rs936170881 | genic_upstream_transcript_variant,intron_variant                                                  |
| rs936203188 | genic_upstream_transcript_variant,intron_variant                                                  |
| rs936204635 | genic_downstream_transcript_variant,intron_variant                                                |
| rs936241207 | genic_downstream_transcript_variant,intron_variant                                                |
| rs936263002 | genic_downstream_transcript_variant,intron_variant                                                |
| rs936281679 | genic_downstream_transcript_variant,intron_variant                                                |
| rs936300686 | genic_downstream_transcript_variant,intron_variant                                                |
| rs936312565 | intron_variant                                                                                    |
| rs936327777 | upstream_transcript_variant,2KB_upstream_variant,genic_upstream_transcript_variant,intron_variant |
| rs936331420 | genic_upstream_transcript_variant,intron_variant                                                  |
| rs936339140 | intron_variant                                                                                    |
| rs936358635 | intron_variant                                                                                    |
| rs936376615 | genic_upstream_transcript_variant,intron_variant                                                  |
| rs936401139 | genic_upstream_transcript_variant,intron_variant                                                  |
| rs936431047 | genic_upstream_transcript_variant,intron_variant                                                  |
| rs936435144 | genic_downstream_transcript_variant,intron_variant                                                |
| rs936454205 | intron_variant                                                                                    |
| rs936461199 | intron_variant                                                                                    |
| rs936463653 | upstream_transcript_variant,2KB_upstream_variant,genic_upstream_transcript_variant,intron_variant |
| rs936478068 | genic_downstream_transcript_variant,intron_variant                                                |
| rs936510159 | genic_upstream_transcript_variant,intron_variant                                                  |
| rs936513194 | intron_variant                                                                                    |
| rs936570295 | genic_upstream_transcript_variant,intron_variant                                                  |
| rs936598431 | 5_prime_UTR_variant,intron_variant                                                                |
| rs936652013 | genic_upstream_transcript_variant,intron_variant                                                  |
| rs936666863 | intron_variant                                                                                    |
| rs936670886 | genic_upstream_transcript_variant,intron_variant                                                  |
| rs936723909 | 3_prime_UTR_variant,genic_downstream_transcript_variant,non_coding_transcript_variant             |
| rs936739142 | intron_variant                                                                                    |
| rs936746255 | genic_upstream_transcript_variant,intron_variant                                                  |
| rs936780067 | intron_variant                                                                                    |
| rs936782478 | 3_prime_UTR_variant,genic_downstream_transcript_variant,non_coding_transcript_variant             |
| rs936803610 | intron_variant                                                                                    |
| rs936822958 | genic_downstream_transcript_variant,intron_variant                                                |
| rs936823327 | genic_upstream_transcript_variant,intron_variant                                                  |
| rs936833179 | intron_variant                                                                                    |
| rs936850416 | genic_upstream_transcript_variant,intron_variant                                                  |
| rs936857150 | intron_variant                                                                                    |
| rs936859381 | 3_prime_UTR_variant,genic_downstream_transcript_variant,non_coding_transcript_variant             |
| rs936925051 | genic_upstream_transcript_variant,intron_variant                                                  |
| rs936948928 | intron_variant                                                                                    |
| rs936968640 | intron_variant                                                                                    |
| rs936993871 | genic_upstream_transcript_variant,2KB_upstream_variant,upstream_transcript_variant,intron_variant |
| rs936999033 | genic_downstream_transcript_variant,intron_variant                                                |
| rs937050407 | intron_variant                                                                                    |
| rs937055013 | genic_upstream_transcript_variant,intron_variant                                                  |
| rs937057080 | genic_upstream_transcript_variant,intron_variant                                                  |
| rs937065345 | genic_upstream_transcript_variant,intron_variant                                                  |

|             |                                                                                                   |
|-------------|---------------------------------------------------------------------------------------------------|
| rs937101455 | intron_variant                                                                                    |
| rs937144514 | intron_variant                                                                                    |
| rs937176316 | genic_upstream_transcript_variant,intron_variant                                                  |
| rs937223581 | 3_prime_UTR_variant,genic_downstream_transcript_variant,non_coding_transcript_variant             |
| rs937291155 | intron_variant                                                                                    |
| rs937296625 | genic_upstream_transcript_variant,intron_variant                                                  |
| rs937297140 | genic_upstream_transcript_variant,intron_variant                                                  |
| rs937299753 | genic_downstream_transcript_variant,intron_variant                                                |
| rs937323671 | genic_upstream_transcript_variant,intron_variant                                                  |
| rs937383806 | genic_upstream_transcript_variant,intron_variant                                                  |
| rs937401600 | genic_upstream_transcript_variant,intron_variant                                                  |
| rs937435487 | genic_downstream_transcript_variant,intron_variant                                                |
| rs937444740 | genic_upstream_transcript_variant,intron_variant                                                  |
| rs937452278 | intron_variant                                                                                    |
| rs937470438 | genic_downstream_transcript_variant,intron_variant                                                |
| rs937502443 | intron_variant                                                                                    |
| rs937515485 | intron_variant                                                                                    |
| rs937532828 | genic_upstream_transcript_variant,intron_variant                                                  |
| rs937547672 | genic_upstream_transcript_variant,intron_variant                                                  |
| rs937580981 | genic_upstream_transcript_variant,intron_variant                                                  |
| rs937623524 | genic_downstream_transcript_variant,intron_variant                                                |
| rs937624021 | genic_downstream_transcript_variant,intron_variant                                                |
| rs937661532 | intron_variant                                                                                    |
| rs937721111 | intron_variant                                                                                    |
| rs937750774 | intron_variant                                                                                    |
| rs937759983 | intron_variant                                                                                    |
| rs937777073 | genic_upstream_transcript_variant,intron_variant                                                  |
| rs937828223 | intron_variant                                                                                    |
| rs937849987 | genic_upstream_transcript_variant,intron_variant                                                  |
| rs937859073 | intron_variant                                                                                    |
| rs937889207 | genic_upstream_transcript_variant,intron_variant                                                  |
| rs937893779 | genic_downstream_transcript_variant,intron_variant                                                |
| rs937910225 | genic_upstream_transcript_variant,intron_variant                                                  |
| rs937922752 | intron_variant                                                                                    |
| rs937943440 | genic_downstream_transcript_variant,intron_variant                                                |
| rs937959400 | genic_downstream_transcript_variant,intron_variant                                                |
| rs937991681 | genic_upstream_transcript_variant,intron_variant                                                  |
| rs937998109 | intron_variant                                                                                    |
| rs938017988 | intron_variant                                                                                    |
| rs938046205 | 3_prime_UTR_variant,genic_downstream_transcript_variant,non_coding_transcript_variant             |
| rs938061303 | 3_prime_UTR_variant,genic_downstream_transcript_variant,non_coding_transcript_variant             |
| rs938110913 | genic_upstream_transcript_variant,intron_variant                                                  |
| rs938134988 | intron_variant                                                                                    |
| rs938141546 | intron_variant                                                                                    |
| rs938189181 | genic_downstream_transcript_variant,intron_variant                                                |
| rs938193388 | intron_variant                                                                                    |
| rs938258857 | intron_variant                                                                                    |
| rs938280490 | genic_upstream_transcript_variant,intron_variant                                                  |
| rs938299267 | intron_variant                                                                                    |
| rs938303503 | genic_downstream_transcript_variant,intron_variant                                                |
| rs938303829 | genic_downstream_transcript_variant,intron_variant                                                |
| rs938304724 | upstream_transcript_variant,2KB_upstream_variant,genic_upstream_transcript_variant,intron_variant |
| rs938339237 | intron_variant                                                                                    |
| rs938348784 | genic_downstream_transcript_variant,intron_variant                                                |
| rs938403137 | genic_upstream_transcript_variant,intron_variant                                                  |
| rs938436871 | intron_variant                                                                                    |
| rs938441174 | genic_downstream_transcript_variant,intron_variant                                                |
| rs938469147 | genic_upstream_transcript_variant,intron_variant                                                  |
| rs938472264 | genic_downstream_transcript_variant,intron_variant                                                |
| rs938497101 | genic_downstream_transcript_variant,intron_variant                                                |
| rs938520332 | intron_variant                                                                                    |
| rs938525231 | genic_upstream_transcript_variant,intron_variant                                                  |
| rs938542753 | genic_upstream_transcript_variant,intron_variant                                                  |
| rs938569312 | genic_upstream_transcript_variant,2KB_upstream_variant,upstream_transcript_variant,intron_variant |
| rs938572106 | genic_upstream_transcript_variant,intron_variant                                                  |
| rs938573873 | genic_upstream_transcript_variant,intron_variant                                                  |
| rs938595021 | intron_variant                                                                                    |
| rs938598021 | intron_variant                                                                                    |
| rs938651757 | intron_variant                                                                                    |
| rs938678247 | intron_variant                                                                                    |
| rs938723512 | genic_downstream_transcript_variant,intron_variant                                                |
| rs938730378 | genic_downstream_transcript_variant,intron_variant                                                |
| rs938754405 | genic_downstream_transcript_variant,intron_variant                                                |
| rs938815885 | intron_variant                                                                                    |

|             |                                                                                                   |
|-------------|---------------------------------------------------------------------------------------------------|
| rs938839759 | intron_variant                                                                                    |
| rs938862857 | genic_upstream_transcript_variant,intron_variant                                                  |
| rs938867164 | genic_downstream_transcript_variant,intron_variant                                                |
| rs938868857 | genic_downstream_transcript_variant,intron_variant                                                |
| rs938917966 | intron_variant                                                                                    |
| rs938934187 | genic_upstream_transcript_variant,intron_variant                                                  |
| rs938958370 | genic_upstream_transcript_variant,intron_variant                                                  |
| rs938973651 | intron_variant                                                                                    |
| rs938976885 | intron_variant                                                                                    |
| rs939004246 | intron_variant                                                                                    |
| rs939043131 | genic_upstream_transcript_variant,intron_variant                                                  |
| rs939049796 | intron_variant                                                                                    |
| rs939059793 | genic_downstream_transcript_variant,intron_variant                                                |
| rs939091174 | genic_downstream_transcript_variant,intron_variant                                                |
| rs939115438 | genic_upstream_transcript_variant,intron_variant                                                  |
| rs939122938 | intron_variant                                                                                    |
| rs939140460 | upstream_transcript_variant,2KB_upstream_variant,genic_upstream_transcript_variant,intron_variant |
| rs939155786 | intron_variant                                                                                    |
| rs939172061 | genic_upstream_transcript_variant,intron_variant                                                  |
| rs939204138 | genic_downstream_transcript_variant,intron_variant                                                |
| rs939216567 | intron_variant                                                                                    |
| rs939283763 | genic_upstream_transcript_variant,intron_variant                                                  |
| rs939288109 | genic_upstream_transcript_variant,intron_variant                                                  |
| rs939318211 | genic_downstream_transcript_variant,intron_variant                                                |
| rs939324967 | genic_upstream_transcript_variant,intron_variant                                                  |
| rs939336247 | genic_upstream_transcript_variant,intron_variant                                                  |
| rs939350717 | genic_upstream_transcript_variant,intron_variant                                                  |
| rs939356027 | genic_upstream_transcript_variant,intron_variant                                                  |
| rs939382956 | genic_upstream_transcript_variant,intron_variant                                                  |
| rs939392539 | intron_variant                                                                                    |
| rs939392609 | intron_variant                                                                                    |
| rs939414657 | genic_upstream_transcript_variant,intron_variant                                                  |
| rs939425857 | intron_variant                                                                                    |
| rs939444909 | intron_variant                                                                                    |
| rs939517824 | genic_upstream_transcript_variant,intron_variant                                                  |
| rs939525476 | genic_upstream_transcript_variant,intron_variant                                                  |
| rs939526510 | genic_upstream_transcript_variant,intron_variant                                                  |
| rs939541474 | intron_variant                                                                                    |
| rs939557226 | intron_variant                                                                                    |
| rs939578264 | genic_upstream_transcript_variant,intron_variant                                                  |
| rs939621662 | genic_upstream_transcript_variant,intron_variant                                                  |
| rs939641148 | genic_downstream_transcript_variant,intron_variant                                                |
| rs939678861 | genic_downstream_transcript_variant,intron_variant                                                |
| rs939680786 | intron_variant                                                                                    |
| rs939709876 | genic_downstream_transcript_variant,intron_variant                                                |
| rs939788470 | intron_variant                                                                                    |
| rs939799168 | genic_downstream_transcript_variant,intron_variant                                                |
| rs939802797 | genic_upstream_transcript_variant,intron_variant                                                  |
| rs939827002 | genic_upstream_transcript_variant,2KB_upstream_variant,upstream_transcript_variant,intron_variant |
| rs939868348 | genic_downstream_transcript_variant,intron_variant                                                |
| rs939887784 | genic_upstream_transcript_variant,intron_variant                                                  |
| rs939937790 | genic_upstream_transcript_variant,intron_variant                                                  |
| rs939938310 | intron_variant                                                                                    |
| rs939940706 | genic_upstream_transcript_variant,2KB_upstream_variant,upstream_transcript_variant,intron_variant |
| rs939970405 | intron_variant                                                                                    |
| rs940013276 | intron_variant                                                                                    |
| rs940017518 | genic_downstream_transcript_variant,intron_variant                                                |
| rs940028464 | intron_variant                                                                                    |
| rs940053396 | genic_upstream_transcript_variant,intron_variant                                                  |
| rs940060335 | upstream_transcript_variant,2KB_upstream_variant,genic_upstream_transcript_variant,intron_variant |
| rs940081872 | intron_variant                                                                                    |
| rs940106409 | intron_variant                                                                                    |
| rs940109529 | intron_variant                                                                                    |
| rs940134190 | intron_variant                                                                                    |
| rs940156517 | genic_upstream_transcript_variant,intron_variant                                                  |
| rs940156877 | upstream_transcript_variant,2KB_upstream_variant,genic_upstream_transcript_variant,intron_variant |
| rs940188755 | upstream_transcript_variant,2KB_upstream_variant,genic_upstream_transcript_variant,intron_variant |
| rs940232843 | genic_upstream_transcript_variant,intron_variant                                                  |
| rs940260537 | intron_variant                                                                                    |
| rs940276053 | genic_downstream_transcript_variant,intron_variant                                                |
| rs940307815 | genic_downstream_transcript_variant,intron_variant                                                |
| rs940313868 | intron_variant                                                                                    |
| rs940330993 | genic_downstream_transcript_variant,intron_variant                                                |
| rs940361468 | genic_upstream_transcript_variant,intron_variant                                                  |

|             |                                                                                                    |
|-------------|----------------------------------------------------------------------------------------------------|
| rs940380581 | genic_upstream_transcript_variant,intron_variant                                                   |
| rs940384331 | intron_variant                                                                                     |
| rs940411801 | genic_upstream_transcript_variant,intron_variant                                                   |
| rs940419521 | intron_variant                                                                                     |
| rs940461813 | intron_variant                                                                                     |
| rs940485001 | intron_variant                                                                                     |
| rs940489444 | upstream_transcript_variant,2KB_upstream_variant,genic_upstream_transcript_variant,intron_variant  |
| rs940508284 | genic_downstream_transcript_variant,intron_variant                                                 |
| rs940601132 | genic_downstream_transcript_variant,intron_variant                                                 |
| rs940609502 | intron_variant                                                                                     |
| rs940618370 | genic_downstream_transcript_variant,intron_variant                                                 |
| rs940689317 | intron_variant                                                                                     |
| rs940699078 | intron_variant                                                                                     |
| rs940719470 | genic_upstream_transcript_variant,intron_variant                                                   |
| rs940725075 | genic_upstream_transcript_variant,intron_variant                                                   |
| rs940740275 | intron_variant                                                                                     |
| rs940765294 | genic_upstream_transcript_variant,intron_variant                                                   |
| rs940799198 | genic_upstream_transcript_variant,intron_variant                                                   |
| rs940851158 | intron_variant                                                                                     |
| rs940861258 | genic_upstream_transcript_variant,intron_variant                                                   |
| rs940885371 | genic_upstream_transcript_variant,intron_variant                                                   |
| rs940886110 | 3_prime_UTR_variant,genic_downstream_transcript_variant,non_coding_transcript_variant              |
| rs940897418 | genic_upstream_transcript_variant,intron_variant                                                   |
| rs940922335 | genic_upstream_transcript_variant,2KB_upstream_variant,upstream_transcript_variant,intron_variant  |
| rs940930842 | genic_upstream_transcript_variant,intron_variant                                                   |
| rs940974480 | genic_upstream_transcript_variant,intron_variant                                                   |
| rs940981549 | intron_variant                                                                                     |
| rs940995413 | intron_variant                                                                                     |
| rs940997893 | genic_upstream_transcript_variant,intron_variant                                                   |
| rs941008420 | intron_variant                                                                                     |
| rs941012514 | genic_downstream_transcript_variant,intron_variant                                                 |
| rs941033299 | intron_variant                                                                                     |
| rs941038623 | genic_upstream_transcript_variant,intron_variant                                                   |
| rs941039631 | genic_upstream_transcript_variant,intron_variant                                                   |
| rs941074853 | genic_upstream_transcript_variant,intron_variant                                                   |
| rs941129606 | genic_upstream_transcript_variant,intron_variant                                                   |
| rs941134920 | genic_downstream_transcript_variant,intron_variant                                                 |
| rs941161667 | genic_downstream_transcript_variant,intron_variant                                                 |
| rs941161867 | intron_variant                                                                                     |
| rs941175328 | genic_downstream_transcript_variant,intron_variant                                                 |
| rs941228338 | intron_variant                                                                                     |
| rs941260929 | 5_prime_UTR_variant,intron_variant,genic_upstream_transcript_variant,non_coding_transcript_variant |
| rs941263849 | intron_variant                                                                                     |
| rs941267546 | genic_downstream_transcript_variant,intron_variant                                                 |
| rs941313459 | genic_upstream_transcript_variant,intron_variant                                                   |
| rs941321234 | intron_variant                                                                                     |
| rs941333355 | genic_upstream_transcript_variant,intron_variant                                                   |
| rs941339780 | genic_upstream_transcript_variant,intron_variant                                                   |
| rs941382732 | genic_downstream_transcript_variant,intron_variant                                                 |
| rs941386557 | genic_downstream_transcript_variant,intron_variant                                                 |
| rs941425004 | genic_upstream_transcript_variant,intron_variant                                                   |
| rs941427380 | intron_variant                                                                                     |
| rs941458029 | intron_variant                                                                                     |
| rs941480972 | genic_downstream_transcript_variant,intron_variant                                                 |
| rs941524871 | genic_upstream_transcript_variant,intron_variant                                                   |
| rs941557918 | genic_upstream_transcript_variant,intron_variant                                                   |
| rs941568588 | intron_variant                                                                                     |
| rs941591353 | intron_variant                                                                                     |
| rs941600853 | intron_variant                                                                                     |
| rs941691862 | intron_variant                                                                                     |
| rs941694127 | genic_upstream_transcript_variant,intron_variant                                                   |
| rs941714005 | intron_variant                                                                                     |
| rs941742595 | intron_variant                                                                                     |
| rs941757308 | 3_prime_UTR_variant,genic_downstream_transcript_variant,non_coding_transcript_variant              |
| rs941776285 | intron_variant                                                                                     |
| rs941826424 | genic_downstream_transcript_variant,intron_variant                                                 |
| rs941835625 | 3_prime_UTR_variant,genic_downstream_transcript_variant,non_coding_transcript_variant              |
| rs941865663 | genic_upstream_transcript_variant,intron_variant                                                   |
| rs941887833 | 500B_downstream_variant,downstream_transcript_variant                                              |
| rs941938398 | intron_variant                                                                                     |
| rs941972508 | intron_variant                                                                                     |
| rs941980220 | genic_upstream_transcript_variant,intron_variant                                                   |
| rs941998316 | intron_variant                                                                                     |
| rs942002767 | genic_downstream_transcript_variant,intron_variant                                                 |

|             |                                                                                                   |
|-------------|---------------------------------------------------------------------------------------------------|
| rs942033780 | genic_downstream_transcript_variant,intron_variant                                                |
| rs942046258 | genic_upstream_transcript_variant,intron_variant                                                  |
| rs942055633 | genic_upstream_transcript_variant,intron_variant                                                  |
| rs942077373 | genic_downstream_transcript_variant,intron_variant                                                |
| rs942115831 | genic_upstream_transcript_variant,intron_variant                                                  |
| rs942117211 | intron_variant                                                                                    |
| rs942118136 | intron_variant                                                                                    |
| rs942182192 | intron_variant                                                                                    |
| rs942188747 | genic_upstream_transcript_variant,2KB_upstream_variant,upstream_transcript_variant,intron_variant |
| rs942266229 | intron_variant                                                                                    |
| rs942277007 | intron_variant                                                                                    |
| rs942278716 | genic_downstream_transcript_variant,intron_variant                                                |
| rs942317838 | genic_downstream_transcript_variant,intron_variant                                                |
| rs942322578 | synonymous_variant,coding_sequence_variant,non_coding_transcript_variant                          |
| rs942323644 | intron_variant                                                                                    |
| rs942392921 | genic_upstream_transcript_variant,intron_variant                                                  |
| rs942424476 | intron_variant                                                                                    |
| rs942424628 | genic_upstream_transcript_variant,intron_variant                                                  |
| rs942453578 | genic_downstream_transcript_variant,intron_variant                                                |
| rs942465958 | genic_upstream_transcript_variant,intron_variant                                                  |
| rs942489223 | intron_variant                                                                                    |
| rs942522674 | genic_downstream_transcript_variant,intron_variant                                                |
| rs942580751 | intron_variant                                                                                    |
| rs942583041 | genic_upstream_transcript_variant,intron_variant                                                  |
| rs942594446 | genic_upstream_transcript_variant,intron_variant                                                  |
| rs942595743 | genic_upstream_transcript_variant,intron_variant                                                  |
| rs942617207 | genic_downstream_transcript_variant,intron_variant                                                |
| rs942639009 | genic_downstream_transcript_variant,intron_variant                                                |
| rs942665095 | intron_variant                                                                                    |
| rs942700438 | intron_variant                                                                                    |
| rs942704772 | intron_variant                                                                                    |
| rs942737540 | genic_downstream_transcript_variant,intron_variant                                                |
| rs942764424 | intron_variant                                                                                    |
| rs942830301 | genic_upstream_transcript_variant,intron_variant                                                  |
| rs942848558 | genic_downstream_transcript_variant,intron_variant                                                |
| rs942856825 | intron_variant                                                                                    |
| rs942978803 | genic_upstream_transcript_variant,intron_variant                                                  |
| rs942981328 | intron_variant                                                                                    |
| rs943030870 | intron_variant                                                                                    |
| rs943044931 | intron_variant                                                                                    |
| rs943094982 | intron_variant                                                                                    |
| rs943116591 | genic_downstream_transcript_variant,intron_variant                                                |
| rs943124976 | genic_upstream_transcript_variant,intron_variant                                                  |
| rs943157486 | genic_upstream_transcript_variant,intron_variant                                                  |
| rs943188103 | genic_upstream_transcript_variant,intron_variant                                                  |
| rs943197266 | intron_variant                                                                                    |
| rs943205876 | genic_downstream_transcript_variant,intron_variant                                                |
| rs943260373 | genic_upstream_transcript_variant,intron_variant                                                  |
| rs943284159 | intron_variant                                                                                    |
| rs943315087 | intron_variant                                                                                    |
| rs943318664 | genic_upstream_transcript_variant,intron_variant                                                  |
| rs943339570 | genic_downstream_transcript_variant,intron_variant                                                |
| rs943364911 | intron_variant                                                                                    |
| rs943369262 | genic_downstream_transcript_variant,intron_variant                                                |
| rs943394737 | intron_variant                                                                                    |
| rs943424172 | intron_variant                                                                                    |
| rs943426543 | intron_variant                                                                                    |
| rs943454637 | intron_variant                                                                                    |
| rs943476864 | intron_variant                                                                                    |
| rs943544812 | genic_downstream_transcript_variant,intron_variant                                                |
| rs943574535 | intron_variant                                                                                    |
| rs943578232 | intron_variant                                                                                    |
| rs943587627 | genic_upstream_transcript_variant,intron_variant                                                  |
| rs943639027 | genic_downstream_transcript_variant,intron_variant                                                |
| rs943655920 | intron_variant                                                                                    |
| rs943668353 | genic_upstream_transcript_variant,intron_variant                                                  |
| rs943701294 | intron_variant                                                                                    |
| rs943726770 | intron_variant                                                                                    |
| rs943801476 | downstream_transcript_variant,genic_downstream_transcript_variant,intron_variant                  |
| rs943854424 | genic_upstream_transcript_variant,intron_variant                                                  |
| rs943856313 | genic_upstream_transcript_variant,intron_variant                                                  |
| rs943882027 | intron_variant                                                                                    |
| rs943898732 | genic_downstream_transcript_variant,intron_variant                                                |
| rs943965270 | genic_downstream_transcript_variant,intron_variant                                                |

|             |                                                                                                    |
|-------------|----------------------------------------------------------------------------------------------------|
| rs943972301 | genic_upstream_transcript_variant,intron_variant                                                   |
| rs944041229 | genic_upstream_transcript_variant,intron_variant                                                   |
| rs944044768 | intron_variant                                                                                     |
| rs944049570 | genic_upstream_transcript_variant,intron_variant                                                   |
| rs944068241 | intron_variant                                                                                     |
| rs944132411 | intron_variant                                                                                     |
| rs944169248 | genic_upstream_transcript_variant,intron_variant                                                   |
| rs944188070 | downstream_transcript_variant,genic_downstream_transcript_variant,intron_variant                   |
| rs944229161 | intron_variant                                                                                     |
| rs944236271 | genic_upstream_transcript_variant,intron_variant                                                   |
| rs944239713 | genic_upstream_transcript_variant,upstream_transcript_variant,intron_variant                       |
| rs944243856 | genic_upstream_transcript_variant,intron_variant                                                   |
| rs944335837 | genic_downstream_transcript_variant,intron_variant                                                 |
| rs944404510 | genic_upstream_transcript_variant,intron_variant                                                   |
| rs944423793 | intron_variant                                                                                     |
| rs944452999 | genic_upstream_transcript_variant,intron_variant                                                   |
| rs944503531 | genic_downstream_transcript_variant,intron_variant                                                 |
| rs944507261 | genic_upstream_transcript_variant,intron_variant                                                   |
| rs944564418 | genic_upstream_transcript_variant,intron_variant                                                   |
| rs944581997 | genic_upstream_transcript_variant,intron_variant                                                   |
| rs944589788 | genic_upstream_transcript_variant,intron_variant                                                   |
| rs944592557 | intron_variant                                                                                     |
| rs944595130 | intron_variant                                                                                     |
| rs944694811 | genic_upstream_transcript_variant,intron_variant                                                   |
| rs944703586 | genic_downstream_transcript_variant,intron_variant                                                 |
| rs944708862 | genic_downstream_transcript_variant,intron_variant                                                 |
| rs944742832 | genic_upstream_transcript_variant,intron_variant                                                   |
| rs944746591 | genic_upstream_transcript_variant,intron_variant                                                   |
| rs944797974 | intron_variant                                                                                     |
| rs944810191 | intron_variant                                                                                     |
| rs944813290 | intron_variant                                                                                     |
| rs944836166 | genic_upstream_transcript_variant,intron_variant                                                   |
| rs944849603 | intron_variant                                                                                     |
| rs944895498 | 3_prime_UTR_variant,genic_downstream_transcript_variant,non_coding_transcript_variant              |
| rs944899941 | genic_upstream_transcript_variant,intron_variant                                                   |
| rs944955422 | intron_variant                                                                                     |
| rs944957093 | intron_variant                                                                                     |
| rs944972544 | genic_downstream_transcript_variant,intron_variant                                                 |
| rs945035708 | intron_variant                                                                                     |
| rs945045960 | intron_variant                                                                                     |
| rs945058733 | genic_upstream_transcript_variant,intron_variant                                                   |
| rs945070903 | intron_variant                                                                                     |
| rs945125037 | genic_upstream_transcript_variant,intron_variant                                                   |
| rs945178267 | intron_variant                                                                                     |
| rs945192841 | genic_downstream_transcript_variant,intron_variant                                                 |
| rs945193793 | genic_upstream_transcript_variant,intron_variant                                                   |
| rs945202324 | genic_downstream_transcript_variant,intron_variant                                                 |
| rs945211485 | genic_upstream_transcript_variant,intron_variant                                                   |
| rs945220313 | genic_upstream_transcript_variant,intron_variant                                                   |
| rs945232322 | intron_variant                                                                                     |
| rs945240770 | genic_downstream_transcript_variant,intron_variant                                                 |
| rs945272269 | intron_variant                                                                                     |
| rs945297815 | genic_upstream_transcript_variant,intron_variant                                                   |
| rs945313994 | genic_downstream_transcript_variant,intron_variant                                                 |
| rs945390529 | genic_upstream_transcript_variant,intron_variant                                                   |
| rs945406056 | 5_prime_UTR_variant,genic_upstream_transcript_variant,intron_variant,non_coding_transcript_variant |
| rs945430184 | genic_upstream_transcript_variant,intron_variant                                                   |
| rs945441204 | genic_upstream_transcript_variant,intron_variant                                                   |
| rs945454632 | 3_prime_UTR_variant,genic_downstream_transcript_variant,non_coding_transcript_variant              |
| rs945480908 | genic_upstream_transcript_variant,intron_variant                                                   |
| rs945519525 | intron_variant                                                                                     |
| rs945534705 | genic_upstream_transcript_variant,intron_variant                                                   |
| rs945552393 | intron_variant                                                                                     |
| rs945576045 | genic_upstream_transcript_variant,intron_variant                                                   |
| rs945601619 | genic_upstream_transcript_variant,intron_variant                                                   |
| rs945616058 | genic_upstream_transcript_variant,intron_variant                                                   |
| rs945636938 | synonymous_variant,coding_sequence_variant,non_coding_transcript_variant                           |
| rs945703702 | 2KB_upstream_variant,genic_upstream_transcript_variant,upstream_transcript_variant,intron_variant  |
| rs945711160 | 2KB_upstream_variant,genic_upstream_transcript_variant,upstream_transcript_variant,intron_variant  |
| rs945752443 | genic_upstream_transcript_variant,intron_variant                                                   |
| rs945761764 | intron_variant                                                                                     |
| rs945772377 | intron_variant                                                                                     |
| rs945774532 | genic_upstream_transcript_variant,intron_variant                                                   |
| rs945795163 | downstream_transcript_variant,500B_downstream_variant                                              |

|             |                                                                                                   |
|-------------|---------------------------------------------------------------------------------------------------|
| rs945803382 | intron_variant                                                                                    |
| rs945818084 | genic_upstream_transcript_variant,intron_variant                                                  |
| rs945868643 | genic_upstream_transcript_variant,intron_variant                                                  |
| rs945888704 | genic_upstream_transcript_variant,intron_variant                                                  |
| rs945910574 | genic_upstream_transcript_variant,intron_variant                                                  |
| rs945915429 | missense_variant,coding_sequence_variant,non_coding_transcript_variant                            |
| rs945916202 | 2KB_upstream_variant,genic_upstream_transcript_variant,upstream_transcript_variant,intron_variant |
| rs945922307 | genic_upstream_transcript_variant,intron_variant                                                  |
| rs946026927 | intron_variant                                                                                    |
| rs946031282 | genic_downstream_transcript_variant,intron_variant                                                |
| rs946038990 | genic_downstream_transcript_variant,intron_variant                                                |
| rs946109856 | intron_variant                                                                                    |
| rs946114246 | genic_upstream_transcript_variant,intron_variant                                                  |
| rs946155692 | genic_downstream_transcript_variant,intron_variant                                                |
| rs946158093 | genic_upstream_transcript_variant,intron_variant                                                  |
| rs946197190 | intron_variant                                                                                    |
| rs946246878 | genic_downstream_transcript_variant,intron_variant                                                |
| rs946271316 | genic_downstream_transcript_variant,intron_variant                                                |
| rs946306400 | intron_variant                                                                                    |
| rs946315162 | intron_variant                                                                                    |
| rs946360554 | genic_upstream_transcript_variant,intron_variant                                                  |
| rs946375618 | intron_variant                                                                                    |
| rs946377474 | genic_upstream_transcript_variant,intron_variant                                                  |
| rs946383022 | genic_upstream_transcript_variant,intron_variant                                                  |
| rs946414613 | genic_upstream_transcript_variant,intron_variant                                                  |
| rs946441846 | intron_variant                                                                                    |
| rs946459211 | intron_variant                                                                                    |
| rs946485581 | intron_variant                                                                                    |
| rs946523448 | intron_variant                                                                                    |
| rs946530565 | intron_variant                                                                                    |
| rs946557530 | genic_upstream_transcript_variant,intron_variant                                                  |
| rs946582639 | genic_upstream_transcript_variant,intron_variant                                                  |
| rs946621099 | genic_downstream_transcript_variant,intron_variant                                                |
| rs946674471 | genic_downstream_transcript_variant,intron_variant                                                |
| rs946706901 | genic_downstream_transcript_variant,intron_variant                                                |
| rs946723610 | intron_variant                                                                                    |
| rs946762573 | intron_variant                                                                                    |
| rs946768626 | genic_upstream_transcript_variant,intron_variant                                                  |
| rs946769070 | genic_upstream_transcript_variant,intron_variant                                                  |
| rs946776716 | genic_upstream_transcript_variant,intron_variant                                                  |
| rs946787264 | genic_downstream_transcript_variant,intron_variant                                                |
| rs946804892 | intron_variant                                                                                    |
| rs946845607 | genic_downstream_transcript_variant,intron_variant                                                |
| rs946860788 | upstream_transcript_variant,2KB_upstream_variant,genic_upstream_transcript_variant,intron_variant |
| rs946894955 | genic_downstream_transcript_variant,intron_variant                                                |
| rs946896919 | genic_downstream_transcript_variant,intron_variant                                                |
| rs946918437 | genic_upstream_transcript_variant,intron_variant                                                  |
| rs946948014 | genic_upstream_transcript_variant,intron_variant                                                  |
| rs946979178 | genic_upstream_transcript_variant,intron_variant                                                  |
| rs946979783 | intron_variant                                                                                    |
| rs946984191 | genic_downstream_transcript_variant,intron_variant                                                |
| rs947001461 | intron_variant                                                                                    |
| rs947031445 | genic_upstream_transcript_variant,intron_variant                                                  |
| rs947046038 | genic_downstream_transcript_variant,intron_variant                                                |
| rs947070176 | genic_upstream_transcript_variant,intron_variant                                                  |
| rs947084711 | intron_variant                                                                                    |
| rs947088393 | genic_upstream_transcript_variant,intron_variant                                                  |
| rs947104715 | intron_variant                                                                                    |
| rs947104858 | intron_variant                                                                                    |
| rs947115031 | genic_upstream_transcript_variant,upstream_transcript_variant,intron_variant                      |
| rs947133557 | genic_upstream_transcript_variant,intron_variant                                                  |
| rs947148276 | genic_downstream_transcript_variant,intron_variant                                                |
| rs947162358 | intron_variant                                                                                    |
| rs947195727 | genic_upstream_transcript_variant,intron_variant                                                  |
| rs947252044 | genic_upstream_transcript_variant,intron_variant                                                  |
| rs947285516 | genic_downstream_transcript_variant,intron_variant                                                |
| rs947286606 | genic_upstream_transcript_variant,intron_variant                                                  |
| rs947315567 | intron_variant                                                                                    |
| rs947317611 | genic_upstream_transcript_variant,intron_variant                                                  |
| rs947321313 | genic_downstream_transcript_variant,intron_variant                                                |
| rs947328336 | intron_variant                                                                                    |
| rs947363050 | genic_upstream_transcript_variant,intron_variant                                                  |
| rs947386583 | intron_variant                                                                                    |
| rs947406252 | intron_variant                                                                                    |

|             |                                                                                                    |
|-------------|----------------------------------------------------------------------------------------------------|
| rs947409267 | intron_variant                                                                                     |
| rs947449627 | genic_upstream_transcript_variant,intron_variant                                                   |
| rs947485270 | genic_upstream_transcript_variant,intron_variant                                                   |
| rs947504808 | genic_upstream_transcript_variant,intron_variant                                                   |
| rs947546883 | genic_upstream_transcript_variant,upstream_transcript_variant,intron_variant                       |
| rs947550679 | intron_variant                                                                                     |
| rs947558298 | intron_variant                                                                                     |
| rs947594679 | genic_upstream_transcript_variant,intron_variant                                                   |
| rs947613549 | genic_upstream_transcript_variant,intron_variant                                                   |
| rs947623206 | 2KB_upstream_variant,genic_upstream_transcript_variant,upstream_transcript_variant,intron_variant  |
| rs947646118 | genic_upstream_transcript_variant,intron_variant                                                   |
| rs947700132 | upstream_transcript_variant,2KB_upstream_variant,genic_upstream_transcript_variant,intron_variant  |
| rs947739047 | genic_downstream_transcript_variant,intron_variant                                                 |
| rs947764394 | genic_upstream_transcript_variant,intron_variant                                                   |
| rs947766576 | upstream_transcript_variant,2KB_upstream_variant,genic_upstream_transcript_variant,intron_variant  |
| rs947771129 | genic_upstream_transcript_variant,intron_variant                                                   |
| rs947784095 | intron_variant                                                                                     |
| rs947847297 | genic_upstream_transcript_variant,intron_variant                                                   |
| rs947880495 | genic_upstream_transcript_variant,intron_variant                                                   |
| rs947882403 | intron_variant                                                                                     |
| rs947949854 | genic_downstream_transcript_variant,intron_variant                                                 |
| rs948019304 | intron_variant                                                                                     |
| rs948053275 | genic_downstream_transcript_variant,intron_variant                                                 |
| rs948053852 | genic_downstream_transcript_variant,intron_variant                                                 |
| rs948100918 | genic_upstream_transcript_variant,intron_variant                                                   |
| rs948101299 | genic_upstream_transcript_variant,intron_variant                                                   |
| rs948118556 | intron_variant                                                                                     |
| rs948124260 | 2KB_upstream_variant,genic_upstream_transcript_variant,upstream_transcript_variant,intron_variant  |
| rs948130216 | intron_variant                                                                                     |
| rs948144686 | intron_variant                                                                                     |
| rs948168300 | genic_downstream_transcript_variant,intron_variant                                                 |
| rs948244961 | genic_upstream_transcript_variant,intron_variant                                                   |
| rs948245874 | intron_variant                                                                                     |
| rs948263962 | genic_upstream_transcript_variant,intron_variant                                                   |
| rs948279578 | genic_upstream_transcript_variant,intron_variant                                                   |
| rs948297002 | genic_upstream_transcript_variant,intron_variant                                                   |
| rs948350190 | genic_upstream_transcript_variant,upstream_transcript_variant,intron_variant                       |
| rs948354471 | genic_upstream_transcript_variant,intron_variant                                                   |
| rs948360059 | intron_variant                                                                                     |
| rs948432113 | intron_variant                                                                                     |
| rs948434486 | genic_downstream_transcript_variant,intron_variant                                                 |
| rs948456455 | genic_upstream_transcript_variant,intron_variant                                                   |
| rs948459169 | 5_prime_UTR_variant,genic_upstream_transcript_variant,intron_variant,non_coding_transcript_variant |
| rs948459755 | intron_variant                                                                                     |
| rs948464844 | intron_variant                                                                                     |
| rs948470900 | genic_upstream_transcript_variant,intron_variant                                                   |
| rs948473205 | 5_prime_UTR_variant,genic_upstream_transcript_variant,intron_variant,non_coding_transcript_variant |
| rs948499579 | intron_variant                                                                                     |
| rs948500064 | genic_downstream_transcript_variant,intron_variant                                                 |
| rs948500570 | genic_upstream_transcript_variant,intron_variant                                                   |
| rs948561730 | genic_downstream_transcript_variant,intron_variant                                                 |
| rs948581524 | genic_upstream_transcript_variant,intron_variant                                                   |
| rs948612309 | genic_upstream_transcript_variant,upstream_transcript_variant,intron_variant                       |
| rs948638373 | genic_upstream_transcript_variant,intron_variant                                                   |
| rs948646656 | genic_downstream_transcript_variant,intron_variant                                                 |
| rs948659431 | genic_upstream_transcript_variant,intron_variant                                                   |
| rs948664287 | intron_variant                                                                                     |
| rs948666333 | intron_variant                                                                                     |
| rs948693196 | intron_variant                                                                                     |
| rs948720943 | genic_upstream_transcript_variant,intron_variant                                                   |
| rs948734115 | genic_downstream_transcript_variant,intron_variant                                                 |
| rs948761716 | genic_upstream_transcript_variant,intron_variant                                                   |
| rs948777033 | intron_variant                                                                                     |
| rs948795817 | genic_downstream_transcript_variant,intron_variant                                                 |
| rs948853507 | genic_upstream_transcript_variant,intron_variant                                                   |
| rs948862756 | intron_variant                                                                                     |
| rs948863634 | genic_downstream_transcript_variant,intron_variant                                                 |
| rs948896472 | genic_downstream_transcript_variant,intron_variant                                                 |
| rs948952260 | genic_upstream_transcript_variant,intron_variant                                                   |
| rs948955158 | intron_variant                                                                                     |
| rs949000945 | intron_variant                                                                                     |
| rs949001695 | genic_upstream_transcript_variant,intron_variant                                                   |
| rs949030256 | intron_variant                                                                                     |
| rs949044011 | genic_downstream_transcript_variant,intron_variant                                                 |

|             |                                                                                                                         |
|-------------|-------------------------------------------------------------------------------------------------------------------------|
| rs949084427 | genic_downstream_transcript_variant,intron_variant                                                                      |
| rs949102878 | genic_upstream_transcript_variant,intron_variant                                                                        |
| rs949107252 | intron_variant                                                                                                          |
| rs949115024 | genic_downstream_transcript_variant,intron_variant                                                                      |
| rs949121860 | intron_variant                                                                                                          |
| rs949154878 | intron_variant                                                                                                          |
| rs949166349 | genic_downstream_transcript_variant,intron_variant                                                                      |
| rs949268377 | genic_upstream_transcript_variant,intron_variant                                                                        |
| rs949295930 | intron_variant                                                                                                          |
| rs949317105 | downstream_transcript_variant,genic_downstream_transcript_variant,intron_variant                                        |
| rs949318941 | genic_upstream_transcript_variant,intron_variant                                                                        |
| rs949334018 | genic_upstream_transcript_variant,intron_variant                                                                        |
| rs949361084 | intron_variant                                                                                                          |
| rs949381369 | intron_variant                                                                                                          |
| rs949414460 | genic_upstream_transcript_variant,intron_variant                                                                        |
| rs949417684 | genic_upstream_transcript_variant,intron_variant                                                                        |
| rs949421010 | intron_variant                                                                                                          |
| rs949457882 | 3_prime_UTR_variant,genic_downstream_transcript_variant,non_coding_transcript_variant                                   |
| rs949527353 | intron_variant                                                                                                          |
| rs949534791 | genic_upstream_transcript_variant,intron_variant                                                                        |
| rs949539298 | genic_downstream_transcript_variant,intron_variant                                                                      |
| rs949547891 | intron_variant                                                                                                          |
| rs949562610 | genic_upstream_transcript_variant,intron_variant                                                                        |
| rs949570419 | genic_downstream_transcript_variant,intron_variant                                                                      |
| rs949601874 | genic_upstream_transcript_variant,intron_variant                                                                        |
| rs949628131 | intron_variant                                                                                                          |
| rs949638688 | upstream_transcript_variant,2KB_upstream_variant,genic_upstream_transcript_variant,intron_variant                       |
| rs949638974 | upstream_transcript_variant,2KB_upstream_variant,genic_upstream_transcript_variant,intron_variant                       |
| rs949691189 | genic_upstream_transcript_variant,intron_variant                                                                        |
| rs949694045 | intron_variant                                                                                                          |
| rs949753775 | genic_downstream_transcript_variant,intron_variant                                                                      |
| rs949765512 | missense_variant,genic_upstream_transcript_variant,intron_variant,coding_sequence_variant,non_coding_transcript_variant |
| rs949810826 | intron_variant                                                                                                          |
| rs949869171 | genic_downstream_transcript_variant,intron_variant                                                                      |
| rs949885756 | genic_upstream_transcript_variant,intron_variant                                                                        |
| rs949901709 | genic_downstream_transcript_variant,intron_variant                                                                      |
| rs949941126 | intron_variant                                                                                                          |
| rs949958462 | intron_variant                                                                                                          |
| rs949969012 | genic_upstream_transcript_variant,intron_variant                                                                        |
| rs950010800 | genic_upstream_transcript_variant,intron_variant                                                                        |
| rs950023253 | genic_upstream_transcript_variant,intron_variant                                                                        |
| rs950077902 | genic_upstream_transcript_variant,intron_variant                                                                        |
| rs950100784 | genic_upstream_transcript_variant,intron_variant                                                                        |
| rs950135613 | genic_upstream_transcript_variant,intron_variant                                                                        |
| rs950143102 | intron_variant                                                                                                          |
| rs950211327 | genic_upstream_transcript_variant,intron_variant                                                                        |
| rs950242886 | genic_upstream_transcript_variant,intron_variant                                                                        |
| rs950260100 | intron_variant                                                                                                          |
| rs950293741 | intron_variant                                                                                                          |
| rs950412565 | intron_variant                                                                                                          |
| rs950501441 | intron_variant                                                                                                          |
| rs950518668 | genic_upstream_transcript_variant,intron_variant                                                                        |
| rs950567473 | intron_variant                                                                                                          |
| rs950583053 | intron_variant                                                                                                          |
| rs950590012 | genic_upstream_transcript_variant,intron_variant                                                                        |
| rs950597106 | intron_variant                                                                                                          |
| rs950624770 | genic_upstream_transcript_variant,intron_variant                                                                        |
| rs950657237 | genic_upstream_transcript_variant,intron_variant                                                                        |
| rs950659484 | genic_upstream_transcript_variant,intron_variant                                                                        |
| rs950664695 | genic_downstream_transcript_variant,intron_variant                                                                      |
| rs950737958 | intron_variant                                                                                                          |
| rs950739799 | intron_variant                                                                                                          |
| rs950741227 | genic_downstream_transcript_variant,intron_variant                                                                      |
| rs950778489 | intron_variant                                                                                                          |
| rs950817172 | genic_downstream_transcript_variant,intron_variant                                                                      |
| rs950879791 | intron_variant                                                                                                          |
| rs950885374 | missense_variant,genic_upstream_transcript_variant,intron_variant,coding_sequence_variant,non_coding_transcript_variant |
| rs950886444 | intron_variant                                                                                                          |
| rs950910799 | genic_upstream_transcript_variant,intron_variant                                                                        |
| rs950967895 | genic_downstream_transcript_variant,intron_variant                                                                      |
| rs950977522 | intron_variant                                                                                                          |
| rs951053003 | intron_variant                                                                                                          |
| rs951061949 | intron_variant                                                                                                          |
| rs951080604 | intron_variant                                                                                                          |

|             |                                                                                                              |
|-------------|--------------------------------------------------------------------------------------------------------------|
| rs951142751 | genic_downstream_transcript_variant,intron_variant                                                           |
| rs951160206 | intron_variant                                                                                               |
| rs951172371 | genic_upstream_transcript_variant,intron_variant                                                             |
| rs951196432 | genic_downstream_transcript_variant,intron_variant                                                           |
| rs951203761 | intron_variant                                                                                               |
| rs951234605 | genic_downstream_transcript_variant,intron_variant                                                           |
| rs951239111 | genic_upstream_transcript_variant,intron_variant                                                             |
| rs951284699 | intron_variant                                                                                               |
| rs951328901 | genic_downstream_transcript_variant,intron_variant                                                           |
| rs951352029 | genic_downstream_transcript_variant,intron_variant                                                           |
| rs951364963 | intron_variant                                                                                               |
| rs951397048 | genic_upstream_transcript_variant,intron_variant                                                             |
| rs951400556 | intron_variant                                                                                               |
| rs951408085 | genic_upstream_transcript_variant,intron_variant                                                             |
| rs951421329 | genic_upstream_transcript_variant,intron_variant                                                             |
| rs951424321 | genic_upstream_transcript_variant,intron_variant                                                             |
| rs951451504 | genic_upstream_transcript_variant,intron_variant                                                             |
| rs951483751 | genic_upstream_transcript_variant,intron_variant                                                             |
| rs951501402 | genic_upstream_transcript_variant,intron_variant                                                             |
| rs951505014 | intron_variant                                                                                               |
| rs951536797 | genic_upstream_transcript_variant,intron_variant                                                             |
| rs951542472 | intron_variant                                                                                               |
| rs951574893 | genic_upstream_transcript_variant,intron_variant                                                             |
| rs951610837 | genic_upstream_transcript_variant,intron_variant                                                             |
| rs951664973 | intron_variant                                                                                               |
| rs951676513 | genic_upstream_transcript_variant,intron_variant                                                             |
| rs951676943 | 3_prime_UTR_variant,genic_downstream_transcript_variant,non_coding_transcript_variant                        |
| rs951688640 | genic_upstream_transcript_variant,intron_variant                                                             |
| rs951691629 | intron_variant                                                                                               |
| rs951733308 | genic_upstream_transcript_variant,intron_variant                                                             |
| rs951734313 | intron_variant                                                                                               |
| rs951784331 | genic_upstream_transcript_variant,intron_variant                                                             |
| rs951790254 | intron_variant                                                                                               |
| rs951793364 | intron_variant                                                                                               |
| rs951813236 | 3_prime_UTR_variant,genic_downstream_transcript_variant,non_coding_transcript_variant                        |
| rs951818323 | intron_variant                                                                                               |
| rs951833683 | genic_upstream_transcript_variant,intron_variant                                                             |
| rs951852904 | intron_variant                                                                                               |
| rs951875499 | genic_downstream_transcript_variant,intron_variant                                                           |
| rs951910729 | intron_variant                                                                                               |
| rs951910998 | upstream_transcript_variant,2KB_upstream_variant,genic_upstream_transcript_variant,intron_variant            |
| rs951927034 | synonymous_variant,genic_downstream_transcript_variant,coding_sequence_variant,non_coding_transcript_variant |
| rs951938308 | genic_upstream_transcript_variant,intron_variant                                                             |
| rs951949650 | genic_downstream_transcript_variant,intron_variant                                                           |
| rs951955453 | genic_downstream_transcript_variant,intron_variant                                                           |
| rs951974857 | intron_variant                                                                                               |
| rs951977896 | intron_variant                                                                                               |
| rs952022664 | genic_upstream_transcript_variant,intron_variant                                                             |
| rs952035125 | intron_variant                                                                                               |
| rs952058097 | intron_variant                                                                                               |
| rs952061154 | genic_upstream_transcript_variant,intron_variant                                                             |
| rs952075414 | downstream_transcript_variant,500B_downstream_variant                                                        |
| rs952080437 | genic_upstream_transcript_variant,intron_variant                                                             |
| rs952092063 | 2KB_upstream_variant,genic_upstream_transcript_variant,upstream_transcript_variant,intron_variant            |
| rs952096283 | genic_upstream_transcript_variant,intron_variant                                                             |
| rs952113592 | genic_upstream_transcript_variant,intron_variant                                                             |
| rs952188821 | genic_upstream_transcript_variant,intron_variant                                                             |
| rs952191427 | genic_upstream_transcript_variant,intron_variant                                                             |
| rs952204490 | intron_variant                                                                                               |
| rs952207512 | genic_upstream_transcript_variant,intron_variant                                                             |
| rs952217925 | intron_variant                                                                                               |
| rs952267811 | 2KB_upstream_variant,genic_upstream_transcript_variant,upstream_transcript_variant,intron_variant            |
| rs952276854 | intron_variant                                                                                               |
| rs952355045 | genic_upstream_transcript_variant,intron_variant                                                             |
| rs952356006 | genic_upstream_transcript_variant,intron_variant                                                             |
| rs952394205 | genic_upstream_transcript_variant,intron_variant                                                             |
| rs952505203 | intron_variant                                                                                               |
| rs952533058 | genic_upstream_transcript_variant,intron_variant                                                             |
| rs952592263 | 2KB_upstream_variant,genic_upstream_transcript_variant,upstream_transcript_variant,intron_variant            |
| rs952628533 | intron_variant                                                                                               |
| rs952650358 | genic_upstream_transcript_variant,intron_variant                                                             |
| rs952662891 | intron_variant                                                                                               |
| rs952665403 | intron_variant                                                                                               |
| rs952709715 | upstream_transcript_variant,2KB_upstream_variant,genic_upstream_transcript_variant,intron_variant            |

|             |                                                                                                   |
|-------------|---------------------------------------------------------------------------------------------------|
| rs952820114 | intron_variant                                                                                    |
| rs952871672 | genic_upstream_transcript_variant,intron_variant                                                  |
| rs952888824 | genic_downstream_transcript_variant,intron_variant                                                |
| rs952907639 | intron_variant                                                                                    |
| rs952944258 | genic_downstream_transcript_variant,intron_variant                                                |
| rs952960371 | genic_upstream_transcript_variant,upstream_transcript_variant,intron_variant                      |
| rs952968244 | genic_downstream_transcript_variant,intron_variant                                                |
| rs952978826 | genic_upstream_transcript_variant,intron_variant                                                  |
| rs953038424 | genic_upstream_transcript_variant,intron_variant                                                  |
| rs953066010 | intron_variant                                                                                    |
| rs953086220 | 3_prime_UTR_variant,genic_downstream_transcript_variant,non_coding_transcript_variant             |
| rs953112329 | 2KB_upstream_variant,genic_upstream_transcript_variant,upstream_transcript_variant,intron_variant |
| rs953123032 | intron_variant                                                                                    |
| rs953137438 | intron_variant                                                                                    |
| rs953139413 | intron_variant                                                                                    |
| rs953142424 | genic_downstream_transcript_variant,intron_variant                                                |
| rs953168404 | intron_variant                                                                                    |
| rs953194200 | genic_downstream_transcript_variant,intron_variant                                                |
| rs953218728 | upstream_transcript_variant,2KB_upstream_variant,genic_upstream_transcript_variant,intron_variant |
| rs953234197 | 2KB_upstream_variant,genic_upstream_transcript_variant,upstream_transcript_variant,intron_variant |
| rs953237572 | genic_upstream_transcript_variant,intron_variant                                                  |
| rs953238108 | genic_upstream_transcript_variant,intron_variant                                                  |
| rs953250144 | genic_downstream_transcript_variant,intron_variant                                                |
| rs953279995 | genic_upstream_transcript_variant,intron_variant                                                  |
| rs953306848 | genic_downstream_transcript_variant,intron_variant                                                |
| rs953308814 | genic_upstream_transcript_variant,intron_variant                                                  |
| rs953326774 | genic_upstream_transcript_variant,intron_variant                                                  |
| rs953347085 | genic_downstream_transcript_variant,intron_variant                                                |
| rs953352465 | intron_variant                                                                                    |
| rs953387489 | intron_variant                                                                                    |
| rs953407799 | genic_upstream_transcript_variant,intron_variant                                                  |
| rs953411428 | 2KB_upstream_variant,genic_upstream_transcript_variant,upstream_transcript_variant,intron_variant |
| rs953451655 | upstream_transcript_variant,2KB_upstream_variant,genic_upstream_transcript_variant,intron_variant |
| rs953465169 | genic_upstream_transcript_variant,intron_variant                                                  |
| rs953539461 | genic_upstream_transcript_variant,intron_variant                                                  |
| rs953551447 | intron_variant                                                                                    |
| rs953561418 | genic_downstream_transcript_variant,intron_variant                                                |
| rs953686961 | genic_upstream_transcript_variant,intron_variant                                                  |
| rs953750463 | intron_variant                                                                                    |
| rs953801529 | genic_upstream_transcript_variant,intron_variant                                                  |
| rs953803645 | intron_variant                                                                                    |
| rs953816066 | intron_variant                                                                                    |
| rs953844543 | genic_upstream_transcript_variant,intron_variant                                                  |
| rs953958858 | intron_variant                                                                                    |
| rs953969205 | genic_upstream_transcript_variant,intron_variant                                                  |
| rs954009308 | upstream_transcript_variant,intron_variant,genic_upstream_transcript_variant,2KB_upstream_variant |
| rs954031858 | intron_variant                                                                                    |
| rs954038473 | intron_variant,genic_upstream_transcript_variant                                                  |
| rs954067534 | intron_variant,genic_downstream_transcript_variant                                                |
| rs954097741 | intron_variant                                                                                    |
| rs954116065 | intron_variant,genic_upstream_transcript_variant                                                  |
| rs954146778 | intron_variant,genic_downstream_transcript_variant                                                |
| rs954147188 | intron_variant,genic_upstream_transcript_variant                                                  |
| rs954212754 | intron_variant,genic_downstream_transcript_variant                                                |
| rs954244475 | intron_variant                                                                                    |
| rs954256692 | intron_variant                                                                                    |
| rs954275822 | intron_variant,downstream_transcript_variant,genic_downstream_transcript_variant                  |
| rs954290109 | intron_variant                                                                                    |
| rs954338953 | intron_variant,genic_downstream_transcript_variant                                                |
| rs954340307 | intron_variant,genic_upstream_transcript_variant,upstream_transcript_variant,2KB_upstream_variant |
| rs954341341 | intron_variant,genic_upstream_transcript_variant                                                  |
| rs954360561 | intron_variant,genic_upstream_transcript_variant                                                  |
| rs954375089 | intron_variant,genic_downstream_transcript_variant                                                |
| rs954407259 | intron_variant,genic_downstream_transcript_variant                                                |
| rs954419715 | intron_variant,genic_upstream_transcript_variant                                                  |
| rs954448042 | intron_variant,genic_downstream_transcript_variant                                                |
| rs954448635 | intron_variant                                                                                    |
| rs954505450 | intron_variant,genic_downstream_transcript_variant                                                |
| rs954543426 | intron_variant                                                                                    |
| rs954551250 | intron_variant,genic_downstream_transcript_variant                                                |
| rs954564323 | intron_variant,genic_upstream_transcript_variant                                                  |
| rs954654953 | intron_variant                                                                                    |
| rs954668667 | intron_variant                                                                                    |
| rs954670676 | intron_variant,genic_upstream_transcript_variant                                                  |

|             |                                                                                                   |
|-------------|---------------------------------------------------------------------------------------------------|
| rs954678195 | intron_variant,genic_downstream_transcript_variant                                                |
| rs954714202 | intron_variant                                                                                    |
| rs954757282 | intron_variant                                                                                    |
| rs954805577 | upstream_transcript_variant,5_prime_UTR_variant,intron_variant,genic_upstream_transcript_variant  |
| rs954819857 | intron_variant,genic_upstream_transcript_variant                                                  |
| rs954844471 | intron_variant                                                                                    |
| rs954901593 | intron_variant                                                                                    |
| rs954913522 | intron_variant                                                                                    |
| rs954915540 | intron_variant,genic_upstream_transcript_variant,upstream_transcript_variant,2KB_upstream_variant |
| rs954926811 | intron_variant                                                                                    |
| rs954929033 | intron_variant,genic_upstream_transcript_variant                                                  |
| rs954947537 | intron_variant,genic_upstream_transcript_variant                                                  |
| rs954948813 | intron_variant,genic_upstream_transcript_variant                                                  |
| rs954997919 | intron_variant,upstream_transcript_variant,genic_upstream_transcript_variant                      |
| rs955008706 | intron_variant,genic_downstream_transcript_variant                                                |
| rs955040287 | intron_variant,genic_upstream_transcript_variant                                                  |
| rs955054240 | intron_variant,genic_upstream_transcript_variant                                                  |
| rs955074604 | intron_variant,genic_upstream_transcript_variant                                                  |
| rs955086606 | intron_variant                                                                                    |
| rs955090791 | intron_variant,upstream_transcript_variant,genic_upstream_transcript_variant                      |
| rs955108480 | intron_variant,genic_upstream_transcript_variant                                                  |
| rs955131483 | intron_variant,genic_downstream_transcript_variant                                                |
| rs955144079 | intron_variant,genic_downstream_transcript_variant                                                |
| rs955229338 | intron_variant,genic_upstream_transcript_variant                                                  |
| rs955242591 | intron_variant                                                                                    |
| rs955243579 | intron_variant                                                                                    |
| rs955261936 | intron_variant,genic_upstream_transcript_variant                                                  |
| rs955262359 | intron_variant                                                                                    |
| rs955272941 | intron_variant,genic_upstream_transcript_variant,upstream_transcript_variant,2KB_upstream_variant |
| rs955280877 | intron_variant                                                                                    |
| rs955282331 | intron_variant,genic_upstream_transcript_variant                                                  |
| rs955290653 | intron_variant,genic_upstream_transcript_variant                                                  |
| rs955300938 | intron_variant,genic_upstream_transcript_variant                                                  |
| rs955326362 | intron_variant,genic_downstream_transcript_variant                                                |
| rs955353017 | intron_variant,genic_upstream_transcript_variant                                                  |
| rs955365648 | intron_variant                                                                                    |
| rs955375563 | intron_variant                                                                                    |
| rs955392204 | intron_variant                                                                                    |
| rs955443398 | intron_variant,genic_upstream_transcript_variant                                                  |
| rs955443870 | intron_variant,genic_upstream_transcript_variant                                                  |
| rs955503771 | intron_variant                                                                                    |
| rs955540411 | intron_variant,genic_downstream_transcript_variant                                                |
| rs955567094 | intron_variant,genic_upstream_transcript_variant                                                  |
| rs955597392 | intron_variant,genic_upstream_transcript_variant                                                  |
| rs955628663 | intron_variant                                                                                    |
| rs955670792 | intron_variant                                                                                    |
| rs955681263 | intron_variant                                                                                    |
| rs955730089 | intron_variant,genic_upstream_transcript_variant                                                  |
| rs955753124 | intron_variant,genic_upstream_transcript_variant                                                  |
| rs955765721 | intron_variant,genic_downstream_transcript_variant                                                |
| rs955806532 | intron_variant                                                                                    |
| rs955811841 | intron_variant,genic_upstream_transcript_variant                                                  |
| rs955821328 | intron_variant,genic_upstream_transcript_variant                                                  |
| rs955836782 | intron_variant,genic_downstream_transcript_variant                                                |
| rs955855423 | non_coding_transcript_variant,3_prime_UTR_variant,genic_downstream_transcript_variant             |
| rs955858324 | intron_variant,genic_downstream_transcript_variant                                                |
| rs955873518 | intron_variant,genic_upstream_transcript_variant                                                  |
| rs955878524 | intron_variant,genic_downstream_transcript_variant                                                |
| rs955894517 | intron_variant,genic_upstream_transcript_variant                                                  |
| rs955912675 | intron_variant                                                                                    |
| rs955928599 | intron_variant,genic_upstream_transcript_variant                                                  |
| rs955943264 | intron_variant                                                                                    |
| rs955957142 | intron_variant,upstream_transcript_variant,genic_upstream_transcript_variant                      |
| rs955999291 | intron_variant,genic_upstream_transcript_variant                                                  |
| rs956023923 | intron_variant                                                                                    |
| rs956034601 | intron_variant                                                                                    |
| rs956048117 | intron_variant                                                                                    |
| rs956096507 | intron_variant,genic_downstream_transcript_variant                                                |
| rs956105088 | intron_variant                                                                                    |
| rs956110498 | intron_variant,genic_upstream_transcript_variant                                                  |
| rs956142707 | intron_variant                                                                                    |
| rs956179665 | intron_variant                                                                                    |
| rs956208850 | intron_variant                                                                                    |
| rs956218214 | intron_variant,upstream_transcript_variant,genic_upstream_transcript_variant                      |

|             |                                                                                                            |
|-------------|------------------------------------------------------------------------------------------------------------|
| rs956223063 | intron_variant                                                                                             |
| rs956233399 | intron_variant,genic_downstream_transcript_variant                                                         |
| rs956256379 | intron_variant,genic_upstream_transcript_variant                                                           |
| rs956284675 | intron_variant                                                                                             |
| rs956328465 | intron_variant,genic_upstream_transcript_variant                                                           |
| rs956385253 | intron_variant                                                                                             |
| rs956403076 | intron_variant                                                                                             |
| rs956430569 | intron_variant,genic_upstream_transcript_variant                                                           |
| rs956432937 | intron_variant,genic_downstream_transcript_variant                                                         |
| rs956448237 | intron_variant,genic_upstream_transcript_variant                                                           |
| rs956484167 | intron_variant                                                                                             |
| rs956490139 | intron_variant,genic_upstream_transcript_variant                                                           |
| rs956502956 | intron_variant,genic_upstream_transcript_variant                                                           |
| rs956524122 | intron_variant,genic_upstream_transcript_variant                                                           |
| rs956590814 | intron_variant,genic_upstream_transcript_variant                                                           |
| rs956597576 | intron_variant,genic_upstream_transcript_variant                                                           |
| rs956612804 | intron_variant                                                                                             |
| rs956640223 | intron_variant                                                                                             |
| rs956655362 | intron_variant,genic_upstream_transcript_variant                                                           |
| rs956672615 | intron_variant                                                                                             |
| rs956716543 | intron_variant,genic_upstream_transcript_variant                                                           |
| rs956723530 | intron_variant                                                                                             |
| rs956740304 | intron_variant                                                                                             |
| rs956752638 | intron_variant,genic_upstream_transcript_variant                                                           |
| rs956775547 | intron_variant,genic_downstream_transcript_variant                                                         |
| rs956827205 | missense_variant,non_coding_transcript_variant,genic_downstream_transcript_variant,coding_sequence_variant |
| rs956842708 | intron_variant,genic_downstream_transcript_variant                                                         |
| rs956858347 | intron_variant                                                                                             |
| rs956893669 | intron_variant,genic_upstream_transcript_variant                                                           |
| rs956975159 | intron_variant,genic_downstream_transcript_variant                                                         |
| rs956988171 | intron_variant                                                                                             |
| rs957003429 | intron_variant,genic_upstream_transcript_variant                                                           |
| rs957006381 | intron_variant                                                                                             |
| rs957018595 | intron_variant                                                                                             |
| rs957048930 | intron_variant                                                                                             |
| rs957090321 | intron_variant,genic_downstream_transcript_variant                                                         |
| rs957096455 | intron_variant,genic_downstream_transcript_variant                                                         |
| rs957098381 | intron_variant                                                                                             |
| rs957112748 | intron_variant                                                                                             |
| rs957164450 | intron_variant,genic_upstream_transcript_variant                                                           |
| rs957206460 | intron_variant,genic_upstream_transcript_variant                                                           |
| rs957239330 | intron_variant,genic_downstream_transcript_variant                                                         |
| rs957286760 | intron_variant                                                                                             |
| rs957299889 | intron_variant                                                                                             |
| rs957321826 | non_coding_transcript_variant,3_prime_UTR_variant,genic_downstream_transcript_variant                      |
| rs957331150 | intron_variant                                                                                             |
| rs957353501 | intron_variant,genic_downstream_transcript_variant                                                         |
| rs957360240 | intron_variant                                                                                             |
| rs957364729 | intron_variant,genic_upstream_transcript_variant                                                           |
| rs957369120 | intron_variant                                                                                             |
| rs957398810 | intron_variant,genic_downstream_transcript_variant                                                         |
| rs957399845 | intron_variant,genic_upstream_transcript_variant                                                           |
| rs957417995 | intron_variant,genic_upstream_transcript_variant                                                           |
| rs957419248 | intron_variant,genic_upstream_transcript_variant                                                           |
| rs957448661 | intron_variant,genic_upstream_transcript_variant                                                           |
| rs957452788 | intron_variant                                                                                             |
| rs957491171 | intron_variant,genic_upstream_transcript_variant                                                           |
| rs957500862 | intron_variant,genic_upstream_transcript_variant,upstream_transcript_variant,2KB_upstream_variant          |
| rs957519994 | intron_variant,genic_upstream_transcript_variant                                                           |
| rs957524344 | intron_variant,genic_downstream_transcript_variant                                                         |
| rs957531308 | intron_variant                                                                                             |
| rs957551179 | intron_variant,genic_upstream_transcript_variant                                                           |
| rs957556005 | intron_variant,genic_upstream_transcript_variant                                                           |
| rs957569916 | intron_variant                                                                                             |
| rs957576419 | intron_variant,genic_downstream_transcript_variant                                                         |
| rs957600992 | intron_variant,genic_upstream_transcript_variant                                                           |
| rs957608977 | intron_variant                                                                                             |
| rs957635634 | intron_variant,genic_downstream_transcript_variant                                                         |
| rs957660407 | intron_variant                                                                                             |
| rs957666091 | intron_variant                                                                                             |
| rs957726590 | intron_variant,genic_upstream_transcript_variant                                                           |
| rs957750045 | upstream_transcript_variant,intron_variant,genic_upstream_transcript_variant,2KB_upstream_variant          |
| rs957795484 | intron_variant                                                                                             |
| rs957854291 | intron_variant,genic_upstream_transcript_variant                                                           |

|             |                                                                                                   |
|-------------|---------------------------------------------------------------------------------------------------|
| rs957882896 | upstream_transcript_variant,intron_variant,genic_upstream_transcript_variant,2KB_upstream_variant |
| rs957884483 | intron_variant,genic_upstream_transcript_variant                                                  |
| rs957904649 | intron_variant,genic_downstream_transcript_variant                                                |
| rs957908824 | intron_variant                                                                                    |
| rs957914699 | intron_variant,genic_upstream_transcript_variant                                                  |
| rs957932359 | intron_variant                                                                                    |
| rs958006275 | intron_variant                                                                                    |
| rs958007364 | intron_variant,genic_upstream_transcript_variant                                                  |
| rs958041666 | intron_variant                                                                                    |
| rs958057365 | intron_variant,genic_downstream_transcript_variant                                                |
| rs958077211 | intron_variant                                                                                    |
| rs958141288 | intron_variant,genic_upstream_transcript_variant                                                  |
| rs958171282 | intron_variant,genic_downstream_transcript_variant                                                |
| rs958186057 | non_coding_transcript_variant,3_prime_UTR_variant,genic_downstream_transcript_variant             |
| rs958190197 | intron_variant,genic_upstream_transcript_variant                                                  |
| rs958202578 | intron_variant,genic_downstream_transcript_variant                                                |
| rs958207744 | intron_variant,genic_upstream_transcript_variant                                                  |
| rs958223072 | intron_variant                                                                                    |
| rs958249902 | intron_variant,genic_upstream_transcript_variant                                                  |
| rs958294696 | intron_variant,genic_upstream_transcript_variant                                                  |
| rs958298442 | intron_variant,genic_upstream_transcript_variant                                                  |
| rs958319884 | non_coding_transcript_variant,3_prime_UTR_variant,genic_downstream_transcript_variant             |
| rs958331591 | intron_variant,genic_upstream_transcript_variant,upstream_transcript_variant,2KB_upstream_variant |
| rs958386295 | intron_variant,genic_upstream_transcript_variant                                                  |
| rs958398830 | intron_variant                                                                                    |
| rs958421392 | intron_variant                                                                                    |
| rs958425362 | intron_variant,genic_upstream_transcript_variant,upstream_transcript_variant,2KB_upstream_variant |
| rs958447975 | intron_variant                                                                                    |
| rs958553879 | intron_variant                                                                                    |
| rs958596529 | intron_variant,genic_upstream_transcript_variant                                                  |
| rs958623193 | intron_variant,genic_downstream_transcript_variant                                                |
| rs958634375 | intron_variant,genic_upstream_transcript_variant                                                  |
| rs958673682 | intron_variant                                                                                    |
| rs958742211 | intron_variant,genic_upstream_transcript_variant                                                  |
| rs958757850 | intron_variant,genic_upstream_transcript_variant                                                  |
| rs958775220 | intron_variant,genic_downstream_transcript_variant                                                |
| rs958781890 | intron_variant                                                                                    |
| rs958785228 | intron_variant,genic_upstream_transcript_variant                                                  |
| rs958893416 | intron_variant                                                                                    |
| rs958910809 | intron_variant                                                                                    |
| rs958928340 | intron_variant,genic_downstream_transcript_variant                                                |
| rs958932854 | intron_variant                                                                                    |
| rs958980696 | intron_variant,genic_upstream_transcript_variant                                                  |
| rs958995697 | intron_variant,genic_downstream_transcript_variant                                                |
| rs959007774 | intron_variant                                                                                    |
| rs959055914 | intron_variant,genic_upstream_transcript_variant                                                  |
| rs959112855 | intron_variant,genic_upstream_transcript_variant                                                  |
| rs959140310 | intron_variant,genic_downstream_transcript_variant                                                |
| rs959142856 | intron_variant                                                                                    |
| rs959197596 | intron_variant,genic_downstream_transcript_variant                                                |
| rs959210215 | upstream_transcript_variant,intron_variant,genic_upstream_transcript_variant,2KB_upstream_variant |
| rs959211105 | intron_variant,genic_upstream_transcript_variant                                                  |
| rs959235796 | intron_variant                                                                                    |
| rs959238978 | intron_variant,genic_upstream_transcript_variant                                                  |
| rs959294309 | intron_variant,genic_downstream_transcript_variant                                                |
| rs959323092 | intron_variant,genic_upstream_transcript_variant                                                  |
| rs959353480 | intron_variant                                                                                    |
| rs959360621 | intron_variant,genic_upstream_transcript_variant                                                  |
| rs959424835 | intron_variant,genic_upstream_transcript_variant                                                  |
| rs959432467 | intron_variant,genic_downstream_transcript_variant                                                |
| rs959468785 | intron_variant                                                                                    |
| rs959506329 | intron_variant                                                                                    |
| rs959508015 | intron_variant,genic_downstream_transcript_variant                                                |
| rs959615656 | intron_variant,genic_upstream_transcript_variant                                                  |
| rs959625002 | 500B_downstream_variant,downstream_transcript_variant                                             |
| rs959677295 | intron_variant                                                                                    |
| rs959749472 | intron_variant                                                                                    |
| rs959775515 | intron_variant,genic_downstream_transcript_variant                                                |
| rs959825983 | intron_variant,genic_upstream_transcript_variant                                                  |
| rs959828891 | intron_variant,genic_downstream_transcript_variant                                                |
| rs959831909 | intron_variant,genic_upstream_transcript_variant                                                  |
| rs959832841 | intron_variant                                                                                    |
| rs959841200 | intron_variant                                                                                    |
| rs959908104 | intron_variant                                                                                    |

|             |                                                                                                  |
|-------------|--------------------------------------------------------------------------------------------------|
| rs959918754 | intron_variant,genic_downstream_transcript_variant                                               |
| rs959925049 | intron_variant,upstream_transcript_variant,genic_upstream_transcript_variant                     |
| rs959940426 | intron_variant,genic_upstream_transcript_variant                                                 |
| rs959957077 | intron_variant,genic_upstream_transcript_variant                                                 |
| rs959971398 | intron_variant,genic_downstream_transcript_variant                                               |
| rs959979677 | intron_variant                                                                                   |
| rs960005386 | intron_variant,genic_upstream_transcript_variant                                                 |
| rs960010988 | intron_variant                                                                                   |
| rs960050267 | intron_variant                                                                                   |
| rs960068507 | intron_variant,genic_upstream_transcript_variant                                                 |
| rs960068655 | intron_variant,genic_upstream_transcript_variant                                                 |
| rs960145378 | intron_variant                                                                                   |
| rs960154393 | intron_variant,genic_downstream_transcript_variant                                               |
| rs960173052 | intron_variant                                                                                   |
| rs960202065 | intron_variant                                                                                   |
| rs960220357 | intron_variant,genic_upstream_transcript_variant                                                 |
| rs960243191 | intron_variant,genic_downstream_transcript_variant                                               |
| rs960256756 | intron_variant                                                                                   |
| rs960269559 | intron_variant                                                                                   |
| rs960313441 | intron_variant,genic_downstream_transcript_variant                                               |
| rs960314842 | intron_variant,genic_downstream_transcript_variant                                               |
| rs960318632 | intron_variant,genic_upstream_transcript_variant                                                 |
| rs960356463 | intron_variant                                                                                   |
| rs960371921 | intron_variant,genic_downstream_transcript_variant                                               |
| rs960381670 | intron_variant                                                                                   |
| rs960496419 | intron_variant,genic_upstream_transcript_variant                                                 |
| rs960505947 | intron_variant,genic_upstream_transcript_variant                                                 |
| rs960516478 | intron_variant,genic_upstream_transcript_variant                                                 |
| rs960551179 | intron_variant,genic_upstream_transcript_variant                                                 |
| rs960555627 | intron_variant                                                                                   |
| rs960600659 | intron_variant                                                                                   |
| rs960601416 | intron_variant,genic_upstream_transcript_variant                                                 |
| rs960643054 | intron_variant,genic_downstream_transcript_variant                                               |
| rs960647405 | intron_variant,genic_downstream_transcript_variant                                               |
| rs960665404 | intron_variant,genic_upstream_transcript_variant                                                 |
| rs960695652 | intron_variant                                                                                   |
| rs960734673 | intron_variant                                                                                   |
| rs960739036 | intron_variant,genic_downstream_transcript_variant                                               |
| rs960761852 | intron_variant,genic_upstream_transcript_variant                                                 |
| rs960762932 | intron_variant,genic_upstream_transcript_variant                                                 |
| rs960783016 | intron_variant,genic_upstream_transcript_variant                                                 |
| rs960786149 | intron_variant                                                                                   |
| rs960853613 | intron_variant,genic_upstream_transcript_variant                                                 |
| rs960875934 | intron_variant,genic_upstream_transcript_variant                                                 |
| rs960884219 | intron_variant                                                                                   |
| rs960920696 | intron_variant,genic_upstream_transcript_variant                                                 |
| rs960981516 | intron_variant,genic_upstream_transcript_variant                                                 |
| rs960994325 | intron_variant,genic_downstream_transcript_variant                                               |
| rs961031153 | intron_variant,genic_downstream_transcript_variant                                               |
| rs961048835 | intron_variant,genic_upstream_transcript_variant                                                 |
| rs961090362 | intron_variant,genic_upstream_transcript_variant                                                 |
| rs961093661 | intron_variant,genic_downstream_transcript_variant                                               |
| rs961097886 | intron_variant,genic_upstream_transcript_variant                                                 |
| rs961149186 | intron_variant,genic_downstream_transcript_variant                                               |
| rs961149529 | intron_variant,genic_upstream_transcript_variant                                                 |
| rs961150281 | intron_variant,genic_upstream_transcript_variant                                                 |
| rs961172742 | intron_variant,genic_upstream_transcript_variant                                                 |
| rs961248187 | intron_variant                                                                                   |
| rs961286211 | intron_variant,genic_downstream_transcript_variant                                               |
| rs961324016 | intron_variant,genic_upstream_transcript_variant                                                 |
| rs961373985 | intron_variant,genic_upstream_transcript_variant                                                 |
| rs961399228 | intron_variant,genic_downstream_transcript_variant                                               |
| rs961407562 | intron_variant                                                                                   |
| rs961461768 | intron_variant,genic_downstream_transcript_variant                                               |
| rs961464136 | upstream_transcript_variant,5_prime_UTR_variant,intron_variant,genic_upstream_transcript_variant |
| rs961498929 | intron_variant                                                                                   |
| rs961520938 | intron_variant,genic_upstream_transcript_variant                                                 |
| rs961570762 | intron_variant,genic_upstream_transcript_variant                                                 |
| rs961575767 | intron_variant,genic_downstream_transcript_variant                                               |
| rs961605471 | intron_variant,genic_downstream_transcript_variant                                               |
| rs961608317 | intron_variant                                                                                   |
| rs961651356 | intron_variant                                                                                   |
| rs961655247 | intron_variant,genic_upstream_transcript_variant                                                 |
| rs961659390 | intron_variant,genic_upstream_transcript_variant                                                 |

|             |                                                                                                   |
|-------------|---------------------------------------------------------------------------------------------------|
| rs961666135 | intron_variant                                                                                    |
| rs961687032 | intron_variant                                                                                    |
| rs961687972 | non_coding_transcript_variant,3_prime_UTR_variant,genic_downstream_transcript_variant             |
| rs961703436 | intron_variant                                                                                    |
| rs961705412 | intron_variant,genic_upstream_transcript_variant                                                  |
| rs961721103 | non_coding_transcript_variant,3_prime_UTR_variant,genic_downstream_transcript_variant             |
| rs961723831 | intron_variant,genic_upstream_transcript_variant                                                  |
| rs961734858 | intron_variant                                                                                    |
| rs961778582 | intron_variant                                                                                    |
| rs961794488 | intron_variant,genic_upstream_transcript_variant                                                  |
| rs961820546 | intron_variant,genic_downstream_transcript_variant                                                |
| rs961847040 | intron_variant                                                                                    |
| rs961850779 | intron_variant                                                                                    |
| rs961860641 | intron_variant,genic_downstream_transcript_variant                                                |
| rs961900170 | intron_variant,genic_downstream_transcript_variant                                                |
| rs961913134 | intron_variant                                                                                    |
| rs961917117 | upstream_transcript_variant,intron_variant,genic_upstream_transcript_variant,2KB_upstream_variant |
| rs961925839 | intron_variant,genic_downstream_transcript_variant                                                |
| rs961937622 | intron_variant                                                                                    |
| rs961988580 | intron_variant                                                                                    |
| rs962012523 | intron_variant                                                                                    |
| rs962027324 | intron_variant,genic_upstream_transcript_variant                                                  |
| rs962036419 | intron_variant,genic_upstream_transcript_variant,upstream_transcript_variant,2KB_upstream_variant |
| rs962075222 | intron_variant,genic_upstream_transcript_variant                                                  |
| rs962107253 | intron_variant,upstream_transcript_variant,genic_upstream_transcript_variant                      |
| rs962166816 | intron_variant                                                                                    |
| rs962183175 | intron_variant,genic_upstream_transcript_variant                                                  |
| rs962188753 | intron_variant,genic_downstream_transcript_variant                                                |
| rs962231860 | intron_variant,genic_upstream_transcript_variant                                                  |
| rs962276391 | intron_variant                                                                                    |
| rs962279628 | intron_variant,genic_downstream_transcript_variant                                                |
| rs962300514 | intron_variant,genic_downstream_transcript_variant                                                |
| rs962315738 | intron_variant,genic_upstream_transcript_variant                                                  |
| rs962339536 | intron_variant,upstream_transcript_variant,genic_upstream_transcript_variant                      |
| rs962343831 | intron_variant                                                                                    |
| rs962369975 | intron_variant,genic_upstream_transcript_variant                                                  |
| rs962393881 | intron_variant,genic_upstream_transcript_variant,upstream_transcript_variant,2KB_upstream_variant |
| rs962411186 | intron_variant                                                                                    |
| rs962462996 | intron_variant                                                                                    |
| rs962467155 | intron_variant,genic_upstream_transcript_variant                                                  |
| rs962476637 | intron_variant                                                                                    |
| rs962499004 | intron_variant                                                                                    |
| rs962511525 | intron_variant,genic_upstream_transcript_variant                                                  |
| rs962513988 | intron_variant,genic_upstream_transcript_variant                                                  |
| rs962527664 | intron_variant,genic_upstream_transcript_variant                                                  |
| rs962548379 | intron_variant                                                                                    |
| rs962571275 | intron_variant,genic_downstream_transcript_variant                                                |
| rs962587300 | intron_variant,genic_upstream_transcript_variant                                                  |
| rs962629185 | intron_variant,genic_downstream_transcript_variant                                                |
| rs962641686 | non_coding_transcript_variant,synonymous_variant,coding_sequence_variant                          |
| rs962682869 | intron_variant,genic_upstream_transcript_variant                                                  |
| rs962705201 | intron_variant                                                                                    |
| rs962711920 | intron_variant                                                                                    |
| rs962736958 | intron_variant,genic_upstream_transcript_variant                                                  |
| rs962850351 | intron_variant                                                                                    |
| rs962854252 | intron_variant                                                                                    |
| rs962872462 | intron_variant,genic_downstream_transcript_variant                                                |
| rs962958150 | intron_variant,genic_upstream_transcript_variant                                                  |
| rs962964191 | intron_variant                                                                                    |
| rs963028788 | intron_variant,genic_upstream_transcript_variant                                                  |
| rs963037610 | intron_variant,genic_upstream_transcript_variant                                                  |
| rs963119814 | intron_variant                                                                                    |
| rs963125161 | intron_variant                                                                                    |
| rs963192588 | intron_variant                                                                                    |
| rs963251827 | intron_variant,genic_upstream_transcript_variant                                                  |
| rs963266550 | intron_variant,genic_upstream_transcript_variant                                                  |
| rs963268857 | intron_variant,genic_upstream_transcript_variant                                                  |
| rs963338663 | intron_variant,genic_upstream_transcript_variant                                                  |
| rs963359406 | intron_variant                                                                                    |
| rs963430823 | intron_variant                                                                                    |
| rs963477772 | intron_variant,genic_downstream_transcript_variant                                                |
| rs963496991 | non_coding_transcript_variant,3_prime_UTR_variant,genic_downstream_transcript_variant             |
| rs963525945 | intron_variant,genic_upstream_transcript_variant                                                  |
| rs963547880 | intron_variant,genic_upstream_transcript_variant                                                  |

|             |                                                                                                                                             |
|-------------|---------------------------------------------------------------------------------------------------------------------------------------------|
| rs963595693 | intron_variant,genic_downstream_transcript_variant                                                                                          |
| rs963605171 | intron_variant,genic_downstream_transcript_variant                                                                                          |
| rs963627764 | intron_variant,genic_downstream_transcript_variant                                                                                          |
| rs963655789 | intron_variant                                                                                                                              |
| rs963663507 | 5_prime_UTR_variant,non_coding_transcript_variant,missense_variant,coding_sequence_variant,intron_variant,genic_upstream_transcript_variant |
| rs963695930 | intron_variant                                                                                                                              |
| rs963733322 | intron_variant,genic_upstream_transcript_variant                                                                                            |
| rs963787409 | intron_variant                                                                                                                              |
| rs963793863 | intron_variant,genic_upstream_transcript_variant                                                                                            |
| rs963809486 | intron_variant,genic_downstream_transcript_variant                                                                                          |
| rs963845321 | intron_variant,genic_downstream_transcript_variant                                                                                          |
| rs963858287 | intron_variant                                                                                                                              |
| rs963906537 | intron_variant,genic_upstream_transcript_variant                                                                                            |
| rs963936254 | intron_variant,genic_upstream_transcript_variant                                                                                            |
| rs963943694 | intron_variant                                                                                                                              |
| rs963948948 | intron_variant                                                                                                                              |
| rs963954054 | intron_variant                                                                                                                              |
| rs963985352 | intron_variant                                                                                                                              |
| rs964037056 | intron_variant                                                                                                                              |
| rs964071324 | intron_variant,genic_upstream_transcript_variant                                                                                            |
| rs964090669 | intron_variant                                                                                                                              |
| rs964131832 | intron_variant,genic_downstream_transcript_variant                                                                                          |
| rs964220306 | intron_variant,genic_upstream_transcript_variant                                                                                            |
| rs964229260 | intron_variant                                                                                                                              |
| rs964246724 | intron_variant,genic_upstream_transcript_variant                                                                                            |
| rs964266757 | intron_variant                                                                                                                              |
| rs964291044 | intron_variant                                                                                                                              |
| rs964307818 | intron_variant,genic_upstream_transcript_variant                                                                                            |
| rs964320180 | intron_variant                                                                                                                              |
| rs964356368 | non_coding_transcript_variant,missense_variant,coding_sequence_variant,intron_variant,genic_upstream_transcript_variant                     |
| rs964376121 | intron_variant,genic_downstream_transcript_variant                                                                                          |
| rs964396014 | non_coding_transcript_variant,3_prime_UTR_variant,genic_downstream_transcript_variant                                                       |
| rs964410497 | intron_variant,genic_upstream_transcript_variant                                                                                            |
| rs964422803 | intron_variant                                                                                                                              |
| rs964500408 | intron_variant,genic_upstream_transcript_variant                                                                                            |
| rs964576679 | intron_variant                                                                                                                              |
| rs964592234 | missense_variant,non_coding_transcript_variant,coding_sequence_variant                                                                      |
| rs964679589 | intron_variant,genic_upstream_transcript_variant                                                                                            |
| rs964691004 | intron_variant,genic_upstream_transcript_variant                                                                                            |
| rs964721144 | intron_variant,genic_upstream_transcript_variant                                                                                            |
| rs964750194 | intron_variant,genic_downstream_transcript_variant                                                                                          |
| rs964752167 | intron_variant,genic_upstream_transcript_variant                                                                                            |
| rs964780861 | intron_variant,genic_downstream_transcript_variant                                                                                          |
| rs964783870 | intron_variant,genic_downstream_transcript_variant                                                                                          |
| rs964784290 | intron_variant,genic_upstream_transcript_variant                                                                                            |
| rs964829546 | intron_variant,genic_upstream_transcript_variant                                                                                            |
| rs964894130 | intron_variant                                                                                                                              |
| rs964902579 | intron_variant,genic_upstream_transcript_variant                                                                                            |
| rs964908511 | intron_variant,genic_upstream_transcript_variant                                                                                            |
| rs964911687 | intron_variant,genic_upstream_transcript_variant                                                                                            |
| rs964973693 | intron_variant,genic_upstream_transcript_variant                                                                                            |
| rs964994696 | intron_variant,genic_downstream_transcript_variant                                                                                          |
| rs965026667 | non_coding_transcript_variant,3_prime_UTR_variant,genic_downstream_transcript_variant                                                       |
| rs965030027 | intron_variant,genic_upstream_transcript_variant                                                                                            |
| rs965036276 | intron_variant,genic_downstream_transcript_variant                                                                                          |
| rs965052772 | intron_variant,genic_upstream_transcript_variant                                                                                            |
| rs965065925 | intron_variant,genic_downstream_transcript_variant                                                                                          |
| rs965066206 | intron_variant                                                                                                                              |
| rs965079629 | intron_variant,genic_upstream_transcript_variant                                                                                            |
| rs965087858 | intron_variant                                                                                                                              |
| rs965123564 | intron_variant                                                                                                                              |
| rs965198848 | intron_variant                                                                                                                              |
| rs965206394 | intron_variant                                                                                                                              |
| rs965212785 | intron_variant,genic_upstream_transcript_variant                                                                                            |
| rs965310303 | intron_variant                                                                                                                              |
| rs965356945 | intron_variant,genic_upstream_transcript_variant                                                                                            |
| rs965365559 | intron_variant,genic_upstream_transcript_variant                                                                                            |
| rs965377383 | intron_variant                                                                                                                              |
| rs965428008 | intron_variant                                                                                                                              |
| rs965450990 | intron_variant                                                                                                                              |
| rs965455003 | intron_variant,genic_upstream_transcript_variant                                                                                            |
| rs965471260 | intron_variant,genic_downstream_transcript_variant                                                                                          |
| rs965514340 | intron_variant,genic_upstream_transcript_variant                                                                                            |
| rs965519617 | intron_variant,genic_upstream_transcript_variant                                                                                            |

|             |                                                                                                   |
|-------------|---------------------------------------------------------------------------------------------------|
| rs965586185 | intron_variant,genic_upstream_transcript_variant                                                  |
| rs965589390 | intron_variant,genic_upstream_transcript_variant                                                  |
| rs965620890 | intron_variant,downstream_transcript_variant,genic_downstream_transcript_variant                  |
| rs965646302 | intron_variant,genic_downstream_transcript_variant                                                |
| rs965677344 | intron_variant,genic_downstream_transcript_variant                                                |
| rs965725998 | intron_variant,genic_upstream_transcript_variant                                                  |
| rs965755299 | genic_downstream_transcript_variant,intron_variant                                                |
| rs965776877 | genic_upstream_transcript_variant,intron_variant                                                  |
| rs965788932 | intron_variant                                                                                    |
| rs965804758 | genic_upstream_transcript_variant,intron_variant                                                  |
| rs965842534 | genic_upstream_transcript_variant,intron_variant                                                  |
| rs965865729 | genic_downstream_transcript_variant,intron_variant                                                |
| rs965876208 | genic_upstream_transcript_variant,intron_variant                                                  |
| rs965898767 | genic_upstream_transcript_variant,intron_variant                                                  |
| rs965907913 | genic_upstream_transcript_variant,intron_variant                                                  |
| rs965917698 | genic_upstream_transcript_variant,intron_variant                                                  |
| rs965919829 | genic_upstream_transcript_variant,intron_variant                                                  |
| rs965935592 | genic_upstream_transcript_variant,intron_variant                                                  |
| rs965967242 | intron_variant                                                                                    |
| rs965978359 | intron_variant                                                                                    |
| rs965984717 | genic_downstream_transcript_variant,downstream_transcript_variant,intron_variant                  |
| rs965992664 | intron_variant                                                                                    |
| rs966090421 | genic_upstream_transcript_variant,intron_variant                                                  |
| rs966090566 | intron_variant                                                                                    |
| rs966140372 | genic_upstream_transcript_variant,intron_variant                                                  |
| rs966140717 | intron_variant                                                                                    |
| rs966155550 | genic_upstream_transcript_variant,intron_variant                                                  |
| rs966170540 | genic_downstream_transcript_variant,intron_variant                                                |
| rs966198893 | upstream_transcript_variant,2KB_upstream_variant,genic_upstream_transcript_variant,intron_variant |
| rs966204599 | genic_downstream_transcript_variant,intron_variant                                                |
| rs966210004 | genic_upstream_transcript_variant,intron_variant                                                  |
| rs966216953 | intron_variant                                                                                    |
| rs966228823 | genic_upstream_transcript_variant,intron_variant                                                  |
| rs966272521 | intron_variant                                                                                    |
| rs966283224 | genic_upstream_transcript_variant,intron_variant                                                  |
| rs966315347 | genic_upstream_transcript_variant,intron_variant                                                  |
| rs966328932 | intron_variant                                                                                    |
| rs966336201 | genic_downstream_transcript_variant,intron_variant                                                |
| rs966366668 | intron_variant                                                                                    |
| rs966382443 | intron_variant                                                                                    |
| rs966382822 | genic_downstream_transcript_variant,intron_variant                                                |
| rs966396190 | genic_upstream_transcript_variant,intron_variant                                                  |
| rs966413887 | genic_downstream_transcript_variant,intron_variant                                                |
| rs966427299 | genic_upstream_transcript_variant,intron_variant                                                  |
| rs966452795 | 500B_downstream_variant,downstream_transcript_variant                                             |
| rs966496613 | genic_upstream_transcript_variant,intron_variant                                                  |
| rs966533708 | genic_downstream_transcript_variant,intron_variant                                                |
| rs966564308 | intron_variant                                                                                    |
| rs966632916 | genic_downstream_transcript_variant,intron_variant                                                |
| rs966643140 | intron_variant                                                                                    |
| rs966674559 | genic_upstream_transcript_variant,intron_variant                                                  |
| rs966687202 | genic_downstream_transcript_variant,intron_variant                                                |
| rs966706550 | genic_upstream_transcript_variant,intron_variant                                                  |
| rs966707038 | genic_upstream_transcript_variant,intron_variant                                                  |
| rs966717668 | genic_downstream_transcript_variant,intron_variant                                                |
| rs966759299 | intron_variant                                                                                    |
| rs966784756 | intron_variant                                                                                    |
| rs966789607 | intron_variant                                                                                    |
| rs966805394 | genic_upstream_transcript_variant,intron_variant                                                  |
| rs966871873 | intron_variant                                                                                    |
| rs966888472 | genic_upstream_transcript_variant,intron_variant                                                  |
| rs966889790 | genic_upstream_transcript_variant,intron_variant                                                  |
| rs966890564 | genic_upstream_transcript_variant,intron_variant                                                  |
| rs966896581 | genic_upstream_transcript_variant,intron_variant                                                  |
| rs966927509 | intron_variant                                                                                    |
| rs966944416 | genic_upstream_transcript_variant,intron_variant                                                  |
| rs967049060 | intron_variant                                                                                    |
| rs967060702 | intron_variant                                                                                    |
| rs967066235 | genic_upstream_transcript_variant,intron_variant                                                  |
| rs967069466 | intron_variant                                                                                    |
| rs967078214 | genic_upstream_transcript_variant,intron_variant                                                  |
| rs967125763 | genic_upstream_transcript_variant,intron_variant                                                  |
| rs967134117 | intron_variant                                                                                    |
| rs967163037 | intron_variant                                                                                    |

|             |                                                                                                    |
|-------------|----------------------------------------------------------------------------------------------------|
| rs967179088 | intron_variant                                                                                     |
| rs967204791 | intron_variant                                                                                     |
| rs967224872 | genic_upstream_transcript_variant,intron_variant                                                   |
| rs967234663 | genic_upstream_transcript_variant,intron_variant                                                   |
| rs967242812 | genic_upstream_transcript_variant,intron_variant                                                   |
| rs967243840 | upstream_transcript_variant,2KB_upstream_variant,genic_upstream_transcript_variant,intron_variant  |
| rs967276114 | genic_upstream_transcript_variant,intron_variant                                                   |
| rs967283463 | intron_variant                                                                                     |
| rs967319288 | genic_upstream_transcript_variant,intron_variant                                                   |
| rs967341433 | genic_upstream_transcript_variant,intron_variant                                                   |
| rs967357267 | genic_upstream_transcript_variant,intron_variant                                                   |
| rs967360574 | genic_downstream_transcript_variant,intron_variant                                                 |
| rs967384716 | genic_upstream_transcript_variant,intron_variant                                                   |
| rs967427260 | genic_upstream_transcript_variant,intron_variant                                                   |
| rs967455974 | genic_downstream_transcript_variant,intron_variant                                                 |
| rs967479578 | genic_upstream_transcript_variant,intron_variant                                                   |
| rs967482888 | genic_downstream_transcript_variant,intron_variant                                                 |
| rs967520595 | upstream_transcript_variant,2KB_upstream_variant,genic_upstream_transcript_variant,intron_variant  |
| rs967526627 | genic_upstream_transcript_variant,intron_variant                                                   |
| rs967602884 | genic_downstream_transcript_variant,intron_variant                                                 |
| rs967642703 | intron_variant                                                                                     |
| rs967659230 | intron_variant                                                                                     |
| rs967690264 | genic_downstream_transcript_variant,intron_variant                                                 |
| rs967693286 | genic_upstream_transcript_variant,intron_variant                                                   |
| rs967712593 | genic_upstream_transcript_variant,intron_variant                                                   |
| rs967728187 | genic_downstream_transcript_variant,intron_variant                                                 |
| rs967738968 | genic_upstream_transcript_variant,intron_variant                                                   |
| rs967762924 | genic_downstream_transcript_variant,intron_variant                                                 |
| rs967775142 | genic_downstream_transcript_variant,intron_variant                                                 |
| rs967810838 | genic_upstream_transcript_variant,intron_variant                                                   |
| rs967835858 | intron_variant                                                                                     |
| rs967845001 | genic_upstream_transcript_variant,intron_variant                                                   |
| rs967859019 | intron_variant                                                                                     |
| rs967895310 | intron_variant                                                                                     |
| rs967896963 | genic_downstream_transcript_variant,intron_variant                                                 |
| rs967922773 | intron_variant                                                                                     |
| rs967934975 | intron_variant                                                                                     |
| rs967945824 | genic_upstream_transcript_variant,intron_variant                                                   |
| rs967968395 | genic_upstream_transcript_variant,intron_variant                                                   |
| rs968028473 | genic_upstream_transcript_variant,intron_variant                                                   |
| rs968034125 | intron_variant                                                                                     |
| rs968039946 | intron_variant                                                                                     |
| rs968072005 | genic_upstream_transcript_variant,intron_variant                                                   |
| rs968079371 | intron_variant                                                                                     |
| rs968098622 | genic_upstream_transcript_variant,intron_variant                                                   |
| rs968122219 | genic_downstream_transcript_variant,intron_variant                                                 |
| rs968142708 | intron_variant                                                                                     |
| rs968168784 | genic_upstream_transcript_variant,intron_variant                                                   |
| rs968177856 | intron_variant                                                                                     |
| rs968187976 | genic_upstream_transcript_variant,intron_variant                                                   |
| rs968292360 | intron_variant                                                                                     |
| rs968340669 | genic_upstream_transcript_variant,intron_variant                                                   |
| rs968342603 | genic_downstream_transcript_variant,intron_variant                                                 |
| rs968364867 | genic_downstream_transcript_variant,intron_variant                                                 |
| rs968368048 | intron_variant                                                                                     |
| rs968375515 | genic_downstream_transcript_variant,intron_variant                                                 |
| rs968389438 | genic_downstream_transcript_variant,intron_variant                                                 |
| rs968414429 | genic_downstream_transcript_variant,intron_variant                                                 |
| rs968478091 | genic_upstream_transcript_variant,intron_variant                                                   |
| rs968508484 | intron_variant                                                                                     |
| rs968512516 | intron_variant                                                                                     |
| rs968551537 | intron_variant                                                                                     |
| rs968580306 | intron_variant                                                                                     |
| rs968626758 | intron_variant                                                                                     |
| rs968631069 | genic_upstream_transcript_variant,intron_variant                                                   |
| rs968636277 | genic_downstream_transcript_variant,intron_variant                                                 |
| rs968669313 | genic_upstream_transcript_variant,2KB_upstream_variant,upstream_transcript_variant,intron_variant  |
| rs968716357 | intron_variant                                                                                     |
| rs968727568 | genic_upstream_transcript_variant,non_coding_transcript_variant,5_prime_UTR_variant,intron_variant |
| rs968736147 | intron_variant                                                                                     |
| rs968750041 | genic_upstream_transcript_variant,intron_variant                                                   |
| rs968813177 | genic_upstream_transcript_variant,intron_variant                                                   |
| rs968878413 | genic_upstream_transcript_variant,intron_variant                                                   |
| rs968899321 | upstream_transcript_variant,genic_upstream_transcript_variant,intron_variant                       |

|             |                                                                                                            |
|-------------|------------------------------------------------------------------------------------------------------------|
| rs968901060 | upstream_transcript_variant,genic_upstream_transcript_variant,intron_variant                               |
| rs968958135 | genic_upstream_transcript_variant,upstream_transcript_variant,5_prime_UTR_variant,intron_variant           |
| rs969022420 | genic_downstream_transcript_variant,intron_variant                                                         |
| rs969024933 | upstream_transcript_variant,genic_upstream_transcript_variant,intron_variant                               |
| rs969032915 | genic_upstream_transcript_variant,intron_variant                                                           |
| rs969034216 | genic_upstream_transcript_variant,intron_variant                                                           |
| rs969066386 | genic_upstream_transcript_variant,intron_variant                                                           |
| rs969085066 | genic_upstream_transcript_variant,intron_variant                                                           |
| rs969175681 | intron_variant                                                                                             |
| rs969183806 | intron_variant                                                                                             |
| rs969188845 | intron_variant                                                                                             |
| rs969218735 | intron_variant                                                                                             |
| rs969235431 | genic_downstream_transcript_variant,intron_variant                                                         |
| rs969253537 | genic_upstream_transcript_variant,intron_variant                                                           |
| rs969294088 | intron_variant                                                                                             |
| rs969334735 | genic_upstream_transcript_variant,intron_variant                                                           |
| rs969365355 | genic_downstream_transcript_variant,intron_variant                                                         |
| rs969394405 | genic_upstream_transcript_variant,intron_variant                                                           |
| rs969405192 | intron_variant                                                                                             |
| rs969409897 | genic_upstream_transcript_variant,intron_variant                                                           |
| rs969417141 | genic_downstream_transcript_variant,intron_variant                                                         |
| rs969419688 | upstream_transcript_variant,genic_upstream_transcript_variant,intron_variant                               |
| rs969430279 | genic_upstream_transcript_variant,intron_variant                                                           |
| rs969445321 | intron_variant                                                                                             |
| rs969455022 | intron_variant                                                                                             |
| rs969496997 | intron_variant                                                                                             |
| rs969509895 | genic_upstream_transcript_variant,intron_variant                                                           |
| rs969532034 | genic_upstream_transcript_variant,2KB_upstream_variant,upstream_transcript_variant,intron_variant          |
| rs969543202 | genic_upstream_transcript_variant,intron_variant                                                           |
| rs969557020 | genic_upstream_transcript_variant,intron_variant                                                           |
| rs969582246 | genic_upstream_transcript_variant,intron_variant                                                           |
| rs969621405 | genic_upstream_transcript_variant,intron_variant                                                           |
| rs969637390 | genic_upstream_transcript_variant,intron_variant                                                           |
| rs969646436 | genic_downstream_transcript_variant,intron_variant                                                         |
| rs969646477 | genic_downstream_transcript_variant,intron_variant                                                         |
| rs969685999 | intron_variant                                                                                             |
| rs969769228 | genic_upstream_transcript_variant,intron_variant                                                           |
| rs969793803 | genic_upstream_transcript_variant,intron_variant                                                           |
| rs969864705 | intron_variant                                                                                             |
| rs969865175 | intron_variant                                                                                             |
| rs969872681 | genic_upstream_transcript_variant,intron_variant                                                           |
| rs969909698 | genic_downstream_transcript_variant,intron_variant                                                         |
| rs969938880 | intron_variant                                                                                             |
| rs969956432 | genic_downstream_transcript_variant,intron_variant                                                         |
| rs969972446 | genic_upstream_transcript_variant,intron_variant                                                           |
| rs969980154 | genic_downstream_transcript_variant,intron_variant                                                         |
| rs969989466 | intron_variant                                                                                             |
| rs970042969 | genic_upstream_transcript_variant,intron_variant                                                           |
| rs970101097 | intron_variant                                                                                             |
| rs970101127 | intron_variant                                                                                             |
| rs970153847 | intron_variant                                                                                             |
| rs970200705 | genic_upstream_transcript_variant,intron_variant                                                           |
| rs970206545 | genic_downstream_transcript_variant,non_coding_transcript_variant,missense_variant,coding_sequence_variant |
| rs970229176 | intron_variant                                                                                             |
| rs970241068 | genic_upstream_transcript_variant,intron_variant                                                           |
| rs970277664 | genic_upstream_transcript_variant,intron_variant                                                           |
| rs970279084 | intron_variant                                                                                             |
| rs970280415 | genic_downstream_transcript_variant,intron_variant                                                         |
| rs970310147 | genic_downstream_transcript_variant,intron_variant                                                         |
| rs970337794 | genic_upstream_transcript_variant,intron_variant                                                           |
| rs970338725 | genic_upstream_transcript_variant,intron_variant                                                           |
| rs970371015 | intron_variant                                                                                             |
| rs970402078 | genic_upstream_transcript_variant,2KB_upstream_variant,upstream_transcript_variant,intron_variant          |
| rs970512328 | intron_variant                                                                                             |
| rs970607296 | genic_downstream_transcript_variant,intron_variant                                                         |
| rs970615851 | intron_variant                                                                                             |
| rs970621616 | genic_downstream_transcript_variant,intron_variant                                                         |
| rs970621858 | genic_upstream_transcript_variant,intron_variant                                                           |
| rs970643807 | genic_upstream_transcript_variant,intron_variant                                                           |
| rs970652902 | genic_downstream_transcript_variant,intron_variant                                                         |
| rs970663779 | genic_upstream_transcript_variant,intron_variant                                                           |
| rs970686059 | genic_downstream_transcript_variant,intron_variant                                                         |
| rs970708679 | genic_upstream_transcript_variant,intron_variant                                                           |
| rs970711078 | genic_upstream_transcript_variant,intron_variant                                                           |

|             |                                                                                                                         |
|-------------|-------------------------------------------------------------------------------------------------------------------------|
| rs970759579 | genic_downstream_transcript_variant,intron_variant                                                                      |
| rs970767995 | intron_variant                                                                                                          |
| rs970815265 | intron_variant                                                                                                          |
| rs970860543 | intron_variant                                                                                                          |
| rs970867744 | genic_upstream_transcript_variant,intron_variant                                                                        |
| rs970873399 | genic_downstream_transcript_variant,intron_variant                                                                      |
| rs970898566 | genic_upstream_transcript_variant,intron_variant                                                                        |
| rs970953696 | intron_variant                                                                                                          |
| rs970985685 | genic_downstream_transcript_variant,intron_variant                                                                      |
| rs970989724 | genic_upstream_transcript_variant,intron_variant                                                                        |
| rs970990427 | genic_downstream_transcript_variant,intron_variant                                                                      |
| rs970991062 | genic_upstream_transcript_variant,intron_variant                                                                        |
| rs971044366 | intron_variant                                                                                                          |
| rs971046044 | genic_upstream_transcript_variant,intron_variant                                                                        |
| rs971067673 | intron_variant                                                                                                          |
| rs971163612 | intron_variant                                                                                                          |
| rs971173000 | genic_downstream_transcript_variant,intron_variant                                                                      |
| rs971197453 | intron_variant                                                                                                          |
| rs971266153 | genic_downstream_transcript_variant,non_coding_transcript_variant,3_prime_UTR_variant                                   |
| rs971273713 | genic_upstream_transcript_variant,intron_variant                                                                        |
| rs971276001 | genic_upstream_transcript_variant,intron_variant                                                                        |
| rs971286467 | 500B_downstream_variant,downstream_transcript_variant                                                                   |
| rs971304753 | genic_upstream_transcript_variant,intron_variant                                                                        |
| rs971323607 | intron_variant                                                                                                          |
| rs971356949 | genic_downstream_transcript_variant,intron_variant                                                                      |
| rs971362676 | coding_sequence_variant,non_coding_transcript_variant,genic_upstream_transcript_variant,missense_variant,intron_variant |
| rs971376334 | intron_variant                                                                                                          |
| rs971424003 | intron_variant                                                                                                          |
| rs971438384 | intron_variant                                                                                                          |
| rs971457482 | intron_variant                                                                                                          |
| rs971462607 | genic_downstream_transcript_variant,intron_variant                                                                      |
| rs971462742 | intron_variant                                                                                                          |
| rs971530860 | intron_variant                                                                                                          |
| rs971563069 | non_coding_transcript_variant,missense_variant,coding_sequence_variant                                                  |
| rs971585559 | genic_upstream_transcript_variant,intron_variant                                                                        |
| rs971645196 | genic_upstream_transcript_variant,intron_variant                                                                        |
| rs971658126 | genic_downstream_transcript_variant,intron_variant                                                                      |
| rs971684124 | genic_upstream_transcript_variant,intron_variant                                                                        |
| rs971749562 | genic_upstream_transcript_variant,intron_variant                                                                        |
| rs971759152 | intron_variant                                                                                                          |
| rs971766951 | genic_upstream_transcript_variant,intron_variant                                                                        |
| rs971806579 | genic_upstream_transcript_variant,intron_variant                                                                        |
| rs971853548 | genic_upstream_transcript_variant,intron_variant                                                                        |
| rs971865008 | genic_upstream_transcript_variant,intron_variant                                                                        |
| rs971875449 | genic_downstream_transcript_variant,downstream_transcript_variant,intron_variant                                        |
| rs971896496 | genic_downstream_transcript_variant,intron_variant                                                                      |
| rs971922030 | genic_upstream_transcript_variant,intron_variant                                                                        |
| rs971951665 | genic_upstream_transcript_variant,intron_variant                                                                        |
| rs971955089 | genic_upstream_transcript_variant,intron_variant                                                                        |
| rs976726671 | genic_upstream_transcript_variant,2KB_upstream_variant,upstream_transcript_variant,intron_variant                       |
| rs976784816 | 5_prime_UTR_variant,intron_variant                                                                                      |
| rs976846972 | intron_variant                                                                                                          |
| rs976867068 | genic_downstream_transcript_variant,intron_variant                                                                      |
| rs976895506 | intron_variant                                                                                                          |
| rs976903215 | intron_variant                                                                                                          |
| rs976929352 | genic_upstream_transcript_variant,intron_variant                                                                        |
| rs976957397 | intron_variant                                                                                                          |
| rs976963520 | genic_downstream_transcript_variant,intron_variant                                                                      |
| rs976994252 | intron_variant                                                                                                          |
| rs977000663 | intron_variant                                                                                                          |
| rs977031248 | intron_variant                                                                                                          |
| rs977031550 | genic_upstream_transcript_variant,2KB_upstream_variant,upstream_transcript_variant,intron_variant                       |
| rs977048779 | genic_downstream_transcript_variant,intron_variant                                                                      |
| rs977054798 | upstream_transcript_variant,2KB_upstream_variant,genic_upstream_transcript_variant,intron_variant                       |
| rs977060393 | genic_downstream_transcript_variant,downstream_transcript_variant,intron_variant                                        |
| rs977075258 | genic_upstream_transcript_variant,intron_variant                                                                        |
| rs977080204 | intron_variant                                                                                                          |
| rs977129833 | genic_upstream_transcript_variant,intron_variant                                                                        |
| rs977138902 | genic_downstream_transcript_variant,intron_variant                                                                      |
| rs977151376 | genic_upstream_transcript_variant,intron_variant                                                                        |
| rs977214022 | genic_upstream_transcript_variant,intron_variant                                                                        |
| rs977239438 | genic_downstream_transcript_variant,intron_variant                                                                      |
| rs977246967 | intron_variant                                                                                                          |
| rs977247684 | genic_upstream_transcript_variant,intron_variant                                                                        |

|             |                                                                                                   |
|-------------|---------------------------------------------------------------------------------------------------|
| rs977252320 | intron_variant                                                                                    |
| rs977274965 | genic_upstream_transcript_variant,intron_variant                                                  |
| rs977275643 | upstream_transcript_variant,2KB_upstream_variant,genic_upstream_transcript_variant,intron_variant |
| rs977279381 | genic_upstream_transcript_variant,intron_variant                                                  |
| rs977293915 | genic_upstream_transcript_variant,intron_variant                                                  |
| rs977300734 | genic_downstream_transcript_variant,downstream_transcript_variant,intron_variant                  |
| rs977323028 | intron_variant                                                                                    |
| rs977335240 | genic_upstream_transcript_variant,intron_variant                                                  |
| rs977360679 | genic_upstream_transcript_variant,intron_variant                                                  |
| rs977416323 | intron_variant                                                                                    |
| rs977476360 | intron_variant                                                                                    |
| rs977485458 | genic_downstream_transcript_variant,intron_variant                                                |
| rs977507141 | intron_variant                                                                                    |
| rs977569495 | intron_variant                                                                                    |
| rs977574164 | genic_upstream_transcript_variant,intron_variant                                                  |
| rs977616151 | genic_downstream_transcript_variant,intron_variant                                                |
| rs977639063 | genic_downstream_transcript_variant,intron_variant                                                |
| rs977648531 | genic_downstream_transcript_variant,intron_variant                                                |
| rs977659511 | genic_upstream_transcript_variant,intron_variant                                                  |
| rs977664470 | intron_variant                                                                                    |
| rs977671689 | genic_downstream_transcript_variant,intron_variant                                                |
| rs977678396 | intron_variant                                                                                    |
| rs977760267 | intron_variant                                                                                    |
| rs977761497 | genic_upstream_transcript_variant,intron_variant                                                  |
| rs977815199 | intron_variant                                                                                    |
| rs977850836 | intron_variant                                                                                    |
| rs977889410 | genic_upstream_transcript_variant,intron_variant                                                  |
| rs977892325 | genic_downstream_transcript_variant,intron_variant                                                |
| rs977909337 | genic_upstream_transcript_variant,intron_variant                                                  |
| rs977928622 | genic_upstream_transcript_variant,intron_variant                                                  |
| rs977934257 | intron_variant                                                                                    |
| rs978091867 | intron_variant                                                                                    |
| rs978097598 | genic_downstream_transcript_variant,intron_variant                                                |
| rs978214925 | genic_upstream_transcript_variant,intron_variant                                                  |
| rs978233070 | intron_variant                                                                                    |
| rs978305178 | genic_downstream_transcript_variant,intron_variant                                                |
| rs978328375 | genic_upstream_transcript_variant,intron_variant                                                  |
| rs978351908 | intron_variant                                                                                    |
| rs978356552 | intron_variant                                                                                    |
| rs978364235 | genic_upstream_transcript_variant,intron_variant                                                  |
| rs978365089 | intron_variant                                                                                    |
| rs978388325 | intron_variant                                                                                    |
| rs978393558 | genic_upstream_transcript_variant,intron_variant                                                  |
| rs978415600 | intron_variant                                                                                    |
| rs978454207 | genic_upstream_transcript_variant,intron_variant                                                  |
| rs978477015 | intron_variant                                                                                    |
| rs978506758 | genic_upstream_transcript_variant,upstream_transcript_variant,intron_variant                      |
| rs978524232 | genic_upstream_transcript_variant,intron_variant                                                  |
| rs978565323 | intron_variant                                                                                    |
| rs978581375 | genic_upstream_transcript_variant,intron_variant                                                  |
| rs978585660 | genic_upstream_transcript_variant,intron_variant                                                  |
| rs978604201 | genic_upstream_transcript_variant,intron_variant                                                  |
| rs978606456 | intron_variant                                                                                    |
| rs978615276 | genic_upstream_transcript_variant,intron_variant                                                  |
| rs978661931 | intron_variant                                                                                    |
| rs978696269 | genic_upstream_transcript_variant,intron_variant                                                  |
| rs978720790 | intron_variant                                                                                    |
| rs978768802 | intron_variant                                                                                    |
| rs978802718 | intron_variant                                                                                    |
| rs978843023 | intron_variant                                                                                    |
| rs978853765 | intron_variant                                                                                    |
| rs978921032 | intron_variant                                                                                    |
| rs978951351 | genic_upstream_transcript_variant,upstream_transcript_variant,5_prime_UTR_variant,intron_variant  |
| rs979008288 | genic_upstream_transcript_variant,intron_variant                                                  |
| rs979016496 | intron_variant                                                                                    |
| rs979023618 | intron_variant                                                                                    |
| rs979116240 | genic_upstream_transcript_variant,intron_variant                                                  |
| rs979130768 | genic_downstream_transcript_variant,intron_variant                                                |
| rs979143316 | genic_upstream_transcript_variant,intron_variant                                                  |
| rs979154714 | genic_upstream_transcript_variant,intron_variant                                                  |
| rs979180275 | intron_variant                                                                                    |
| rs979184482 | intron_variant                                                                                    |
| rs979209403 | genic_upstream_transcript_variant,intron_variant                                                  |
| rs979237333 | genic_upstream_transcript_variant,intron_variant                                                  |

|             |                                                                                                    |
|-------------|----------------------------------------------------------------------------------------------------|
| rs979276486 | genic_upstream_transcript_variant,intron_variant                                                   |
| rs979278536 | genic_upstream_transcript_variant,intron_variant                                                   |
| rs979297260 | genic_upstream_transcript_variant,intron_variant                                                   |
| rs979310895 | intron_variant                                                                                     |
| rs979315998 | genic_upstream_transcript_variant,intron_variant                                                   |
| rs979325888 | genic_upstream_transcript_variant,intron_variant                                                   |
| rs979363298 | intron_variant                                                                                     |
| rs979387297 | intron_variant                                                                                     |
| rs979399728 | intron_variant                                                                                     |
| rs979477645 | genic_downstream_transcript_variant,intron_variant                                                 |
| rs979575234 | genic_downstream_transcript_variant,intron_variant                                                 |
| rs979576435 | genic_upstream_transcript_variant,intron_variant                                                   |
| rs979621541 | intron_variant                                                                                     |
| rs979650542 | genic_upstream_transcript_variant,intron_variant                                                   |
| rs979665140 | intron_variant                                                                                     |
| rs979729056 | genic_upstream_transcript_variant,upstream_transcript_variant,intron_variant                       |
| rs979740993 | intron_variant                                                                                     |
| rs979776687 | genic_upstream_transcript_variant,intron_variant                                                   |
| rs979784314 | 5_prime_UTR_variant,intron_variant                                                                 |
| rs979785375 | genic_upstream_transcript_variant,intron_variant                                                   |
| rs979804757 | genic_upstream_transcript_variant,intron_variant                                                   |
| rs979808981 | genic_upstream_transcript_variant,non_coding_transcript_variant,5_prime_UTR_variant,intron_variant |
| rs979809621 | genic_upstream_transcript_variant,intron_variant                                                   |
| rs979851863 | intron_variant                                                                                     |
| rs979858317 | intron_variant                                                                                     |
| rs979863389 | genic_downstream_transcript_variant,intron_variant                                                 |
| rs979897217 | genic_upstream_transcript_variant,intron_variant                                                   |
| rs979905219 | genic_downstream_transcript_variant,intron_variant                                                 |
| rs979932580 | intron_variant                                                                                     |
| rs979939236 | intron_variant                                                                                     |
| rs979957551 | genic_downstream_transcript_variant,intron_variant                                                 |
| rs979969441 | genic_upstream_transcript_variant,intron_variant                                                   |
| rs979973046 | intron_variant                                                                                     |
| rs979998267 | genic_downstream_transcript_variant,intron_variant                                                 |
| rs980048758 | genic_downstream_transcript_variant,intron_variant                                                 |
| rs980049383 | genic_upstream_transcript_variant,intron_variant                                                   |
| rs980057274 | genic_upstream_transcript_variant,intron_variant                                                   |
| rs980072343 | genic_downstream_transcript_variant,intron_variant                                                 |
| rs980078114 | intron_variant                                                                                     |
| rs980129692 | intron_variant                                                                                     |
| rs980154011 | intron_variant                                                                                     |
| rs980201638 | intron_variant                                                                                     |
| rs980202629 | intron_variant                                                                                     |
| rs980206044 | intron_variant                                                                                     |
| rs980208831 | genic_upstream_transcript_variant,intron_variant                                                   |
| rs980232820 | genic_upstream_transcript_variant,intron_variant                                                   |
| rs980258164 | genic_upstream_transcript_variant,intron_variant                                                   |
| rs980266955 | 3_prime_UTR_variant,non_coding_transcript_variant,genic_downstream_transcript_variant              |
| rs980284598 | genic_upstream_transcript_variant,intron_variant                                                   |
| rs980297714 | genic_upstream_transcript_variant,intron_variant                                                   |
| rs980305036 | genic_upstream_transcript_variant,intron_variant                                                   |
| rs980356821 | intron_variant                                                                                     |
| rs980387264 | genic_upstream_transcript_variant,intron_variant                                                   |
| rs980409941 | genic_upstream_transcript_variant,upstream_transcript_variant,intron_variant                       |
| rs980431892 | intron_variant                                                                                     |
| rs980479988 | intron_variant                                                                                     |
| rs980556323 | genic_upstream_transcript_variant,intron_variant                                                   |
| rs980602576 | genic_upstream_transcript_variant,intron_variant                                                   |
| rs980677568 | genic_upstream_transcript_variant,intron_variant                                                   |
| rs980734134 | intron_variant                                                                                     |
| rs980743994 | intron_variant                                                                                     |
| rs980783723 | genic_downstream_transcript_variant,intron_variant                                                 |
| rs980801337 | genic_upstream_transcript_variant,intron_variant                                                   |
| rs980816174 | intron_variant                                                                                     |
| rs980822794 | genic_upstream_transcript_variant,intron_variant                                                   |
| rs980895613 | genic_upstream_transcript_variant,intron_variant                                                   |
| rs980907795 | genic_downstream_transcript_variant,intron_variant                                                 |
| rs980915605 | intron_variant                                                                                     |
| rs980938493 | genic_downstream_transcript_variant,intron_variant                                                 |
| rs980940721 | 3_prime_UTR_variant,non_coding_transcript_variant,genic_downstream_transcript_variant              |
| rs980945881 | genic_upstream_transcript_variant,intron_variant                                                   |
| rs980976906 | intron_variant                                                                                     |
| rs981007641 | intron_variant                                                                                     |
| rs981038325 | genic_upstream_transcript_variant,intron_variant                                                   |

|             |                                                                                                   |
|-------------|---------------------------------------------------------------------------------------------------|
| rs981040661 | intron_variant                                                                                    |
| rs981075382 | intron_variant                                                                                    |
| rs981081156 | intron_variant                                                                                    |
| rs981147597 | intron_variant                                                                                    |
| rs981149783 | genic_upstream_transcript_variant,2KB_upstream_variant,upstream_transcript_variant,intron_variant |
| rs981209679 | intron_variant                                                                                    |
| rs981214348 | genic_upstream_transcript_variant,intron_variant                                                  |
| rs981214510 | genic_upstream_transcript_variant,intron_variant                                                  |
| rs981224871 | genic_upstream_transcript_variant,2KB_upstream_variant,upstream_transcript_variant,intron_variant |
| rs981251985 | genic_downstream_transcript_variant,intron_variant                                                |
| rs981254877 | intron_variant                                                                                    |
| rs981283339 | genic_upstream_transcript_variant,intron_variant                                                  |
| rs981303623 | genic_downstream_transcript_variant,intron_variant                                                |
| rs981319605 | genic_downstream_transcript_variant,intron_variant                                                |
| rs981395599 | genic_upstream_transcript_variant,intron_variant                                                  |
| rs981397946 | intron_variant                                                                                    |
| rs981401332 | coding_sequence_variant,non_coding_transcript_variant,missense_variant                            |
| rs981408928 | intron_variant                                                                                    |
| rs981450401 | genic_upstream_transcript_variant,intron_variant                                                  |
| rs981460007 | genic_downstream_transcript_variant,intron_variant                                                |
| rs981461485 | intron_variant                                                                                    |
| rs981487430 | genic_upstream_transcript_variant,intron_variant                                                  |
| rs981488639 | genic_downstream_transcript_variant,intron_variant                                                |
| rs981496176 | genic_upstream_transcript_variant,intron_variant                                                  |
| rs981550480 | genic_upstream_transcript_variant,intron_variant                                                  |
| rs981563889 | genic_downstream_transcript_variant,intron_variant                                                |
| rs981566883 | genic_upstream_transcript_variant,intron_variant                                                  |
| rs981592293 | genic_downstream_transcript_variant,intron_variant                                                |
| rs981595494 | genic_downstream_transcript_variant,intron_variant                                                |
| rs981599530 | genic_upstream_transcript_variant,intron_variant                                                  |
| rs981623239 | genic_downstream_transcript_variant,intron_variant                                                |
| rs981653351 | intron_variant                                                                                    |
| rs981664259 | genic_downstream_transcript_variant,intron_variant                                                |
| rs981678972 | intron_variant                                                                                    |
| rs981697277 | intron_variant                                                                                    |
| rs981732952 | intron_variant                                                                                    |
| rs981743946 | intron_variant                                                                                    |
| rs981753425 | intron_variant                                                                                    |
| rs981785248 | intron_variant                                                                                    |
| rs981798654 | genic_upstream_transcript_variant,2KB_upstream_variant,upstream_transcript_variant,intron_variant |
| rs981808954 | genic_upstream_transcript_variant,intron_variant                                                  |
| rs981866256 | genic_downstream_transcript_variant,intron_variant                                                |
| rs981871464 | genic_upstream_transcript_variant,splice_donor_variant,intron_variant                             |
| rs981893345 | genic_upstream_transcript_variant,intron_variant                                                  |
| rs981897939 | genic_upstream_transcript_variant,intron_variant                                                  |
| rs981914762 | genic_downstream_transcript_variant,intron_variant                                                |
| rs981921630 | genic_downstream_transcript_variant,intron_variant                                                |
| rs981945812 | genic_downstream_transcript_variant,intron_variant                                                |
| rs981984090 | intron_variant                                                                                    |
| rs981988350 | genic_downstream_transcript_variant,intron_variant                                                |
| rs982050267 | genic_upstream_transcript_variant,intron_variant                                                  |
| rs982062864 | genic_upstream_transcript_variant,intron_variant                                                  |
| rs982153478 | intron_variant                                                                                    |
| rs982156423 | genic_upstream_transcript_variant,intron_variant                                                  |
| rs982188188 | genic_upstream_transcript_variant,intron_variant                                                  |
| rs982205700 | intron_variant                                                                                    |
| rs982215091 | genic_upstream_transcript_variant,2KB_upstream_variant,upstream_transcript_variant,intron_variant |
| rs982228909 | 3_prime_UTR_variant,non_coding_transcript_variant,genic_downstream_transcript_variant             |
| rs982241089 | genic_downstream_transcript_variant,intron_variant                                                |
| rs982243002 | genic_downstream_transcript_variant,intron_variant                                                |
| rs982293372 | genic_downstream_transcript_variant,intron_variant                                                |
| rs982302923 | genic_upstream_transcript_variant,intron_variant                                                  |
| rs982359583 | intron_variant                                                                                    |
| rs982365238 | intron_variant                                                                                    |
| rs982429223 | genic_downstream_transcript_variant,intron_variant                                                |
| rs982476629 | genic_upstream_transcript_variant,intron_variant                                                  |
| rs982504312 | genic_upstream_transcript_variant,intron_variant                                                  |
| rs982535102 | intron_variant                                                                                    |
| rs982542585 | genic_upstream_transcript_variant,intron_variant                                                  |
| rs982546066 | genic_upstream_transcript_variant,intron_variant                                                  |
| rs982591873 | genic_downstream_transcript_variant,intron_variant                                                |
| rs982657623 | genic_downstream_transcript_variant,intron_variant                                                |
| rs982676702 | genic_upstream_transcript_variant,intron_variant                                                  |
| rs982677865 | genic_upstream_transcript_variant,intron_variant                                                  |

|             |                                                                                                              |
|-------------|--------------------------------------------------------------------------------------------------------------|
| rs982688862 | genic_downstream_transcript_variant,intron_variant                                                           |
| rs982706112 | genic_upstream_transcript_variant,intron_variant                                                             |
| rs982738721 | genic_upstream_transcript_variant,intron_variant                                                             |
| rs982758836 | genic_downstream_transcript_variant,intron_variant                                                           |
| rs982771186 | genic_upstream_transcript_variant,intron_variant                                                             |
| rs982785757 | genic_upstream_transcript_variant,intron_variant                                                             |
| rs982785999 | genic_upstream_transcript_variant,intron_variant                                                             |
| rs982814384 | intron_variant                                                                                               |
| rs982856694 | genic_upstream_transcript_variant,intron_variant                                                             |
| rs982868433 | intron_variant                                                                                               |
| rs982904721 | genic_downstream_transcript_variant,intron_variant                                                           |
| rs982917490 | genic_upstream_transcript_variant,intron_variant                                                             |
| rs982943219 | genic_upstream_transcript_variant,intron_variant                                                             |
| rs982956990 | intron_variant                                                                                               |
| rs982984020 | intron_variant                                                                                               |
| rs983029555 | genic_downstream_transcript_variant,downstream_transcript_variant,intron_variant                             |
| rs983062105 | coding_sequence_variant,non_coding_transcript_variant,missense_variant                                       |
| rs983092606 | genic_downstream_transcript_variant,intron_variant                                                           |
| rs983104186 | intron_variant                                                                                               |
| rs983108059 | genic_upstream_transcript_variant,intron_variant                                                             |
| rs983119377 | genic_upstream_transcript_variant,intron_variant                                                             |
| rs983136026 | genic_upstream_transcript_variant,intron_variant                                                             |
| rs983187368 | intron_variant                                                                                               |
| rs983204340 | intron_variant                                                                                               |
| rs983205344 | intron_variant                                                                                               |
| rs983230288 | genic_upstream_transcript_variant,intron_variant                                                             |
| rs983266661 | intron_variant                                                                                               |
| rs983346380 | genic_downstream_transcript_variant,coding_sequence_variant,synonymous_variant,non_coding_transcript_variant |
| rs983365262 | genic_downstream_transcript_variant,intron_variant                                                           |
| rs983367297 | genic_upstream_transcript_variant,intron_variant                                                             |
| rs983367625 | intron_variant                                                                                               |
| rs983375839 | genic_downstream_transcript_variant,intron_variant                                                           |
| rs983389492 | genic_upstream_transcript_variant,intron_variant                                                             |
| rs983393795 | intron_variant                                                                                               |
| rs983442351 | genic_upstream_transcript_variant,upstream_transcript_variant,intron_variant                                 |
| rs983456405 | intron_variant                                                                                               |
| rs983485541 | 500B_downstream_variant,downstream_transcript_variant                                                        |
| rs983502490 | genic_upstream_transcript_variant,intron_variant                                                             |
| rs983509193 | intron_variant                                                                                               |
| rs983511699 | intron_variant                                                                                               |
| rs983539400 | genic_downstream_transcript_variant,intron_variant                                                           |
| rs983548802 | intron_variant                                                                                               |
| rs983556684 | genic_upstream_transcript_variant,intron_variant                                                             |
| rs983580721 | genic_upstream_transcript_variant,intron_variant                                                             |
| rs983615156 | intron_variant                                                                                               |
| rs983622411 | intron_variant                                                                                               |
| rs983626668 | intron_variant                                                                                               |
| rs983632505 | genic_downstream_transcript_variant,intron_variant                                                           |
| rs983633422 | genic_downstream_transcript_variant,intron_variant                                                           |
| rs983670669 | genic_upstream_transcript_variant,intron_variant                                                             |
| rs983672340 | genic_upstream_transcript_variant,intron_variant                                                             |
| rs983704657 | intron_variant                                                                                               |
| rs983740463 | genic_upstream_transcript_variant,intron_variant                                                             |
| rs983766848 | genic_upstream_transcript_variant,intron_variant                                                             |
| rs983771549 | genic_downstream_transcript_variant,intron_variant                                                           |
| rs983790241 | intron_variant                                                                                               |
| rs983836319 | intron_variant                                                                                               |
| rs983854121 | genic_upstream_transcript_variant,intron_variant                                                             |
| rs983859953 | intron_variant                                                                                               |
| rs983882657 | intron_variant                                                                                               |
| rs983888612 | intron_variant                                                                                               |
| rs983894994 | genic_upstream_transcript_variant,intron_variant                                                             |
| rs983907199 | genic_upstream_transcript_variant,intron_variant                                                             |
| rs983910802 | genic_upstream_transcript_variant,intron_variant                                                             |
| rs983920878 | genic_upstream_transcript_variant,intron_variant                                                             |
| rs983944622 | genic_upstream_transcript_variant,2KB_upstream_variant,upstream_transcript_variant,intron_variant            |
| rs983954517 | intron_variant                                                                                               |
| rs983979332 | genic_upstream_transcript_variant,intron_variant                                                             |
| rs984043025 | genic_upstream_transcript_variant,intron_variant                                                             |
| rs984051672 | genic_downstream_transcript_variant,intron_variant                                                           |
| rs984060325 | genic_downstream_transcript_variant,intron_variant                                                           |
| rs984093176 | intron_variant                                                                                               |
| rs984127679 | intron_variant                                                                                               |
| rs984138307 | intron_variant                                                                                               |

|             |                                                                                                   |
|-------------|---------------------------------------------------------------------------------------------------|
| rs984156001 | intron_variant                                                                                    |
| rs984156651 | 500B_downstream_variant,downstream_transcript_variant                                             |
| rs984181799 | intron_variant                                                                                    |
| rs984187930 | genic_downstream_transcript_variant,intron_variant                                                |
| rs984207832 | 500B_downstream_variant,downstream_transcript_variant                                             |
| rs984209707 | intron_variant                                                                                    |
| rs984233093 | intron_variant                                                                                    |
| rs984296386 | genic_downstream_transcript_variant,intron_variant                                                |
| rs984296847 | genic_upstream_transcript_variant,intron_variant                                                  |
| rs984297769 | intron_variant                                                                                    |
| rs984303861 | genic_downstream_transcript_variant,intron_variant                                                |
| rs984310200 | genic_downstream_transcript_variant,intron_variant                                                |
| rs984310666 | genic_upstream_transcript_variant,intron_variant                                                  |
| rs984324874 | intron_variant                                                                                    |
| rs984387603 | genic_upstream_transcript_variant,2KB_upstream_variant,upstream_transcript_variant,intron_variant |
| rs984461811 | genic_upstream_transcript_variant,intron_variant                                                  |
| rs984491304 | intron_variant                                                                                    |
| rs984512189 | intron_variant                                                                                    |
| rs984513517 | intron_variant                                                                                    |
| rs984538353 | genic_upstream_transcript_variant,intron_variant                                                  |
| rs984544465 | 3_prime_UTR_variant,non_coding_transcript_variant,genic_downstream_transcript_variant             |
| rs984568706 | intron_variant                                                                                    |
| rs984588935 | genic_downstream_transcript_variant,intron_variant                                                |
| rs984662707 | genic_downstream_transcript_variant,intron_variant                                                |
| rs984717910 | genic_downstream_transcript_variant,intron_variant                                                |
| rs984720689 | genic_upstream_transcript_variant,intron_variant                                                  |
| rs984732913 | intron_variant                                                                                    |
| rs984751094 | intron_variant                                                                                    |
| rs984766441 | genic_upstream_transcript_variant,intron_variant                                                  |
| rs984805752 | genic_upstream_transcript_variant,upstream_transcript_variant,intron_variant                      |
| rs984807765 | intron_variant                                                                                    |
| rs984825765 | genic_upstream_transcript_variant,2KB_upstream_variant,upstream_transcript_variant,intron_variant |
| rs984829473 | genic_upstream_transcript_variant,2KB_upstream_variant,upstream_transcript_variant,intron_variant |
| rs984833025 | genic_upstream_transcript_variant,2KB_upstream_variant,upstream_transcript_variant,intron_variant |
| rs984850525 | intron_variant                                                                                    |
| rs984878998 | genic_upstream_transcript_variant,intron_variant                                                  |
| rs984908068 | intron_variant                                                                                    |
| rs984933304 | genic_upstream_transcript_variant,intron_variant                                                  |
| rs984944560 | genic_downstream_transcript_variant,intron_variant                                                |
| rs984959449 | intron_variant                                                                                    |
| rs984974349 | genic_upstream_transcript_variant,intron_variant                                                  |
| rs985011629 | genic_downstream_transcript_variant,intron_variant                                                |
| rs985020066 | genic_downstream_transcript_variant,intron_variant                                                |
| rs985042800 | genic_downstream_transcript_variant,intron_variant                                                |
| rs985063541 | genic_downstream_transcript_variant,intron_variant                                                |
| rs985064204 | genic_upstream_transcript_variant,intron_variant                                                  |
| rs985111649 | intron_variant                                                                                    |
| rs985157132 | intron_variant                                                                                    |
| rs985164120 | intron_variant                                                                                    |
| rs985169263 | genic_upstream_transcript_variant,intron_variant                                                  |
| rs985193426 | genic_upstream_transcript_variant,intron_variant                                                  |
| rs985225244 | intron_variant                                                                                    |
| rs985277397 | genic_upstream_transcript_variant,intron_variant                                                  |
| rs985278429 | genic_upstream_transcript_variant,2KB_upstream_variant,upstream_transcript_variant,intron_variant |
| rs985327431 | intron_variant                                                                                    |
| rs985355743 | intron_variant                                                                                    |
| rs985359405 | genic_upstream_transcript_variant,intron_variant                                                  |
| rs985363632 | intron_variant                                                                                    |
| rs985370405 | genic_upstream_transcript_variant,2KB_upstream_variant,upstream_transcript_variant,intron_variant |
| rs985387018 | intron_variant                                                                                    |
| rs985402205 | genic_upstream_transcript_variant,intron_variant                                                  |
| rs985429214 | genic_upstream_transcript_variant,intron_variant                                                  |
| rs985467106 | genic_upstream_transcript_variant,intron_variant                                                  |
| rs985480005 | genic_downstream_transcript_variant,intron_variant                                                |
| rs985584769 | genic_upstream_transcript_variant,intron_variant                                                  |
| rs985598257 | intron_variant                                                                                    |
| rs985617469 | intron_variant                                                                                    |
| rs985627295 | intron_variant                                                                                    |
| rs985628201 | intron_variant                                                                                    |
| rs985632681 | genic_downstream_transcript_variant,intron_variant                                                |
| rs985647164 | genic_downstream_transcript_variant,intron_variant                                                |
| rs985714336 | intron_variant                                                                                    |
| rs985720581 | genic_upstream_transcript_variant,intron_variant                                                  |
| rs985739376 | intron_variant                                                                                    |

|             |                                                                                                   |
|-------------|---------------------------------------------------------------------------------------------------|
| rs985758632 | genic_upstream_transcript_variant,2KB_upstream_variant,upstream_transcript_variant,intron_variant |
| rs985778943 | genic_upstream_transcript_variant,intron_variant                                                  |
| rs985823701 | genic_downstream_transcript_variant,intron_variant                                                |
| rs985847645 | genic_downstream_transcript_variant,intron_variant                                                |
| rs985880501 | intron_variant                                                                                    |
| rs985896772 | intron_variant                                                                                    |
| rs985915572 | genic_upstream_transcript_variant,intron_variant                                                  |
| rs985966056 | intron_variant                                                                                    |
| rs985979245 | genic_downstream_transcript_variant,intron_variant                                                |
| rs986021572 | genic_upstream_transcript_variant,intron_variant                                                  |
| rs986041806 | genic_upstream_transcript_variant,intron_variant                                                  |
| rs986046831 | intron_variant                                                                                    |
| rs986049671 | genic_downstream_transcript_variant,intron_variant                                                |
| rs986054862 | genic_upstream_transcript_variant,intron_variant                                                  |
| rs986087961 | genic_upstream_transcript_variant,2KB_upstream_variant,upstream_transcript_variant,intron_variant |
| rs986090866 | intron_variant                                                                                    |
| rs986091685 | intron_variant                                                                                    |
| rs986099847 | genic_downstream_transcript_variant,intron_variant                                                |
| rs986113526 | genic_upstream_transcript_variant,2KB_upstream_variant,upstream_transcript_variant,intron_variant |
| rs986120623 | genic_upstream_transcript_variant,upstream_transcript_variant,5_prime_UTR_variant,intron_variant  |
| rs986147447 | genic_upstream_transcript_variant,intron_variant                                                  |
| rs986158033 | genic_upstream_transcript_variant,intron_variant                                                  |
| rs986228826 | genic_upstream_transcript_variant,upstream_transcript_variant,intron_variant                      |
| rs986248335 | genic_upstream_transcript_variant,intron_variant                                                  |
| rs986281116 | genic_upstream_transcript_variant,upstream_transcript_variant,intron_variant                      |
| rs986303962 | intron_variant                                                                                    |
| rs986353414 | genic_upstream_transcript_variant,intron_variant                                                  |
| rs986356422 | intron_variant                                                                                    |
| rs986395349 | genic_upstream_transcript_variant,2KB_upstream_variant,upstream_transcript_variant,intron_variant |
| rs986414591 | genic_downstream_transcript_variant,intron_variant                                                |
| rs986461754 | genic_downstream_transcript_variant,intron_variant                                                |
| rs986466722 | genic_upstream_transcript_variant,intron_variant                                                  |
| rs986481251 | intron_variant                                                                                    |
| rs986494432 | intron_variant                                                                                    |
| rs986499245 | genic_upstream_transcript_variant,intron_variant                                                  |
| rs986517162 | intron_variant                                                                                    |
| rs986599862 | genic_upstream_transcript_variant,intron_variant                                                  |
| rs986623896 | intron_variant                                                                                    |
| rs986667524 | genic_downstream_transcript_variant,intron_variant                                                |
| rs986687913 | genic_upstream_transcript_variant,intron_variant                                                  |
| rs986692396 | intron_variant                                                                                    |
| rs986692608 | genic_upstream_transcript_variant,intron_variant                                                  |
| rs986724774 | genic_upstream_transcript_variant,intron_variant                                                  |
| rs986745488 | intron_variant                                                                                    |
| rs986758299 | intron_variant                                                                                    |
| rs986800524 | intron_variant                                                                                    |
| rs986821204 | genic_upstream_transcript_variant,intron_variant                                                  |
| rs986828891 | genic_downstream_transcript_variant,intron_variant                                                |
| rs986864727 | genic_upstream_transcript_variant,intron_variant                                                  |
| rs986898199 | genic_upstream_transcript_variant,intron_variant                                                  |
| rs986914324 | intron_variant                                                                                    |
| rs986976255 | genic_upstream_transcript_variant,intron_variant                                                  |
| rs987020406 | intron_variant                                                                                    |
| rs987027105 | genic_upstream_transcript_variant,intron_variant                                                  |
| rs987027755 | intron_variant                                                                                    |
| rs987069860 | genic_upstream_transcript_variant,intron_variant                                                  |
| rs987113308 | 3_prime_UTR_variant,non_coding_transcript_variant,genic_downstream_transcript_variant             |
| rs987144308 | 3_prime_UTR_variant,non_coding_transcript_variant,genic_downstream_transcript_variant             |
| rs987157549 | genic_upstream_transcript_variant,intron_variant                                                  |
| rs987181894 | intron_variant                                                                                    |
| rs987184423 | genic_downstream_transcript_variant,intron_variant                                                |
| rs987225984 | genic_upstream_transcript_variant,intron_variant                                                  |
| rs987231220 | genic_upstream_transcript_variant,intron_variant                                                  |
| rs987266854 | genic_downstream_transcript_variant,intron_variant                                                |
| rs987275827 | genic_upstream_transcript_variant,intron_variant                                                  |
| rs987305948 | genic_upstream_transcript_variant,intron_variant                                                  |
| rs987361341 | intron_variant                                                                                    |
| rs987418073 | genic_downstream_transcript_variant,intron_variant                                                |
| rs987437769 | genic_downstream_transcript_variant,intron_variant                                                |
| rs987466238 | genic_upstream_transcript_variant,intron_variant                                                  |
| rs987496487 | intron_variant                                                                                    |
| rs987506288 | intron_variant                                                                                    |
| rs987508441 | intron_variant                                                                                    |
| rs987548752 | intron_variant                                                                                    |

|             |                                                                                                   |
|-------------|---------------------------------------------------------------------------------------------------|
| rs987553968 | genic_downstream_transcript_variant,intron_variant                                                |
| rs987611282 | genic_downstream_transcript_variant,intron_variant                                                |
| rs987647463 | intron_variant                                                                                    |
| rs987656402 | genic_downstream_transcript_variant,intron_variant                                                |
| rs987718318 | genic_upstream_transcript_variant,intron_variant                                                  |
| rs987720028 | genic_downstream_transcript_variant,intron_variant                                                |
| rs987720467 | intron_variant                                                                                    |
| rs987726650 | genic_upstream_transcript_variant,2KB_upstream_variant,upstream_transcript_variant,intron_variant |
| rs987730503 | genic_upstream_transcript_variant,intron_variant                                                  |
| rs987747265 | genic_upstream_transcript_variant,intron_variant                                                  |
| rs987752856 | genic_upstream_transcript_variant,intron_variant                                                  |
| rs987773786 | intron_variant                                                                                    |
| rs987833441 | genic_upstream_transcript_variant,intron_variant                                                  |
| rs987843104 | intron_variant                                                                                    |
| rs987862665 | genic_upstream_transcript_variant,2KB_upstream_variant,upstream_transcript_variant,intron_variant |
| rs987889236 | intron_variant                                                                                    |
| rs987939302 | intron_variant                                                                                    |
| rs987939626 | genic_upstream_transcript_variant,intron_variant                                                  |
| rs987977911 | genic_downstream_transcript_variant,intron_variant                                                |
| rs987991819 | genic_upstream_transcript_variant,intron_variant                                                  |
| rs988011806 | genic_upstream_transcript_variant,intron_variant                                                  |
| rs988029193 | genic_upstream_transcript_variant,intron_variant                                                  |
| rs988051715 | genic_downstream_transcript_variant,intron_variant                                                |
| rs988080681 | genic_upstream_transcript_variant,intron_variant                                                  |
| rs988091939 | intron_variant                                                                                    |
| rs988163911 | genic_downstream_transcript_variant,intron_variant                                                |
| rs988183383 | genic_upstream_transcript_variant,intron_variant                                                  |
| rs988206652 | intron_variant                                                                                    |
| rs988237974 | genic_downstream_transcript_variant,intron_variant                                                |
| rs988296665 | genic_upstream_transcript_variant,intron_variant                                                  |
| rs988326618 | intron_variant                                                                                    |
| rs988327106 | intron_variant                                                                                    |
| rs988349846 | genic_upstream_transcript_variant,intron_variant                                                  |
| rs988361797 | intron_variant                                                                                    |
| rs988406582 | intron_variant                                                                                    |
| rs988431995 | genic_upstream_transcript_variant,intron_variant                                                  |
| rs988499793 | genic_upstream_transcript_variant,intron_variant                                                  |
| rs988503943 | genic_downstream_transcript_variant,intron_variant                                                |
| rs988513498 | intron_variant                                                                                    |
| rs988531077 | genic_upstream_transcript_variant,intron_variant                                                  |
| rs988565673 | intron_variant                                                                                    |
| rs988575764 | genic_upstream_transcript_variant,intron_variant                                                  |
| rs988583716 | genic_downstream_transcript_variant,intron_variant                                                |
| rs988668429 | 3_prime_UTR_variant,non_coding_transcript_variant,genic_downstream_transcript_variant             |
| rs988697351 | intron_variant                                                                                    |
| rs988753781 | intron_variant                                                                                    |
| rs988776588 | genic_upstream_transcript_variant,intron_variant                                                  |
| rs988791784 | genic_upstream_transcript_variant,intron_variant                                                  |
| rs988815418 | genic_downstream_transcript_variant,intron_variant                                                |
| rs988849951 | genic_upstream_transcript_variant,intron_variant                                                  |
| rs988886123 | genic_downstream_transcript_variant,intron_variant                                                |
| rs988894084 | genic_upstream_transcript_variant,upstream_transcript_variant,5_prime_UTR_variant,intron_variant  |
| rs988915282 | intron_variant                                                                                    |
| rs988926131 | genic_upstream_transcript_variant,intron_variant                                                  |
| rs988927727 | genic_upstream_transcript_variant,intron_variant                                                  |
| rs988964281 | genic_upstream_transcript_variant,intron_variant                                                  |
| rs988977811 | intron_variant                                                                                    |
| rs989048729 | intron_variant                                                                                    |
| rs989087729 | intron_variant                                                                                    |
| rs989095276 | intron_variant                                                                                    |
| rs989099156 | genic_downstream_transcript_variant,intron_variant                                                |
| rs989103431 | genic_upstream_transcript_variant,intron_variant                                                  |
| rs989168407 | genic_downstream_transcript_variant,intron_variant                                                |
| rs989176315 | intron_variant                                                                                    |
| rs989179135 | intron_variant                                                                                    |
| rs989190168 | intron_variant                                                                                    |
| rs989194073 | genic_upstream_transcript_variant,intron_variant                                                  |
| rs989198149 | genic_downstream_transcript_variant,intron_variant                                                |
| rs989232737 | intron_variant                                                                                    |
| rs989324791 | genic_downstream_transcript_variant,intron_variant                                                |
| rs989348912 | intron_variant                                                                                    |
| rs989369657 | intron_variant                                                                                    |
| rs989406007 | genic_upstream_transcript_variant,intron_variant                                                  |
| rs989408663 | genic_downstream_transcript_variant,intron_variant                                                |

|             |                                                                                                   |
|-------------|---------------------------------------------------------------------------------------------------|
| rs989427485 | genic_upstream_transcript_variant,intron_variant                                                  |
| rs989434404 | intron_variant                                                                                    |
| rs989462044 | genic_upstream_transcript_variant,intron_variant                                                  |
| rs989470725 | genic_upstream_transcript_variant,intron_variant                                                  |
| rs989505963 | genic_downstream_transcript_variant,intron_variant                                                |
| rs989601976 | intron_variant                                                                                    |
| rs989683659 | genic_upstream_transcript_variant,intron_variant                                                  |
| rs989705330 | genic_upstream_transcript_variant,intron_variant                                                  |
| rs989714104 | intron_variant                                                                                    |
| rs989718727 | genic_upstream_transcript_variant,intron_variant                                                  |
| rs989758811 | intron_variant                                                                                    |
| rs989773239 | genic_downstream_transcript_variant,intron_variant                                                |
| rs989795579 | genic_upstream_transcript_variant,intron_variant                                                  |
| rs989797000 | 2KB_upstream_variant,genic_upstream_transcript_variant,upstream_transcript_variant,intron_variant |
| rs989806139 | intron_variant                                                                                    |
| rs989849573 | intron_variant                                                                                    |
| rs989849784 | intron_variant                                                                                    |
| rs989881732 | genic_downstream_transcript_variant,intron_variant                                                |
| rs989895818 | genic_upstream_transcript_variant,intron_variant                                                  |
| rs989896685 | genic_upstream_transcript_variant,intron_variant                                                  |
| rs989917810 | genic_upstream_transcript_variant,intron_variant                                                  |
| rs989938278 | genic_upstream_transcript_variant,intron_variant                                                  |
| rs990017039 | intron_variant                                                                                    |
| rs990049323 | intron_variant                                                                                    |
| rs990053641 | genic_upstream_transcript_variant,intron_variant                                                  |
| rs990065840 | genic_upstream_transcript_variant,intron_variant                                                  |
| rs990070124 | genic_upstream_transcript_variant,intron_variant                                                  |
| rs990081136 | genic_upstream_transcript_variant,intron_variant                                                  |
| rs990134645 | genic_upstream_transcript_variant,intron_variant                                                  |
| rs990154098 | intron_variant                                                                                    |
| rs990176631 | genic_upstream_transcript_variant,intron_variant                                                  |
| rs990189238 | genic_downstream_transcript_variant,intron_variant                                                |
| rs990207732 | genic_upstream_transcript_variant,intron_variant                                                  |
| rs990235861 | downstream_transcript_variant,500B_downstream_variant                                             |
| rs990252958 | intron_variant                                                                                    |
| rs990256435 | genic_downstream_transcript_variant,intron_variant                                                |
| rs990314661 | downstream_transcript_variant,500B_downstream_variant                                             |
| rs990326581 | genic_upstream_transcript_variant,intron_variant                                                  |
| rs990343551 | intron_variant                                                                                    |
| rs990371186 | genic_upstream_transcript_variant,intron_variant                                                  |
| rs990409276 | 2KB_upstream_variant,genic_upstream_transcript_variant,upstream_transcript_variant,intron_variant |
| rs990487563 | intron_variant                                                                                    |
| rs990517508 | genic_upstream_transcript_variant,intron_variant                                                  |
| rs990522367 | intron_variant                                                                                    |
| rs990534696 | genic_upstream_transcript_variant,intron_variant                                                  |
| rs990541339 | genic_upstream_transcript_variant,intron_variant                                                  |
| rs990552853 | intron_variant                                                                                    |
| rs990584028 | genic_upstream_transcript_variant,intron_variant                                                  |
| rs990655739 | genic_upstream_transcript_variant,intron_variant                                                  |
| rs990664513 | genic_downstream_transcript_variant,intron_variant                                                |
| rs990678243 | genic_upstream_transcript_variant,intron_variant                                                  |
| rs990685314 | intron_variant                                                                                    |
| rs990699363 | genic_downstream_transcript_variant,intron_variant                                                |
| rs990710128 | intron_variant                                                                                    |
| rs990711829 | genic_downstream_transcript_variant,intron_variant                                                |
| rs990722629 | intron_variant                                                                                    |
| rs990725522 | intron_variant                                                                                    |
| rs990769847 | genic_upstream_transcript_variant,intron_variant                                                  |
| rs990775058 | intron_variant                                                                                    |
| rs990810039 | genic_upstream_transcript_variant,intron_variant                                                  |
| rs990835856 | genic_upstream_transcript_variant,intron_variant                                                  |
| rs990882775 | genic_upstream_transcript_variant,intron_variant                                                  |
| rs990887610 | intron_variant                                                                                    |
| rs990930106 | genic_upstream_transcript_variant,intron_variant                                                  |
| rs990930546 | genic_upstream_transcript_variant,intron_variant                                                  |
| rs990933387 | intron_variant                                                                                    |
| rs990954161 | genic_upstream_transcript_variant,intron_variant                                                  |
| rs990986455 | intron_variant                                                                                    |
| rs991006414 | genic_upstream_transcript_variant,intron_variant                                                  |
| rs991006697 | genic_upstream_transcript_variant,intron_variant                                                  |
| rs991052338 | intron_variant                                                                                    |
| rs991059198 | 2KB_upstream_variant,genic_upstream_transcript_variant,upstream_transcript_variant,intron_variant |
| rs991065157 | genic_upstream_transcript_variant,intron_variant                                                  |
| rs991129711 | intron_variant                                                                                    |

|             |                                                                                                   |
|-------------|---------------------------------------------------------------------------------------------------|
| rs991130335 | genic_upstream_transcript_variant,intron_variant                                                  |
| rs991153114 | intron_variant                                                                                    |
| rs991186035 | genic_upstream_transcript_variant,intron_variant                                                  |
| rs991205896 | genic_upstream_transcript_variant,intron_variant                                                  |
| rs991206513 | genic_upstream_transcript_variant,intron_variant                                                  |
| rs991206925 | intron_variant                                                                                    |
| rs991267818 | genic_upstream_transcript_variant,intron_variant                                                  |
| rs991281941 | 2KB_upstream_variant,genic_upstream_transcript_variant,upstream_transcript_variant,intron_variant |
| rs991291109 | genic_upstream_transcript_variant,intron_variant                                                  |
| rs991329093 | genic_upstream_transcript_variant,intron_variant                                                  |
| rs991337030 | genic_upstream_transcript_variant,intron_variant                                                  |
| rs991441243 | genic_upstream_transcript_variant,intron_variant                                                  |
| rs991442086 | intron_variant                                                                                    |
| rs991469471 | genic_downstream_transcript_variant,intron_variant                                                |
| rs991491791 | genic_upstream_transcript_variant,intron_variant                                                  |
| rs991515989 | genic_upstream_transcript_variant,intron_variant                                                  |
| rs991525012 | genic_downstream_transcript_variant,intron_variant                                                |
| rs991548906 | genic_upstream_transcript_variant,intron_variant                                                  |
| rs991559473 | intron_variant                                                                                    |
| rs991581488 | 2KB_upstream_variant,genic_upstream_transcript_variant,upstream_transcript_variant,intron_variant |
| rs991606505 | genic_downstream_transcript_variant,intron_variant                                                |
| rs991622405 | genic_downstream_transcript_variant,intron_variant                                                |
| rs991631759 | intron_variant                                                                                    |
| rs991658716 | intron_variant                                                                                    |
| rs991661249 | genic_upstream_transcript_variant,intron_variant                                                  |
| rs991700463 | genic_downstream_transcript_variant,intron_variant                                                |
| rs991705596 | intron_variant                                                                                    |
| rs991715197 | intron_variant                                                                                    |
| rs991734264 | genic_downstream_transcript_variant,intron_variant                                                |
| rs991739492 | genic_upstream_transcript_variant,intron_variant                                                  |
| rs991763134 | genic_upstream_transcript_variant,intron_variant                                                  |
| rs991771212 | genic_upstream_transcript_variant,intron_variant                                                  |
| rs991808143 | genic_upstream_transcript_variant,intron_variant                                                  |
| rs991869722 | 2KB_upstream_variant,genic_upstream_transcript_variant,upstream_transcript_variant,intron_variant |
| rs991897273 | intron_variant                                                                                    |
| rs991943492 | genic_upstream_transcript_variant,intron_variant                                                  |
| rs991973659 | intron_variant                                                                                    |
| rs991986446 | intron_variant                                                                                    |
| rs991988641 | genic_upstream_transcript_variant,intron_variant                                                  |
| rs992033274 | genic_downstream_transcript_variant,intron_variant                                                |
| rs992049401 | genic_upstream_transcript_variant,intron_variant                                                  |
| rs992070374 | genic_downstream_transcript_variant,intron_variant                                                |
| rs992117060 | genic_downstream_transcript_variant,intron_variant                                                |
| rs992118366 | genic_upstream_transcript_variant,intron_variant                                                  |
| rs992127980 | intron_variant                                                                                    |
| rs992142681 | intron_variant                                                                                    |
| rs992165999 | genic_downstream_transcript_variant,intron_variant                                                |
| rs992187660 | genic_upstream_transcript_variant,intron_variant                                                  |
| rs992196815 | genic_downstream_transcript_variant,intron_variant                                                |
| rs992207730 | genic_downstream_transcript_variant,intron_variant                                                |
| rs992207872 | genic_upstream_transcript_variant,intron_variant                                                  |
| rs992253090 | genic_downstream_transcript_variant,intron_variant                                                |
| rs992286735 | genic_upstream_transcript_variant,intron_variant                                                  |
| rs992296182 | intron_variant                                                                                    |
| rs992310986 | genic_downstream_transcript_variant,intron_variant                                                |
| rs992311181 | intron_variant                                                                                    |
| rs992318612 | intron_variant                                                                                    |
| rs992318885 | genic_upstream_transcript_variant,intron_variant                                                  |
| rs992332467 | genic_upstream_transcript_variant,intron_variant                                                  |
| rs992436511 | intron_variant                                                                                    |
| rs992451383 | intron_variant                                                                                    |
| rs992453949 | genic_upstream_transcript_variant,intron_variant                                                  |
| rs992457555 | intron_variant                                                                                    |
| rs992460190 | genic_downstream_transcript_variant,intron_variant                                                |
| rs992514559 | intron_variant                                                                                    |
| rs992545867 | intron_variant                                                                                    |
| rs992600347 | genic_upstream_transcript_variant,intron_variant                                                  |
| rs992612842 | genic_downstream_transcript_variant,intron_variant                                                |
| rs992620810 | intron_variant                                                                                    |
| rs992676718 | genic_downstream_transcript_variant,intron_variant                                                |
| rs992680197 | genic_downstream_transcript_variant,intron_variant                                                |
| rs992688421 | intron_variant                                                                                    |
| rs992721848 | genic_downstream_transcript_variant,intron_variant                                                |
| rs992733809 | intron_variant                                                                                    |

|             |                                                                                                  |
|-------------|--------------------------------------------------------------------------------------------------|
| rs992737239 | genic_downstream_transcript_variant,intron_variant                                               |
| rs992741818 | genic_upstream_transcript_variant,intron_variant                                                 |
| rs992776395 | intron_variant                                                                                   |
| rs992791698 | genic_downstream_transcript_variant,intron_variant                                               |
| rs992797905 | genic_upstream_transcript_variant,intron_variant                                                 |
| rs992798021 | genic_downstream_transcript_variant,intron_variant                                               |
| rs992824518 | genic_upstream_transcript_variant,intron_variant                                                 |
| rs992830734 | intron_variant                                                                                   |
| rs992889106 | intron_variant                                                                                   |
| rs992899466 | intron_variant                                                                                   |
| rs992920676 | intron_variant                                                                                   |
| rs992957608 | genic_upstream_transcript_variant,intron_variant                                                 |
| rs992997056 | intron_variant,upstream_transcript_variant,genic_upstream_transcript_variant,5_prime_UTR_variant |
| rs993008015 | intron_variant                                                                                   |
| rs993013195 | intron_variant                                                                                   |
| rs993039930 | intron_variant                                                                                   |
| rs993056851 | genic_upstream_transcript_variant,intron_variant                                                 |
| rs993178028 | genic_downstream_transcript_variant,intron_variant                                               |
| rs993178168 | genic_upstream_transcript_variant,intron_variant                                                 |
| rs993191651 | genic_downstream_transcript_variant,intron_variant                                               |
| rs993207007 | genic_upstream_transcript_variant,intron_variant                                                 |
| rs993246408 | genic_downstream_transcript_variant,intron_variant                                               |
| rs993256566 | genic_upstream_transcript_variant,intron_variant                                                 |
| rs993259196 | intron_variant                                                                                   |
| rs993303089 | genic_downstream_transcript_variant,intron_variant                                               |
| rs993334324 | genic_downstream_transcript_variant,intron_variant                                               |
| rs993379881 | genic_upstream_transcript_variant,intron_variant                                                 |
| rs993402209 | intron_variant                                                                                   |
| rs993440131 | intron_variant                                                                                   |
| rs993441251 | genic_upstream_transcript_variant,intron_variant                                                 |
| rs993463693 | coding_sequence_variant,non_coding_transcript_variant,missense_variant                           |
| rs993471987 | genic_upstream_transcript_variant,intron_variant                                                 |
| rs993491152 | genic_upstream_transcript_variant,intron_variant                                                 |
| rs993505280 | genic_upstream_transcript_variant,intron_variant                                                 |
| rs993523915 | intron_variant                                                                                   |
| rs993604360 | genic_downstream_transcript_variant,intron_variant                                               |
| rs993613857 | genic_downstream_transcript_variant,intron_variant                                               |
| rs993637163 | genic_downstream_transcript_variant,intron_variant                                               |
| rs993642679 | intron_variant                                                                                   |
| rs993656177 | intron_variant                                                                                   |
| rs993670583 | genic_upstream_transcript_variant,intron_variant                                                 |
| rs993685645 | genic_upstream_transcript_variant,intron_variant                                                 |
| rs993706328 | intron_variant                                                                                   |
| rs993739199 | intron_variant                                                                                   |
| rs993770244 | intron_variant                                                                                   |
| rs993774563 | genic_upstream_transcript_variant,intron_variant                                                 |
| rs993797898 | intron_variant                                                                                   |
| rs993805774 | genic_upstream_transcript_variant,intron_variant                                                 |
| rs993826820 | intron_variant                                                                                   |
| rs993829568 | genic_downstream_transcript_variant,intron_variant                                               |
| rs993846364 | genic_downstream_transcript_variant,intron_variant                                               |
| rs993855215 | intron_variant                                                                                   |
| rs993863440 | intron_variant                                                                                   |
| rs993917587 | genic_upstream_transcript_variant,intron_variant                                                 |
| rs993917843 | intron_variant                                                                                   |
| rs993930730 | intron_variant                                                                                   |
| rs993939813 | genic_downstream_transcript_variant,intron_variant                                               |
| rs993958690 | intron_variant                                                                                   |
| rs993960836 | genic_upstream_transcript_variant,intron_variant                                                 |
| rs993960848 | upstream_transcript_variant,genic_upstream_transcript_variant,intron_variant                     |
| rs993969559 | genic_downstream_transcript_variant,intron_variant                                               |
| rs993979083 | intron_variant                                                                                   |
| rs994038131 | intron_variant                                                                                   |
| rs994072372 | intron_variant                                                                                   |
| rs994078101 | genic_downstream_transcript_variant,intron_variant                                               |
| rs994098897 | genic_downstream_transcript_variant,intron_variant                                               |
| rs994102053 | intron_variant                                                                                   |
| rs994130367 | genic_upstream_transcript_variant,intron_variant                                                 |
| rs994131939 | genic_upstream_transcript_variant,intron_variant                                                 |
| rs994133135 | intron_variant                                                                                   |
| rs994147235 | genic_downstream_transcript_variant,intron_variant                                               |
| rs994165900 | intron_variant                                                                                   |
| rs994168985 | genic_upstream_transcript_variant,intron_variant                                                 |
| rs994171070 | genic_upstream_transcript_variant,intron_variant                                                 |

|             |                                                                                       |
|-------------|---------------------------------------------------------------------------------------|
| rs994188177 | intron_variant                                                                        |
| rs994221243 | genic_upstream_transcript_variant,intron_variant                                      |
| rs994243395 | intron_variant                                                                        |
| rs994253237 | genic_downstream_transcript_variant,intron_variant                                    |
| rs994342540 | intron_variant                                                                        |
| rs994362958 | genic_downstream_transcript_variant,intron_variant                                    |
| rs994368430 | genic_upstream_transcript_variant,intron_variant                                      |
| rs994408280 | genic_upstream_transcript_variant,intron_variant                                      |
| rs994433716 | intron_variant                                                                        |
| rs994449189 | genic_upstream_transcript_variant,intron_variant                                      |
| rs994449938 | genic_downstream_transcript_variant,intron_variant                                    |
| rs994481142 | genic_downstream_transcript_variant,intron_variant                                    |
| rs994502877 | genic_upstream_transcript_variant,intron_variant                                      |
| rs994504555 | intron_variant                                                                        |
| rs994563287 | genic_upstream_transcript_variant,intron_variant                                      |
| rs994563692 | genic_upstream_transcript_variant,intron_variant                                      |
| rs994569872 | intron_variant                                                                        |
| rs994572662 | genic_upstream_transcript_variant,intron_variant                                      |
| rs994657746 | genic_downstream_transcript_variant,intron_variant                                    |
| rs994668730 | genic_upstream_transcript_variant,intron_variant                                      |
| rs994715212 | intron_variant                                                                        |
| rs994747518 | genic_downstream_transcript_variant,intron_variant                                    |
| rs994748444 | intron_variant                                                                        |
| rs994816846 | intron_variant                                                                        |
| rs994836131 | genic_upstream_transcript_variant,intron_variant                                      |
| rs994914510 | genic_downstream_transcript_variant,intron_variant                                    |
| rs994916914 | intron_variant                                                                        |
| rs994945808 | genic_upstream_transcript_variant,intron_variant                                      |
| rs994984192 | intron_variant                                                                        |
| rs995002483 | genic_upstream_transcript_variant,intron_variant                                      |
| rs995008616 | 3_prime_UTR_variant,genic_downstream_transcript_variant,non_coding_transcript_variant |
| rs995013621 | intron_variant                                                                        |
| rs995040442 | genic_downstream_transcript_variant,intron_variant                                    |
| rs995087774 | genic_downstream_transcript_variant,intron_variant                                    |
| rs995097064 | intron_variant                                                                        |
| rs995108743 | genic_upstream_transcript_variant,intron_variant                                      |
| rs995119569 | genic_upstream_transcript_variant,intron_variant                                      |
| rs995170419 | genic_upstream_transcript_variant,intron_variant                                      |
| rs995201080 | genic_downstream_transcript_variant,intron_variant                                    |
| rs995271235 | intron_variant                                                                        |
| rs995310318 | downstream_transcript_variant,500B_downstream_variant                                 |
| rs995327283 | genic_upstream_transcript_variant,intron_variant                                      |
| rs995336445 | intron_variant                                                                        |
| rs995347729 | intron_variant                                                                        |
| rs995358106 | genic_upstream_transcript_variant,intron_variant                                      |
| rs995370095 | intron_variant                                                                        |
| rs995382671 | intron_variant                                                                        |
| rs995441347 | genic_upstream_transcript_variant,intron_variant                                      |
| rs995443711 | intron_variant                                                                        |
| rs995454502 | genic_upstream_transcript_variant,intron_variant                                      |
| rs995586811 | genic_upstream_transcript_variant,intron_variant                                      |
| rs995685139 | intron_variant                                                                        |
| rs995696658 | genic_upstream_transcript_variant,intron_variant                                      |
| rs995699477 | intron_variant                                                                        |
| rs995750018 | intron_variant                                                                        |
| rs995768923 | genic_downstream_transcript_variant,intron_variant                                    |
| rs995775115 | genic_downstream_transcript_variant,intron_variant                                    |
| rs995778162 | intron_variant                                                                        |
| rs995789751 | genic_upstream_transcript_variant,intron_variant                                      |
| rs995802187 | intron_variant                                                                        |
| rs995813209 | genic_upstream_transcript_variant,intron_variant                                      |
| rs995830924 | genic_downstream_transcript_variant,intron_variant                                    |
| rs995831878 | intron_variant                                                                        |
| rs995841732 | intron_variant                                                                        |
| rs995853014 | intron_variant                                                                        |
| rs995858972 | genic_downstream_transcript_variant,intron_variant                                    |
| rs995876187 | genic_downstream_transcript_variant,intron_variant                                    |
| rs995928644 | genic_downstream_transcript_variant,intron_variant                                    |
| rs996007740 | intron_variant                                                                        |
| rs996089755 | intron_variant                                                                        |
| rs996116969 | intron_variant                                                                        |
| rs996122563 | genic_upstream_transcript_variant,intron_variant                                      |
| rs996130950 | genic_downstream_transcript_variant,intron_variant                                    |
| rs996151223 | intron_variant                                                                        |

|             |                                                                                                   |
|-------------|---------------------------------------------------------------------------------------------------|
| rs996183018 | genic_upstream_transcript_variant,intron_variant                                                  |
| rs996198269 | genic_upstream_transcript_variant,intron_variant                                                  |
| rs996232306 | 2KB_upstream_variant,genic_upstream_transcript_variant,upstream_transcript_variant,intron_variant |
| rs996243551 | 3_prime_UTR_variant,genic_downstream_transcript_variant,non_coding_transcript_variant             |
| rs996251973 | genic_downstream_transcript_variant,intron_variant                                                |
| rs996330199 | genic_upstream_transcript_variant,intron_variant                                                  |
| rs996352712 | intron_variant                                                                                    |
| rs996381912 | intron_variant                                                                                    |
| rs996421480 | genic_upstream_transcript_variant,intron_variant                                                  |
| rs996447836 | intron_variant                                                                                    |
| rs996482112 | genic_downstream_transcript_variant,intron_variant                                                |
| rs996484697 | intron_variant                                                                                    |
| rs996492493 | genic_upstream_transcript_variant,intron_variant                                                  |
| rs996523401 | intron_variant                                                                                    |
| rs996524422 | genic_downstream_transcript_variant,intron_variant                                                |
| rs996529473 | genic_upstream_transcript_variant,intron_variant                                                  |
| rs996567812 | genic_downstream_transcript_variant,intron_variant                                                |
| rs996580734 | 3_prime_UTR_variant,genic_downstream_transcript_variant,non_coding_transcript_variant             |
| rs996584253 | genic_upstream_transcript_variant,intron_variant                                                  |
| rs996606183 | genic_upstream_transcript_variant,intron_variant                                                  |
| rs996643070 | intron_variant                                                                                    |
| rs996661930 | genic_upstream_transcript_variant,intron_variant                                                  |
| rs996754212 | intron_variant                                                                                    |
| rs996807036 | genic_downstream_transcript_variant,intron_variant                                                |
| rs996828941 | genic_upstream_transcript_variant,intron_variant                                                  |
| rs996857540 | genic_upstream_transcript_variant,intron_variant                                                  |
| rs996861682 | genic_upstream_transcript_variant,intron_variant                                                  |
| rs996866475 | genic_upstream_transcript_variant,intron_variant                                                  |
| rs996893026 | genic_upstream_transcript_variant,intron_variant                                                  |
| rs996914753 | intron_variant                                                                                    |
| rs996960750 | genic_upstream_transcript_variant,intron_variant                                                  |
| rs996964651 | genic_downstream_transcript_variant,intron_variant                                                |
| rs996968225 | genic_downstream_transcript_variant,intron_variant                                                |
| rs996982807 | intron_variant                                                                                    |
| rs996990653 | intron_variant                                                                                    |
| rs996999672 | genic_upstream_transcript_variant,intron_variant                                                  |
| rs997042787 | genic_upstream_transcript_variant,intron_variant                                                  |
| rs997075615 | intron_variant                                                                                    |
| rs997118055 | intron_variant                                                                                    |
| rs997122000 | genic_upstream_transcript_variant,intron_variant                                                  |
| rs997123488 | intron_variant                                                                                    |
| rs997165841 | genic_upstream_transcript_variant,intron_variant                                                  |
| rs997184113 | genic_upstream_transcript_variant,intron_variant                                                  |
| rs997216554 | intron_variant                                                                                    |
| rs997246245 | genic_upstream_transcript_variant,intron_variant                                                  |
| rs997315113 | genic_upstream_transcript_variant,intron_variant                                                  |
| rs997315169 | intron_variant                                                                                    |
| rs997317328 | genic_upstream_transcript_variant,intron_variant                                                  |
| rs997343275 | genic_downstream_transcript_variant,intron_variant                                                |
| rs997362224 | intron_variant                                                                                    |
| rs997382443 | intron_variant                                                                                    |
| rs997395862 | genic_downstream_transcript_variant,intron_variant                                                |
| rs997447943 | genic_downstream_transcript_variant,intron_variant                                                |
| rs997454064 | intron_variant                                                                                    |
| rs997472553 | genic_upstream_transcript_variant,intron_variant                                                  |
| rs997476737 | genic_upstream_transcript_variant,intron_variant                                                  |
| rs997506424 | intron_variant                                                                                    |
| rs997551849 | genic_upstream_transcript_variant,intron_variant                                                  |
| rs997578626 | 2KB_upstream_variant,genic_upstream_transcript_variant,upstream_transcript_variant,intron_variant |
| rs997587482 | intron_variant                                                                                    |
| rs997591983 | genic_upstream_transcript_variant,intron_variant                                                  |
| rs997625508 | genic_upstream_transcript_variant,intron_variant                                                  |
| rs997716772 | genic_upstream_transcript_variant,intron_variant                                                  |
| rs997755332 | intron_variant                                                                                    |
| rs997767223 | intron_variant                                                                                    |
| rs997826108 | genic_downstream_transcript_variant,intron_variant                                                |
| rs997843036 | intron_variant                                                                                    |
| rs997892243 | genic_upstream_transcript_variant,intron_variant                                                  |
| rs997892556 | genic_downstream_transcript_variant,intron_variant                                                |
| rs997923925 | intron_variant                                                                                    |
| rs998002711 | genic_upstream_transcript_variant,intron_variant                                                  |
| rs998004041 | genic_upstream_transcript_variant,intron_variant                                                  |
| rs998023570 | intron_variant                                                                                    |
| rs998027346 | intron_variant,upstream_transcript_variant,genic_upstream_transcript_variant,5_prime_UTR_variant  |

|             |                                                                                                    |
|-------------|----------------------------------------------------------------------------------------------------|
| rs998068389 | intron_variant                                                                                     |
| rs998089560 | intron_variant                                                                                     |
| rs998090462 | 2KB_upstream_variant,genic_upstream_transcript_variant,upstream_transcript_variant,intron_variant  |
| rs998124540 | genic_upstream_transcript_variant,intron_variant                                                   |
| rs998132952 | intron_variant                                                                                     |
| rs998187776 | 2KB_upstream_variant,genic_upstream_transcript_variant,upstream_transcript_variant,intron_variant  |
| rs998212506 | genic_downstream_transcript_variant,intron_variant                                                 |
| rs998262576 | genic_downstream_transcript_variant,intron_variant                                                 |
| rs998273280 | genic_upstream_transcript_variant,intron_variant                                                   |
| rs998294531 | 2KB_upstream_variant,genic_upstream_transcript_variant,upstream_transcript_variant,intron_variant  |
| rs998314916 | genic_downstream_transcript_variant,intron_variant                                                 |
| rs998341570 | intron_variant                                                                                     |
| rs998353995 | genic_upstream_transcript_variant,intron_variant                                                   |
| rs998373028 | genic_downstream_transcript_variant,intron_variant                                                 |
| rs998383872 | intron_variant                                                                                     |
| rs998393632 | intron_variant                                                                                     |
| rs998440362 | intron_variant                                                                                     |
| rs998442672 | intron_variant                                                                                     |
| rs998448005 | genic_upstream_transcript_variant,intron_variant                                                   |
| rs998456907 | intron_variant,non_coding_transcript_variant,genic_upstream_transcript_variant,5_prime_UTR_variant |
| rs998467231 | genic_downstream_transcript_variant,intron_variant                                                 |
| rs998485529 | genic_downstream_transcript_variant,intron_variant                                                 |
| rs998496104 | intron_variant                                                                                     |
| rs998498355 | genic_downstream_transcript_variant,intron_variant                                                 |
| rs998512918 | genic_upstream_transcript_variant,intron_variant                                                   |
| rs998529969 | intron_variant                                                                                     |
| rs998575479 | genic_downstream_transcript_variant,intron_variant                                                 |
| rs998593126 | intron_variant                                                                                     |
| rs998615785 | 2KB_upstream_variant,genic_upstream_transcript_variant,upstream_transcript_variant,intron_variant  |
| rs998666387 | intron_variant                                                                                     |
| rs998696664 | genic_downstream_transcript_variant,intron_variant                                                 |
| rs998700394 | genic_upstream_transcript_variant,intron_variant                                                   |
| rs998722895 | genic_upstream_transcript_variant,intron_variant                                                   |
| rs998731382 | genic_upstream_transcript_variant,intron_variant                                                   |
| rs998746785 | intron_variant                                                                                     |
| rs998755745 | upstream_transcript_variant,genic_upstream_transcript_variant,intron_variant                       |
| rs998768435 | intron_variant                                                                                     |
| rs998813064 | genic_downstream_transcript_variant,intron_variant                                                 |
| rs998815828 | genic_downstream_transcript_variant,intron_variant                                                 |
| rs998839828 | genic_downstream_transcript_variant,intron_variant                                                 |
| rs998840021 | genic_upstream_transcript_variant,intron_variant                                                   |
| rs998874309 | genic_upstream_transcript_variant,intron_variant                                                   |
| rs998894755 | intron_variant                                                                                     |
| rs998902975 | intron_variant                                                                                     |
| rs998904013 | intron_variant                                                                                     |
| rs998912061 | genic_upstream_transcript_variant,intron_variant                                                   |
| rs998917673 | genic_upstream_transcript_variant,intron_variant                                                   |
| rs998964185 | intron_variant                                                                                     |
| rs998990154 | 2KB_upstream_variant,genic_upstream_transcript_variant,upstream_transcript_variant,intron_variant  |
| rs999016283 | intron_variant                                                                                     |
| rs999022239 | genic_upstream_transcript_variant,intron_variant                                                   |
| rs999048739 | intron_variant                                                                                     |
| rs999061741 | intron_variant                                                                                     |
| rs999092620 | intron_variant                                                                                     |
| rs999098207 | genic_upstream_transcript_variant,intron_variant                                                   |
| rs999107986 | genic_downstream_transcript_variant,intron_variant                                                 |
| rs999109183 | genic_upstream_transcript_variant,intron_variant                                                   |
| rs999151222 | genic_downstream_transcript_variant,intron_variant                                                 |
| rs999248584 | genic_upstream_transcript_variant,intron_variant                                                   |
| rs999286870 | intron_variant                                                                                     |
| rs999342085 | intron_variant                                                                                     |
| rs999362705 | intron_variant                                                                                     |
| rs999385495 | intron_variant                                                                                     |
| rs999406265 | genic_upstream_transcript_variant,intron_variant                                                   |
| rs999436100 | intron_variant                                                                                     |
| rs999468563 | genic_upstream_transcript_variant,intron_variant                                                   |
| rs999471313 | genic_upstream_transcript_variant,intron_variant                                                   |
| rs999496385 | intron_variant                                                                                     |
| rs999514613 | genic_downstream_transcript_variant,intron_variant                                                 |
| rs999527755 | genic_upstream_transcript_variant,intron_variant                                                   |
| rs999606436 | intron_variant                                                                                     |
| rs999617615 | intron_variant                                                                                     |
| rs999636479 | intron_variant                                                                                     |
| rs999661433 | genic_upstream_transcript_variant,intron_variant                                                   |

|              |                                                                                       |
|--------------|---------------------------------------------------------------------------------------|
| rs999693978  | genic_upstream_transcript_variant,intron_variant                                      |
| rs999719585  | intron_variant                                                                        |
| rs999752887  | genic_upstream_transcript_variant,intron_variant                                      |
| rs999758797  | genic_upstream_transcript_variant,intron_variant                                      |
| rs999796429  | genic_upstream_transcript_variant,intron_variant                                      |
| rs999801684  | genic_upstream_transcript_variant,intron_variant                                      |
| rs999807091  | genic_upstream_transcript_variant,intron_variant                                      |
| rs999841620  | genic_downstream_transcript_variant,intron_variant                                    |
| rs999848531  | genic_upstream_transcript_variant,intron_variant                                      |
| rs999914600  | genic_upstream_transcript_variant,intron_variant                                      |
| rs999944341  | genic_downstream_transcript_variant,intron_variant                                    |
| rs999986628  | genic_upstream_transcript_variant,intron_variant                                      |
| rs100009944  | intron_variant                                                                        |
| rs1000044357 | genic_downstream_transcript_variant,intron_variant                                    |
| rs1000047140 | genic_downstream_transcript_variant,intron_variant                                    |
| rs1000053326 | intron_variant                                                                        |
| rs1000070601 | genic_upstream_transcript_variant,intron_variant                                      |
| rs1000114390 | genic_downstream_transcript_variant,intron_variant                                    |
| rs1000183177 | genic_upstream_transcript_variant,intron_variant                                      |
| rs1000206092 | genic_downstream_transcript_variant,intron_variant                                    |
| rs1000211667 | genic_upstream_transcript_variant,intron_variant                                      |
| rs1000216862 | intron_variant                                                                        |
| rs1000238085 | intron_variant                                                                        |
| rs1000278836 | genic_downstream_transcript_variant,intron_variant                                    |
| rs1000279027 | genic_downstream_transcript_variant,intron_variant                                    |
| rs1000302339 | intron_variant                                                                        |
| rs1000317282 | genic_upstream_transcript_variant,intron_variant                                      |
| rs1000337119 | upstream_transcript_variant,genic_upstream_transcript_variant,intron_variant          |
| rs1000499252 | intron_variant                                                                        |
| rs1000499771 | genic_downstream_transcript_variant,downstream_transcript_variant,intron_variant      |
| rs1000523804 | genic_upstream_transcript_variant,intron_variant                                      |
| rs1000543705 | genic_downstream_transcript_variant,intron_variant                                    |
| rs1000562570 | genic_downstream_transcript_variant,intron_variant                                    |
| rs1000596234 | intron_variant                                                                        |
| rs1000679280 | genic_upstream_transcript_variant,intron_variant                                      |
| rs1000711011 | genic_downstream_transcript_variant,intron_variant                                    |
| rs1000721472 | genic_upstream_transcript_variant,intron_variant                                      |
| rs1000748102 | intron_variant                                                                        |
| rs1000754117 | genic_upstream_transcript_variant,intron_variant                                      |
| rs1000816776 | genic_upstream_transcript_variant,intron_variant                                      |
| rs1000824515 | genic_upstream_transcript_variant,intron_variant                                      |
| rs1000874165 | genic_upstream_transcript_variant,intron_variant                                      |
| rs1000883062 | intron_variant                                                                        |
| rs1000920418 | genic_upstream_transcript_variant,intron_variant                                      |
| rs1000933222 | intron_variant                                                                        |
| rs1000949734 | genic_upstream_transcript_variant,intron_variant                                      |
| rs1000953077 | intron_variant                                                                        |
| rs1000973009 | genic_upstream_transcript_variant,intron_variant                                      |
| rs1000981999 | genic_upstream_transcript_variant,intron_variant                                      |
| rs1001071336 | genic_upstream_transcript_variant,intron_variant                                      |
| rs1001140887 | intron_variant,genic_upstream_transcript_variant                                      |
| rs1001163976 | intron_variant                                                                        |
| rs1001191474 | intron_variant,genic_upstream_transcript_variant                                      |
| rs1001193997 | genic_downstream_transcript_variant,intron_variant                                    |
| rs1001197590 | upstream_transcript_variant,intron_variant,genic_upstream_transcript_variant          |
| rs1001299939 | intron_variant                                                                        |
| rs1001306594 | intron_variant                                                                        |
| rs1001317171 | genic_downstream_transcript_variant,intron_variant                                    |
| rs1001349628 | intron_variant                                                                        |
| rs1001362196 | genic_downstream_transcript_variant,intron_variant                                    |
| rs1001371751 | 3_prime_UTR_variant,genic_downstream_transcript_variant,non_coding_transcript_variant |
| rs1001378562 | intron_variant,genic_upstream_transcript_variant                                      |
| rs1001401932 | intron_variant                                                                        |
| rs1001442050 | intron_variant                                                                        |
| rs1001444582 | intron_variant,genic_upstream_transcript_variant                                      |
| rs1001466539 | intron_variant,genic_upstream_transcript_variant                                      |
| rs1001529661 | intron_variant,genic_upstream_transcript_variant                                      |
| rs1001541938 | genic_downstream_transcript_variant,intron_variant                                    |
| rs1001569367 | intron_variant                                                                        |
| rs1001610722 | intron_variant                                                                        |
| rs1001620551 | intron_variant                                                                        |
| rs1001624251 | genic_downstream_transcript_variant,intron_variant                                    |
| rs1001657793 | intron_variant,genic_upstream_transcript_variant                                      |
| rs1001662026 | intron_variant,genic_upstream_transcript_variant                                      |

|              |                                                                                                                         |
|--------------|-------------------------------------------------------------------------------------------------------------------------|
| rs1001700956 | intron_variant                                                                                                          |
| rs1001730845 | intron_variant                                                                                                          |
| rs1001759760 | intron_variant,genic_upstream_transcript_variant                                                                        |
| rs1001760551 | intron_variant                                                                                                          |
| rs1001791621 | intron_variant                                                                                                          |
| rs1001811893 | upstream_transcript_variant,intron_variant,2KB_upstream_variant,genic_upstream_transcript_variant                       |
| rs1001834380 | genic_downstream_transcript_variant,intron_variant                                                                      |
| rs1001871525 | intron_variant,genic_upstream_transcript_variant                                                                        |
| rs1001949722 | intron_variant                                                                                                          |
| rs1001952714 | intron_variant                                                                                                          |
| rs1001958761 | intron_variant,genic_upstream_transcript_variant                                                                        |
| rs1001974556 | downstream_transcript_variant,intron_variant,genic_downstream_transcript_variant                                        |
| rs1002015914 | intron_variant                                                                                                          |
| rs1002027875 | intron_variant                                                                                                          |
| rs1002041305 | genic_downstream_transcript_variant,intron_variant                                                                      |
| rs1002046814 | intron_variant                                                                                                          |
| rs1002054002 | intron_variant,genic_upstream_transcript_variant                                                                        |
| rs1002071725 | intron_variant                                                                                                          |
| rs1002074309 | intron_variant,genic_upstream_transcript_variant                                                                        |
| rs1002079430 | intron_variant                                                                                                          |
| rs1002180885 | genic_downstream_transcript_variant,intron_variant                                                                      |
| rs1002211508 | intron_variant                                                                                                          |
| rs1002211935 | genic_downstream_transcript_variant,intron_variant                                                                      |
| rs1002248049 | intron_variant                                                                                                          |
| rs1002286461 | non_coding_transcript_variant,intron_variant,genic_upstream_transcript_variant,missense_variant,coding_sequence_variant |
| rs1002299810 | upstream_transcript_variant,intron_variant,2KB_upstream_variant,genic_upstream_transcript_variant                       |
| rs1002318757 | intron_variant                                                                                                          |
| rs1002319778 | intron_variant,genic_upstream_transcript_variant                                                                        |
| rs1002344800 | downstream_transcript_variant,intron_variant,genic_downstream_transcript_variant                                        |
| rs1002378785 | intron_variant,genic_upstream_transcript_variant                                                                        |
| rs1002399843 | intron_variant,genic_upstream_transcript_variant                                                                        |
| rs1002428573 | intron_variant,genic_upstream_transcript_variant                                                                        |
| rs1002449966 | genic_downstream_transcript_variant,intron_variant                                                                      |
| rs1002455394 | 3_prime_UTR_variant,genic_downstream_transcript_variant,non_coding_transcript_variant                                   |
| rs1002492806 | intron_variant                                                                                                          |
| rs1002507339 | intron_variant,genic_upstream_transcript_variant                                                                        |
| rs1002527375 | intron_variant,genic_upstream_transcript_variant                                                                        |
| rs1002546705 | genic_downstream_transcript_variant,intron_variant                                                                      |
| rs1002549466 | intron_variant,genic_upstream_transcript_variant                                                                        |
| rs1002580125 | intron_variant                                                                                                          |
| rs1002609864 | intron_variant                                                                                                          |
| rs1002620381 | intron_variant                                                                                                          |
| rs1002677132 | upstream_transcript_variant,intron_variant,2KB_upstream_variant,genic_upstream_transcript_variant                       |
| rs1002721456 | upstream_transcript_variant,intron_variant,2KB_upstream_variant,genic_upstream_transcript_variant                       |
| rs1002731933 | intron_variant,genic_upstream_transcript_variant                                                                        |
| rs1002741309 | intron_variant                                                                                                          |
| rs1002758853 | genic_downstream_transcript_variant,intron_variant                                                                      |
| rs1002793749 | 3_prime_UTR_variant,genic_downstream_transcript_variant,non_coding_transcript_variant                                   |
| rs1002822713 | genic_downstream_transcript_variant,intron_variant                                                                      |
| rs1002835268 | intron_variant                                                                                                          |
| rs1002850794 | intron_variant                                                                                                          |
| rs1002869137 | genic_downstream_transcript_variant,intron_variant                                                                      |
| rs1002881270 | intron_variant                                                                                                          |
| rs1002884026 | intron_variant,genic_upstream_transcript_variant                                                                        |
| rs1002940599 | intron_variant                                                                                                          |
| rs1002969531 | intron_variant,genic_upstream_transcript_variant                                                                        |
| rs1002978484 | intron_variant                                                                                                          |
| rs1003013474 | intron_variant                                                                                                          |
| rs1003071421 | intron_variant,genic_upstream_transcript_variant                                                                        |
| rs1003101252 | genic_downstream_transcript_variant,intron_variant                                                                      |
| rs1003118216 | intron_variant,genic_upstream_transcript_variant                                                                        |
| rs1003131579 | upstream_transcript_variant,intron_variant,2KB_upstream_variant,genic_upstream_transcript_variant                       |
| rs1003165324 | genic_downstream_transcript_variant,intron_variant                                                                      |
| rs1003168327 | intron_variant                                                                                                          |
| rs1003202294 | downstream_transcript_variant,500B_downstream_variant                                                                   |
| rs1003213873 | intron_variant,genic_upstream_transcript_variant                                                                        |
| rs1003217071 | intron_variant,genic_upstream_transcript_variant                                                                        |
| rs1003272984 | intron_variant,genic_upstream_transcript_variant                                                                        |
| rs1003344393 | intron_variant                                                                                                          |
| rs1003376924 | downstream_transcript_variant,intron_variant,genic_downstream_transcript_variant                                        |
| rs1003393893 | genic_downstream_transcript_variant,intron_variant                                                                      |
| rs1003435890 | genic_downstream_transcript_variant,intron_variant                                                                      |
| rs1003438588 | genic_downstream_transcript_variant,intron_variant                                                                      |
| rs1003451205 | intron_variant                                                                                                          |

|              |                                                                                                   |
|--------------|---------------------------------------------------------------------------------------------------|
| rs1003454294 | intron_variant,genic_upstream_transcript_variant                                                  |
| rs1003483466 | intron_variant,genic_upstream_transcript_variant                                                  |
| rs1003499444 | genic_downstream_transcript_variant,intron_variant                                                |
| rs1003541452 | intron_variant,genic_upstream_transcript_variant                                                  |
| rs1003608007 | upstream_transcript_variant,intron_variant,2KB_upstream_variant,genic_upstream_transcript_variant |
| rs1003623437 | intron_variant                                                                                    |
| rs1003696060 | intron_variant                                                                                    |
| rs1003706270 | intron_variant,genic_upstream_transcript_variant                                                  |
| rs1003715756 | intron_variant,genic_upstream_transcript_variant                                                  |
| rs1003727088 | intron_variant,genic_upstream_transcript_variant                                                  |
| rs1003739705 | intron_variant,genic_upstream_transcript_variant                                                  |
| rs1003745298 | downstream_transcript_variant,500B_downstream_variant                                             |
| rs1003746064 | intron_variant,genic_upstream_transcript_variant                                                  |
| rs1003831301 | genic_downstream_transcript_variant,intron_variant                                                |
| rs1003841607 | downstream_transcript_variant,intron_variant,genic_downstream_transcript_variant                  |
| rs1003853735 | intron_variant,genic_upstream_transcript_variant                                                  |
| rs1003879784 | genic_downstream_transcript_variant,intron_variant                                                |
| rs1003903164 | intron_variant                                                                                    |
| rs1003954947 | intron_variant                                                                                    |
| rs1003971285 | intron_variant                                                                                    |
| rs1003981633 | upstream_transcript_variant,intron_variant,2KB_upstream_variant,genic_upstream_transcript_variant |
| rs1004022625 | intron_variant                                                                                    |
| rs1004043921 | intron_variant                                                                                    |
| rs1004077253 | intron_variant,genic_upstream_transcript_variant                                                  |
| rs1004120708 | intron_variant,genic_upstream_transcript_variant                                                  |
| rs1004131526 | intron_variant,genic_upstream_transcript_variant                                                  |
| rs1004149775 | intron_variant,genic_upstream_transcript_variant                                                  |
| rs1004149789 | genic_downstream_transcript_variant,intron_variant                                                |
| rs1004173170 | intron_variant,genic_upstream_transcript_variant                                                  |
| rs1004182013 | intron_variant                                                                                    |
| rs1004208029 | upstream_transcript_variant,intron_variant,2KB_upstream_variant,genic_upstream_transcript_variant |
| rs1004216014 | genic_downstream_transcript_variant,intron_variant                                                |
| rs1004260803 | intron_variant,genic_upstream_transcript_variant                                                  |
| rs1004260943 | intron_variant                                                                                    |
| rs1004273183 | intron_variant,genic_upstream_transcript_variant                                                  |
| rs1004304246 | intron_variant                                                                                    |
| rs1004304562 | upstream_transcript_variant,intron_variant,2KB_upstream_variant,genic_upstream_transcript_variant |
| rs1004381109 | intron_variant,genic_upstream_transcript_variant                                                  |
| rs1004428230 | intron_variant                                                                                    |
| rs1004457665 | intron_variant,genic_upstream_transcript_variant                                                  |
| rs1004463767 | intron_variant                                                                                    |
| rs1004488036 | intron_variant                                                                                    |
| rs1004503190 | intron_variant,genic_upstream_transcript_variant                                                  |
| rs1004532112 | genic_downstream_transcript_variant,intron_variant                                                |
| rs1004541337 | intron_variant,genic_upstream_transcript_variant                                                  |
| rs1004574017 | genic_downstream_transcript_variant,intron_variant                                                |
| rs1004606812 | intron_variant,genic_upstream_transcript_variant                                                  |
| rs1004633827 | genic_downstream_transcript_variant,intron_variant                                                |
| rs1004649513 | intron_variant                                                                                    |
| rs1004653463 | intron_variant                                                                                    |
| rs1004673037 | intron_variant                                                                                    |
| rs1004675623 | genic_downstream_transcript_variant,intron_variant                                                |
| rs1004690545 | intron_variant                                                                                    |
| rs1004699006 | intron_variant,genic_upstream_transcript_variant                                                  |
| rs1004708799 | genic_downstream_transcript_variant,intron_variant                                                |
| rs1004722383 | intron_variant                                                                                    |
| rs1004743627 | intron_variant                                                                                    |
| rs1004764037 | intron_variant                                                                                    |
| rs1004771606 | intron_variant,genic_upstream_transcript_variant                                                  |
| rs1004774947 | genic_downstream_transcript_variant,intron_variant                                                |
| rs1004826950 | intron_variant                                                                                    |
| rs1004831614 | genic_downstream_transcript_variant,intron_variant                                                |
| rs1004880414 | intron_variant,genic_upstream_transcript_variant                                                  |
| rs1004890065 | intron_variant,genic_upstream_transcript_variant                                                  |
| rs1004894408 | intron_variant                                                                                    |
| rs1000044357 | genic_downstream_transcript_variant,intron_variant                                                |
| rs1000047140 | genic_downstream_transcript_variant,intron_variant                                                |
| rs1000053326 | intron_variant                                                                                    |
| rs1000070601 | genic_upstream_transcript_variant,intron_variant                                                  |
| rs1000114390 | genic_downstream_transcript_variant,intron_variant                                                |
| rs1000183177 | genic_upstream_transcript_variant,intron_variant                                                  |
| rs1000206092 | genic_downstream_transcript_variant,intron_variant                                                |
| rs1000211667 | genic_upstream_transcript_variant,intron_variant                                                  |
| rs1000216862 | intron_variant                                                                                    |

|              |                                                                                                   |
|--------------|---------------------------------------------------------------------------------------------------|
| rs1000238085 | intron_variant                                                                                    |
| rs1000278836 | genic_downstream_transcript_variant,intron_variant                                                |
| rs1000279027 | genic_downstream_transcript_variant,intron_variant                                                |
| rs1000302339 | intron_variant                                                                                    |
| rs1000317282 | genic_upstream_transcript_variant,intron_variant                                                  |
| rs1000337119 | upstream_transcript_variant,genic_upstream_transcript_variant,intron_variant                      |
| rs1000499252 | intron_variant                                                                                    |
| rs1000499771 | genic_downstream_transcript_variant,downstream_transcript_variant,intron_variant                  |
| rs1000523804 | genic_upstream_transcript_variant,intron_variant                                                  |
| rs1000543705 | genic_downstream_transcript_variant,intron_variant                                                |
| rs1000562570 | genic_downstream_transcript_variant,intron_variant                                                |
| rs1000596234 | intron_variant                                                                                    |
| rs1000679280 | genic_upstream_transcript_variant,intron_variant                                                  |
| rs1000711011 | genic_downstream_transcript_variant,intron_variant                                                |
| rs1000721472 | genic_upstream_transcript_variant,intron_variant                                                  |
| rs1000748102 | intron_variant                                                                                    |
| rs1000754117 | genic_upstream_transcript_variant,intron_variant                                                  |
| rs1000816776 | genic_upstream_transcript_variant,intron_variant                                                  |
| rs1000824515 | genic_upstream_transcript_variant,intron_variant                                                  |
| rs1000874165 | genic_upstream_transcript_variant,intron_variant                                                  |
| rs1000883062 | intron_variant                                                                                    |
| rs1000920418 | genic_upstream_transcript_variant,intron_variant                                                  |
| rs1000933222 | intron_variant                                                                                    |
| rs1000949734 | genic_upstream_transcript_variant,intron_variant                                                  |
| rs1000953077 | intron_variant                                                                                    |
| rs1000973009 | genic_upstream_transcript_variant,intron_variant                                                  |
| rs1000981999 | genic_upstream_transcript_variant,intron_variant                                                  |
| rs1001071336 | genic_upstream_transcript_variant,intron_variant                                                  |
| rs1001140887 | intron_variant,genic_upstream_transcript_variant                                                  |
| rs1001163976 | intron_variant                                                                                    |
| rs1001191474 | intron_variant,genic_upstream_transcript_variant                                                  |
| rs1001193997 | genic_downstream_transcript_variant,intron_variant                                                |
| rs1001197590 | upstream_transcript_variant,intron_variant,genic_upstream_transcript_variant                      |
| rs1001299939 | intron_variant                                                                                    |
| rs1001306594 | intron_variant                                                                                    |
| rs1001317171 | genic_downstream_transcript_variant,intron_variant                                                |
| rs1001349628 | intron_variant                                                                                    |
| rs1001362196 | genic_downstream_transcript_variant,intron_variant                                                |
| rs1001371751 | 3_prime_UTR_variant,genic_downstream_transcript_variant,non_coding_transcript_variant             |
| rs1001378562 | intron_variant,genic_upstream_transcript_variant                                                  |
| rs1001401932 | intron_variant                                                                                    |
| rs1001442050 | intron_variant                                                                                    |
| rs1001444582 | intron_variant,genic_upstream_transcript_variant                                                  |
| rs1001466539 | intron_variant,genic_upstream_transcript_variant                                                  |
| rs1001529661 | intron_variant,genic_upstream_transcript_variant                                                  |
| rs1001541938 | genic_downstream_transcript_variant,intron_variant                                                |
| rs1001569367 | intron_variant                                                                                    |
| rs1001610722 | intron_variant                                                                                    |
| rs1001620551 | intron_variant                                                                                    |
| rs1001624251 | genic_downstream_transcript_variant,intron_variant                                                |
| rs1001657793 | intron_variant,genic_upstream_transcript_variant                                                  |
| rs1001662026 | intron_variant,genic_upstream_transcript_variant                                                  |
| rs1001700956 | intron_variant                                                                                    |
| rs1001730845 | intron_variant                                                                                    |
| rs1001759760 | intron_variant,genic_upstream_transcript_variant                                                  |
| rs1001760551 | intron_variant                                                                                    |
| rs1001791621 | intron_variant                                                                                    |
| rs1001811893 | upstream_transcript_variant,intron_variant,2KB_upstream_variant,genic_upstream_transcript_variant |
| rs1001834380 | genic_downstream_transcript_variant,intron_variant                                                |
| rs1001871525 | intron_variant,genic_upstream_transcript_variant                                                  |
| rs1001949722 | intron_variant                                                                                    |
| rs1001952714 | intron_variant                                                                                    |
| rs1001958761 | intron_variant,genic_upstream_transcript_variant                                                  |
| rs1001974556 | downstream_transcript_variant,intron_variant,genic_downstream_transcript_variant                  |
| rs1002015914 | intron_variant                                                                                    |
| rs1002027875 | intron_variant                                                                                    |
| rs1002041305 | genic_downstream_transcript_variant,intron_variant                                                |
| rs1002046814 | intron_variant                                                                                    |
| rs1002054002 | intron_variant,genic_upstream_transcript_variant                                                  |
| rs1002071725 | intron_variant                                                                                    |
| rs1002074309 | intron_variant,genic_upstream_transcript_variant                                                  |
| rs1002079430 | intron_variant                                                                                    |
| rs1002180885 | genic_downstream_transcript_variant,intron_variant                                                |
| rs1002211508 | intron_variant                                                                                    |

|              |                                                                                                                         |
|--------------|-------------------------------------------------------------------------------------------------------------------------|
| rs1002211935 | genic_downstream_transcript_variant,intron_variant                                                                      |
| rs1002248049 | intron_variant                                                                                                          |
| rs1002286461 | non_coding_transcript_variant,intron_variant,genic_upstream_transcript_variant,missense_variant,coding_sequence_variant |
| rs1002299810 | upstream_transcript_variant,intron_variant,2KB_upstream_variant,genic_upstream_transcript_variant                       |
| rs1002318757 | intron_variant                                                                                                          |
| rs1002319778 | intron_variant,genic_upstream_transcript_variant                                                                        |
| rs1002344800 | downstream_transcript_variant,intron_variant,genic_downstream_transcript_variant                                        |
| rs1002378785 | intron_variant,genic_upstream_transcript_variant                                                                        |
| rs1002399843 | intron_variant,genic_upstream_transcript_variant                                                                        |
| rs1002428573 | intron_variant,genic_upstream_transcript_variant                                                                        |
| rs1002449966 | genic_downstream_transcript_variant,intron_variant                                                                      |
| rs1002455394 | 3_prime_UTR_variant,genic_downstream_transcript_variant,non_coding_transcript_variant                                   |
| rs1002492806 | intron_variant                                                                                                          |
| rs1002507339 | intron_variant,genic_upstream_transcript_variant                                                                        |
| rs1002527375 | intron_variant,genic_upstream_transcript_variant                                                                        |
| rs1002546705 | genic_downstream_transcript_variant,intron_variant                                                                      |
| rs1002549466 | intron_variant,genic_upstream_transcript_variant                                                                        |
| rs1002580125 | intron_variant                                                                                                          |
| rs1002609864 | intron_variant                                                                                                          |
| rs1002620381 | intron_variant                                                                                                          |
| rs1002677132 | upstream_transcript_variant,intron_variant,2KB_upstream_variant,genic_upstream_transcript_variant                       |
| rs1002721456 | upstream_transcript_variant,intron_variant,2KB_upstream_variant,genic_upstream_transcript_variant                       |
| rs1002731933 | intron_variant,genic_upstream_transcript_variant                                                                        |
| rs1002741309 | intron_variant                                                                                                          |
| rs1002758853 | genic_downstream_transcript_variant,intron_variant                                                                      |
| rs1002793749 | 3_prime_UTR_variant,genic_downstream_transcript_variant,non_coding_transcript_variant                                   |
| rs1002822713 | genic_downstream_transcript_variant,intron_variant                                                                      |
| rs1002835268 | intron_variant                                                                                                          |
| rs1002850794 | intron_variant                                                                                                          |
| rs1002869137 | genic_downstream_transcript_variant,intron_variant                                                                      |
| rs1002881270 | intron_variant                                                                                                          |
| rs1002884026 | intron_variant,genic_upstream_transcript_variant                                                                        |
| rs1002940599 | intron_variant                                                                                                          |
| rs1002969531 | intron_variant,genic_upstream_transcript_variant                                                                        |
| rs1002978484 | intron_variant                                                                                                          |
| rs1003013474 | intron_variant                                                                                                          |
| rs1003071421 | intron_variant,genic_upstream_transcript_variant                                                                        |
| rs1003101252 | genic_downstream_transcript_variant,intron_variant                                                                      |
| rs1003118216 | intron_variant,genic_upstream_transcript_variant                                                                        |
| rs1003131579 | upstream_transcript_variant,intron_variant,2KB_upstream_variant,genic_upstream_transcript_variant                       |
| rs1003165324 | genic_downstream_transcript_variant,intron_variant                                                                      |
| rs1003168327 | intron_variant                                                                                                          |
| rs1003202294 | downstream_transcript_variant,intron_variant,500B_downstream_variant                                                    |
| rs1003213873 | intron_variant,genic_upstream_transcript_variant                                                                        |
| rs1003217071 | intron_variant,genic_upstream_transcript_variant                                                                        |
| rs1003272984 | intron_variant,genic_upstream_transcript_variant                                                                        |
| rs1003344393 | intron_variant                                                                                                          |
| rs1003376924 | downstream_transcript_variant,intron_variant,genic_downstream_transcript_variant                                        |
| rs1003393893 | genic_downstream_transcript_variant,intron_variant                                                                      |
| rs1003435890 | genic_downstream_transcript_variant,intron_variant                                                                      |
| rs1003438588 | genic_downstream_transcript_variant,intron_variant                                                                      |
| rs1003451205 | intron_variant                                                                                                          |
| rs1003454294 | intron_variant,genic_upstream_transcript_variant                                                                        |
| rs1003483466 | intron_variant,genic_upstream_transcript_variant                                                                        |
| rs1003499444 | genic_downstream_transcript_variant,intron_variant                                                                      |
| rs1003541452 | intron_variant,genic_upstream_transcript_variant                                                                        |
| rs1003608007 | upstream_transcript_variant,intron_variant,2KB_upstream_variant,genic_upstream_transcript_variant                       |
| rs1003623437 | intron_variant                                                                                                          |
| rs1003696060 | intron_variant                                                                                                          |
| rs1003706270 | intron_variant,genic_upstream_transcript_variant                                                                        |
| rs1003715756 | intron_variant,genic_upstream_transcript_variant                                                                        |
| rs1003727088 | intron_variant,genic_upstream_transcript_variant                                                                        |
| rs1003739705 | intron_variant,genic_upstream_transcript_variant                                                                        |
| rs1003745298 | downstream_transcript_variant,intron_variant,500B_downstream_variant                                                    |
| rs1003746064 | intron_variant,genic_upstream_transcript_variant                                                                        |
| rs1003831301 | genic_downstream_transcript_variant,intron_variant                                                                      |
| rs1003841607 | downstream_transcript_variant,intron_variant,genic_downstream_transcript_variant                                        |
| rs1003853735 | intron_variant,genic_upstream_transcript_variant                                                                        |
| rs1003879784 | genic_downstream_transcript_variant,intron_variant                                                                      |
| rs1003903164 | intron_variant                                                                                                          |
| rs1003954947 | intron_variant                                                                                                          |
| rs1003971285 | intron_variant                                                                                                          |
| rs1003981633 | upstream_transcript_variant,intron_variant,2KB_upstream_variant,genic_upstream_transcript_variant                       |
| rs1004022625 | intron_variant                                                                                                          |

|              |                                                                                                   |
|--------------|---------------------------------------------------------------------------------------------------|
| rs1004043921 | intron_variant                                                                                    |
| rs1004077253 | intron_variant,genic_upstream_transcript_variant                                                  |
| rs1004120708 | intron_variant,genic_upstream_transcript_variant                                                  |
| rs1004131526 | intron_variant,genic_upstream_transcript_variant                                                  |
| rs1004149775 | intron_variant,genic_upstream_transcript_variant                                                  |
| rs1004149789 | genic_downstream_transcript_variant,intron_variant                                                |
| rs1004173170 | intron_variant,genic_upstream_transcript_variant                                                  |
| rs1004182013 | intron_variant                                                                                    |
| rs1004208029 | upstream_transcript_variant,intron_variant,2KB_upstream_variant,genic_upstream_transcript_variant |
| rs1004216014 | genic_downstream_transcript_variant,intron_variant                                                |
| rs1004260803 | intron_variant,genic_upstream_transcript_variant                                                  |
| rs1004260943 | intron_variant                                                                                    |
| rs1004273183 | intron_variant,genic_upstream_transcript_variant                                                  |
| rs1004304246 | intron_variant                                                                                    |
| rs1004304562 | upstream_transcript_variant,intron_variant,2KB_upstream_variant,genic_upstream_transcript_variant |
| rs1004381109 | intron_variant,genic_upstream_transcript_variant                                                  |
| rs1004428230 | intron_variant                                                                                    |
| rs1004457665 | intron_variant,genic_upstream_transcript_variant                                                  |
| rs1004463767 | intron_variant                                                                                    |
| rs1004488036 | intron_variant                                                                                    |
| rs1004503190 | intron_variant,genic_upstream_transcript_variant                                                  |
| rs1004532112 | genic_downstream_transcript_variant,intron_variant                                                |
| rs1004541337 | intron_variant,genic_upstream_transcript_variant                                                  |
| rs1004574017 | genic_downstream_transcript_variant,intron_variant                                                |
| rs1004606812 | intron_variant,genic_upstream_transcript_variant                                                  |
| rs1004633827 | genic_downstream_transcript_variant,intron_variant                                                |
| rs1004649513 | intron_variant                                                                                    |
| rs1004653463 | intron_variant                                                                                    |
| rs1004673037 | intron_variant                                                                                    |
| rs1004675623 | genic_downstream_transcript_variant,intron_variant                                                |
| rs1004690545 | intron_variant                                                                                    |
| rs1004699006 | intron_variant,genic_upstream_transcript_variant                                                  |
| rs1004708799 | genic_downstream_transcript_variant,intron_variant                                                |
| rs1004722383 | intron_variant                                                                                    |
| rs1004743627 | intron_variant                                                                                    |
| rs1004764037 | intron_variant                                                                                    |
| rs1004771606 | intron_variant,genic_upstream_transcript_variant                                                  |
| rs1004774947 | genic_downstream_transcript_variant,intron_variant                                                |
| rs1004826950 | intron_variant                                                                                    |
| rs1004831614 | genic_downstream_transcript_variant,intron_variant                                                |
| rs1004880414 | intron_variant,genic_upstream_transcript_variant                                                  |
| rs1004890065 | intron_variant,genic_upstream_transcript_variant                                                  |
| rs1004894408 | intron_variant                                                                                    |
| rs1004902398 | genic_downstream_transcript_variant,intron_variant                                                |
| rs1004923221 | intron_variant                                                                                    |
| rs1004951980 | downstream_transcript_variant,500B_downstream_variant                                             |
| rs1004985867 | intron_variant                                                                                    |
| rs1004998523 | intron_variant,genic_upstream_transcript_variant                                                  |
| rs1005015974 | intron_variant,genic_upstream_transcript_variant                                                  |
| rs1005050156 | intron_variant,genic_upstream_transcript_variant                                                  |
| rs1005075293 | intron_variant                                                                                    |
| rs1005101174 | genic_downstream_transcript_variant,intron_variant                                                |
| rs1005114126 | intron_variant,genic_upstream_transcript_variant                                                  |
| rs1005147642 | intron_variant,genic_upstream_transcript_variant                                                  |
| rs1005164438 | intron_variant                                                                                    |
| rs1005165364 | genic_downstream_transcript_variant,intron_variant                                                |
| rs1005186384 | genic_downstream_transcript_variant,intron_variant                                                |
| rs1005218402 | intron_variant,genic_upstream_transcript_variant                                                  |
| rs1005237724 | genic_downstream_transcript_variant,intron_variant                                                |
| rs1005299629 | genic_downstream_transcript_variant,intron_variant                                                |
| rs1005305956 | intron_variant                                                                                    |
| rs1005311855 | intron_variant,genic_upstream_transcript_variant                                                  |
| rs1005326196 | intron_variant                                                                                    |
| rs1005340200 | intron_variant                                                                                    |
| rs1005347455 | intron_variant                                                                                    |
| rs1005352986 | intron_variant                                                                                    |
| rs1005370380 | intron_variant,genic_upstream_transcript_variant                                                  |
| rs1005411331 | upstream_transcript_variant,intron_variant,2KB_upstream_variant,genic_upstream_transcript_variant |
| rs1005422014 | intron_variant                                                                                    |
| rs1005443808 | upstream_transcript_variant,intron_variant,5_prime_UTR_variant,genic_upstream_transcript_variant  |
| rs1005490088 | genic_downstream_transcript_variant,intron_variant                                                |
| rs1005495774 | intron_variant,genic_upstream_transcript_variant                                                  |
| rs1005508459 | genic_downstream_transcript_variant,intron_variant                                                |
| rs1005526171 | intron_variant                                                                                    |

|              |                                                                                                   |
|--------------|---------------------------------------------------------------------------------------------------|
| rs1005531673 | intron_variant                                                                                    |
| rs1005589987 | intron_variant,genic_upstream_transcript_variant                                                  |
| rs1005619742 | intron_variant,genic_upstream_transcript_variant                                                  |
| rs1005623053 | intron_variant                                                                                    |
| rs1005633745 | intron_variant,genic_upstream_transcript_variant                                                  |
| rs1005660390 | upstream_transcript_variant,intron_variant,2KB_upstream_variant,genic_upstream_transcript_variant |
| rs1005689946 | intron_variant,genic_upstream_transcript_variant                                                  |
| rs1005704149 | intron_variant                                                                                    |
| rs1005732608 | intron_variant                                                                                    |
| rs1005767028 | genic_downstream_transcript_variant,intron_variant                                                |
| rs1005777701 | intron_variant                                                                                    |
| rs1005792628 | genic_downstream_transcript_variant,intron_variant                                                |
| rs1005806983 | intron_variant                                                                                    |
| rs1005854219 | intron_variant,genic_upstream_transcript_variant                                                  |
| rs1005864465 | intron_variant                                                                                    |
| rs1005868316 | intron_variant                                                                                    |
| rs1005902166 | intron_variant,genic_upstream_transcript_variant                                                  |
| rs1005947737 | 3_prime_UTR_variant,genic_downstream_transcript_variant,non_coding_transcript_variant             |
| rs1005948074 | intron_variant                                                                                    |
| rs1005969221 | intron_variant,genic_upstream_transcript_variant                                                  |
| rs1006015195 | intron_variant,genic_upstream_transcript_variant                                                  |
| rs1006016023 | intron_variant,genic_upstream_transcript_variant                                                  |
| rs1006028717 | intron_variant                                                                                    |
| rs1006058983 | intron_variant                                                                                    |
| rs1006088662 | intron_variant                                                                                    |
| rs1006097274 | genic_downstream_transcript_variant,intron_variant                                                |
| rs1006128633 | intron_variant,genic_upstream_transcript_variant                                                  |
| rs1006165985 | genic_downstream_transcript_variant,intron_variant                                                |
| rs1006182765 | genic_downstream_transcript_variant,intron_variant                                                |
| rs1006183787 | intron_variant                                                                                    |
| rs1006198410 | intron_variant                                                                                    |
| rs1006199277 | intron_variant,genic_upstream_transcript_variant                                                  |
| rs1006213675 | intron_variant,genic_upstream_transcript_variant                                                  |
| rs1006239899 | genic_downstream_transcript_variant,intron_variant                                                |
| rs1006304745 | upstream_transcript_variant,intron_variant,2KB_upstream_variant,genic_upstream_transcript_variant |
| rs1006305997 | intron_variant,genic_upstream_transcript_variant                                                  |
| rs1006317147 | intron_variant                                                                                    |
| rs1006320975 | genic_downstream_transcript_variant,intron_variant                                                |
| rs1006337812 | intron_variant,genic_upstream_transcript_variant                                                  |
| rs1006338708 | upstream_transcript_variant,intron_variant,genic_upstream_transcript_variant                      |
| rs1006365524 | intron_variant,genic_upstream_transcript_variant                                                  |
| rs1006399079 | intron_variant                                                                                    |
| rs1006437066 | intron_variant,genic_upstream_transcript_variant                                                  |
| rs1006469219 | intron_variant,genic_upstream_transcript_variant                                                  |
| rs1006475498 | intron_variant                                                                                    |
| rs1006549423 | genic_downstream_transcript_variant,intron_variant                                                |
| rs1006550291 | intron_variant,genic_upstream_transcript_variant                                                  |
| rs1006564393 | genic_downstream_transcript_variant,intron_variant                                                |
| rs1006576286 | intron_variant                                                                                    |
| rs1006620854 | genic_downstream_transcript_variant,intron_variant                                                |
| rs1006639540 | genic_downstream_transcript_variant,intron_variant                                                |
| rs1006656986 | intron_variant                                                                                    |
| rs1006675246 | intron_variant                                                                                    |
| rs1006684509 | intron_variant,genic_upstream_transcript_variant                                                  |
| rs1006731611 | intron_variant                                                                                    |
| rs1006768061 | intron_variant                                                                                    |
| rs1006777000 | intron_variant                                                                                    |
| rs1006780676 | genic_downstream_transcript_variant,intron_variant                                                |
| rs1006809830 | upstream_transcript_variant,intron_variant,2KB_upstream_variant,genic_upstream_transcript_variant |
| rs1006822600 | genic_downstream_transcript_variant,intron_variant                                                |
| rs1006893041 | intron_variant,genic_upstream_transcript_variant                                                  |
| rs1006899382 | upstream_transcript_variant,intron_variant,2KB_upstream_variant,genic_upstream_transcript_variant |
| rs1006927925 | intron_variant                                                                                    |
| rs1006943076 | genic_downstream_transcript_variant,intron_variant                                                |
| rs1006964028 | intron_variant                                                                                    |
| rs1006976200 | intron_variant,genic_upstream_transcript_variant                                                  |
| rs1007025034 | intron_variant,genic_upstream_transcript_variant                                                  |
| rs1007045515 | intron_variant,genic_upstream_transcript_variant                                                  |
| rs1007045733 | genic_downstream_transcript_variant,intron_variant                                                |
| rs1007063343 | intron_variant                                                                                    |
| rs1007080391 | genic_downstream_transcript_variant,intron_variant                                                |
| rs1007093696 | intron_variant,genic_upstream_transcript_variant                                                  |
| rs1007096431 | genic_downstream_transcript_variant,intron_variant                                                |
| rs1007151410 | intron_variant,genic_upstream_transcript_variant                                                  |

|              |                                                                                                            |
|--------------|------------------------------------------------------------------------------------------------------------|
| rs1007170430 | intron_variant                                                                                             |
| rs1007175765 | downstream_transcript_variant,500B_downstream_variant                                                      |
| rs1007188272 | genic_downstream_transcript_variant,intron_variant                                                         |
| rs1007205533 | intron_variant,genic_upstream_transcript_variant                                                           |
| rs1007246817 | intron_variant,genic_upstream_transcript_variant                                                           |
| rs1007280889 | intron_variant                                                                                             |
| rs1007282466 | genic_downstream_transcript_variant,intron_variant                                                         |
| rs1007288564 | intron_variant,genic_upstream_transcript_variant                                                           |
| rs1007296084 | intron_variant                                                                                             |
| rs1007314554 | intron_variant,genic_upstream_transcript_variant                                                           |
| rs1007347570 | intron_variant                                                                                             |
| rs1007356441 | genic_downstream_transcript_variant,intron_variant                                                         |
| rs1007359541 | intron_variant                                                                                             |
| rs1007429124 | intron_variant,genic_upstream_transcript_variant                                                           |
| rs1007459515 | intron_variant,genic_upstream_transcript_variant                                                           |
| rs1007469103 | intron_variant,genic_upstream_transcript_variant                                                           |
| rs1007514809 | upstream_transcript_variant,intron_variant,genic_upstream_transcript_variant                               |
| rs1007519277 | intron_variant                                                                                             |
| rs1007521229 | upstream_transcript_variant,intron_variant,2KB_upstream_variant,genic_upstream_transcript_variant          |
| rs1007522195 | genic_downstream_transcript_variant,intron_variant                                                         |
| rs1007544555 | intron_variant                                                                                             |
| rs1007572081 | intron_variant,5_prime_UTR_variant,genic_upstream_transcript_variant,non_coding_transcript_variant         |
| rs1007592174 | genic_downstream_transcript_variant,intron_variant                                                         |
| rs1007598961 | intron_variant                                                                                             |
| rs1007604481 | intron_variant,genic_upstream_transcript_variant                                                           |
| rs1007619839 | genic_downstream_transcript_variant,intron_variant                                                         |
| rs1007628450 | intron_variant                                                                                             |
| rs1007640573 | intron_variant,genic_upstream_transcript_variant                                                           |
| rs1007647379 | intron_variant,genic_upstream_transcript_variant                                                           |
| rs1007674490 | coding_sequence_variant,missense_variant,genic_downstream_transcript_variant,non_coding_transcript_variant |
| rs1007685362 | intron_variant                                                                                             |
| rs1007716883 | intron_variant,genic_upstream_transcript_variant                                                           |
| rs1007723869 | intron_variant                                                                                             |
| rs1007749382 | intron_variant,genic_upstream_transcript_variant                                                           |
| rs1007765666 | intron_variant,genic_upstream_transcript_variant                                                           |
| rs1007767096 | intron_variant                                                                                             |
| rs1007782313 | intron_variant,genic_upstream_transcript_variant                                                           |
| rs1007825631 | genic_downstream_transcript_variant,intron_variant                                                         |
| rs1007825793 | intron_variant                                                                                             |
| rs1007839691 | intron_variant,splice_acceptor_variant                                                                     |
| rs1007875691 | intron_variant                                                                                             |
| rs1007897070 | intron_variant,genic_upstream_transcript_variant                                                           |
| rs1007897370 | upstream_transcript_variant,intron_variant,2KB_upstream_variant,genic_upstream_transcript_variant          |
| rs1007913995 | intron_variant                                                                                             |
| rs1007946866 | genic_downstream_transcript_variant,intron_variant                                                         |
| rs1007954344 | intron_variant,genic_upstream_transcript_variant                                                           |
| rs1007967880 | intron_variant,genic_upstream_transcript_variant                                                           |
| rs1008007147 | intron_variant                                                                                             |
| rs1008061773 | intron_variant,genic_upstream_transcript_variant                                                           |
| rs1008069096 | intron_variant,genic_upstream_transcript_variant                                                           |
| rs1008083083 | intron_variant                                                                                             |
| rs1008107821 | genic_downstream_transcript_variant,intron_variant                                                         |
| rs1008195382 | intron_variant,genic_upstream_transcript_variant                                                           |
| rs1008226325 | intron_variant                                                                                             |
| rs1008278918 | intron_variant,genic_upstream_transcript_variant                                                           |
| rs1008280497 | intron_variant                                                                                             |
| rs1008305534 | intron_variant                                                                                             |
| rs1008305909 | intron_variant,genic_upstream_transcript_variant                                                           |
| rs1008336231 | intron_variant                                                                                             |
| rs1008409555 | intron_variant                                                                                             |
| rs1008434652 | intron_variant,genic_upstream_transcript_variant                                                           |
| rs1008435047 | intron_variant                                                                                             |
| rs1008445015 | intron_variant                                                                                             |
| rs1008446120 | intron_variant,genic_upstream_transcript_variant                                                           |
| rs1008484844 | intron_variant                                                                                             |
| rs1008531717 | intron_variant,genic_upstream_transcript_variant                                                           |
| rs1008564654 | intron_variant                                                                                             |
| rs1008584552 | intron_variant,genic_upstream_transcript_variant                                                           |
| rs1008659247 | intron_variant,genic_upstream_transcript_variant                                                           |
| rs1008671931 | intron_variant                                                                                             |
| rs1008699593 | intron_variant                                                                                             |
| rs1008729647 | intron_variant                                                                                             |
| rs1008766776 | intron_variant,genic_upstream_transcript_variant                                                           |
| rs1008822572 | intron_variant                                                                                             |

|              |                                                                                                   |
|--------------|---------------------------------------------------------------------------------------------------|
| rs1008830512 | intron_variant,genic_upstream_transcript_variant                                                  |
| rs1008894100 | intron_variant,genic_upstream_transcript_variant                                                  |
| rs1008903515 | intron_variant                                                                                    |
| rs1008954443 | intron_variant                                                                                    |
| rs1008974858 | intron_variant,genic_upstream_transcript_variant                                                  |
| rs1008987633 | intron_variant,genic_upstream_transcript_variant                                                  |
| rs1008998127 | intron_variant                                                                                    |
| rs1009027458 | genic_downstream_transcript_variant,intron_variant                                                |
| rs1009043634 | genic_downstream_transcript_variant,intron_variant                                                |
| rs1009186700 | intron_variant                                                                                    |
| rs1009187351 | intron_variant                                                                                    |
| rs1009189369 | intron_variant,genic_upstream_transcript_variant                                                  |
| rs1009223423 | intron_variant,genic_upstream_transcript_variant                                                  |
| rs1009302062 | intron_variant                                                                                    |
| rs1009331746 | intron_variant,genic_upstream_transcript_variant                                                  |
| rs1009385009 | intron_variant,genic_upstream_transcript_variant                                                  |
| rs1009385386 | downstream_transcript_variant,intron_variant,genic_downstream_transcript_variant                  |
| rs1009407580 | intron_variant                                                                                    |
| rs1009436489 | intron_variant                                                                                    |
| rs1009473472 | intron_variant                                                                                    |
| rs1009525172 | intron_variant                                                                                    |
| rs1009552161 | intron_variant,genic_upstream_transcript_variant                                                  |
| rs1009590181 | genic_downstream_transcript_variant,intron_variant                                                |
| rs1009604581 | intron_variant                                                                                    |
| rs1009613235 | intron_variant                                                                                    |
| rs1009644404 | intron_variant,genic_upstream_transcript_variant                                                  |
| rs1009658335 | intron_variant                                                                                    |
| rs1009690200 | genic_downstream_transcript_variant,intron_variant                                                |
| rs1009713083 | intron_variant                                                                                    |
| rs1009725204 | intron_variant                                                                                    |
| rs1009727787 | intron_variant,genic_upstream_transcript_variant                                                  |
| rs1009743962 | intron_variant                                                                                    |
| rs1009774931 | 3_prime_UTR_variant,genic_downstream_transcript_variant,non_coding_transcript_variant             |
| rs1009778972 | intron_variant                                                                                    |
| rs1009801217 | intron_variant,genic_upstream_transcript_variant                                                  |
| rs1009808267 | intron_variant                                                                                    |
| rs1009812855 | intron_variant,genic_upstream_transcript_variant                                                  |
| rs1009826853 | 3_prime_UTR_variant,genic_downstream_transcript_variant,non_coding_transcript_variant             |
| rs1009865381 | intron_variant,genic_upstream_transcript_variant                                                  |
| rs1009937544 | intron_variant                                                                                    |
| rs1009939602 | intron_variant                                                                                    |
| rs1009950778 | intron_variant                                                                                    |
| rs1009982159 | genic_downstream_transcript_variant,intron_variant                                                |
| rs1010018621 | intron_variant                                                                                    |
| rs1010060953 | genic_downstream_transcript_variant,intron_variant                                                |
| rs1010077737 | intron_variant                                                                                    |
| rs1010078383 | 3_prime_UTR_variant,genic_downstream_transcript_variant,non_coding_transcript_variant             |
| rs1010119236 | intron_variant                                                                                    |
| rs1010129081 | intron_variant                                                                                    |
| rs1010136649 | intron_variant,genic_upstream_transcript_variant                                                  |
| rs1010210019 | intron_variant                                                                                    |
| rs1010215350 | intron_variant                                                                                    |
| rs1010238751 | intron_variant,genic_upstream_transcript_variant                                                  |
| rs1010246691 | genic_downstream_transcript_variant,intron_variant                                                |
| rs1010259602 | intron_variant                                                                                    |
| rs1010285734 | intron_variant,genic_upstream_transcript_variant                                                  |
| rs1010298466 | intron_variant,genic_upstream_transcript_variant                                                  |
| rs1010327477 | genic_downstream_transcript_variant,intron_variant                                                |
| rs1010330435 | genic_downstream_transcript_variant,intron_variant                                                |
| rs1010405928 | intron_variant,genic_upstream_transcript_variant                                                  |
| rs1010477285 | upstream_transcript_variant,intron_variant,2KB_upstream_variant,genic_upstream_transcript_variant |
| rs1010525134 | genic_downstream_transcript_variant,intron_variant                                                |
| rs1010542688 | upstream_transcript_variant,intron_variant,2KB_upstream_variant,genic_upstream_transcript_variant |
| rs1010587853 | intron_variant                                                                                    |
| rs1010604562 | intron_variant                                                                                    |
| rs1010622850 | intron_variant,genic_upstream_transcript_variant                                                  |
| rs1010624481 | genic_downstream_transcript_variant,intron_variant                                                |
| rs1010631352 | intron_variant                                                                                    |
| rs1010662415 | intron_variant                                                                                    |
| rs1010714001 | genic_downstream_transcript_variant,intron_variant                                                |
| rs1010729365 | intron_variant,genic_upstream_transcript_variant                                                  |
| rs1010782918 | intron_variant                                                                                    |
| rs1010786777 | genic_downstream_transcript_variant,intron_variant                                                |
| rs1010810717 | intron_variant                                                                                    |

|              |                                                                                                   |
|--------------|---------------------------------------------------------------------------------------------------|
| rs1010859067 | intron_variant,genic_upstream_transcript_variant                                                  |
| rs1010867326 | intron_variant,genic_upstream_transcript_variant                                                  |
| rs1010890664 | intron_variant                                                                                    |
| rs1010926765 | upstream_transcript_variant,intron_variant,2KB_upstream_variant,genic_upstream_transcript_variant |
| rs1010948901 | upstream_transcript_variant,intron_variant,2KB_upstream_variant,genic_upstream_transcript_variant |
| rs1010969420 | intron_variant,genic_upstream_transcript_variant                                                  |
| rs1010993047 | genic_downstream_transcript_variant,intron_variant                                                |
| rs1011038016 | intron_variant                                                                                    |
| rs1011045998 | intron_variant                                                                                    |
| rs1011067899 | intron_variant,genic_upstream_transcript_variant                                                  |
| rs1011074196 | genic_downstream_transcript_variant,intron_variant                                                |
| rs1011093720 | intron_variant,genic_upstream_transcript_variant                                                  |
| rs1011112531 | intron_variant,genic_upstream_transcript_variant                                                  |
| rs1011122380 | intron_variant,genic_upstream_transcript_variant                                                  |
| rs1011153901 | intron_variant,genic_upstream_transcript_variant                                                  |
| rs1011205779 | upstream_transcript_variant,intron_variant,genic_upstream_transcript_variant                      |
| rs1011208699 | intron_variant                                                                                    |
| rs1011211075 | genic_downstream_transcript_variant,intron_variant                                                |
| rs1011237585 | intron_variant,genic_upstream_transcript_variant                                                  |
| rs1011253323 | upstream_transcript_variant,intron_variant,2KB_upstream_variant,genic_upstream_transcript_variant |
| rs1011272926 | genic_downstream_transcript_variant,intron_variant                                                |
| rs1011284318 | upstream_transcript_variant,intron_variant,2KB_upstream_variant,genic_upstream_transcript_variant |
| rs1011295144 | genic_downstream_transcript_variant,intron_variant                                                |
| rs1011298601 | intron_variant,genic_upstream_transcript_variant                                                  |
| rs1011309216 | intron_variant                                                                                    |
| rs1011324394 | intron_variant,genic_upstream_transcript_variant                                                  |
| rs1011325367 | genic_downstream_transcript_variant,intron_variant                                                |
| rs1011371258 | intron_variant,genic_upstream_transcript_variant                                                  |
| rs1011390092 | intron_variant                                                                                    |
| rs1011420021 | intron_variant                                                                                    |
| rs1011442851 | intron_variant,genic_upstream_transcript_variant                                                  |
| rs1011523237 | upstream_transcript_variant,intron_variant,2KB_upstream_variant,genic_upstream_transcript_variant |
| rs1011530980 | intron_variant                                                                                    |
| rs1011555181 | intron_variant                                                                                    |
| rs1011614502 | intron_variant                                                                                    |
| rs1011621519 | genic_downstream_transcript_variant,intron_variant                                                |
| rs1011647384 | intron_variant                                                                                    |
| rs1011683805 | genic_downstream_transcript_variant,intron_variant                                                |
| rs1011711629 | intron_variant                                                                                    |
| rs1011725698 | intron_variant,genic_upstream_transcript_variant                                                  |
| rs1011731926 | genic_downstream_transcript_variant,intron_variant                                                |
| rs1011734549 | intron_variant,genic_upstream_transcript_variant                                                  |
| rs1011754674 | intron_variant                                                                                    |
| rs1011797103 | intron_variant                                                                                    |
| rs1011874013 | intron_variant,genic_upstream_transcript_variant                                                  |
| rs1011875969 | genic_downstream_transcript_variant,intron_variant                                                |
| rs1011908053 | upstream_transcript_variant,intron_variant,2KB_upstream_variant,genic_upstream_transcript_variant |
| rs1011909157 | intron_variant                                                                                    |
| rs1011946106 | genic_downstream_transcript_variant,intron_variant                                                |
| rs1011976405 | intron_variant                                                                                    |
| rs1011983544 | genic_downstream_transcript_variant,intron_variant                                                |
| rs1012018203 | genic_downstream_transcript_variant,intron_variant                                                |
| rs1012135004 | genic_downstream_transcript_variant,intron_variant                                                |
| rs1012138243 | genic_downstream_transcript_variant,intron_variant                                                |
| rs1012176880 | intron_variant                                                                                    |
| rs1012207294 | upstream_transcript_variant,intron_variant,2KB_upstream_variant,genic_upstream_transcript_variant |
| rs1012209640 | intron_variant                                                                                    |
| rs1012228300 | intron_variant                                                                                    |
| rs1012287470 | intron_variant,genic_upstream_transcript_variant                                                  |
| rs1012295473 | intron_variant,genic_upstream_transcript_variant                                                  |
| rs1012328532 | intron_variant,genic_upstream_transcript_variant                                                  |
| rs1012342113 | intron_variant,genic_upstream_transcript_variant                                                  |
| rs1012345356 | intron_variant                                                                                    |
| rs1012417084 | intron_variant,genic_upstream_transcript_variant                                                  |
| rs1012428580 | intron_variant,genic_upstream_transcript_variant                                                  |
| rs1012440618 | intron_variant                                                                                    |
| rs1012441677 | intron_variant,genic_upstream_transcript_variant                                                  |
| rs1012460652 | intron_variant,genic_upstream_transcript_variant                                                  |
| rs1012480550 | intron_variant                                                                                    |
| rs1012523074 | intron_variant                                                                                    |
| rs1012551357 | genic_downstream_transcript_variant,intron_variant                                                |
| rs1012578963 | upstream_transcript_variant,intron_variant,2KB_upstream_variant,genic_upstream_transcript_variant |
| rs1012579923 | genic_downstream_transcript_variant,intron_variant                                                |
| rs1012601175 | intron_variant,genic_upstream_transcript_variant                                                  |

|              |                                                                                                   |
|--------------|---------------------------------------------------------------------------------------------------|
| rs1012669276 | intron_variant,genic_upstream_transcript_variant                                                  |
| rs1012701223 | intron_variant                                                                                    |
| rs1012732027 | intron_variant                                                                                    |
| rs1012750996 | intron_variant,genic_upstream_transcript_variant                                                  |
| rs1012754969 | intron_variant                                                                                    |
| rs1012758720 | intron_variant,genic_upstream_transcript_variant                                                  |
| rs1012770452 | intron_variant,genic_upstream_transcript_variant                                                  |
| rs1012786753 | intron_variant,genic_upstream_transcript_variant                                                  |
| rs1012844792 | intron_variant,genic_upstream_transcript_variant                                                  |
| rs1012862828 | intron_variant                                                                                    |
| rs1012918002 | 2KB_upstream_variant,intron_variant,genic_upstream_transcript_variant,upstream_transcript_variant |
| rs1012918847 | intron_variant,genic_upstream_transcript_variant                                                  |
| rs1012948048 | intron_variant                                                                                    |
| rs1012965243 | intron_variant                                                                                    |
| rs1012976656 | intron_variant,genic_upstream_transcript_variant                                                  |
| rs1012993594 | genic_downstream_transcript_variant,intron_variant                                                |
| rs1013015234 | intron_variant,genic_upstream_transcript_variant                                                  |
| rs1013058082 | genic_downstream_transcript_variant,intron_variant                                                |
| rs1013077332 | intron_variant,genic_upstream_transcript_variant                                                  |
| rs1013149889 | intron_variant                                                                                    |
| rs1013155391 | intron_variant,genic_upstream_transcript_variant,upstream_transcript_variant                      |
| rs1013178489 | intron_variant,genic_upstream_transcript_variant                                                  |
| rs1013226549 | genic_downstream_transcript_variant,intron_variant                                                |
| rs1013283562 | intron_variant                                                                                    |
| rs1013300617 | genic_downstream_transcript_variant,intron_variant                                                |
| rs1013302959 | intron_variant,genic_upstream_transcript_variant                                                  |
| rs1013329027 | intron_variant,genic_upstream_transcript_variant,upstream_transcript_variant                      |
| rs1013349382 | genic_downstream_transcript_variant,intron_variant                                                |
| rs1013371212 | genic_downstream_transcript_variant,intron_variant                                                |
| rs1013400368 | intron_variant                                                                                    |
| rs1013437649 | intron_variant,genic_upstream_transcript_variant                                                  |
| rs1013443959 | intron_variant                                                                                    |
| rs1013445762 | intron_variant,genic_upstream_transcript_variant                                                  |
| rs1013484268 | genic_downstream_transcript_variant,intron_variant                                                |
| rs1013501515 | intron_variant,genic_upstream_transcript_variant                                                  |
| rs1013511279 | intron_variant,genic_upstream_transcript_variant                                                  |
| rs1013528843 | intron_variant,genic_upstream_transcript_variant                                                  |
| rs1013543871 | intron_variant                                                                                    |
| rs1013546347 | intron_variant,genic_upstream_transcript_variant                                                  |
| rs1013610820 | genic_downstream_transcript_variant,intron_variant                                                |
| rs1013651208 | intron_variant                                                                                    |
| rs1013653440 | intron_variant,genic_upstream_transcript_variant                                                  |
| rs1013707866 | intron_variant                                                                                    |
| rs1013744219 | genic_downstream_transcript_variant,intron_variant                                                |
| rs1013790639 | genic_downstream_transcript_variant,intron_variant                                                |
| rs1013805784 | 3_prime_UTR_variant,intron_variant                                                                |
| rs1013810355 | intron_variant,genic_upstream_transcript_variant                                                  |
| rs1013831374 | intron_variant,genic_upstream_transcript_variant                                                  |
| rs1013850503 | genic_downstream_transcript_variant,intron_variant                                                |
| rs1013861503 | intron_variant,5_prime_UTR_variant                                                                |
| rs1013896285 | intron_variant                                                                                    |
| rs1013933649 | intron_variant                                                                                    |
| rs1013940744 | genic_downstream_transcript_variant,intron_variant                                                |
| rs1013997008 | genic_downstream_transcript_variant,intron_variant                                                |
| rs1013997730 | genic_downstream_transcript_variant,intron_variant                                                |
| rs1014002619 | intron_variant,genic_upstream_transcript_variant                                                  |
| rs1014002694 | intron_variant                                                                                    |
| rs1014023504 | intron_variant,genic_upstream_transcript_variant                                                  |
| rs1014026471 | non_coding_transcript_variant,genic_downstream_transcript_variant,3_prime_UTR_variant             |
| rs1014098522 | intron_variant,genic_upstream_transcript_variant                                                  |
| rs1014117262 | intron_variant,genic_upstream_transcript_variant                                                  |
| rs1014142840 | genic_downstream_transcript_variant,intron_variant                                                |
| rs1014209126 | genic_downstream_transcript_variant,intron_variant                                                |
| rs1014223811 | intron_variant                                                                                    |
| rs1014287842 | genic_downstream_transcript_variant,intron_variant                                                |
| rs1014293126 | intron_variant,genic_upstream_transcript_variant                                                  |
| rs1014295864 | intron_variant                                                                                    |
| rs1014417199 | intron_variant,5_prime_UTR_variant                                                                |
| rs1014428346 | genic_downstream_transcript_variant,intron_variant                                                |
| rs1014451744 | intron_variant                                                                                    |
| rs1014473192 | intron_variant,genic_upstream_transcript_variant                                                  |
| rs1014488051 | intron_variant                                                                                    |
| rs1014553838 | intron_variant,genic_upstream_transcript_variant                                                  |
| rs1014567062 | intron_variant                                                                                    |

|              |                                                                                                   |
|--------------|---------------------------------------------------------------------------------------------------|
| rs1014639507 | intron_variant,genic_upstream_transcript_variant                                                  |
| rs1014648144 | intron_variant                                                                                    |
| rs1014656720 | intron_variant,genic_upstream_transcript_variant                                                  |
| rs1014668446 | intron_variant,genic_upstream_transcript_variant                                                  |
| rs1014671187 | intron_variant,genic_upstream_transcript_variant                                                  |
| rs1014709254 | intron_variant                                                                                    |
| rs1014724224 | intron_variant,genic_upstream_transcript_variant                                                  |
| rs1014726135 | genic_downstream_transcript_variant,intron_variant                                                |
| rs1014729224 | intron_variant                                                                                    |
| rs1014766607 | intron_variant,genic_upstream_transcript_variant                                                  |
| rs1014790136 | intron_variant,genic_upstream_transcript_variant                                                  |
| rs1014791960 | intron_variant                                                                                    |
| rs1014797297 | genic_downstream_transcript_variant,intron_variant                                                |
| rs1014804709 | intron_variant                                                                                    |
| rs1014837441 | intron_variant                                                                                    |
| rs1014838425 | intron_variant                                                                                    |
| rs1014877307 | genic_downstream_transcript_variant,intron_variant                                                |
| rs1014885675 | genic_downstream_transcript_variant,intron_variant                                                |
| rs1014903042 | intron_variant,genic_upstream_transcript_variant                                                  |
| rs1014919569 | 2KB_upstream_variant,intron_variant,genic_upstream_transcript_variant,upstream_transcript_variant |
| rs1014950000 | genic_downstream_transcript_variant,intron_variant                                                |
| rs1015049531 | intron_variant,genic_upstream_transcript_variant                                                  |
| rs1015050666 | intron_variant                                                                                    |
| rs1015066987 | intron_variant,genic_upstream_transcript_variant                                                  |
| rs1015075695 | 2KB_upstream_variant,intron_variant,genic_upstream_transcript_variant,upstream_transcript_variant |
| rs1015091709 | intron_variant                                                                                    |
| rs1015113445 | intron_variant,genic_upstream_transcript_variant                                                  |
| rs1015119673 | intron_variant,genic_upstream_transcript_variant                                                  |
| rs1015127069 | intron_variant                                                                                    |
| rs1015155326 | intron_variant                                                                                    |
| rs1015157989 | intron_variant                                                                                    |
| rs1015215204 | intron_variant,genic_upstream_transcript_variant                                                  |
| rs1015217708 | genic_downstream_transcript_variant,intron_variant                                                |
| rs1015238192 | intron_variant,genic_upstream_transcript_variant                                                  |
| rs1015269878 | intron_variant                                                                                    |
| rs1015286930 | genic_downstream_transcript_variant,intron_variant,downstream_transcript_variant                  |
| rs1015332898 | intron_variant,genic_upstream_transcript_variant                                                  |
| rs1015342126 | intron_variant,genic_upstream_transcript_variant                                                  |
| rs1015369120 | intron_variant                                                                                    |
| rs1015385973 | intron_variant,genic_upstream_transcript_variant                                                  |
| rs1015412889 | 2KB_upstream_variant,intron_variant,genic_upstream_transcript_variant,upstream_transcript_variant |
| rs1015425751 | 2KB_upstream_variant,intron_variant,genic_upstream_transcript_variant,upstream_transcript_variant |
| rs1015435163 | intron_variant                                                                                    |
| rs1015443914 | upstream_transcript_variant,intron_variant,genic_upstream_transcript_variant,5_prime_UTR_variant  |
| rs1015464050 | intron_variant                                                                                    |
| rs1015468031 | intron_variant,genic_upstream_transcript_variant                                                  |
| rs1015496542 | intron_variant                                                                                    |
| rs1015512446 | intron_variant                                                                                    |
| rs1015513836 | 2KB_upstream_variant,intron_variant,genic_upstream_transcript_variant,upstream_transcript_variant |
| rs1015518298 | intron_variant                                                                                    |
| rs1015544062 | genic_downstream_transcript_variant,intron_variant                                                |
| rs1015575369 | genic_downstream_transcript_variant,intron_variant                                                |
| rs1015577199 | intron_variant                                                                                    |
| rs1015592350 | intron_variant,genic_upstream_transcript_variant                                                  |
| rs1015600362 | genic_downstream_transcript_variant,intron_variant                                                |
| rs1015642082 | 2KB_upstream_variant,intron_variant,genic_upstream_transcript_variant,upstream_transcript_variant |
| rs1015715830 | intron_variant                                                                                    |
| rs1015758869 | genic_downstream_transcript_variant,intron_variant                                                |
| rs1015768696 | intron_variant                                                                                    |
| rs1015791819 | intron_variant,genic_upstream_transcript_variant                                                  |
| rs1015796520 | intron_variant,genic_upstream_transcript_variant                                                  |
| rs1015800142 | intron_variant                                                                                    |
| rs1015805812 | intron_variant,genic_upstream_transcript_variant                                                  |
| rs1015831550 | intron_variant,genic_upstream_transcript_variant                                                  |
| rs1015862695 | intron_variant,genic_upstream_transcript_variant                                                  |
| rs1015888778 | genic_downstream_transcript_variant,intron_variant,downstream_transcript_variant                  |
| rs1015906422 | intron_variant,genic_upstream_transcript_variant                                                  |
| rs1015985700 | genic_downstream_transcript_variant,intron_variant                                                |
| rs1015990447 | intron_variant                                                                                    |
| rs1016016129 | intron_variant,genic_upstream_transcript_variant                                                  |
| rs1016078413 | intron_variant,genic_upstream_transcript_variant                                                  |
| rs1016098351 | intron_variant                                                                                    |
| rs1016111321 | intron_variant                                                                                    |
| rs1016111783 | intron_variant,genic_upstream_transcript_variant                                                  |

|              |                                                                                                   |
|--------------|---------------------------------------------------------------------------------------------------|
| rs1016128674 | intron_variant                                                                                    |
| rs1016167230 | intron_variant,genic_upstream_transcript_variant                                                  |
| rs1016184879 | intron_variant,genic_upstream_transcript_variant                                                  |
| rs1016227377 | intron_variant,genic_upstream_transcript_variant                                                  |
| rs1016244343 | intron_variant,genic_upstream_transcript_variant,upstream_transcript_variant                      |
| rs1016251516 | genic_downstream_transcript_variant,intron_variant                                                |
| rs1016255081 | intron_variant                                                                                    |
| rs1016277577 | intron_variant                                                                                    |
| rs1016335395 | 2KB_upstream_variant,intron_variant,genic_upstream_transcript_variant,upstream_transcript_variant |
| rs1016339088 | intron_variant,genic_upstream_transcript_variant,upstream_transcript_variant                      |
| rs1016390434 | intron_variant,genic_upstream_transcript_variant,upstream_transcript_variant                      |
| rs1016392528 | intron_variant                                                                                    |
| rs1016412526 | genic_downstream_transcript_variant,intron_variant                                                |
| rs1016432368 | genic_downstream_transcript_variant,intron_variant                                                |
| rs1016464829 | intron_variant                                                                                    |
| rs1016468450 | intron_variant,genic_upstream_transcript_variant                                                  |
| rs1016480988 | intron_variant,genic_upstream_transcript_variant                                                  |
| rs1016493359 | genic_downstream_transcript_variant,intron_variant                                                |
| rs1016515883 | intron_variant                                                                                    |
| rs1016522847 | genic_downstream_transcript_variant,intron_variant                                                |
| rs1016552377 | genic_downstream_transcript_variant,intron_variant                                                |
| rs1016591861 | genic_downstream_transcript_variant,intron_variant                                                |
| rs1016611181 | intron_variant,genic_upstream_transcript_variant                                                  |
| rs1016642609 | genic_downstream_transcript_variant,intron_variant                                                |
| rs1016664819 | intron_variant,genic_upstream_transcript_variant                                                  |
| rs1016675174 | intron_variant                                                                                    |
| rs1016723908 | intron_variant                                                                                    |
| rs1016731598 | intron_variant                                                                                    |
| rs1016745629 | intron_variant,genic_upstream_transcript_variant                                                  |
| rs1016753913 | intron_variant,genic_upstream_transcript_variant                                                  |
| rs1016786554 | intron_variant,genic_upstream_transcript_variant                                                  |
| rs1016795790 | genic_downstream_transcript_variant,intron_variant                                                |
| rs1016802710 | intron_variant                                                                                    |
| rs1016858824 | genic_downstream_transcript_variant,intron_variant                                                |
| rs1016892011 | intron_variant,genic_upstream_transcript_variant                                                  |
| rs1016913058 | intron_variant,genic_upstream_transcript_variant                                                  |
| rs1016956440 | intron_variant                                                                                    |
| rs1016970788 | intron_variant,genic_upstream_transcript_variant                                                  |
| rs1016983216 | intron_variant,genic_upstream_transcript_variant                                                  |
| rs1017024385 | intron_variant                                                                                    |
| rs1017062541 | intron_variant                                                                                    |
| rs1017123880 | intron_variant,genic_upstream_transcript_variant                                                  |
| rs1017141910 | intron_variant                                                                                    |
| rs1017150372 | genic_downstream_transcript_variant,intron_variant                                                |
| rs1017176587 | genic_downstream_transcript_variant,intron_variant                                                |
| rs1017187747 | intron_variant,genic_upstream_transcript_variant                                                  |
| rs1017212598 | intron_variant,genic_upstream_transcript_variant                                                  |
| rs1017215136 | intron_variant                                                                                    |
| rs1017241732 | intron_variant,genic_upstream_transcript_variant                                                  |
| rs1017261560 | intron_variant                                                                                    |
| rs1017275256 | intron_variant                                                                                    |
| rs1017309811 | intron_variant                                                                                    |
| rs1017344874 | intron_variant                                                                                    |
| rs1017346121 | intron_variant,genic_upstream_transcript_variant                                                  |
| rs1017356179 | intron_variant                                                                                    |
| rs1017389964 | intron_variant                                                                                    |
| rs1017402995 | intron_variant,genic_upstream_transcript_variant                                                  |
| rs1017426391 | intron_variant                                                                                    |
| rs1017482688 | intron_variant,genic_upstream_transcript_variant                                                  |
| rs1017493599 | intron_variant,genic_upstream_transcript_variant                                                  |
| rs1017536922 | upstream_transcript_variant,intron_variant,genic_upstream_transcript_variant,5_prime_UTR_variant  |
| rs1017548698 | intron_variant                                                                                    |
| rs1017581079 | genic_downstream_transcript_variant,intron_variant                                                |
| rs1017583272 | intron_variant,genic_upstream_transcript_variant                                                  |
| rs1017594681 | genic_downstream_transcript_variant,intron_variant                                                |
| rs1017662310 | intron_variant                                                                                    |
| rs1017698232 | genic_downstream_transcript_variant,intron_variant                                                |
| rs1017707061 | genic_downstream_transcript_variant,intron_variant                                                |
| rs1017727184 | intron_variant,genic_upstream_transcript_variant                                                  |
| rs1017738621 | genic_downstream_transcript_variant,intron_variant                                                |
| rs1017748152 | genic_downstream_transcript_variant,intron_variant                                                |
| rs1017778524 | intron_variant                                                                                    |
| rs1017795889 | intron_variant,genic_upstream_transcript_variant,upstream_transcript_variant                      |
| rs1017801714 | intron_variant,genic_upstream_transcript_variant                                                  |

|              |                                                                                                                         |
|--------------|-------------------------------------------------------------------------------------------------------------------------|
| rs1017820376 | intron_variant,genic_upstream_transcript_variant                                                                        |
| rs1017848093 | intron_variant,genic_upstream_transcript_variant,upstream_transcript_variant                                            |
| rs1017865638 | intron_variant,genic_upstream_transcript_variant                                                                        |
| rs1017877653 | intron_variant,genic_upstream_transcript_variant                                                                        |
| rs1017896853 | intron_variant,genic_upstream_transcript_variant                                                                        |
| rs1017901909 | intron_variant,genic_upstream_transcript_variant                                                                        |
| rs1017944490 | intron_variant,genic_upstream_transcript_variant                                                                        |
| rs1017950011 | intron_variant                                                                                                          |
| rs1017959550 | intron_variant                                                                                                          |
| rs1018036240 | intron_variant,genic_upstream_transcript_variant                                                                        |
| rs1018043705 | genic_downstream_transcript_variant,intron_variant                                                                      |
| rs1018049582 | intron_variant,genic_upstream_transcript_variant                                                                        |
| rs1018057290 | intron_variant                                                                                                          |
| rs1018082972 | genic_downstream_transcript_variant,intron_variant                                                                      |
| rs1018101333 | intron_variant                                                                                                          |
| rs1018142861 | intron_variant                                                                                                          |
| rs1018143299 | intron_variant,genic_upstream_transcript_variant                                                                        |
| rs1018182216 | intron_variant,genic_upstream_transcript_variant                                                                        |
| rs1018224017 | intron_variant                                                                                                          |
| rs1018226445 | intron_variant                                                                                                          |
| rs1018239517 | intron_variant                                                                                                          |
| rs1018263301 | intron_variant,genic_upstream_transcript_variant                                                                        |
| rs1018273568 | intron_variant,genic_upstream_transcript_variant                                                                        |
| rs1018283471 | intron_variant                                                                                                          |
| rs1018297828 | genic_downstream_transcript_variant,intron_variant                                                                      |
| rs1018312371 | intron_variant                                                                                                          |
| rs1018334455 | intron_variant                                                                                                          |
| rs1018357996 | genic_downstream_transcript_variant,intron_variant                                                                      |
| rs1018371620 | genic_downstream_transcript_variant,intron_variant                                                                      |
| rs1018371815 | intron_variant,genic_upstream_transcript_variant                                                                        |
| rs1018392429 | intron_variant,genic_upstream_transcript_variant                                                                        |
| rs1018421827 | intron_variant,genic_upstream_transcript_variant                                                                        |
| rs1018478118 | intron_variant,genic_upstream_transcript_variant                                                                        |
| rs1018481785 | intron_variant                                                                                                          |
| rs1018562270 | genic_downstream_transcript_variant,intron_variant                                                                      |
| rs1018565359 | intron_variant                                                                                                          |
| rs1018590660 | intron_variant,genic_upstream_transcript_variant                                                                        |
| rs1018619569 | intron_variant                                                                                                          |
| rs1018736053 | intron_variant                                                                                                          |
| rs1018753719 | intron_variant,genic_upstream_transcript_variant                                                                        |
| rs1018792490 | intron_variant,genic_upstream_transcript_variant                                                                        |
| rs1018792989 | genic_downstream_transcript_variant,intron_variant                                                                      |
| rs1018807799 | intron_variant,genic_upstream_transcript_variant                                                                        |
| rs1018824734 | intron_variant,genic_upstream_transcript_variant                                                                        |
| rs1018844529 | intron_variant,genic_upstream_transcript_variant                                                                        |
| rs1018892619 | intron_variant,genic_upstream_transcript_variant                                                                        |
| rs1018909299 | intron_variant                                                                                                          |
| rs1018999843 | intron_variant,non_coding_transcript_variant,genic_upstream_transcript_variant,missense_variant,coding_sequence_variant |
| rs1019006787 | intron_variant                                                                                                          |
| rs1019008057 | genic_downstream_transcript_variant,intron_variant                                                                      |
| rs1019021493 | intron_variant,genic_upstream_transcript_variant                                                                        |
| rs1019031678 | intron_variant                                                                                                          |
| rs1019082959 | genic_downstream_transcript_variant,intron_variant                                                                      |
| rs1019119070 | intron_variant,genic_upstream_transcript_variant                                                                        |
| rs1019145623 | intron_variant                                                                                                          |
| rs1019165385 | genic_downstream_transcript_variant,intron_variant                                                                      |
| rs1019193356 | intron_variant,genic_upstream_transcript_variant                                                                        |
| rs1019199577 | intron_variant,genic_upstream_transcript_variant                                                                        |
| rs1019218013 | intron_variant                                                                                                          |
| rs1019265687 | intron_variant,genic_upstream_transcript_variant                                                                        |
| rs1019321897 | intron_variant                                                                                                          |
| rs1019327022 | intron_variant                                                                                                          |
| rs1019332741 | intron_variant                                                                                                          |
| rs1019338968 | intron_variant,genic_upstream_transcript_variant                                                                        |
| rs1019347156 | genic_downstream_transcript_variant,intron_variant                                                                      |
| rs1019347841 | genic_downstream_transcript_variant,intron_variant                                                                      |
| rs1019393038 | genic_downstream_transcript_variant,intron_variant                                                                      |
| rs1019409744 | intron_variant                                                                                                          |
| rs1019427156 | genic_downstream_transcript_variant,intron_variant                                                                      |
| rs1019441430 | intron_variant,genic_upstream_transcript_variant                                                                        |
| rs1019482662 | intron_variant                                                                                                          |
| rs1019499355 | genic_downstream_transcript_variant,intron_variant                                                                      |
| rs1019507641 | intron_variant,genic_upstream_transcript_variant                                                                        |
| rs1019553113 | genic_downstream_transcript_variant,intron_variant                                                                      |

|              |                                                                                                   |
|--------------|---------------------------------------------------------------------------------------------------|
| rs1019573048 | genic_downstream_transcript_variant,intron_variant                                                |
| rs1019587877 | intron_variant,genic_upstream_transcript_variant                                                  |
| rs1019679179 | intron_variant                                                                                    |
| rs1019697265 | intron_variant,genic_upstream_transcript_variant                                                  |
| rs1019705469 | genic_downstream_transcript_variant,intron_variant                                                |
| rs1019718599 | intron_variant                                                                                    |
| rs1019736277 | intron_variant,genic_upstream_transcript_variant                                                  |
| rs1019756093 | intron_variant,genic_upstream_transcript_variant                                                  |
| rs1019803047 | intron_variant                                                                                    |
| rs1019803902 | intron_variant                                                                                    |
| rs1019833265 | intron_variant                                                                                    |
| rs1019835097 | intron_variant                                                                                    |
| rs1019867927 | intron_variant                                                                                    |
| rs1019891911 | intron_variant,genic_upstream_transcript_variant                                                  |
| rs1019924096 | intron_variant,genic_upstream_transcript_variant                                                  |
| rs1019939145 | intron_variant                                                                                    |
| rs1019956192 | intron_variant,genic_upstream_transcript_variant                                                  |
| rs1019956621 | genic_downstream_transcript_variant,intron_variant                                                |
| rs1020033459 | intron_variant,genic_upstream_transcript_variant                                                  |
| rs1020059818 | intron_variant,genic_upstream_transcript_variant                                                  |
| rs1020100182 | non_coding_transcript_variant,genic_downstream_transcript_variant,3_prime_UTR_variant             |
| rs1020106969 | intron_variant,genic_upstream_transcript_variant                                                  |
| rs1020132519 | genic_downstream_transcript_variant,intron_variant                                                |
| rs1020133459 | intron_variant,genic_upstream_transcript_variant                                                  |
| rs1020173809 | non_coding_transcript_variant,genic_downstream_transcript_variant,3_prime_UTR_variant             |
| rs1020223984 | intron_variant                                                                                    |
| rs1020266851 | intron_variant                                                                                    |
| rs1020293984 | intron_variant,genic_upstream_transcript_variant                                                  |
| rs1020314429 | intron_variant,genic_upstream_transcript_variant                                                  |
| rs1020319819 | intron_variant                                                                                    |
| rs1020321551 | genic_downstream_transcript_variant,intron_variant                                                |
| rs1020355619 | genic_downstream_transcript_variant,intron_variant                                                |
| rs1020377724 | intron_variant                                                                                    |
| rs1020378372 | intron_variant,genic_upstream_transcript_variant                                                  |
| rs1020398460 | genic_downstream_transcript_variant,intron_variant                                                |
| rs1020408336 | genic_downstream_transcript_variant,intron_variant                                                |
| rs1020418470 | intron_variant,genic_upstream_transcript_variant                                                  |
| rs1020501108 | genic_downstream_transcript_variant,intron_variant                                                |
| rs1020508714 | genic_downstream_transcript_variant,intron_variant                                                |
| rs1020525889 | intron_variant                                                                                    |
| rs1020531083 | 2KB_upstream_variant,intron_variant,genic_upstream_transcript_variant,upstream_transcript_variant |
| rs1020549305 | intron_variant                                                                                    |
| rs1020561765 | intron_variant                                                                                    |
| rs1020593559 | genic_downstream_transcript_variant,intron_variant                                                |
| rs1020603722 | intron_variant                                                                                    |
| rs1020652423 | 2KB_upstream_variant,intron_variant,genic_upstream_transcript_variant,upstream_transcript_variant |
| rs1020661903 | intron_variant                                                                                    |
| rs1020666227 | genic_downstream_transcript_variant,intron_variant                                                |
| rs1020668739 | intron_variant,genic_upstream_transcript_variant                                                  |
| rs1020730410 | intron_variant,genic_upstream_transcript_variant                                                  |
| rs1020767289 | intron_variant                                                                                    |
| rs1020774340 | genic_downstream_transcript_variant,intron_variant                                                |
| rs1020783824 | 2KB_upstream_variant,intron_variant,genic_upstream_transcript_variant,upstream_transcript_variant |
| rs1020801171 | genic_downstream_transcript_variant,intron_variant                                                |
| rs1020814462 | genic_downstream_transcript_variant,intron_variant                                                |
| rs1020866228 | genic_downstream_transcript_variant,intron_variant                                                |
| rs1020890008 | intron_variant,genic_upstream_transcript_variant                                                  |
| rs1020903608 | intron_variant                                                                                    |
| rs1020944432 | intron_variant                                                                                    |
| rs1020979562 | genic_downstream_transcript_variant,intron_variant                                                |
| rs1021027951 | intron_variant                                                                                    |
| rs1021034173 | 2KB_upstream_variant,intron_variant,genic_upstream_transcript_variant,upstream_transcript_variant |
| rs1021038709 | intron_variant,genic_upstream_transcript_variant                                                  |
| rs1021044350 | intron_variant,genic_upstream_transcript_variant                                                  |
| rs1021046465 | genic_downstream_transcript_variant,intron_variant                                                |
| rs1021064672 | intron_variant,genic_upstream_transcript_variant                                                  |
| rs1021100343 | genic_downstream_transcript_variant,intron_variant                                                |
| rs1021143894 | intron_variant,genic_upstream_transcript_variant                                                  |
| rs1021158996 | intron_variant,genic_upstream_transcript_variant                                                  |
| rs1021175524 | intron_variant,genic_upstream_transcript_variant                                                  |
| rs1021196224 | intron_variant,genic_upstream_transcript_variant                                                  |
| rs1021231886 | intron_variant,genic_upstream_transcript_variant                                                  |
| rs1021241041 | intron_variant                                                                                    |
| rs1021255153 | 2KB_upstream_variant,intron_variant,genic_upstream_transcript_variant,upstream_transcript_variant |

|              |                                                                                                              |
|--------------|--------------------------------------------------------------------------------------------------------------|
| rs1021274644 | intron_variant                                                                                               |
| rs1021274868 | intron_variant                                                                                               |
| rs1021309404 | 2KB_upstream_variant,intron_variant,genic_upstream_transcript_variant,upstream_transcript_variant            |
| rs1021320595 | intron_variant,genic_upstream_transcript_variant                                                             |
| rs1021360436 | intron_variant                                                                                               |
| rs1021388112 | intron_variant,genic_upstream_transcript_variant                                                             |
| rs1021391808 | intron_variant                                                                                               |
| rs1021495272 | intron_variant                                                                                               |
| rs1021512157 | intron_variant                                                                                               |
| rs1021522920 | intron_variant,genic_upstream_transcript_variant                                                             |
| rs1021574004 | intron_variant                                                                                               |
| rs1021579711 | intron_variant                                                                                               |
| rs1021585880 | non_coding_transcript_variant,intron_variant,genic_upstream_transcript_variant,5_prime_UTR_variant           |
| rs1021607286 | intron_variant,genic_upstream_transcript_variant                                                             |
| rs1021607765 | intron_variant                                                                                               |
| rs1021665656 | intron_variant                                                                                               |
| rs1021670765 | genic_downstream_transcript_variant,intron_variant                                                           |
| rs1021742179 | intron_variant                                                                                               |
| rs1021750680 | intron_variant,genic_upstream_transcript_variant                                                             |
| rs1021827033 | intron_variant                                                                                               |
| rs1021846020 | intron_variant,genic_upstream_transcript_variant                                                             |
| rs1021852710 | intron_variant                                                                                               |
| rs1021892901 | intron_variant                                                                                               |
| rs1021924709 | intron_variant                                                                                               |
| rs1021944753 | intron_variant                                                                                               |
| rs1021985034 | intron_variant,genic_upstream_transcript_variant                                                             |
| rs1022059664 | genic_downstream_transcript_variant,intron_variant                                                           |
| rs1022080072 | intron_variant                                                                                               |
| rs1022102008 | intron_variant                                                                                               |
| rs1022113954 | genic_downstream_transcript_variant,intron_variant                                                           |
| rs1022129005 | intron_variant,genic_upstream_transcript_variant                                                             |
| rs1022160287 | intron_variant,genic_upstream_transcript_variant                                                             |
| rs1022160614 | intron_variant                                                                                               |
| rs1022174314 | intron_variant                                                                                               |
| rs1022226566 | intron_variant                                                                                               |
| rs1022304429 | genic_downstream_transcript_variant,intron_variant                                                           |
| rs1022324467 | genic_downstream_transcript_variant,intron_variant                                                           |
| rs1022335309 | intron_variant                                                                                               |
| rs1022363387 | genic_downstream_transcript_variant,intron_variant                                                           |
| rs1022378844 | intron_variant,genic_upstream_transcript_variant                                                             |
| rs1022402432 | intron_variant,genic_upstream_transcript_variant                                                             |
| rs1022406518 | intron_variant                                                                                               |
| rs1022409363 | intron_variant,genic_upstream_transcript_variant                                                             |
| rs1022434579 | genic_downstream_transcript_variant,intron_variant                                                           |
| rs1022439911 | genic_downstream_transcript_variant,intron_variant                                                           |
| rs1022443102 | intron_variant,genic_upstream_transcript_variant                                                             |
| rs1022506386 | genic_downstream_transcript_variant,intron_variant                                                           |
| rs1022536623 | intron_variant,genic_upstream_transcript_variant                                                             |
| rs1022574513 | intron_variant                                                                                               |
| rs1022583134 | intron_variant                                                                                               |
| rs1022617901 | genic_downstream_transcript_variant,intron_variant                                                           |
| rs1022649801 | intron_variant                                                                                               |
| rs1022669595 | intron_variant                                                                                               |
| rs1022671692 | genic_downstream_transcript_variant,intron_variant                                                           |
| rs1022692471 | genic_downstream_transcript_variant,intron_variant                                                           |
| rs1022695914 | intron_variant,genic_upstream_transcript_variant                                                             |
| rs1022715198 | intron_variant                                                                                               |
| rs1022778639 | intron_variant,genic_upstream_transcript_variant,upstream_transcript_variant                                 |
| rs1022788036 | intron_variant                                                                                               |
| rs1022800185 | intron_variant                                                                                               |
| rs1022818610 | coding_sequence_variant,non_coding_transcript_variant,genic_downstream_transcript_variant,synonymous_variant |
| rs1022869188 | intron_variant,genic_upstream_transcript_variant                                                             |
| rs1022870621 | intron_variant                                                                                               |
| rs1022873938 | intron_variant                                                                                               |
| rs1022896086 | intron_variant,genic_upstream_transcript_variant                                                             |
| rs1022920930 | 2KB_upstream_variant,intron_variant,genic_upstream_transcript_variant,upstream_transcript_variant            |
| rs1022939447 | 2KB_upstream_variant,intron_variant,genic_upstream_transcript_variant,upstream_transcript_variant            |
| rs1022956475 | genic_downstream_transcript_variant,intron_variant                                                           |
| rs1022963538 | intron_variant,genic_upstream_transcript_variant                                                             |
| rs1022972035 | intron_variant,genic_upstream_transcript_variant                                                             |
| rs1022985983 | genic_downstream_transcript_variant,intron_variant                                                           |
| rs1023012040 | intron_variant,genic_upstream_transcript_variant                                                             |
| rs1023025129 | intron_variant                                                                                               |
| rs1023040748 | intron_variant                                                                                               |

|              |                                                                                                   |
|--------------|---------------------------------------------------------------------------------------------------|
| rs1023060962 | intron_variant                                                                                    |
| rs1023216992 | intron_variant,genic_upstream_transcript_variant                                                  |
| rs1023220530 | genic_downstream_transcript_variant,intron_variant                                                |
| rs1023236159 | intron_variant,genic_upstream_transcript_variant                                                  |
| rs1023242949 | intron_variant                                                                                    |
| rs1023255093 | intron_variant,genic_upstream_transcript_variant                                                  |
| rs1023340526 | intron_variant                                                                                    |
| rs1023341782 | intron_variant,genic_upstream_transcript_variant                                                  |
| rs1023351017 | intron_variant,genic_upstream_transcript_variant                                                  |
| rs1023359328 | intron_variant                                                                                    |
| rs1023430723 | genic_downstream_transcript_variant,intron_variant                                                |
| rs1023480123 | intron_variant,genic_upstream_transcript_variant                                                  |
| rs1023501288 | intron_variant                                                                                    |
| rs1023514985 | genic_downstream_transcript_variant,intron_variant                                                |
| rs1023535758 | intron_variant                                                                                    |
| rs1023548602 | intron_variant,genic_upstream_transcript_variant                                                  |
| rs1023557508 | intron_variant,genic_upstream_transcript_variant                                                  |
| rs1023564119 | intron_variant,genic_upstream_transcript_variant                                                  |
| rs1023564610 | genic_downstream_transcript_variant,intron_variant                                                |
| rs1023569732 | intron_variant,genic_upstream_transcript_variant                                                  |
| rs1023576548 | intron_variant                                                                                    |
| rs1023621074 | intron_variant,genic_upstream_transcript_variant                                                  |
| rs1023635171 | intron_variant,genic_upstream_transcript_variant                                                  |
| rs1023653319 | genic_downstream_transcript_variant,intron_variant                                                |
| rs1023654209 | genic_downstream_transcript_variant,intron_variant                                                |
| rs1023715576 | intron_variant,genic_upstream_transcript_variant                                                  |
| rs1023731875 | intron_variant,genic_upstream_transcript_variant,upstream_transcript_variant                      |
| rs1023751733 | intron_variant,genic_upstream_transcript_variant                                                  |
| rs1023769275 | intron_variant,genic_upstream_transcript_variant                                                  |
| rs1023771936 | intron_variant                                                                                    |
| rs1023825323 | intron_variant,genic_upstream_transcript_variant                                                  |
| rs1023836942 | intron_variant                                                                                    |
| rs1023854899 | intron_variant,genic_upstream_transcript_variant                                                  |
| rs1023919125 | intron_variant,genic_upstream_transcript_variant                                                  |
| rs1023923371 | genic_downstream_transcript_variant,intron_variant                                                |
| rs1023932777 | intron_variant                                                                                    |
| rs1023947279 | intron_variant,genic_upstream_transcript_variant                                                  |
| rs1024001694 | intron_variant                                                                                    |
| rs1024040421 | intron_variant                                                                                    |
| rs1024054024 | intron_variant,genic_upstream_transcript_variant                                                  |
| rs1024091351 | intron_variant,genic_upstream_transcript_variant                                                  |
| rs1024108081 | non_coding_transcript_variant,genic_downstream_transcript_variant,3_prime_UTR_variant             |
| rs1024112887 | intron_variant                                                                                    |
| rs1024130218 | intron_variant,genic_upstream_transcript_variant                                                  |
| rs1024149574 | intron_variant,genic_upstream_transcript_variant                                                  |
| rs1024224075 | intron_variant,genic_upstream_transcript_variant                                                  |
| rs1024240925 | intron_variant,genic_upstream_transcript_variant                                                  |
| rs1024249903 | intron_variant                                                                                    |
| rs1024335209 | intron_variant                                                                                    |
| rs1024344425 | intron_variant,genic_upstream_transcript_variant                                                  |
| rs1024370645 | intron_variant,genic_upstream_transcript_variant                                                  |
| rs1024398461 | intron_variant                                                                                    |
| rs1024403762 | intron_variant,genic_upstream_transcript_variant                                                  |
| rs1024405857 | intron_variant                                                                                    |
| rs1024426747 | intron_variant                                                                                    |
| rs1024461805 | 2KB_upstream_variant,intron_variant,genic_upstream_transcript_variant,upstream_transcript_variant |
| rs1024496839 | intron_variant,genic_upstream_transcript_variant                                                  |
| rs1024506023 | coding_sequence_variant,non_coding_transcript_variant,missense_variant                            |
| rs1024554098 | intron_variant,genic_upstream_transcript_variant                                                  |
| rs1024596023 | intron_variant                                                                                    |
| rs1024627767 | intron_variant,genic_upstream_transcript_variant                                                  |
| rs1024644361 | intron_variant,genic_upstream_transcript_variant                                                  |
| rs1024646460 | intron_variant                                                                                    |
| rs1024659888 | non_coding_transcript_variant,genic_downstream_transcript_variant,3_prime_UTR_variant             |
| rs1024667425 | intron_variant                                                                                    |
| rs1024727952 | intron_variant                                                                                    |
| rs1024740436 | intron_variant                                                                                    |
| rs1024744238 | genic_upstream_transcript_variant,intron_variant                                                  |
| rs1024746681 | intron_variant,genic_downstream_transcript_variant,downstream_transcript_variant                  |
| rs1024758521 | genic_upstream_transcript_variant,intron_variant,upstream_transcript_variant                      |
| rs1024814400 | intron_variant,3_prime_UTR_variant                                                                |
| rs1024831931 | intron_variant                                                                                    |
| rs1024835463 | genic_upstream_transcript_variant,intron_variant                                                  |
| rs1024838641 | intron_variant                                                                                    |

|              |                                                                                                   |
|--------------|---------------------------------------------------------------------------------------------------|
| rs1024894550 | intron_variant                                                                                    |
| rs1024898247 | intron_variant,genic_downstream_transcript_variant                                                |
| rs1024932344 | genic_upstream_transcript_variant,intron_variant                                                  |
| rs1024933536 | intron_variant                                                                                    |
| rs1024970154 | genic_upstream_transcript_variant,intron_variant                                                  |
| rs1024971214 | intron_variant,genic_downstream_transcript_variant                                                |
| rs1024977874 | intron_variant                                                                                    |
| rs1025018256 | genic_upstream_transcript_variant,intron_variant                                                  |
| rs1025025147 | intron_variant,genic_downstream_transcript_variant                                                |
| rs1025133646 | intron_variant                                                                                    |
| rs1025152194 | genic_upstream_transcript_variant,intron_variant                                                  |
| rs1025152757 | intron_variant                                                                                    |
| rs1025178872 | genic_upstream_transcript_variant,intron_variant,2KB_upstream_variant,upstream_transcript_variant |
| rs1025181706 | intron_variant                                                                                    |
| rs1025191276 | intron_variant,genic_downstream_transcript_variant                                                |
| rs1025196653 | genic_upstream_transcript_variant,intron_variant                                                  |
| rs1025200724 | genic_upstream_transcript_variant,intron_variant                                                  |
| rs1025204532 | genic_upstream_transcript_variant,intron_variant                                                  |
| rs1025228687 | intron_variant                                                                                    |
| rs1025238479 | genic_upstream_transcript_variant,intron_variant                                                  |
| rs1025360362 | genic_upstream_transcript_variant,intron_variant                                                  |
| rs1025419708 | intron_variant                                                                                    |
| rs1025423248 | genic_upstream_transcript_variant,intron_variant                                                  |
| rs1025432258 | genic_upstream_transcript_variant,intron_variant                                                  |
| rs1025440831 | genic_upstream_transcript_variant,intron_variant                                                  |
| rs1025453048 | intron_variant                                                                                    |
| rs1025467259 | genic_upstream_transcript_variant,intron_variant,2KB_upstream_variant,upstream_transcript_variant |
| rs1025502766 | intron_variant                                                                                    |
| rs1025521964 | intron_variant,genic_downstream_transcript_variant                                                |
| rs1025528705 | intron_variant                                                                                    |
| rs1025543139 | genic_upstream_transcript_variant,intron_variant                                                  |
| rs1025548892 | genic_upstream_transcript_variant,intron_variant                                                  |
| rs1025593394 | intron_variant,genic_downstream_transcript_variant                                                |
| rs1025635076 | intron_variant                                                                                    |
| rs1025655839 | genic_upstream_transcript_variant,intron_variant                                                  |
| rs1025668759 | intron_variant                                                                                    |
| rs1025713656 | genic_upstream_transcript_variant,intron_variant                                                  |
| rs1025775703 | intron_variant                                                                                    |
| rs1025791891 | genic_upstream_transcript_variant,intron_variant                                                  |
| rs1025807773 | intron_variant                                                                                    |
| rs1025820467 | intron_variant                                                                                    |
| rs1025862032 | intron_variant                                                                                    |
| rs1025938195 | genic_upstream_transcript_variant,intron_variant                                                  |
| rs1026050263 | genic_upstream_transcript_variant,intron_variant                                                  |
| rs1026089493 | non_coding_transcript_variant,genic_downstream_transcript_variant,3_prime_UTR_variant             |
| rs1026108780 | intron_variant                                                                                    |
| rs1026121853 | genic_upstream_transcript_variant,intron_variant                                                  |
| rs1026168519 | intron_variant                                                                                    |
| rs1026197638 | intron_variant                                                                                    |
| rs1026207273 | genic_upstream_transcript_variant,intron_variant                                                  |
| rs1026222878 | genic_upstream_transcript_variant,intron_variant                                                  |
| rs1026280249 | intron_variant,genic_downstream_transcript_variant                                                |
| rs1026290900 | intron_variant,genic_downstream_transcript_variant                                                |
| rs1026307052 | genic_upstream_transcript_variant,intron_variant                                                  |
| rs1026319741 | intron_variant,genic_downstream_transcript_variant                                                |
| rs1026369431 | intron_variant                                                                                    |
| rs1026420297 | genic_upstream_transcript_variant,intron_variant                                                  |
| rs1026429907 | intron_variant                                                                                    |
| rs1026451594 | non_coding_transcript_variant,genic_downstream_transcript_variant,3_prime_UTR_variant             |
| rs1026476215 | intron_variant                                                                                    |
| rs1026488974 | intron_variant                                                                                    |
| rs1026507881 | intron_variant                                                                                    |
| rs1026532144 | intron_variant,genic_downstream_transcript_variant                                                |
| rs1026555704 | intron_variant                                                                                    |
| rs1026576414 | intron_variant                                                                                    |
| rs1026613486 | intron_variant                                                                                    |
| rs1026641397 | genic_upstream_transcript_variant,intron_variant                                                  |
| rs1026644109 | intron_variant,genic_downstream_transcript_variant                                                |
| rs1026665649 | genic_upstream_transcript_variant,intron_variant,upstream_transcript_variant                      |
| rs1026676193 | genic_upstream_transcript_variant,intron_variant                                                  |
| rs1026690760 | intron_variant                                                                                    |
| rs1026703523 | genic_upstream_transcript_variant,intron_variant                                                  |
| rs1026714165 | intron_variant                                                                                    |
| rs1026775333 | intron_variant,genic_downstream_transcript_variant,downstream_transcript_variant                  |

|              |                                                                                                                         |
|--------------|-------------------------------------------------------------------------------------------------------------------------|
| rs1026792094 | genic_upstream_transcript_variant,intron_variant                                                                        |
| rs1026822474 | intron_variant                                                                                                          |
| rs1026832778 | genic_upstream_transcript_variant,intron_variant                                                                        |
| rs1026850747 | genic_upstream_transcript_variant,intron_variant                                                                        |
| rs1026878880 | intron_variant                                                                                                          |
| rs1026881332 | intron_variant,genic_downstream_transcript_variant                                                                      |
| rs1026918336 | intron_variant,genic_downstream_transcript_variant                                                                      |
| rs1026927243 | genic_upstream_transcript_variant,intron_variant                                                                        |
| rs1027001627 | intron_variant                                                                                                          |
| rs1027004349 | intron_variant,genic_downstream_transcript_variant                                                                      |
| rs1027054369 | genic_upstream_transcript_variant,intron_variant,2KB_upstream_variant,upstream_transcript_variant                       |
| rs1027068758 | genic_upstream_transcript_variant,intron_variant                                                                        |
| rs1027111564 | intron_variant                                                                                                          |
| rs1027140628 | intron_variant                                                                                                          |
| rs1027153638 | intron_variant,genic_downstream_transcript_variant                                                                      |
| rs1027160520 | intron_variant,genic_downstream_transcript_variant                                                                      |
| rs1027206441 | intron_variant,genic_downstream_transcript_variant                                                                      |
| rs1027272067 | intron_variant,genic_downstream_transcript_variant                                                                      |
| rs1027295353 | genic_upstream_transcript_variant,intron_variant                                                                        |
| rs1027309488 | intron_variant                                                                                                          |
| rs1027311640 | intron_variant                                                                                                          |
| rs1027333045 | intron_variant,genic_downstream_transcript_variant                                                                      |
| rs1027373411 | genic_upstream_transcript_variant,intron_variant,2KB_upstream_variant,upstream_transcript_variant                       |
| rs1027429538 | genic_upstream_transcript_variant,intron_variant                                                                        |
| rs1027442439 | genic_upstream_transcript_variant,intron_variant                                                                        |
| rs1027443630 | intron_variant                                                                                                          |
| rs1027479697 | genic_upstream_transcript_variant,intron_variant                                                                        |
| rs1027508629 | genic_upstream_transcript_variant,intron_variant                                                                        |
| rs1027526121 | genic_upstream_transcript_variant,intron_variant,2KB_upstream_variant,upstream_transcript_variant                       |
| rs1027540070 | genic_upstream_transcript_variant,intron_variant                                                                        |
| rs1027557988 | intron_variant                                                                                                          |
| rs1027612312 | genic_upstream_transcript_variant,intron_variant                                                                        |
| rs1027646670 | intron_variant,genic_downstream_transcript_variant                                                                      |
| rs1027738818 | missense_variant,genic_upstream_transcript_variant,intron_variant,non_coding_transcript_variant,coding_sequence_variant |
| rs1027786262 | genic_upstream_transcript_variant,intron_variant                                                                        |
| rs1027796512 | intron_variant                                                                                                          |
| rs1027808795 | intron_variant                                                                                                          |
| rs1027833640 | genic_upstream_transcript_variant,2KB_upstream_variant,intron_variant,upstream_transcript_variant                       |
| rs1027854017 | intron_variant                                                                                                          |
| rs1027873185 | intron_variant                                                                                                          |
| rs1027929392 | genic_upstream_transcript_variant,intron_variant                                                                        |
| rs1027930146 | genic_upstream_transcript_variant,intron_variant                                                                        |
| rs1027951071 | intron_variant,genic_downstream_transcript_variant                                                                      |
| rs1027953962 | genic_upstream_transcript_variant,intron_variant                                                                        |
| rs1027964777 | intron_variant                                                                                                          |
| rs1028065950 | genic_upstream_transcript_variant,intron_variant                                                                        |
| rs1028083886 | intron_variant                                                                                                          |
| rs1028134766 | genic_upstream_transcript_variant,intron_variant                                                                        |
| rs1028207880 | genic_upstream_transcript_variant,intron_variant                                                                        |
| rs1028208514 | intron_variant                                                                                                          |
| rs1028249112 | genic_upstream_transcript_variant,intron_variant                                                                        |
| rs1028249608 | genic_upstream_transcript_variant,intron_variant                                                                        |
| rs1028312735 | genic_upstream_transcript_variant,intron_variant                                                                        |
| rs1028324917 | intron_variant,genic_downstream_transcript_variant                                                                      |
| rs1028340516 | intron_variant                                                                                                          |
| rs1028355068 | intron_variant,genic_downstream_transcript_variant                                                                      |
| rs1028381199 | intron_variant                                                                                                          |
| rs1028421413 | intron_variant                                                                                                          |
| rs1028427864 | genic_upstream_transcript_variant,intron_variant                                                                        |
| rs1028460880 | intron_variant,genic_downstream_transcript_variant                                                                      |
| rs1028485983 | intron_variant                                                                                                          |
| rs1028514982 | intron_variant                                                                                                          |
| rs1028528698 | genic_upstream_transcript_variant,intron_variant                                                                        |
| rs1028560520 | intron_variant                                                                                                          |
| rs1028608450 | genic_upstream_transcript_variant,intron_variant                                                                        |
| rs1028622524 | genic_upstream_transcript_variant,intron_variant                                                                        |
| rs1028630144 | genic_upstream_transcript_variant,intron_variant                                                                        |
| rs1028634509 | genic_upstream_transcript_variant,intron_variant                                                                        |
| rs1028654157 | intron_variant                                                                                                          |
| rs1028726517 | intron_variant                                                                                                          |
| rs1028745568 | genic_upstream_transcript_variant,intron_variant                                                                        |
| rs1028759335 | genic_upstream_transcript_variant,intron_variant                                                                        |
| rs1028870865 | genic_upstream_transcript_variant,intron_variant                                                                        |
| rs1028894168 | genic_upstream_transcript_variant,intron_variant                                                                        |

|              |                                                                                                    |
|--------------|----------------------------------------------------------------------------------------------------|
| rs1028948413 | intron_variant                                                                                     |
| rs1028958269 | genic_upstream_transcript_variant,intron_variant                                                   |
| rs1028966184 | intron_variant                                                                                     |
| rs1028979439 | intron_variant                                                                                     |
| rs1029010488 | genic_upstream_transcript_variant,intron_variant                                                   |
| rs1029045424 | intron_variant                                                                                     |
| rs1029062272 | intron_variant,genic_downstream_transcript_variant                                                 |
| rs1029097834 | intron_variant,genic_downstream_transcript_variant                                                 |
| rs1029129632 | genic_upstream_transcript_variant,intron_variant                                                   |
| rs1029156431 | intron_variant                                                                                     |
| rs1029186303 | intron_variant                                                                                     |
| rs1029216979 | intron_variant,genic_downstream_transcript_variant                                                 |
| rs1029224555 | intron_variant                                                                                     |
| rs1029233710 | genic_upstream_transcript_variant,intron_variant                                                   |
| rs1029313604 | intron_variant                                                                                     |
| rs1029333528 | genic_upstream_transcript_variant,intron_variant                                                   |
| rs1029430722 | intron_variant,genic_downstream_transcript_variant                                                 |
| rs1029436231 | genic_upstream_transcript_variant,intron_variant                                                   |
| rs1029449613 | intron_variant                                                                                     |
| rs1029468298 | genic_upstream_transcript_variant,intron_variant                                                   |
| rs1029481577 | non_coding_transcript_variant,5_prime_UTR_variant,intron_variant,genic_upstream_transcript_variant |
| rs1029525680 | genic_upstream_transcript_variant,intron_variant                                                   |
| rs1029557150 | genic_upstream_transcript_variant,2KB_upstream_variant,intron_variant,upstream_transcript_variant  |
| rs1029564320 | intron_variant                                                                                     |
| rs1029564438 | intron_variant                                                                                     |
| rs1029586342 | genic_upstream_transcript_variant,intron_variant                                                   |
| rs1029588779 | intron_variant                                                                                     |
| rs1029616129 | intron_variant                                                                                     |
| rs1029618378 | intron_variant,genic_downstream_transcript_variant                                                 |
| rs1029643456 | intron_variant,genic_downstream_transcript_variant                                                 |
| rs1029664052 | genic_upstream_transcript_variant,intron_variant                                                   |
| rs1029693386 | intron_variant,genic_downstream_transcript_variant                                                 |
| rs1029707067 | genic_upstream_transcript_variant,intron_variant,2KB_upstream_variant,upstream_transcript_variant  |
| rs1029716326 | genic_upstream_transcript_variant,intron_variant                                                   |
| rs1029739918 | intron_variant,genic_downstream_transcript_variant                                                 |
| rs1029770146 | intron_variant,genic_downstream_transcript_variant                                                 |
| rs1029797658 | intron_variant                                                                                     |
| rs1029802073 | intron_variant,genic_downstream_transcript_variant                                                 |
| rs1029821893 | intron_variant                                                                                     |
| rs1029875574 | intron_variant                                                                                     |
| rs1029878661 | intron_variant,genic_downstream_transcript_variant                                                 |
| rs1029891407 | intron_variant                                                                                     |
| rs1029899403 | intron_variant                                                                                     |
| rs1029905895 | genic_upstream_transcript_variant,intron_variant                                                   |
| rs1029955797 | intron_variant,genic_downstream_transcript_variant                                                 |
| rs1030000033 | genic_upstream_transcript_variant,intron_variant                                                   |
| rs1030022257 | genic_upstream_transcript_variant,intron_variant                                                   |
| rs1030034254 | intron_variant                                                                                     |
| rs1030039956 | genic_upstream_transcript_variant,intron_variant                                                   |
| rs1030102539 | genic_upstream_transcript_variant,intron_variant                                                   |
| rs1030102892 | genic_upstream_transcript_variant,intron_variant                                                   |
| rs1030172300 | intron_variant                                                                                     |
| rs1030179620 | genic_upstream_transcript_variant,intron_variant                                                   |
| rs1030210171 | intron_variant,genic_downstream_transcript_variant                                                 |
| rs1030214913 | intron_variant                                                                                     |
| rs1030223102 | intron_variant                                                                                     |
| rs1030233666 | genic_upstream_transcript_variant,intron_variant,2KB_upstream_variant,upstream_transcript_variant  |
| rs1030235572 | intron_variant,genic_downstream_transcript_variant                                                 |
| rs1030265438 | genic_upstream_transcript_variant,intron_variant                                                   |
| rs1030266080 | intron_variant                                                                                     |
| rs1030269221 | genic_upstream_transcript_variant,intron_variant                                                   |
| rs1030275194 | genic_upstream_transcript_variant,2KB_upstream_variant,intron_variant,upstream_transcript_variant  |
| rs1030306599 | intron_variant                                                                                     |
| rs1030313623 | genic_upstream_transcript_variant,intron_variant                                                   |
| rs1030316795 | intron_variant,genic_downstream_transcript_variant                                                 |
| rs1030372302 | non_coding_transcript_variant,genic_downstream_transcript_variant,3_prime_UTR_variant              |
| rs1030388726 | intron_variant,genic_downstream_transcript_variant                                                 |
| rs1030418561 | intron_variant                                                                                     |
| rs1030480151 | genic_upstream_transcript_variant,intron_variant                                                   |
| rs1030485541 | intron_variant                                                                                     |
| rs1030531848 | intron_variant                                                                                     |
| rs1030554153 | genic_upstream_transcript_variant,intron_variant,2KB_upstream_variant,upstream_transcript_variant  |
| rs1030568134 | genic_upstream_transcript_variant,intron_variant                                                   |
| rs1030575569 | non_coding_transcript_variant,genic_downstream_transcript_variant,3_prime_UTR_variant              |

|              |                                                                                                            |
|--------------|------------------------------------------------------------------------------------------------------------|
| rs1030587758 | intron_variant,genic_downstream_transcript_variant                                                         |
| rs1030593873 | intron_variant                                                                                             |
| rs1030628137 | genic_upstream_transcript_variant,intron_variant                                                           |
| rs1030657521 | intron_variant                                                                                             |
| rs1030672974 | intron_variant                                                                                             |
| rs1030693572 | intron_variant,genic_downstream_transcript_variant                                                         |
| rs1030716104 | genic_upstream_transcript_variant,intron_variant                                                           |
| rs1030771245 | genic_upstream_transcript_variant,intron_variant                                                           |
| rs1030777499 | intron_variant                                                                                             |
| rs1030793481 | genic_upstream_transcript_variant,intron_variant,upstream_transcript_variant                               |
| rs1030829199 | genic_upstream_transcript_variant,intron_variant                                                           |
| rs1030837751 | intron_variant                                                                                             |
| rs1030856165 | genic_upstream_transcript_variant,intron_variant                                                           |
| rs1030866678 | 5_prime_UTR_variant,intron_variant,upstream_transcript_variant,genic_upstream_transcript_variant           |
| rs1030879760 | genic_upstream_transcript_variant,intron_variant                                                           |
| rs1030995179 | genic_upstream_transcript_variant,intron_variant                                                           |
| rs1031010611 | intron_variant                                                                                             |
| rs1031030746 | intron_variant                                                                                             |
| rs1031058149 | intron_variant                                                                                             |
| rs1031098520 | genic_upstream_transcript_variant,intron_variant,2KB_upstream_variant,upstream_transcript_variant          |
| rs1031113005 | intron_variant                                                                                             |
| rs1031119318 | genic_upstream_transcript_variant,intron_variant                                                           |
| rs1031144960 | intron_variant,genic_downstream_transcript_variant                                                         |
| rs1031155122 | intron_variant,genic_downstream_transcript_variant                                                         |
| rs1031170535 | genic_upstream_transcript_variant,intron_variant,2KB_upstream_variant,upstream_transcript_variant          |
| rs1031201502 | genic_upstream_transcript_variant,intron_variant                                                           |
| rs1031231512 | intron_variant,genic_downstream_transcript_variant                                                         |
| rs1031263408 | genic_upstream_transcript_variant,intron_variant                                                           |
| rs1031263507 | non_coding_transcript_variant,missense_variant,genic_downstream_transcript_variant,coding_sequence_variant |
| rs1031283204 | intron_variant,genic_downstream_transcript_variant                                                         |
| rs1031316112 | intron_variant,genic_downstream_transcript_variant                                                         |
| rs1031346143 | intron_variant                                                                                             |
| rs1031373195 | intron_variant                                                                                             |
| rs1031395118 | intron_variant,genic_downstream_transcript_variant                                                         |
| rs1031434598 | genic_upstream_transcript_variant,intron_variant                                                           |
| rs1031445859 | intron_variant,genic_downstream_transcript_variant                                                         |
| rs1031483349 | intron_variant                                                                                             |
| rs1031487261 | intron_variant,genic_downstream_transcript_variant                                                         |
| rs1031500566 | genic_upstream_transcript_variant,intron_variant                                                           |
| rs1031574250 | intron_variant                                                                                             |
| rs1031587640 | intron_variant,genic_downstream_transcript_variant                                                         |
| rs1031644246 | genic_upstream_transcript_variant,intron_variant                                                           |
| rs1031646843 | genic_upstream_transcript_variant,intron_variant                                                           |
| rs1031650077 | non_coding_transcript_variant,missense_variant,coding_sequence_variant                                     |
| rs1031735122 | intron_variant                                                                                             |
| rs1031750115 | genic_upstream_transcript_variant,intron_variant                                                           |
| rs1031757866 | intron_variant                                                                                             |
| rs1031760756 | genic_upstream_transcript_variant,intron_variant                                                           |
| rs1031790401 | intron_variant                                                                                             |
| rs1031806731 | genic_upstream_transcript_variant,intron_variant                                                           |
| rs1031820555 | intron_variant                                                                                             |
| rs1031834689 | intron_variant,genic_downstream_transcript_variant                                                         |
| rs1031869637 | intron_variant,genic_downstream_transcript_variant                                                         |
| rs1031905651 | intron_variant,genic_downstream_transcript_variant                                                         |
| rs1031916783 | intron_variant                                                                                             |
| rs1031922585 | genic_upstream_transcript_variant,intron_variant                                                           |
| rs1031954191 | intron_variant                                                                                             |
| rs1032016537 | intron_variant                                                                                             |
| rs1032068467 | intron_variant                                                                                             |
| rs1032074450 | intron_variant,genic_downstream_transcript_variant                                                         |
| rs1032076507 | intron_variant                                                                                             |
| rs1032099049 | intron_variant                                                                                             |
| rs1032101638 | intron_variant                                                                                             |
| rs1032113840 | genic_upstream_transcript_variant,intron_variant                                                           |
| rs1032146739 | 5_prime_UTR_variant,intron_variant                                                                         |
| rs1032152380 | intron_variant                                                                                             |
| rs1032224964 | genic_upstream_transcript_variant,intron_variant,upstream_transcript_variant                               |
| rs1032249086 | genic_upstream_transcript_variant,intron_variant                                                           |
| rs1032251922 | genic_upstream_transcript_variant,intron_variant                                                           |
| rs1032263485 | intron_variant,genic_downstream_transcript_variant                                                         |
| rs1032342047 | intron_variant                                                                                             |
| rs1032401004 | genic_upstream_transcript_variant,intron_variant                                                           |
| rs1032423065 | intron_variant                                                                                             |
| rs1032438169 | genic_upstream_transcript_variant,intron_variant                                                           |

|              |                                                                                                                           |
|--------------|---------------------------------------------------------------------------------------------------------------------------|
| rs1032453528 | genic_upstream_transcript_variant,intron_variant                                                                          |
| rs1032481283 | intron_variant                                                                                                            |
| rs1032522458 | intron_variant,genic_downstream_transcript_variant                                                                        |
| rs1032539388 | intron_variant                                                                                                            |
| rs1032565691 | genic_upstream_transcript_variant,intron_variant                                                                          |
| rs1032573039 | intron_variant,genic_downstream_transcript_variant                                                                        |
| rs1032579261 | non_coding_transcript_variant,genic_downstream_transcript_variant,3_prime_UTR_variant                                     |
| rs1032592106 | intron_variant                                                                                                            |
| rs1032603208 | genic_upstream_transcript_variant,intron_variant                                                                          |
| rs1032630282 | non_coding_transcript_variant,genic_downstream_transcript_variant,3_prime_UTR_variant                                     |
| rs1032630644 | intron_variant                                                                                                            |
| rs1032678553 | genic_upstream_transcript_variant,intron_variant                                                                          |
| rs1032698519 | intron_variant                                                                                                            |
| rs1032751404 | intron_variant                                                                                                            |
| rs1032763257 | genic_upstream_transcript_variant,intron_variant                                                                          |
| rs1032789767 | intron_variant                                                                                                            |
| rs1032818382 | genic_upstream_transcript_variant,intron_variant                                                                          |
| rs1032840318 | intron_variant                                                                                                            |
| rs1032878990 | genic_upstream_transcript_variant,intron_variant                                                                          |
| rs1032893138 | non_coding_transcript_variant,genic_downstream_transcript_variant,3_prime_UTR_variant                                     |
| rs1032910944 | non_coding_transcript_variant,genic_downstream_transcript_variant,3_prime_UTR_variant                                     |
| rs1032914660 | genic_upstream_transcript_variant,intron_variant                                                                          |
| rs1032917885 | intron_variant                                                                                                            |
| rs1032983864 | intron_variant,genic_downstream_transcript_variant                                                                        |
| rs1033012361 | intron_variant,genic_downstream_transcript_variant                                                                        |
| rs1033019977 | intron_variant                                                                                                            |
| rs1033046853 | genic_upstream_transcript_variant,intron_variant                                                                          |
| rs1033093453 | intron_variant                                                                                                            |
| rs1033093988 | intron_variant,genic_downstream_transcript_variant                                                                        |
| rs1033109857 | genic_upstream_transcript_variant,intron_variant                                                                          |
| rs1033125769 | intron_variant                                                                                                            |
| rs1033129190 | intron_variant,genic_downstream_transcript_variant                                                                        |
| rs1033161787 | intron_variant,genic_downstream_transcript_variant                                                                        |
| rs1033166423 | genic_upstream_transcript_variant,intron_variant                                                                          |
| rs1033193067 | genic_upstream_transcript_variant,intron_variant                                                                          |
| rs1033201340 | genic_upstream_transcript_variant,intron_variant                                                                          |
| rs1033220658 | genic_upstream_transcript_variant,intron_variant                                                                          |
| rs1033232940 | intron_variant                                                                                                            |
| rs1033245540 | intron_variant,genic_downstream_transcript_variant                                                                        |
| rs1033274278 | genic_upstream_transcript_variant,intron_variant                                                                          |
| rs1033293858 | intron_variant                                                                                                            |
| rs1033326295 | genic_upstream_transcript_variant,intron_variant                                                                          |
| rs1033339393 | intron_variant,genic_downstream_transcript_variant                                                                        |
| rs1033389656 | genic_upstream_transcript_variant,intron_variant                                                                          |
| rs1033434044 | intron_variant,genic_downstream_transcript_variant                                                                        |
| rs1033439242 | genic_upstream_transcript_variant,intron_variant                                                                          |
| rs1033482028 | genic_upstream_transcript_variant,intron_variant                                                                          |
| rs1033507868 | genic_upstream_transcript_variant,intron_variant                                                                          |
| rs1033529036 | intron_variant                                                                                                            |
| rs1033556559 | intron_variant                                                                                                            |
| rs1033586067 | genic_upstream_transcript_variant,intron_variant,non_coding_transcript_variant,coding_sequence_variant,synonymous_variant |
| rs1033618759 | genic_upstream_transcript_variant,intron_variant                                                                          |
| rs1033649894 | genic_upstream_transcript_variant,2KB_upstream_variant,intron_variant,upstream_transcript_variant                         |
| rs1033741869 | intron_variant                                                                                                            |
| rs1033763374 | intron_variant                                                                                                            |
| rs1033764040 | genic_upstream_transcript_variant,intron_variant                                                                          |
| rs1033773677 | genic_upstream_transcript_variant,intron_variant                                                                          |
| rs1033829824 | genic_upstream_transcript_variant,intron_variant                                                                          |
| rs1033845243 | intron_variant                                                                                                            |
| rs1033847172 | non_coding_transcript_variant,genic_downstream_transcript_variant,3_prime_UTR_variant                                     |
| rs1033847643 | intron_variant,genic_downstream_transcript_variant                                                                        |
| rs1033874166 | intron_variant,genic_downstream_transcript_variant                                                                        |
| rs1033878007 | intron_variant                                                                                                            |
| rs1033891123 | genic_upstream_transcript_variant,intron_variant                                                                          |
| rs1033948381 | genic_upstream_transcript_variant,intron_variant                                                                          |
| rs1033954520 | genic_upstream_transcript_variant,intron_variant                                                                          |
| rs1034007893 | intron_variant                                                                                                            |
| rs1034010001 | intron_variant,genic_downstream_transcript_variant                                                                        |
| rs1034080480 | intron_variant                                                                                                            |
| rs1034081710 | intron_variant                                                                                                            |
| rs1034092517 | non_coding_transcript_variant,genic_downstream_transcript_variant,3_prime_UTR_variant                                     |
| rs1034111781 | genic_upstream_transcript_variant,intron_variant                                                                          |
| rs1034173206 | 500B_downstream_variant,downstream_transcript_variant                                                                     |
| rs1034186286 | genic_upstream_transcript_variant,intron_variant                                                                          |

|              |                                                                                                   |
|--------------|---------------------------------------------------------------------------------------------------|
| rs1034209838 | intron_variant,genic_downstream_transcript_variant                                                |
| rs1034212276 | intron_variant                                                                                    |
| rs1034259745 | genic_upstream_transcript_variant,intron_variant                                                  |
| rs1034260218 | genic_upstream_transcript_variant,intron_variant                                                  |
| rs1034287073 | intron_variant                                                                                    |
| rs1034313337 | genic_upstream_transcript_variant,intron_variant                                                  |
| rs1034364917 | intron_variant                                                                                    |
| rs1034411939 | genic_upstream_transcript_variant,2KB_upstream_variant,intron_variant,upstream_transcript_variant |
| rs1034429722 | intron_variant                                                                                    |
| rs1034453482 | intron_variant                                                                                    |
| rs1034484459 | intron_variant                                                                                    |
| rs1034491548 | intron_variant,genic_downstream_transcript_variant                                                |
| rs1034493969 | intron_variant,genic_downstream_transcript_variant                                                |
| rs1034506068 | genic_upstream_transcript_variant,2KB_upstream_variant,intron_variant,upstream_transcript_variant |
| rs1034512052 | genic_upstream_transcript_variant,intron_variant                                                  |
| rs1034552945 | genic_upstream_transcript_variant,intron_variant                                                  |
| rs1034591613 | non_coding_transcript_variant,genic_downstream_transcript_variant,3_prime_UTR_variant             |
| rs1034599668 | intron_variant,genic_downstream_transcript_variant                                                |
| rs1034648942 | intron_variant                                                                                    |
| rs1034767860 | intron_variant                                                                                    |
| rs1034782473 | genic_upstream_transcript_variant,intron_variant                                                  |
| rs1034798455 | intron_variant                                                                                    |
| rs1034812133 | intron_variant,genic_downstream_transcript_variant                                                |
| rs1034855737 | genic_upstream_transcript_variant,intron_variant,2KB_upstream_variant,upstream_transcript_variant |
| rs1034881262 | intron_variant,genic_downstream_transcript_variant                                                |
| rs1034885462 | genic_upstream_transcript_variant,intron_variant,2KB_upstream_variant,upstream_transcript_variant |
| rs1034894536 | genic_upstream_transcript_variant,intron_variant                                                  |
| rs1034897941 | genic_upstream_transcript_variant,intron_variant                                                  |
| rs1034927469 | intron_variant,genic_downstream_transcript_variant                                                |
| rs1034950470 | genic_upstream_transcript_variant,intron_variant                                                  |
| rs1034957774 | intron_variant                                                                                    |
| rs1035000028 | genic_upstream_transcript_variant,intron_variant                                                  |
| rs1035010240 | genic_upstream_transcript_variant,2KB_upstream_variant,intron_variant,upstream_transcript_variant |
| rs1035020677 | intron_variant                                                                                    |
| rs1035030065 | intron_variant                                                                                    |
| rs1035050733 | intron_variant                                                                                    |
| rs1035067685 | genic_upstream_transcript_variant,intron_variant                                                  |
| rs1035075983 | intron_variant                                                                                    |
| rs1035077217 | genic_upstream_transcript_variant,intron_variant                                                  |
| rs1035108474 | genic_upstream_transcript_variant,intron_variant                                                  |
| rs1035134879 | intron_variant                                                                                    |
| rs1035141881 | intron_variant,genic_downstream_transcript_variant                                                |
| rs1035152966 | intron_variant                                                                                    |
| rs1035163860 | genic_upstream_transcript_variant,intron_variant                                                  |
| rs1035172009 | genic_upstream_transcript_variant,intron_variant                                                  |
| rs1035176160 | genic_upstream_transcript_variant,intron_variant                                                  |
| rs1035193531 | genic_upstream_transcript_variant,intron_variant                                                  |
| rs1035203710 | intron_variant                                                                                    |
| rs1035221677 | genic_upstream_transcript_variant,intron_variant                                                  |
| rs1035242854 | intron_variant,genic_downstream_transcript_variant                                                |
| rs1035266703 | genic_upstream_transcript_variant,intron_variant                                                  |
| rs1035269753 | intron_variant                                                                                    |
| rs1035285721 | genic_upstream_transcript_variant,intron_variant                                                  |
| rs1035338828 | intron_variant                                                                                    |
| rs1035359221 | intron_variant                                                                                    |
| rs1035416475 | genic_upstream_transcript_variant,2KB_upstream_variant,intron_variant,upstream_transcript_variant |
| rs1035428773 | genic_upstream_transcript_variant,intron_variant                                                  |
| rs1035439339 | intron_variant                                                                                    |
| rs1035446734 | intron_variant,genic_downstream_transcript_variant                                                |
| rs1035456694 | intron_variant                                                                                    |
| rs1035473466 | genic_upstream_transcript_variant,intron_variant                                                  |
| rs1035481584 | intron_variant,genic_downstream_transcript_variant                                                |
| rs1035487883 | intron_variant                                                                                    |
| rs1035496340 | genic_upstream_transcript_variant,intron_variant                                                  |
| rs1035496938 | genic_upstream_transcript_variant,intron_variant                                                  |
| rs1035509794 | genic_upstream_transcript_variant,intron_variant                                                  |
| rs1035529833 | genic_upstream_transcript_variant,intron_variant                                                  |
| rs1035541992 | intron_variant                                                                                    |
| rs1035573539 | genic_upstream_transcript_variant,intron_variant                                                  |
| rs1035648150 | genic_upstream_transcript_variant,2KB_upstream_variant,intron_variant,upstream_transcript_variant |
| rs1035676006 | genic_upstream_transcript_variant,intron_variant                                                  |
| rs1035699869 | genic_upstream_transcript_variant,intron_variant                                                  |
| rs1035709000 | intron_variant                                                                                    |
| rs1035744630 | intron_variant,genic_downstream_transcript_variant                                                |

|              |                                                                                                    |
|--------------|----------------------------------------------------------------------------------------------------|
| rs1035747846 | genic_upstream_transcript_variant,2KB_upstream_variant,intron_variant,upstream_transcript_variant  |
| rs1035765584 | genic_upstream_transcript_variant,intron_variant                                                   |
| rs1035786903 | intron_variant,genic_downstream_transcript_variant                                                 |
| rs1035857913 | genic_upstream_transcript_variant,intron_variant                                                   |
| rs1035871824 | intron_variant                                                                                     |
| rs1035899318 | intron_variant                                                                                     |
| rs1035950860 | intron_variant                                                                                     |
| rs1035964851 | intron_variant                                                                                     |
| rs1036005283 | genic_upstream_transcript_variant,intron_variant,upstream_transcript_variant                       |
| rs1036008496 | intron_variant                                                                                     |
| rs1036031688 | genic_upstream_transcript_variant,intron_variant                                                   |
| rs1036059471 | intron_variant                                                                                     |
| rs1036077780 | intron_variant,genic_downstream_transcript_variant                                                 |
| rs1036086324 | intron_variant                                                                                     |
| rs1036091704 | intron_variant                                                                                     |
| rs1036106957 | intron_variant                                                                                     |
| rs1036164388 | genic_upstream_transcript_variant,intron_variant,2KB_upstream_variant,upstream_transcript_variant  |
| rs1036232217 | intron_variant,genic_downstream_transcript_variant                                                 |
| rs1036242526 | intron_variant                                                                                     |
| rs1036257863 | intron_variant,genic_downstream_transcript_variant                                                 |
| rs1036262060 | genic_upstream_transcript_variant,intron_variant,2KB_upstream_variant,upstream_transcript_variant  |
| rs1036264842 | intron_variant,genic_downstream_transcript_variant                                                 |
| rs1036311216 | genic_upstream_transcript_variant,intron_variant                                                   |
| rs1036326563 | intron_variant                                                                                     |
| rs1036362708 | intron_variant                                                                                     |
| rs1036406092 | genic_upstream_transcript_variant,intron_variant                                                   |
| rs1036427504 | intron_variant                                                                                     |
| rs1036462229 | genic_upstream_transcript_variant,intron_variant                                                   |
| rs1036490359 | genic_upstream_transcript_variant,intron_variant                                                   |
| rs1036504133 | genic_upstream_transcript_variant,intron_variant                                                   |
| rs1036506753 | intron_variant                                                                                     |
| rs1036606502 | genic_upstream_transcript_variant,intron_variant                                                   |
| rs1036618644 | genic_upstream_transcript_variant,intron_variant                                                   |
| rs1036649236 | genic_upstream_transcript_variant,intron_variant                                                   |
| rs1036653866 | 2KB_upstream_variant,genic_upstream_transcript_variant,upstream_transcript_variant,intron_variant  |
| rs1036688328 | genic_upstream_transcript_variant,intron_variant                                                   |
| rs1036692417 | genic_upstream_transcript_variant,intron_variant                                                   |
| rs1036716154 | genic_downstream_transcript_variant,intron_variant                                                 |
| rs1036757961 | 2KB_upstream_variant,genic_upstream_transcript_variant,upstream_transcript_variant,intron_variant  |
| rs1036790423 | genic_downstream_transcript_variant,intron_variant                                                 |
| rs1036800474 | intron_variant                                                                                     |
| rs1036849719 | 2KB_upstream_variant,genic_upstream_transcript_variant,upstream_transcript_variant,intron_variant  |
| rs1036850647 | intron_variant                                                                                     |
| rs1036917823 | 2KB_upstream_variant,genic_upstream_transcript_variant,upstream_transcript_variant,intron_variant  |
| rs1036950595 | genic_upstream_transcript_variant,intron_variant                                                   |
| rs1036951032 | genic_upstream_transcript_variant,intron_variant                                                   |
| rs1036977643 | genic_upstream_transcript_variant,intron_variant                                                   |
| rs1036990064 | 5_prime_UTR_variant,non_coding_transcript_variant,genic_upstream_transcript_variant,intron_variant |
| rs1037001310 | 2KB_upstream_variant,genic_upstream_transcript_variant,upstream_transcript_variant,intron_variant  |
| rs1037035129 | genic_upstream_transcript_variant,intron_variant                                                   |
| rs1037048542 | intron_variant                                                                                     |
| rs1037051057 | genic_downstream_transcript_variant,intron_variant                                                 |
| rs1037064829 | intron_variant                                                                                     |
| rs1037160741 | intron_variant                                                                                     |
| rs1037209874 | intron_variant                                                                                     |
| rs1037251078 | intron_variant                                                                                     |
| rs1037256692 | genic_upstream_transcript_variant,intron_variant                                                   |
| rs1037320468 | genic_upstream_transcript_variant,intron_variant                                                   |
| rs1037333149 | genic_downstream_transcript_variant,intron_variant                                                 |
| rs1037349391 | genic_upstream_transcript_variant,intron_variant                                                   |
| rs1037393215 | genic_downstream_transcript_variant,intron_variant                                                 |
| rs1037394144 | genic_upstream_transcript_variant,intron_variant                                                   |
| rs1037471526 | intron_variant                                                                                     |
| rs1037482399 | genic_upstream_transcript_variant,intron_variant                                                   |
| rs1037500697 | intron_variant                                                                                     |
| rs1037502939 | intron_variant                                                                                     |
| rs1037512411 | genic_upstream_transcript_variant,intron_variant                                                   |
| rs1037520287 | genic_upstream_transcript_variant,intron_variant                                                   |
| rs1037566894 | genic_upstream_transcript_variant,intron_variant                                                   |
| rs1037649219 | intron_variant                                                                                     |
| rs1037653419 | genic_downstream_transcript_variant,intron_variant                                                 |
| rs1037660316 | genic_upstream_transcript_variant,intron_variant                                                   |
| rs1037721615 | genic_downstream_transcript_variant,intron_variant                                                 |
| rs1037737076 | intron_variant                                                                                     |

|              |                                                                                       |
|--------------|---------------------------------------------------------------------------------------|
| rs1037745449 | intron_variant                                                                        |
| rs1037760424 | genic_upstream_transcript_variant,intron_variant                                      |
| rs1037826507 | genic_upstream_transcript_variant,intron_variant                                      |
| rs1037855193 | genic_downstream_transcript_variant,intron_variant                                    |
| rs1037864879 | intron_variant                                                                        |
| rs1037882420 | intron_variant                                                                        |
| rs1037905388 | genic_upstream_transcript_variant,intron_variant                                      |
| rs1037946581 | intron_variant                                                                        |
| rs1037946700 | genic_downstream_transcript_variant,intron_variant                                    |
| rs1037961345 | genic_upstream_transcript_variant,intron_variant                                      |
| rs1037970707 | genic_upstream_transcript_variant,intron_variant                                      |
| rs1038009299 | genic_upstream_transcript_variant,intron_variant                                      |
| rs1038057921 | genic_downstream_transcript_variant,intron_variant                                    |
| rs1038075119 | genic_downstream_transcript_variant,intron_variant                                    |
| rs1038080366 | intron_variant                                                                        |
| rs1038093717 | genic_downstream_transcript_variant,intron_variant                                    |
| rs1038136314 | genic_downstream_transcript_variant,intron_variant                                    |
| rs1038158300 | genic_downstream_transcript_variant,intron_variant                                    |
| rs1038165255 | intron_variant                                                                        |
| rs1038191047 | genic_downstream_transcript_variant,intron_variant                                    |
| rs1038238179 | genic_upstream_transcript_variant,intron_variant                                      |
| rs1038247061 | genic_downstream_transcript_variant,intron_variant                                    |
| rs1038247997 | intron_variant                                                                        |
| rs1038280819 | intron_variant                                                                        |
| rs1038296740 | intron_variant                                                                        |
| rs1038326478 | intron_variant                                                                        |
| rs1038327109 | genic_downstream_transcript_variant,intron_variant                                    |
| rs1038339616 | genic_upstream_transcript_variant,intron_variant                                      |
| rs1038358197 | intron_variant                                                                        |
| rs1038414674 | genic_upstream_transcript_variant,intron_variant                                      |
| rs1038419114 | intron_variant                                                                        |
| rs1038432955 | intron_variant                                                                        |
| rs1038446960 | genic_upstream_transcript_variant,intron_variant                                      |
| rs1038484467 | genic_upstream_transcript_variant,intron_variant                                      |
| rs1038505560 | genic_upstream_transcript_variant,intron_variant                                      |
| rs1038549138 | genic_upstream_transcript_variant,intron_variant                                      |
| rs1038595675 | intron_variant                                                                        |
| rs1038640033 | genic_upstream_transcript_variant,intron_variant                                      |
| rs1038647344 | genic_upstream_transcript_variant,intron_variant                                      |
| rs1038676535 | genic_upstream_transcript_variant,intron_variant                                      |
| rs1038680326 | genic_downstream_transcript_variant,intron_variant                                    |
| rs1038683390 | genic_downstream_transcript_variant,intron_variant                                    |
| rs1038704235 | genic_upstream_transcript_variant,intron_variant                                      |
| rs1038732024 | genic_upstream_transcript_variant,intron_variant                                      |
| rs1038782604 | genic_downstream_transcript_variant,intron_variant                                    |
| rs1038802243 | intron_variant                                                                        |
| rs1038804061 | intron_variant                                                                        |
| rs1038809715 | intron_variant                                                                        |
| rs1038825040 | genic_downstream_transcript_variant,non_coding_transcript_variant,3_prime_UTR_variant |
| rs1038845936 | genic_upstream_transcript_variant,intron_variant                                      |
| rs1038856847 | intron_variant                                                                        |
| rs1038900924 | genic_upstream_transcript_variant,intron_variant                                      |
| rs1038933093 | genic_upstream_transcript_variant,intron_variant                                      |
| rs1039009466 | genic_downstream_transcript_variant,intron_variant                                    |
| rs1039016616 | intron_variant                                                                        |
| rs1039111271 | intron_variant                                                                        |
| rs1039123266 | intron_variant                                                                        |
| rs1039127338 | genic_upstream_transcript_variant,intron_variant                                      |
| rs1039176355 | genic_upstream_transcript_variant,intron_variant                                      |
| rs1039176965 | intron_variant                                                                        |
| rs1039181500 | genic_upstream_transcript_variant,intron_variant                                      |
| rs1039187814 | intron_variant                                                                        |
| rs1039216160 | genic_downstream_transcript_variant,intron_variant                                    |
| rs1039219244 | genic_upstream_transcript_variant,intron_variant                                      |
| rs1039221415 | genic_downstream_transcript_variant,intron_variant                                    |
| rs1039223728 | intron_variant                                                                        |
| rs1039233939 | genic_upstream_transcript_variant,intron_variant                                      |
| rs1039293658 | genic_downstream_transcript_variant,intron_variant                                    |
| rs1039312371 | intron_variant                                                                        |
| rs1039312993 | genic_upstream_transcript_variant,intron_variant                                      |
| rs1039313707 | genic_downstream_transcript_variant,non_coding_transcript_variant,3_prime_UTR_variant |
| rs1039349451 | genic_upstream_transcript_variant,intron_variant                                      |
| rs1039379981 | genic_upstream_transcript_variant,intron_variant                                      |
| rs1039383510 | intron_variant                                                                        |

|              |                                                                                                   |
|--------------|---------------------------------------------------------------------------------------------------|
| rs1039387100 | genic_downstream_transcript_variant,intron_variant                                                |
| rs1039410000 | genic_downstream_transcript_variant,intron_variant                                                |
| rs1039414818 | intron_variant                                                                                    |
| rs1039424369 | genic_downstream_transcript_variant,intron_variant                                                |
| rs1039499440 | intron_variant                                                                                    |
| rs1039500672 | intron_variant                                                                                    |
| rs1039548882 | genic_upstream_transcript_variant,intron_variant                                                  |
| rs1039561429 | intron_variant                                                                                    |
| rs1039568338 | genic_upstream_transcript_variant,intron_variant                                                  |
| rs1039616723 | intron_variant                                                                                    |
| rs1039629132 | genic_downstream_transcript_variant,intron_variant                                                |
| rs1039630031 | genic_downstream_transcript_variant,intron_variant                                                |
| rs1039637619 | genic_upstream_transcript_variant,intron_variant                                                  |
| rs1039642009 | genic_upstream_transcript_variant,intron_variant                                                  |
| rs1039651764 | genic_upstream_transcript_variant,intron_variant                                                  |
| rs1039667815 | intron_variant                                                                                    |
| rs1039688347 | intron_variant                                                                                    |
| rs1039739519 | intron_variant                                                                                    |
| rs1039739932 | intron_variant                                                                                    |
| rs1039753743 | genic_upstream_transcript_variant,intron_variant                                                  |
| rs1039756141 | genic_upstream_transcript_variant,intron_variant                                                  |
| rs1039786048 | genic_upstream_transcript_variant,intron_variant                                                  |
| rs1039829767 | genic_upstream_transcript_variant,intron_variant                                                  |
| rs1039836444 | intron_variant                                                                                    |
| rs1039840986 | genic_upstream_transcript_variant,intron_variant                                                  |
| rs1039885513 | intron_variant                                                                                    |
| rs1039890932 | intron_variant                                                                                    |
| rs1039917557 | genic_upstream_transcript_variant,intron_variant                                                  |
| rs1039967914 | intron_variant                                                                                    |
| rs1040051638 | intron_variant                                                                                    |
| rs1040084559 | genic_downstream_transcript_variant,intron_variant                                                |
| rs1040089268 | genic_downstream_transcript_variant,intron_variant                                                |
| rs1040099445 | intron_variant                                                                                    |
| rs1040121697 | intron_variant                                                                                    |
| rs1040142298 | intron_variant                                                                                    |
| rs1040167967 | 2KB_upstream_variant,genic_upstream_transcript_variant,upstream_transcript_variant,intron_variant |
| rs1040175213 | intron_variant                                                                                    |
| rs1040193130 | intron_variant                                                                                    |
| rs1040203556 | genic_upstream_transcript_variant,intron_variant                                                  |
| rs1040223731 | intron_variant                                                                                    |
| rs1040226197 | genic_upstream_transcript_variant,intron_variant                                                  |
| rs1040233509 | intron_variant                                                                                    |
| rs1040260756 | 2KB_upstream_variant,genic_upstream_transcript_variant,upstream_transcript_variant,intron_variant |
| rs1040290269 | intron_variant                                                                                    |
| rs1040361641 | genic_downstream_transcript_variant,intron_variant                                                |
| rs1040398598 | genic_upstream_transcript_variant,intron_variant                                                  |
| rs1040401415 | genic_upstream_transcript_variant,intron_variant                                                  |
| rs1040454040 | intron_variant                                                                                    |
| rs1040484267 | genic_upstream_transcript_variant,intron_variant                                                  |
| rs1040553171 | genic_upstream_transcript_variant,intron_variant                                                  |
| rs1040577560 | genic_upstream_transcript_variant,intron_variant                                                  |
| rs1040585823 | genic_downstream_transcript_variant,non_coding_transcript_variant,3_prime_UTR_variant             |
| rs1040611641 | genic_upstream_transcript_variant,intron_variant                                                  |
| rs1040612180 | intron_variant                                                                                    |
| rs1040616355 | genic_upstream_transcript_variant,intron_variant                                                  |
| rs1040619810 | intron_variant                                                                                    |
| rs1040707623 | genic_downstream_transcript_variant,intron_variant                                                |
| rs1040758056 | genic_upstream_transcript_variant,intron_variant                                                  |
| rs1040775732 | intron_variant                                                                                    |
| rs1040847937 | intron_variant                                                                                    |
| rs1040858792 | genic_downstream_transcript_variant,intron_variant                                                |
| rs1040901649 | genic_upstream_transcript_variant,intron_variant                                                  |
| rs1040926195 | genic_upstream_transcript_variant,intron_variant                                                  |
| rs1040953314 | genic_downstream_transcript_variant,intron_variant                                                |
| rs1040953976 | genic_upstream_transcript_variant,intron_variant                                                  |
| rs1040998158 | intron_variant                                                                                    |
| rs1041001234 | intron_variant                                                                                    |
| rs1041018209 | genic_upstream_transcript_variant,intron_variant                                                  |
| rs1041035286 | genic_downstream_transcript_variant,intron_variant                                                |
| rs1041035833 | genic_downstream_transcript_variant,non_coding_transcript_variant,3_prime_UTR_variant             |
| rs1041039478 | intron_variant                                                                                    |
| rs1041063070 | intron_variant                                                                                    |
| rs1041077971 | intron_variant                                                                                    |
| rs1041154057 | genic_upstream_transcript_variant,intron_variant                                                  |

|              |                                                                                                    |
|--------------|----------------------------------------------------------------------------------------------------|
| rs1041194087 | intron_variant                                                                                     |
| rs1041240263 | intron_variant                                                                                     |
| rs1041241392 | genic_downstream_transcript_variant,intron_variant                                                 |
| rs1041316843 | genic_downstream_transcript_variant,intron_variant                                                 |
| rs1041317169 | genic_downstream_transcript_variant,intron_variant                                                 |
| rs1041320020 | intron_variant                                                                                     |
| rs1041400087 | genic_downstream_transcript_variant,intron_variant                                                 |
| rs1041415665 | genic_upstream_transcript_variant,intron_variant                                                   |
| rs1041423745 | 500B_downstream_variant,downstream_transcript_variant                                              |
| rs1041452734 | genic_downstream_transcript_variant,intron_variant                                                 |
| rs1041497799 | genic_downstream_transcript_variant,intron_variant                                                 |
| rs1041538717 | intron_variant                                                                                     |
| rs1041566754 | genic_upstream_transcript_variant,intron_variant                                                   |
| rs1041571619 | intron_variant                                                                                     |
| rs1041597488 | genic_upstream_transcript_variant,intron_variant                                                   |
| rs1041599369 | genic_upstream_transcript_variant,intron_variant                                                   |
| rs1041686512 | intron_variant                                                                                     |
| rs1041769196 | intron_variant                                                                                     |
| rs1041775939 | intron_variant                                                                                     |
| rs1041801500 | intron_variant                                                                                     |
| rs1041813771 | intron_variant                                                                                     |
| rs1041836036 | genic_upstream_transcript_variant,intron_variant                                                   |
| rs1041852335 | intron_variant                                                                                     |
| rs1041875366 | genic_downstream_transcript_variant,intron_variant                                                 |
| rs1041926507 | genic_downstream_transcript_variant,intron_variant                                                 |
| rs1041927454 | intron_variant                                                                                     |
| rs1041936242 | genic_upstream_transcript_variant,intron_variant                                                   |
| rs1041978884 | genic_downstream_transcript_variant,intron_variant                                                 |
| rs1041997097 | 5_prime_UTR_variant,non_coding_transcript_variant,genic_upstream_transcript_variant,intron_variant |
| rs1041999943 | genic_downstream_transcript_variant,intron_variant                                                 |
| rs1042049674 | genic_downstream_transcript_variant,intron_variant                                                 |
| rs1042056480 | genic_upstream_transcript_variant,intron_variant                                                   |
| rs1042096538 | genic_downstream_transcript_variant,intron_variant                                                 |
| rs1042151073 | 2KB_upstream_variant,genic_upstream_transcript_variant,upstream_transcript_variant,intron_variant  |
| rs1042157413 | genic_downstream_transcript_variant,intron_variant                                                 |
| rs1042158891 | intron_variant                                                                                     |
| rs1042160259 | intron_variant                                                                                     |
| rs1042168499 | intron_variant                                                                                     |
| rs1042183831 | intron_variant                                                                                     |
| rs1042184480 | genic_downstream_transcript_variant,intron_variant                                                 |
| rs1042188830 | intron_variant                                                                                     |
| rs1042192416 | genic_upstream_transcript_variant,intron_variant                                                   |
| rs1042252412 | genic_downstream_transcript_variant,intron_variant                                                 |
| rs1042256787 | intron_variant                                                                                     |
| rs1042313258 | intron_variant                                                                                     |
| rs1042321479 | intron_variant                                                                                     |
| rs1042328620 | genic_upstream_transcript_variant,intron_variant                                                   |
| rs1042343576 | intron_variant                                                                                     |
| rs1042364001 | genic_upstream_transcript_variant,intron_variant                                                   |
| rs1042381614 | genic_upstream_transcript_variant,intron_variant                                                   |
| rs1042393855 | genic_upstream_transcript_variant,intron_variant                                                   |
| rs1042394876 | genic_upstream_transcript_variant,intron_variant                                                   |
| rs1042512220 | 2KB_upstream_variant,genic_upstream_transcript_variant,upstream_transcript_variant,intron_variant  |
| rs1042540370 | genic_upstream_transcript_variant,intron_variant                                                   |
| rs1042546144 | intron_variant                                                                                     |
| rs1042558664 | genic_downstream_transcript_variant,intron_variant                                                 |
| rs1042582075 | genic_downstream_transcript_variant,intron_variant                                                 |
| rs1042609132 | genic_downstream_transcript_variant,intron_variant                                                 |
| rs1042664105 | upstream_transcript_variant,genic_upstream_transcript_variant,intron_variant                       |
| rs1042674323 | genic_upstream_transcript_variant,intron_variant                                                   |
| rs1042716568 | intron_variant                                                                                     |
| rs1042717998 | genic_upstream_transcript_variant,intron_variant                                                   |
| rs1042719370 | upstream_transcript_variant,genic_upstream_transcript_variant,intron_variant                       |
| rs1042753565 | intron_variant                                                                                     |
| rs1042763323 | intron_variant                                                                                     |
| rs1042804993 | intron_variant                                                                                     |
| rs1042838814 | intron_variant                                                                                     |
| rs1042844471 | intron_variant                                                                                     |
| rs1042862349 | intron_variant                                                                                     |
| rs1042871389 | genic_upstream_transcript_variant,intron_variant                                                   |
| rs1042922584 | genic_downstream_transcript_variant,intron_variant                                                 |
| rs1042965118 | intron_variant                                                                                     |
| rs1042993146 | genic_downstream_transcript_variant,intron_variant                                                 |
| rs1043013675 | intron_variant                                                                                     |

|              |                                                                                                                           |
|--------------|---------------------------------------------------------------------------------------------------------------------------|
| rs1043054385 | genic_upstream_transcript_variant,intron_variant                                                                          |
| rs1043059956 | genic_upstream_transcript_variant,intron_variant                                                                          |
| rs1043063898 | intron_variant                                                                                                            |
| rs1043088645 | genic_upstream_transcript_variant,intron_variant                                                                          |
| rs1043116150 | genic_upstream_transcript_variant,intron_variant                                                                          |
| rs1043210829 | intron_variant                                                                                                            |
| rs1043267261 | intron_variant                                                                                                            |
| rs1043327639 | genic_upstream_transcript_variant,intron_variant                                                                          |
| rs1043338874 | genic_upstream_transcript_variant,intron_variant                                                                          |
| rs1043376078 | intron_variant                                                                                                            |
| rs1043411902 | genic_upstream_transcript_variant,intron_variant                                                                          |
| rs1043423174 | genic_upstream_transcript_variant,intron_variant                                                                          |
| rs1043432005 | intron_variant                                                                                                            |
| rs1043456596 | intron_variant                                                                                                            |
| rs1043521749 | genic_upstream_transcript_variant,intron_variant                                                                          |
| rs1043624334 | genic_upstream_transcript_variant,intron_variant                                                                          |
| rs1043676662 | genic_upstream_transcript_variant,intron_variant                                                                          |
| rs1043717215 | genic_downstream_transcript_variant,intron_variant                                                                        |
| rs1043777124 | genic_downstream_transcript_variant,intron_variant                                                                        |
| rs1043791312 | intron_variant                                                                                                            |
| rs1043839541 | intron_variant                                                                                                            |
| rs1043859824 | genic_downstream_transcript_variant,intron_variant                                                                        |
| rs1043866412 | intron_variant                                                                                                            |
| rs1043907705 | genic_upstream_transcript_variant,intron_variant                                                                          |
| rs1043914584 | genic_upstream_transcript_variant,intron_variant                                                                          |
| rs1043926428 | genic_upstream_transcript_variant,intron_variant                                                                          |
| rs1043931745 | genic_downstream_transcript_variant,intron_variant                                                                        |
| rs1043940149 | genic_upstream_transcript_variant,intron_variant                                                                          |
| rs1043941272 | genic_upstream_transcript_variant,intron_variant                                                                          |
| rs1043958781 | genic_upstream_transcript_variant,intron_variant                                                                          |
| rs1043977438 | genic_upstream_transcript_variant,intron_variant                                                                          |
| rs1044031827 | genic_upstream_transcript_variant,intron_variant                                                                          |
| rs1044064691 | intron_variant                                                                                                            |
| rs1044065855 | 2KB_upstream_variant,genic_upstream_transcript_variant,upstream_transcript_variant,intron_variant                         |
| rs1044096407 | 5_prime_UTR_variant,non_coding_transcript_variant,genic_upstream_transcript_variant,intron_variant                        |
| rs1044102479 | genic_downstream_transcript_variant,intron_variant                                                                        |
| rs1044112121 | intron_variant                                                                                                            |
| rs1044114913 | genic_downstream_transcript_variant,intron_variant                                                                        |
| rs1044151782 | genic_upstream_transcript_variant,intron_variant                                                                          |
| rs1044203064 | genic_upstream_transcript_variant,intron_variant                                                                          |
| rs1044216331 | genic_upstream_transcript_variant,intron_variant                                                                          |
| rs1044246534 | genic_downstream_transcript_variant,intron_variant                                                                        |
| rs1044263405 | intron_variant                                                                                                            |
| rs1044287384 | genic_downstream_transcript_variant,intron_variant                                                                        |
| rs1044323253 | upstream_transcript_variant,genic_upstream_transcript_variant,intron_variant                                              |
| rs1044331420 | intron_variant                                                                                                            |
| rs1044335345 | intron_variant                                                                                                            |
| rs1044380628 | genic_upstream_transcript_variant,intron_variant                                                                          |
| rs1044405350 | intron_variant                                                                                                            |
| rs1044441427 | genic_upstream_transcript_variant,intron_variant                                                                          |
| rs1044455261 | genic_upstream_transcript_variant,intron_variant                                                                          |
| rs1044455778 | intron_variant                                                                                                            |
| rs1044490663 | genic_upstream_transcript_variant,intron_variant                                                                          |
| rs1044541563 | genic_upstream_transcript_variant,intron_variant                                                                          |
| rs1044549495 | genic_upstream_transcript_variant,intron_variant                                                                          |
| rs1044566601 | intron_variant                                                                                                            |
| rs1044600148 | intron_variant                                                                                                            |
| rs1044616410 | coding_sequence_variant,non_coding_transcript_variant,synonymous_variant,genic_upstream_transcript_variant,intron_variant |
| rs1044636210 | intron_variant                                                                                                            |
| rs1044654231 | intron_variant                                                                                                            |
| rs1044673640 | intron_variant                                                                                                            |
| rs1044710199 | intron_variant                                                                                                            |
| rs1044724117 | genic_upstream_transcript_variant,intron_variant                                                                          |
| rs1044741459 | intron_variant                                                                                                            |
| rs1044777916 | genic_upstream_transcript_variant,intron_variant                                                                          |
| rs1044791827 | genic_upstream_transcript_variant,intron_variant                                                                          |
| rs1044794191 | intron_variant                                                                                                            |
| rs1044802714 | intron_variant                                                                                                            |
| rs1044823415 | genic_downstream_transcript_variant,intron_variant                                                                        |
| rs1044841579 | genic_upstream_transcript_variant,intron_variant                                                                          |
| rs1044855801 | intron_variant                                                                                                            |
| rs1044872868 | genic_upstream_transcript_variant,intron_variant                                                                          |
| rs1044901844 | genic_upstream_transcript_variant,intron_variant                                                                          |
| rs1044938124 | intron_variant                                                                                                            |

|              |                                                                                                   |
|--------------|---------------------------------------------------------------------------------------------------|
| rs1044966393 | intron_variant                                                                                    |
| rs1044967809 | genic_downstream_transcript_variant,intron_variant                                                |
| rs1044969976 | intron_variant                                                                                    |
| rs1045025593 | genic_downstream_transcript_variant,intron_variant                                                |
| rs1045066002 | genic_downstream_transcript_variant,intron_variant                                                |
| rs1045066985 | intron_variant                                                                                    |
| rs1045100213 | genic_upstream_transcript_variant,intron_variant                                                  |
| rs1045126981 | genic_upstream_transcript_variant,intron_variant                                                  |
| rs1045133464 | genic_downstream_transcript_variant,intron_variant                                                |
| rs1045133691 | genic_upstream_transcript_variant,intron_variant                                                  |
| rs1045148901 | intron_variant                                                                                    |
| rs1045188143 | genic_downstream_transcript_variant,intron_variant                                                |
| rs1045204938 | intron_variant                                                                                    |
| rs1045207259 | genic_downstream_transcript_variant,intron_variant                                                |
| rs1045207332 | genic_downstream_transcript_variant,intron_variant                                                |
| rs1045217828 | intron_variant                                                                                    |
| rs1045222640 | genic_upstream_transcript_variant,intron_variant                                                  |
| rs1045304873 | intron_variant                                                                                    |
| rs1045307158 | genic_upstream_transcript_variant,intron_variant                                                  |
| rs1045342179 | genic_downstream_transcript_variant,intron_variant                                                |
| rs1045350796 | intron_variant                                                                                    |
| rs1045381851 | intron_variant                                                                                    |
| rs1045408849 | 2KB_upstream_variant,genic_upstream_transcript_variant,upstream_transcript_variant,intron_variant |
| rs1045419307 | genic_downstream_transcript_variant,intron_variant                                                |
| rs1045448822 | genic_upstream_transcript_variant,intron_variant                                                  |
| rs1045470343 | genic_downstream_transcript_variant,intron_variant                                                |
| rs1045483135 | genic_upstream_transcript_variant,intron_variant                                                  |
| rs1045483910 | genic_downstream_transcript_variant,intron_variant                                                |
| rs1045485187 | intron_variant                                                                                    |
| rs1045520126 | genic_downstream_transcript_variant,intron_variant                                                |
| rs1045541260 | genic_downstream_transcript_variant,intron_variant                                                |
| rs1045636106 | genic_downstream_transcript_variant,non_coding_transcript_variant,3_prime_UTR_variant             |
| rs1045667680 | genic_upstream_transcript_variant,intron_variant                                                  |
| rs1045674282 | intron_variant                                                                                    |
| rs1045723046 | intron_variant                                                                                    |
| rs1045739680 | genic_upstream_transcript_variant,intron_variant                                                  |
| rs1045743701 | genic_upstream_transcript_variant,intron_variant                                                  |
| rs1045746059 | genic_downstream_transcript_variant,intron_variant                                                |
| rs1045750572 | genic_upstream_transcript_variant,intron_variant                                                  |
| rs1045791936 | genic_upstream_transcript_variant,intron_variant                                                  |
| rs1045806858 | genic_upstream_transcript_variant,intron_variant                                                  |
| rs1045809520 | genic_downstream_transcript_variant,intron_variant                                                |
| rs1045887472 | genic_downstream_transcript_variant,intron_variant                                                |
| rs1045906455 | genic_upstream_transcript_variant,intron_variant                                                  |
| rs1045939518 | intron_variant                                                                                    |
| rs1045954622 | intron_variant                                                                                    |
| rs1045962858 | genic_upstream_transcript_variant,intron_variant                                                  |
| rs1045986309 | intron_variant                                                                                    |
| rs1046021524 | genic_upstream_transcript_variant,intron_variant                                                  |
| rs1046050593 | genic_upstream_transcript_variant,intron_variant                                                  |
| rs1046058900 | genic_upstream_transcript_variant,intron_variant                                                  |
| rs1046082065 | genic_downstream_transcript_variant,intron_variant                                                |
| rs1046089920 | genic_downstream_transcript_variant,intron_variant                                                |
| rs1046170388 | intron_variant                                                                                    |
| rs1046213948 | genic_upstream_transcript_variant,intron_variant                                                  |
| rs1046214518 | genic_downstream_transcript_variant,intron_variant                                                |
| rs1046230978 | intron_variant                                                                                    |
| rs1046264946 | intron_variant                                                                                    |
| rs1046301026 | intron_variant                                                                                    |
| rs1046334826 | genic_downstream_transcript_variant,intron_variant                                                |
| rs1046356799 | genic_downstream_transcript_variant,non_coding_transcript_variant,3_prime_UTR_variant             |
| rs1046377635 | intron_variant                                                                                    |
| rs1046379351 | intron_variant                                                                                    |
| rs1046407556 | genic_upstream_transcript_variant,intron_variant                                                  |
| rs1046415765 | genic_upstream_transcript_variant,intron_variant                                                  |
| rs1046422663 | intron_variant                                                                                    |
| rs1046435889 | intron_variant                                                                                    |
| rs1046442829 | genic_downstream_transcript_variant,intron_variant                                                |
| rs1046457433 | intron_variant                                                                                    |
| rs1046477775 | intron_variant                                                                                    |
| rs1046486968 | intron_variant                                                                                    |
| rs1046503177 | genic_upstream_transcript_variant,intron_variant                                                  |
| rs1046533701 | intron_variant                                                                                    |
| rs1046546917 | genic_upstream_transcript_variant,intron_variant                                                  |

|              |                                                                                       |
|--------------|---------------------------------------------------------------------------------------|
| rs1046556653 | genic_downstream_transcript_variant,intron_variant                                    |
| rs1046595846 | intron_variant                                                                        |
| rs1046629975 | genic_downstream_transcript_variant,downstream_transcript_variant,intron_variant      |
| rs1046732561 | genic_upstream_transcript_variant,intron_variant                                      |
| rs1046770380 | genic_upstream_transcript_variant,intron_variant                                      |
| rs1046784372 | intron_variant                                                                        |
| rs1046785066 | genic_downstream_transcript_variant,intron_variant                                    |
| rs1046792710 | genic_upstream_transcript_variant,intron_variant                                      |
| rs1046843203 | intron_variant                                                                        |
| rs1046869285 | genic_downstream_transcript_variant,non_coding_transcript_variant,3_prime_UTR_variant |
| rs1046884772 | genic_downstream_transcript_variant,intron_variant                                    |
| rs1046912313 | genic_upstream_transcript_variant,intron_variant                                      |
| rs1046922089 | intron_variant                                                                        |
| rs1046976549 | intron_variant                                                                        |
| rs1046990957 | genic_downstream_transcript_variant,intron_variant                                    |
| rs1047015800 | intron_variant                                                                        |
| rs1047021156 | genic_downstream_transcript_variant,intron_variant                                    |
| rs1047052531 | genic_downstream_transcript_variant,intron_variant                                    |
| rs1047062186 | genic_upstream_transcript_variant,intron_variant                                      |
| rs1047067876 | intron_variant                                                                        |
| rs1047076947 | genic_downstream_transcript_variant,intron_variant                                    |
| rs1047105967 | genic_upstream_transcript_variant,intron_variant                                      |
| rs1047136628 | genic_upstream_transcript_variant,intron_variant                                      |
| rs1047230756 | intron_variant                                                                        |
| rs1047233791 | genic_upstream_transcript_variant,intron_variant                                      |
| rs1047239673 | intron_variant                                                                        |
| rs1047264194 | genic_upstream_transcript_variant,intron_variant                                      |
| rs1047270424 | intron_variant                                                                        |
| rs1047273629 | genic_upstream_transcript_variant,intron_variant                                      |
| rs1047348367 | genic_upstream_transcript_variant,intron_variant                                      |
| rs1047374745 | genic_downstream_transcript_variant,intron_variant                                    |
| rs1047405334 | intron_variant                                                                        |
| rs1047413498 | intron_variant                                                                        |
| rs1047420659 | genic_upstream_transcript_variant,intron_variant                                      |
| rs1047437236 | intron_variant                                                                        |
| rs1047442060 | genic_upstream_transcript_variant,intron_variant                                      |
| rs1047448835 | genic_downstream_transcript_variant,intron_variant                                    |
| rs1047474188 | genic_upstream_transcript_variant,intron_variant                                      |
| rs1047485150 | intron_variant                                                                        |
| rs1047532844 | genic_upstream_transcript_variant,intron_variant                                      |
| rs1047573355 | genic_upstream_transcript_variant,intron_variant                                      |
| rs1047573757 | intron_variant                                                                        |
| rs1047583590 | genic_downstream_transcript_variant,intron_variant                                    |
| rs1047605159 | intron_variant                                                                        |
| rs1047610625 | genic_upstream_transcript_variant,intron_variant                                      |
| rs1047639092 | intron_variant                                                                        |
| rs1047678961 | genic_upstream_transcript_variant,intron_variant                                      |
| rs1047701962 | genic_upstream_transcript_variant,intron_variant                                      |
| rs1047760118 | intron_variant                                                                        |
| rs1047795499 | intron_variant                                                                        |
| rs1047843178 | genic_upstream_transcript_variant,intron_variant                                      |
| rs1047866755 | genic_upstream_transcript_variant,intron_variant                                      |
| rs1047868970 | genic_downstream_transcript_variant,intron_variant                                    |
| rs1047881239 | genic_downstream_transcript_variant,intron_variant                                    |
| rs1047887902 | intron_variant                                                                        |
| rs1047910117 | genic_downstream_transcript_variant,intron_variant                                    |
| rs1047934070 | genic_downstream_transcript_variant,intron_variant                                    |
| rs1047949848 | intron_variant                                                                        |
| rs1047967416 | genic_upstream_transcript_variant,intron_variant                                      |
| rs1047990709 | genic_upstream_transcript_variant,intron_variant                                      |
| rs1047996544 | genic_downstream_transcript_variant,non_coding_transcript_variant,3_prime_UTR_variant |
| rs1048024020 | genic_upstream_transcript_variant,intron_variant                                      |
| rs1048065386 | intron_variant                                                                        |
| rs1048078133 | intron_variant                                                                        |
| rs1048127071 | intron_variant                                                                        |
| rs1048137433 | intron_variant                                                                        |
| rs1048223830 | genic_upstream_transcript_variant,intron_variant                                      |
| rs1048228391 | genic_downstream_transcript_variant,intron_variant                                    |
| rs1048230704 | intron_variant                                                                        |
| rs1048234173 | genic_upstream_transcript_variant,intron_variant                                      |
| rs1048281308 | intron_variant,genic_downstream_transcript_variant                                    |
| rs1048289634 | intron_variant                                                                        |
| rs1048328305 | intron_variant,genic_upstream_transcript_variant                                      |
| rs1048345289 | intron_variant,genic_upstream_transcript_variant                                      |

|              |                                                                                                   |
|--------------|---------------------------------------------------------------------------------------------------|
| rs1048357161 | intron_variant                                                                                    |
| rs1048370601 | intron_variant                                                                                    |
| rs1048375922 | intron_variant,genic_upstream_transcript_variant                                                  |
| rs1048415804 | intron_variant                                                                                    |
| rs1048429175 | intron_variant,genic_upstream_transcript_variant                                                  |
| rs1048445609 | intron_variant,genic_downstream_transcript_variant                                                |
| rs1048455667 | intron_variant                                                                                    |
| rs1048484266 | intron_variant,genic_upstream_transcript_variant                                                  |
| rs1048517150 | intron_variant,genic_downstream_transcript_variant                                                |
| rs1048552423 | intron_variant                                                                                    |
| rs1048556984 | upstream_transcript_variant,intron_variant,genic_upstream_transcript_variant,2KB_upstream_variant |
| rs1048567921 | intron_variant,genic_downstream_transcript_variant                                                |
| rs1048601295 | intron_variant,genic_downstream_transcript_variant                                                |
| rs1048620823 | intron_variant,genic_upstream_transcript_variant                                                  |
| rs1048627583 | intron_variant,genic_upstream_transcript_variant                                                  |
| rs1048636319 | intron_variant                                                                                    |
| rs1048698840 | intron_variant                                                                                    |
| rs1048723230 | intron_variant,genic_upstream_transcript_variant                                                  |
| rs1048739580 | intron_variant,genic_downstream_transcript_variant                                                |
| rs1048756393 | upstream_transcript_variant,intron_variant,genic_upstream_transcript_variant,2KB_upstream_variant |
| rs1048764438 | intron_variant                                                                                    |
| rs1048796964 | intron_variant                                                                                    |
| rs1048810074 | intron_variant,genic_downstream_transcript_variant                                                |
| rs1048814462 | intron_variant                                                                                    |
| rs1048851644 | intron_variant,genic_downstream_transcript_variant                                                |
| rs1048874220 | intron_variant,genic_downstream_transcript_variant                                                |
| rs1048885544 | intron_variant,genic_upstream_transcript_variant                                                  |
| rs1048905890 | intron_variant,genic_downstream_transcript_variant                                                |
| rs1048916632 | intron_variant                                                                                    |
| rs1048957308 | intron_variant,genic_upstream_transcript_variant                                                  |
| rs1048959391 | intron_variant,genic_upstream_transcript_variant                                                  |
| rs1048963907 | intron_variant                                                                                    |
| rs1048972052 | intron_variant                                                                                    |
| rs1049045633 | intron_variant                                                                                    |
| rs1049070333 | intron_variant                                                                                    |
| rs1049073147 | upstream_transcript_variant,intron_variant,genic_upstream_transcript_variant,2KB_upstream_variant |
| rs1049079343 | upstream_transcript_variant,intron_variant,genic_upstream_transcript_variant,2KB_upstream_variant |
| rs1049118224 | intron_variant                                                                                    |
| rs1049149315 | intron_variant                                                                                    |
| rs1049175151 | intron_variant,genic_upstream_transcript_variant                                                  |
| rs1049273278 | intron_variant,genic_upstream_transcript_variant                                                  |
| rs1049322936 | intron_variant,genic_upstream_transcript_variant                                                  |
| rs1049351189 | intron_variant                                                                                    |
| rs1049403365 | intron_variant                                                                                    |
| rs1049423608 | intron_variant,genic_downstream_transcript_variant                                                |
| rs1049434320 | upstream_transcript_variant,intron_variant,genic_upstream_transcript_variant,2KB_upstream_variant |
| rs1049479719 | intron_variant,genic_upstream_transcript_variant                                                  |
| rs1049506782 | upstream_transcript_variant,intron_variant,genic_upstream_transcript_variant,2KB_upstream_variant |
| rs1049588083 | intron_variant                                                                                    |
| rs1049611678 | intron_variant,genic_upstream_transcript_variant                                                  |
| rs1049615580 | intron_variant,genic_downstream_transcript_variant                                                |
| rs1049669148 | intron_variant,genic_upstream_transcript_variant                                                  |
| rs1049690470 | intron_variant                                                                                    |
| rs1049698292 | intron_variant,genic_downstream_transcript_variant                                                |
| rs1049715691 | upstream_transcript_variant,intron_variant,genic_upstream_transcript_variant,2KB_upstream_variant |
| rs1049723970 | intron_variant                                                                                    |
| rs1049735599 | intron_variant,genic_upstream_transcript_variant                                                  |
| rs1049740748 | intron_variant                                                                                    |
| rs1049754538 | intron_variant                                                                                    |
| rs1049786435 | intron_variant,genic_upstream_transcript_variant                                                  |
| rs1049838936 | intron_variant,genic_upstream_transcript_variant                                                  |
| rs1049847675 | intron_variant,genic_upstream_transcript_variant                                                  |
| rs1049862443 | intron_variant,genic_downstream_transcript_variant                                                |
| rs1049865012 | intron_variant,genic_downstream_transcript_variant                                                |
| rs1049916748 | intron_variant                                                                                    |
| rs1049987046 | intron_variant,genic_upstream_transcript_variant                                                  |
| rs1050002265 | intron_variant,genic_upstream_transcript_variant                                                  |
| rs1050005124 | intron_variant,genic_upstream_transcript_variant                                                  |
| rs1050030554 | intron_variant,genic_downstream_transcript_variant                                                |
| rs1050084807 | intron_variant                                                                                    |
| rs1050132994 | upstream_transcript_variant,intron_variant,genic_upstream_transcript_variant,2KB_upstream_variant |
| rs1050142433 | intron_variant                                                                                    |
| rs1050172567 | intron_variant,genic_upstream_transcript_variant                                                  |
| rs1050178210 | intron_variant                                                                                    |

|              |                                                                                                   |
|--------------|---------------------------------------------------------------------------------------------------|
| rs1050190073 | intron_variant,genic_downstream_transcript_variant                                                |
| rs1050197733 | intron_variant,genic_downstream_transcript_variant                                                |
| rs1050218370 | intron_variant,genic_upstream_transcript_variant                                                  |
| rs1050224844 | intron_variant,genic_upstream_transcript_variant                                                  |
| rs1050248741 | intron_variant,genic_upstream_transcript_variant                                                  |
| rs1050274370 | intron_variant,genic_upstream_transcript_variant                                                  |
| rs1050299214 | intron_variant                                                                                    |
| rs1050334732 | intron_variant,genic_downstream_transcript_variant                                                |
| rs1050351221 | intron_variant                                                                                    |
| rs1050396275 | intron_variant,genic_upstream_transcript_variant                                                  |
| rs1050436532 | intron_variant                                                                                    |
| rs1050438286 | intron_variant                                                                                    |
| rs1050474893 | intron_variant,genic_upstream_transcript_variant                                                  |
| rs1050476709 | upstream_transcript_variant,intron_variant,genic_upstream_transcript_variant,2KB_upstream_variant |
| rs1050516424 | non_coding_transcript_variant,genic_downstream_transcript_variant,3_prime_UTR_variant             |
| rs1050550558 | intron_variant,genic_upstream_transcript_variant                                                  |
| rs1050567203 | intron_variant,genic_downstream_transcript_variant                                                |
| rs1050585218 | intron_variant,genic_upstream_transcript_variant                                                  |
| rs1050604164 | intron_variant,genic_upstream_transcript_variant                                                  |
| rs1050668693 | intron_variant,genic_downstream_transcript_variant                                                |
| rs1050678120 | intron_variant                                                                                    |
| rs1050680071 | intron_variant                                                                                    |
| rs1050696282 | intron_variant,genic_upstream_transcript_variant                                                  |
| rs1050733636 | intron_variant                                                                                    |
| rs1050750751 | intron_variant,genic_upstream_transcript_variant                                                  |
| rs1050772007 | intron_variant,genic_upstream_transcript_variant                                                  |
| rs1050781383 | intron_variant                                                                                    |
| rs1050804515 | intron_variant                                                                                    |
| rs1050805255 | intron_variant,genic_downstream_transcript_variant                                                |
| rs1050822862 | intron_variant,genic_upstream_transcript_variant                                                  |
| rs1050898988 | intron_variant,genic_downstream_transcript_variant                                                |
| rs1050908063 | intron_variant                                                                                    |
| rs1050914392 | intron_variant,genic_upstream_transcript_variant                                                  |
| rs1050917546 | intron_variant                                                                                    |
| rs1050935677 | intron_variant,genic_upstream_transcript_variant                                                  |
| rs1050949595 | intron_variant                                                                                    |
| rs1050966360 | intron_variant                                                                                    |
| rs1050988473 | intron_variant,genic_upstream_transcript_variant                                                  |
| rs1050999999 | intron_variant,genic_downstream_transcript_variant                                                |
| rs1051037610 | intron_variant,genic_upstream_transcript_variant                                                  |
| rs1051055293 | intron_variant                                                                                    |
| rs1051066910 | non_coding_transcript_variant,genic_downstream_transcript_variant,3_prime_UTR_variant             |
| rs1051075183 | intron_variant                                                                                    |
| rs1051118510 | intron_variant                                                                                    |
| rs1051127966 | intron_variant                                                                                    |
| rs1051129105 | intron_variant                                                                                    |
| rs1051167963 | intron_variant,genic_upstream_transcript_variant                                                  |
| rs1051186173 | intron_variant,genic_upstream_transcript_variant                                                  |
| rs1051199410 | upstream_transcript_variant,intron_variant,genic_upstream_transcript_variant,2KB_upstream_variant |
| rs1051203584 | intron_variant,genic_upstream_transcript_variant                                                  |
| rs1051239214 | intron_variant,genic_upstream_transcript_variant                                                  |
| rs1051323364 | intron_variant,genic_downstream_transcript_variant                                                |
| rs1051336410 | intron_variant,genic_downstream_transcript_variant                                                |
| rs1051363064 | intron_variant                                                                                    |
| rs1051409211 | intron_variant                                                                                    |
| rs1051429032 | intron_variant,genic_upstream_transcript_variant                                                  |
| rs1051460780 | intron_variant                                                                                    |
| rs1051484424 | intron_variant,genic_upstream_transcript_variant                                                  |
| rs1051529416 | intron_variant,genic_upstream_transcript_variant                                                  |
| rs1051545066 | intron_variant,genic_downstream_transcript_variant                                                |
| rs1051576079 | intron_variant,genic_upstream_transcript_variant                                                  |
| rs1051604454 | intron_variant,genic_upstream_transcript_variant                                                  |
| rs1051646130 | intron_variant                                                                                    |
| rs1051665582 | non_coding_transcript_variant,genic_downstream_transcript_variant,3_prime_UTR_variant             |
| rs1051674774 | intron_variant                                                                                    |
| rs1051684442 | intron_variant                                                                                    |
| rs1051693864 | intron_variant,genic_upstream_transcript_variant                                                  |
| rs1051701590 | intron_variant                                                                                    |
| rs1051722054 | intron_variant,genic_upstream_transcript_variant                                                  |
| rs1051726763 | intron_variant                                                                                    |
| rs1051746273 | intron_variant                                                                                    |
| rs1051753885 | intron_variant,genic_upstream_transcript_variant                                                  |
| rs1051761067 | upstream_transcript_variant,intron_variant,genic_upstream_transcript_variant,2KB_upstream_variant |
| rs1051836897 | intron_variant                                                                                    |

|              |                                                                                                   |
|--------------|---------------------------------------------------------------------------------------------------|
| rs1051843897 | intron_variant,genic_upstream_transcript_variant,upstream_transcript_variant                      |
| rs1051901766 | intron_variant,genic_upstream_transcript_variant                                                  |
| rs1051906055 | intron_variant,genic_upstream_transcript_variant                                                  |
| rs1051910873 | intron_variant                                                                                    |
| rs1051937694 | downstream_transcript_variant,500B_downstream_variant                                             |
| rs1051947815 | intron_variant,genic_downstream_transcript_variant                                                |
| rs1051964666 | intron_variant,genic_upstream_transcript_variant                                                  |
| rs1051967877 | intron_variant                                                                                    |
| rs1052009692 | intron_variant,genic_upstream_transcript_variant                                                  |
| rs1052025658 | intron_variant,genic_upstream_transcript_variant                                                  |
| rs1052066154 | intron_variant                                                                                    |
| rs1052089014 | intron_variant                                                                                    |
| rs1052120618 | intron_variant,genic_downstream_transcript_variant                                                |
| rs1052125114 | intron_variant,genic_downstream_transcript_variant                                                |
| rs1052134793 | intron_variant,genic_upstream_transcript_variant                                                  |
| rs1052161955 | intron_variant                                                                                    |
| rs1052171459 | intron_variant,genic_downstream_transcript_variant                                                |
| rs1052182877 | intron_variant,genic_downstream_transcript_variant                                                |
| rs1052214303 | intron_variant,genic_upstream_transcript_variant                                                  |
| rs1052259775 | intron_variant,genic_upstream_transcript_variant                                                  |
| rs1052301130 | intron_variant,genic_upstream_transcript_variant                                                  |
| rs1052339679 | missense_variant,intron_variant,coding_sequence_variant                                           |
| rs1052344186 | intron_variant                                                                                    |
| rs1052354725 | intron_variant,genic_upstream_transcript_variant                                                  |
| rs1052449918 | intron_variant,genic_downstream_transcript_variant                                                |
| rs1052469429 | intron_variant                                                                                    |
| rs1052482860 | intron_variant,genic_downstream_transcript_variant                                                |
| rs1052538729 | intron_variant                                                                                    |
| rs1052542229 | intron_variant,genic_upstream_transcript_variant                                                  |
| rs1052559367 | intron_variant,genic_upstream_transcript_variant                                                  |
| rs1052588101 | intron_variant                                                                                    |
| rs1052618052 | upstream_transcript_variant,intron_variant,genic_upstream_transcript_variant,2KB_upstream_variant |
| rs1052628449 | intron_variant,genic_upstream_transcript_variant                                                  |
| rs1052652560 | intron_variant,genic_downstream_transcript_variant                                                |
| rs1052679732 | intron_variant                                                                                    |
| rs1052753393 | intron_variant,genic_upstream_transcript_variant                                                  |
| rs1052775364 | intron_variant,genic_downstream_transcript_variant                                                |
| rs1052865716 | intron_variant                                                                                    |
| rs1052873444 | intron_variant                                                                                    |
| rs1052918561 | intron_variant                                                                                    |
| rs1052922424 | intron_variant                                                                                    |
| rs1052954313 | intron_variant,genic_downstream_transcript_variant                                                |
| rs1052964457 | intron_variant                                                                                    |
| rs1052993344 | intron_variant,genic_downstream_transcript_variant                                                |
| rs1052998107 | intron_variant,genic_upstream_transcript_variant                                                  |
| rs1053032890 | intron_variant                                                                                    |
| rs1053033948 | intron_variant,genic_upstream_transcript_variant                                                  |
| rs1053041007 | intron_variant,genic_downstream_transcript_variant                                                |
| rs1053079909 | intron_variant,genic_upstream_transcript_variant                                                  |
| rs1053085626 | intron_variant                                                                                    |
| rs1053136956 | intron_variant,genic_upstream_transcript_variant                                                  |
| rs1053205284 | intron_variant                                                                                    |
| rs1053222304 | intron_variant                                                                                    |
| rs1053227376 | intron_variant                                                                                    |
| rs1053244860 | intron_variant                                                                                    |
| rs1053257260 | intron_variant                                                                                    |
| rs1053330555 | intron_variant,genic_upstream_transcript_variant                                                  |
| rs1053339183 | intron_variant,genic_downstream_transcript_variant                                                |
| rs1053344678 | downstream_transcript_variant,500B_downstream_variant                                             |
| rs1053372287 | intron_variant,genic_downstream_transcript_variant                                                |
| rs1053383145 | intron_variant                                                                                    |
| rs1053384463 | intron_variant,genic_upstream_transcript_variant                                                  |
| rs1053416348 | intron_variant                                                                                    |
| rs1053492753 | intron_variant,genic_upstream_transcript_variant                                                  |
| rs1053539137 | intron_variant                                                                                    |
| rs1053547626 | intron_variant                                                                                    |
| rs1053553454 | intron_variant,genic_upstream_transcript_variant                                                  |
| rs1053558058 | intron_variant                                                                                    |
| rs1053594594 | intron_variant                                                                                    |
| rs1053614129 | upstream_transcript_variant,intron_variant,genic_upstream_transcript_variant,2KB_upstream_variant |
| rs1053677874 | intron_variant,genic_upstream_transcript_variant                                                  |
| rs1053709928 | intron_variant,genic_downstream_transcript_variant                                                |
| rs1053717328 | intron_variant,genic_downstream_transcript_variant                                                |
| rs1053744046 | intron_variant                                                                                    |

|              |                                                                                                   |
|--------------|---------------------------------------------------------------------------------------------------|
| rs1053795641 | intron_variant                                                                                    |
| rs1053819647 | intron_variant,genic_upstream_transcript_variant                                                  |
| rs1053825912 | intron_variant                                                                                    |
| rs1053834502 | intron_variant,genic_upstream_transcript_variant                                                  |
| rs1053874864 | intron_variant,genic_upstream_transcript_variant                                                  |
| rs1053890103 | intron_variant                                                                                    |
| rs1053993399 | intron_variant,genic_upstream_transcript_variant                                                  |
| rs1054021893 | intron_variant,genic_upstream_transcript_variant                                                  |
| rs1054053289 | intron_variant                                                                                    |
| rs1054056652 | intron_variant                                                                                    |
| rs1054064442 | intron_variant,genic_downstream_transcript_variant                                                |
| rs1054086318 | intron_variant                                                                                    |
| rs1054107323 | upstream_transcript_variant,intron_variant,genic_upstream_transcript_variant,2KB_upstream_variant |
| rs1054136485 | intron_variant,genic_upstream_transcript_variant                                                  |
| rs1054182885 | intron_variant,genic_upstream_transcript_variant                                                  |
| rs1054184097 | intron_variant,genic_upstream_transcript_variant                                                  |
| rs1054186353 | upstream_transcript_variant,intron_variant,genic_upstream_transcript_variant,2KB_upstream_variant |
| rs1054187045 | intron_variant                                                                                    |
| rs1054228455 | upstream_transcript_variant,intron_variant,genic_upstream_transcript_variant,2KB_upstream_variant |
| rs1054255212 | intron_variant                                                                                    |
| rs1054261308 | upstream_transcript_variant,intron_variant,genic_upstream_transcript_variant,2KB_upstream_variant |
| rs1054289040 | intron_variant                                                                                    |
| rs1054338312 | intron_variant,genic_upstream_transcript_variant                                                  |
| rs1054359147 | intron_variant                                                                                    |
| rs1054409722 | intron_variant,genic_upstream_transcript_variant                                                  |
| rs1054418241 | intron_variant,genic_upstream_transcript_variant                                                  |
| rs1054420847 | intron_variant,genic_upstream_transcript_variant                                                  |
| rs1054420982 | intron_variant,genic_upstream_transcript_variant                                                  |
| rs1054461545 | intron_variant,genic_downstream_transcript_variant                                                |
| rs1054467358 | intron_variant                                                                                    |
| rs1054484503 | intron_variant,genic_downstream_transcript_variant                                                |
| rs1054488209 | intron_variant                                                                                    |
| rs1054536581 | intron_variant                                                                                    |
| rs1054551997 | intron_variant                                                                                    |
| rs1054556630 | intron_variant,genic_upstream_transcript_variant                                                  |
| rs1054573748 | intron_variant                                                                                    |
| rs1054590164 | intron_variant                                                                                    |
| rs1054603843 | intron_variant                                                                                    |
| rs1054609836 | intron_variant                                                                                    |
| rs1054617374 | intron_variant,genic_upstream_transcript_variant                                                  |
| rs1054646057 | upstream_transcript_variant,intron_variant,genic_upstream_transcript_variant,2KB_upstream_variant |
| rs1054674159 | intron_variant,genic_downstream_transcript_variant                                                |
| rs1054694333 | intron_variant,genic_downstream_transcript_variant                                                |
| rs1054712577 | intron_variant                                                                                    |
| rs1054713562 | intron_variant,genic_upstream_transcript_variant                                                  |
| rs1054749449 | intron_variant                                                                                    |
| rs1054779569 | intron_variant,genic_upstream_transcript_variant                                                  |
| rs1054784283 | intron_variant,genic_upstream_transcript_variant                                                  |
| rs1054792843 | intron_variant,genic_upstream_transcript_variant                                                  |
| rs1054809891 | intron_variant,genic_downstream_transcript_variant                                                |
| rs1054834161 | intron_variant,genic_upstream_transcript_variant                                                  |
| rs1054893049 | intron_variant                                                                                    |
| rs1054917969 | intron_variant                                                                                    |
| rs1054944377 | intron_variant                                                                                    |
| rs1054946730 | intron_variant,genic_downstream_transcript_variant                                                |
| rs1054966427 | intron_variant,genic_downstream_transcript_variant                                                |
| rs1054976834 | intron_variant,genic_downstream_transcript_variant                                                |
| rs1054983801 | intron_variant,genic_upstream_transcript_variant                                                  |
| rs1055004292 | intron_variant,genic_upstream_transcript_variant                                                  |
| rs1055068754 | intron_variant,genic_downstream_transcript_variant                                                |
| rs1055113478 | intron_variant,genic_downstream_transcript_variant                                                |
| rs1055118876 | intron_variant                                                                                    |
| rs1055133588 | intron_variant,genic_upstream_transcript_variant                                                  |
| rs1055136932 | intron_variant                                                                                    |
| rs1055162438 | intron_variant,genic_upstream_transcript_variant                                                  |
| rs1055172794 | intron_variant                                                                                    |
| rs1055195554 | intron_variant                                                                                    |
| rs1055220159 | intron_variant,genic_upstream_transcript_variant                                                  |
| rs1055238997 | intron_variant                                                                                    |
| rs1055307219 | intron_variant,genic_upstream_transcript_variant                                                  |
| rs1055329382 | intron_variant,genic_upstream_transcript_variant                                                  |
| rs1055362374 | intron_variant                                                                                    |
| rs1055398159 | intron_variant,genic_downstream_transcript_variant                                                |
| rs1055398641 | intron_variant,genic_upstream_transcript_variant                                                  |

|              |                                                                                                   |
|--------------|---------------------------------------------------------------------------------------------------|
| rs1055404992 | intron_variant                                                                                    |
| rs1055451166 | intron_variant,genic_downstream_transcript_variant                                                |
| rs1055480538 | intron_variant,genic_upstream_transcript_variant                                                  |
| rs1055498170 | non_coding_transcript_variant,genic_downstream_transcript_variant,3_prime_UTR_variant             |
| rs1055505715 | intron_variant,genic_upstream_transcript_variant                                                  |
| rs1055549155 | intron_variant,genic_upstream_transcript_variant                                                  |
| rs1055562088 | intron_variant                                                                                    |
| rs1055591245 | intron_variant                                                                                    |
| rs1055662378 | intron_variant                                                                                    |
| rs1055662873 | intron_variant,genic_upstream_transcript_variant                                                  |
| rs1055682499 | intron_variant                                                                                    |
| rs1055690952 | intron_variant,genic_upstream_transcript_variant                                                  |
| rs1055698527 | intron_variant                                                                                    |
| rs1055736429 | non_coding_transcript_variant,genic_downstream_transcript_variant,3_prime_UTR_variant             |
| rs1055804865 | intron_variant                                                                                    |
| rs1055815048 | intron_variant,genic_downstream_transcript_variant                                                |
| rs1055815225 | intron_variant,genic_downstream_transcript_variant                                                |
| rs1055825686 | intron_variant                                                                                    |
| rs1055866056 | intron_variant,genic_downstream_transcript_variant                                                |
| rs1055892368 | intron_variant,genic_upstream_transcript_variant                                                  |
| rs1055923200 | intron_variant                                                                                    |
| rs1055967819 | intron_variant,genic_downstream_transcript_variant                                                |
| rs1055989862 | intron_variant,genic_upstream_transcript_variant                                                  |
| rs1055990878 | intron_variant                                                                                    |
| rs1056021222 | upstream_transcript_variant,intron_variant,genic_upstream_transcript_variant,2KB_upstream_variant |
| rs1056023521 | upstream_transcript_variant,intron_variant,genic_upstream_transcript_variant,2KB_upstream_variant |
| rs1056027998 | intron_variant,genic_upstream_transcript_variant                                                  |
| rs1056033574 | intron_variant,genic_upstream_transcript_variant                                                  |
| rs1056087456 | intron_variant,genic_upstream_transcript_variant                                                  |
| rs1056099425 | upstream_transcript_variant,intron_variant,genic_upstream_transcript_variant,2KB_upstream_variant |
| rs1056131781 | intron_variant,genic_upstream_transcript_variant                                                  |
| rs1056134141 | intron_variant,genic_upstream_transcript_variant                                                  |
| rs1056135900 | intron_variant                                                                                    |
| rs1056154204 | intron_variant,genic_downstream_transcript_variant                                                |
| rs1056207802 | intron_variant                                                                                    |
| rs1056262733 | intron_variant                                                                                    |
| rs1056273991 | intron_variant                                                                                    |
| rs1056323289 | intron_variant,genic_upstream_transcript_variant                                                  |
| rs1056370439 | intron_variant,genic_upstream_transcript_variant                                                  |
| rs1056420173 | intron_variant,genic_upstream_transcript_variant                                                  |
| rs1056434556 | intron_variant,genic_upstream_transcript_variant                                                  |
| rs1056435196 | intron_variant,genic_upstream_transcript_variant                                                  |
| rs1056435276 | intron_variant,genic_upstream_transcript_variant                                                  |
| rs1056470566 | intron_variant                                                                                    |
| rs1056473248 | intron_variant,genic_downstream_transcript_variant                                                |
| rs1056495021 | intron_variant,genic_downstream_transcript_variant                                                |
| rs1056500661 | intron_variant,genic_upstream_transcript_variant                                                  |
| rs1056513304 | upstream_transcript_variant,intron_variant,genic_upstream_transcript_variant,2KB_upstream_variant |
| rs1056558517 | intron_variant                                                                                    |
| rs1056647701 | intron_variant,genic_upstream_transcript_variant                                                  |
| rs1056651403 | intron_variant,genic_downstream_transcript_variant                                                |
| rs1056667134 | intron_variant                                                                                    |
| rs1056680599 | intron_variant                                                                                    |
| rs1056691373 | intron_variant,genic_downstream_transcript_variant                                                |
| rs1056704977 | intron_variant,genic_upstream_transcript_variant                                                  |
| rs1056773744 | intron_variant,genic_upstream_transcript_variant                                                  |
| rs1056789824 | intron_variant                                                                                    |
| rs1056810652 | intron_variant                                                                                    |
| rs1056815382 | upstream_transcript_variant,intron_variant,genic_upstream_transcript_variant,2KB_upstream_variant |
| rs1056831602 | intron_variant,genic_downstream_transcript_variant                                                |
| rs1056832662 | intron_variant,genic_upstream_transcript_variant                                                  |
| rs1056858110 | intron_variant,genic_upstream_transcript_variant                                                  |
| rs1056866527 | intron_variant                                                                                    |
| rs1056880982 | upstream_transcript_variant,intron_variant,genic_upstream_transcript_variant,2KB_upstream_variant |
| rs1056891764 | intron_variant                                                                                    |
| rs1056924867 | intron_variant                                                                                    |
| rs1056954782 | intron_variant                                                                                    |
| rs1056968216 | intron_variant                                                                                    |
| rs1056986535 | intron_variant,genic_downstream_transcript_variant                                                |
| rs1057000500 | intron_variant                                                                                    |
| rs1057035787 | intron_variant,genic_upstream_transcript_variant                                                  |
| rs1057037700 | intron_variant,genic_upstream_transcript_variant                                                  |
| rs1057058159 | intron_variant,genic_upstream_transcript_variant                                                  |
| rs1057089790 | intron_variant,genic_upstream_transcript_variant,upstream_transcript_variant                      |

|              |                                                                                                                         |
|--------------|-------------------------------------------------------------------------------------------------------------------------|
| rs1057097764 | intron_variant,genic_upstream_transcript_variant                                                                        |
| rs1057109191 | intron_variant,genic_upstream_transcript_variant                                                                        |
| rs1057136692 | intron_variant,genic_upstream_transcript_variant                                                                        |
| rs1057155138 | intron_variant,genic_downstream_transcript_variant                                                                      |
| rs1057159493 | intron_variant,genic_upstream_transcript_variant                                                                        |
| rs1057161088 | intron_variant,genic_upstream_transcript_variant,upstream_transcript_variant                                            |
| rs1057189642 | intron_variant,genic_upstream_transcript_variant                                                                        |
| rs1057189829 | intron_variant,genic_upstream_transcript_variant                                                                        |
| rs1057202757 | intron_variant                                                                                                          |
| rs1057263101 | intron_variant                                                                                                          |
| rs1057304569 | intron_variant,genic_upstream_transcript_variant                                                                        |
| rs1057321793 | upstream_transcript_variant,intron_variant,genic_upstream_transcript_variant,2KB_upstream_variant                       |
| rs1057330863 | intron_variant,genic_downstream_transcript_variant                                                                      |
| rs1057332042 | intron_variant,genic_upstream_transcript_variant                                                                        |
| rs1057344286 | intron_variant,genic_upstream_transcript_variant                                                                        |
| rs1057402061 | intron_variant,genic_downstream_transcript_variant                                                                      |
| rs1057430424 | intron_variant,genic_upstream_transcript_variant                                                                        |
| rs1057454981 | intron_variant                                                                                                          |
| rs1057465803 | intron_variant                                                                                                          |
| rs1057482679 | intron_variant,genic_downstream_transcript_variant                                                                      |
| rs1057493280 | intron_variant,genic_upstream_transcript_variant                                                                        |
| rs1057497531 | intron_variant,genic_upstream_transcript_variant                                                                        |
| rs1156238219 | intron_variant,genic_downstream_transcript_variant                                                                      |
| rs1156263180 | intron_variant,genic_downstream_transcript_variant                                                                      |
| rs1156265004 | intron_variant,genic_upstream_transcript_variant                                                                        |
| rs1156270600 | intron_variant,genic_upstream_transcript_variant                                                                        |
| rs1156314582 | intron_variant,genic_downstream_transcript_variant                                                                      |
| rs1156316060 | intron_variant,genic_downstream_transcript_variant                                                                      |
| rs1156331544 | intron_variant,genic_downstream_transcript_variant                                                                      |
| rs1156368119 | intron_variant,genic_upstream_transcript_variant                                                                        |
| rs1156375618 | intron_variant                                                                                                          |
| rs1156430932 | intron_variant                                                                                                          |
| rs1156431640 | non_coding_transcript_variant,genic_downstream_transcript_variant,3_prime_UTR_variant                                   |
| rs1156447103 | intron_variant                                                                                                          |
| rs1156449068 | intron_variant,genic_upstream_transcript_variant                                                                        |
| rs1156472670 | intron_variant,genic_upstream_transcript_variant                                                                        |
| rs1156499984 | intron_variant,genic_upstream_transcript_variant                                                                        |
| rs1156532089 | intron_variant                                                                                                          |
| rs1156554766 | intron_variant,genic_upstream_transcript_variant                                                                        |
| rs1156562216 | intron_variant                                                                                                          |
| rs1156633663 | intron_variant,genic_upstream_transcript_variant                                                                        |
| rs1156722075 | intron_variant,genic_upstream_transcript_variant                                                                        |
| rs1156748589 | upstream_transcript_variant,intron_variant,genic_upstream_transcript_variant,2KB_upstream_variant                       |
| rs1156759729 | intron_variant,genic_upstream_transcript_variant                                                                        |
| rs1156786664 | intron_variant                                                                                                          |
| rs1156790048 | intron_variant,genic_downstream_transcript_variant                                                                      |
| rs1156795390 | intron_variant                                                                                                          |
| rs1156833196 | intron_variant,genic_upstream_transcript_variant                                                                        |
| rs1156839096 | intron_variant,genic_upstream_transcript_variant                                                                        |
| rs1156842060 | intron_variant,genic_downstream_transcript_variant                                                                      |
| rs1156860506 | intron_variant,genic_upstream_transcript_variant                                                                        |
| rs1156887354 | intron_variant                                                                                                          |
| rs1156914826 | intron_variant                                                                                                          |
| rs1156986130 | intron_variant                                                                                                          |
| rs1156988845 | intron_variant,genic_upstream_transcript_variant,upstream_transcript_variant                                            |
| rs1157046106 | intron_variant,genic_upstream_transcript_variant                                                                        |
| rs1157087250 | intron_variant,genic_upstream_transcript_variant                                                                        |
| rs1157087962 | intron_variant,genic_downstream_transcript_variant                                                                      |
| rs1157092020 | intron_variant                                                                                                          |
| rs1157114624 | intron_variant,genic_upstream_transcript_variant                                                                        |
| rs1157140040 | intron_variant,genic_upstream_transcript_variant                                                                        |
| rs1157157520 | intron_variant,genic_upstream_transcript_variant                                                                        |
| rs1157169853 | intron_variant,genic_upstream_transcript_variant                                                                        |
| rs1157251036 | missense_variant,non_coding_transcript_variant,intron_variant,genic_upstream_transcript_variant,coding_sequence_variant |
| rs1157252951 | intron_variant,genic_upstream_transcript_variant                                                                        |
| rs1157261740 | intron_variant                                                                                                          |
| rs1157270088 | intron_variant                                                                                                          |
| rs1157309729 | non_coding_transcript_variant,genic_downstream_transcript_variant,3_prime_UTR_variant                                   |
| rs1157318663 | intron_variant                                                                                                          |
| rs1157320844 | intron_variant,genic_downstream_transcript_variant                                                                      |
| rs1157330646 | intron_variant                                                                                                          |
| rs1157355622 | intron_variant,genic_upstream_transcript_variant                                                                        |
| rs1157386531 | intron_variant                                                                                                          |
| rs1157416855 | intron_variant                                                                                                          |

|              |                                                                                                            |
|--------------|------------------------------------------------------------------------------------------------------------|
| rs1157423377 | non_coding_transcript_variant,genic_downstream_transcript_variant,3_prime_UTR_variant                      |
| rs1157510767 | intron_variant,genic_upstream_transcript_variant,upstream_transcript_variant,5_prime_UTR_variant           |
| rs1157512892 | intron_variant                                                                                             |
| rs1157644794 | intron_variant                                                                                             |
| rs1157738518 | intron_variant                                                                                             |
| rs1157755668 | intron_variant,genic_upstream_transcript_variant                                                           |
| rs1157759789 | intron_variant                                                                                             |
| rs1157778365 | intron_variant                                                                                             |
| rs1157793713 | intron_variant,genic_upstream_transcript_variant,upstream_transcript_variant                               |
| rs1157809611 | intron_variant                                                                                             |
| rs1157813214 | intron_variant                                                                                             |
| rs1157841876 | intron_variant,genic_downstream_transcript_variant                                                         |
| rs1157872878 | intron_variant,genic_upstream_transcript_variant                                                           |
| rs1157884524 | intron_variant,genic_upstream_transcript_variant,upstream_transcript_variant                               |
| rs1157886665 | intron_variant,genic_downstream_transcript_variant                                                         |
| rs1157966283 | intron_variant                                                                                             |
| rs1157997355 | intron_variant,genic_downstream_transcript_variant                                                         |
| rs1158002068 | intron_variant,genic_downstream_transcript_variant                                                         |
| rs1158021252 | intron_variant,genic_downstream_transcript_variant                                                         |
| rs1158021755 | missense_variant,non_coding_transcript_variant,genic_downstream_transcript_variant,coding_sequence_variant |
| rs1158036966 | intron_variant,genic_upstream_transcript_variant                                                           |
| rs1158051781 | intron_variant,genic_downstream_transcript_variant                                                         |
| rs1158107700 | intron_variant,genic_upstream_transcript_variant                                                           |
| rs1158166362 | intron_variant,genic_upstream_transcript_variant                                                           |
| rs1158188435 | intron_variant,genic_upstream_transcript_variant,upstream_transcript_variant                               |
| rs1158201382 | intron_variant                                                                                             |
| rs1158240013 | intron_variant,genic_downstream_transcript_variant                                                         |
| rs1158248439 | upstream_transcript_variant,intron_variant,genic_upstream_transcript_variant,2KB_upstream_variant          |
| rs1158309588 | intron_variant,genic_downstream_transcript_variant                                                         |
| rs1158324706 | intron_variant,genic_upstream_transcript_variant                                                           |
| rs1158352400 | intron_variant,genic_upstream_transcript_variant                                                           |
| rs1158414429 | intron_variant,genic_upstream_transcript_variant                                                           |
| rs1158450342 | intron_variant,genic_downstream_transcript_variant                                                         |
| rs1158464756 | intron_variant,genic_downstream_transcript_variant                                                         |
| rs1158469759 | intron_variant                                                                                             |
| rs1158471126 | intron_variant,genic_upstream_transcript_variant                                                           |
| rs1158491142 | intron_variant,genic_upstream_transcript_variant                                                           |
| rs1158492040 | intron_variant,genic_upstream_transcript_variant                                                           |
| rs1158497354 | intron_variant,genic_upstream_transcript_variant                                                           |
| rs1158541592 | intron_variant,genic_upstream_transcript_variant                                                           |
| rs1158565250 | intron_variant                                                                                             |
| rs1158573005 | intron_variant,genic_downstream_transcript_variant                                                         |
| rs1158589650 | intron_variant                                                                                             |
| rs1158607204 | intron_variant,genic_upstream_transcript_variant                                                           |
| rs1158614455 | intron_variant,genic_upstream_transcript_variant                                                           |
| rs1158623789 | intron_variant,genic_downstream_transcript_variant                                                         |
| rs1158646059 | intron_variant                                                                                             |
| rs1158647241 | intron_variant,genic_downstream_transcript_variant                                                         |
| rs1158666409 | intron_variant,genic_upstream_transcript_variant                                                           |
| rs1158674673 | intron_variant,genic_downstream_transcript_variant                                                         |
| rs1158678854 | intron_variant                                                                                             |
| rs1158715302 | upstream_transcript_variant,intron_variant,genic_upstream_transcript_variant,2KB_upstream_variant          |
| rs1158735034 | missense_variant,non_coding_transcript_variant,genic_downstream_transcript_variant,coding_sequence_variant |
| rs1158740280 | intron_variant                                                                                             |
| rs1158744600 | intron_variant                                                                                             |
| rs1158751400 | intron_variant                                                                                             |
| rs1158763978 | intron_variant                                                                                             |
| rs1158766750 | intron_variant,genic_upstream_transcript_variant                                                           |
| rs1158767214 | intron_variant,genic_upstream_transcript_variant                                                           |
| rs1158837658 | intron_variant,genic_downstream_transcript_variant                                                         |
| rs1158842973 | intron_variant                                                                                             |
| rs1158855385 | intron_variant,genic_upstream_transcript_variant                                                           |
| rs1158877865 | intron_variant                                                                                             |
| rs1158929224 | intron_variant,genic_upstream_transcript_variant                                                           |
| rs1158929330 | intron_variant,genic_upstream_transcript_variant                                                           |
| rs1159023521 | intron_variant                                                                                             |
| rs1159200071 | intron_variant                                                                                             |
| rs1159264019 | intron_variant                                                                                             |
| rs1159298491 | genic_upstream_transcript_variant,intron_variant,5_prime_UTR_variant,non_coding_transcript_variant         |
| rs1159300101 | intron_variant,genic_downstream_transcript_variant                                                         |
| rs1159308129 | intron_variant,genic_upstream_transcript_variant                                                           |
| rs1159412295 | intron_variant,genic_upstream_transcript_variant                                                           |
| rs1159529716 | intron_variant,genic_upstream_transcript_variant                                                           |
| rs1159545087 | intron_variant,genic_upstream_transcript_variant,2KB_upstream_variant,upstream_transcript_variant          |

|              |                                                                                                   |
|--------------|---------------------------------------------------------------------------------------------------|
| rs1159554633 | synonymous_variant,non_coding_transcript_variant,coding_sequence_variant                          |
| rs1159565847 | intron_variant,genic_upstream_transcript_variant                                                  |
| rs1159570309 | intron_variant,genic_downstream_transcript_variant                                                |
| rs1159582836 | intron_variant                                                                                    |
| rs1159594769 | intron_variant,genic_upstream_transcript_variant,upstream_transcript_variant                      |
| rs1159613194 | intron_variant,genic_upstream_transcript_variant                                                  |
| rs1159614215 | intron_variant                                                                                    |
| rs1159657196 | intron_variant,genic_upstream_transcript_variant                                                  |
| rs1159662516 | intron_variant,genic_downstream_transcript_variant                                                |
| rs1159670216 | intron_variant                                                                                    |
| rs1159753967 | intron_variant,genic_upstream_transcript_variant                                                  |
| rs1159797317 | intron_variant,genic_upstream_transcript_variant                                                  |
| rs1159847811 | intron_variant,genic_downstream_transcript_variant                                                |
| rs1159875470 | intron_variant,genic_upstream_transcript_variant                                                  |
| rs1159879243 | intron_variant,genic_upstream_transcript_variant                                                  |
| rs1159946417 | intron_variant,genic_upstream_transcript_variant                                                  |
| rs1159957778 | intron_variant                                                                                    |
| rs1159997008 | intron_variant                                                                                    |
| rs1160014764 | intron_variant                                                                                    |
| rs1160047047 | synonymous_variant,non_coding_transcript_variant,coding_sequence_variant                          |
| rs1160061759 | intron_variant,genic_upstream_transcript_variant,2KB_upstream_variant,upstream_transcript_variant |
| rs1160065525 | intron_variant,genic_upstream_transcript_variant                                                  |
| rs1160080048 | intron_variant,genic_upstream_transcript_variant                                                  |
| rs1160090283 | intron_variant,genic_upstream_transcript_variant                                                  |
| rs1160137069 | intron_variant,genic_upstream_transcript_variant                                                  |
| rs1160143509 | intron_variant                                                                                    |
| rs1160155853 | intron_variant,genic_upstream_transcript_variant                                                  |
| rs1160214491 | intron_variant                                                                                    |
| rs1160286553 | intron_variant,genic_upstream_transcript_variant                                                  |
| rs1160307326 | intron_variant                                                                                    |
| rs1160344447 | intron_variant                                                                                    |
| rs1160367169 | intron_variant                                                                                    |
| rs1160371361 | intron_variant,genic_upstream_transcript_variant                                                  |
| rs1160391862 | intron_variant,genic_upstream_transcript_variant                                                  |
| rs1160393200 | intron_variant,genic_downstream_transcript_variant                                                |
| rs1160401756 | intron_variant,genic_downstream_transcript_variant                                                |
| rs1160439856 | intron_variant                                                                                    |
| rs1160455701 | intron_variant,genic_downstream_transcript_variant                                                |
| rs1160465483 | intron_variant                                                                                    |
| rs1160490211 | genic_upstream_transcript_variant,intron_variant,2KB_upstream_variant,upstream_transcript_variant |
| rs1160494141 | intron_variant                                                                                    |
| rs1160517226 | intron_variant                                                                                    |
| rs1160520306 | genic_upstream_transcript_variant,intron_variant,2KB_upstream_variant,upstream_transcript_variant |
| rs1160532363 | intron_variant                                                                                    |
| rs1160549795 | intron_variant                                                                                    |
| rs1160570568 | intron_variant,genic_upstream_transcript_variant                                                  |
| rs1160590573 | intron_variant,genic_downstream_transcript_variant                                                |
| rs1160640871 | intron_variant                                                                                    |
| rs1160652485 | intron_variant                                                                                    |
| rs1160708482 | intron_variant,genic_upstream_transcript_variant                                                  |
| rs1160803030 | genic_upstream_transcript_variant,intron_variant,2KB_upstream_variant,upstream_transcript_variant |
| rs1160816487 | intron_variant,genic_downstream_transcript_variant                                                |
| rs1160821810 | missense_variant,non_coding_transcript_variant,coding_sequence_variant                            |
| rs1160850346 | intron_variant                                                                                    |
| rs1160890305 | intron_variant                                                                                    |
| rs1160892136 | intron_variant                                                                                    |
| rs1160927623 | intron_variant,genic_upstream_transcript_variant                                                  |
| rs1160984039 | intron_variant,genic_upstream_transcript_variant                                                  |
| rs1160991896 | intron_variant                                                                                    |
| rs1161056019 | non_coding_transcript_variant,genic_downstream_transcript_variant,3_prime_UTR_variant             |
| rs1161062339 | intron_variant,genic_upstream_transcript_variant                                                  |
| rs1161081035 | intron_variant                                                                                    |
| rs1161112192 | intron_variant,genic_downstream_transcript_variant                                                |
| rs1161141504 | intron_variant,genic_upstream_transcript_variant                                                  |
| rs1161148949 | intron_variant,genic_upstream_transcript_variant                                                  |
| rs1161163868 | intron_variant,genic_upstream_transcript_variant                                                  |
| rs1161189760 | intron_variant                                                                                    |
| rs1161225498 | intron_variant,genic_upstream_transcript_variant                                                  |
| rs1161240429 | intron_variant,genic_upstream_transcript_variant,upstream_transcript_variant                      |
| rs1161252489 | intron_variant,genic_upstream_transcript_variant                                                  |
| rs1161255319 | intron_variant                                                                                    |
| rs1161269175 | intron_variant,genic_upstream_transcript_variant                                                  |
| rs1161281761 | intron_variant,genic_upstream_transcript_variant                                                  |
| rs1161302101 | non_coding_transcript_variant,genic_downstream_transcript_variant,3_prime_UTR_variant             |

|              |                                                                                                            |
|--------------|------------------------------------------------------------------------------------------------------------|
| rs1161341747 | intron_variant                                                                                             |
| rs1161425732 | genic_upstream_transcript_variant,intron_variant,upstream_transcript_variant,5_prime_UTR_variant           |
| rs1161435399 | intron_variant,genic_downstream_transcript_variant                                                         |
| rs1161437762 | intron_variant,genic_upstream_transcript_variant                                                           |
| rs1161474789 | intron_variant,genic_upstream_transcript_variant                                                           |
| rs1161522847 | intron_variant,genic_upstream_transcript_variant                                                           |
| rs1161539896 | intron_variant,genic_upstream_transcript_variant                                                           |
| rs1161549710 | intron_variant,genic_downstream_transcript_variant                                                         |
| rs1161590652 | intron_variant,genic_upstream_transcript_variant                                                           |
| rs1161620619 | intron_variant                                                                                             |
| rs1161649916 | intron_variant,genic_upstream_transcript_variant                                                           |
| rs1161677915 | intron_variant                                                                                             |
| rs1161702517 | intron_variant                                                                                             |
| rs1161703269 | non_coding_transcript_variant,genic_downstream_transcript_variant,3_prime_UTR_variant                      |
| rs1161704161 | intron_variant,genic_upstream_transcript_variant                                                           |
| rs1161726560 | intron_variant,genic_upstream_transcript_variant                                                           |
| rs1161745729 | intron_variant                                                                                             |
| rs1161774092 | intron_variant,genic_upstream_transcript_variant                                                           |
| rs1161780938 | intron_variant,genic_upstream_transcript_variant                                                           |
| rs1161781865 | intron_variant                                                                                             |
| rs1161805452 | intron_variant                                                                                             |
| rs1161815786 | intron_variant,genic_upstream_transcript_variant                                                           |
| rs1161860934 | intron_variant,genic_upstream_transcript_variant                                                           |
| rs1161887725 | intron_variant                                                                                             |
| rs1161946530 | intron_variant,genic_upstream_transcript_variant                                                           |
| rs1161957215 | intron_variant,genic_downstream_transcript_variant                                                         |
| rs1161961634 | intron_variant                                                                                             |
| rs1161975783 | intron_variant,genic_downstream_transcript_variant                                                         |
| rs1162012536 | intron_variant,genic_upstream_transcript_variant                                                           |
| rs1162014535 | intron_variant,genic_upstream_transcript_variant                                                           |
| rs1162057656 | intron_variant,genic_upstream_transcript_variant,2KB_upstream_variant,upstream_transcript_variant          |
| rs1162111244 | intron_variant,genic_upstream_transcript_variant                                                           |
| rs1162116332 | intron_variant                                                                                             |
| rs1162131277 | intron_variant,genic_downstream_transcript_variant                                                         |
| rs1162135733 | intron_variant,missense_variant,coding_sequence_variant                                                    |
| rs1162136618 | intron_variant,genic_upstream_transcript_variant                                                           |
| rs1162174940 | intron_variant,genic_downstream_transcript_variant                                                         |
| rs1162238827 | intron_variant,genic_upstream_transcript_variant                                                           |
| rs1162243103 | missense_variant,non_coding_transcript_variant,genic_downstream_transcript_variant,coding_sequence_variant |
| rs1162254003 | intron_variant,genic_upstream_transcript_variant                                                           |
| rs1162255898 | intron_variant                                                                                             |
| rs1162259085 | intron_variant,genic_upstream_transcript_variant                                                           |
| rs1162302732 | intron_variant,downstream_transcript_variant,genic_downstream_transcript_variant                           |
| rs1162325910 | intron_variant,genic_downstream_transcript_variant                                                         |
| rs1162329543 | intron_variant                                                                                             |
| rs1162399303 | intron_variant,genic_downstream_transcript_variant                                                         |
| rs1162426350 | intron_variant,genic_downstream_transcript_variant                                                         |
| rs1162438221 | intron_variant,genic_downstream_transcript_variant                                                         |
| rs1162449876 | intron_variant                                                                                             |
| rs1162452895 | intron_variant,genic_upstream_transcript_variant                                                           |
| rs1162453053 | intron_variant                                                                                             |
| rs1162527833 | intron_variant,genic_upstream_transcript_variant                                                           |
| rs1162551251 | intron_variant,genic_downstream_transcript_variant                                                         |
| rs1162551792 | intron_variant                                                                                             |
| rs1162562378 | intron_variant,genic_upstream_transcript_variant                                                           |
| rs1162570264 | intron_variant,genic_downstream_transcript_variant                                                         |
| rs1162656180 | intron_variant,genic_downstream_transcript_variant                                                         |
| rs1162659665 | intron_variant                                                                                             |
| rs1162667777 | intron_variant,genic_downstream_transcript_variant                                                         |
| rs1162691497 | intron_variant                                                                                             |
| rs1162737036 | intron_variant,genic_upstream_transcript_variant                                                           |
| rs1162751638 | intron_variant,genic_upstream_transcript_variant                                                           |
| rs1162774981 | synonymous_variant,non_coding_transcript_variant,coding_sequence_variant                                   |
| rs1162811410 | intron_variant                                                                                             |
| rs1162836630 | intron_variant                                                                                             |
| rs1162869994 | intron_variant                                                                                             |
| rs1162878755 | intron_variant,genic_upstream_transcript_variant                                                           |
| rs1162893477 | intron_variant                                                                                             |
| rs1162894470 | intron_variant                                                                                             |
| rs1162899176 | intron_variant,genic_upstream_transcript_variant                                                           |
| rs1162912353 | intron_variant,genic_upstream_transcript_variant                                                           |
| rs1162943809 | intron_variant,genic_upstream_transcript_variant                                                           |
| rs1162959071 | intron_variant                                                                                             |
| rs1162960924 | intron_variant                                                                                             |

|              |                                                                                                   |
|--------------|---------------------------------------------------------------------------------------------------|
| rs1162982170 | intron_variant,genic_downstream_transcript_variant                                                |
| rs1163002178 | intron_variant,genic_upstream_transcript_variant                                                  |
| rs1163016730 | intron_variant,genic_upstream_transcript_variant                                                  |
| rs1163026316 | intron_variant                                                                                    |
| rs1163073886 | intron_variant                                                                                    |
| rs1163121852 | intron_variant,genic_downstream_transcript_variant                                                |
| rs1163165818 | intron_variant                                                                                    |
| rs1163166935 | intron_variant                                                                                    |
| rs1163188018 | intron_variant                                                                                    |
| rs1163198028 | intron_variant,genic_upstream_transcript_variant                                                  |
| rs1163220097 | intron_variant,genic_upstream_transcript_variant                                                  |
| rs1163315198 | intron_variant,genic_downstream_transcript_variant                                                |
| rs1163321111 | intron_variant,genic_upstream_transcript_variant                                                  |
| rs1163328620 | intron_variant,genic_upstream_transcript_variant                                                  |
| rs1163350845 | intron_variant,genic_upstream_transcript_variant                                                  |
| rs1163374298 | intron_variant,genic_upstream_transcript_variant                                                  |
| rs1163389741 | intron_variant,genic_upstream_transcript_variant                                                  |
| rs1163395460 | intron_variant,genic_upstream_transcript_variant                                                  |
| rs1163426074 | intron_variant                                                                                    |
| rs1163518685 | intron_variant,5_prime_UTR_variant                                                                |
| rs1163519736 | intron_variant,genic_downstream_transcript_variant                                                |
| rs1163526478 | intron_variant,genic_upstream_transcript_variant                                                  |
| rs1163577342 | non_coding_transcript_variant,genic_downstream_transcript_variant,3_prime_UTR_variant             |
| rs1163592164 | intron_variant                                                                                    |
| rs1163641776 | intron_variant,genic_upstream_transcript_variant                                                  |
| rs1163731416 | intron_variant,genic_upstream_transcript_variant,upstream_transcript_variant                      |
| rs1163772828 | intron_variant,genic_upstream_transcript_variant                                                  |
| rs1163837953 | intron_variant,genic_downstream_transcript_variant                                                |
| rs1163883118 | intron_variant,genic_upstream_transcript_variant                                                  |
| rs1163884679 | genic_upstream_transcript_variant,intron_variant,2KB_upstream_variant,upstream_transcript_variant |
| rs1163888908 | intron_variant,genic_upstream_transcript_variant                                                  |
| rs1163891306 | intron_variant,genic_upstream_transcript_variant                                                  |
| rs1163953942 | intron_variant                                                                                    |
| rs1163954354 | intron_variant,genic_upstream_transcript_variant                                                  |
| rs1163959348 | intron_variant                                                                                    |
| rs1164031065 | intron_variant                                                                                    |
| rs1164040863 | intron_variant,genic_downstream_transcript_variant                                                |
| rs1164049554 | intron_variant,genic_upstream_transcript_variant                                                  |
| rs1164113330 | intron_variant,genic_downstream_transcript_variant                                                |
| rs1164118777 | intron_variant,genic_upstream_transcript_variant                                                  |
| rs1164207553 | intron_variant,genic_upstream_transcript_variant                                                  |
| rs1164220422 | intron_variant,genic_upstream_transcript_variant                                                  |
| rs1164236798 | intron_variant                                                                                    |
| rs1164275548 | intron_variant,genic_downstream_transcript_variant                                                |
| rs1164297438 | intron_variant                                                                                    |
| rs1164307753 | intron_variant,genic_upstream_transcript_variant                                                  |
| rs1164314982 | intron_variant,genic_upstream_transcript_variant                                                  |
| rs1164396339 | intron_variant,genic_upstream_transcript_variant                                                  |
| rs1164465610 | intron_variant                                                                                    |
| rs1164474296 | intron_variant,genic_upstream_transcript_variant                                                  |
| rs1164505924 | intron_variant,genic_upstream_transcript_variant                                                  |
| rs1164530077 | intron_variant,genic_downstream_transcript_variant                                                |
| rs1164546569 | missense_variant,non_coding_transcript_variant,coding_sequence_variant                            |
| rs1164564549 | intron_variant                                                                                    |
| rs1164587328 | intron_variant                                                                                    |
| rs1164616242 | intron_variant,genic_upstream_transcript_variant                                                  |
| rs1164657018 | intron_variant,genic_upstream_transcript_variant                                                  |
| rs1164657688 | intron_variant,genic_upstream_transcript_variant                                                  |
| rs1164662571 | intron_variant,genic_downstream_transcript_variant                                                |
| rs1164705504 | intron_variant                                                                                    |
| rs1164729147 | intron_variant                                                                                    |
| rs1164767094 | intron_variant,genic_upstream_transcript_variant                                                  |
| rs1164771938 | intron_variant,genic_upstream_transcript_variant                                                  |
| rs1164805994 | intron_variant                                                                                    |
| rs1164819895 | intron_variant,genic_downstream_transcript_variant                                                |
| rs1164863045 | intron_variant                                                                                    |
| rs1164890885 | non_coding_transcript_variant,genic_downstream_transcript_variant,3_prime_UTR_variant             |
| rs1164945772 | intron_variant                                                                                    |
| rs1164957767 | intron_variant,genic_upstream_transcript_variant                                                  |
| rs1164982538 | intron_variant,genic_upstream_transcript_variant                                                  |
| rs1164988105 | intron_variant,genic_downstream_transcript_variant                                                |
| rs1164990430 | genic_upstream_transcript_variant,intron_variant,2KB_upstream_variant,upstream_transcript_variant |
| rs1164997515 | intron_variant,genic_upstream_transcript_variant                                                  |
| rs1165005682 | intron_variant,genic_upstream_transcript_variant                                                  |

|              |                                                                                                                               |
|--------------|-------------------------------------------------------------------------------------------------------------------------------|
| rs1165063151 | intron_variant                                                                                                                |
| rs1165064390 | intron_variant                                                                                                                |
| rs1165113385 | intron_variant,genic_upstream_transcript_variant                                                                              |
| rs1165116650 | intron_variant                                                                                                                |
| rs1165121714 | intron_variant                                                                                                                |
| rs1165125144 | intron_variant                                                                                                                |
| rs1165132351 | intron_variant,genic_upstream_transcript_variant                                                                              |
| rs1165146285 | intron_variant,genic_upstream_transcript_variant                                                                              |
| rs1165148403 | intron_variant,genic_upstream_transcript_variant,upstream_transcript_variant                                                  |
| rs1165157994 | intron_variant                                                                                                                |
| rs1165292737 | intron_variant                                                                                                                |
| rs1165302861 | intron_variant,genic_upstream_transcript_variant,upstream_transcript_variant                                                  |
| rs1165313375 | genic_upstream_transcript_variant,intron_variant,2KB_upstream_variant,upstream_transcript_variant                             |
| rs1165402999 | intron_variant                                                                                                                |
| rs1165423544 | intron_variant,genic_upstream_transcript_variant,upstream_transcript_variant                                                  |
| rs1165504004 | intron_variant,genic_upstream_transcript_variant,upstream_transcript_variant                                                  |
| rs1165539754 | intron_variant                                                                                                                |
| rs1165565227 | intron_variant                                                                                                                |
| rs1165567562 | intron_variant,genic_upstream_transcript_variant                                                                              |
| rs1165578867 | intron_variant,genic_upstream_transcript_variant                                                                              |
| rs1165606252 | intron_variant,genic_downstream_transcript_variant                                                                            |
| rs1165631200 | intron_variant                                                                                                                |
| rs1165675906 | intron_variant,downstream_transcript_variant,genic_downstream_transcript_variant                                              |
| rs1165686183 | intron_variant                                                                                                                |
| rs1165713069 | intron_variant,genic_downstream_transcript_variant                                                                            |
| rs1165754188 | intron_variant,genic_downstream_transcript_variant                                                                            |
| rs1165765854 | intron_variant,genic_upstream_transcript_variant,upstream_transcript_variant                                                  |
| rs1165776302 | intron_variant,genic_upstream_transcript_variant                                                                              |
| rs1165786130 | intron_variant                                                                                                                |
| rs1165804438 | intron_variant                                                                                                                |
| rs1165815861 | intron_variant,genic_upstream_transcript_variant                                                                              |
| rs1165826797 | intron_variant                                                                                                                |
| rs1165938208 | intron_variant                                                                                                                |
| rs1165948294 | intron_variant                                                                                                                |
| rs1165953762 | intron_variant                                                                                                                |
| rs1165971256 | intron_variant,genic_downstream_transcript_variant                                                                            |
| rs1165981528 | intron_variant,genic_downstream_transcript_variant                                                                            |
| rs1165985876 | intron_variant,genic_downstream_transcript_variant                                                                            |
| rs1165988604 | intron_variant                                                                                                                |
| rs1166017128 | intron_variant                                                                                                                |
| rs1166019588 | intron_variant,genic_downstream_transcript_variant                                                                            |
| rs1166033796 | intron_variant                                                                                                                |
| rs1166097706 | intron_variant,genic_upstream_transcript_variant                                                                              |
| rs1166111910 | intron_variant,genic_upstream_transcript_variant                                                                              |
| rs1166144699 | intron_variant                                                                                                                |
| rs1166176802 | intron_variant,genic_upstream_transcript_variant                                                                              |
| rs1166204866 | intron_variant                                                                                                                |
| rs1166259596 | intron_variant,genic_upstream_transcript_variant                                                                              |
| rs1166285645 | intron_variant,genic_upstream_transcript_variant                                                                              |
| rs1166289922 | intron_variant,genic_upstream_transcript_variant                                                                              |
| rs1166301044 | intron_variant,genic_downstream_transcript_variant                                                                            |
| rs1166311950 | intron_variant,genic_upstream_transcript_variant                                                                              |
| rs1166344170 | synonymous_variant,non_coding_transcript_variant,coding_sequence_variant,missense_variant,genic_downstream_transcript_variant |
| rs1166368854 | intron_variant,genic_downstream_transcript_variant                                                                            |
| rs1166376725 | intron_variant                                                                                                                |
| rs1166447545 | intron_variant,genic_downstream_transcript_variant                                                                            |
| rs1166459036 | intron_variant,genic_upstream_transcript_variant                                                                              |
| rs1166503011 | intron_variant,genic_upstream_transcript_variant                                                                              |
| rs1166531812 | intron_variant                                                                                                                |
| rs1166537321 | intron_variant                                                                                                                |
| rs1166573602 | intron_variant                                                                                                                |
| rs1166581039 | intron_variant                                                                                                                |
| rs1166588783 | intron_variant                                                                                                                |
| rs1166603580 | intron_variant                                                                                                                |
| rs1166612551 | intron_variant,genic_downstream_transcript_variant                                                                            |
| rs1166652916 | missense_variant,non_coding_transcript_variant,genic_downstream_transcript_variant,coding_sequence_variant                    |
| rs1166667915 | intron_variant,genic_upstream_transcript_variant                                                                              |
| rs1166681331 | intron_variant                                                                                                                |
| rs1166681910 | intron_variant,genic_upstream_transcript_variant                                                                              |
| rs1166701935 | intron_variant,genic_downstream_transcript_variant                                                                            |
| rs1166708597 | intron_variant,genic_upstream_transcript_variant                                                                              |
| rs1166748457 | intron_variant,genic_upstream_transcript_variant,upstream_transcript_variant                                                  |
| rs1166750404 | intron_variant                                                                                                                |
| rs1166791252 | intron_variant                                                                                                                |

|              |                                                                                                                                            |
|--------------|--------------------------------------------------------------------------------------------------------------------------------------------|
| rs1166794481 | intron_variant                                                                                                                             |
| rs1166801810 | intron_variant,genic_upstream_transcript_variant                                                                                           |
| rs1166828541 | intron_variant,genic_downstream_transcript_variant                                                                                         |
| rs1166831331 | intron_variant,genic_downstream_transcript_variant                                                                                         |
| rs1166889661 | intron_variant                                                                                                                             |
| rs1166898798 | intron_variant,genic_upstream_transcript_variant                                                                                           |
| rs1166911788 | intron_variant                                                                                                                             |
| rs1166967081 | intron_variant,genic_upstream_transcript_variant                                                                                           |
| rs1166984006 | intron_variant                                                                                                                             |
| rs1167001399 | intron_variant                                                                                                                             |
| rs1167049299 | intron_variant,genic_downstream_transcript_variant                                                                                         |
| rs1167081672 | intron_variant,genic_downstream_transcript_variant                                                                                         |
| rs1167093562 | genic_upstream_transcript_variant,non_coding_transcript_variant,intron_variant,missense_variant,coding_sequence_variant                    |
| rs1167116930 | synonymous_variant,non_coding_transcript_variant,coding_sequence_variant                                                                   |
| rs1167142583 | intron_variant,genic_upstream_transcript_variant                                                                                           |
| rs1167148208 | intron_variant,genic_upstream_transcript_variant                                                                                           |
| rs1167174037 | intron_variant                                                                                                                             |
| rs1167198668 | intron_variant                                                                                                                             |
| rs1167231127 | intron_variant                                                                                                                             |
| rs1167273965 | intron_variant,genic_upstream_transcript_variant                                                                                           |
| rs1167290669 | 500B_downstream_variant,downstream_transcript_variant                                                                                      |
| rs1167296853 | intron_variant,genic_upstream_transcript_variant,upstream_transcript_variant                                                               |
| rs1167447816 | intron_variant,genic_upstream_transcript_variant,2KB_upstream_variant,upstream_transcript_variant                                          |
| rs1167449430 | intron_variant,genic_upstream_transcript_variant                                                                                           |
| rs1167462636 | intron_variant,genic_downstream_transcript_variant                                                                                         |
| rs1167477303 | intron_variant                                                                                                                             |
| rs1167486031 | intron_variant,genic_downstream_transcript_variant                                                                                         |
| rs1167502615 | genic_upstream_transcript_variant,intron_variant,2KB_upstream_variant,upstream_transcript_variant                                          |
| rs1167511848 | intron_variant,genic_upstream_transcript_variant                                                                                           |
| rs1167554347 | intron_variant,genic_upstream_transcript_variant                                                                                           |
| rs1167572256 | non_coding_transcript_variant,genic_downstream_transcript_variant,3_prime_UTR_variant                                                      |
| rs1167603693 | intron_variant,genic_upstream_transcript_variant                                                                                           |
| rs1167632895 | intron_variant,genic_upstream_transcript_variant,upstream_transcript_variant                                                               |
| rs1167763643 | intron_variant,genic_downstream_transcript_variant                                                                                         |
| rs1167775250 | intron_variant,genic_upstream_transcript_variant                                                                                           |
| rs1167804286 | intron_variant,genic_upstream_transcript_variant                                                                                           |
| rs1167820986 | intron_variant,genic_upstream_transcript_variant                                                                                           |
| rs1167848353 | intron_variant,genic_upstream_transcript_variant                                                                                           |
| rs1167851500 | genic_upstream_transcript_variant,synonymous_variant,non_coding_transcript_variant,intron_variant,missense_variant,coding_sequence_variant |
| rs1167857818 | intron_variant,genic_downstream_transcript_variant                                                                                         |
| rs1167875033 | intron_variant,genic_downstream_transcript_variant                                                                                         |
| rs1167912597 | intron_variant,genic_upstream_transcript_variant                                                                                           |
| rs1167927177 | intron_variant                                                                                                                             |
| rs1167930286 | intron_variant,genic_upstream_transcript_variant                                                                                           |
| rs1167978353 | intron_variant,genic_downstream_transcript_variant                                                                                         |
| rs1168002403 | intron_variant,genic_upstream_transcript_variant                                                                                           |
| rs1168066116 | intron_variant                                                                                                                             |
| rs1168091854 | genic_upstream_transcript_variant,non_coding_transcript_variant,intron_variant,missense_variant,coding_sequence_variant                    |
| rs1168117990 | genic_upstream_transcript_variant,intron_variant,2KB_upstream_variant,upstream_transcript_variant                                          |
| rs1168123302 | intron_variant                                                                                                                             |
| rs1168131760 | intron_variant,genic_upstream_transcript_variant                                                                                           |
| rs1168159294 | intron_variant                                                                                                                             |
| rs1168161261 | intron_variant,genic_downstream_transcript_variant                                                                                         |
| rs1168220004 | intron_variant                                                                                                                             |
| rs1168238440 | intron_variant,genic_upstream_transcript_variant                                                                                           |
| rs1168293105 | intron_variant,genic_upstream_transcript_variant                                                                                           |
| rs1168322724 | intron_variant,genic_upstream_transcript_variant                                                                                           |
| rs1168348760 | intron_variant,genic_upstream_transcript_variant                                                                                           |
| rs1168374891 | intron_variant,genic_upstream_transcript_variant                                                                                           |
| rs1168408802 | intron_variant                                                                                                                             |
| rs1168429884 | intron_variant,genic_downstream_transcript_variant                                                                                         |
| rs1168455925 | intron_variant                                                                                                                             |
| rs1168520580 | intron_variant                                                                                                                             |
| rs1168527840 | intron_variant                                                                                                                             |
| rs1168551672 | intron_variant,genic_upstream_transcript_variant,2KB_upstream_variant,upstream_transcript_variant                                          |
| rs1168587164 | intron_variant,genic_upstream_transcript_variant,upstream_transcript_variant                                                               |
| rs1168592008 | intron_variant,genic_upstream_transcript_variant                                                                                           |
| rs1168705329 | intron_variant,genic_upstream_transcript_variant                                                                                           |
| rs1168713178 | intron_variant,genic_upstream_transcript_variant                                                                                           |
| rs1168713978 | intron_variant,genic_upstream_transcript_variant                                                                                           |
| rs1168734224 | intron_variant,genic_upstream_transcript_variant                                                                                           |
| rs1168739007 | intron_variant,genic_upstream_transcript_variant                                                                                           |
| rs1168750141 | intron_variant,genic_downstream_transcript_variant                                                                                         |
| rs1168862161 | missense_variant,non_coding_transcript_variant,genic_downstream_transcript_variant,coding_sequence_variant                                 |

|              |                                                                                                            |
|--------------|------------------------------------------------------------------------------------------------------------|
| rs1168902391 | genic_upstream_transcript_variant,intron_variant,2KB_upstream_variant,upstream_transcript_variant          |
| rs1168919833 | intron_variant,genic_upstream_transcript_variant                                                           |
| rs1168929642 | intron_variant,genic_upstream_transcript_variant                                                           |
| rs1168935845 | intron_variant                                                                                             |
| rs1168937110 | intron_variant,genic_upstream_transcript_variant,2KB_upstream_variant,upstream_transcript_variant          |
| rs1168978989 | intron_variant,genic_upstream_transcript_variant                                                           |
| rs1168986019 | intron_variant                                                                                             |
| rs1169031386 | intron_variant,genic_upstream_transcript_variant                                                           |
| rs1169036700 | intron_variant,genic_downstream_transcript_variant                                                         |
| rs1169080179 | genic_upstream_transcript_variant,intron_variant,5_prime_UTR_variant,non_coding_transcript_variant         |
| rs1169112723 | intron_variant                                                                                             |
| rs1169143601 | intron_variant                                                                                             |
| rs1169157960 | intron_variant,genic_upstream_transcript_variant                                                           |
| rs1169170943 | intron_variant,genic_upstream_transcript_variant,2KB_upstream_variant,upstream_transcript_variant          |
| rs1169179255 | intron_variant                                                                                             |
| rs1169179300 | non_coding_transcript_variant,genic_downstream_transcript_variant,3_prime_UTR_variant                      |
| rs1169229138 | intron_variant,genic_upstream_transcript_variant                                                           |
| rs1169260312 | intron_variant,genic_upstream_transcript_variant                                                           |
| rs1169306917 | intron_variant                                                                                             |
| rs1169320835 | intron_variant                                                                                             |
| rs1169334989 | intron_variant,genic_upstream_transcript_variant                                                           |
| rs1169384064 | intron_variant                                                                                             |
| rs1169399730 | intron_variant,genic_upstream_transcript_variant                                                           |
| rs1169406106 | intron_variant                                                                                             |
| rs1169469478 | intron_variant                                                                                             |
| rs1169469820 | intron_variant                                                                                             |
| rs1169475877 | intron_variant,genic_upstream_transcript_variant                                                           |
| rs1169484546 | intron_variant,genic_upstream_transcript_variant                                                           |
| rs1169522914 | intron_variant,genic_downstream_transcript_variant                                                         |
| rs1169601704 | intron_variant,genic_upstream_transcript_variant                                                           |
| rs1169602037 | intron_variant,genic_downstream_transcript_variant                                                         |
| rs1169629750 | missense_variant,non_coding_transcript_variant,genic_downstream_transcript_variant,coding_sequence_variant |
| rs1169639570 | intron_variant                                                                                             |
| rs1169699790 | 500B_downstream_variant,downstream_transcript_variant                                                      |
| rs1169704975 | intron_variant                                                                                             |
| rs1169711073 | intron_variant,genic_downstream_transcript_variant                                                         |
| rs1169715802 | intron_variant,genic_upstream_transcript_variant                                                           |
| rs1169763656 | non_coding_transcript_variant,genic_downstream_transcript_variant,3_prime_UTR_variant                      |
| rs1169855481 | intron_variant,genic_upstream_transcript_variant                                                           |
| rs1169862200 | intron_variant,genic_downstream_transcript_variant                                                         |
| rs1169874294 | intron_variant                                                                                             |
| rs1169896187 | intron_variant,genic_downstream_transcript_variant                                                         |
| rs1170064943 | intron_variant                                                                                             |
| rs1170081826 | intron_variant                                                                                             |
| rs1170096703 | intron_variant                                                                                             |
| rs1170099567 | intron_variant,genic_upstream_transcript_variant                                                           |
| rs1170135408 | intron_variant,genic_downstream_transcript_variant                                                         |
| rs1170146791 | intron_variant                                                                                             |
| rs1170163526 | intron_variant                                                                                             |
| rs1170192752 | intron_variant,genic_upstream_transcript_variant                                                           |
| rs1170222568 | intron_variant,genic_upstream_transcript_variant                                                           |
| rs1170229319 | intron_variant,genic_upstream_transcript_variant                                                           |
| rs1170238205 | intron_variant,genic_downstream_transcript_variant                                                         |
| rs1170247308 | genic_upstream_transcript_variant,intron_variant,2KB_upstream_variant,upstream_transcript_variant          |
| rs1170252410 | intron_variant,genic_downstream_transcript_variant                                                         |
| rs1170280617 | genic_upstream_transcript_variant,intron_variant,2KB_upstream_variant,upstream_transcript_variant          |
| rs1170316245 | intron_variant                                                                                             |
| rs1170327786 | intron_variant,genic_upstream_transcript_variant                                                           |
| rs1170350487 | intron_variant                                                                                             |
| rs1170390091 | intron_variant,genic_upstream_transcript_variant                                                           |
| rs1170405392 | intron_variant                                                                                             |
| rs1170429295 | intron_variant                                                                                             |
| rs1170442625 | intron_variant,genic_upstream_transcript_variant                                                           |
| rs1170496578 | intron_variant                                                                                             |
| rs1170508478 | intron_variant                                                                                             |
| rs1170511553 | non_coding_transcript_variant,genic_downstream_transcript_variant,3_prime_UTR_variant                      |
| rs1170534401 | intron_variant,genic_downstream_transcript_variant                                                         |
| rs1170544966 | intron_variant,genic_upstream_transcript_variant                                                           |
| rs1170604838 | intron_variant,genic_downstream_transcript_variant                                                         |
| rs1170609772 | intron_variant                                                                                             |
| rs1170659481 | intron_variant,genic_upstream_transcript_variant,2KB_upstream_variant,upstream_transcript_variant          |
| rs1170672686 | intron_variant,genic_downstream_transcript_variant                                                         |
| rs1170717502 | genic_upstream_transcript_variant,intron_variant,2KB_upstream_variant,upstream_transcript_variant          |
| rs1170726921 | intron_variant,genic_upstream_transcript_variant                                                           |

|              |                                                                                                   |
|--------------|---------------------------------------------------------------------------------------------------|
| rs1170736301 | intron_variant,genic_upstream_transcript_variant,upstream_transcript_variant                      |
| rs1170739382 | intron_variant,genic_upstream_transcript_variant                                                  |
| rs1170770898 | intron_variant,genic_upstream_transcript_variant,upstream_transcript_variant                      |
| rs1170777166 | intron_variant,genic_upstream_transcript_variant                                                  |
| rs1170936390 | intron_variant,genic_upstream_transcript_variant                                                  |
| rs1170977619 | genic_upstream_transcript_variant,intron_variant,2KB_upstream_variant,upstream_transcript_variant |
| rs1171000027 | intron_variant,genic_upstream_transcript_variant                                                  |
| rs1171004836 | intron_variant,genic_downstream_transcript_variant                                                |
| rs1171019557 | intron_variant,genic_upstream_transcript_variant                                                  |
| rs1171052016 | intron_variant,genic_downstream_transcript_variant                                                |
| rs1171097970 | intron_variant,genic_upstream_transcript_variant                                                  |
| rs1171139476 | intron_variant,genic_upstream_transcript_variant                                                  |
| rs1171214311 | intron_variant,genic_downstream_transcript_variant                                                |
| rs1171296287 | genic_upstream_transcript_variant,intron_variant                                                  |
| rs1171302198 | intron_variant                                                                                    |
| rs1171330017 | intron_variant                                                                                    |
| rs1171406746 | intron_variant,genic_downstream_transcript_variant                                                |
| rs1171455840 | genic_upstream_transcript_variant,intron_variant                                                  |
| rs1171481048 | genic_upstream_transcript_variant,upstream_transcript_variant,intron_variant                      |
| rs1171489063 | intron_variant                                                                                    |
| rs1171529030 | genic_upstream_transcript_variant,intron_variant                                                  |
| rs1171533030 | intron_variant,genic_downstream_transcript_variant                                                |
| rs1171576050 | genic_upstream_transcript_variant,intron_variant                                                  |
| rs1171579825 | intron_variant                                                                                    |
| rs1171599552 | intron_variant                                                                                    |
| rs1171613576 | genic_upstream_transcript_variant,intron_variant                                                  |
| rs1171616127 | intron_variant                                                                                    |
| rs1171638535 | intron_variant,genic_downstream_transcript_variant                                                |
| rs1171697944 | genic_upstream_transcript_variant,intron_variant                                                  |
| rs1171747170 | intron_variant,genic_downstream_transcript_variant                                                |
| rs1171756972 | intron_variant                                                                                    |
| rs1171761931 | intron_variant,genic_downstream_transcript_variant                                                |
| rs1171778468 | genic_upstream_transcript_variant,intron_variant                                                  |
| rs1171785561 | intron_variant                                                                                    |
| rs1171808750 | intron_variant,genic_downstream_transcript_variant                                                |
| rs1171825076 | intron_variant                                                                                    |
| rs1171832510 | genic_upstream_transcript_variant,intron_variant                                                  |
| rs1171833631 | intron_variant                                                                                    |
| rs1171850900 | genic_upstream_transcript_variant,intron_variant                                                  |
| rs1171866537 | intron_variant,genic_downstream_transcript_variant                                                |
| rs1171870831 | intron_variant                                                                                    |
| rs1171900072 | genic_upstream_transcript_variant,upstream_transcript_variant,2KB_upstream_variant,intron_variant |
| rs1171942845 | intron_variant                                                                                    |
| rs1172019171 | intron_variant                                                                                    |
| rs1172036825 | intron_variant                                                                                    |
| rs1172093834 | intron_variant                                                                                    |
| rs1172120822 | intron_variant                                                                                    |
| rs1172127122 | 2KB_upstream_variant,genic_upstream_transcript_variant,upstream_transcript_variant,intron_variant |
| rs1172136124 | downstream_transcript_variant,500B_downstream_variant                                             |
| rs1172138511 | non_coding_transcript_variant,3_prime_UTR_variant,genic_downstream_transcript_variant             |
| rs1172244823 | intron_variant,genic_downstream_transcript_variant                                                |
| rs1172256472 | intron_variant                                                                                    |
| rs1172272386 | genic_upstream_transcript_variant,intron_variant                                                  |
| rs1172297155 | intron_variant                                                                                    |
| rs1172302902 | intron_variant                                                                                    |
| rs1172309642 | intron_variant,genic_downstream_transcript_variant                                                |
| rs1172345273 | intron_variant,genic_downstream_transcript_variant                                                |
| rs1172357278 | intron_variant                                                                                    |
| rs1172369826 | genic_upstream_transcript_variant,intron_variant                                                  |
| rs1172396460 | genic_upstream_transcript_variant,intron_variant                                                  |
| rs1172402433 | intron_variant                                                                                    |
| rs1172437377 | intron_variant                                                                                    |
| rs1172454283 | intron_variant                                                                                    |
| rs1172459787 | intron_variant                                                                                    |
| rs1172482469 | intron_variant,genic_downstream_transcript_variant                                                |
| rs1172490289 | intron_variant                                                                                    |
| rs1172501723 | intron_variant                                                                                    |
| rs1172539769 | 5_prime_UTR_variant,upstream_transcript_variant,genic_upstream_transcript_variant,intron_variant  |
| rs1172544218 | genic_upstream_transcript_variant,intron_variant                                                  |
| rs1172566930 | intron_variant                                                                                    |
| rs1172696888 | intron_variant                                                                                    |
| rs1172714209 | intron_variant                                                                                    |
| rs1172723667 | genic_upstream_transcript_variant,intron_variant                                                  |
| rs1172748233 | intron_variant,genic_downstream_transcript_variant                                                |

|              |                                                                                                              |
|--------------|--------------------------------------------------------------------------------------------------------------|
| rs1172791645 | genic_upstream_transcript_variant,intron_variant                                                             |
| rs1172793685 | genic_upstream_transcript_variant,intron_variant                                                             |
| rs1172825624 | genic_upstream_transcript_variant,intron_variant                                                             |
| rs1172827335 | genic_upstream_transcript_variant,upstream_transcript_variant,intron_variant                                 |
| rs1172856971 | intron_variant,genic_downstream_transcript_variant                                                           |
| rs1172857366 | genic_upstream_transcript_variant,intron_variant                                                             |
| rs1172889878 | genic_upstream_transcript_variant,intron_variant                                                             |
| rs1172902830 | genic_upstream_transcript_variant,intron_variant                                                             |
| rs1172919110 | genic_upstream_transcript_variant,intron_variant                                                             |
| rs1172928754 | genic_upstream_transcript_variant,intron_variant                                                             |
| rs1172939527 | genic_upstream_transcript_variant,intron_variant                                                             |
| rs1172958763 | intron_variant                                                                                               |
| rs1172984423 | intron_variant                                                                                               |
| rs1172986259 | 2KB_upstream_variant,genic_upstream_transcript_variant,upstream_transcript_variant,intron_variant            |
| rs1172996895 | genic_upstream_transcript_variant,intron_variant                                                             |
| rs1173022438 | intron_variant,genic_downstream_transcript_variant                                                           |
| rs1173051857 | genic_upstream_transcript_variant,intron_variant                                                             |
| rs1173065088 | genic_upstream_transcript_variant,intron_variant                                                             |
| rs1173096135 | intron_variant                                                                                               |
| rs1173114634 | genic_upstream_transcript_variant,intron_variant                                                             |
| rs1173144279 | genic_upstream_transcript_variant,intron_variant                                                             |
| rs1173147623 | intron_variant                                                                                               |
| rs1173150821 | genic_upstream_transcript_variant,intron_variant                                                             |
| rs1173162969 | genic_upstream_transcript_variant,intron_variant                                                             |
| rs1173220065 | genic_upstream_transcript_variant,intron_variant                                                             |
| rs1173234054 | intron_variant                                                                                               |
| rs1173285707 | intron_variant                                                                                               |
| rs1173290757 | genic_upstream_transcript_variant,intron_variant                                                             |
| rs1173320622 | genic_upstream_transcript_variant,intron_variant                                                             |
| rs1173328514 | intron_variant                                                                                               |
| rs1173357280 | intron_variant                                                                                               |
| rs1173372099 | 2KB_upstream_variant,genic_upstream_transcript_variant,upstream_transcript_variant,intron_variant            |
| rs1173372713 | intron_variant                                                                                               |
| rs1173396753 | intron_variant                                                                                               |
| rs1173424922 | non_coding_transcript_variant,3_prime_UTR_variant,genic_downstream_transcript_variant                        |
| rs1173453804 | intron_variant                                                                                               |
| rs1173460463 | intron_variant,genic_downstream_transcript_variant                                                           |
| rs1173464083 | genic_upstream_transcript_variant,intron_variant                                                             |
| rs1173491884 | intron_variant                                                                                               |
| rs1173504924 | intron_variant,genic_downstream_transcript_variant                                                           |
| rs1173505549 | intron_variant                                                                                               |
| rs1173529820 | 5_prime_UTR_variant,intron_variant                                                                           |
| rs1173571927 | intron_variant                                                                                               |
| rs1173589736 | intron_variant                                                                                               |
| rs1173605554 | genic_upstream_transcript_variant,intron_variant                                                             |
| rs1173648832 | genic_upstream_transcript_variant,intron_variant                                                             |
| rs1173658238 | non_coding_transcript_variant,3_prime_UTR_variant,genic_downstream_transcript_variant                        |
| rs1173670558 | intron_variant,genic_downstream_transcript_variant                                                           |
| rs1173687099 | intron_variant,genic_downstream_transcript_variant                                                           |
| rs1173717037 | genic_upstream_transcript_variant,intron_variant                                                             |
| rs1173766446 | genic_upstream_transcript_variant,intron_variant                                                             |
| rs1173767792 | intron_variant                                                                                               |
| rs1173795668 | intron_variant                                                                                               |
| rs1173826747 | intron_variant,genic_downstream_transcript_variant                                                           |
| rs1173837016 | intron_variant                                                                                               |
| rs1173852292 | intron_variant                                                                                               |
| rs1173853702 | intron_variant                                                                                               |
| rs1173898040 | genic_upstream_transcript_variant,intron_variant                                                             |
| rs1174007468 | intron_variant                                                                                               |
| rs1174024378 | intron_variant                                                                                               |
| rs1174026356 | genic_upstream_transcript_variant,intron_variant                                                             |
| rs1174049713 | intron_variant,genic_downstream_transcript_variant                                                           |
| rs1174053984 | genic_upstream_transcript_variant,intron_variant                                                             |
| rs1174057879 | intron_variant                                                                                               |
| rs1174071856 | genic_upstream_transcript_variant,intron_variant                                                             |
| rs1174143074 | intron_variant,genic_downstream_transcript_variant                                                           |
| rs1174161333 | genic_upstream_transcript_variant,intron_variant                                                             |
| rs1174164548 | intron_variant                                                                                               |
| rs1174171134 | intron_variant,genic_downstream_transcript_variant                                                           |
| rs1174193787 | synonymous_variant,coding_sequence_variant,non_coding_transcript_variant,genic_downstream_transcript_variant |
| rs1174196900 | intron_variant,genic_downstream_transcript_variant                                                           |
| rs1174214230 | genic_upstream_transcript_variant,intron_variant                                                             |
| rs1174225221 | intron_variant,genic_downstream_transcript_variant                                                           |
| rs1174234952 | intron_variant                                                                                               |

|              |                                                                              |
|--------------|------------------------------------------------------------------------------|
| rs1174260412 | genic_upstream_transcript_variant,upstream_transcript_variant,intron_variant |
| rs1174266989 | intron_variant,genic_downstream_transcript_variant                           |
| rs1174284061 | intron_variant,genic_downstream_transcript_variant                           |
| rs1174294996 | intron_variant,genic_downstream_transcript_variant                           |
| rs1174413040 | intron_variant                                                               |
| rs1174423550 | genic_upstream_transcript_variant,intron_variant                             |
| rs1174445292 | intron_variant                                                               |
| rs1174471966 | genic_upstream_transcript_variant,intron_variant                             |
| rs1174487675 | genic_upstream_transcript_variant,intron_variant                             |
| rs1174500379 | downstream_transcript_variant,500B_downstream_variant                        |
| rs1174529675 | genic_upstream_transcript_variant,intron_variant                             |
| rs1174543569 | genic_upstream_transcript_variant,intron_variant                             |
| rs1174580584 | intron_variant                                                               |
| rs1174656971 | intron_variant                                                               |
| rs1174673826 | genic_upstream_transcript_variant,intron_variant                             |
| rs1174704566 | intron_variant,genic_downstream_transcript_variant                           |
| rs1174759526 | intron_variant                                                               |
| rs1174786318 | intron_variant,genic_downstream_transcript_variant                           |
| rs1174795250 | genic_upstream_transcript_variant,intron_variant                             |
| rs1174803860 | intron_variant                                                               |
| rs1174812703 | genic_upstream_transcript_variant,intron_variant                             |
| rs1174825269 | intron_variant                                                               |
| rs1174841180 | genic_upstream_transcript_variant,intron_variant                             |
| rs1174843209 | intron_variant,genic_downstream_transcript_variant                           |
| rs1174848658 | genic_upstream_transcript_variant,intron_variant                             |
| rs1174868885 | genic_upstream_transcript_variant,intron_variant                             |
| rs1174873642 | genic_upstream_transcript_variant,intron_variant                             |
| rs1174912744 | intron_variant                                                               |
| rs1174982308 | genic_upstream_transcript_variant,intron_variant                             |
| rs1174996552 | intron_variant,genic_downstream_transcript_variant                           |
| rs1174998011 | genic_upstream_transcript_variant,intron_variant                             |
| rs1175062495 | genic_upstream_transcript_variant,intron_variant                             |
| rs1175076505 | intron_variant,genic_downstream_transcript_variant                           |
| rs1175149486 | intron_variant                                                               |
| rs1175196911 | genic_upstream_transcript_variant,intron_variant                             |
| rs1175251199 | intron_variant                                                               |
| rs1175338336 | genic_upstream_transcript_variant,intron_variant                             |
| rs1175339091 | genic_upstream_transcript_variant,intron_variant                             |
| rs1175359817 | intron_variant                                                               |
| rs1175384041 | intron_variant                                                               |
| rs1175407954 | genic_upstream_transcript_variant,intron_variant                             |
| rs1175430246 | intron_variant                                                               |
| rs1175458192 | genic_upstream_transcript_variant,intron_variant                             |
| rs1175466489 | intron_variant                                                               |
| rs1175490299 | genic_upstream_transcript_variant,intron_variant                             |
| rs1175522218 | genic_upstream_transcript_variant,intron_variant                             |
| rs1175526362 | intron_variant                                                               |
| rs1175540600 | genic_upstream_transcript_variant,intron_variant                             |
| rs1175546855 | intron_variant,genic_downstream_transcript_variant                           |
| rs1175558385 | genic_upstream_transcript_variant,intron_variant                             |
| rs1175558648 | genic_upstream_transcript_variant,intron_variant                             |
| rs1175606749 | genic_upstream_transcript_variant,intron_variant                             |
| rs1175627333 | intron_variant                                                               |
| rs1175638209 | intron_variant,genic_downstream_transcript_variant                           |
| rs1175669250 | intron_variant                                                               |
| rs1175669415 | intron_variant                                                               |
| rs1175728440 | intron_variant                                                               |
| rs1175737629 | intron_variant                                                               |
| rs1175743942 | genic_upstream_transcript_variant,intron_variant                             |
| rs1175776183 | genic_upstream_transcript_variant,intron_variant                             |
| rs1175792179 | intron_variant                                                               |
| rs1175801596 | genic_upstream_transcript_variant,intron_variant                             |
| rs1175843978 | genic_upstream_transcript_variant,intron_variant                             |
| rs1175857919 | intron_variant                                                               |
| rs1175872018 | intron_variant                                                               |
| rs1175879164 | genic_upstream_transcript_variant,intron_variant                             |
| rs1175900253 | intron_variant                                                               |
| rs1175987399 | intron_variant                                                               |
| rs1175990734 | genic_upstream_transcript_variant,upstream_transcript_variant,intron_variant |
| rs1176030083 | genic_upstream_transcript_variant,intron_variant                             |
| rs1176051274 | genic_upstream_transcript_variant,intron_variant                             |
| rs1176088481 | genic_upstream_transcript_variant,intron_variant                             |
| rs1176101100 | intron_variant,genic_downstream_transcript_variant                           |
| rs1176112251 | missense_variant,coding_sequence_variant,non_coding_transcript_variant       |

|              |                                                                                                   |
|--------------|---------------------------------------------------------------------------------------------------|
| rs1176165765 | intron_variant,genic_downstream_transcript_variant                                                |
| rs1176169561 | intron_variant,genic_downstream_transcript_variant                                                |
| rs1176194393 | genic_upstream_transcript_variant,intron_variant                                                  |
| rs1176194687 | genic_upstream_transcript_variant,intron_variant                                                  |
| rs1176206312 | intron_variant,genic_downstream_transcript_variant                                                |
| rs1176251872 | genic_upstream_transcript_variant,intron_variant                                                  |
| rs1176297406 | genic_upstream_transcript_variant,upstream_transcript_variant,intron_variant                      |
| rs1176324312 | intron_variant                                                                                    |
| rs1176339618 | intron_variant                                                                                    |
| rs1176346304 | intron_variant                                                                                    |
| rs1176352060 | intron_variant                                                                                    |
| rs1176356843 | non_coding_transcript_variant,3_prime_UTR_variant,genic_downstream_transcript_variant             |
| rs1176363163 | genic_upstream_transcript_variant,intron_variant                                                  |
| rs1176376514 | genic_upstream_transcript_variant,intron_variant                                                  |
| rs1176398078 | intron_variant                                                                                    |
| rs1176403422 | genic_upstream_transcript_variant,upstream_transcript_variant,intron_variant                      |
| rs1176425508 | intron_variant                                                                                    |
| rs1176443675 | intron_variant                                                                                    |
| rs1176471216 | intron_variant                                                                                    |
| rs1176483649 | intron_variant,genic_downstream_transcript_variant                                                |
| rs1176486564 | intron_variant,genic_downstream_transcript_variant                                                |
| rs1176490159 | intron_variant                                                                                    |
| rs1176548903 | intron_variant,genic_downstream_transcript_variant                                                |
| rs1176556418 | intron_variant                                                                                    |
| rs1176573271 | intron_variant,genic_downstream_transcript_variant                                                |
| rs1176615440 | genic_upstream_transcript_variant,intron_variant                                                  |
| rs1176619648 | intron_variant                                                                                    |
| rs1176627671 | intron_variant                                                                                    |
| rs1176639725 | genic_upstream_transcript_variant,intron_variant                                                  |
| rs1176656422 | intron_variant,genic_downstream_transcript_variant                                                |
| rs1176659582 | intron_variant                                                                                    |
| rs1176666682 | intron_variant,genic_downstream_transcript_variant                                                |
| rs1176675389 | genic_upstream_transcript_variant,intron_variant                                                  |
| rs1176684983 | intron_variant                                                                                    |
| rs1176703445 | intron_variant,genic_downstream_transcript_variant                                                |
| rs1176732224 | genic_upstream_transcript_variant,intron_variant                                                  |
| rs1176750613 | intron_variant,genic_downstream_transcript_variant                                                |
| rs1176753773 | genic_upstream_transcript_variant,intron_variant                                                  |
| rs1176757777 | intron_variant,genic_downstream_transcript_variant                                                |
| rs1176780606 | intron_variant                                                                                    |
| rs1176786648 | intron_variant,genic_downstream_transcript_variant                                                |
| rs1176794214 | intron_variant,genic_downstream_transcript_variant                                                |
| rs1176801475 | genic_upstream_transcript_variant,intron_variant                                                  |
| rs1176809820 | genic_upstream_transcript_variant,upstream_transcript_variant,intron_variant                      |
| rs1176817945 | intron_variant                                                                                    |
| rs1176880139 | intron_variant                                                                                    |
| rs1176890278 | intron_variant                                                                                    |
| rs1176895443 | genic_upstream_transcript_variant,intron_variant                                                  |
| rs1177016159 | intron_variant                                                                                    |
| rs1177018607 | intron_variant,genic_downstream_transcript_variant                                                |
| rs1177033389 | intron_variant                                                                                    |
| rs1177078744 | intron_variant                                                                                    |
| rs1177112883 | genic_upstream_transcript_variant,intron_variant                                                  |
| rs1177154202 | intron_variant                                                                                    |
| rs1177189009 | intron_variant                                                                                    |
| rs1177232712 | intron_variant                                                                                    |
| rs1177266873 | intron_variant,genic_downstream_transcript_variant                                                |
| rs1177317352 | intron_variant                                                                                    |
| rs1177334260 | intron_variant                                                                                    |
| rs1177340131 | genic_upstream_transcript_variant,intron_variant                                                  |
| rs1177388774 | genic_upstream_transcript_variant,intron_variant                                                  |
| rs1177464546 | genic_upstream_transcript_variant,upstream_transcript_variant,intron_variant                      |
| rs1177509178 | genic_upstream_transcript_variant,intron_variant                                                  |
| rs1177577753 | genic_upstream_transcript_variant,upstream_transcript_variant,2KB_upstream_variant,intron_variant |
| rs1177591481 | genic_upstream_transcript_variant,intron_variant                                                  |
| rs1177617568 | intron_variant,genic_downstream_transcript_variant                                                |
| rs1177677516 | intron_variant                                                                                    |
| rs1177735297 | genic_upstream_transcript_variant,intron_variant                                                  |
| rs1177845605 | intron_variant                                                                                    |
| rs1177895895 | genic_upstream_transcript_variant,intron_variant                                                  |
| rs1177909636 | genic_upstream_transcript_variant,intron_variant                                                  |
| rs1177931657 | intron_variant,genic_downstream_transcript_variant                                                |
| rs1177948363 | intron_variant,genic_downstream_transcript_variant                                                |
| rs1177964111 | intron_variant                                                                                    |

|              |                                                                                                                           |
|--------------|---------------------------------------------------------------------------------------------------------------------------|
| rs1177986500 | genic_upstream_transcript_variant,intron_variant                                                                          |
| rs1177991410 | intron_variant,genic_downstream_transcript_variant                                                                        |
| rs1178019868 | intron_variant,genic_downstream_transcript_variant                                                                        |
| rs1178038516 | intron_variant,genic_downstream_transcript_variant                                                                        |
| rs1178057688 | 2KB_upstream_variant,genic_upstream_transcript_variant,upstream_transcript_variant,intron_variant                         |
| rs1178071993 | intron_variant                                                                                                            |
| rs1178118813 | genic_upstream_transcript_variant,intron_variant                                                                          |
| rs1178150031 | genic_upstream_transcript_variant,intron_variant,coding_sequence_variant,non_coding_transcript_variant,synonymous_variant |
| rs1178159448 | genic_upstream_transcript_variant,intron_variant                                                                          |
| rs1178169917 | genic_upstream_transcript_variant,intron_variant                                                                          |
| rs1178172919 | intron_variant                                                                                                            |
| rs1178238693 | 2KB_upstream_variant,genic_upstream_transcript_variant,upstream_transcript_variant,intron_variant                         |
| rs1178244474 | genic_upstream_transcript_variant,intron_variant                                                                          |
| rs1178266474 | genic_upstream_transcript_variant,upstream_transcript_variant,intron_variant                                              |
| rs1178278280 | intron_variant                                                                                                            |
| rs1178321797 | intron_variant                                                                                                            |
| rs1178328105 | intron_variant                                                                                                            |
| rs1178355837 | intron_variant,genic_downstream_transcript_variant                                                                        |
| rs1178384187 | intron_variant                                                                                                            |
| rs1178399278 | genic_upstream_transcript_variant,intron_variant                                                                          |
| rs1178430025 | intron_variant                                                                                                            |
| rs1178507322 | intron_variant,genic_downstream_transcript_variant                                                                        |
| rs1178518112 | intron_variant                                                                                                            |
| rs1178659147 | 2KB_upstream_variant,genic_upstream_transcript_variant,upstream_transcript_variant,intron_variant                         |
| rs1178690804 | intron_variant                                                                                                            |
| rs1178717003 | intron_variant,genic_downstream_transcript_variant                                                                        |
| rs1178736227 | intron_variant                                                                                                            |
| rs1178747223 | intron_variant,genic_downstream_transcript_variant                                                                        |
| rs1178762351 | genic_upstream_transcript_variant,intron_variant                                                                          |
| rs1178763062 | genic_upstream_transcript_variant,intron_variant                                                                          |
| rs1178791647 | intron_variant,genic_downstream_transcript_variant                                                                        |
| rs1178798795 | intron_variant                                                                                                            |
| rs1178832992 | intron_variant                                                                                                            |
| rs1178846049 | genic_upstream_transcript_variant,intron_variant                                                                          |
| rs1178852623 | intron_variant                                                                                                            |
| rs1178871078 | genic_upstream_transcript_variant,intron_variant                                                                          |
| rs1178899349 | intron_variant,genic_downstream_transcript_variant                                                                        |
| rs1178903165 | genic_upstream_transcript_variant,intron_variant                                                                          |
| rs1178932986 | genic_upstream_transcript_variant,intron_variant                                                                          |
| rs1178986556 | genic_upstream_transcript_variant,intron_variant                                                                          |
| rs1179018154 | genic_upstream_transcript_variant,intron_variant                                                                          |
| rs1179038016 | intron_variant                                                                                                            |
| rs1179049270 | intron_variant                                                                                                            |
| rs1179097828 | intron_variant                                                                                                            |
| rs1179110414 | intron_variant                                                                                                            |
| rs1179117084 | genic_upstream_transcript_variant,intron_variant                                                                          |
| rs1179136922 | intron_variant                                                                                                            |
| rs1179161218 | intron_variant,genic_downstream_transcript_variant                                                                        |
| rs1179166455 | intron_variant                                                                                                            |
| rs1179192792 | intron_variant,genic_downstream_transcript_variant                                                                        |
| rs1179201081 | intron_variant                                                                                                            |
| rs1179228324 | genic_upstream_transcript_variant,intron_variant                                                                          |
| rs1179286304 | genic_upstream_transcript_variant,intron_variant                                                                          |
| rs1179289288 | intron_variant                                                                                                            |
| rs1179324298 | genic_upstream_transcript_variant,intron_variant                                                                          |
| rs1179408376 | genic_upstream_transcript_variant,intron_variant                                                                          |
| rs1179411664 | genic_upstream_transcript_variant,intron_variant                                                                          |
| rs1179422816 | genic_upstream_transcript_variant,intron_variant                                                                          |
| rs1179466519 | intron_variant                                                                                                            |
| rs1179513136 | genic_upstream_transcript_variant,intron_variant                                                                          |
| rs1179528378 | intron_variant                                                                                                            |
| rs1179552467 | intron_variant                                                                                                            |
| rs1179555616 | intron_variant                                                                                                            |
| rs1179608733 | intron_variant                                                                                                            |
| rs1179612756 | intron_variant                                                                                                            |
| rs1179630871 | genic_upstream_transcript_variant,intron_variant,non_coding_transcript_variant                                            |
| rs1179632454 | intron_variant                                                                                                            |
| rs1179633030 | genic_upstream_transcript_variant,intron_variant                                                                          |
| rs1179649860 | intron_variant,genic_downstream_transcript_variant                                                                        |
| rs1179678316 | genic_upstream_transcript_variant,intron_variant                                                                          |
| rs1179693447 | intron_variant,genic_downstream_transcript_variant                                                                        |
| rs1179696513 | intron_variant                                                                                                            |
| rs1179715527 | genic_upstream_transcript_variant,intron_variant                                                                          |
| rs1179719039 | genic_upstream_transcript_variant,upstream_transcript_variant,intron_variant                                              |

|              |                                                                                                            |
|--------------|------------------------------------------------------------------------------------------------------------|
| rs1179719284 | intron_variant                                                                                             |
| rs1179721785 | genic_upstream_transcript_variant,intron_variant                                                           |
| rs1179727686 | intron_variant                                                                                             |
| rs1179760074 | intron_variant                                                                                             |
| rs1179774327 | intron_variant                                                                                             |
| rs1179780006 | genic_upstream_transcript_variant,intron_variant                                                           |
| rs1179812235 | intron_variant                                                                                             |
| rs1179841598 | missense_variant,coding_sequence_variant,non_coding_transcript_variant                                     |
| rs1179900472 | genic_upstream_transcript_variant,intron_variant                                                           |
| rs1179986381 | intron_variant                                                                                             |
| rs1179991463 | genic_upstream_transcript_variant,intron_variant                                                           |
| rs1179996123 | intron_variant                                                                                             |
| rs1180042521 | intron_variant,genic_downstream_transcript_variant                                                         |
| rs1180052502 | genic_upstream_transcript_variant,intron_variant                                                           |
| rs1180112565 | genic_upstream_transcript_variant,intron_variant                                                           |
| rs1180126235 | genic_upstream_transcript_variant,intron_variant                                                           |
| rs1180238758 | genic_upstream_transcript_variant,intron_variant                                                           |
| rs1180319732 | intron_variant,genic_downstream_transcript_variant                                                         |
| rs1180346486 | intron_variant                                                                                             |
| rs1180352228 | genic_upstream_transcript_variant,intron_variant                                                           |
| rs1180415202 | missense_variant,coding_sequence_variant,non_coding_transcript_variant,genic_downstream_transcript_variant |
| rs1180424743 | intron_variant,genic_downstream_transcript_variant                                                         |
| rs1180434116 | intron_variant                                                                                             |
| rs1180443794 | intron_variant                                                                                             |
| rs1180445951 | genic_upstream_transcript_variant,intron_variant                                                           |
| rs1180541370 | intron_variant                                                                                             |
| rs1180572828 | intron_variant                                                                                             |
| rs1180648118 | downstream_transcript_variant,intron_variant,genic_downstream_transcript_variant                           |
| rs1180658080 | genic_upstream_transcript_variant,intron_variant                                                           |
| rs1180714899 | synonymous_variant,coding_sequence_variant,non_coding_transcript_variant                                   |
| rs1180735012 | intron_variant                                                                                             |
| rs1180802650 | genic_upstream_transcript_variant,intron_variant                                                           |
| rs1180891326 | intron_variant                                                                                             |
| rs1180950151 | intron_variant,genic_downstream_transcript_variant                                                         |
| rs1180987132 | genic_upstream_transcript_variant,intron_variant                                                           |
| rs1181016795 | genic_upstream_transcript_variant,intron_variant                                                           |
| rs1181026243 | intron_variant                                                                                             |
| rs1181043895 | genic_upstream_transcript_variant,intron_variant                                                           |
| rs1181080387 | intron_variant                                                                                             |
| rs1181093632 | intron_variant,genic_downstream_transcript_variant                                                         |
| rs1181123450 | genic_upstream_transcript_variant,intron_variant                                                           |
| rs1181221478 | intron_variant                                                                                             |
| rs1181250959 | 5_prime_UTR_variant,intron_variant                                                                         |
| rs1181329720 | intron_variant,genic_downstream_transcript_variant                                                         |
| rs1181335899 | genic_upstream_transcript_variant,intron_variant                                                           |
| rs1181347874 | genic_upstream_transcript_variant,intron_variant                                                           |
| rs1181371607 | genic_upstream_transcript_variant,intron_variant                                                           |
| rs1181386804 | genic_upstream_transcript_variant,intron_variant                                                           |
| rs1181399527 | genic_upstream_transcript_variant,intron_variant                                                           |
| rs1181428551 | intron_variant                                                                                             |
| rs1181576580 | genic_upstream_transcript_variant,intron_variant                                                           |
| rs1181623164 | intron_variant                                                                                             |
| rs1181625003 | genic_upstream_transcript_variant,intron_variant                                                           |
| rs1181629035 | genic_upstream_transcript_variant,intron_variant                                                           |
| rs1181647445 | intron_variant                                                                                             |
| rs1181677006 | genic_upstream_transcript_variant,intron_variant                                                           |
| rs1181699594 | genic_upstream_transcript_variant,intron_variant                                                           |
| rs1181711739 | genic_upstream_transcript_variant,intron_variant                                                           |
| rs1181733200 | genic_upstream_transcript_variant,intron_variant                                                           |
| rs1181735770 | intron_variant                                                                                             |
| rs1181749563 | intron_variant,genic_downstream_transcript_variant                                                         |
| rs1181783501 | genic_upstream_transcript_variant,intron_variant                                                           |
| rs1181862737 | intron_variant                                                                                             |
| rs1181902482 | intron_variant                                                                                             |
| rs1181912381 | genic_upstream_transcript_variant,intron_variant                                                           |
| rs1181917342 | intron_variant                                                                                             |
| rs1181933414 | genic_upstream_transcript_variant,intron_variant                                                           |
| rs1181937573 | genic_upstream_transcript_variant,intron_variant                                                           |
| rs1181937823 | intron_variant                                                                                             |
| rs1181970929 | intron_variant                                                                                             |
| rs1181971857 | genic_upstream_transcript_variant,intron_variant                                                           |
| rs1181992246 | 2KB_upstream_variant,genic_upstream_transcript_variant,upstream_transcript_variant,intron_variant          |
| rs1182042097 | genic_upstream_transcript_variant,intron_variant                                                           |
| rs1182047442 | intron_variant                                                                                             |

|              |                                                                                                                         |
|--------------|-------------------------------------------------------------------------------------------------------------------------|
| rs1182074623 | intron_variant                                                                                                          |
| rs1182095571 | intron_variant                                                                                                          |
| rs1182107281 | genic_upstream_transcript_variant,intron_variant                                                                        |
| rs1182144251 | genic_upstream_transcript_variant,intron_variant                                                                        |
| rs1182167119 | genic_upstream_transcript_variant,intron_variant                                                                        |
| rs1182171972 | intron_variant                                                                                                          |
| rs1182195735 | genic_upstream_transcript_variant,intron_variant,missense_variant,coding_sequence_variant,non_coding_transcript_variant |
| rs1182199807 | intron_variant                                                                                                          |
| rs1182222404 | intron_variant                                                                                                          |
| rs1182235649 | genic_upstream_transcript_variant,intron_variant                                                                        |
| rs1182270418 | intron_variant,genic_downstream_transcript_variant                                                                      |
| rs1182278082 | genic_upstream_transcript_variant,intron_variant                                                                        |
| rs1182296115 | intron_variant                                                                                                          |
| rs1182370361 | genic_upstream_transcript_variant,intron_variant                                                                        |
| rs1182374291 | genic_upstream_transcript_variant,intron_variant                                                                        |
| rs1182377188 | intron_variant                                                                                                          |
| rs1182382916 | genic_upstream_transcript_variant,intron_variant                                                                        |
| rs1182392002 | genic_upstream_transcript_variant,intron_variant                                                                        |
| rs1182416668 | intron_variant                                                                                                          |
| rs1182444042 | intron_variant                                                                                                          |
| rs1182456503 | genic_upstream_transcript_variant,intron_variant                                                                        |
| rs1182477142 | genic_upstream_transcript_variant,upstream_transcript_variant,intron_variant                                            |
| rs1182519145 | genic_upstream_transcript_variant,intron_variant                                                                        |
| rs1182535311 | intron_variant,genic_downstream_transcript_variant                                                                      |
| rs1182536342 | genic_upstream_transcript_variant,intron_variant                                                                        |
| rs1182567563 | intron_variant                                                                                                          |
| rs1182585858 | genic_upstream_transcript_variant,intron_variant                                                                        |
| rs1182616540 | intron_variant,genic_downstream_transcript_variant                                                                      |
| rs1182673514 | 2KB_upstream_variant,genic_upstream_transcript_variant,upstream_transcript_variant,intron_variant                       |
| rs1182727638 | non_coding_transcript_variant,3_prime_UTR_variant,genic_downstream_transcript_variant                                   |
| rs1182792913 | intron_variant                                                                                                          |
| rs1182813340 | intron_variant                                                                                                          |
| rs1182815939 | intron_variant                                                                                                          |
| rs1182842382 | genic_upstream_transcript_variant,intron_variant                                                                        |
| rs1182854061 | intron_variant                                                                                                          |
| rs1182902863 | intron_variant,genic_downstream_transcript_variant                                                                      |
| rs1182975356 | intron_variant,genic_downstream_transcript_variant                                                                      |
| rs1182979020 | genic_upstream_transcript_variant,intron_variant                                                                        |
| rs1182994959 | missense_variant,coding_sequence_variant,non_coding_transcript_variant                                                  |
| rs1183001020 | intron_variant                                                                                                          |
| rs1183061126 | intron_variant                                                                                                          |
| rs1183061745 | genic_upstream_transcript_variant,intron_variant                                                                        |
| rs1183073399 | genic_upstream_transcript_variant,intron_variant                                                                        |
| rs1183077121 | intron_variant                                                                                                          |
| rs1183108894 | genic_upstream_transcript_variant,intron_variant                                                                        |
| rs1183149433 | intron_variant,genic_downstream_transcript_variant                                                                      |
| rs1183188173 | intron_variant                                                                                                          |
| rs1183188357 | 2KB_upstream_variant,genic_upstream_transcript_variant,upstream_transcript_variant,intron_variant                       |
| rs1183196417 | intron_variant,genic_downstream_transcript_variant                                                                      |
| rs1183266937 | intron_variant                                                                                                          |
| rs1183274203 | intron_variant,genic_downstream_transcript_variant                                                                      |
| rs1183312827 | intron_variant,genic_downstream_transcript_variant                                                                      |
| rs1183357897 | genic_upstream_transcript_variant,intron_variant                                                                        |
| rs1183432579 | missense_variant,coding_sequence_variant,non_coding_transcript_variant                                                  |
| rs1183439365 | genic_upstream_transcript_variant,intron_variant                                                                        |
| rs1183452889 | genic_upstream_transcript_variant,intron_variant                                                                        |
| rs1183469757 | genic_upstream_transcript_variant,intron_variant                                                                        |
| rs1183521618 | intron_variant                                                                                                          |
| rs1183530779 | genic_upstream_transcript_variant,intron_variant                                                                        |
| rs1183546727 | genic_upstream_transcript_variant,intron_variant                                                                        |
| rs1183551764 | genic_upstream_transcript_variant,intron_variant                                                                        |
| rs1183562906 | genic_upstream_transcript_variant,intron_variant                                                                        |
| rs1183572881 | genic_upstream_transcript_variant,intron_variant                                                                        |
| rs1183675814 | intron_variant                                                                                                          |
| rs1183733283 | genic_upstream_transcript_variant,intron_variant                                                                        |
| rs1183772785 | intron_variant,genic_downstream_transcript_variant                                                                      |
| rs1183803972 | intron_variant                                                                                                          |
| rs1183914142 | non_coding_transcript_variant,genic_downstream_transcript_variant,3_prime_UTR_variant                                   |
| rs1183914509 | intron_variant,genic_downstream_transcript_variant                                                                      |
| rs1183918482 | genic_upstream_transcript_variant,intron_variant                                                                        |
| rs1183993896 | genic_upstream_transcript_variant,intron_variant                                                                        |
| rs1183996780 | genic_upstream_transcript_variant,intron_variant                                                                        |
| rs1184016460 | genic_upstream_transcript_variant,intron_variant                                                                        |
| rs1184039081 | intron_variant,synonymous_variant,coding_sequence_variant                                                               |

|              |                                                                                                              |
|--------------|--------------------------------------------------------------------------------------------------------------|
| rs1184050498 | intron_variant                                                                                               |
| rs1184108013 | genic_upstream_transcript_variant,intron_variant                                                             |
| rs1184164857 | intron_variant                                                                                               |
| rs1184180022 | intron_variant,genic_downstream_transcript_variant                                                           |
| rs1184213247 | genic_upstream_transcript_variant,intron_variant                                                             |
| rs1184234109 | intron_variant                                                                                               |
| rs1184278682 | non_coding_transcript_variant,genic_downstream_transcript_variant,3_prime_UTR_variant                        |
| rs1184287283 | genic_upstream_transcript_variant,intron_variant,non_coding_transcript_variant,5_prime_UTR_variant           |
| rs1184411865 | genic_upstream_transcript_variant,intron_variant                                                             |
| rs1184439616 | genic_upstream_transcript_variant,intron_variant                                                             |
| rs1184446203 | genic_upstream_transcript_variant,intron_variant                                                             |
| rs1184447026 | genic_upstream_transcript_variant,intron_variant                                                             |
| rs1184480106 | intron_variant                                                                                               |
| rs1184518741 | genic_upstream_transcript_variant,intron_variant                                                             |
| rs1184519275 | genic_upstream_transcript_variant,intron_variant,upstream_transcript_variant,2KB_upstream_variant            |
| rs1184543757 | genic_upstream_transcript_variant,intron_variant                                                             |
| rs1184751557 | genic_upstream_transcript_variant,intron_variant,upstream_transcript_variant,2KB_upstream_variant            |
| rs1184777056 | genic_upstream_transcript_variant,intron_variant                                                             |
| rs1184810400 | intron_variant,genic_downstream_transcript_variant                                                           |
| rs1184821629 | genic_upstream_transcript_variant,intron_variant                                                             |
| rs1184861283 | genic_upstream_transcript_variant,intron_variant                                                             |
| rs1184867871 | genic_upstream_transcript_variant,intron_variant                                                             |
| rs1184876759 | genic_upstream_transcript_variant,intron_variant                                                             |
| rs1184886521 | intron_variant,genic_downstream_transcript_variant                                                           |
| rs1184897454 | genic_upstream_transcript_variant,intron_variant                                                             |
| rs1184908762 | genic_upstream_transcript_variant,intron_variant                                                             |
| rs1184913993 | intron_variant                                                                                               |
| rs1184920952 | genic_upstream_transcript_variant,intron_variant                                                             |
| rs1184968324 | intron_variant,genic_downstream_transcript_variant                                                           |
| rs1184978892 | genic_upstream_transcript_variant,intron_variant                                                             |
| rs1184992839 | genic_upstream_transcript_variant,intron_variant,upstream_transcript_variant,2KB_upstream_variant            |
| rs1185038228 | genic_upstream_transcript_variant,intron_variant                                                             |
| rs1185094780 | genic_upstream_transcript_variant,intron_variant,upstream_transcript_variant                                 |
| rs1185113109 | genic_upstream_transcript_variant,intron_variant                                                             |
| rs1185122218 | intron_variant,genic_downstream_transcript_variant                                                           |
| rs1185124782 | intron_variant                                                                                               |
| rs1185136442 | genic_upstream_transcript_variant,intron_variant,upstream_transcript_variant,2KB_upstream_variant            |
| rs1185137783 | intron_variant                                                                                               |
| rs1185159155 | genic_upstream_transcript_variant,intron_variant                                                             |
| rs1185255167 | genic_upstream_transcript_variant,intron_variant                                                             |
| rs1185302327 | genic_upstream_transcript_variant,intron_variant                                                             |
| rs1185329274 | intron_variant,genic_downstream_transcript_variant                                                           |
| rs1185332869 | non_coding_transcript_variant,missense_variant,coding_sequence_variant,genic_downstream_transcript_variant   |
| rs1185350191 | genic_upstream_transcript_variant,intron_variant,upstream_transcript_variant,2KB_upstream_variant            |
| rs1185364519 | genic_upstream_transcript_variant,intron_variant                                                             |
| rs1185376042 | non_coding_transcript_variant,genic_downstream_transcript_variant,3_prime_UTR_variant                        |
| rs1185378046 | intron_variant                                                                                               |
| rs1185405023 | genic_upstream_transcript_variant,intron_variant                                                             |
| rs1185411980 | intron_variant,genic_downstream_transcript_variant                                                           |
| rs1185427296 | intron_variant,genic_downstream_transcript_variant                                                           |
| rs1185463944 | intron_variant                                                                                               |
| rs1185474446 | intron_variant,genic_downstream_transcript_variant                                                           |
| rs1185475324 | non_coding_transcript_variant,synonymous_variant,coding_sequence_variant,genic_downstream_transcript_variant |
| rs1185486891 | intron_variant                                                                                               |
| rs1185512794 | genic_upstream_transcript_variant,intron_variant                                                             |
| rs1185542918 | intron_variant                                                                                               |
| rs1185569741 | genic_upstream_transcript_variant,intron_variant                                                             |
| rs1185584399 | intron_variant,genic_downstream_transcript_variant                                                           |
| rs1185600595 | genic_upstream_transcript_variant,intron_variant                                                             |
| rs1185613967 | genic_upstream_transcript_variant,intron_variant,5_prime_UTR_variant,upstream_transcript_variant             |
| rs1185633833 | genic_upstream_transcript_variant,intron_variant                                                             |
| rs1185673160 | intron_variant,genic_downstream_transcript_variant                                                           |
| rs1185697520 | intron_variant                                                                                               |
| rs1185748076 | genic_upstream_transcript_variant,intron_variant,upstream_transcript_variant                                 |
| rs1185749827 | genic_upstream_transcript_variant,intron_variant                                                             |
| rs1185766732 | genic_upstream_transcript_variant,intron_variant                                                             |
| rs1185809498 | intron_variant                                                                                               |
| rs1185819293 | genic_upstream_transcript_variant,intron_variant                                                             |
| rs1185848010 | intron_variant,genic_downstream_transcript_variant                                                           |
| rs1185873097 | genic_upstream_transcript_variant,intron_variant                                                             |
| rs1185928520 | genic_upstream_transcript_variant,intron_variant                                                             |
| rs1185930107 | genic_upstream_transcript_variant,intron_variant                                                             |
| rs1185942285 | intron_variant,genic_downstream_transcript_variant,downstream_transcript_variant                             |
| rs1185955047 | intron_variant                                                                                               |

|              |                                                                                                                         |
|--------------|-------------------------------------------------------------------------------------------------------------------------|
| rs1185989542 | genic_upstream_transcript_variant,intron_variant                                                                        |
| rs1185993226 | intron_variant                                                                                                          |
| rs1186001279 | intron_variant                                                                                                          |
| rs1186004212 | intron_variant                                                                                                          |
| rs1186019769 | intron_variant                                                                                                          |
| rs1186030251 | intron_variant                                                                                                          |
| rs1186035834 | intron_variant                                                                                                          |
| rs1186038432 | intron_variant                                                                                                          |
| rs1186106153 | intron_variant                                                                                                          |
| rs1186162203 | intron_variant                                                                                                          |
| rs1186178731 | genic_upstream_transcript_variant,intron_variant,upstream_transcript_variant                                            |
| rs1186233516 | genic_upstream_transcript_variant,intron_variant                                                                        |
| rs1186244987 | intron_variant,genic_downstream_transcript_variant,downstream_transcript_variant                                        |
| rs1186277583 | intron_variant                                                                                                          |
| rs1186283555 | intron_variant                                                                                                          |
| rs1186293841 | intron_variant,genic_downstream_transcript_variant                                                                      |
| rs1186299119 | genic_upstream_transcript_variant,intron_variant                                                                        |
| rs1186329287 | genic_upstream_transcript_variant,intron_variant                                                                        |
| rs1186348281 | intron_variant,genic_downstream_transcript_variant                                                                      |
| rs1186351244 | genic_upstream_transcript_variant,intron_variant                                                                        |
| rs1186383397 | intron_variant                                                                                                          |
| rs1186391190 | intron_variant                                                                                                          |
| rs1186404464 | genic_upstream_transcript_variant,intron_variant                                                                        |
| rs1186419363 | intron_variant,genic_downstream_transcript_variant                                                                      |
| rs1186500182 | intron_variant                                                                                                          |
| rs1186503486 | genic_upstream_transcript_variant,intron_variant                                                                        |
| rs1186534812 | genic_upstream_transcript_variant,intron_variant                                                                        |
| rs1186539590 | genic_upstream_transcript_variant,intron_variant                                                                        |
| rs1186545504 | genic_upstream_transcript_variant,intron_variant                                                                        |
| rs1186556354 | non_coding_transcript_variant,genic_downstream_transcript_variant,3_prime_UTR_variant                                   |
| rs1186617133 | genic_upstream_transcript_variant,intron_variant                                                                        |
| rs1186643105 | intron_variant,genic_downstream_transcript_variant                                                                      |
| rs1186662704 | intron_variant,genic_downstream_transcript_variant                                                                      |
| rs1186664981 | genic_upstream_transcript_variant,intron_variant                                                                        |
| rs1186781402 | non_coding_transcript_variant,synonymous_variant,coding_sequence_variant,genic_downstream_transcript_variant            |
| rs1186797358 | intron_variant                                                                                                          |
| rs1186805665 | intron_variant                                                                                                          |
| rs1186884591 | genic_upstream_transcript_variant,intron_variant                                                                        |
| rs1186911329 | synonymous_variant,coding_sequence_variant,non_coding_transcript_variant                                                |
| rs1186969699 | intron_variant                                                                                                          |
| rs1186978034 | coding_sequence_variant,intron_variant,genic_upstream_transcript_variant,missense_variant,non_coding_transcript_variant |
| rs1186982648 | genic_upstream_transcript_variant,intron_variant                                                                        |
| rs1187028971 | intron_variant,genic_downstream_transcript_variant                                                                      |
| rs1187052314 | genic_upstream_transcript_variant,intron_variant                                                                        |
| rs1187064095 | intron_variant,genic_downstream_transcript_variant                                                                      |
| rs1187080461 | intron_variant                                                                                                          |
| rs1187102621 | intron_variant                                                                                                          |
| rs1187113396 | intron_variant                                                                                                          |
| rs1187134285 | genic_upstream_transcript_variant,intron_variant                                                                        |
| rs1187180018 | intron_variant                                                                                                          |
| rs1187258289 | intron_variant                                                                                                          |
| rs1187275743 | intron_variant                                                                                                          |
| rs1187285584 | genic_upstream_transcript_variant,intron_variant                                                                        |
| rs1187287184 | intron_variant,genic_downstream_transcript_variant                                                                      |
| rs1187316785 | intron_variant                                                                                                          |
| rs1187364611 | intron_variant                                                                                                          |
| rs1187389058 | genic_upstream_transcript_variant,intron_variant                                                                        |
| rs1187400392 | intron_variant                                                                                                          |
| rs1187407134 | intron_variant,genic_downstream_transcript_variant                                                                      |
| rs1187413182 | intron_variant,genic_downstream_transcript_variant                                                                      |
| rs1187413403 | genic_upstream_transcript_variant,intron_variant                                                                        |
| rs1187458149 | intron_variant,genic_downstream_transcript_variant                                                                      |
| rs1187524970 | genic_upstream_transcript_variant,intron_variant                                                                        |
| rs1187530086 | intron_variant,genic_downstream_transcript_variant                                                                      |
| rs1187547063 | genic_upstream_transcript_variant,intron_variant                                                                        |
| rs1187552730 | intron_variant                                                                                                          |
| rs1187627139 | intron_variant,genic_downstream_transcript_variant                                                                      |
| rs1187640312 | genic_upstream_transcript_variant,intron_variant                                                                        |
| rs1187683666 | intron_variant,genic_downstream_transcript_variant                                                                      |
| rs1187706154 | intron_variant                                                                                                          |
| rs1187783281 | genic_upstream_transcript_variant,intron_variant,upstream_transcript_variant,2KB_upstream_variant                       |
| rs1187788796 | genic_upstream_transcript_variant,intron_variant                                                                        |
| rs1187789939 | intron_variant                                                                                                          |
| rs1187866189 | genic_upstream_transcript_variant,intron_variant                                                                        |

|              |                                                                                                              |
|--------------|--------------------------------------------------------------------------------------------------------------|
| rs1187891585 | intron_variant                                                                                               |
| rs1187906951 | intron_variant                                                                                               |
| rs1187910563 | genic_upstream_transcript_variant,intron_variant                                                             |
| rs1187910936 | genic_upstream_transcript_variant,intron_variant                                                             |
| rs1187920771 | genic_upstream_transcript_variant,intron_variant                                                             |
| rs1187924542 | genic_upstream_transcript_variant,intron_variant                                                             |
| rs1187952229 | intron_variant                                                                                               |
| rs1187977848 | intron_variant                                                                                               |
| rs1188098995 | intron_variant                                                                                               |
| rs1188105869 | intron_variant                                                                                               |
| rs1188135173 | intron_variant                                                                                               |
| rs1188173431 | non_coding_transcript_variant,genic_downstream_transcript_variant,3_prime_UTR_variant                        |
| rs1188192255 | genic_upstream_transcript_variant,intron_variant                                                             |
| rs1188199660 | intron_variant                                                                                               |
| rs1188238914 | genic_upstream_transcript_variant,intron_variant                                                             |
| rs1188280003 | intron_variant,genic_downstream_transcript_variant                                                           |
| rs1188318770 | genic_upstream_transcript_variant,intron_variant,upstream_transcript_variant                                 |
| rs1188411615 | genic_upstream_transcript_variant,intron_variant                                                             |
| rs1188416984 | intron_variant                                                                                               |
| rs1188418376 | intron_variant                                                                                               |
| rs1188426370 | genic_upstream_transcript_variant,intron_variant                                                             |
| rs1188432095 | non_coding_transcript_variant,synonymous_variant,coding_sequence_variant,genic_downstream_transcript_variant |
| rs1188492067 | genic_upstream_transcript_variant,intron_variant                                                             |
| rs1188495304 | intron_variant                                                                                               |
| rs1188499050 | genic_upstream_transcript_variant,intron_variant                                                             |
| rs1188522406 | intron_variant                                                                                               |
| rs1188552152 | genic_upstream_transcript_variant,intron_variant                                                             |
| rs1188556392 | genic_upstream_transcript_variant,intron_variant                                                             |
| rs1188598291 | intron_variant,genic_downstream_transcript_variant                                                           |
| rs1188616642 | genic_upstream_transcript_variant,intron_variant                                                             |
| rs1188670893 | intron_variant,genic_downstream_transcript_variant                                                           |
| rs1188683004 | intron_variant                                                                                               |
| rs1188692557 | genic_upstream_transcript_variant,intron_variant                                                             |
| rs1188701260 | genic_upstream_transcript_variant,intron_variant                                                             |
| rs1188703906 | intron_variant,genic_downstream_transcript_variant                                                           |
| rs1188713421 | intron_variant                                                                                               |
| rs1188749918 | intron_variant                                                                                               |
| rs1188824082 | non_coding_transcript_variant,genic_downstream_transcript_variant,3_prime_UTR_variant                        |
| rs1188855432 | intron_variant                                                                                               |
| rs1188882005 | genic_upstream_transcript_variant,intron_variant                                                             |
| rs1188903987 | intron_variant,genic_downstream_transcript_variant                                                           |
| rs1188924741 | non_coding_transcript_variant,genic_downstream_transcript_variant,3_prime_UTR_variant                        |
| rs1188931794 | intron_variant,genic_downstream_transcript_variant                                                           |
| rs1188940748 | intron_variant,genic_downstream_transcript_variant                                                           |
| rs1188963992 | intron_variant,genic_downstream_transcript_variant                                                           |
| rs1188974766 | intron_variant,genic_downstream_transcript_variant                                                           |
| rs1188991544 | intron_variant                                                                                               |
| rs1188994543 | intron_variant,genic_downstream_transcript_variant                                                           |
| rs1189027178 | genic_upstream_transcript_variant,intron_variant                                                             |
| rs1189042271 | genic_upstream_transcript_variant,intron_variant                                                             |
| rs1189071750 | intron_variant                                                                                               |
| rs1189093834 | genic_upstream_transcript_variant,intron_variant                                                             |
| rs1189153016 | intron_variant,genic_downstream_transcript_variant                                                           |
| rs1189239268 | intron_variant,genic_downstream_transcript_variant                                                           |
| rs1189271616 | intron_variant                                                                                               |
| rs1189287335 | intron_variant                                                                                               |
| rs1189309346 | genic_upstream_transcript_variant,intron_variant                                                             |
| rs1189321026 | genic_upstream_transcript_variant,intron_variant                                                             |
| rs1189329783 | intron_variant                                                                                               |
| rs1189351867 | intron_variant,genic_downstream_transcript_variant                                                           |
| rs1189359898 | intron_variant                                                                                               |
| rs1189364030 | intron_variant,genic_downstream_transcript_variant                                                           |
| rs1189410832 | intron_variant,genic_downstream_transcript_variant                                                           |
| rs1189432573 | intron_variant                                                                                               |
| rs1189434811 | intron_variant                                                                                               |
| rs1189442726 | genic_upstream_transcript_variant,intron_variant                                                             |
| rs1189450252 | genic_upstream_transcript_variant,intron_variant                                                             |
| rs1189478343 | genic_upstream_transcript_variant,intron_variant                                                             |
| rs1189489197 | genic_upstream_transcript_variant,intron_variant                                                             |
| rs1189518657 | intron_variant                                                                                               |
| rs1189521067 | intron_variant                                                                                               |
| rs1189527607 | intron_variant                                                                                               |
| rs1189533257 | intron_variant                                                                                               |
| rs1189539887 | genic_upstream_transcript_variant,intron_variant,upstream_transcript_variant                                 |

|              |                                                                                                    |
|--------------|----------------------------------------------------------------------------------------------------|
| rs1189573292 | intron_variant                                                                                     |
| rs1189614710 | genic_upstream_transcript_variant,intron_variant                                                   |
| rs1189614815 | intron_variant,genic_downstream_transcript_variant                                                 |
| rs1189682261 | genic_upstream_transcript_variant,intron_variant                                                   |
| rs1189706970 | genic_upstream_transcript_variant,intron_variant                                                   |
| rs1189773940 | genic_upstream_transcript_variant,intron_variant                                                   |
| rs1189819895 | intron_variant,genic_downstream_transcript_variant                                                 |
| rs1189827328 | intron_variant,genic_downstream_transcript_variant                                                 |
| rs1189842704 | genic_upstream_transcript_variant,intron_variant                                                   |
| rs1189843223 | intron_variant,genic_downstream_transcript_variant                                                 |
| rs1189855432 | intron_variant                                                                                     |
| rs1189872940 | genic_upstream_transcript_variant,intron_variant                                                   |
| rs1189878919 | intron_variant                                                                                     |
| rs1189900234 | intron_variant                                                                                     |
| rs1189967753 | non_coding_transcript_variant,genic_downstream_transcript_variant,3_prime_UTR_variant              |
| rs1189997744 | intron_variant                                                                                     |
| rs1190041274 | genic_upstream_transcript_variant,intron_variant,upstream_transcript_variant                       |
| rs1190056549 | genic_upstream_transcript_variant,intron_variant,upstream_transcript_variant,2KB_upstream_variant  |
| rs1190099358 | intron_variant                                                                                     |
| rs1190102177 | intron_variant                                                                                     |
| rs1190125463 | genic_upstream_transcript_variant,intron_variant                                                   |
| rs1190129568 | intron_variant                                                                                     |
| rs1190151541 | intron_variant                                                                                     |
| rs1190165468 | intron_variant                                                                                     |
| rs1190211329 | intron_variant                                                                                     |
| rs1190214640 | intron_variant,genic_downstream_transcript_variant                                                 |
| rs1190215128 | genic_upstream_transcript_variant,intron_variant                                                   |
| rs1190215773 | genic_upstream_transcript_variant,intron_variant,upstream_transcript_variant                       |
| rs1190224150 | genic_upstream_transcript_variant,intron_variant                                                   |
| rs1190232962 | intron_variant                                                                                     |
| rs1190248948 | intron_variant                                                                                     |
| rs1190269987 | genic_upstream_transcript_variant,intron_variant                                                   |
| rs1190275940 | genic_upstream_transcript_variant,intron_variant,upstream_transcript_variant                       |
| rs1190293995 | genic_upstream_transcript_variant,intron_variant,5_prime_UTR_variant,non_coding_transcript_variant |
| rs1190302422 | genic_upstream_transcript_variant,intron_variant                                                   |
| rs1190312920 | missense_variant,intron_variant,coding_sequence_variant                                            |
| rs1190322356 | intron_variant                                                                                     |
| rs1190345221 | genic_upstream_transcript_variant,intron_variant                                                   |
| rs1190350092 | genic_upstream_transcript_variant,intron_variant                                                   |
| rs1190369853 | intron_variant                                                                                     |
| rs1190375756 | genic_upstream_transcript_variant,intron_variant                                                   |
| rs1190383990 | genic_upstream_transcript_variant,intron_variant                                                   |
| rs1190394192 | genic_upstream_transcript_variant,intron_variant,upstream_transcript_variant,2KB_upstream_variant  |
| rs1190419241 | genic_upstream_transcript_variant,intron_variant                                                   |
| rs1190433463 | intron_variant                                                                                     |
| rs1190542558 | genic_upstream_transcript_variant,intron_variant                                                   |
| rs1190594506 | genic_upstream_transcript_variant,intron_variant                                                   |
| rs1190660146 | intron_variant                                                                                     |
| rs1190662710 | genic_upstream_transcript_variant,intron_variant                                                   |
| rs1190722053 | intron_variant,genic_downstream_transcript_variant                                                 |
| rs1190746319 | intron_variant                                                                                     |
| rs1190753468 | genic_upstream_transcript_variant,intron_variant                                                   |
| rs1190758534 | non_coding_transcript_variant,genic_downstream_transcript_variant,3_prime_UTR_variant              |
| rs1190767833 | genic_upstream_transcript_variant,intron_variant                                                   |
| rs1190783798 | genic_upstream_transcript_variant,intron_variant                                                   |
| rs1190821770 | intron_variant                                                                                     |
| rs1190849945 | genic_upstream_transcript_variant,intron_variant                                                   |
| rs1190870151 | intron_variant                                                                                     |
| rs1190898645 | intron_variant,genic_downstream_transcript_variant                                                 |
| rs1190913769 | genic_upstream_transcript_variant,intron_variant                                                   |
| rs1190917231 | genic_upstream_transcript_variant,intron_variant                                                   |
| rs1190932576 | genic_upstream_transcript_variant,intron_variant,upstream_transcript_variant                       |
| rs1190983579 | genic_upstream_transcript_variant,intron_variant                                                   |
| rs1190992162 | genic_upstream_transcript_variant,intron_variant                                                   |
| rs1191002994 | intron_variant                                                                                     |
| rs1191034725 | genic_upstream_transcript_variant,intron_variant                                                   |
| rs1191077226 | intron_variant                                                                                     |
| rs1191157440 | intron_variant,genic_downstream_transcript_variant                                                 |
| rs1191212638 | genic_upstream_transcript_variant,intron_variant                                                   |
| rs1191215964 | intron_variant                                                                                     |
| rs1191251944 | genic_upstream_transcript_variant,intron_variant                                                   |
| rs1191268181 | genic_upstream_transcript_variant,intron_variant                                                   |
| rs1191288875 | intron_variant                                                                                     |
| rs1191329800 | genic_upstream_transcript_variant,intron_variant                                                   |

|              |                                                                                                              |
|--------------|--------------------------------------------------------------------------------------------------------------|
| rs1191332920 | intron_variant                                                                                               |
| rs1191342063 | genic_upstream_transcript_variant,intron_variant                                                             |
| rs1191375188 | intron_variant                                                                                               |
| rs1191381216 | non_coding_transcript_variant,missense_variant,coding_sequence_variant,genic_downstream_transcript_variant   |
| rs1191390259 | non_coding_transcript_variant,genic_downstream_transcript_variant,3_prime_UTR_variant                        |
| rs1191430646 | intron_variant,genic_downstream_transcript_variant                                                           |
| rs1191452162 | intron_variant                                                                                               |
| rs1191491473 | genic_upstream_transcript_variant,intron_variant                                                             |
| rs1191500434 | genic_upstream_transcript_variant,intron_variant                                                             |
| rs1191560881 | intron_variant                                                                                               |
| rs1191561099 | genic_upstream_transcript_variant,intron_variant                                                             |
| rs1191569963 | genic_upstream_transcript_variant,intron_variant,upstream_transcript_variant                                 |
| rs1191573394 | intron_variant                                                                                               |
| rs1191579792 | genic_upstream_transcript_variant,intron_variant                                                             |
| rs1191592629 | non_coding_transcript_variant,missense_variant,coding_sequence_variant,genic_downstream_transcript_variant   |
| rs1191660181 | genic_upstream_transcript_variant,intron_variant                                                             |
| rs1191675784 | genic_upstream_transcript_variant,intron_variant,upstream_transcript_variant                                 |
| rs1191685647 | intron_variant                                                                                               |
| rs1191690392 | intron_variant                                                                                               |
| rs1191742801 | intron_variant,genic_downstream_transcript_variant                                                           |
| rs1191751281 | intron_variant,genic_downstream_transcript_variant                                                           |
| rs1191752543 | genic_upstream_transcript_variant,intron_variant                                                             |
| rs1191764562 | genic_upstream_transcript_variant,intron_variant                                                             |
| rs1191770065 | intron_variant,genic_downstream_transcript_variant                                                           |
| rs1191775765 | genic_upstream_transcript_variant,intron_variant,upstream_transcript_variant                                 |
| rs1191833507 | genic_upstream_transcript_variant,intron_variant                                                             |
| rs1191847561 | intron_variant,5_prime_UTR_variant                                                                           |
| rs1191916384 | intron_variant                                                                                               |
| rs1191935030 | intron_variant                                                                                               |
| rs1191956704 | synonymous_variant,coding_sequence_variant,non_coding_transcript_variant                                     |
| rs1191975404 | genic_upstream_transcript_variant,intron_variant,upstream_transcript_variant,2KB_upstream_variant            |
| rs1191980170 | genic_upstream_transcript_variant,intron_variant                                                             |
| rs1192022152 | genic_upstream_transcript_variant,intron_variant                                                             |
| rs1192060925 | intron_variant                                                                                               |
| rs1192103124 | intron_variant                                                                                               |
| rs1192157862 | genic_upstream_transcript_variant,intron_variant,5_prime_UTR_variant,non_coding_transcript_variant           |
| rs1192191666 | intron_variant                                                                                               |
| rs1192194220 | intron_variant,genic_downstream_transcript_variant                                                           |
| rs1192207235 | intron_variant                                                                                               |
| rs1192214422 | genic_upstream_transcript_variant,intron_variant                                                             |
| rs1192224668 | intron_variant,genic_downstream_transcript_variant                                                           |
| rs1192233044 | intron_variant                                                                                               |
| rs1192291588 | intron_variant                                                                                               |
| rs1192295423 | genic_upstream_transcript_variant,intron_variant                                                             |
| rs1192350534 | intron_variant                                                                                               |
| rs1192367512 | non_coding_transcript_variant,coding_sequence_variant,frameshift_variant,genic_downstream_transcript_variant |
| rs1192411510 | genic_upstream_transcript_variant,intron_variant                                                             |
| rs1192457673 | genic_upstream_transcript_variant,intron_variant                                                             |
| rs1192473941 | intron_variant                                                                                               |
| rs1192501752 | intron_variant,genic_downstream_transcript_variant                                                           |
| rs1192531098 | genic_upstream_transcript_variant,intron_variant                                                             |
| rs1192547389 | intron_variant,genic_downstream_transcript_variant                                                           |
| rs1192551660 | genic_upstream_transcript_variant,intron_variant                                                             |
| rs1192572475 | intron_variant,genic_downstream_transcript_variant                                                           |
| rs1192576002 | genic_upstream_transcript_variant,intron_variant                                                             |
| rs1192601141 | genic_upstream_transcript_variant,intron_variant,upstream_transcript_variant,2KB_upstream_variant            |
| rs1192606771 | intron_variant                                                                                               |
| rs1192618097 | genic_upstream_transcript_variant,intron_variant                                                             |
| rs1192639240 | intron_variant                                                                                               |
| rs1192679835 | intron_variant,genic_downstream_transcript_variant                                                           |
| rs1192717671 | genic_upstream_transcript_variant,intron_variant                                                             |
| rs1192724270 | intron_variant                                                                                               |
| rs1192749887 | genic_upstream_transcript_variant,intron_variant                                                             |
| rs1192764854 | 500B_downstream_variant,downstream_transcript_variant                                                        |
| rs1192812083 | genic_upstream_transcript_variant,intron_variant                                                             |
| rs1192840592 | genic_upstream_transcript_variant,intron_variant                                                             |
| rs1192904318 | intron_variant,genic_downstream_transcript_variant                                                           |
| rs1192914888 | intron_variant                                                                                               |
| rs1192949955 | genic_upstream_transcript_variant,intron_variant                                                             |
| rs1192983002 | genic_upstream_transcript_variant,intron_variant,upstream_transcript_variant,2KB_upstream_variant            |
| rs1192989958 | intron_variant,genic_downstream_transcript_variant                                                           |
| rs1193003334 | intron_variant,genic_downstream_transcript_variant                                                           |
| rs1193007848 | genic_upstream_transcript_variant,intron_variant,upstream_transcript_variant,2KB_upstream_variant            |
| rs1193014160 | intron_variant,genic_downstream_transcript_variant                                                           |

|              |                                                                                                            |
|--------------|------------------------------------------------------------------------------------------------------------|
| rs1193039018 | genic_upstream_transcript_variant,intron_variant                                                           |
| rs1193040287 | intron_variant,genic_downstream_transcript_variant                                                         |
| rs1193129411 | genic_upstream_transcript_variant,intron_variant                                                           |
| rs1193138320 | intron_variant,genic_downstream_transcript_variant                                                         |
| rs1193153581 | genic_upstream_transcript_variant,intron_variant                                                           |
| rs1193158158 | genic_upstream_transcript_variant,intron_variant                                                           |
| rs1193187089 | intron_variant,genic_downstream_transcript_variant                                                         |
| rs1193267375 | genic_upstream_transcript_variant,intron_variant,5_prime_UTR_variant,non_coding_transcript_variant         |
| rs1193304569 | intron_variant,genic_downstream_transcript_variant                                                         |
| rs1193349558 | intron_variant                                                                                             |
| rs1193349886 | genic_upstream_transcript_variant,intron_variant,upstream_transcript_variant,2KB_upstream_variant          |
| rs1193360661 | genic_upstream_transcript_variant,intron_variant                                                           |
| rs1193365228 | genic_upstream_transcript_variant,intron_variant                                                           |
| rs1193393702 | genic_upstream_transcript_variant,intron_variant                                                           |
| rs1193395384 | intron_variant,genic_downstream_transcript_variant                                                         |
| rs1193416712 | intron_variant                                                                                             |
| rs1193437287 | genic_upstream_transcript_variant,intron_variant                                                           |
| rs1193477750 | intron_variant                                                                                             |
| rs1193482743 | intron_variant                                                                                             |
| rs1193509014 | intron_variant                                                                                             |
| rs1193534551 | genic_upstream_transcript_variant,intron_variant                                                           |
| rs1193542215 | non_coding_transcript_variant,missense_variant,coding_sequence_variant,genic_downstream_transcript_variant |
| rs1193546764 | intron_variant                                                                                             |
| rs1193612115 | intron_variant                                                                                             |
| rs1193621896 | genic_upstream_transcript_variant,intron_variant                                                           |
| rs1193625461 | intron_variant,genic_downstream_transcript_variant                                                         |
| rs1193628982 | genic_upstream_transcript_variant,intron_variant                                                           |
| rs1193630157 | intron_variant                                                                                             |
| rs1193634474 | intron_variant                                                                                             |
| rs1193679059 | genic_upstream_transcript_variant,intron_variant                                                           |
| rs1193685626 | intron_variant,genic_downstream_transcript_variant                                                         |
| rs1193687414 | genic_upstream_transcript_variant,intron_variant                                                           |
| rs1193700346 | intron_variant                                                                                             |
| rs1193734746 | intron_variant                                                                                             |
| rs1193737975 | genic_upstream_transcript_variant,intron_variant                                                           |
| rs1193747923 | genic_upstream_transcript_variant,intron_variant                                                           |
| rs1193748212 | intron_variant                                                                                             |
| rs1193777218 | intron_variant                                                                                             |
| rs1193822708 | genic_upstream_transcript_variant,intron_variant,upstream_transcript_variant                               |
| rs1193828928 | non_coding_transcript_variant,genic_downstream_transcript_variant,3_prime_UTR_variant                      |
| rs1193869366 | genic_upstream_transcript_variant,intron_variant                                                           |
| rs1193890866 | intron_variant,genic_downstream_transcript_variant                                                         |
| rs1193904596 | genic_upstream_transcript_variant,intron_variant                                                           |
| rs1193904916 | non_coding_transcript_variant,missense_variant,coding_sequence_variant,genic_downstream_transcript_variant |
| rs1193934282 | intron_variant,genic_downstream_transcript_variant                                                         |
| rs1193960073 | intron_variant                                                                                             |
| rs1193980038 | intron_variant                                                                                             |
| rs1193999836 | intron_variant,genic_downstream_transcript_variant                                                         |
| rs1194000273 | intron_variant,genic_downstream_transcript_variant                                                         |
| rs1194006543 | genic_upstream_transcript_variant,intron_variant                                                           |
| rs1194055017 | intron_variant,genic_downstream_transcript_variant                                                         |
| rs1194104749 | intron_variant                                                                                             |
| rs1194128558 | genic_upstream_transcript_variant,intron_variant                                                           |
| rs1194132634 | intron_variant                                                                                             |
| rs1194151800 | intron_variant,genic_downstream_transcript_variant                                                         |
| rs1194177006 | genic_upstream_transcript_variant,intron_variant                                                           |
| rs1194226239 | genic_upstream_transcript_variant,intron_variant                                                           |
| rs1194235444 | genic_upstream_transcript_variant,intron_variant                                                           |
| rs1194243308 | intron_variant                                                                                             |
| rs1194251734 | intron_variant,genic_downstream_transcript_variant                                                         |
| rs1194254943 | intron_variant,genic_downstream_transcript_variant                                                         |
| rs1194286952 | intron_variant,genic_downstream_transcript_variant                                                         |
| rs1194291417 | genic_upstream_transcript_variant,intron_variant                                                           |
| rs1194312782 | intron_variant                                                                                             |
| rs1194340293 | intron_variant,genic_downstream_transcript_variant                                                         |
| rs1194342773 | intron_variant                                                                                             |
| rs1194400079 | genic_upstream_transcript_variant,intron_variant                                                           |
| rs1194465754 | intron_variant,genic_downstream_transcript_variant                                                         |
| rs1194481505 | intron_variant                                                                                             |
| rs1194504438 | intron_variant,genic_downstream_transcript_variant                                                         |
| rs1194512343 | intron_variant,genic_downstream_transcript_variant                                                         |
| rs1194538892 | intron_variant,genic_downstream_transcript_variant                                                         |
| rs1194547373 | intron_variant                                                                                             |
| rs1194606703 | genic_upstream_transcript_variant,intron_variant                                                           |

|              |                                                                                                            |
|--------------|------------------------------------------------------------------------------------------------------------|
| rs1194620846 | genic_upstream_transcript_variant,intron_variant                                                           |
| rs1194630876 | intron_variant                                                                                             |
| rs1194709506 | intron_variant,genic_downstream_transcript_variant,downstream_transcript_variant                           |
| rs1194715008 | intron_variant                                                                                             |
| rs1194721704 | intron_variant                                                                                             |
| rs1194774036 | genic_upstream_transcript_variant,intron_variant                                                           |
| rs1194825719 | intron_variant                                                                                             |
| rs1194851948 | genic_upstream_transcript_variant,intron_variant,upstream_transcript_variant,2KB_upstream_variant          |
| rs1194860722 | genic_upstream_transcript_variant,intron_variant                                                           |
| rs1194930026 | intron_variant                                                                                             |
| rs1194949325 | intron_variant                                                                                             |
| rs1194949802 | genic_upstream_transcript_variant,intron_variant                                                           |
| rs1195000182 | genic_upstream_transcript_variant,intron_variant                                                           |
| rs1195092347 | intron_variant                                                                                             |
| rs1195103668 | genic_upstream_transcript_variant,intron_variant                                                           |
| rs1195146507 | genic_upstream_transcript_variant,intron_variant                                                           |
| rs1195186990 | intron_variant                                                                                             |
| rs1195218785 | genic_upstream_transcript_variant,intron_variant,upstream_transcript_variant                               |
| rs1195250265 | genic_upstream_transcript_variant,intron_variant                                                           |
| rs1195259259 | intron_variant                                                                                             |
| rs1195285784 | intron_variant                                                                                             |
| rs1195304926 | genic_upstream_transcript_variant,intron_variant,upstream_transcript_variant,2KB_upstream_variant          |
| rs1195330592 | genic_upstream_transcript_variant,intron_variant,upstream_transcript_variant,2KB_upstream_variant          |
| rs1195357465 | non_coding_transcript_variant,genic_downstream_transcript_variant,3_prime_UTR_variant                      |
| rs1195364667 | intron_variant                                                                                             |
| rs1195366434 | genic_upstream_transcript_variant,intron_variant                                                           |
| rs1195406147 | intron_variant,genic_downstream_transcript_variant                                                         |
| rs1195447344 | intron_variant                                                                                             |
| rs1195521453 | intron_variant                                                                                             |
| rs1195561194 | genic_upstream_transcript_variant,intron_variant,upstream_transcript_variant,2KB_upstream_variant          |
| rs1195612306 | genic_upstream_transcript_variant,intron_variant                                                           |
| rs1195621341 | genic_upstream_transcript_variant,intron_variant                                                           |
| rs1195649847 | genic_upstream_transcript_variant,intron_variant                                                           |
| rs1195725631 | genic_upstream_transcript_variant,intron_variant,upstream_transcript_variant,2KB_upstream_variant          |
| rs1195727512 | genic_upstream_transcript_variant,intron_variant                                                           |
| rs1195758666 | genic_upstream_transcript_variant,intron_variant                                                           |
| rs1195791926 | genic_upstream_transcript_variant,intron_variant,upstream_transcript_variant,2KB_upstream_variant          |
| rs1195806242 | intron_variant                                                                                             |
| rs1195819987 | genic_upstream_transcript_variant,intron_variant                                                           |
| rs1195856179 | intron_variant                                                                                             |
| rs1195866207 | genic_upstream_transcript_variant,intron_variant                                                           |
| rs1195889928 | intron_variant                                                                                             |
| rs1195925217 | intron_variant,genic_downstream_transcript_variant                                                         |
| rs1195955839 | genic_upstream_transcript_variant,intron_variant                                                           |
| rs1195959999 | genic_upstream_transcript_variant,intron_variant                                                           |
| rs1195995476 | non_coding_transcript_variant,genic_downstream_transcript_variant,3_prime_UTR_variant                      |
| rs1196006546 | genic_upstream_transcript_variant,intron_variant                                                           |
| rs1196017220 | intron_variant,genic_downstream_transcript_variant                                                         |
| rs1196049497 | genic_upstream_transcript_variant,intron_variant                                                           |
| rs1196054321 | genic_upstream_transcript_variant,intron_variant,upstream_transcript_variant                               |
| rs1196066128 | intron_variant                                                                                             |
| rs1196110884 | genic_upstream_transcript_variant,intron_variant,upstream_transcript_variant                               |
| rs1196119414 | intron_variant,genic_downstream_transcript_variant                                                         |
| rs1196132800 | intron_variant                                                                                             |
| rs1196138098 | intron_variant,genic_downstream_transcript_variant                                                         |
| rs1196149751 | genic_upstream_transcript_variant,intron_variant,5_prime_UTR_variant,non_coding_transcript_variant         |
| rs1196163495 | genic_upstream_transcript_variant,intron_variant,upstream_transcript_variant                               |
| rs1196165469 | intron_variant                                                                                             |
| rs1196168142 | non_coding_transcript_variant,missense_variant,coding_sequence_variant,genic_downstream_transcript_variant |
| rs1196169572 | genic_upstream_transcript_variant,intron_variant,upstream_transcript_variant,2KB_upstream_variant          |
| rs1196187276 | intron_variant                                                                                             |
| rs1196188378 | genic_upstream_transcript_variant,intron_variant                                                           |
| rs1196217305 | genic_downstream_transcript_variant,intron_variant                                                         |
| rs1196218927 | genic_upstream_transcript_variant,intron_variant                                                           |
| rs1196238382 | genic_upstream_transcript_variant,intron_variant                                                           |
| rs1196302670 | intron_variant                                                                                             |
| rs1196323009 | genic_downstream_transcript_variant,intron_variant                                                         |
| rs1196325488 | genic_upstream_transcript_variant,intron_variant                                                           |
| rs1196347819 | genic_upstream_transcript_variant,intron_variant                                                           |
| rs1196351061 | genic_downstream_transcript_variant,intron_variant                                                         |
| rs1196381520 | intron_variant                                                                                             |
| rs1196381704 | intron_variant                                                                                             |
| rs1196391249 | genic_upstream_transcript_variant,intron_variant                                                           |
| rs1196399036 | synonymous_variant,non_coding_transcript_variant,coding_sequence_variant                                   |

|              |                                                                                                                     |
|--------------|---------------------------------------------------------------------------------------------------------------------|
| rs1196440713 | intron_variant                                                                                                      |
| rs1196510883 | intron_variant                                                                                                      |
| rs1196516677 | intron_variant                                                                                                      |
| rs1196543273 | intron_variant,missense_variant,coding_sequence_variant                                                             |
| rs1196556720 | genic_upstream_transcript_variant,intron_variant                                                                    |
| rs1196567962 | genic_upstream_transcript_variant,2KB_upstream_variant,intron_variant,upstream_transcript_variant                   |
| rs1196581212 | intron_variant                                                                                                      |
| rs1196611711 | intron_variant                                                                                                      |
| rs1196622812 | intron_variant                                                                                                      |
| rs1196674795 | genic_downstream_transcript_variant,intron_variant                                                                  |
| rs1196676183 | intron_variant                                                                                                      |
| rs1196678036 | genic_upstream_transcript_variant,intron_variant                                                                    |
| rs1196726849 | intron_variant                                                                                                      |
| rs1196740251 | 3_prime_UTR_variant,genic_downstream_transcript_variant,non_coding_transcript_variant                               |
| rs1196754108 | intron_variant                                                                                                      |
| rs1196804729 | genic_upstream_transcript_variant,intron_variant                                                                    |
| rs1196809163 | genic_upstream_transcript_variant,intron_variant                                                                    |
| rs1196826445 | intron_variant                                                                                                      |
| rs1196837257 | intron_variant                                                                                                      |
| rs1196884309 | genic_upstream_transcript_variant,intron_variant                                                                    |
| rs1196895479 | genic_upstream_transcript_variant,intron_variant                                                                    |
| rs1196895647 | genic_upstream_transcript_variant,intron_variant                                                                    |
| rs1196922083 | genic_upstream_transcript_variant,intron_variant                                                                    |
| rs1196956233 | intron_variant                                                                                                      |
| rs1196960071 | intron_variant                                                                                                      |
| rs1197032056 | genic_downstream_transcript_variant,intron_variant                                                                  |
| rs1197063691 | genic_upstream_transcript_variant,2KB_upstream_variant,intron_variant,upstream_transcript_variant                   |
| rs1197081060 | genic_upstream_transcript_variant,intron_variant                                                                    |
| rs1197175970 | intron_variant                                                                                                      |
| rs1197190961 | genic_downstream_transcript_variant,intron_variant                                                                  |
| rs1197204514 | genic_upstream_transcript_variant,intron_variant                                                                    |
| rs1197207766 | genic_downstream_transcript_variant,missense_variant,non_coding_transcript_variant,coding_sequence_variant          |
| rs1197227100 | genic_upstream_transcript_variant,intron_variant                                                                    |
| rs1197296975 | intron_variant                                                                                                      |
| rs1197303180 | genic_downstream_transcript_variant,intron_variant                                                                  |
| rs1197308040 | genic_downstream_transcript_variant,intron_variant                                                                  |
| rs1197347647 | genic_upstream_transcript_variant,intron_variant                                                                    |
| rs1197371608 | genic_upstream_transcript_variant,intron_variant                                                                    |
| rs1197407327 | genic_downstream_transcript_variant,intron_variant,downstream_transcript_variant                                    |
| rs1197451596 | intron_variant                                                                                                      |
| rs1197465232 | intron_variant                                                                                                      |
| rs1197468171 | intron_variant                                                                                                      |
| rs1197527470 | genic_upstream_transcript_variant,intron_variant                                                                    |
| rs1197564531 | genic_upstream_transcript_variant,intron_variant                                                                    |
| rs1197609739 | genic_downstream_transcript_variant,intron_variant                                                                  |
| rs1197612327 | genic_downstream_transcript_variant,intron_variant                                                                  |
| rs1197647926 | genic_upstream_transcript_variant,intron_variant,upstream_transcript_variant,5_prime_UTR_variant                    |
| rs1197679254 | intron_variant                                                                                                      |
| rs1197734792 | intron_variant                                                                                                      |
| rs1197760361 | intron_variant                                                                                                      |
| rs1197771094 | genic_downstream_transcript_variant,intron_variant                                                                  |
| rs1197806118 | genic_upstream_transcript_variant,intron_variant                                                                    |
| rs1197875060 | genic_upstream_transcript_variant,intron_variant                                                                    |
| rs1197924272 | genic_downstream_transcript_variant,intron_variant,downstream_transcript_variant                                    |
| rs1197932364 | genic_downstream_transcript_variant,intron_variant                                                                  |
| rs1197950961 | intron_variant                                                                                                      |
| rs1197969978 | genic_upstream_transcript_variant,2KB_upstream_variant,intron_variant,upstream_transcript_variant                   |
| rs1197998795 | intron_variant                                                                                                      |
| rs1198024271 | genic_upstream_transcript_variant,intron_variant                                                                    |
| rs1198037711 | genic_upstream_transcript_variant,intron_variant,upstream_transcript_variant                                        |
| rs1198038217 | genic_downstream_transcript_variant,intron_variant,downstream_transcript_variant                                    |
| rs1198045160 | genic_upstream_transcript_variant,intron_variant                                                                    |
| rs1198139331 | genic_upstream_transcript_variant,intron_variant                                                                    |
| rs1198182203 | 3_prime_UTR_variant,genic_downstream_transcript_variant,downstream_transcript_variant,non_coding_transcript_variant |
| rs1198220547 | 500B_downstream_variant,downstream_transcript_variant                                                               |
| rs1198224832 | genic_downstream_transcript_variant,intron_variant                                                                  |
| rs1198231654 | genic_downstream_transcript_variant,intron_variant                                                                  |
| rs1198238475 | intron_variant                                                                                                      |
| rs1198246861 | genic_upstream_transcript_variant,intron_variant                                                                    |
| rs1198255084 | genic_upstream_transcript_variant,intron_variant                                                                    |
| rs1198259103 | genic_upstream_transcript_variant,intron_variant,upstream_transcript_variant                                        |
| rs1198280806 | intron_variant                                                                                                      |
| rs1198359690 | genic_upstream_transcript_variant,intron_variant                                                                    |
| rs1198414243 | genic_upstream_transcript_variant,intron_variant                                                                    |

|              |                                                                                                            |
|--------------|------------------------------------------------------------------------------------------------------------|
| rs1198446430 | intron_variant                                                                                             |
| rs1198470248 | intron_variant                                                                                             |
| rs1198473740 | genic_upstream_transcript_variant,intron_variant,upstream_transcript_variant                               |
| rs1198476899 | intron_variant                                                                                             |
| rs1198583456 | intron_variant                                                                                             |
| rs1198599842 | genic_upstream_transcript_variant,intron_variant                                                           |
| rs1198623523 | genic_upstream_transcript_variant,intron_variant                                                           |
| rs1198653975 | genic_downstream_transcript_variant,intron_variant                                                         |
| rs1198656512 | intron_variant                                                                                             |
| rs1198687410 | genic_upstream_transcript_variant,intron_variant                                                           |
| rs1198700958 | genic_upstream_transcript_variant,intron_variant,upstream_transcript_variant                               |
| rs1198719289 | genic_downstream_transcript_variant,intron_variant                                                         |
| rs1198741631 | genic_upstream_transcript_variant,intron_variant                                                           |
| rs1198767258 | genic_downstream_transcript_variant,intron_variant                                                         |
| rs1198768041 | genic_upstream_transcript_variant,intron_variant                                                           |
| rs1198780945 | 3_prime_UTR_variant,genic_downstream_transcript_variant,non_coding_transcript_variant                      |
| rs1198789002 | genic_upstream_transcript_variant,intron_variant,upstream_transcript_variant,5_prime_UTR_variant           |
| rs1198793925 | intron_variant                                                                                             |
| rs1198808105 | genic_upstream_transcript_variant,intron_variant                                                           |
| rs1198823208 | intron_variant                                                                                             |
| rs1198840037 | intron_variant                                                                                             |
| rs1198872722 | intron_variant                                                                                             |
| rs1198904741 | genic_upstream_transcript_variant,intron_variant                                                           |
| rs1198913524 | genic_upstream_transcript_variant,intron_variant                                                           |
| rs1198937338 | genic_downstream_transcript_variant,intron_variant                                                         |
| rs1198976464 | genic_upstream_transcript_variant,intron_variant                                                           |
| rs1199025915 | genic_upstream_transcript_variant,intron_variant                                                           |
| rs1199069315 | genic_upstream_transcript_variant,intron_variant                                                           |
| rs1199085979 | genic_downstream_transcript_variant,intron_variant                                                         |
| rs1199090063 | genic_downstream_transcript_variant,intron_variant                                                         |
| rs1199090098 | intron_variant                                                                                             |
| rs1199097857 | genic_downstream_transcript_variant,intron_variant                                                         |
| rs1199104872 | genic_upstream_transcript_variant,2KB_upstream_variant,intron_variant,upstream_transcript_variant          |
| rs1199164973 | genic_upstream_transcript_variant,intron_variant                                                           |
| rs1199249051 | genic_upstream_transcript_variant,intron_variant                                                           |
| rs1199252791 | genic_upstream_transcript_variant,2KB_upstream_variant,intron_variant,upstream_transcript_variant          |
| rs1199322178 | intron_variant                                                                                             |
| rs1199327890 | genic_upstream_transcript_variant,intron_variant                                                           |
| rs1199333382 | genic_downstream_transcript_variant,intron_variant                                                         |
| rs1199341480 | 3_prime_UTR_variant,genic_downstream_transcript_variant,non_coding_transcript_variant                      |
| rs1199356214 | genic_upstream_transcript_variant,intron_variant                                                           |
| rs1199417696 | intron_variant                                                                                             |
| rs1199433608 | genic_upstream_transcript_variant,intron_variant                                                           |
| rs1199440222 | genic_upstream_transcript_variant,intron_variant,upstream_transcript_variant                               |
| rs1199447864 | intron_variant                                                                                             |
| rs1199499357 | genic_downstream_transcript_variant,intron_variant                                                         |
| rs1199539113 | genic_downstream_transcript_variant,intron_variant                                                         |
| rs1199542261 | genic_upstream_transcript_variant,intron_variant                                                           |
| rs1199612436 | genic_downstream_transcript_variant,intron_variant                                                         |
| rs1199615955 | 3_prime_UTR_variant,genic_downstream_transcript_variant,non_coding_transcript_variant                      |
| rs1199620507 | intron_variant                                                                                             |
| rs1199644578 | genic_upstream_transcript_variant,intron_variant                                                           |
| rs1199686934 | intron_variant                                                                                             |
| rs1199706120 | intron_variant                                                                                             |
| rs1199723513 | genic_downstream_transcript_variant,missense_variant,non_coding_transcript_variant,coding_sequence_variant |
| rs1199757361 | genic_downstream_transcript_variant,intron_variant                                                         |
| rs1199757803 | intron_variant                                                                                             |
| rs1199781638 | genic_upstream_transcript_variant,intron_variant                                                           |
| rs1199798023 | intron_variant                                                                                             |
| rs1199814249 | intron_variant                                                                                             |
| rs1199836609 | intron_variant                                                                                             |
| rs1199870701 | intron_variant                                                                                             |
| rs1199898520 | intron_variant                                                                                             |
| rs1199925989 | genic_upstream_transcript_variant,intron_variant                                                           |
| rs1200005623 | intron_variant                                                                                             |
| rs1200067402 | genic_upstream_transcript_variant,intron_variant                                                           |
| rs1200077170 | intron_variant                                                                                             |
| rs1200077547 | genic_downstream_transcript_variant,intron_variant                                                         |
| rs1200134436 | intron_variant                                                                                             |
| rs1200175556 | intron_variant                                                                                             |
| rs1200178074 | genic_downstream_transcript_variant,intron_variant                                                         |
| rs1200192033 | genic_upstream_transcript_variant,intron_variant                                                           |
| rs1200204105 | genic_upstream_transcript_variant,intron_variant                                                           |
| rs1200229918 | genic_upstream_transcript_variant,intron_variant                                                           |

|              |                                                                                                                           |
|--------------|---------------------------------------------------------------------------------------------------------------------------|
| rs1200273632 | intron_variant                                                                                                            |
| rs1200283033 | 3_prime_UTR_variant,genetic_downstream_transcript_variant,non_coding_transcript_variant                                   |
| rs1200326893 | intron_variant                                                                                                            |
| rs1200347824 | genetic_upstream_transcript_variant,intron_variant                                                                        |
| rs1200409365 | intron_variant                                                                                                            |
| rs1200410468 | intron_variant                                                                                                            |
| rs1200423161 | missense_variant,non_coding_transcript_variant,genetic_upstream_transcript_variant,intron_variant,coding_sequence_variant |
| rs1200430980 | genetic_upstream_transcript_variant,intron_variant                                                                        |
| rs1200472808 | genetic_upstream_transcript_variant,intron_variant                                                                        |
| rs1200590288 | 3_prime_UTR_variant,genetic_downstream_transcript_variant,non_coding_transcript_variant                                   |
| rs1200681030 | genetic_upstream_transcript_variant,intron_variant,upstream_transcript_variant                                            |
| rs1200683299 | intron_variant                                                                                                            |
| rs1200713854 | genetic_downstream_transcript_variant,intron_variant                                                                      |
| rs1200716934 | intron_variant                                                                                                            |
| rs1200749425 | intron_variant                                                                                                            |
| rs1200759385 | genetic_downstream_transcript_variant,intron_variant                                                                      |
| rs1200763446 | genetic_downstream_transcript_variant,intron_variant                                                                      |
| rs1200808228 | genetic_downstream_transcript_variant,intron_variant                                                                      |
| rs1200845181 | genetic_upstream_transcript_variant,intron_variant                                                                        |
| rs1200898159 | intron_variant                                                                                                            |
| rs1200913489 | genetic_upstream_transcript_variant,intron_variant                                                                        |
| rs1200926886 | genetic_downstream_transcript_variant,intron_variant                                                                      |
| rs1200928416 | intron_variant                                                                                                            |
| rs1200935984 | intron_variant                                                                                                            |
| rs1200965661 | 3_prime_UTR_variant,genetic_downstream_transcript_variant,non_coding_transcript_variant                                   |
| rs1200987388 | intron_variant                                                                                                            |
| rs1200994299 | frameshift_variant,non_coding_transcript_variant,coding_sequence_variant                                                  |
| rs1200997897 | genetic_upstream_transcript_variant,intron_variant                                                                        |
| rs1201003869 | intron_variant                                                                                                            |
| rs1201004667 | intron_variant                                                                                                            |
| rs1201010637 | genetic_upstream_transcript_variant,2KB_upstream_variant,intron_variant,upstream_transcript_variant                       |
| rs1201032934 | genetic_upstream_transcript_variant,intron_variant                                                                        |
| rs1201094283 | genetic_upstream_transcript_variant,intron_variant                                                                        |
| rs1201130135 | genetic_upstream_transcript_variant,intron_variant                                                                        |
| rs1201200555 | genetic_upstream_transcript_variant,intron_variant                                                                        |
| rs1201226455 | genetic_upstream_transcript_variant,intron_variant                                                                        |
| rs1201239692 | genetic_upstream_transcript_variant,intron_variant                                                                        |
| rs1201276838 | genetic_upstream_transcript_variant,intron_variant                                                                        |
| rs1201279795 | intron_variant                                                                                                            |
| rs1201282511 | intron_variant                                                                                                            |
| rs1201282824 | genetic_downstream_transcript_variant,intron_variant                                                                      |
| rs1201332424 | intron_variant                                                                                                            |
| rs1201335023 | intron_variant                                                                                                            |
| rs1201337782 | intron_variant                                                                                                            |
| rs1201402460 | genetic_upstream_transcript_variant,intron_variant                                                                        |
| rs1201414304 | intron_variant                                                                                                            |
| rs1201415013 | intron_variant                                                                                                            |
| rs1201515303 | genetic_upstream_transcript_variant,intron_variant                                                                        |
| rs1201573173 | intron_variant                                                                                                            |
| rs1201598003 | stop_lost,intron_variant,terminator_codon_variant                                                                         |
| rs1201620008 | genetic_upstream_transcript_variant,intron_variant                                                                        |
| rs1201632993 | genetic_downstream_transcript_variant,intron_variant                                                                      |
| rs1201635852 | genetic_upstream_transcript_variant,intron_variant                                                                        |
| rs1201688647 | genetic_upstream_transcript_variant,intron_variant                                                                        |
| rs1201702333 | genetic_downstream_transcript_variant,intron_variant                                                                      |
| rs1201717315 | genetic_upstream_transcript_variant,intron_variant                                                                        |
| rs1201735189 | genetic_upstream_transcript_variant,intron_variant                                                                        |
| rs1201744431 | intron_variant                                                                                                            |
| rs1201747416 | genetic_downstream_transcript_variant,intron_variant                                                                      |
| rs1201764777 | genetic_upstream_transcript_variant,intron_variant                                                                        |
| rs1201771940 | genetic_downstream_transcript_variant,intron_variant,downstream_transcript_variant                                        |
| rs1201775842 | genetic_downstream_transcript_variant,intron_variant                                                                      |
| rs1201810654 | genetic_upstream_transcript_variant,intron_variant                                                                        |
| rs1201889385 | intron_variant                                                                                                            |
| rs1201907362 | genetic_upstream_transcript_variant,intron_variant                                                                        |
| rs1201911394 | intron_variant                                                                                                            |
| rs1201911964 | genetic_downstream_transcript_variant,intron_variant                                                                      |
| rs1201989602 | genetic_downstream_transcript_variant,missense_variant,non_coding_transcript_variant,coding_sequence_variant              |
| rs1202001389 | genetic_upstream_transcript_variant,intron_variant                                                                        |
| rs1202009195 | genetic_upstream_transcript_variant,intron_variant                                                                        |
| rs1202020424 | genetic_upstream_transcript_variant,intron_variant                                                                        |
| rs1202035096 | genetic_upstream_transcript_variant,intron_variant                                                                        |
| rs1202074208 | intron_variant                                                                                                            |
| rs1202112298 | genetic_upstream_transcript_variant,intron_variant                                                                        |

|              |                                                                                                                         |
|--------------|-------------------------------------------------------------------------------------------------------------------------|
| rs1202114321 | intron_variant                                                                                                          |
| rs1202147608 | genic_downstream_transcript_variant,intron_variant                                                                      |
| rs1202164246 | intron_variant                                                                                                          |
| rs1202185273 | genic_upstream_transcript_variant,intron_variant                                                                        |
| rs1202196416 | intron_variant                                                                                                          |
| rs1202205978 | intron_variant                                                                                                          |
| rs1202263102 | intron_variant                                                                                                          |
| rs1202270909 | intron_variant                                                                                                          |
| rs1202298146 | intron_variant                                                                                                          |
| rs1202326206 | genic_upstream_transcript_variant,intron_variant                                                                        |
| rs1202350959 | intron_variant                                                                                                          |
| rs1202351259 | intron_variant                                                                                                          |
| rs1202354861 | genic_upstream_transcript_variant,intron_variant                                                                        |
| rs1202406416 | genic_downstream_transcript_variant,intron_variant                                                                      |
| rs1202422467 | genic_upstream_transcript_variant,intron_variant                                                                        |
| rs1202452648 | intron_variant                                                                                                          |
| rs1202483224 | intron_variant                                                                                                          |
| rs1202502254 | intron_variant                                                                                                          |
| rs1202519074 | intron_variant                                                                                                          |
| rs1202524241 | intron_variant                                                                                                          |
| rs1202655454 | intron_variant                                                                                                          |
| rs1202688437 | genic_upstream_transcript_variant,intron_variant                                                                        |
| rs1202727430 | genic_downstream_transcript_variant,intron_variant                                                                      |
| rs1202744082 | genic_upstream_transcript_variant,intron_variant                                                                        |
| rs1202750189 | intron_variant                                                                                                          |
| rs1202759964 | intron_variant                                                                                                          |
| rs1202789345 | intron_variant                                                                                                          |
| rs1202794615 | genic_downstream_transcript_variant,intron_variant                                                                      |
| rs1202801453 | genic_upstream_transcript_variant,intron_variant                                                                        |
| rs1202802521 | genic_upstream_transcript_variant,intron_variant                                                                        |
| rs1202838081 | genic_upstream_transcript_variant,intron_variant                                                                        |
| rs1202887966 | intron_variant                                                                                                          |
| rs1202894637 | intron_variant                                                                                                          |
| rs1202932972 | genic_upstream_transcript_variant,intron_variant                                                                        |
| rs1202956897 | genic_downstream_transcript_variant,intron_variant                                                                      |
| rs1202957409 | intron_variant                                                                                                          |
| rs1202975894 | genic_upstream_transcript_variant,intron_variant                                                                        |
| rs1203025434 | genic_upstream_transcript_variant,intron_variant,upstream_transcript_variant                                            |
| rs1203028428 | genic_downstream_transcript_variant,intron_variant                                                                      |
| rs1203041185 | 3_prime_UTR_variant,genic_downstream_transcript_variant,non_coding_transcript_variant                                   |
| rs1203067406 | 500B_downstream_variant,downstream_transcript_variant                                                                   |
| rs1203086695 | genic_upstream_transcript_variant,intron_variant                                                                        |
| rs1203093337 | genic_downstream_transcript_variant,intron_variant                                                                      |
| rs1203117590 | intron_variant                                                                                                          |
| rs1203162796 | genic_upstream_transcript_variant,2KB_upstream_variant,intron_variant,upstream_transcript_variant                       |
| rs1203165307 | genic_downstream_transcript_variant,intron_variant                                                                      |
| rs1203175913 | genic_upstream_transcript_variant,intron_variant                                                                        |
| rs1203209935 | intron_variant                                                                                                          |
| rs1203246387 | genic_upstream_transcript_variant,intron_variant                                                                        |
| rs1203250277 | intron_variant                                                                                                          |
| rs1203271681 | intron_variant                                                                                                          |
| rs1203330972 | genic_upstream_transcript_variant,intron_variant                                                                        |
| rs1203331281 | intron_variant                                                                                                          |
| rs1203345372 | genic_downstream_transcript_variant,intron_variant                                                                      |
| rs1203386342 | genic_upstream_transcript_variant,intron_variant                                                                        |
| rs1203392526 | intron_variant                                                                                                          |
| rs1203398258 | genic_upstream_transcript_variant,intron_variant                                                                        |
| rs1203410917 | missense_variant,non_coding_transcript_variant,genic_upstream_transcript_variant,intron_variant,coding_sequence_variant |
| rs1203460996 | genic_upstream_transcript_variant,intron_variant                                                                        |
| rs1203461624 | genic_downstream_transcript_variant,intron_variant                                                                      |
| rs1203469981 | intron_variant,missense_variant,coding_sequence_variant                                                                 |
| rs1203476400 | missense_variant,non_coding_transcript_variant,genic_upstream_transcript_variant,intron_variant,coding_sequence_variant |
| rs1203500976 | intron_variant                                                                                                          |
| rs1203522613 | intron_variant                                                                                                          |
| rs1203554387 | intron_variant                                                                                                          |
| rs1203589394 | genic_upstream_transcript_variant,intron_variant                                                                        |
| rs1203592713 | intron_variant                                                                                                          |
| rs1203593225 | genic_downstream_transcript_variant,intron_variant                                                                      |
| rs1203609401 | genic_upstream_transcript_variant,intron_variant                                                                        |
| rs1203610182 | genic_downstream_transcript_variant,missense_variant,non_coding_transcript_variant,coding_sequence_variant              |
| rs1203616054 | genic_upstream_transcript_variant,intron_variant                                                                        |
| rs1203616586 | genic_downstream_transcript_variant,intron_variant                                                                      |
| rs1203634586 | 3_prime_UTR_variant,genic_downstream_transcript_variant,non_coding_transcript_variant                                   |
| rs1203635437 | genic_upstream_transcript_variant,intron_variant                                                                        |

|              |                                                                                                            |
|--------------|------------------------------------------------------------------------------------------------------------|
| rs1203646458 | intron_variant                                                                                             |
| rs1203663703 | genic_downstream_transcript_variant,intron_variant                                                         |
| rs1203671676 | genic_downstream_transcript_variant,intron_variant                                                         |
| rs1203700462 | genic_downstream_transcript_variant,intron_variant                                                         |
| rs1203709326 | intron_variant                                                                                             |
| rs1203711097 | intron_variant                                                                                             |
| rs1203760423 | intron_variant                                                                                             |
| rs1203763140 | intron_variant                                                                                             |
| rs1203775666 | intron_variant                                                                                             |
| rs1203803458 | intron_variant                                                                                             |
| rs1203922784 | genic_downstream_transcript_variant,intron_variant                                                         |
| rs1203950919 | intron_variant                                                                                             |
| rs1203983199 | genic_downstream_transcript_variant,intron_variant                                                         |
| rs1203996501 | intron_variant                                                                                             |
| rs1204007272 | genic_upstream_transcript_variant,intron_variant                                                           |
| rs1204008241 | intron_variant                                                                                             |
| rs1204121216 | intron_variant                                                                                             |
| rs1204145623 | intron_variant                                                                                             |
| rs1204151443 | genic_upstream_transcript_variant,intron_variant                                                           |
| rs1204248942 | genic_upstream_transcript_variant,intron_variant                                                           |
| rs1204305969 | genic_downstream_transcript_variant,intron_variant                                                         |
| rs1204343680 | genic_upstream_transcript_variant,intron_variant                                                           |
| rs1204369989 | genic_upstream_transcript_variant,intron_variant                                                           |
| rs1204386242 | genic_upstream_transcript_variant,intron_variant                                                           |
| rs1204394272 | intron_variant                                                                                             |
| rs1204449001 | intron_variant                                                                                             |
| rs1204449979 | genic_upstream_transcript_variant,intron_variant                                                           |
| rs1204461579 | intron_variant                                                                                             |
| rs1204472220 | genic_downstream_transcript_variant,missense_variant,non_coding_transcript_variant,coding_sequence_variant |
| rs1204499611 | intron_variant                                                                                             |
| rs1204507428 | genic_upstream_transcript_variant,intron_variant                                                           |
| rs1204560446 | intron_variant                                                                                             |
| rs1204581312 | genic_downstream_transcript_variant,intron_variant                                                         |
| rs1204604476 | genic_upstream_transcript_variant,intron_variant                                                           |
| rs1204608351 | intron_variant                                                                                             |
| rs1204617931 | genic_upstream_transcript_variant,intron_variant                                                           |
| rs1204643629 | intron_variant                                                                                             |
| rs1204656590 | genic_downstream_transcript_variant,intron_variant                                                         |
| rs1204681687 | genic_downstream_transcript_variant,intron_variant                                                         |
| rs1204706635 | intron_variant                                                                                             |
| rs1204728771 | missense_variant,non_coding_transcript_variant,coding_sequence_variant                                     |
| rs1204731573 | genic_upstream_transcript_variant,intron_variant                                                           |
| rs1204874658 | intron_variant                                                                                             |
| rs1204914840 | genic_upstream_transcript_variant,intron_variant                                                           |
| rs1204969842 | genic_upstream_transcript_variant,intron_variant                                                           |
| rs1204974833 | genic_downstream_transcript_variant,intron_variant                                                         |
| rs1205026700 | genic_upstream_transcript_variant,intron_variant                                                           |
| rs1205031728 | genic_downstream_transcript_variant,intron_variant                                                         |
| rs1205043948 | genic_downstream_transcript_variant,intron_variant                                                         |
| rs1205063845 | intron_variant                                                                                             |
| rs1205077210 | genic_upstream_transcript_variant,intron_variant                                                           |
| rs1205095378 | intron_variant                                                                                             |
| rs1205098866 | genic_upstream_transcript_variant,intron_variant                                                           |
| rs1205151807 | intron_variant                                                                                             |
| rs1205154151 | intron_variant                                                                                             |
| rs1205180082 | intron_variant                                                                                             |
| rs1205183327 | genic_upstream_transcript_variant,intron_variant                                                           |
| rs1205186994 | genic_downstream_transcript_variant,intron_variant                                                         |
| rs1205253882 | genic_upstream_transcript_variant,intron_variant                                                           |
| rs1205286105 | intron_variant                                                                                             |
| rs1205329178 | genic_upstream_transcript_variant,intron_variant                                                           |
| rs1205370103 | intron_variant                                                                                             |
| rs1205386628 | genic_upstream_transcript_variant,intron_variant                                                           |
| rs1205394229 | genic_upstream_transcript_variant,intron_variant                                                           |
| rs1205484398 | genic_upstream_transcript_variant,intron_variant                                                           |
| rs1205490084 | genic_downstream_transcript_variant,intron_variant                                                         |
| rs1205512929 | genic_downstream_transcript_variant,intron_variant                                                         |
| rs1205514582 | intron_variant                                                                                             |
| rs1205533270 | intron_variant                                                                                             |
| rs1205587236 | intron_variant                                                                                             |
| rs1205599999 | intron_variant                                                                                             |
| rs1205604402 | intron_variant                                                                                             |
| rs1205620651 | genic_downstream_transcript_variant,intron_variant                                                         |
| rs1205625016 | intron_variant                                                                                             |

|              |                                                                                       |
|--------------|---------------------------------------------------------------------------------------|
| rs1205661199 | genic_upstream_transcript_variant,intron_variant                                      |
| rs1205685589 | genic_downstream_transcript_variant,intron_variant                                    |
| rs1205693447 | intron_variant                                                                        |
| rs1205720857 | genic_upstream_transcript_variant,intron_variant                                      |
| rs1205731011 | genic_upstream_transcript_variant,intron_variant                                      |
| rs1205768235 | intron_variant                                                                        |
| rs1205812208 | genic_upstream_transcript_variant,intron_variant                                      |
| rs1205822468 | genic_upstream_transcript_variant,intron_variant                                      |
| rs1205823537 | intron_variant                                                                        |
| rs1205880919 | intron_variant                                                                        |
| rs1205947635 | intron_variant                                                                        |
| rs1205951070 | intron_variant                                                                        |
| rs1206008008 | intron_variant                                                                        |
| rs1206012846 | intron_variant                                                                        |
| rs1206014127 | intron_variant                                                                        |
| rs1206015285 | 3_prime_UTR_variant,genic_downstream_transcript_variant,non_coding_transcript_variant |
| rs1206017189 | genic_downstream_transcript_variant,intron_variant                                    |
| rs1206025453 | intron_variant                                                                        |
| rs1206037023 | intron_variant                                                                        |
| rs1206070562 | intron_variant                                                                        |
| rs1206110829 | genic_upstream_transcript_variant,intron_variant                                      |
| rs1206175065 | intron_variant                                                                        |
| rs1206177202 | intron_variant                                                                        |
| rs1206219649 | genic_upstream_transcript_variant,intron_variant                                      |
| rs1206254695 | genic_upstream_transcript_variant,intron_variant                                      |
| rs1206276045 | genic_upstream_transcript_variant,intron_variant                                      |
| rs1206286841 | genic_upstream_transcript_variant,intron_variant                                      |
| rs1206305486 | genic_upstream_transcript_variant,intron_variant                                      |
| rs1206306034 | genic_downstream_transcript_variant,intron_variant                                    |
| rs1206324743 | genic_upstream_transcript_variant,intron_variant                                      |
| rs1206389388 | genic_downstream_transcript_variant,intron_variant                                    |
| rs1206444130 | intron_variant                                                                        |
| rs1206476409 | intron_variant                                                                        |
| rs1206531099 | intron_variant                                                                        |
| rs1206540495 | genic_upstream_transcript_variant,intron_variant                                      |
| rs1206542386 | genic_upstream_transcript_variant,intron_variant                                      |
| rs1206554517 | genic_upstream_transcript_variant,intron_variant                                      |
| rs1206592835 | genic_upstream_transcript_variant,intron_variant,upstream_transcript_variant          |
| rs1206633371 | intron_variant                                                                        |
| rs1206633447 | intron_variant                                                                        |
| rs1206650139 | genic_downstream_transcript_variant,intron_variant                                    |
| rs1206691932 | intron_variant                                                                        |
| rs1206822415 | genic_upstream_transcript_variant,intron_variant                                      |
| rs1206826015 | genic_upstream_transcript_variant,intron_variant                                      |
| rs1206834725 | genic_upstream_transcript_variant,intron_variant,upstream_transcript_variant          |
| rs1206871139 | genic_upstream_transcript_variant,intron_variant                                      |
| rs1206893882 | genic_upstream_transcript_variant,intron_variant                                      |
| rs1206930645 | genic_downstream_transcript_variant,intron_variant                                    |
| rs1206941415 | genic_downstream_transcript_variant,intron_variant                                    |
| rs1207008573 | intron_variant,5_prime_UTR_variant                                                    |
| rs1207014634 | genic_downstream_transcript_variant,intron_variant                                    |
| rs1207145111 | genic_downstream_transcript_variant,intron_variant                                    |
| rs1207180536 | genic_upstream_transcript_variant,intron_variant                                      |
| rs1207197546 | genic_upstream_transcript_variant,intron_variant                                      |
| rs1207259682 | genic_upstream_transcript_variant,intron_variant                                      |
| rs1207261309 | genic_upstream_transcript_variant,intron_variant                                      |
| rs1207285150 | genic_upstream_transcript_variant,intron_variant                                      |
| rs1207327782 | intron_variant                                                                        |
| rs1207338822 | intron_variant                                                                        |
| rs1207346693 | genic_downstream_transcript_variant,intron_variant                                    |
| rs1207377119 | genic_downstream_transcript_variant,intron_variant                                    |
| rs1207446597 | genic_upstream_transcript_variant,intron_variant                                      |
| rs1207473531 | genic_upstream_transcript_variant,intron_variant                                      |
| rs1207523555 | genic_upstream_transcript_variant,intron_variant                                      |
| rs1207571615 | genic_upstream_transcript_variant,intron_variant                                      |
| rs1207585132 | intron_variant                                                                        |
| rs1207632648 | genic_upstream_transcript_variant,intron_variant                                      |
| rs1207633659 | intron_variant                                                                        |
| rs1207634832 | genic_downstream_transcript_variant,intron_variant                                    |
| rs1207672264 | intron_variant                                                                        |
| rs1207673037 | genic_upstream_transcript_variant,intron_variant                                      |
| rs1207698595 | genic_upstream_transcript_variant,intron_variant                                      |
| rs1207715563 | missense_variant,non_coding_transcript_variant,coding_sequence_variant                |
| rs1207721175 | intron_variant                                                                        |

|              |                                                                                                              |
|--------------|--------------------------------------------------------------------------------------------------------------|
| rs1207763636 | genic_upstream_transcript_variant,intron_variant                                                             |
| rs1207766075 | genic_upstream_transcript_variant,intron_variant                                                             |
| rs1207781386 | intron_variant                                                                                               |
| rs1207857178 | intron_variant                                                                                               |
| rs1207890929 | genic_upstream_transcript_variant,intron_variant                                                             |
| rs1207918474 | genic_upstream_transcript_variant,intron_variant                                                             |
| rs1207954497 | intron_variant                                                                                               |
| rs1207984877 | genic_upstream_transcript_variant,intron_variant                                                             |
| rs1208004319 | intron_variant                                                                                               |
| rs1208009683 | genic_upstream_transcript_variant,intron_variant                                                             |
| rs1208036798 | intron_variant                                                                                               |
| rs1208043070 | genic_upstream_transcript_variant,intron_variant                                                             |
| rs1208069537 | genic_upstream_transcript_variant,intron_variant                                                             |
| rs1208081371 | intron_variant                                                                                               |
| rs1208085344 | genic_upstream_transcript_variant,intron_variant                                                             |
| rs1208096025 | intron_variant,5_prime_UTR_variant                                                                           |
| rs1208134252 | genic_upstream_transcript_variant,intron_variant                                                             |
| rs1208168478 | genic_upstream_transcript_variant,intron_variant                                                             |
| rs1208196359 | intron_variant                                                                                               |
| rs1208201073 | genic_downstream_transcript_variant,intron_variant                                                           |
| rs1208214985 | intron_variant                                                                                               |
| rs1208260703 | genic_upstream_transcript_variant,intron_variant                                                             |
| rs1208272553 | genic_upstream_transcript_variant,intron_variant                                                             |
| rs1208284007 | genic_upstream_transcript_variant,intron_variant,upstream_transcript_variant                                 |
| rs1208332434 | intron_variant                                                                                               |
| rs1208419577 | intron_variant                                                                                               |
| rs1208436687 | genic_upstream_transcript_variant,intron_variant                                                             |
| rs1208439651 | intron_variant                                                                                               |
| rs1208449243 | intron_variant                                                                                               |
| rs1208457980 | genic_upstream_transcript_variant,intron_variant                                                             |
| rs1208537624 | intron_variant                                                                                               |
| rs1208554913 | genic_downstream_transcript_variant,synonymous_variant,non_coding_transcript_variant,coding_sequence_variant |
| rs1208561175 | intron_variant                                                                                               |
| rs1208561495 | genic_upstream_transcript_variant,intron_variant                                                             |
| rs1208605975 | intron_variant                                                                                               |
| rs1208665247 | intron_variant                                                                                               |
| rs1208695083 | genic_downstream_transcript_variant,intron_variant                                                           |
| rs1208757432 | genic_downstream_transcript_variant,intron_variant                                                           |
| rs1208758704 | genic_downstream_transcript_variant,intron_variant                                                           |
| rs1208779807 | intron_variant                                                                                               |
| rs1208808330 | genic_upstream_transcript_variant,intron_variant                                                             |
| rs1208818911 | genic_upstream_transcript_variant,intron_variant                                                             |
| rs1208830118 | genic_upstream_transcript_variant,intron_variant                                                             |
| rs1208853386 | genic_upstream_transcript_variant,intron_variant                                                             |
| rs1208861264 | genic_downstream_transcript_variant,intron_variant                                                           |
| rs1208881531 | non_coding_transcript_variant,coding_sequence_variant,missense_variant                                       |
| rs1208889143 | intron_variant                                                                                               |
| rs1208896661 | intron_variant                                                                                               |
| rs1208908752 | genic_downstream_transcript_variant,intron_variant                                                           |
| rs1208995664 | genic_upstream_transcript_variant,upstream_transcript_variant,2KB_upstream_variant,intron_variant            |
| rs1209003689 | genic_downstream_transcript_variant,intron_variant                                                           |
| rs1209063164 | genic_upstream_transcript_variant,intron_variant                                                             |
| rs1209108640 | genic_upstream_transcript_variant,intron_variant                                                             |
| rs1209117351 | genic_upstream_transcript_variant,intron_variant                                                             |
| rs1209123853 | genic_upstream_transcript_variant,intron_variant                                                             |
| rs1209150356 | intron_variant                                                                                               |
| rs1209151497 | genic_upstream_transcript_variant,intron_variant                                                             |
| rs1209152972 | genic_downstream_transcript_variant,intron_variant                                                           |
| rs1209154203 | intron_variant                                                                                               |
| rs1209170944 | genic_upstream_transcript_variant,intron_variant                                                             |
| rs1209189614 | 2KB_upstream_variant,upstream_transcript_variant,genic_upstream_transcript_variant,intron_variant            |
| rs1209204260 | genic_upstream_transcript_variant,intron_variant                                                             |
| rs1209208843 | genic_downstream_transcript_variant,intron_variant                                                           |
| rs1209209305 | genic_downstream_transcript_variant,intron_variant                                                           |
| rs1209245083 | genic_downstream_transcript_variant,intron_variant                                                           |
| rs1209259949 | intron_variant                                                                                               |
| rs1209266849 | genic_upstream_transcript_variant,intron_variant                                                             |
| rs1209387556 | upstream_transcript_variant,genic_upstream_transcript_variant,intron_variant                                 |
| rs1209412899 | intron_variant                                                                                               |
| rs1209429198 | genic_upstream_transcript_variant,intron_variant                                                             |
| rs1209477355 | intron_variant                                                                                               |
| rs1209502038 | downstream_transcript_variant,500B_downstream_variant                                                        |
| rs1209527272 | genic_upstream_transcript_variant,intron_variant                                                             |
| rs1209537403 | genic_upstream_transcript_variant,intron_variant                                                             |

|              |                                                                                                   |
|--------------|---------------------------------------------------------------------------------------------------|
| rs1209586598 | genic_downstream_transcript_variant,non_coding_transcript_variant,3_prime_UTR_variant             |
| rs1209593152 | genic_downstream_transcript_variant,intron_variant                                                |
| rs1209676950 | intron_variant                                                                                    |
| rs1209690432 | intron_variant                                                                                    |
| rs1209717213 | intron_variant                                                                                    |
| rs1209725856 | genic_upstream_transcript_variant,intron_variant                                                  |
| rs1209780574 | genic_upstream_transcript_variant,intron_variant                                                  |
| rs1209786998 | intron_variant                                                                                    |
| rs1209816075 | genic_upstream_transcript_variant,intron_variant                                                  |
| rs1209856153 | genic_upstream_transcript_variant,intron_variant                                                  |
| rs1209871985 | genic_upstream_transcript_variant,intron_variant                                                  |
| rs1209876782 | intron_variant                                                                                    |
| rs1209894072 | upstream_transcript_variant,genic_upstream_transcript_variant,intron_variant                      |
| rs1209924245 | genic_upstream_transcript_variant,intron_variant                                                  |
| rs1209937129 | genic_downstream_transcript_variant,non_coding_transcript_variant,3_prime_UTR_variant             |
| rs1209948347 | genic_upstream_transcript_variant,intron_variant                                                  |
| rs1209958299 | intron_variant                                                                                    |
| rs1209964980 | intron_variant                                                                                    |
| rs1210002767 | genic_upstream_transcript_variant,intron_variant                                                  |
| rs1210025765 | genic_upstream_transcript_variant,intron_variant                                                  |
| rs1210058129 | genic_downstream_transcript_variant,intron_variant                                                |
| rs1210080595 | genic_upstream_transcript_variant,upstream_transcript_variant,2KB_upstream_variant,intron_variant |
| rs1210082700 | genic_upstream_transcript_variant,intron_variant                                                  |
| rs1210094777 | genic_downstream_transcript_variant,intron_variant                                                |
| rs1210116420 | genic_upstream_transcript_variant,intron_variant                                                  |
| rs1210161335 | upstream_transcript_variant,genic_upstream_transcript_variant,intron_variant                      |
| rs1210179390 | intron_variant                                                                                    |
| rs1210193238 | intron_variant                                                                                    |
| rs1210196447 | genic_upstream_transcript_variant,intron_variant                                                  |
| rs1210329889 | genic_upstream_transcript_variant,intron_variant                                                  |
| rs1210331350 | genic_upstream_transcript_variant,intron_variant                                                  |
| rs1210332315 | upstream_transcript_variant,genic_upstream_transcript_variant,5_prime_UTR_variant,intron_variant  |
| rs1210334373 | genic_upstream_transcript_variant,upstream_transcript_variant,2KB_upstream_variant,intron_variant |
| rs1210366998 | genic_upstream_transcript_variant,intron_variant                                                  |
| rs1210431619 | genic_downstream_transcript_variant,intron_variant                                                |
| rs1210442457 | genic_upstream_transcript_variant,intron_variant                                                  |
| rs1210453691 | intron_variant                                                                                    |
| rs1210485570 | genic_upstream_transcript_variant,intron_variant                                                  |
| rs1210525291 | intron_variant                                                                                    |
| rs1210532772 | intron_variant                                                                                    |
| rs1210548139 | intron_variant                                                                                    |
| rs1210548788 | genic_upstream_transcript_variant,intron_variant                                                  |
| rs1210591533 | intron_variant                                                                                    |
| rs1210602767 | intron_variant                                                                                    |
| rs1210632005 | intron_variant                                                                                    |
| rs1210643427 | genic_upstream_transcript_variant,intron_variant                                                  |
| rs1210678192 | genic_upstream_transcript_variant,intron_variant                                                  |
| rs1210681259 | intron_variant                                                                                    |
| rs1210682948 | genic_upstream_transcript_variant,intron_variant                                                  |
| rs1210747178 | genic_downstream_transcript_variant,intron_variant                                                |
| rs1210765179 | genic_upstream_transcript_variant,intron_variant                                                  |
| rs1210778783 | genic_upstream_transcript_variant,intron_variant                                                  |
| rs1210826383 | genic_upstream_transcript_variant,intron_variant                                                  |
| rs1210829440 | genic_downstream_transcript_variant,intron_variant                                                |
| rs1210834839 | genic_upstream_transcript_variant,intron_variant                                                  |
| rs1210891084 | intron_variant                                                                                    |
| rs1210932614 | genic_upstream_transcript_variant,intron_variant                                                  |
| rs1210969120 | upstream_transcript_variant,genic_upstream_transcript_variant,intron_variant                      |
| rs1210977485 | genic_downstream_transcript_variant,non_coding_transcript_variant,3_prime_UTR_variant             |
| rs1210982553 | intron_variant                                                                                    |
| rs1210999585 | 5_prime_UTR_variant,intron_variant                                                                |
| rs1211000491 | genic_upstream_transcript_variant,upstream_transcript_variant,2KB_upstream_variant,intron_variant |
| rs1211023131 | genic_upstream_transcript_variant,intron_variant                                                  |
| rs1211031341 | genic_downstream_transcript_variant,intron_variant                                                |
| rs1211040959 | genic_upstream_transcript_variant,intron_variant                                                  |
| rs1211050455 | intron_variant                                                                                    |
| rs1211077639 | genic_downstream_transcript_variant,intron_variant                                                |
| rs1211097680 | intron_variant                                                                                    |
| rs1211118607 | intron_variant                                                                                    |
| rs1211174938 | genic_upstream_transcript_variant,intron_variant                                                  |
| rs1211190351 | genic_upstream_transcript_variant,intron_variant                                                  |
| rs1211247302 | genic_upstream_transcript_variant,intron_variant                                                  |
| rs1211286578 | intron_variant                                                                                    |
| rs1211316338 | genic_upstream_transcript_variant,intron_variant                                                  |

|              |                                                                                                   |
|--------------|---------------------------------------------------------------------------------------------------|
| rs1211335106 | genic_downstream_transcript_variant,intron_variant                                                |
| rs1211366871 | genic_upstream_transcript_variant,intron_variant                                                  |
| rs1211377109 | genic_upstream_transcript_variant,intron_variant                                                  |
| rs1211391891 | intron_variant                                                                                    |
| rs1211401785 | 2KB_upstream_variant,upstream_transcript_variant,genic_upstream_transcript_variant,intron_variant |
| rs1211426360 | intron_variant                                                                                    |
| rs1211429498 | intron_variant                                                                                    |
| rs1211466502 | upstream_transcript_variant,genic_upstream_transcript_variant,intron_variant                      |
| rs1211517175 | genic_upstream_transcript_variant,intron_variant                                                  |
| rs1211521585 | intron_variant                                                                                    |
| rs1211582818 | genic_upstream_transcript_variant,intron_variant                                                  |
| rs1211634426 | genic_upstream_transcript_variant,intron_variant                                                  |
| rs1211639393 | genic_downstream_transcript_variant,non_coding_transcript_variant,3_prime_UTR_variant             |
| rs1211657383 | genic_upstream_transcript_variant,intron_variant                                                  |
| rs1211731923 | genic_upstream_transcript_variant,intron_variant                                                  |
| rs1211740492 | genic_downstream_transcript_variant,intron_variant                                                |
| rs1211753124 | genic_downstream_transcript_variant,intron_variant                                                |
| rs1211759210 | intron_variant                                                                                    |
| rs1211761117 | genic_upstream_transcript_variant,intron_variant                                                  |
| rs1211769235 | genic_upstream_transcript_variant,intron_variant                                                  |
| rs1211776065 | 2KB_upstream_variant,upstream_transcript_variant,genic_upstream_transcript_variant,intron_variant |
| rs1211843066 | genic_upstream_transcript_variant,intron_variant                                                  |
| rs1211857489 | genic_upstream_transcript_variant,intron_variant                                                  |
| rs1211880808 | intron_variant                                                                                    |
| rs1211894369 | genic_upstream_transcript_variant,intron_variant                                                  |
| rs1211916104 | genic_downstream_transcript_variant,intron_variant                                                |
| rs1211919519 | 2KB_upstream_variant,upstream_transcript_variant,genic_upstream_transcript_variant,intron_variant |
| rs1211938992 | intron_variant                                                                                    |
| rs1211978382 | genic_upstream_transcript_variant,intron_variant                                                  |
| rs1212007539 | genic_upstream_transcript_variant,intron_variant                                                  |
| rs1212017798 | intron_variant                                                                                    |
| rs1212030329 | intron_variant                                                                                    |
| rs1212067371 | genic_upstream_transcript_variant,intron_variant                                                  |
| rs1212088892 | genic_upstream_transcript_variant,intron_variant                                                  |
| rs1212131316 | genic_upstream_transcript_variant,intron_variant                                                  |
| rs1212160399 | genic_upstream_transcript_variant,intron_variant                                                  |
| rs1212161024 | intron_variant                                                                                    |
| rs1212170699 | intron_variant                                                                                    |
| rs1212264775 | genic_upstream_transcript_variant,intron_variant                                                  |
| rs1212278437 | intron_variant                                                                                    |
| rs1212300955 | intron_variant                                                                                    |
| rs1212331896 | genic_upstream_transcript_variant,intron_variant                                                  |
| rs1212332214 | genic_upstream_transcript_variant,intron_variant                                                  |
| rs1212353759 | genic_upstream_transcript_variant,intron_variant                                                  |
| rs1212367251 | intron_variant                                                                                    |
| rs1212404012 | genic_upstream_transcript_variant,intron_variant                                                  |
| rs1212432376 | genic_downstream_transcript_variant,intron_variant                                                |
| rs1212444700 | genic_downstream_transcript_variant,intron_variant                                                |
| rs1212524160 | genic_upstream_transcript_variant,intron_variant                                                  |
| rs1212623836 | genic_upstream_transcript_variant,intron_variant                                                  |
| rs1212626518 | genic_upstream_transcript_variant,intron_variant                                                  |
| rs1212678632 | genic_downstream_transcript_variant,intron_variant                                                |
| rs1212712705 | genic_upstream_transcript_variant,intron_variant                                                  |
| rs1212713407 | genic_upstream_transcript_variant,intron_variant                                                  |
| rs1212737241 | genic_downstream_transcript_variant,intron_variant                                                |
| rs1212758299 | genic_upstream_transcript_variant,intron_variant                                                  |
| rs1212794811 | intron_variant                                                                                    |
| rs1212829355 | genic_upstream_transcript_variant,intron_variant                                                  |
| rs1212858866 | genic_downstream_transcript_variant,non_coding_transcript_variant,3_prime_UTR_variant             |
| rs1212916439 | genic_downstream_transcript_variant,intron_variant                                                |
| rs1212950991 | genic_downstream_transcript_variant,non_coding_transcript_variant,3_prime_UTR_variant             |
| rs1212952877 | genic_upstream_transcript_variant,intron_variant                                                  |
| rs1212972544 | intron_variant                                                                                    |
| rs1212996109 | genic_upstream_transcript_variant,intron_variant                                                  |
| rs1213012774 | genic_upstream_transcript_variant,intron_variant                                                  |
| rs1213126000 | genic_upstream_transcript_variant,intron_variant                                                  |
| rs1213136041 | intron_variant                                                                                    |
| rs1213147990 | genic_upstream_transcript_variant,intron_variant                                                  |
| rs1213148790 | intron_variant                                                                                    |
| rs1213161026 | genic_upstream_transcript_variant,intron_variant                                                  |
| rs1213225485 | genic_upstream_transcript_variant,intron_variant                                                  |
| rs1213241942 | genic_upstream_transcript_variant,intron_variant                                                  |
| rs1213285514 | genic_upstream_transcript_variant,intron_variant                                                  |
| rs1213295164 | genic_downstream_transcript_variant,intron_variant                                                |

|              |                                                                                                                            |
|--------------|----------------------------------------------------------------------------------------------------------------------------|
| rs1213306008 | genic_upstream_transcript_variant,intron_variant                                                                           |
| rs1213348202 | intron_variant                                                                                                             |
| rs1213351920 | genic_upstream_transcript_variant,intron_variant                                                                           |
| rs1213371501 | intron_variant                                                                                                             |
| rs1213379562 | intron_variant                                                                                                             |
| rs1213384633 | genic_upstream_transcript_variant,intron_variant                                                                           |
| rs1213439168 | intron_variant                                                                                                             |
| rs1213538795 | intron_variant                                                                                                             |
| rs1213545724 | intron_variant                                                                                                             |
| rs1213576258 | genic_upstream_transcript_variant,intron_variant                                                                           |
| rs1213593403 | intron_variant                                                                                                             |
| rs1213595530 | intron_variant                                                                                                             |
| rs1213598358 | intron_variant                                                                                                             |
| rs1213652522 | genic_upstream_transcript_variant,intron_variant                                                                           |
| rs1213754829 | genic_upstream_transcript_variant,intron_variant                                                                           |
| rs1213756333 | intron_variant                                                                                                             |
| rs1213780293 | genic_upstream_transcript_variant,intron_variant                                                                           |
| rs1213812053 | genic_upstream_transcript_variant,intron_variant                                                                           |
| rs1213835400 | intron_variant                                                                                                             |
| rs1213842740 | intron_variant                                                                                                             |
| rs1213870492 | intron_variant                                                                                                             |
| rs1213887634 | genic_downstream_transcript_variant,intron_variant                                                                         |
| rs1213892973 | intron_variant                                                                                                             |
| rs1213894549 | genic_downstream_transcript_variant,intron_variant                                                                         |
| rs1213907373 | genic_downstream_transcript_variant,intron_variant                                                                         |
| rs1213983523 | intron_variant                                                                                                             |
| rs1214032894 | genic_downstream_transcript_variant,intron_variant                                                                         |
| rs1214044515 | genic_downstream_transcript_variant,intron_variant                                                                         |
| rs1214058558 | genic_upstream_transcript_variant,intron_variant                                                                           |
| rs1214061891 | genic_upstream_transcript_variant,intron_variant                                                                           |
| rs1214069939 | genic_downstream_transcript_variant,intron_variant                                                                         |
| rs1214116690 | intron_variant                                                                                                             |
| rs1214144183 | upstream_transcript_variant,genic_upstream_transcript_variant,intron_variant                                               |
| rs1214183349 | genic_downstream_transcript_variant,intron_variant                                                                         |
| rs1214217581 | genic_upstream_transcript_variant,intron_variant                                                                           |
| rs1214282117 | genic_upstream_transcript_variant,intron_variant                                                                           |
| rs1214291712 | genic_upstream_transcript_variant,intron_variant                                                                           |
| rs1214323810 | genic_upstream_transcript_variant,splice_acceptor_variant,non_coding_transcript_variant,5_prime_UTR_variant,intron_variant |
| rs1214336919 | intron_variant                                                                                                             |
| rs1214345369 | genic_downstream_transcript_variant,intron_variant                                                                         |
| rs1214382967 | genic_downstream_transcript_variant,intron_variant                                                                         |
| rs1214435284 | genic_upstream_transcript_variant,intron_variant                                                                           |
| rs1214437689 | genic_downstream_transcript_variant,intron_variant                                                                         |
| rs1214458686 | downstream_transcript_variant,500B_downstream_variant                                                                      |
| rs1214466956 | intron_variant                                                                                                             |
| rs1214480544 | genic_upstream_transcript_variant,intron_variant                                                                           |
| rs1214489838 | genic_downstream_transcript_variant,intron_variant                                                                         |
| rs1214495034 | genic_upstream_transcript_variant,intron_variant                                                                           |
| rs1214533769 | genic_downstream_transcript_variant,intron_variant                                                                         |
| rs1214595204 | intron_variant                                                                                                             |
| rs1214615074 | genic_upstream_transcript_variant,intron_variant                                                                           |
| rs1214629015 | genic_downstream_transcript_variant,coding_sequence_variant,non_coding_transcript_variant,synonymous_variant               |
| rs1214651018 | genic_downstream_transcript_variant,coding_sequence_variant,non_coding_transcript_variant,synonymous_variant               |
| rs1214661333 | intron_variant                                                                                                             |
| rs1214672674 | intron_variant                                                                                                             |
| rs1214697791 | genic_upstream_transcript_variant,intron_variant                                                                           |
| rs1214706525 | intron_variant                                                                                                             |
| rs1214763053 | intron_variant                                                                                                             |
| rs1214771086 | genic_upstream_transcript_variant,intron_variant                                                                           |
| rs1214864480 | genic_downstream_transcript_variant,intron_variant                                                                         |
| rs1214869117 | intron_variant                                                                                                             |
| rs1214874796 | intron_variant                                                                                                             |
| rs1214919132 | genic_upstream_transcript_variant,intron_variant                                                                           |
| rs1214940547 | genic_downstream_transcript_variant,intron_variant                                                                         |
| rs1215002304 | genic_upstream_transcript_variant,upstream_transcript_variant,2KB_upstream_variant,intron_variant                          |
| rs1215069290 | genic_upstream_transcript_variant,intron_variant                                                                           |
| rs1215092339 | upstream_transcript_variant,genic_upstream_transcript_variant,intron_variant                                               |
| rs1215093301 | intron_variant                                                                                                             |
| rs1215159649 | intron_variant                                                                                                             |
| rs1215172960 | intron_variant                                                                                                             |
| rs1215212193 | genic_upstream_transcript_variant,intron_variant                                                                           |
| rs1215276759 | genic_upstream_transcript_variant,intron_variant                                                                           |
| rs1215352770 | upstream_transcript_variant,genic_upstream_transcript_variant,intron_variant                                               |
| rs1215391711 | genic_upstream_transcript_variant,intron_variant                                                                           |

|              |                                                                                                                               |
|--------------|-------------------------------------------------------------------------------------------------------------------------------|
| rs1215410089 | intron_variant                                                                                                                |
| rs1215438121 | intron_variant                                                                                                                |
| rs1215479478 | intron_variant                                                                                                                |
| rs1215504173 | genic_downstream_transcript_variant,intron_variant                                                                            |
| rs1215518337 | intron_variant                                                                                                                |
| rs1215532441 | genic_upstream_transcript_variant,intron_variant                                                                              |
| rs1215560654 | intron_variant                                                                                                                |
| rs1215578357 | genic_upstream_transcript_variant,intron_variant                                                                              |
| rs1215580408 | genic_downstream_transcript_variant,intron_variant                                                                            |
| rs1215589880 | upstream_transcript_variant,genic_upstream_transcript_variant,5_prime_UTR_variant,intron_variant                              |
| rs1215593992 | genic_downstream_transcript_variant,intron_variant                                                                            |
| rs1215597155 | genic_downstream_transcript_variant,intron_variant                                                                            |
| rs1215600480 | intron_variant                                                                                                                |
| rs1215621530 | intron_variant                                                                                                                |
| rs1215643280 | genic_upstream_transcript_variant,intron_variant                                                                              |
| rs1215649030 | intron_variant                                                                                                                |
| rs1215715680 | genic_downstream_transcript_variant,intron_variant                                                                            |
| rs1215721337 | intron_variant                                                                                                                |
| rs1215725527 | genic_downstream_transcript_variant,intron_variant                                                                            |
| rs1215793236 | genic_upstream_transcript_variant,intron_variant                                                                              |
| rs1215798406 | intron_variant                                                                                                                |
| rs1215819797 | intron_variant                                                                                                                |
| rs1215821599 | intron_variant                                                                                                                |
| rs1215821934 | genic_upstream_transcript_variant,intron_variant                                                                              |
| rs1215887064 | intron_variant                                                                                                                |
| rs1215904394 | intron_variant                                                                                                                |
| rs1215910345 | intron_variant                                                                                                                |
| rs1215916275 | genic_upstream_transcript_variant,intron_variant                                                                              |
| rs1215968260 | genic_upstream_transcript_variant,intron_variant                                                                              |
| rs1215968927 | genic_upstream_transcript_variant,intron_variant                                                                              |
| rs1216020976 | genic_upstream_transcript_variant,intron_variant                                                                              |
| rs1216022895 | intron_variant                                                                                                                |
| rs1216027886 | genic_upstream_transcript_variant,intron_variant                                                                              |
| rs1216035158 | genic_upstream_transcript_variant,intron_variant                                                                              |
| rs1216061305 | genic_downstream_transcript_variant,intron_variant                                                                            |
| rs1216074038 | genic_upstream_transcript_variant,intron_variant                                                                              |
| rs1216129920 | genic_upstream_transcript_variant,intron_variant                                                                              |
| rs1216159165 | 2KB_upstream_variant,upstream_transcript_variant,genic_upstream_transcript_variant,intron_variant                             |
| rs1216209700 | genic_upstream_transcript_variant,intron_variant                                                                              |
| rs1216210728 | genic_downstream_transcript_variant,intron_variant                                                                            |
| rs1216214375 | intron_variant                                                                                                                |
| rs1216230885 | genic_upstream_transcript_variant,intron_variant                                                                              |
| rs1216243229 | genic_upstream_transcript_variant,intron_variant                                                                              |
| rs1216304845 | intron_variant                                                                                                                |
| rs1216307191 | upstream_transcript_variant,genic_upstream_transcript_variant,intron_variant                                                  |
| rs1216364792 | intron_variant                                                                                                                |
| rs1216365724 | genic_upstream_transcript_variant,intron_variant                                                                              |
| rs1216405041 | genic_upstream_transcript_variant,intron_variant                                                                              |
| rs1216442573 | genic_upstream_transcript_variant,intron_variant                                                                              |
| rs1216515288 | 2KB_upstream_variant,upstream_transcript_variant,genic_upstream_transcript_variant,intron_variant                             |
| rs1216606981 | intron_variant                                                                                                                |
| rs1216619781 | genic_downstream_transcript_variant,non_coding_transcript_variant,3_prime_UTR_variant                                         |
| rs1216624347 | intron_variant                                                                                                                |
| rs1216664466 | genic_upstream_transcript_variant,upstream_transcript_variant,2KB_upstream_variant,intron_variant                             |
| rs1216682962 | genic_upstream_transcript_variant,intron_variant                                                                              |
| rs1216685767 | genic_upstream_transcript_variant,intron_variant                                                                              |
| rs1216706835 | intron_variant                                                                                                                |
| rs1216717757 | intron_variant                                                                                                                |
| rs1216730134 | intron_variant                                                                                                                |
| rs1216733215 | intron_variant                                                                                                                |
| rs1216794136 | genic_upstream_transcript_variant,intron_variant                                                                              |
| rs1216816717 | intron_variant                                                                                                                |
| rs1216839882 | intron_variant                                                                                                                |
| rs1216854737 | genic_upstream_transcript_variant,intron_variant                                                                              |
| rs1216868539 | genic_downstream_transcript_variant,intron_variant                                                                            |
| rs1216885275 | intron_variant                                                                                                                |
| rs1216911284 | genic_upstream_transcript_variant,intron_variant                                                                              |
| rs1216931638 | genic_downstream_transcript_variant,synonymous_variant,non_coding_transcript_variant,missense_variant,coding_sequence_variant |
| rs1216964684 | intron_variant                                                                                                                |
| rs1216968896 | intron_variant                                                                                                                |
| rs1216984631 | intron_variant                                                                                                                |
| rs1217017258 | genic_upstream_transcript_variant,intron_variant                                                                              |
| rs1217053924 | genic_downstream_transcript_variant,intron_variant                                                                            |
| rs1217077605 | genic_upstream_transcript_variant,intron_variant                                                                              |

|              |                                                                                                   |
|--------------|---------------------------------------------------------------------------------------------------|
| rs1217087416 | genic_downstream_transcript_variant,intron_variant                                                |
| rs1217118002 | intron_variant                                                                                    |
| rs1217154545 | intron_variant                                                                                    |
| rs1217158089 | genic_upstream_transcript_variant,intron_variant                                                  |
| rs1217179005 | genic_upstream_transcript_variant,intron_variant                                                  |
| rs1217213931 | genic_upstream_transcript_variant,intron_variant                                                  |
| rs1217229328 | genic_downstream_transcript_variant,intron_variant                                                |
| rs1217234677 | intron_variant                                                                                    |
| rs1217240021 | genic_upstream_transcript_variant,intron_variant                                                  |
| rs1217247389 | upstream_transcript_variant,genic_upstream_transcript_variant,intron_variant                      |
| rs1217264494 | genic_upstream_transcript_variant,intron_variant                                                  |
| rs1217292407 | genic_downstream_transcript_variant,intron_variant                                                |
| rs1217296763 | genic_upstream_transcript_variant,intron_variant                                                  |
| rs1217378290 | intron_variant                                                                                    |
| rs1217459159 | genic_upstream_transcript_variant,intron_variant                                                  |
| rs1217459359 | genic_downstream_transcript_variant,intron_variant                                                |
| rs1217477142 | genic_upstream_transcript_variant,upstream_transcript_variant,2KB_upstream_variant,intron_variant |
| rs1217498767 | genic_upstream_transcript_variant,intron_variant                                                  |
| rs1217564612 | genic_upstream_transcript_variant,intron_variant                                                  |
| rs1217565423 | genic_upstream_transcript_variant,intron_variant                                                  |
| rs1217634591 | intron_variant                                                                                    |
| rs1217645734 | intron_variant                                                                                    |
| rs1217657808 | genic_upstream_transcript_variant,intron_variant                                                  |
| rs1217665419 | intron_variant                                                                                    |
| rs1217682541 | genic_upstream_transcript_variant,intron_variant                                                  |
| rs1217690442 | genic_upstream_transcript_variant,intron_variant                                                  |
| rs1217756818 | genic_upstream_transcript_variant,intron_variant                                                  |
| rs1217816070 | genic_upstream_transcript_variant,intron_variant                                                  |
| rs1217876205 | intron_variant                                                                                    |
| rs1217887756 | intron_variant                                                                                    |
| rs1217893157 | genic_upstream_transcript_variant,intron_variant                                                  |
| rs1217942331 | intron_variant                                                                                    |
| rs1217950288 | intron_variant                                                                                    |
| rs1217968266 | genic_downstream_transcript_variant,intron_variant                                                |
| rs1217974140 | intron_variant                                                                                    |
| rs1217985027 | genic_downstream_transcript_variant,intron_variant                                                |
| rs1217990676 | genic_upstream_transcript_variant,intron_variant                                                  |
| rs1217998648 | intron_variant                                                                                    |
| rs1218003906 | non_coding_transcript_variant,coding_sequence_variant,missense_variant                            |
| rs1218041925 | intron_variant                                                                                    |
| rs1218043975 | 5_prime_UTR_variant,intron_variant                                                                |
| rs1218086070 | upstream_transcript_variant,genic_upstream_transcript_variant,intron_variant                      |
| rs1218090193 | intron_variant                                                                                    |
| rs1218100612 | intron_variant                                                                                    |
| rs1218108482 | upstream_transcript_variant,genic_upstream_transcript_variant,intron_variant                      |
| rs1218118118 | intron_variant                                                                                    |
| rs1218133562 | genic_upstream_transcript_variant,upstream_transcript_variant,2KB_upstream_variant,intron_variant |
| rs1218137304 | upstream_transcript_variant,genic_upstream_transcript_variant,intron_variant                      |
| rs1218140083 | genic_upstream_transcript_variant,intron_variant                                                  |
| rs1218232880 | genic_upstream_transcript_variant,intron_variant                                                  |
| rs1218241359 | genic_upstream_transcript_variant,intron_variant                                                  |
| rs1218251768 | genic_upstream_transcript_variant,intron_variant                                                  |
| rs1218264520 | genic_upstream_transcript_variant,intron_variant                                                  |
| rs1218278185 | genic_upstream_transcript_variant,intron_variant                                                  |
| rs1218348180 | intron_variant                                                                                    |
| rs1218359091 | genic_upstream_transcript_variant,intron_variant                                                  |
| rs1218373146 | genic_downstream_transcript_variant,intron_variant                                                |
| rs1218374112 | genic_upstream_transcript_variant,upstream_transcript_variant,2KB_upstream_variant,intron_variant |
| rs1218376235 | intron_variant                                                                                    |
| rs1218396634 | intron_variant                                                                                    |
| rs1218430563 | intron_variant                                                                                    |
| rs1218461653 | genic_upstream_transcript_variant,intron_variant                                                  |
| rs1218466398 | genic_upstream_transcript_variant,intron_variant                                                  |
| rs1218474741 | genic_upstream_transcript_variant,intron_variant                                                  |
| rs1218478527 | intron_variant                                                                                    |
| rs1218514479 | intron_variant                                                                                    |
| rs1218517674 | genic_upstream_transcript_variant,intron_variant                                                  |
| rs1218521600 | genic_upstream_transcript_variant,intron_variant                                                  |
| rs1218528592 | genic_upstream_transcript_variant,intron_variant                                                  |
| rs1218537665 | intron_variant                                                                                    |
| rs1218538929 | 2KB_upstream_variant,upstream_transcript_variant,genic_upstream_transcript_variant,intron_variant |
| rs1218560740 | genic_upstream_transcript_variant,intron_variant                                                  |
| rs1218563207 | 2KB_upstream_variant,upstream_transcript_variant,genic_upstream_transcript_variant,intron_variant |
| rs1218565132 | intron_variant                                                                                    |

|              |                                                                                                    |
|--------------|----------------------------------------------------------------------------------------------------|
| rs1218582530 | genic_upstream_transcript_variant,intron_variant                                                   |
| rs1218585805 | intron_variant                                                                                     |
| rs1218618057 | genic_upstream_transcript_variant,intron_variant                                                   |
| rs1218625511 | intron_variant                                                                                     |
| rs1218669045 | intron_variant                                                                                     |
| rs1218673336 | genic_downstream_transcript_variant,intron_variant                                                 |
| rs1218701804 | genic_upstream_transcript_variant,intron_variant                                                   |
| rs1218765177 | intron_variant                                                                                     |
| rs1218786145 | genic_upstream_transcript_variant,intron_variant                                                   |
| rs1218801177 | intron_variant                                                                                     |
| rs1218802139 | genic_downstream_transcript_variant,non_coding_transcript_variant,3_prime_UTR_variant              |
| rs1218816835 | intron_variant                                                                                     |
| rs1218840974 | intron_variant                                                                                     |
| rs1218847989 | genic_downstream_transcript_variant,intron_variant                                                 |
| rs1218876536 | non_coding_transcript_variant,genic_upstream_transcript_variant,5_prime_UTR_variant,intron_variant |
| rs1218930306 | genic_upstream_transcript_variant,intron_variant                                                   |
| rs1218936621 | genic_downstream_transcript_variant,non_coding_transcript_variant,3_prime_UTR_variant              |
| rs1218942279 | genic_upstream_transcript_variant,intron_variant                                                   |
| rs1218949047 | genic_downstream_transcript_variant,intron_variant                                                 |
| rs1218953889 | genic_downstream_transcript_variant,intron_variant                                                 |
| rs1218954381 | intron_variant                                                                                     |
| rs1218964250 | genic_upstream_transcript_variant,intron_variant                                                   |
| rs1218977476 | genic_upstream_transcript_variant,intron_variant                                                   |
| rs1219042592 | genic_upstream_transcript_variant,intron_variant                                                   |
| rs1219061648 | upstream_transcript_variant,genic_upstream_transcript_variant,intron_variant                       |
| rs1219072645 | intron_variant                                                                                     |
| rs1219079130 | intron_variant                                                                                     |
| rs1219127604 | intron_variant                                                                                     |
| rs1219128253 | genic_upstream_transcript_variant,intron_variant                                                   |
| rs1219154876 | genic_downstream_transcript_variant,intron_variant                                                 |
| rs1219156328 | genic_upstream_transcript_variant,intron_variant                                                   |
| rs1219182965 | upstream_transcript_variant,genic_upstream_transcript_variant,intron_variant                       |
| rs1219188801 | genic_upstream_transcript_variant,intron_variant                                                   |
| rs1219221108 | genic_downstream_transcript_variant,intron_variant                                                 |
| rs1219223787 | genic_upstream_transcript_variant,intron_variant                                                   |
| rs1219227607 | intron_variant                                                                                     |
| rs1219259039 | genic_upstream_transcript_variant,intron_variant                                                   |
| rs1219264141 | genic_downstream_transcript_variant,intron_variant                                                 |
| rs1219291944 | genic_upstream_transcript_variant,intron_variant                                                   |
| rs1219300147 | genic_upstream_transcript_variant,intron_variant                                                   |
| rs1219303467 | genic_upstream_transcript_variant,intron_variant                                                   |
| rs1219318008 | genic_upstream_transcript_variant,upstream_transcript_variant,2KB_upstream_variant,intron_variant  |
| rs1219322267 | upstream_transcript_variant,genic_upstream_transcript_variant,intron_variant                       |
| rs1219352205 | genic_downstream_transcript_variant,intron_variant                                                 |
| rs1219383236 | intron_variant                                                                                     |
| rs1219418868 | genic_downstream_transcript_variant,intron_variant                                                 |
| rs1219438538 | upstream_transcript_variant,genic_upstream_transcript_variant,intron_variant                       |
| rs1219463067 | genic_downstream_transcript_variant,intron_variant                                                 |
| rs1219464462 | genic_upstream_transcript_variant,intron_variant                                                   |
| rs1219473635 | intron_variant                                                                                     |
| rs1219492091 | genic_upstream_transcript_variant,intron_variant                                                   |
| rs1219517050 | genic_upstream_transcript_variant,intron_variant                                                   |
| rs1219561715 | downstream_transcript_variant,500B_downstream_variant                                              |
| rs1219578408 | intron_variant                                                                                     |
| rs1219579840 | intron_variant                                                                                     |
| rs1219592208 | genic_downstream_transcript_variant,non_coding_transcript_variant,3_prime_UTR_variant              |
| rs1219600638 | intron_variant                                                                                     |
| rs1219656045 | intron_variant                                                                                     |
| rs1219692925 | intron_variant                                                                                     |
| rs1219707301 | intron_variant                                                                                     |
| rs1219732643 | intron_variant                                                                                     |
| rs1219780465 | intron_variant                                                                                     |
| rs1219789485 | upstream_transcript_variant,genic_upstream_transcript_variant,intron_variant                       |
| rs1219794645 | intron_variant                                                                                     |
| rs1219796168 | intron_variant                                                                                     |
| rs1219801720 | genic_upstream_transcript_variant,intron_variant                                                   |
| rs1219840736 | intron_variant                                                                                     |
| rs1219843125 | intron_variant                                                                                     |
| rs1219864210 | intron_variant                                                                                     |
| rs1219879836 | upstream_transcript_variant,genic_upstream_transcript_variant,intron_variant                       |
| rs1219924034 | genic_upstream_transcript_variant,intron_variant                                                   |
| rs1219934595 | intron_variant                                                                                     |
| rs1219970078 | intron_variant                                                                                     |
| rs1219975946 | genic_upstream_transcript_variant,intron_variant                                                   |

|              |                                                                                                                                             |
|--------------|---------------------------------------------------------------------------------------------------------------------------------------------|
| rs1219979845 | non_coding_transcript_variant,coding_sequence_variant,missense_variant                                                                      |
| rs1220008281 | genic_upstream_transcript_variant,intron_variant                                                                                            |
| rs1220008503 | genic_downstream_transcript_variant,intron_variant                                                                                          |
| rs1220053493 | genic_upstream_transcript_variant,upstream_transcript_variant,2KB_upstream_variant,intron_variant                                           |
| rs1220132786 | genic_upstream_transcript_variant,intron_variant                                                                                            |
| rs1220133688 | 2KB_upstream_variant,upstream_transcript_variant,genic_upstream_transcript_variant,intron_variant                                           |
| rs1220163497 | genic_upstream_transcript_variant,intron_variant                                                                                            |
| rs1220243533 | intron_variant                                                                                                                              |
| rs1220252989 | genic_downstream_transcript_variant,intron_variant                                                                                          |
| rs1220274849 | genic_downstream_transcript_variant,downstream_transcript_variant,intron_variant                                                            |
| rs1220275126 | genic_upstream_transcript_variant,intron_variant                                                                                            |
| rs1220332878 | genic_upstream_transcript_variant,intron_variant                                                                                            |
| rs1220337646 | genic_upstream_transcript_variant,intron_variant                                                                                            |
| rs1220401962 | genic_upstream_transcript_variant,intron_variant                                                                                            |
| rs1220413698 | genic_downstream_transcript_variant,intron_variant                                                                                          |
| rs1220441014 | intron_variant                                                                                                                              |
| rs1220497421 | intron_variant                                                                                                                              |
| rs1220510213 | intron_variant                                                                                                                              |
| rs1220625114 | intron_variant                                                                                                                              |
| rs1220636610 | genic_upstream_transcript_variant,intron_variant                                                                                            |
| rs1220696247 | genic_upstream_transcript_variant,intron_variant                                                                                            |
| rs1220707166 | genic_upstream_transcript_variant,intron_variant                                                                                            |
| rs1220736985 | genic_upstream_transcript_variant,intron_variant                                                                                            |
| rs1220741034 | genic_downstream_transcript_variant,intron_variant                                                                                          |
| rs1220749635 | intron_variant                                                                                                                              |
| rs1220756470 | intron_variant                                                                                                                              |
| rs1220790097 | intron_variant                                                                                                                              |
| rs1220855951 | genic_upstream_transcript_variant,intron_variant                                                                                            |
| rs1220859289 | genic_downstream_transcript_variant,intron_variant                                                                                          |
| rs1220881862 | genic_upstream_transcript_variant,intron_variant                                                                                            |
| rs1220990290 | genic_downstream_transcript_variant,non_coding_transcript_variant,3_prime_UTR_variant                                                       |
| rs1220998769 | intron_variant                                                                                                                              |
| rs1221055168 | genic_upstream_transcript_variant,intron_variant                                                                                            |
| rs1221137453 | genic_upstream_transcript_variant,intron_variant                                                                                            |
| rs1221139844 | intron_variant                                                                                                                              |
| rs1221158616 | genic_upstream_transcript_variant,intron_variant                                                                                            |
| rs1221167966 | genic_upstream_transcript_variant,intron_variant                                                                                            |
| rs1221168542 | genic_upstream_transcript_variant,intron_variant                                                                                            |
| rs1221322641 | intron_variant                                                                                                                              |
| rs1221330236 | genic_upstream_transcript_variant,intron_variant                                                                                            |
| rs1221358445 | genic_upstream_transcript_variant,intron_variant                                                                                            |
| rs1221362186 | genic_upstream_transcript_variant,upstream_transcript_variant,intron_variant                                                                |
| rs1221407039 | genic_upstream_transcript_variant,intron_variant                                                                                            |
| rs1221464156 | genic_downstream_transcript_variant,intron_variant                                                                                          |
| rs1221476287 | genic_upstream_transcript_variant,intron_variant                                                                                            |
| rs1221498435 | genic_upstream_transcript_variant,intron_variant                                                                                            |
| rs1221502920 | intron_variant                                                                                                                              |
| rs1221519846 | genic_upstream_transcript_variant,intron_variant                                                                                            |
| rs1221576031 | intron_variant                                                                                                                              |
| rs1221599495 | 2KB_upstream_variant,genic_upstream_transcript_variant,upstream_transcript_variant,intron_variant                                           |
| rs1221637466 | missense_variant,intron_variant,genic_upstream_transcript_variant,5_prime_UTR_variant,coding_sequence_variant,non_coding_transcript_variant |
| rs1221654406 | genic_upstream_transcript_variant,intron_variant                                                                                            |
| rs1221660653 | intron_variant                                                                                                                              |
| rs1221671630 | genic_upstream_transcript_variant,intron_variant                                                                                            |
| rs1221674339 | genic_upstream_transcript_variant,intron_variant                                                                                            |
| rs1221702844 | genic_upstream_transcript_variant,intron_variant                                                                                            |
| rs1221721610 | intron_variant                                                                                                                              |
| rs1221735312 | intron_variant                                                                                                                              |
| rs1221759893 | genic_upstream_transcript_variant,upstream_transcript_variant,intron_variant                                                                |
| rs1221760044 | genic_upstream_transcript_variant,intron_variant                                                                                            |
| rs1221763212 | genic_downstream_transcript_variant,synonymous_variant,coding_sequence_variant,non_coding_transcript_variant                                |
| rs1221781601 | intron_variant                                                                                                                              |
| rs1221787363 | genic_upstream_transcript_variant,upstream_transcript_variant,intron_variant                                                                |
| rs1221819207 | genic_upstream_transcript_variant,intron_variant                                                                                            |
| rs1221832301 | intron_variant                                                                                                                              |
| rs1221865571 | intron_variant                                                                                                                              |
| rs1221883668 | genic_upstream_transcript_variant,intron_variant                                                                                            |
| rs1221926046 | genic_downstream_transcript_variant,3_prime_UTR_variant,non_coding_transcript_variant                                                       |
| rs1221927980 | intron_variant                                                                                                                              |
| rs1221939796 | genic_upstream_transcript_variant,intron_variant                                                                                            |
| rs1221954630 | genic_upstream_transcript_variant,intron_variant                                                                                            |
| rs1221995647 | intron_variant                                                                                                                              |
| rs1222044946 | genic_upstream_transcript_variant,intron_variant                                                                                            |
| rs1222096100 | genic_upstream_transcript_variant,intron_variant                                                                                            |

|              |                                                                                                   |
|--------------|---------------------------------------------------------------------------------------------------|
| rs1222119998 | genic_upstream_transcript_variant,intron_variant                                                  |
| rs1222144296 | intron_variant                                                                                    |
| rs1222168005 | genic_downstream_transcript_variant,intron_variant                                                |
| rs1222201717 | 2KB_upstream_variant,upstream_transcript_variant,intron_variant,genic_upstream_transcript_variant |
| rs1222216538 | genic_downstream_transcript_variant,intron_variant                                                |
| rs1222227505 | genic_upstream_transcript_variant,intron_variant                                                  |
| rs1222286641 | genic_upstream_transcript_variant,intron_variant                                                  |
| rs1222326369 | intron_variant                                                                                    |
| rs1222334053 | intron_variant                                                                                    |
| rs1222395521 | genic_upstream_transcript_variant,intron_variant                                                  |
| rs1222405001 | genic_downstream_transcript_variant,intron_variant                                                |
| rs1222417976 | genic_upstream_transcript_variant,intron_variant                                                  |
| rs1222504860 | genic_downstream_transcript_variant,intron_variant                                                |
| rs1222524518 | intron_variant                                                                                    |
| rs1222543450 | genic_upstream_transcript_variant,intron_variant                                                  |
| rs1222565653 | genic_downstream_transcript_variant,intron_variant                                                |
| rs1222579313 | genic_upstream_transcript_variant,upstream_transcript_variant,intron_variant                      |
| rs1222627308 | genic_upstream_transcript_variant,intron_variant                                                  |
| rs1222647993 | genic_upstream_transcript_variant,upstream_transcript_variant,intron_variant                      |
| rs1222648684 | genic_downstream_transcript_variant,3_prime_UTR_variant,non_coding_transcript_variant             |
| rs1222649039 | genic_upstream_transcript_variant,intron_variant                                                  |
| rs1222669382 | 2KB_upstream_variant,genic_upstream_transcript_variant,upstream_transcript_variant,intron_variant |
| rs1222717069 | intron_variant                                                                                    |
| rs1222727434 | genic_downstream_transcript_variant,intron_variant                                                |
| rs1222742220 | 2KB_upstream_variant,genic_upstream_transcript_variant,upstream_transcript_variant,intron_variant |
| rs1222754697 | intron_variant                                                                                    |
| rs1222758859 | genic_downstream_transcript_variant,3_prime_UTR_variant,non_coding_transcript_variant             |
| rs1222777675 | intron_variant                                                                                    |
| rs1222786222 | intron_variant                                                                                    |
| rs1222794139 | genic_upstream_transcript_variant,intron_variant                                                  |
| rs1222843315 | genic_upstream_transcript_variant,upstream_transcript_variant,intron_variant                      |
| rs1222870130 | genic_upstream_transcript_variant,intron_variant                                                  |
| rs1222878777 | genic_downstream_transcript_variant,intron_variant                                                |
| rs1222905741 | genic_upstream_transcript_variant,intron_variant                                                  |
| rs1222915717 | intron_variant                                                                                    |
| rs1222927447 | intron_variant                                                                                    |
| rs1222938520 | genic_upstream_transcript_variant,intron_variant                                                  |
| rs1222947035 | genic_upstream_transcript_variant,intron_variant                                                  |
| rs1222986496 | intron_variant                                                                                    |
| rs1223092751 | intron_variant                                                                                    |
| rs1223132365 | genic_upstream_transcript_variant,intron_variant                                                  |
| rs1223134241 | genic_downstream_transcript_variant,intron_variant                                                |
| rs1223137322 | intron_variant                                                                                    |
| rs1223174669 | genic_downstream_transcript_variant,intron_variant                                                |
| rs1223201251 | intron_variant                                                                                    |
| rs1223210994 | intron_variant                                                                                    |
| rs1223222010 | intron_variant                                                                                    |
| rs1223234832 | genic_upstream_transcript_variant,intron_variant                                                  |
| rs1223250156 | genic_downstream_transcript_variant,intron_variant                                                |
| rs1223301394 | intron_variant                                                                                    |
| rs1223318804 | intron_variant                                                                                    |
| rs1223350367 | genic_upstream_transcript_variant,intron_variant                                                  |
| rs1223369694 | genic_downstream_transcript_variant,intron_variant                                                |
| rs1223414655 | genic_downstream_transcript_variant,intron_variant                                                |
| rs1223460200 | downstream_transcript_variant,500B_downstream_variant                                             |
| rs1223495569 | genic_upstream_transcript_variant,intron_variant                                                  |
| rs1223558287 | genic_upstream_transcript_variant,intron_variant                                                  |
| rs1223567432 | intron_variant                                                                                    |
| rs1223568666 | intron_variant                                                                                    |
| rs1223591160 | genic_upstream_transcript_variant,intron_variant                                                  |
| rs1223603530 | intron_variant                                                                                    |
| rs1223610189 | genic_downstream_transcript_variant,intron_variant                                                |
| rs1223636171 | genic_upstream_transcript_variant,intron_variant                                                  |
| rs1223689433 | genic_downstream_transcript_variant,intron_variant                                                |
| rs1223749319 | genic_upstream_transcript_variant,intron_variant                                                  |
| rs1223802785 | genic_upstream_transcript_variant,intron_variant                                                  |
| rs1223810503 | genic_downstream_transcript_variant,intron_variant                                                |
| rs1223845891 | genic_upstream_transcript_variant,intron_variant                                                  |
| rs1223905368 | 2KB_upstream_variant,upstream_transcript_variant,intron_variant,genic_upstream_transcript_variant |
| rs1223929172 | intron_variant                                                                                    |
| rs1223953978 | genic_upstream_transcript_variant,intron_variant                                                  |
| rs1224003582 | genic_downstream_transcript_variant,intron_variant                                                |
| rs1224011647 | genic_upstream_transcript_variant,intron_variant                                                  |
| rs1224033408 | genic_downstream_transcript_variant,intron_variant                                                |

|              |                                                                                                                                            |
|--------------|--------------------------------------------------------------------------------------------------------------------------------------------|
| rs1224043223 | genic_upstream_transcript_variant,intron_variant                                                                                           |
| rs1224084714 | genic_downstream_transcript_variant,intron_variant                                                                                         |
| rs1224099937 | intron_variant                                                                                                                             |
| rs1224106871 | intron_variant                                                                                                                             |
| rs1224107635 | genic_downstream_transcript_variant,intron_variant                                                                                         |
| rs1224155624 | intron_variant                                                                                                                             |
| rs1224163032 | intron_variant                                                                                                                             |
| rs1224167187 | genic_downstream_transcript_variant,intron_variant                                                                                         |
| rs1224186647 | 2KB_upstream_variant,genic_upstream_transcript_variant,upstream_transcript_variant,intron_variant                                          |
| rs1224204381 | genic_upstream_transcript_variant,intron_variant                                                                                           |
| rs1224255852 | intron_variant                                                                                                                             |
| rs1224288989 | intron_variant                                                                                                                             |
| rs1224331975 | genic_downstream_transcript_variant,intron_variant                                                                                         |
| rs1224332252 | 5_prime_UTR_variant,upstream_transcript_variant,intron_variant,genic_upstream_transcript_variant                                           |
| rs1224376930 | intron_variant                                                                                                                             |
| rs1224382769 | intron_variant                                                                                                                             |
| rs1224464741 | genic_upstream_transcript_variant,intron_variant                                                                                           |
| rs1224476144 | intron_variant                                                                                                                             |
| rs1224497987 | genic_upstream_transcript_variant,intron_variant                                                                                           |
| rs1224511467 | intron_variant                                                                                                                             |
| rs1224545132 | intron_variant                                                                                                                             |
| rs1224597864 | intron_variant                                                                                                                             |
| rs1224642756 | genic_downstream_transcript_variant,intron_variant                                                                                         |
| rs1224662715 | genic_upstream_transcript_variant,intron_variant                                                                                           |
| rs1224675146 | intron_variant                                                                                                                             |
| rs1224680436 | missense_variant,intron_variant,synonymous_variant,genic_upstream_transcript_variant,coding_sequence_variant,non_coding_transcript_variant |
| rs1224689436 | intron_variant                                                                                                                             |
| rs1224698236 | genic_upstream_transcript_variant,intron_variant                                                                                           |
| rs1224701388 | intron_variant                                                                                                                             |
| rs1224705929 | intron_variant                                                                                                                             |
| rs1224720832 | intron_variant                                                                                                                             |
| rs1224767478 | genic_upstream_transcript_variant,intron_variant                                                                                           |
| rs1224833848 | genic_upstream_transcript_variant,intron_variant                                                                                           |
| rs1224883191 | genic_upstream_transcript_variant,intron_variant                                                                                           |
| rs1224927716 | intron_variant                                                                                                                             |
| rs1224944892 | genic_downstream_transcript_variant,intron_variant                                                                                         |
| rs1224954264 | genic_downstream_transcript_variant,intron_variant                                                                                         |
| rs1224964269 | genic_upstream_transcript_variant,intron_variant                                                                                           |
| rs1225003038 | genic_downstream_transcript_variant,intron_variant                                                                                         |
| rs1225012831 | genic_downstream_transcript_variant,intron_variant                                                                                         |
| rs1225060575 | intron_variant                                                                                                                             |
| rs1225060760 | intron_variant                                                                                                                             |
| rs1225062422 | intron_variant                                                                                                                             |
| rs1225064569 | genic_downstream_transcript_variant,intron_variant                                                                                         |
| rs1225103516 | genic_upstream_transcript_variant,intron_variant                                                                                           |
| rs1225105688 | genic_downstream_transcript_variant,intron_variant                                                                                         |
| rs1225146848 | genic_upstream_transcript_variant,intron_variant                                                                                           |
| rs1225149337 | intron_variant                                                                                                                             |
| rs1225170663 | genic_upstream_transcript_variant,intron_variant                                                                                           |
| rs1225180946 | intron_variant                                                                                                                             |
| rs1225209076 | genic_upstream_transcript_variant,intron_variant                                                                                           |
| rs1225209376 | genic_downstream_transcript_variant,intron_variant                                                                                         |
| rs1225219480 | intron_variant                                                                                                                             |
| rs1225222038 | genic_downstream_transcript_variant,intron_variant                                                                                         |
| rs1225226071 | intron_variant                                                                                                                             |
| rs1225238848 | genic_downstream_transcript_variant,intron_variant                                                                                         |
| rs1225346727 | intron_variant                                                                                                                             |
| rs1225367781 | intron_variant                                                                                                                             |
| rs1225387817 | intron_variant                                                                                                                             |
| rs1225408406 | intron_variant                                                                                                                             |
| rs1225408683 | intron_variant                                                                                                                             |
| rs1225427331 | genic_upstream_transcript_variant,intron_variant                                                                                           |
| rs1225458521 | genic_downstream_transcript_variant,intron_variant                                                                                         |
| rs1225490440 | genic_upstream_transcript_variant,intron_variant                                                                                           |
| rs1225522515 | intron_variant                                                                                                                             |
| rs1225539426 | genic_upstream_transcript_variant,intron_variant                                                                                           |
| rs1225582482 | genic_upstream_transcript_variant,intron_variant                                                                                           |
| rs1225588592 | intron_variant                                                                                                                             |
| rs1225594603 | missense_variant,intron_variant,genic_upstream_transcript_variant,coding_sequence_variant,non_coding_transcript_variant                    |
| rs1225597759 | intron_variant                                                                                                                             |
| rs1225638395 | genic_upstream_transcript_variant,intron_variant                                                                                           |
| rs1225646520 | intron_variant                                                                                                                             |
| rs1225678316 | genic_upstream_transcript_variant,intron_variant                                                                                           |
| rs1225681469 | genic_upstream_transcript_variant,intron_variant                                                                                           |

|              |                                                                                                                         |
|--------------|-------------------------------------------------------------------------------------------------------------------------|
| rs1225696530 | intron_variant                                                                                                          |
| rs1225699255 | genic_upstream_transcript_variant,intron_variant                                                                        |
| rs1225707377 | genic_downstream_transcript_variant,intron_variant                                                                      |
| rs1225713805 | intron_variant                                                                                                          |
| rs1225737207 | intron_variant                                                                                                          |
| rs1225747315 | genic_downstream_transcript_variant,intron_variant                                                                      |
| rs1225808498 | genic_downstream_transcript_variant,intron_variant                                                                      |
| rs1225893232 | intron_variant                                                                                                          |
| rs1225895154 | genic_upstream_transcript_variant,intron_variant                                                                        |
| rs1225899421 | genic_upstream_transcript_variant,intron_variant                                                                        |
| rs1225923801 | intron_variant                                                                                                          |
| rs1225961153 | genic_downstream_transcript_variant,intron_variant                                                                      |
| rs1225978138 | genic_upstream_transcript_variant,upstream_transcript_variant,intron_variant                                            |
| rs1225986200 | genic_upstream_transcript_variant,upstream_transcript_variant,intron_variant                                            |
| rs1226000281 | genic_upstream_transcript_variant,intron_variant                                                                        |
| rs1226016140 | intron_variant                                                                                                          |
| rs1226064884 | genic_downstream_transcript_variant,intron_variant                                                                      |
| rs1226083454 | intron_variant                                                                                                          |
| rs1226094191 | genic_upstream_transcript_variant,intron_variant                                                                        |
| rs1226179537 | intron_variant                                                                                                          |
| rs1226255571 | intron_variant                                                                                                          |
| rs1226273140 | genic_downstream_transcript_variant,intron_variant                                                                      |
| rs1226291241 | genic_downstream_transcript_variant,intron_variant                                                                      |
| rs1226309216 | genic_upstream_transcript_variant,intron_variant                                                                        |
| rs1226309949 | intron_variant                                                                                                          |
| rs1226311988 | intron_variant                                                                                                          |
| rs1226362262 | genic_downstream_transcript_variant,intron_variant                                                                      |
| rs1226431517 | genic_upstream_transcript_variant,intron_variant                                                                        |
| rs1226433059 | genic_upstream_transcript_variant,intron_variant                                                                        |
| rs1226437895 | downstream_transcript_variant,500B_downstream_variant                                                                   |
| rs1226462336 | intron_variant                                                                                                          |
| rs1226470165 | genic_upstream_transcript_variant,intron_variant                                                                        |
| rs1226507710 | intron_variant                                                                                                          |
| rs1226515243 | genic_upstream_transcript_variant,upstream_transcript_variant,intron_variant                                            |
| rs1226551595 | genic_upstream_transcript_variant,intron_variant                                                                        |
| rs1226552031 | genic_downstream_transcript_variant,intron_variant                                                                      |
| rs1226559510 | intron_variant                                                                                                          |
| rs1226627452 | genic_upstream_transcript_variant,intron_variant                                                                        |
| rs1226670445 | genic_downstream_transcript_variant,intron_variant                                                                      |
| rs1226689670 | genic_upstream_transcript_variant,intron_variant                                                                        |
| rs1226720935 | intron_variant                                                                                                          |
| rs1226729961 | genic_upstream_transcript_variant,intron_variant                                                                        |
| rs1226806378 | genic_upstream_transcript_variant,intron_variant                                                                        |
| rs1226818300 | genic_upstream_transcript_variant,intron_variant                                                                        |
| rs1226841387 | genic_upstream_transcript_variant,intron_variant                                                                        |
| rs1226845463 | genic_downstream_transcript_variant,intron_variant                                                                      |
| rs1226861890 | genic_upstream_transcript_variant,intron_variant                                                                        |
| rs1226939060 | intron_variant                                                                                                          |
| rs1226959863 | intron_variant                                                                                                          |
| rs1226964890 | genic_upstream_transcript_variant,intron_variant                                                                        |
| rs1226966968 | intron_variant                                                                                                          |
| rs1226991663 | genic_upstream_transcript_variant,intron_variant                                                                        |
| rs1227046289 | genic_downstream_transcript_variant,intron_variant                                                                      |
| rs1227079159 | genic_downstream_transcript_variant,intron_variant                                                                      |
| rs1227091238 | missense_variant,intron_variant,genic_upstream_transcript_variant,coding_sequence_variant,non_coding_transcript_variant |
| rs1227153363 | intron_variant                                                                                                          |
| rs1227156192 | intron_variant                                                                                                          |
| rs1227167695 | intron_variant                                                                                                          |
| rs1227179836 | genic_upstream_transcript_variant,intron_variant                                                                        |
| rs1227197476 | intron_variant                                                                                                          |
| rs1227205972 | genic_upstream_transcript_variant,intron_variant                                                                        |
| rs1227206570 | 5_prime_UTR_variant,non_coding_transcript_variant,intron_variant,genic_upstream_transcript_variant                      |
| rs1227223433 | intron_variant                                                                                                          |
| rs1227280545 | genic_upstream_transcript_variant,intron_variant                                                                        |
| rs1227311436 | genic_upstream_transcript_variant,intron_variant                                                                        |
| rs1227335311 | genic_upstream_transcript_variant,intron_variant                                                                        |
| rs1227355036 | intron_variant                                                                                                          |
| rs1227408112 | intron_variant                                                                                                          |
| rs1227505469 | genic_upstream_transcript_variant,intron_variant                                                                        |
| rs1227530022 | intron_variant                                                                                                          |
| rs1227566865 | intron_variant                                                                                                          |
| rs1227569042 | genic_downstream_transcript_variant,intron_variant                                                                      |
| rs1227582782 | intron_variant                                                                                                          |
| rs1227626613 | genic_upstream_transcript_variant,intron_variant                                                                        |

|              |                                                                                                   |
|--------------|---------------------------------------------------------------------------------------------------|
| rs1227639879 | genic_upstream_transcript_variant,intron_variant                                                  |
| rs1227663377 | intron_variant                                                                                    |
| rs1227671284 | intron_variant                                                                                    |
| rs1227695316 | genic_upstream_transcript_variant,intron_variant                                                  |
| rs1227716087 | intron_variant                                                                                    |
| rs1227795260 | genic_upstream_transcript_variant,intron_variant                                                  |
| rs1227818910 | genic_upstream_transcript_variant,intron_variant                                                  |
| rs1227829336 | genic_upstream_transcript_variant,intron_variant                                                  |
| rs1227851611 | 2KB_upstream_variant,upstream_transcript_variant,intron_variant,genic_upstream_transcript_variant |
| rs1227854767 | intron_variant                                                                                    |
| rs1227924930 | genic_upstream_transcript_variant,intron_variant                                                  |
| rs1227939852 | genic_upstream_transcript_variant,intron_variant                                                  |
| rs1227946309 | genic_upstream_transcript_variant,intron_variant                                                  |
| rs1228006009 | genic_upstream_transcript_variant,intron_variant                                                  |
| rs1228030872 | genic_downstream_transcript_variant,intron_variant                                                |
| rs1228066468 | genic_upstream_transcript_variant,intron_variant                                                  |
| rs1228085611 | intron_variant                                                                                    |
| rs1228100842 | genic_downstream_transcript_variant,intron_variant                                                |
| rs1228112656 | genic_upstream_transcript_variant,intron_variant                                                  |
| rs1228137550 | intron_variant                                                                                    |
| rs1228138895 | intron_variant                                                                                    |
| rs1228167684 | genic_downstream_transcript_variant,intron_variant                                                |
| rs1228182400 | intron_variant                                                                                    |
| rs1228211068 | genic_upstream_transcript_variant,intron_variant                                                  |
| rs1228229618 | genic_upstream_transcript_variant,intron_variant                                                  |
| rs1228294519 | genic_upstream_transcript_variant,intron_variant                                                  |
| rs1228304526 | genic_upstream_transcript_variant,intron_variant                                                  |
| rs1228307500 | genic_downstream_transcript_variant,intron_variant                                                |
| rs1228320548 | genic_upstream_transcript_variant,intron_variant                                                  |
| rs1228338878 | genic_upstream_transcript_variant,upstream_transcript_variant,intron_variant                      |
| rs1228361885 | genic_upstream_transcript_variant,upstream_transcript_variant,intron_variant                      |
| rs1228362771 | genic_upstream_transcript_variant,intron_variant                                                  |
| rs1228381644 | intron_variant                                                                                    |
| rs1228402271 | 2KB_upstream_variant,genic_upstream_transcript_variant,upstream_transcript_variant,intron_variant |
| rs1228438123 | intron_variant                                                                                    |
| rs1228474374 | genic_downstream_transcript_variant,intron_variant                                                |
| rs1228479669 | genic_upstream_transcript_variant,intron_variant                                                  |
| rs1228483034 | genic_upstream_transcript_variant,intron_variant                                                  |
| rs1228488755 | genic_upstream_transcript_variant,intron_variant                                                  |
| rs1228495466 | intron_variant                                                                                    |
| rs1228514890 | intron_variant                                                                                    |
| rs1228544283 | intron_variant                                                                                    |
| rs1228587901 | genic_upstream_transcript_variant,intron_variant                                                  |
| rs1228641008 | genic_upstream_transcript_variant,intron_variant                                                  |
| rs1228643710 | intron_variant                                                                                    |
| rs1228683429 | genic_upstream_transcript_variant,intron_variant                                                  |
| rs1228683712 | genic_upstream_transcript_variant,intron_variant                                                  |
| rs1228709099 | genic_upstream_transcript_variant,intron_variant                                                  |
| rs1228808955 | genic_upstream_transcript_variant,intron_variant                                                  |
| rs1228869887 | intron_variant                                                                                    |
| rs1228899986 | intron_variant                                                                                    |
| rs1228930555 | genic_upstream_transcript_variant,intron_variant                                                  |
| rs1228951837 | genic_downstream_transcript_variant,3_prime_UTR_variant,non_coding_transcript_variant             |
| rs1228957883 | genic_downstream_transcript_variant,intron_variant                                                |
| rs1228968710 | genic_downstream_transcript_variant,intron_variant                                                |
| rs1229061935 | genic_upstream_transcript_variant,intron_variant                                                  |
| rs1229092747 | genic_upstream_transcript_variant,intron_variant                                                  |
| rs1229113386 | genic_upstream_transcript_variant,intron_variant                                                  |
| rs1229128530 | genic_upstream_transcript_variant,intron_variant                                                  |
| rs1229130114 | genic_upstream_transcript_variant,intron_variant                                                  |
| rs1229135891 | genic_upstream_transcript_variant,intron_variant                                                  |
| rs1229151724 | genic_upstream_transcript_variant,upstream_transcript_variant,intron_variant                      |
| rs1229160446 | genic_upstream_transcript_variant,intron_variant                                                  |
| rs1229220149 | intron_variant                                                                                    |
| rs1229271317 | genic_upstream_transcript_variant,intron_variant                                                  |
| rs1229295007 | genic_upstream_transcript_variant,intron_variant                                                  |
| rs1229299167 | intron_variant                                                                                    |
| rs1229307530 | genic_downstream_transcript_variant,downstream_transcript_variant,intron_variant                  |
| rs1229310577 | intron_variant                                                                                    |
| rs1229312045 | intron_variant                                                                                    |
| rs1229367145 | genic_downstream_transcript_variant,3_prime_UTR_variant,non_coding_transcript_variant             |
| rs1229381803 | intron_variant                                                                                    |
| rs1229397624 | genic_upstream_transcript_variant,intron_variant                                                  |
| rs1229402220 | genic_upstream_transcript_variant,intron_variant                                                  |

|              |                                                                                                                         |
|--------------|-------------------------------------------------------------------------------------------------------------------------|
| rs1229408685 | genic_upstream_transcript_variant,intron_variant                                                                        |
| rs1229421695 | intron_variant                                                                                                          |
| rs1229447635 | genic_upstream_transcript_variant,intron_variant                                                                        |
| rs1229487223 | genic_downstream_transcript_variant,3_prime_UTR_variant,non_coding_transcript_variant                                   |
| rs1229493852 | genic_upstream_transcript_variant,intron_variant                                                                        |
| rs1229506400 | genic_upstream_transcript_variant,intron_variant                                                                        |
| rs1229511041 | intron_variant                                                                                                          |
| rs1229514890 | genic_upstream_transcript_variant,intron_variant                                                                        |
| rs1229571629 | intron_variant                                                                                                          |
| rs1229572726 | intron_variant                                                                                                          |
| rs1229591207 | genic_upstream_transcript_variant,intron_variant                                                                        |
| rs1229593922 | missense_variant,intron_variant,genic_upstream_transcript_variant,coding_sequence_variant,non_coding_transcript_variant |
| rs1229607462 | genic_upstream_transcript_variant,intron_variant                                                                        |
| rs1229658669 | genic_upstream_transcript_variant,intron_variant                                                                        |
| rs1229688054 | genic_upstream_transcript_variant,intron_variant                                                                        |
| rs1229707662 | genic_upstream_transcript_variant,intron_variant                                                                        |
| rs1229728910 | genic_downstream_transcript_variant,intron_variant                                                                      |
| rs1229733734 | genic_upstream_transcript_variant,intron_variant                                                                        |
| rs1229737039 | genic_downstream_transcript_variant,intron_variant                                                                      |
| rs1229774845 | genic_downstream_transcript_variant,intron_variant                                                                      |
| rs1229803564 | genic_upstream_transcript_variant,intron_variant                                                                        |
| rs1229808090 | genic_downstream_transcript_variant,intron_variant                                                                      |
| rs1229870432 | genic_downstream_transcript_variant,3_prime_UTR_variant,non_coding_transcript_variant                                   |
| rs1229882987 | genic_downstream_transcript_variant,intron_variant                                                                      |
| rs1229918278 | genic_upstream_transcript_variant,intron_variant                                                                        |
| rs1229954521 | intron_variant                                                                                                          |
| rs1229971370 | genic_downstream_transcript_variant,intron_variant                                                                      |
| rs1230014614 | intron_variant                                                                                                          |
| rs1230065602 | genic_upstream_transcript_variant,intron_variant                                                                        |
| rs1230138417 | genic_downstream_transcript_variant,intron_variant                                                                      |
| rs1230160796 | intron_variant                                                                                                          |
| rs1230195272 | 5_prime_UTR_variant,intron_variant                                                                                      |
| rs1230201999 | intron_variant                                                                                                          |
| rs1230228661 | genic_downstream_transcript_variant,intron_variant                                                                      |
| rs1230305243 | genic_upstream_transcript_variant,intron_variant                                                                        |
| rs1230381311 | genic_upstream_transcript_variant,intron_variant                                                                        |
| rs1230386206 | intron_variant                                                                                                          |
| rs1230424308 | intron_variant                                                                                                          |
| rs1230452615 | genic_upstream_transcript_variant,intron_variant                                                                        |
| rs1230456059 | 2KB_upstream_variant,upstream_transcript_variant,intron_variant,genic_upstream_transcript_variant                       |
| rs1230481832 | intron_variant                                                                                                          |
| rs1230499713 | genic_upstream_transcript_variant,intron_variant                                                                        |
| rs1230512852 | genic_downstream_transcript_variant,intron_variant                                                                      |
| rs1230513660 | genic_upstream_transcript_variant,intron_variant                                                                        |
| rs1230563599 | genic_upstream_transcript_variant,intron_variant                                                                        |
| rs1230618834 | intron_variant                                                                                                          |
| rs1230625246 | genic_downstream_transcript_variant,intron_variant                                                                      |
| rs1230663213 | genic_upstream_transcript_variant,intron_variant                                                                        |
| rs1230681907 | genic_downstream_transcript_variant,intron_variant                                                                      |
| rs1230715421 | intron_variant                                                                                                          |
| rs1230731097 | genic_downstream_transcript_variant,intron_variant                                                                      |
| rs1230819446 | genic_upstream_transcript_variant,intron_variant                                                                        |
| rs1230825633 | genic_upstream_transcript_variant,intron_variant                                                                        |
| rs1230840605 | genic_upstream_transcript_variant,intron_variant                                                                        |
| rs1230894448 | intron_variant                                                                                                          |
| rs1230897683 | intron_variant                                                                                                          |
| rs1230898937 | intron_variant                                                                                                          |
| rs1230937035 | genic_upstream_transcript_variant,intron_variant                                                                        |
| rs1230951143 | genic_upstream_transcript_variant,intron_variant                                                                        |
| rs1230964289 | intron_variant                                                                                                          |
| rs1230985748 | intron_variant                                                                                                          |
| rs1231003085 | intron_variant                                                                                                          |
| rs1231007612 | intron_variant                                                                                                          |
| rs1231012742 | genic_upstream_transcript_variant,intron_variant                                                                        |
| rs1231115092 | intron_variant                                                                                                          |
| rs1231117505 | intron_variant                                                                                                          |
| rs1231149653 | genic_upstream_transcript_variant,intron_variant                                                                        |
| rs1231158668 | genic_upstream_transcript_variant,intron_variant                                                                        |
| rs1231165337 | genic_downstream_transcript_variant,3_prime_UTR_variant,non_coding_transcript_variant                                   |
| rs1231201110 | genic_upstream_transcript_variant,intron_variant                                                                        |
| rs1231267202 | intron_variant                                                                                                          |
| rs1231272435 | genic_upstream_transcript_variant,intron_variant                                                                        |
| rs1231324273 | intron_variant                                                                                                          |
| rs1231341397 | intron_variant                                                                                                          |

|              |                                                                                                   |
|--------------|---------------------------------------------------------------------------------------------------|
| rs1231354604 | genic_downstream_transcript_variant,intron_variant                                                |
| rs1231374786 | genic_upstream_transcript_variant,intron_variant                                                  |
| rs1231398922 | 2KB_upstream_variant,upstream_transcript_variant,intron_variant,genic_upstream_transcript_variant |
| rs1231402228 | genic_upstream_transcript_variant,intron_variant                                                  |
| rs1231458805 | intron_variant                                                                                    |
| rs1231479862 | 5_prime_UTR_variant,intron_variant                                                                |
| rs1231503107 | 5_prime_UTR_variant,intron_variant                                                                |
| rs1231507570 | genic_downstream_transcript_variant,downstream_transcript_variant,intron_variant                  |
| rs1231529408 | genic_upstream_transcript_variant,intron_variant                                                  |
| rs1231575293 | genic_upstream_transcript_variant,intron_variant                                                  |
| rs1231611391 | genic_upstream_transcript_variant,intron_variant                                                  |
| rs1231626589 | intron_variant                                                                                    |
| rs1231690050 | genic_downstream_transcript_variant,intron_variant                                                |
| rs1231735175 | intron_variant                                                                                    |
| rs1231742323 | intron_variant                                                                                    |
| rs1231772512 | genic_upstream_transcript_variant,intron_variant                                                  |
| rs1231781773 | intron_variant                                                                                    |
| rs1231805025 | genic_upstream_transcript_variant,intron_variant                                                  |
| rs1231852458 | intron_variant                                                                                    |
| rs1231852743 | intron_variant                                                                                    |
| rs1231856319 | intron_variant                                                                                    |
| rs1231875851 | genic_upstream_transcript_variant,intron_variant                                                  |
| rs1231883271 | genic_downstream_transcript_variant,3_prime_UTR_variant,non_coding_transcript_variant             |
| rs1231956990 | intron_variant                                                                                    |
| rs1231966438 | genic_upstream_transcript_variant,intron_variant                                                  |
| rs1232016975 | 2KB_upstream_variant,upstream_transcript_variant,intron_variant,genic_upstream_transcript_variant |
| rs1232057735 | intron_variant                                                                                    |
| rs1232061145 | genic_downstream_transcript_variant,intron_variant                                                |
| rs1232064433 | intron_variant                                                                                    |
| rs1232077999 | genic_upstream_transcript_variant,intron_variant                                                  |
| rs1232093375 | genic_upstream_transcript_variant,intron_variant                                                  |
| rs1232096092 | intron_variant                                                                                    |
| rs1232105599 | intron_variant                                                                                    |
| rs1232139763 | intron_variant                                                                                    |
| rs1232160041 | genic_upstream_transcript_variant,intron_variant                                                  |
| rs1232172495 | genic_downstream_transcript_variant,intron_variant                                                |
| rs1232245105 | genic_downstream_transcript_variant,intron_variant                                                |
| rs1232324523 | 2KB_upstream_variant,upstream_transcript_variant,intron_variant,genic_upstream_transcript_variant |
| rs1232331496 | genic_upstream_transcript_variant,intron_variant                                                  |
| rs1232370917 | intron_variant                                                                                    |
| rs1232375563 | intron_variant                                                                                    |
| rs1232420803 | intron_variant                                                                                    |
| rs1232436183 | genic_upstream_transcript_variant,upstream_transcript_variant,intron_variant                      |
| rs1232458237 | intron_variant                                                                                    |
| rs1232486656 | genic_upstream_transcript_variant,intron_variant                                                  |
| rs1232496532 | genic_upstream_transcript_variant,intron_variant                                                  |
| rs1232534816 | genic_downstream_transcript_variant,intron_variant                                                |
| rs1232582516 | genic_downstream_transcript_variant,intron_variant                                                |
| rs1232614145 | intron_variant                                                                                    |
| rs1232615249 | genic_upstream_transcript_variant,intron_variant                                                  |
| rs1232623795 | intron_variant                                                                                    |
| rs1232623846 | genic_upstream_transcript_variant,intron_variant                                                  |
| rs1232637074 | genic_upstream_transcript_variant,intron_variant                                                  |
| rs1232641857 | intron_variant                                                                                    |
| rs1232673465 | genic_upstream_transcript_variant,intron_variant                                                  |
| rs1232687474 | intron_variant                                                                                    |
| rs1232709115 | genic_upstream_transcript_variant,upstream_transcript_variant,intron_variant                      |
| rs1232731197 | genic_upstream_transcript_variant,intron_variant                                                  |
| rs1232738322 | genic_downstream_transcript_variant,intron_variant                                                |
| rs1232795077 | intron_variant                                                                                    |
| rs1232807514 | genic_upstream_transcript_variant,intron_variant                                                  |
| rs1232863608 | intron_variant                                                                                    |
| rs1232879423 | genic_downstream_transcript_variant,intron_variant                                                |
| rs1232892081 | genic_upstream_transcript_variant,intron_variant                                                  |
| rs1232933533 | intron_variant                                                                                    |
| rs1232947155 | genic_downstream_transcript_variant,intron_variant                                                |
| rs1232959517 | intron_variant                                                                                    |
| rs1232960075 | genic_upstream_transcript_variant,intron_variant                                                  |
| rs1232988004 | intron_variant                                                                                    |
| rs1233026792 | genic_downstream_transcript_variant,intron_variant                                                |
| rs1233043791 | genic_downstream_transcript_variant,intron_variant                                                |
| rs1233062399 | genic_upstream_transcript_variant,intron_variant                                                  |
| rs1233105584 | genic_upstream_transcript_variant,intron_variant                                                  |
| rs1233130248 | intron_variant                                                                                    |

|              |                                                                                                   |
|--------------|---------------------------------------------------------------------------------------------------|
| rs1233143350 | intron_variant                                                                                    |
| rs1233166956 | genic_downstream_transcript_variant,intron_variant                                                |
| rs1233171888 | genic_upstream_transcript_variant,intron_variant                                                  |
| rs1233186975 | genic_upstream_transcript_variant,intron_variant                                                  |
| rs1233219875 | genic_downstream_transcript_variant,3_prime_UTR_variant,non_coding_transcript_variant             |
| rs1233277641 | intron_variant                                                                                    |
| rs1233295872 | genic_downstream_transcript_variant,3_prime_UTR_variant,non_coding_transcript_variant             |
| rs1233298554 | intron_variant                                                                                    |
| rs1233307049 | genic_upstream_transcript_variant,intron_variant                                                  |
| rs1233396766 | genic_upstream_transcript_variant,intron_variant                                                  |
| rs1233443866 | genic_upstream_transcript_variant,intron_variant                                                  |
| rs1233475279 | intron_variant                                                                                    |
| rs1233500550 | genic_upstream_transcript_variant,intron_variant                                                  |
| rs1233566360 | intron_variant                                                                                    |
| rs1233566622 | genic_upstream_transcript_variant,intron_variant                                                  |
| rs1233590044 | genic_upstream_transcript_variant,intron_variant                                                  |
| rs1233620992 | intron_variant,genic_upstream_transcript_variant                                                  |
| rs1233621908 | upstream_transcript_variant,intron_variant,2KB_upstream_variant,genic_upstream_transcript_variant |
| rs1233687622 | intron_variant                                                                                    |
| rs1233780711 | intron_variant,genic_upstream_transcript_variant                                                  |
| rs1233802560 | intron_variant,genic_downstream_transcript_variant                                                |
| rs1233811822 | intron_variant,genic_upstream_transcript_variant                                                  |
| rs1233812726 | intron_variant,genic_downstream_transcript_variant                                                |
| rs1233836654 | intron_variant                                                                                    |
| rs1233839296 | intron_variant,genic_upstream_transcript_variant                                                  |
| rs1233852533 | intron_variant,genic_upstream_transcript_variant                                                  |
| rs1233864818 | intron_variant,genic_upstream_transcript_variant                                                  |
| rs1233869210 | intron_variant,genic_upstream_transcript_variant                                                  |
| rs1233871234 | intron_variant,genic_upstream_transcript_variant                                                  |
| rs1233881489 | intron_variant                                                                                    |
| rs1233893999 | intron_variant,genic_upstream_transcript_variant                                                  |
| rs1233896418 | intron_variant,genic_upstream_transcript_variant                                                  |
| rs1233902050 | intron_variant,genic_upstream_transcript_variant                                                  |
| rs1233941546 | intron_variant,genic_upstream_transcript_variant                                                  |
| rs1233951560 | intron_variant                                                                                    |
| rs1233988990 | intron_variant                                                                                    |
| rs1233991294 | intron_variant,genic_upstream_transcript_variant                                                  |
| rs1234062083 | intron_variant                                                                                    |
| rs1234063504 | intron_variant,genic_upstream_transcript_variant                                                  |
| rs1234095876 | intron_variant,genic_downstream_transcript_variant                                                |
| rs1234140847 | intron_variant,genic_upstream_transcript_variant                                                  |
| rs1234216281 | intron_variant,genic_downstream_transcript_variant                                                |
| rs1234232688 | intron_variant                                                                                    |
| rs1234274580 | intron_variant                                                                                    |
| rs1234304094 | intron_variant                                                                                    |
| rs1234306365 | intron_variant,genic_downstream_transcript_variant                                                |
| rs1234339598 | intron_variant,genic_upstream_transcript_variant                                                  |
| rs1234386547 | intron_variant                                                                                    |
| rs1234410632 | intron_variant                                                                                    |
| rs1234454292 | intron_variant,genic_upstream_transcript_variant                                                  |
| rs1234572151 | intron_variant                                                                                    |
| rs1234576771 | intron_variant                                                                                    |
| rs1234578029 | intron_variant                                                                                    |
| rs1234649278 | intron_variant                                                                                    |
| rs1234659408 | intron_variant                                                                                    |
| rs1234737057 | intron_variant                                                                                    |
| rs1234783494 | intron_variant,genic_upstream_transcript_variant                                                  |
| rs1234838177 | intron_variant,genic_upstream_transcript_variant                                                  |
| rs1234871797 | intron_variant                                                                                    |
| rs1234876925 | intron_variant,genic_upstream_transcript_variant                                                  |
| rs1234884854 | intron_variant                                                                                    |
| rs1234954636 | intron_variant,genic_downstream_transcript_variant                                                |
| rs1234963974 | intron_variant                                                                                    |
| rs1234966074 | intron_variant,genic_upstream_transcript_variant                                                  |
| rs1235023827 | intron_variant,genic_upstream_transcript_variant                                                  |
| rs1235076049 | intron_variant,genic_upstream_transcript_variant                                                  |
| rs1235118376 | intron_variant,genic_upstream_transcript_variant                                                  |
| rs1235120468 | intron_variant,genic_downstream_transcript_variant                                                |
| rs1235157276 | intron_variant,genic_downstream_transcript_variant                                                |
| rs1235194599 | intron_variant,genic_upstream_transcript_variant                                                  |
| rs1235224028 | intron_variant,genic_upstream_transcript_variant                                                  |
| rs1235227024 | intron_variant,genic_downstream_transcript_variant                                                |
| rs1235242184 | intron_variant,genic_upstream_transcript_variant                                                  |
| rs1235254882 | intron_variant,genic_upstream_transcript_variant                                                  |

|              |                                                                                                            |
|--------------|------------------------------------------------------------------------------------------------------------|
| rs1235256081 | intron_variant                                                                                             |
| rs1235268752 | intron_variant                                                                                             |
| rs1235270217 | intron_variant,genic_upstream_transcript_variant                                                           |
| rs1235281419 | intron_variant,genic_upstream_transcript_variant                                                           |
| rs1235283594 | intron_variant,genic_downstream_transcript_variant                                                         |
| rs1235341211 | intron_variant,genic_upstream_transcript_variant                                                           |
| rs1235380576 | intron_variant,genic_upstream_transcript_variant                                                           |
| rs1235395044 | intron_variant,genic_upstream_transcript_variant                                                           |
| rs1235451226 | intron_variant,genic_downstream_transcript_variant                                                         |
| rs1235460050 | intron_variant                                                                                             |
| rs1235489358 | intron_variant                                                                                             |
| rs1235496768 | intron_variant                                                                                             |
| rs1235537330 | intron_variant                                                                                             |
| rs1235593869 | intron_variant                                                                                             |
| rs1235692400 | intron_variant                                                                                             |
| rs1235696699 | intron_variant,genic_upstream_transcript_variant                                                           |
| rs1235714248 | intron_variant,genic_upstream_transcript_variant                                                           |
| rs1235750624 | intron_variant,genic_upstream_transcript_variant                                                           |
| rs1235755029 | genic_downstream_transcript_variant,missense_variant,coding_sequence_variant,non_coding_transcript_variant |
| rs1235811955 | intron_variant                                                                                             |
| rs1235856921 | intron_variant,genic_upstream_transcript_variant                                                           |
| rs1235876336 | intron_variant                                                                                             |
| rs1235882637 | intron_variant,genic_upstream_transcript_variant                                                           |
| rs1235885634 | intron_variant,genic_downstream_transcript_variant                                                         |
| rs1235902821 | intron_variant,genic_downstream_transcript_variant                                                         |
| rs1235911682 | intron_variant                                                                                             |
| rs1235958960 | intron_variant                                                                                             |
| rs1235967434 | intron_variant                                                                                             |
| rs1235977945 | intron_variant                                                                                             |
| rs1236023632 | intron_variant,genic_upstream_transcript_variant                                                           |
| rs1236023633 | intron_variant                                                                                             |
| rs1236051656 | intron_variant,genic_upstream_transcript_variant                                                           |
| rs1236072091 | intron_variant,genic_upstream_transcript_variant                                                           |
| rs1236077524 | intron_variant,genic_upstream_transcript_variant                                                           |
| rs1236128864 | intron_variant,upstream_transcript_variant,genic_upstream_transcript_variant                               |
| rs1236158827 | intron_variant,genic_upstream_transcript_variant                                                           |
| rs1236159398 | upstream_transcript_variant,5_prime_UTR_variant,intron_variant,genic_upstream_transcript_variant           |
| rs1236177974 | intron_variant,genic_upstream_transcript_variant                                                           |
| rs1236192811 | intron_variant                                                                                             |
| rs1236214906 | intron_variant,genic_upstream_transcript_variant                                                           |
| rs1236215887 | intron_variant                                                                                             |
| rs1236226209 | intron_variant                                                                                             |
| rs1236231025 | downstream_transcript_variant,500B_downstream_variant                                                      |
| rs1236233056 | intron_variant,upstream_transcript_variant,2KB_upstream_variant,genic_upstream_transcript_variant          |
| rs1236317966 | intron_variant,genic_upstream_transcript_variant                                                           |
| rs1236406125 | intron_variant,genic_downstream_transcript_variant                                                         |
| rs1236438776 | intron_variant,genic_downstream_transcript_variant                                                         |
| rs1236447067 | intron_variant                                                                                             |
| rs1236472509 | intron_variant                                                                                             |
| rs1236506742 | intron_variant,genic_upstream_transcript_variant                                                           |
| rs1236508845 | intron_variant                                                                                             |
| rs1236519089 | intron_variant,genic_upstream_transcript_variant                                                           |
| rs1236548414 | intron_variant,genic_upstream_transcript_variant                                                           |
| rs1236649959 | intron_variant                                                                                             |
| rs1236658863 | intron_variant                                                                                             |
| rs1236672662 | intron_variant                                                                                             |
| rs1236700359 | intron_variant,genic_upstream_transcript_variant                                                           |
| rs1236701900 | genic_downstream_transcript_variant,3_prime_UTR_variant,non_coding_transcript_variant                      |
| rs1236792774 | intron_variant,genic_downstream_transcript_variant                                                         |
| rs1236821779 | intron_variant,genic_downstream_transcript_variant                                                         |
| rs1236822695 | intron_variant,genic_upstream_transcript_variant                                                           |
| rs1236869672 | intron_variant,genic_upstream_transcript_variant                                                           |
| rs1236915456 | intron_variant                                                                                             |
| rs1236933109 | intron_variant                                                                                             |
| rs1237006751 | intron_variant,genic_upstream_transcript_variant                                                           |
| rs1237046425 | intron_variant,genic_downstream_transcript_variant                                                         |
| rs1237051749 | intron_variant,genic_upstream_transcript_variant                                                           |
| rs1237061041 | intron_variant                                                                                             |
| rs1237107479 | intron_variant                                                                                             |
| rs1237114831 | upstream_transcript_variant,intron_variant,2KB_upstream_variant,genic_upstream_transcript_variant          |
| rs1237130006 | intron_variant                                                                                             |
| rs1237135188 | intron_variant                                                                                             |
| rs1237166350 | intron_variant,genic_downstream_transcript_variant                                                         |
| rs1237229876 | intron_variant,upstream_transcript_variant,genic_upstream_transcript_variant                               |

|              |                                                                                                                         |
|--------------|-------------------------------------------------------------------------------------------------------------------------|
| rs1237234167 | intron_variant,genic_upstream_transcript_variant                                                                        |
| rs1237243858 | intron_variant,genic_downstream_transcript_variant                                                                      |
| rs1237267853 | intron_variant                                                                                                          |
| rs1237289073 | intron_variant                                                                                                          |
| rs1237410192 | intron_variant                                                                                                          |
| rs1237443951 | intron_variant,genic_downstream_transcript_variant                                                                      |
| rs1237453745 | intron_variant,genic_downstream_transcript_variant                                                                      |
| rs1237475770 | intron_variant,genic_downstream_transcript_variant                                                                      |
| rs1237533548 | intron_variant,genic_upstream_transcript_variant                                                                        |
| rs1237542066 | intron_variant,genic_downstream_transcript_variant                                                                      |
| rs1237564902 | frameshift_variant,genic_downstream_transcript_variant,coding_sequence_variant,non_coding_transcript_variant            |
| rs1237633030 | intron_variant                                                                                                          |
| rs1237636980 | intron_variant                                                                                                          |
| rs1237682517 | upstream_transcript_variant,intron_variant,2KB_upstream_variant,genic_upstream_transcript_variant                       |
| rs1237686591 | intron_variant                                                                                                          |
| rs1237698399 | intron_variant                                                                                                          |
| rs1237743341 | intron_variant                                                                                                          |
| rs1237798032 | intron_variant,genic_upstream_transcript_variant                                                                        |
| rs1237800472 | intron_variant                                                                                                          |
| rs1237842304 | intron_variant                                                                                                          |
| rs1237843704 | intron_variant,genic_upstream_transcript_variant                                                                        |
| rs1237888339 | intron_variant,genic_upstream_transcript_variant                                                                        |
| rs1237905483 | coding_sequence_variant,synonymous_variant,non_coding_transcript_variant                                                |
| rs1237945961 | intron_variant,genic_upstream_transcript_variant                                                                        |
| rs1238007014 | intron_variant                                                                                                          |
| rs1238009134 | intron_variant,genic_upstream_transcript_variant                                                                        |
| rs1238046931 | upstream_transcript_variant,intron_variant,2KB_upstream_variant,genic_upstream_transcript_variant                       |
| rs1238113666 | intron_variant,genic_upstream_transcript_variant                                                                        |
| rs1238138436 | intron_variant                                                                                                          |
| rs1238176721 | intron_variant,genic_upstream_transcript_variant                                                                        |
| rs1238225343 | intron_variant,genic_upstream_transcript_variant                                                                        |
| rs1238233483 | intron_variant,genic_upstream_transcript_variant                                                                        |
| rs1238252542 | intron_variant,genic_upstream_transcript_variant                                                                        |
| rs1238282285 | intron_variant                                                                                                          |
| rs1238305409 | intron_variant,genic_upstream_transcript_variant                                                                        |
| rs1238359909 | intron_variant,genic_downstream_transcript_variant                                                                      |
| rs1238394741 | intron_variant,genic_downstream_transcript_variant                                                                      |
| rs1238410605 | intron_variant,genic_upstream_transcript_variant                                                                        |
| rs1238424246 | intron_variant,genic_upstream_transcript_variant                                                                        |
| rs1238427947 | intron_variant                                                                                                          |
| rs1238457112 | intron_variant                                                                                                          |
| rs1238515894 | intron_variant,genic_upstream_transcript_variant                                                                        |
| rs1238516911 | intron_variant,genic_downstream_transcript_variant                                                                      |
| rs1238562865 | intron_variant                                                                                                          |
| rs1238589856 | intron_variant                                                                                                          |
| rs1238668438 | intron_variant,genic_upstream_transcript_variant                                                                        |
| rs1238726284 | intron_variant,genic_upstream_transcript_variant                                                                        |
| rs1238772696 | intron_variant                                                                                                          |
| rs1238790150 | intron_variant                                                                                                          |
| rs1238803216 | intron_variant                                                                                                          |
| rs1238825926 | intron_variant,genic_upstream_transcript_variant                                                                        |
| rs1238828612 | intron_variant,genic_upstream_transcript_variant                                                                        |
| rs1238834195 | intron_variant                                                                                                          |
| rs1238853911 | intron_variant,genic_upstream_transcript_variant                                                                        |
| rs1238877632 | intron_variant,genic_downstream_transcript_variant                                                                      |
| rs1238901545 | intron_variant,genic_upstream_transcript_variant                                                                        |
| rs1238907796 | intron_variant                                                                                                          |
| rs1238929514 | intron_variant,genic_upstream_transcript_variant                                                                        |
| rs1238960135 | intron_variant,upstream_transcript_variant,genic_upstream_transcript_variant                                            |
| rs1238960867 | intron_variant                                                                                                          |
| rs1238974806 | intron_variant,genic_upstream_transcript_variant                                                                        |
| rs1238980622 | intron_variant                                                                                                          |
| rs1238983700 | genic_downstream_transcript_variant,missense_variant,coding_sequence_variant,non_coding_transcript_variant              |
| rs1238985908 | genic_downstream_transcript_variant,3_prime_UTR_variant,non_coding_transcript_variant                                   |
| rs1239045246 | intron_variant,genic_upstream_transcript_variant                                                                        |
| rs1239045696 | intron_variant,upstream_transcript_variant,2KB_upstream_variant,genic_upstream_transcript_variant                       |
| rs1239054240 | intron_variant,upstream_transcript_variant,genic_upstream_transcript_variant                                            |
| rs1239064267 | intron_variant,genic_upstream_transcript_variant                                                                        |
| rs1239067028 | intron_variant                                                                                                          |
| rs1239162925 | intron_variant                                                                                                          |
| rs1239166904 | missense_variant,non_coding_transcript_variant,coding_sequence_variant,genic_upstream_transcript_variant,intron_variant |
| rs1239195789 | intron_variant                                                                                                          |
| rs1239202459 | intron_variant                                                                                                          |
| rs1239211431 | intron_variant                                                                                                          |

|              |                                                                                                   |
|--------------|---------------------------------------------------------------------------------------------------|
| rs1239269198 | intron_variant,upstream_transcript_variant,genic_upstream_transcript_variant                      |
| rs1239285418 | intron_variant                                                                                    |
| rs1239315770 | intron_variant                                                                                    |
| rs1239326673 | intron_variant,genic_upstream_transcript_variant                                                  |
| rs1239338337 | intron_variant,genic_upstream_transcript_variant                                                  |
| rs1239345327 | intron_variant                                                                                    |
| rs1239364505 | intron_variant,genic_upstream_transcript_variant                                                  |
| rs1239407310 | intron_variant,genic_upstream_transcript_variant                                                  |
| rs1239443054 | intron_variant,genic_upstream_transcript_variant                                                  |
| rs1239443930 | intron_variant                                                                                    |
| rs1239464800 | missense_variant,coding_sequence_variant,non_coding_transcript_variant                            |
| rs1239501260 | intron_variant,genic_upstream_transcript_variant                                                  |
| rs1239559354 | intron_variant                                                                                    |
| rs1239640523 | intron_variant,genic_upstream_transcript_variant                                                  |
| rs1239641665 | intron_variant                                                                                    |
| rs1239643960 | intron_variant,genic_downstream_transcript_variant                                                |
| rs1239658974 | intron_variant                                                                                    |
| rs1239659071 | intron_variant,genic_downstream_transcript_variant                                                |
| rs1239661289 | intron_variant,genic_upstream_transcript_variant                                                  |
| rs1239692748 | intron_variant                                                                                    |
| rs1239701531 | intron_variant,genic_upstream_transcript_variant                                                  |
| rs1239705581 | intron_variant                                                                                    |
| rs1239751029 | intron_variant,genic_upstream_transcript_variant                                                  |
| rs1239772560 | intron_variant,genic_upstream_transcript_variant                                                  |
| rs1239783995 | intron_variant,genic_upstream_transcript_variant                                                  |
| rs1239827390 | intron_variant                                                                                    |
| rs1239837205 | intron_variant                                                                                    |
| rs1239843462 | intron_variant,genic_downstream_transcript_variant                                                |
| rs1239876936 | intron_variant,genic_upstream_transcript_variant                                                  |
| rs1239961935 | intron_variant,genic_downstream_transcript_variant                                                |
| rs1239967692 | intron_variant,genic_upstream_transcript_variant                                                  |
| rs1239970077 | intron_variant                                                                                    |
| rs1239995564 | intron_variant                                                                                    |
| rs1240041843 | genic_downstream_transcript_variant,3_prime_UTR_variant,non_coding_transcript_variant             |
| rs1240044110 | intron_variant,genic_upstream_transcript_variant                                                  |
| rs1240050099 | intron_variant,genic_upstream_transcript_variant                                                  |
| rs1240054071 | intron_variant,genic_downstream_transcript_variant                                                |
| rs1240055274 | intron_variant                                                                                    |
| rs1240062915 | intron_variant,genic_downstream_transcript_variant                                                |
| rs1240073622 | upstream_transcript_variant,intron_variant,2KB_upstream_variant,genic_upstream_transcript_variant |
| rs1240124152 | intron_variant,upstream_transcript_variant,genic_upstream_transcript_variant                      |
| rs1240159233 | intron_variant,genic_upstream_transcript_variant                                                  |
| rs1240183703 | intron_variant                                                                                    |
| rs1240207858 | intron_variant,genic_upstream_transcript_variant                                                  |
| rs1240213404 | intron_variant                                                                                    |
| rs1240239236 | intron_variant,genic_upstream_transcript_variant                                                  |
| rs1240324571 | intron_variant,upstream_transcript_variant,genic_upstream_transcript_variant                      |
| rs1240336700 | intron_variant,genic_upstream_transcript_variant                                                  |
| rs1240353665 | intron_variant                                                                                    |
| rs1240401454 | intron_variant                                                                                    |
| rs1240402954 | intron_variant,genic_upstream_transcript_variant                                                  |
| rs1240416935 | intron_variant,genic_upstream_transcript_variant                                                  |
| rs1240429691 | intron_variant,genic_downstream_transcript_variant                                                |
| rs1240472114 | intron_variant,genic_upstream_transcript_variant                                                  |
| rs1240492636 | intron_variant,genic_upstream_transcript_variant                                                  |
| rs1240528334 | intron_variant,genic_downstream_transcript_variant                                                |
| rs1240546343 | intron_variant,upstream_transcript_variant,genic_upstream_transcript_variant                      |
| rs1240591603 | intron_variant,genic_upstream_transcript_variant                                                  |
| rs1240610557 | intron_variant,genic_upstream_transcript_variant                                                  |
| rs1240641815 | upstream_transcript_variant,intron_variant,2KB_upstream_variant,genic_upstream_transcript_variant |
| rs1240659674 | intron_variant                                                                                    |
| rs1240694645 | intron_variant,genic_downstream_transcript_variant                                                |
| rs1240712172 | intron_variant,genic_downstream_transcript_variant                                                |
| rs1240757549 | intron_variant,genic_upstream_transcript_variant                                                  |
| rs1240763462 | intron_variant,genic_upstream_transcript_variant                                                  |
| rs1240769804 | intron_variant,genic_upstream_transcript_variant                                                  |
| rs1240805675 | intron_variant                                                                                    |
| rs1240840582 | intron_variant,genic_upstream_transcript_variant                                                  |
| rs1240899031 | intron_variant                                                                                    |
| rs1240951833 | intron_variant,genic_downstream_transcript_variant                                                |
| rs1240962919 | intron_variant                                                                                    |
| rs1240996344 | intron_variant                                                                                    |
| rs1241024131 | intron_variant,genic_downstream_transcript_variant                                                |
| rs1241032768 | intron_variant,genic_upstream_transcript_variant                                                  |

|              |                                                                                                   |
|--------------|---------------------------------------------------------------------------------------------------|
| rs1241038941 | intron_variant,genic_upstream_transcript_variant                                                  |
| rs1241046010 | intron_variant,genic_upstream_transcript_variant                                                  |
| rs1241051905 | intron_variant                                                                                    |
| rs1241068747 | intron_variant                                                                                    |
| rs1241081246 | intron_variant,genic_upstream_transcript_variant                                                  |
| rs1241101284 | intron_variant,genic_downstream_transcript_variant                                                |
| rs1241137350 | intron_variant,genic_upstream_transcript_variant                                                  |
| rs1241159792 | intron_variant,genic_upstream_transcript_variant                                                  |
| rs1241171384 | intron_variant,genic_upstream_transcript_variant                                                  |
| rs1241211751 | intron_variant,genic_upstream_transcript_variant                                                  |
| rs1241215493 | intron_variant,genic_downstream_transcript_variant                                                |
| rs1241216726 | intron_variant,upstream_transcript_variant,2KB_upstream_variant,genic_upstream_transcript_variant |
| rs1241266420 | intron_variant,genic_upstream_transcript_variant                                                  |
| rs1241277246 | intron_variant                                                                                    |
| rs1241326221 | intron_variant                                                                                    |
| rs1241338160 | intron_variant,genic_downstream_transcript_variant                                                |
| rs1241342716 | intron_variant,genic_upstream_transcript_variant                                                  |
| rs1241357107 | intron_variant                                                                                    |
| rs1241364129 | intron_variant                                                                                    |
| rs1241366172 | intron_variant,genic_upstream_transcript_variant                                                  |
| rs1241452106 | intron_variant                                                                                    |
| rs1241465049 | intron_variant,genic_downstream_transcript_variant                                                |
| rs1241473498 | intron_variant                                                                                    |
| rs1241544907 | intron_variant,genic_downstream_transcript_variant                                                |
| rs1241548162 | intron_variant                                                                                    |
| rs1241559449 | intron_variant                                                                                    |
| rs1241589791 | intron_variant,genic_upstream_transcript_variant                                                  |
| rs1241624156 | intron_variant,genic_upstream_transcript_variant                                                  |
| rs1241649184 | upstream_transcript_variant,intron_variant,2KB_upstream_variant,genic_upstream_transcript_variant |
| rs1241666014 | intron_variant                                                                                    |
| rs1241667511 | intron_variant,upstream_transcript_variant,genic_upstream_transcript_variant                      |
| rs1241686709 | intron_variant,genic_upstream_transcript_variant                                                  |
| rs1241698955 | intron_variant,genic_downstream_transcript_variant                                                |
| rs1241747730 | intron_variant                                                                                    |
| rs1241765208 | upstream_transcript_variant,intron_variant,2KB_upstream_variant,genic_upstream_transcript_variant |
| rs1241804169 | intron_variant                                                                                    |
| rs1241875488 | intron_variant                                                                                    |
| rs1241895940 | intron_variant,genic_upstream_transcript_variant                                                  |
| rs1241908649 | upstream_transcript_variant,intron_variant,2KB_upstream_variant,genic_upstream_transcript_variant |
| rs1241965643 | intron_variant,genic_upstream_transcript_variant                                                  |
| rs1242002306 | intron_variant,genic_upstream_transcript_variant                                                  |
| rs1242004149 | intron_variant                                                                                    |
| rs1242039940 | intron_variant,genic_downstream_transcript_variant                                                |
| rs1242079368 | intron_variant                                                                                    |
| rs1242094186 | intron_variant,upstream_transcript_variant,2KB_upstream_variant,genic_upstream_transcript_variant |
| rs1242122235 | intron_variant,genic_upstream_transcript_variant                                                  |
| rs1242190172 | intron_variant,genic_upstream_transcript_variant                                                  |
| rs1242191088 | upstream_transcript_variant,intron_variant,2KB_upstream_variant,genic_upstream_transcript_variant |
| rs1242221055 | intron_variant                                                                                    |
| rs1242252663 | intron_variant,genic_upstream_transcript_variant                                                  |
| rs1242253316 | intron_variant,genic_upstream_transcript_variant                                                  |
| rs1242268921 | intron_variant                                                                                    |
| rs1242336178 | intron_variant,genic_upstream_transcript_variant                                                  |
| rs1242350412 | intron_variant,genic_upstream_transcript_variant                                                  |
| rs1242355593 | intron_variant,genic_upstream_transcript_variant                                                  |
| rs1242472268 | intron_variant                                                                                    |
| rs1242504420 | intron_variant,genic_upstream_transcript_variant                                                  |
| rs1242530690 | intron_variant,genic_upstream_transcript_variant                                                  |
| rs1242535875 | intron_variant,genic_upstream_transcript_variant                                                  |
| rs1242550608 | intron_variant,genic_upstream_transcript_variant                                                  |
| rs1242634687 | intron_variant,upstream_transcript_variant,genic_upstream_transcript_variant                      |
| rs1242757118 | intron_variant,genic_downstream_transcript_variant                                                |
| rs1242758089 | intron_variant,genic_upstream_transcript_variant                                                  |
| rs1242778605 | intron_variant,genic_upstream_transcript_variant                                                  |
| rs1242779381 | intron_variant,upstream_transcript_variant,genic_upstream_transcript_variant                      |
| rs1242792234 | intron_variant,genic_downstream_transcript_variant                                                |
| rs1242795641 | intron_variant,genic_upstream_transcript_variant                                                  |
| rs1242802428 | intron_variant,genic_upstream_transcript_variant                                                  |
| rs1242811908 | intron_variant,genic_downstream_transcript_variant                                                |
| rs1242814365 | intron_variant,upstream_transcript_variant,genic_upstream_transcript_variant                      |
| rs1242842266 | intron_variant                                                                                    |
| rs1242927603 | intron_variant,upstream_transcript_variant,2KB_upstream_variant,genic_upstream_transcript_variant |
| rs1242942858 | intron_variant,genic_downstream_transcript_variant                                                |
| rs1242953645 | intron_variant                                                                                    |

|              |                                                                                                               |
|--------------|---------------------------------------------------------------------------------------------------------------|
| rs1242974814 | intron_variant,genic_upstream_transcript_variant                                                              |
| rs1242990387 | intron_variant,genic_upstream_transcript_variant                                                              |
| rs1242999855 | intron_variant,genic_downstream_transcript_variant                                                            |
| rs1243091254 | intron_variant                                                                                                |
| rs1243179913 | intron_variant,genic_upstream_transcript_variant                                                              |
| rs1243190210 | intron_variant                                                                                                |
| rs1243233537 | intron_variant                                                                                                |
| rs1243246671 | intron_variant,genic_upstream_transcript_variant                                                              |
| rs1243269626 | intron_variant,genic_upstream_transcript_variant                                                              |
| rs1243304925 | intron_variant                                                                                                |
| rs1243310779 | intron_variant,genic_upstream_transcript_variant                                                              |
| rs1243331052 | upstream_transcript_variant,5_prime_UTR_variant,intron_variant,genic_upstream_transcript_variant              |
| rs1243340837 | intron_variant                                                                                                |
| rs1243374825 | intron_variant,upstream_transcript_variant,genic_upstream_transcript_variant                                  |
| rs1243408136 | intron_variant,genic_upstream_transcript_variant                                                              |
| rs1243440729 | intron_variant,genic_downstream_transcript_variant                                                            |
| rs1243454877 | intron_variant,genic_downstream_transcript_variant                                                            |
| rs1243466614 | intron_variant,genic_downstream_transcript_variant                                                            |
| rs1243515171 | intron_variant,genic_upstream_transcript_variant                                                              |
| rs1243538013 | intron_variant                                                                                                |
| rs1243543318 | genic_downstream_transcript_variant,terminator_codon_variant,synonymous_variant,non_coding_transcript_variant |
| rs1243589042 | intron_variant,genic_downstream_transcript_variant                                                            |
| rs1243592867 | intron_variant                                                                                                |
| rs1243648135 | intron_variant                                                                                                |
| rs1243669987 | intron_variant,genic_upstream_transcript_variant                                                              |
| rs1243671557 | intron_variant                                                                                                |
| rs1243679064 | intron_variant,genic_downstream_transcript_variant                                                            |
| rs1243706414 | intron_variant                                                                                                |
| rs1243708887 | intron_variant,genic_downstream_transcript_variant                                                            |
| rs1243742599 | intron_variant                                                                                                |
| rs1243757538 | intron_variant,genic_downstream_transcript_variant                                                            |
| rs1243809749 | intron_variant                                                                                                |
| rs1243812465 | intron_variant                                                                                                |
| rs1243814393 | intron_variant,genic_upstream_transcript_variant                                                              |
| rs1243841297 | intron_variant,genic_upstream_transcript_variant                                                              |
| rs1243877215 | intron_variant,genic_downstream_transcript_variant                                                            |
| rs1243879172 | intron_variant                                                                                                |
| rs1243920420 | intron_variant,genic_upstream_transcript_variant                                                              |
| rs1243933251 | intron_variant,genic_upstream_transcript_variant                                                              |
| rs1243950308 | intron_variant,genic_downstream_transcript_variant,downstream_transcript_variant                              |
| rs1243960466 | intron_variant,genic_downstream_transcript_variant                                                            |
| rs1243994445 | intron_variant,genic_downstream_transcript_variant                                                            |
| rs1243994799 | intron_variant,genic_upstream_transcript_variant                                                              |
| rs1244031166 | intron_variant,genic_upstream_transcript_variant                                                              |
| rs1244033869 | intron_variant,genic_downstream_transcript_variant                                                            |
| rs1244052789 | intron_variant,genic_upstream_transcript_variant                                                              |
| rs1244096375 | intron_variant,upstream_transcript_variant,2KB_upstream_variant,genic_upstream_transcript_variant             |
| rs1244120743 | intron_variant,genic_upstream_transcript_variant                                                              |
| rs1244143614 | intron_variant                                                                                                |
| rs1244147672 | intron_variant,genic_downstream_transcript_variant,downstream_transcript_variant                              |
| rs1244156630 | intron_variant                                                                                                |
| rs1244156923 | intron_variant                                                                                                |
| rs1244207504 | intron_variant                                                                                                |
| rs1244244280 | intron_variant                                                                                                |
| rs1244244368 | intron_variant,genic_downstream_transcript_variant                                                            |
| rs1244257057 | downstream_transcript_variant,500B_downstream_variant                                                         |
| rs1244316167 | intron_variant,genic_upstream_transcript_variant                                                              |
| rs1244359459 | intron_variant,genic_downstream_transcript_variant                                                            |
| rs1244367394 | intron_variant                                                                                                |
| rs1244406240 | intron_variant                                                                                                |
| rs1244472435 | intron_variant,genic_downstream_transcript_variant                                                            |
| rs1244472990 | intron_variant,genic_upstream_transcript_variant                                                              |
| rs1244484211 | intron_variant                                                                                                |
| rs1244518059 | intron_variant                                                                                                |
| rs1244574188 | downstream_transcript_variant,500B_downstream_variant                                                         |
| rs1244594882 | intron_variant,genic_upstream_transcript_variant                                                              |
| rs1244674641 | intron_variant,genic_upstream_transcript_variant                                                              |
| rs1244721967 | intron_variant,genic_downstream_transcript_variant                                                            |
| rs1244761688 | intron_variant                                                                                                |
| rs1244818772 | intron_variant                                                                                                |
| rs1244819755 | intron_variant,genic_upstream_transcript_variant                                                              |
| rs1244833624 | intron_variant                                                                                                |
| rs1244859141 | intron_variant                                                                                                |
| rs1244867478 | intron_variant                                                                                                |

|              |                                                                                                                         |
|--------------|-------------------------------------------------------------------------------------------------------------------------|
| rs1244956292 | intron_variant,genic_upstream_transcript_variant                                                                        |
| rs1244972425 | intron_variant,genic_upstream_transcript_variant                                                                        |
| rs1245039374 | intron_variant,genic_upstream_transcript_variant                                                                        |
| rs1245060818 | intron_variant                                                                                                          |
| rs1245062029 | intron_variant,genic_downstream_transcript_variant                                                                      |
| rs1245127838 | intron_variant                                                                                                          |
| rs1245142390 | intron_variant,genic_upstream_transcript_variant                                                                        |
| rs1245167046 | intron_variant                                                                                                          |
| rs1245240891 | intron_variant,upstream_transcript_variant,genic_upstream_transcript_variant                                            |
| rs1245247836 | intron_variant,genic_upstream_transcript_variant                                                                        |
| rs1245252905 | intron_variant,genic_upstream_transcript_variant                                                                        |
| rs1245289872 | intron_variant,genic_upstream_transcript_variant                                                                        |
| rs1245405703 | intron_variant,genic_downstream_transcript_variant                                                                      |
| rs1245417180 | intron_variant,genic_upstream_transcript_variant,non_coding_transcript_variant                                          |
| rs1245439491 | intron_variant,genic_downstream_transcript_variant                                                                      |
| rs1245495020 | intron_variant,genic_downstream_transcript_variant                                                                      |
| rs1245527574 | intron_variant                                                                                                          |
| rs1245578550 | intron_variant,upstream_transcript_variant,genic_upstream_transcript_variant                                            |
| rs1245608959 | intron_variant,genic_upstream_transcript_variant                                                                        |
| rs1245751303 | intron_variant                                                                                                          |
| rs1245763439 | intron_variant,genic_upstream_transcript_variant                                                                        |
| rs1245785485 | intron_variant                                                                                                          |
| rs1245804407 | intron_variant                                                                                                          |
| rs1245841003 | intron_variant,genic_downstream_transcript_variant                                                                      |
| rs1245856644 | intron_variant,genic_upstream_transcript_variant                                                                        |
| rs1245898130 | intron_variant,genic_upstream_transcript_variant                                                                        |
| rs1245899289 | intron_variant,upstream_transcript_variant,genic_upstream_transcript_variant                                            |
| rs1245903856 | intron_variant                                                                                                          |
| rs1245964675 | intron_variant,upstream_transcript_variant,2KB_upstream_variant,genic_upstream_transcript_variant                       |
| rs1246056172 | intron_variant                                                                                                          |
| rs1246059627 | intron_variant,genic_downstream_transcript_variant                                                                      |
| rs1246085531 | intron_variant                                                                                                          |
| rs1246094460 | missense_variant,coding_sequence_variant,non_coding_transcript_variant                                                  |
| rs1246096770 | intron_variant,upstream_transcript_variant,genic_upstream_transcript_variant                                            |
| rs1246148312 | genic_upstream_transcript_variant,intron_variant                                                                        |
| rs1246155653 | intron_variant                                                                                                          |
| rs1246169468 | intron_variant                                                                                                          |
| rs1246189397 | genic_upstream_transcript_variant,intron_variant                                                                        |
| rs1246232272 | genic_upstream_transcript_variant,intron_variant                                                                        |
| rs1246243243 | intron_variant                                                                                                          |
| rs1246257547 | genic_downstream_transcript_variant,intron_variant                                                                      |
| rs1246258794 | intron_variant                                                                                                          |
| rs1246268986 | genic_upstream_transcript_variant,intron_variant                                                                        |
| rs1246281148 | non_coding_transcript_variant,intron_variant,genic_upstream_transcript_variant,missense_variant,coding_sequence_variant |
| rs1246335812 | intron_variant                                                                                                          |
| rs1246338971 | genic_upstream_transcript_variant,intron_variant                                                                        |
| rs1246364158 | genic_upstream_transcript_variant,intron_variant                                                                        |
| rs1246387116 | intron_variant                                                                                                          |
| rs1246406545 | genic_downstream_transcript_variant,intron_variant                                                                      |
| rs1246430010 | intron_variant                                                                                                          |
| rs1246437165 | genic_upstream_transcript_variant,intron_variant                                                                        |
| rs1246447307 | 5_prime_UTR_variant,intron_variant                                                                                      |
| rs1246474413 | genic_downstream_transcript_variant,intron_variant                                                                      |
| rs1246477666 | genic_downstream_transcript_variant,intron_variant                                                                      |
| rs1246506337 | genic_downstream_transcript_variant,intron_variant                                                                      |
| rs1246535788 | genic_upstream_transcript_variant,intron_variant                                                                        |
| rs1246542966 | intron_variant                                                                                                          |
| rs1246550980 | intron_variant                                                                                                          |
| rs1246574762 | intron_variant                                                                                                          |
| rs1246578196 | intron_variant                                                                                                          |
| rs1246659131 | genic_upstream_transcript_variant,intron_variant                                                                        |
| rs1246668877 | genic_upstream_transcript_variant,intron_variant                                                                        |
| rs1246700027 | intron_variant                                                                                                          |
| rs1246723457 | non_coding_transcript_variant,3_prime_UTR_variant,genic_downstream_transcript_variant                                   |
| rs1246737295 | upstream_transcript_variant,genic_upstream_transcript_variant,intron_variant                                            |
| rs1246738341 | genic_upstream_transcript_variant,intron_variant                                                                        |
| rs1246740315 | genic_upstream_transcript_variant,intron_variant                                                                        |
| rs1246841572 | genic_downstream_transcript_variant,intron_variant                                                                      |
| rs1246856635 | intron_variant                                                                                                          |
| rs1246861763 | non_coding_transcript_variant,intron_variant,genic_upstream_transcript_variant,missense_variant,coding_sequence_variant |
| rs1246863396 | downstream_transcript_variant,genic_downstream_transcript_variant,intron_variant                                        |
| rs1246922287 | non_coding_transcript_variant,3_prime_UTR_variant,genic_downstream_transcript_variant                                   |
| rs1246968996 | intron_variant                                                                                                          |
| rs1247000152 | non_coding_transcript_variant,3_prime_UTR_variant,genic_downstream_transcript_variant                                   |

|              |                                                                                                                         |
|--------------|-------------------------------------------------------------------------------------------------------------------------|
| rs1247049705 | intron_variant                                                                                                          |
| rs1247050595 | intron_variant                                                                                                          |
| rs1247053898 | genic_upstream_transcript_variant,intron_variant                                                                        |
| rs1247059282 | genic_upstream_transcript_variant,intron_variant                                                                        |
| rs1247082215 | genic_downstream_transcript_variant,intron_variant                                                                      |
| rs1247095935 | genic_upstream_transcript_variant,intron_variant                                                                        |
| rs1247100626 | downstream_transcript_variant,genic_downstream_transcript_variant,intron_variant                                        |
| rs1247108719 | intron_variant                                                                                                          |
| rs1247118703 | genic_downstream_transcript_variant,intron_variant                                                                      |
| rs1247168154 | genic_upstream_transcript_variant,intron_variant                                                                        |
| rs1247188385 | genic_upstream_transcript_variant,intron_variant                                                                        |
| rs1247191290 | genic_upstream_transcript_variant,intron_variant                                                                        |
| rs1247227893 | upstream_transcript_variant,2KB_upstream_variant,genic_upstream_transcript_variant,intron_variant                       |
| rs1247248031 | upstream_transcript_variant,genic_upstream_transcript_variant,intron_variant                                            |
| rs1247257946 | intron_variant                                                                                                          |
| rs1247271392 | genic_upstream_transcript_variant,intron_variant                                                                        |
| rs1247326540 | intron_variant                                                                                                          |
| rs1247345002 | downstream_transcript_variant,genic_downstream_transcript_variant,intron_variant                                        |
| rs1247380258 | intron_variant                                                                                                          |
| rs1247434919 | genic_upstream_transcript_variant,intron_variant                                                                        |
| rs1247437750 | intron_variant                                                                                                          |
| rs1247449885 | intron_variant                                                                                                          |
| rs1247453898 | intron_variant                                                                                                          |
| rs1247463386 | genic_upstream_transcript_variant,intron_variant                                                                        |
| rs1247527345 | genic_upstream_transcript_variant,intron_variant                                                                        |
| rs1247563458 | intron_variant                                                                                                          |
| rs1247587739 | genic_upstream_transcript_variant,intron_variant                                                                        |
| rs1247607392 | genic_upstream_transcript_variant,intron_variant                                                                        |
| rs1247623978 | intron_variant                                                                                                          |
| rs1247646572 | genic_upstream_transcript_variant,intron_variant                                                                        |
| rs1247695567 | genic_upstream_transcript_variant,intron_variant                                                                        |
| rs1247715144 | intron_variant                                                                                                          |
| rs1247718119 | intron_variant                                                                                                          |
| rs1247750099 | non_coding_transcript_variant,intron_variant,genic_upstream_transcript_variant,missense_variant,coding_sequence_variant |
| rs1247779257 | genic_downstream_transcript_variant,intron_variant                                                                      |
| rs1247873497 | genic_upstream_transcript_variant,intron_variant                                                                        |
| rs1247897232 | genic_downstream_transcript_variant,intron_variant                                                                      |
| rs1247971041 | intron_variant                                                                                                          |
| rs1247976272 | genic_downstream_transcript_variant,intron_variant                                                                      |
| rs1247978535 | genic_upstream_transcript_variant,intron_variant                                                                        |
| rs1247989872 | genic_downstream_transcript_variant,intron_variant                                                                      |
| rs1248004024 | non_coding_transcript_variant,synonymous_variant,coding_sequence_variant                                                |
| rs1248026146 | genic_upstream_transcript_variant,intron_variant                                                                        |
| rs1248128378 | upstream_transcript_variant,2KB_upstream_variant,genic_upstream_transcript_variant,intron_variant                       |
| rs1248129894 | genic_upstream_transcript_variant,intron_variant                                                                        |
| rs1248160728 | intron_variant                                                                                                          |
| rs1248176452 | intron_variant                                                                                                          |
| rs1248182985 | intron_variant                                                                                                          |
| rs1248202249 | genic_upstream_transcript_variant,intron_variant                                                                        |
| rs1248209070 | frameshift_variant,coding_sequence_variant,intron_variant                                                               |
| rs1248223065 | genic_upstream_transcript_variant,intron_variant                                                                        |
| rs1248285770 | intron_variant                                                                                                          |
| rs1248304212 | genic_upstream_transcript_variant,intron_variant                                                                        |
| rs1248322106 | genic_upstream_transcript_variant,intron_variant                                                                        |
| rs1248335861 | genic_upstream_transcript_variant,intron_variant                                                                        |
| rs1248342501 | intron_variant                                                                                                          |
| rs1248385547 | genic_upstream_transcript_variant,intron_variant                                                                        |
| rs1248428905 | genic_upstream_transcript_variant,intron_variant                                                                        |
| rs1248504576 | genic_downstream_transcript_variant,intron_variant                                                                      |
| rs1248526746 | genic_upstream_transcript_variant,intron_variant                                                                        |
| rs1248624760 | upstream_transcript_variant,genic_upstream_transcript_variant,intron_variant                                            |
| rs1248645608 | genic_upstream_transcript_variant,intron_variant                                                                        |
| rs1248651171 | genic_downstream_transcript_variant,intron_variant                                                                      |
| rs1248664255 | genic_upstream_transcript_variant,intron_variant                                                                        |
| rs1248685739 | intron_variant                                                                                                          |
| rs1248757632 | genic_upstream_transcript_variant,intron_variant                                                                        |
| rs1248781445 | intron_variant                                                                                                          |
| rs1248815067 | intron_variant                                                                                                          |
| rs1248848645 | genic_downstream_transcript_variant,intron_variant                                                                      |
| rs1248851448 | genic_upstream_transcript_variant,intron_variant                                                                        |
| rs1248891973 | genic_upstream_transcript_variant,intron_variant                                                                        |
| rs1248906887 | intron_variant                                                                                                          |
| rs1248907991 | intron_variant                                                                                                          |
| rs1248931356 | genic_upstream_transcript_variant,intron_variant                                                                        |

|              |                                                                                                                         |
|--------------|-------------------------------------------------------------------------------------------------------------------------|
| rs1248942555 | genic_upstream_transcript_variant,intron_variant                                                                        |
| rs1248945324 | intron_variant                                                                                                          |
| rs1248965058 | intron_variant                                                                                                          |
| rs1249017576 | non_coding_transcript_variant,3_prime_UTR_variant,genic_downstream_transcript_variant                                   |
| rs1249031278 | intron_variant                                                                                                          |
| rs1249038754 | intron_variant                                                                                                          |
| rs1249049357 | intron_variant                                                                                                          |
| rs1249066509 | upstream_transcript_variant,genic_upstream_transcript_variant,intron_variant                                            |
| rs1249067598 | genic_upstream_transcript_variant,intron_variant                                                                        |
| rs1249122151 | intron_variant                                                                                                          |
| rs1249127459 | genic_upstream_transcript_variant,intron_variant                                                                        |
| rs1249129656 | genic_upstream_transcript_variant,intron_variant                                                                        |
| rs1249130635 | genic_downstream_transcript_variant,intron_variant                                                                      |
| rs1249131139 | intron_variant                                                                                                          |
| rs1249151756 | genic_upstream_transcript_variant,intron_variant                                                                        |
| rs1249158950 | intron_variant                                                                                                          |
| rs1249186892 | genic_upstream_transcript_variant,intron_variant                                                                        |
| rs1249241492 | genic_upstream_transcript_variant,intron_variant                                                                        |
| rs1249253912 | genic_upstream_transcript_variant,intron_variant                                                                        |
| rs1249266190 | intron_variant                                                                                                          |
| rs1249279188 | genic_upstream_transcript_variant,intron_variant                                                                        |
| rs1249287547 | genic_upstream_transcript_variant,intron_variant                                                                        |
| rs1249355694 | genic_upstream_transcript_variant,intron_variant                                                                        |
| rs1249371062 | non_coding_transcript_variant,intron_variant,genic_upstream_transcript_variant,missense_variant,coding_sequence_variant |
| rs1249386826 | intron_variant                                                                                                          |
| rs1249389374 | genic_upstream_transcript_variant,intron_variant                                                                        |
| rs1249452450 | genic_upstream_transcript_variant,intron_variant                                                                        |
| rs1249460956 | genic_upstream_transcript_variant,intron_variant                                                                        |
| rs1249480381 | genic_upstream_transcript_variant,intron_variant                                                                        |
| rs1249561527 | genic_upstream_transcript_variant,intron_variant                                                                        |
| rs1249619506 | intron_variant                                                                                                          |
| rs1249634253 | genic_downstream_transcript_variant,intron_variant                                                                      |
| rs1249644070 | intron_variant                                                                                                          |
| rs1249703413 | genic_upstream_transcript_variant,intron_variant                                                                        |
| rs1249706800 | genic_downstream_transcript_variant,intron_variant                                                                      |
| rs1249710422 | genic_upstream_transcript_variant,intron_variant                                                                        |
| rs1249739995 | non_coding_transcript_variant,terminator_codon_variant,stop_lost,genic_downstream_transcript_variant                    |
| rs1249826648 | genic_upstream_transcript_variant,intron_variant                                                                        |
| rs1249828435 | genic_downstream_transcript_variant,intron_variant                                                                      |
| rs1249835679 | genic_downstream_transcript_variant,intron_variant                                                                      |
| rs1249842113 | genic_downstream_transcript_variant,intron_variant                                                                      |
| rs1249846868 | genic_downstream_transcript_variant,intron_variant                                                                      |
| rs1249900741 | genic_upstream_transcript_variant,intron_variant                                                                        |
| rs1249911409 | genic_downstream_transcript_variant,intron_variant                                                                      |
| rs1249917723 | genic_upstream_transcript_variant,intron_variant                                                                        |
| rs1249921143 | intron_variant                                                                                                          |
| rs1249958152 | intron_variant                                                                                                          |
| rs1249974533 | genic_upstream_transcript_variant,intron_variant                                                                        |
| rs1249995422 | intron_variant                                                                                                          |
| rs1250003744 | intron_variant                                                                                                          |
| rs1250011901 | genic_upstream_transcript_variant,intron_variant                                                                        |
| rs1250033877 | 5_prime_UTR_variant,intron_variant                                                                                      |
| rs1250057707 | genic_upstream_transcript_variant,intron_variant                                                                        |
| rs1250111869 | intron_variant,2KB_upstream_variant,genic_upstream_transcript_variant,upstream_transcript_variant                       |
| rs1250199038 | genic_upstream_transcript_variant,intron_variant                                                                        |
| rs1250227693 | intron_variant                                                                                                          |
| rs1250231374 | genic_upstream_transcript_variant,intron_variant                                                                        |
| rs1250268061 | intron_variant                                                                                                          |
| rs1250344565 | genic_downstream_transcript_variant,intron_variant                                                                      |
| rs1250378386 | intron_variant                                                                                                          |
| rs1250424137 | genic_upstream_transcript_variant,intron_variant                                                                        |
| rs1250495610 | intron_variant                                                                                                          |
| rs1250529984 | intron_variant                                                                                                          |
| rs1250577192 | genic_upstream_transcript_variant,intron_variant                                                                        |
| rs1250596944 | intron_variant                                                                                                          |
| rs1250608741 | genic_upstream_transcript_variant,intron_variant                                                                        |
| rs1250623222 | genic_upstream_transcript_variant,intron_variant                                                                        |
| rs1250623264 | intron_variant                                                                                                          |
| rs1250638401 | genic_upstream_transcript_variant,intron_variant                                                                        |
| rs1250699243 | genic_upstream_transcript_variant,intron_variant                                                                        |
| rs1250715249 | genic_upstream_transcript_variant,intron_variant                                                                        |
| rs1250717856 | genic_downstream_transcript_variant,intron_variant                                                                      |
| rs1250779402 | genic_downstream_transcript_variant,intron_variant                                                                      |
| rs1250782030 | genic_upstream_transcript_variant,intron_variant                                                                        |

|              |                                                                                                   |
|--------------|---------------------------------------------------------------------------------------------------|
| rs1250817714 | intron_variant                                                                                    |
| rs1250868411 | non_coding_transcript_variant,synonymous_variant,coding_sequence_variant                          |
| rs1250876544 | intron_variant                                                                                    |
| rs1250883463 | genic_downstream_transcript_variant,intron_variant                                                |
| rs1250885143 | genic_upstream_transcript_variant,intron_variant                                                  |
| rs1250937145 | intron_variant                                                                                    |
| rs1250956651 | genic_upstream_transcript_variant,intron_variant                                                  |
| rs1251033507 | intron_variant,2KB_upstream_variant,genic_upstream_transcript_variant,upstream_transcript_variant |
| rs1251052402 | non_coding_transcript_variant,3_prime_UTR_variant,genic_downstream_transcript_variant             |
| rs1251127060 | genic_downstream_transcript_variant,intron_variant                                                |
| rs1251172893 | genic_downstream_transcript_variant,intron_variant                                                |
| rs1251204601 | genic_downstream_transcript_variant,intron_variant                                                |
| rs1251206482 | downstream_transcript_variant,500B_downstream_variant                                             |
| rs1251217396 | intron_variant                                                                                    |
| rs1251221777 | genic_upstream_transcript_variant,intron_variant                                                  |
| rs1251315558 | intron_variant                                                                                    |
| rs1251327113 | intron_variant                                                                                    |
| rs1251433924 | genic_upstream_transcript_variant,intron_variant                                                  |
| rs1251521242 | intron_variant                                                                                    |
| rs1251532738 | intron_variant                                                                                    |
| rs1251616628 | genic_upstream_transcript_variant,intron_variant                                                  |
| rs1251634173 | genic_upstream_transcript_variant,intron_variant                                                  |
| rs1251647299 | genic_upstream_transcript_variant,intron_variant                                                  |
| rs1251665860 | intron_variant                                                                                    |
| rs1251701514 | genic_downstream_transcript_variant,intron_variant                                                |
| rs1251728273 | genic_downstream_transcript_variant,intron_variant                                                |
| rs1251746339 | genic_upstream_transcript_variant,intron_variant                                                  |
| rs1251814057 | genic_downstream_transcript_variant,intron_variant                                                |
| rs1251830845 | genic_downstream_transcript_variant,intron_variant                                                |
| rs1251896821 | genic_upstream_transcript_variant,intron_variant                                                  |
| rs1251920329 | genic_downstream_transcript_variant,intron_variant                                                |
| rs1251924604 | intron_variant                                                                                    |
| rs1251928541 | genic_upstream_transcript_variant,intron_variant                                                  |
| rs1251972255 | non_coding_transcript_variant,3_prime_UTR_variant,genic_downstream_transcript_variant             |
| rs1251984060 | genic_upstream_transcript_variant,intron_variant                                                  |
| rs1252018592 | intron_variant                                                                                    |
| rs1252048626 | intron_variant                                                                                    |
| rs1252082066 | genic_upstream_transcript_variant,intron_variant                                                  |
| rs1252132617 | genic_upstream_transcript_variant,intron_variant                                                  |
| rs1252150202 | genic_downstream_transcript_variant,intron_variant                                                |
| rs1252161749 | intron_variant                                                                                    |
| rs1252217722 | intron_variant                                                                                    |
| rs1252220390 | genic_upstream_transcript_variant,intron_variant                                                  |
| rs1252220941 | genic_upstream_transcript_variant,intron_variant                                                  |
| rs1252223710 | intron_variant                                                                                    |
| rs1252292829 | intron_variant                                                                                    |
| rs1252304350 | genic_upstream_transcript_variant,intron_variant                                                  |
| rs1252334252 | genic_downstream_transcript_variant,intron_variant                                                |
| rs1252335077 | intron_variant                                                                                    |
| rs1252350977 | intron_variant                                                                                    |
| rs1252391684 | genic_upstream_transcript_variant,intron_variant                                                  |
| rs1252405183 | intron_variant                                                                                    |
| rs1252430332 | genic_upstream_transcript_variant,intron_variant                                                  |
| rs1252493910 | genic_upstream_transcript_variant,intron_variant                                                  |
| rs1252495356 | intron_variant                                                                                    |
| rs1252510349 | genic_upstream_transcript_variant,intron_variant                                                  |
| rs1252519002 | intron_variant                                                                                    |
| rs1252534978 | intron_variant                                                                                    |
| rs1252547178 | downstream_transcript_variant,500B_downstream_variant                                             |
| rs1252548856 | genic_downstream_transcript_variant,intron_variant                                                |
| rs1252550524 | intron_variant                                                                                    |
| rs1252558021 | genic_upstream_transcript_variant,intron_variant                                                  |
| rs1252597448 | genic_downstream_transcript_variant,intron_variant                                                |
| rs1252603861 | intron_variant                                                                                    |
| rs1252644328 | genic_upstream_transcript_variant,intron_variant                                                  |
| rs1252649634 | non_coding_transcript_variant,3_prime_UTR_variant,genic_downstream_transcript_variant             |
| rs1252650433 | intron_variant                                                                                    |
| rs1252666974 | genic_upstream_transcript_variant,intron_variant                                                  |
| rs1252669700 | downstream_transcript_variant,genic_downstream_transcript_variant,intron_variant                  |
| rs1252670221 | genic_upstream_transcript_variant,intron_variant                                                  |
| rs1252673021 | intron_variant,2KB_upstream_variant,genic_upstream_transcript_variant,upstream_transcript_variant |
| rs1252706945 | genic_downstream_transcript_variant,intron_variant                                                |
| rs1252721086 | upstream_transcript_variant,genic_upstream_transcript_variant,intron_variant                      |
| rs1252728850 | intron_variant                                                                                    |

|              |                                                                                                   |
|--------------|---------------------------------------------------------------------------------------------------|
| rs1252750802 | upstream_transcript_variant,2KB_upstream_variant,genic_upstream_transcript_variant,intron_variant |
| rs1252758173 | genic_upstream_transcript_variant,intron_variant                                                  |
| rs1252791293 | genic_upstream_transcript_variant,intron_variant                                                  |
| rs1252807478 | genic_upstream_transcript_variant,intron_variant                                                  |
| rs1252947198 | genic_upstream_transcript_variant,intron_variant                                                  |
| rs1252957974 | intron_variant                                                                                    |
| rs1252959557 | intron_variant                                                                                    |
| rs1252968703 | intron_variant                                                                                    |
| rs1252970686 | intron_variant                                                                                    |
| rs1252973748 | genic_upstream_transcript_variant,intron_variant                                                  |
| rs1252999025 | genic_upstream_transcript_variant,intron_variant                                                  |
| rs1252999648 | intron_variant,2KB_upstream_variant,genic_upstream_transcript_variant,upstream_transcript_variant |
| rs1253007078 | genic_upstream_transcript_variant,intron_variant                                                  |
| rs1253024374 | genic_downstream_transcript_variant,intron_variant                                                |
| rs1253077547 | genic_upstream_transcript_variant,intron_variant                                                  |
| rs1253077816 | intron_variant                                                                                    |
| rs1253092794 | upstream_transcript_variant,genic_upstream_transcript_variant,intron_variant                      |
| rs1253139441 | genic_upstream_transcript_variant,intron_variant                                                  |
| rs1253171578 | intron_variant                                                                                    |
| rs1253186200 | upstream_transcript_variant,genic_upstream_transcript_variant,intron_variant                      |
| rs1253200284 | intron_variant                                                                                    |
| rs1253211360 | intron_variant                                                                                    |
| rs1253229197 | intron_variant                                                                                    |
| rs1253244386 | upstream_transcript_variant,genic_upstream_transcript_variant,intron_variant                      |
| rs1253262900 | genic_downstream_transcript_variant,intron_variant                                                |
| rs1253278690 | intron_variant                                                                                    |
| rs1253302545 | genic_downstream_transcript_variant,intron_variant                                                |
| rs1253336512 | intron_variant                                                                                    |
| rs1253403984 | genic_upstream_transcript_variant,intron_variant                                                  |
| rs1253411803 | intron_variant                                                                                    |
| rs1253413251 | intron_variant                                                                                    |
| rs1253425235 | intron_variant                                                                                    |
| rs1253443305 | intron_variant                                                                                    |
| rs1253465718 | genic_upstream_transcript_variant,intron_variant                                                  |
| rs1253468643 | intron_variant                                                                                    |
| rs1253474228 | intron_variant                                                                                    |
| rs1253485771 | genic_downstream_transcript_variant,intron_variant                                                |
| rs1253526590 | genic_downstream_transcript_variant,intron_variant                                                |
| rs1253559144 | genic_upstream_transcript_variant,intron_variant                                                  |
| rs1253603006 | intron_variant                                                                                    |
| rs1253613792 | genic_upstream_transcript_variant,intron_variant                                                  |
| rs1253614566 | intron_variant                                                                                    |
| rs1253640290 | genic_upstream_transcript_variant,intron_variant                                                  |
| rs1253653570 | intron_variant                                                                                    |
| rs1253675900 | genic_downstream_transcript_variant,intron_variant                                                |
| rs1253722469 | intron_variant                                                                                    |
| rs1253747931 | intron_variant                                                                                    |
| rs1253799789 | genic_downstream_transcript_variant,intron_variant                                                |
| rs1253819490 | intron_variant                                                                                    |
| rs1253860544 | intron_variant                                                                                    |
| rs1253868847 | intron_variant                                                                                    |
| rs1253894496 | non_coding_transcript_variant,missense_variant,coding_sequence_variant                            |
| rs1253933109 | genic_upstream_transcript_variant,intron_variant                                                  |
| rs1253934855 | genic_upstream_transcript_variant,intron_variant                                                  |
| rs1253945981 | genic_downstream_transcript_variant,intron_variant                                                |
| rs1253962831 | genic_upstream_transcript_variant,intron_variant                                                  |
| rs1253974728 | intron_variant                                                                                    |
| rs1253985996 | intron_variant                                                                                    |
| rs1253990061 | intron_variant                                                                                    |
| rs1254025252 | genic_downstream_transcript_variant,intron_variant                                                |
| rs1254056436 | genic_upstream_transcript_variant,intron_variant                                                  |
| rs1254071485 | intron_variant                                                                                    |
| rs1254090807 | genic_upstream_transcript_variant,intron_variant                                                  |
| rs1254171826 | genic_upstream_transcript_variant,intron_variant                                                  |
| rs1254215342 | intron_variant                                                                                    |
| rs1254248620 | intron_variant                                                                                    |
| rs1254259667 | intron_variant                                                                                    |
| rs1254268734 | genic_upstream_transcript_variant,intron_variant                                                  |
| rs1254288799 | intron_variant                                                                                    |
| rs1254296852 | genic_upstream_transcript_variant,intron_variant                                                  |
| rs1254313884 | genic_downstream_transcript_variant,intron_variant                                                |
| rs1254395342 | intron_variant                                                                                    |
| rs1254407302 | intron_variant                                                                                    |
| rs1254439890 | intron_variant                                                                                    |

|              |                                                                                                                           |
|--------------|---------------------------------------------------------------------------------------------------------------------------|
| rs1254539419 | genic_upstream_transcript_variant,intron_variant                                                                          |
| rs1254566448 | intron_variant                                                                                                            |
| rs1254604697 | intron_variant                                                                                                            |
| rs1254638714 | non_coding_transcript_variant,intron_variant,genic_upstream_transcript_variant,coding_sequence_variant,synonymous_variant |
| rs1254672049 | genic_upstream_transcript_variant,intron_variant                                                                          |
| rs1254697440 | genic_downstream_transcript_variant,intron_variant                                                                        |
| rs1254707965 | non_coding_transcript_variant,intron_variant,genic_upstream_transcript_variant,missense_variant,coding_sequence_variant   |
| rs1254719560 | non_coding_transcript_variant,intron_variant,genic_upstream_transcript_variant,missense_variant,coding_sequence_variant   |
| rs1254723357 | intron_variant                                                                                                            |
| rs1254781638 | genic_upstream_transcript_variant,intron_variant                                                                          |
| rs1254792647 | intron_variant                                                                                                            |
| rs1254835503 | genic_downstream_transcript_variant,intron_variant                                                                        |
| rs1254883315 | genic_upstream_transcript_variant,intron_variant                                                                          |
| rs1254893347 | genic_upstream_transcript_variant,intron_variant                                                                          |
| rs1254906707 | intron_variant                                                                                                            |
| rs1254932832 | intron_variant                                                                                                            |
| rs1254992922 | genic_upstream_transcript_variant,intron_variant                                                                          |
| rs1255004413 | intron_variant                                                                                                            |
| rs1255010679 | genic_upstream_transcript_variant,intron_variant                                                                          |
| rs1255035188 | genic_upstream_transcript_variant,intron_variant                                                                          |
| rs1255052661 | genic_upstream_transcript_variant,intron_variant                                                                          |
| rs1255087036 | intron_variant                                                                                                            |
| rs1255093222 | genic_upstream_transcript_variant,intron_variant                                                                          |
| rs1255096350 | genic_upstream_transcript_variant,intron_variant                                                                          |
| rs1255125045 | genic_downstream_transcript_variant,intron_variant                                                                        |
| rs1255171543 | genic_downstream_transcript_variant,intron_variant                                                                        |
| rs1255179807 | genic_upstream_transcript_variant,intron_variant                                                                          |
| rs1255185058 | non_coding_transcript_variant,missense_variant,genic_downstream_transcript_variant,coding_sequence_variant                |
| rs1255233104 | intron_variant                                                                                                            |
| rs1255243283 | intron_variant                                                                                                            |
| rs1255299009 | intron_variant                                                                                                            |
| rs1255306147 | genic_downstream_transcript_variant,intron_variant                                                                        |
| rs1255309756 | intron_variant                                                                                                            |
| rs1255445254 | genic_downstream_transcript_variant,intron_variant                                                                        |
| rs1255471934 | genic_upstream_transcript_variant,intron_variant                                                                          |
| rs1255497343 | genic_upstream_transcript_variant,intron_variant                                                                          |
| rs1255558682 | genic_upstream_transcript_variant,intron_variant                                                                          |
| rs1255637586 | intron_variant                                                                                                            |
| rs1255652323 | genic_upstream_transcript_variant,intron_variant                                                                          |
| rs1255666549 | genic_downstream_transcript_variant,intron_variant                                                                        |
| rs1255713239 | intron_variant                                                                                                            |
| rs1255757299 | genic_upstream_transcript_variant,intron_variant                                                                          |
| rs1255776297 | genic_downstream_transcript_variant,intron_variant                                                                        |
| rs1255800063 | genic_upstream_transcript_variant,intron_variant                                                                          |
| rs1255812296 | genic_upstream_transcript_variant,intron_variant                                                                          |
| rs1255832364 | genic_upstream_transcript_variant,intron_variant                                                                          |
| rs1255858403 | genic_upstream_transcript_variant,intron_variant                                                                          |
| rs1255883868 | intron_variant                                                                                                            |
| rs1255904443 | upstream_transcript_variant,2KB_upstream_variant,genic_upstream_transcript_variant,intron_variant                         |
| rs1255952729 | upstream_transcript_variant,genic_upstream_transcript_variant,intron_variant                                              |
| rs1255958255 | genic_upstream_transcript_variant,intron_variant                                                                          |
| rs1255959599 | genic_upstream_transcript_variant,intron_variant                                                                          |
| rs1255991317 | genic_upstream_transcript_variant,intron_variant                                                                          |
| rs1256017810 | genic_downstream_transcript_variant,intron_variant                                                                        |
| rs1256040061 | genic_upstream_transcript_variant,intron_variant                                                                          |
| rs1256063601 | genic_upstream_transcript_variant,intron_variant                                                                          |
| rs1256114756 | intron_variant                                                                                                            |
| rs1256119820 | genic_downstream_transcript_variant,intron_variant                                                                        |
| rs1256121742 | genic_upstream_transcript_variant,intron_variant                                                                          |
| rs1256150784 | genic_upstream_transcript_variant,intron_variant                                                                          |
| rs1256176208 | genic_upstream_transcript_variant,intron_variant                                                                          |
| rs1256190349 | genic_downstream_transcript_variant,intron_variant                                                                        |
| rs1256226583 | upstream_transcript_variant,genic_upstream_transcript_variant,intron_variant                                              |
| rs1256233370 | intron_variant                                                                                                            |
| rs1256274602 | intron_variant                                                                                                            |
| rs1256337863 | intron_variant,2KB_upstream_variant,genic_upstream_transcript_variant,upstream_transcript_variant                         |
| rs1256344522 | intron_variant                                                                                                            |
| rs1256391739 | genic_upstream_transcript_variant,intron_variant                                                                          |
| rs1256425988 | non_coding_transcript_variant,missense_variant,genic_downstream_transcript_variant,coding_sequence_variant                |
| rs1256449467 | upstream_transcript_variant,genic_upstream_transcript_variant,intron_variant                                              |
| rs1256472069 | intron_variant                                                                                                            |
| rs1256537145 | genic_downstream_transcript_variant,intron_variant                                                                        |
| rs1256540242 | intron_variant                                                                                                            |
| rs1256586537 | genic_upstream_transcript_variant,intron_variant                                                                          |

|              |                                                                                                                         |
|--------------|-------------------------------------------------------------------------------------------------------------------------|
| rs1256607494 | intron_variant                                                                                                          |
| rs1256638571 | intron_variant                                                                                                          |
| rs1256645640 | genic_upstream_transcript_variant,intron_variant                                                                        |
| rs1256668487 | upstream_transcript_variant,genic_upstream_transcript_variant,intron_variant                                            |
| rs1256673892 | genic_upstream_transcript_variant,intron_variant                                                                        |
| rs1256682723 | intron_variant,2KB_upstream_variant,genic_upstream_transcript_variant,upstream_transcript_variant                       |
| rs1256693498 | genic_upstream_transcript_variant,intron_variant                                                                        |
| rs1256710095 | intron_variant                                                                                                          |
| rs1256711038 | non_coding_transcript_variant,intron_variant,genic_upstream_transcript_variant,missense_variant,coding_sequence_variant |
| rs1256720573 | genic_upstream_transcript_variant,intron_variant                                                                        |
| rs1256728074 | intron_variant                                                                                                          |
| rs1256729427 | genic_upstream_transcript_variant,intron_variant                                                                        |
| rs1256761667 | genic_downstream_transcript_variant,intron_variant                                                                      |
| rs1256777568 | intron_variant                                                                                                          |
| rs1256817092 | upstream_transcript_variant,2KB_upstream_variant,genic_upstream_transcript_variant,intron_variant                       |
| rs1256889016 | genic_upstream_transcript_variant,intron_variant                                                                        |
| rs1256920012 | genic_upstream_transcript_variant,intron_variant                                                                        |
| rs1256949694 | genic_upstream_transcript_variant,intron_variant                                                                        |
| rs1256991986 | genic_upstream_transcript_variant,intron_variant                                                                        |
| rs1256995654 | intron_variant                                                                                                          |
| rs1257003785 | genic_upstream_transcript_variant,intron_variant                                                                        |
| rs1257061539 | genic_downstream_transcript_variant,intron_variant                                                                      |
| rs1257156444 | intron_variant                                                                                                          |
| rs1257179733 | genic_upstream_transcript_variant,intron_variant                                                                        |
| rs1257190383 | genic_upstream_transcript_variant,intron_variant                                                                        |
| rs1257213734 | genic_downstream_transcript_variant,intron_variant                                                                      |
| rs1257243306 | genic_downstream_transcript_variant,intron_variant                                                                      |
| rs1257264066 | genic_upstream_transcript_variant,intron_variant                                                                        |
| rs1257277589 | upstream_transcript_variant,2KB_upstream_variant,genic_upstream_transcript_variant,intron_variant                       |
| rs1257347653 | intron_variant                                                                                                          |
| rs1257362501 | intron_variant                                                                                                          |
| rs1257371417 | intron_variant                                                                                                          |
| rs1257393817 | intron_variant                                                                                                          |
| rs1257414540 | intron_variant                                                                                                          |
| rs1257460478 | intron_variant                                                                                                          |
| rs1257517606 | genic_upstream_transcript_variant,intron_variant                                                                        |
| rs1257522365 | genic_downstream_transcript_variant,intron_variant                                                                      |
| rs1257543439 | genic_downstream_transcript_variant,intron_variant                                                                      |
| rs1257544932 | intron_variant                                                                                                          |
| rs1257556323 | genic_downstream_transcript_variant,intron_variant                                                                      |
| rs1257573318 | intron_variant                                                                                                          |
| rs1257594734 | genic_upstream_transcript_variant,intron_variant                                                                        |
| rs1257606547 | intron_variant                                                                                                          |
| rs1257622227 | genic_downstream_transcript_variant,intron_variant                                                                      |
| rs1257643147 | upstream_transcript_variant,genic_upstream_transcript_variant,intron_variant                                            |
| rs1257647207 | missense_variant,coding_sequence_variant,intron_variant                                                                 |
| rs1257681798 | genic_upstream_transcript_variant,intron_variant                                                                        |
| rs1257719210 | genic_upstream_transcript_variant,intron_variant                                                                        |
| rs1257724789 | genic_upstream_transcript_variant,intron_variant                                                                        |
| rs1257799607 | intron_variant                                                                                                          |
| rs1257811340 | intron_variant                                                                                                          |
| rs1257823647 | intron_variant                                                                                                          |
| rs1257844148 | intron_variant,2KB_upstream_variant,genic_upstream_transcript_variant,upstream_transcript_variant                       |
| rs1257852670 | genic_upstream_transcript_variant,intron_variant                                                                        |
| rs1257853630 | genic_downstream_transcript_variant,intron_variant                                                                      |
| rs1257857935 | genic_downstream_transcript_variant,intron_variant                                                                      |
| rs1257889335 | genic_upstream_transcript_variant,intron_variant                                                                        |
| rs1257915454 | intron_variant                                                                                                          |
| rs1257935758 | intron_variant                                                                                                          |
| rs1257959133 | genic_upstream_transcript_variant,intron_variant                                                                        |
| rs1257997212 | intron_variant                                                                                                          |
| rs1258031674 | genic_upstream_transcript_variant,intron_variant                                                                        |
| rs1258066110 | genic_upstream_transcript_variant,intron_variant                                                                        |
| rs1258088041 | non_coding_transcript_variant,missense_variant,coding_sequence_variant                                                  |
| rs1258119991 | genic_downstream_transcript_variant,intron_variant                                                                      |
| rs1258140541 | genic_upstream_transcript_variant,intron_variant                                                                        |
| rs1258141410 | intron_variant                                                                                                          |
| rs1258162164 | genic_upstream_transcript_variant,intron_variant                                                                        |
| rs1258181216 | intron_variant                                                                                                          |
| rs1258207877 | genic_downstream_transcript_variant,intron_variant                                                                      |
| rs1258207909 | genic_downstream_transcript_variant,intron_variant                                                                      |
| rs1258223955 | genic_upstream_transcript_variant,intron_variant                                                                        |
| rs1258284337 | genic_upstream_transcript_variant,intron_variant                                                                        |
| rs1258303518 | intron_variant                                                                                                          |

|              |                                                                                                                         |
|--------------|-------------------------------------------------------------------------------------------------------------------------|
| rs1258329043 | intron_variant                                                                                                          |
| rs1258398427 | genic_upstream_transcript_variant,intron_variant                                                                        |
| rs1258411721 | genic_upstream_transcript_variant,intron_variant                                                                        |
| rs1258454596 | intron_variant                                                                                                          |
| rs1258470863 | intron_variant,2KB_upstream_variant,genic_upstream_transcript_variant,upstream_transcript_variant                       |
| rs1258497687 | intron_variant                                                                                                          |
| rs1258543962 | genic_downstream_transcript_variant,intron_variant                                                                      |
| rs1258549372 | intron_variant                                                                                                          |
| rs1258618103 | genic_downstream_transcript_variant,intron_variant                                                                      |
| rs1258621300 | intron_variant                                                                                                          |
| rs1258628318 | genic_upstream_transcript_variant,intron_variant                                                                        |
| rs1258733340 | intron_variant,genic_upstream_transcript_variant                                                                        |
| rs1258752950 | intron_variant,genic_downstream_transcript_variant                                                                      |
| rs1258771719 | intron_variant,genic_upstream_transcript_variant,upstream_transcript_variant                                            |
| rs1258840872 | intron_variant                                                                                                          |
| rs1258842336 | intron_variant,genic_upstream_transcript_variant                                                                        |
| rs1258869980 | intron_variant,genic_upstream_transcript_variant                                                                        |
| rs1258923143 | intron_variant,genic_downstream_transcript_variant                                                                      |
| rs1258957308 | intron_variant                                                                                                          |
| rs1258958446 | 2KB_upstream_variant,genic_upstream_transcript_variant,intron_variant,upstream_transcript_variant                       |
| rs1258984144 | intron_variant                                                                                                          |
| rs1259009141 | intron_variant,genic_upstream_transcript_variant                                                                        |
| rs1259013135 | intron_variant,genic_upstream_transcript_variant                                                                        |
| rs1259022775 | intron_variant,genic_downstream_transcript_variant                                                                      |
| rs1259038686 | intron_variant,genic_upstream_transcript_variant                                                                        |
| rs1259058383 | intron_variant                                                                                                          |
| rs1259076595 | 5_prime_UTR_variant,intron_variant                                                                                      |
| rs1259168791 | intron_variant,genic_upstream_transcript_variant                                                                        |
| rs1259204167 | intron_variant,genic_upstream_transcript_variant                                                                        |
| rs1259220607 | intron_variant                                                                                                          |
| rs1259247533 | 2KB_upstream_variant,intron_variant,upstream_transcript_variant,genic_upstream_transcript_variant                       |
| rs1259266907 | intron_variant                                                                                                          |
| rs1259294863 | intron_variant,genic_upstream_transcript_variant                                                                        |
| rs1259318185 | intron_variant,genic_upstream_transcript_variant                                                                        |
| rs1259377256 | intron_variant,genic_upstream_transcript_variant                                                                        |
| rs1259422583 | intron_variant,genic_upstream_transcript_variant                                                                        |
| rs1259423757 | intron_variant                                                                                                          |
| rs1259469540 | intron_variant,genic_upstream_transcript_variant                                                                        |
| rs1259496902 | intron_variant,genic_upstream_transcript_variant                                                                        |
| rs1259523949 | intron_variant,genic_upstream_transcript_variant                                                                        |
| rs1259524001 | intron_variant,genic_downstream_transcript_variant                                                                      |
| rs1259528093 | intron_variant                                                                                                          |
| rs1259567971 | intron_variant,genic_upstream_transcript_variant                                                                        |
| rs1259595147 | intron_variant                                                                                                          |
| rs1259607542 | intron_variant,genic_downstream_transcript_variant                                                                      |
| rs1259647785 | intron_variant,genic_downstream_transcript_variant                                                                      |
| rs1259672070 | intron_variant,genic_upstream_transcript_variant                                                                        |
| rs1259699848 | intron_variant,genic_upstream_transcript_variant                                                                        |
| rs1259709770 | intron_variant,genic_downstream_transcript_variant                                                                      |
| rs1259747556 | intron_variant                                                                                                          |
| rs1259762463 | intron_variant,genic_upstream_transcript_variant                                                                        |
| rs1259779984 | intron_variant,genic_upstream_transcript_variant                                                                        |
| rs1259816980 | intron_variant,genic_upstream_transcript_variant                                                                        |
| rs1259824078 | intron_variant,genic_upstream_transcript_variant                                                                        |
| rs1259833437 | intron_variant                                                                                                          |
| rs1259941083 | intron_variant                                                                                                          |
| rs1259946939 | intron_variant,genic_upstream_transcript_variant                                                                        |
| rs1259949645 | intron_variant,genic_downstream_transcript_variant                                                                      |
| rs1259950066 | non_coding_transcript_variant,3_prime_UTR_variant,genic_downstream_transcript_variant                                   |
| rs1259956013 | intron_variant,genic_upstream_transcript_variant                                                                        |
| rs1259985584 | non_coding_transcript_variant,3_prime_UTR_variant,genic_downstream_transcript_variant                                   |
| rs1260001540 | intron_variant,genic_upstream_transcript_variant,coding_sequence_variant,non_coding_transcript_variant,missense_variant |
| rs1260007248 | intron_variant,genic_upstream_transcript_variant                                                                        |
| rs1260038194 | intron_variant,genic_upstream_transcript_variant                                                                        |
| rs1260070533 | intron_variant,genic_upstream_transcript_variant                                                                        |
| rs1260104319 | intron_variant,genic_downstream_transcript_variant                                                                      |
| rs1260124092 | intron_variant,genic_upstream_transcript_variant                                                                        |
| rs1260159912 | 2KB_upstream_variant,genic_upstream_transcript_variant,intron_variant,upstream_transcript_variant                       |
| rs1260208879 | intron_variant,genic_downstream_transcript_variant                                                                      |
| rs1260243834 | intron_variant                                                                                                          |
| rs1260312711 | intron_variant,genic_upstream_transcript_variant                                                                        |
| rs1260325129 | intron_variant,genic_downstream_transcript_variant                                                                      |
| rs1260339214 | non_coding_transcript_variant,3_prime_UTR_variant,genic_downstream_transcript_variant                                   |
| rs1260416556 | downstream_transcript_variant,500B_downstream_variant                                                                   |

|              |                                                                                                   |
|--------------|---------------------------------------------------------------------------------------------------|
| rs1260440133 | intron_variant                                                                                    |
| rs1260484288 | intron_variant                                                                                    |
| rs1260495798 | intron_variant,genic_downstream_transcript_variant                                                |
| rs1260495920 | intron_variant                                                                                    |
| rs1260507122 | intron_variant,genic_downstream_transcript_variant                                                |
| rs1260519586 | intron_variant,genic_downstream_transcript_variant                                                |
| rs1260566494 | intron_variant                                                                                    |
| rs1260566934 | 2KB_upstream_variant,genic_upstream_transcript_variant,intron_variant,upstream_transcript_variant |
| rs1260607781 | intron_variant,genic_upstream_transcript_variant                                                  |
| rs1260611824 | intron_variant,genic_upstream_transcript_variant                                                  |
| rs1260659719 | intron_variant,genic_downstream_transcript_variant                                                |
| rs1260660345 | intron_variant                                                                                    |
| rs1260673035 | intron_variant                                                                                    |
| rs1260794052 | intron_variant,genic_downstream_transcript_variant                                                |
| rs1260846553 | intron_variant                                                                                    |
| rs1260848441 | intron_variant,genic_upstream_transcript_variant                                                  |
| rs1260856431 | downstream_transcript_variant,500B_downstream_variant                                             |
| rs1260859495 | intron_variant                                                                                    |
| rs1260914298 | intron_variant,genic_downstream_transcript_variant                                                |
| rs1261027459 | intron_variant,genic_upstream_transcript_variant                                                  |
| rs1261051921 | intron_variant                                                                                    |
| rs1261079833 | non_coding_transcript_variant,3_prime_UTR_variant,genic_downstream_transcript_variant             |
| rs1261110624 | intron_variant,genic_upstream_transcript_variant                                                  |
| rs1261119813 | intron_variant                                                                                    |
| rs1261142067 | intron_variant                                                                                    |
| rs1261169204 | intron_variant                                                                                    |
| rs1261183013 | intron_variant,genic_upstream_transcript_variant                                                  |
| rs1261233119 | intron_variant,genic_downstream_transcript_variant                                                |
| rs1261258771 | intron_variant                                                                                    |
| rs1261268865 | intron_variant                                                                                    |
| rs1261381978 | intron_variant,genic_downstream_transcript_variant                                                |
| rs1261456064 | intron_variant,genic_downstream_transcript_variant                                                |
| rs1261466999 | intron_variant                                                                                    |
| rs1261468112 | intron_variant,genic_upstream_transcript_variant                                                  |
| rs1261479001 | intron_variant,genic_upstream_transcript_variant                                                  |
| rs1261479123 | intron_variant,genic_downstream_transcript_variant                                                |
| rs1261537196 | intron_variant,genic_upstream_transcript_variant                                                  |
| rs1261567748 | intron_variant,genic_upstream_transcript_variant                                                  |
| rs1261613474 | intron_variant,genic_downstream_transcript_variant                                                |
| rs1261620956 | intron_variant,genic_downstream_transcript_variant                                                |
| rs1261632170 | intron_variant,genic_upstream_transcript_variant                                                  |
| rs1261636019 | intron_variant,genic_upstream_transcript_variant                                                  |
| rs1261685417 | intron_variant,genic_upstream_transcript_variant                                                  |
| rs1261704425 | intron_variant                                                                                    |
| rs1261704732 | intron_variant,genic_upstream_transcript_variant,upstream_transcript_variant                      |
| rs1261761288 | intron_variant,genic_upstream_transcript_variant                                                  |
| rs1261871479 | intron_variant,genic_downstream_transcript_variant                                                |
| rs1261881230 | intron_variant,genic_upstream_transcript_variant                                                  |
| rs1261907989 | intron_variant,genic_downstream_transcript_variant                                                |
| rs1261951023 | intron_variant,genic_downstream_transcript_variant                                                |
| rs1262084868 | intron_variant                                                                                    |
| rs1262121210 | intron_variant                                                                                    |
| rs1262129956 | intron_variant,genic_upstream_transcript_variant                                                  |
| rs1262139394 | intron_variant,genic_upstream_transcript_variant,upstream_transcript_variant                      |
| rs1262151508 | intron_variant                                                                                    |
| rs1262195411 | intron_variant                                                                                    |
| rs1262201349 | intron_variant,genic_upstream_transcript_variant                                                  |
| rs1262206087 | intron_variant                                                                                    |
| rs1262213420 | intron_variant,genic_upstream_transcript_variant                                                  |
| rs1262271583 | intron_variant,genic_upstream_transcript_variant                                                  |
| rs1262279105 | intron_variant                                                                                    |
| rs1262283132 | intron_variant                                                                                    |
| rs1262285676 | intron_variant                                                                                    |
| rs1262303556 | 2KB_upstream_variant,genic_upstream_transcript_variant,intron_variant,upstream_transcript_variant |
| rs1262304409 | intron_variant,genic_upstream_transcript_variant                                                  |
| rs1262362922 | intron_variant                                                                                    |
| rs1262363010 | intron_variant,genic_downstream_transcript_variant                                                |
| rs1262369585 | intron_variant,genic_upstream_transcript_variant                                                  |
| rs1262373900 | intron_variant,genic_upstream_transcript_variant                                                  |
| rs1262462179 | intron_variant,genic_downstream_transcript_variant                                                |
| rs1262483970 | intron_variant                                                                                    |
| rs1262486155 | intron_variant                                                                                    |
| rs1262496580 | intron_variant,genic_upstream_transcript_variant                                                  |
| rs1262523341 | intron_variant,genic_upstream_transcript_variant                                                  |

|              |                                                                                                              |
|--------------|--------------------------------------------------------------------------------------------------------------|
| rs1262567390 | intron_variant                                                                                               |
| rs1262626879 | intron_variant                                                                                               |
| rs1262648433 | intron_variant,genic_upstream_transcript_variant                                                             |
| rs1262663317 | intron_variant                                                                                               |
| rs1262685478 | 2KB_upstream_variant,intron_variant,upstream_transcript_variant,genic_upstream_transcript_variant            |
| rs1262707583 | intron_variant                                                                                               |
| rs1262725876 | intron_variant,genic_upstream_transcript_variant                                                             |
| rs1262743711 | intron_variant,genic_downstream_transcript_variant                                                           |
| rs1262768593 | non_coding_transcript_variant,synonymous_variant,coding_sequence_variant,genic_downstream_transcript_variant |
| rs1262818212 | intron_variant                                                                                               |
| rs1262879559 | intron_variant,genic_upstream_transcript_variant                                                             |
| rs1262897461 | intron_variant,genic_upstream_transcript_variant                                                             |
| rs1262910300 | 2KB_upstream_variant,intron_variant,upstream_transcript_variant,genic_upstream_transcript_variant            |
| rs1262919853 | intron_variant                                                                                               |
| rs1262925397 | intron_variant                                                                                               |
| rs1262935003 | intron_variant                                                                                               |
| rs1262960080 | intron_variant                                                                                               |
| rs1262980117 | intron_variant,genic_upstream_transcript_variant                                                             |
| rs1262993424 | intron_variant,genic_upstream_transcript_variant                                                             |
| rs1263013047 | intron_variant                                                                                               |
| rs1263050872 | non_coding_transcript_variant,5_prime_UTR_variant,genic_upstream_transcript_variant,intron_variant           |
| rs1263051771 | intron_variant                                                                                               |
| rs1263202629 | intron_variant,genic_upstream_transcript_variant                                                             |
| rs1263212131 | intron_variant                                                                                               |
| rs1263225671 | intron_variant                                                                                               |
| rs1263251532 | intron_variant,genic_upstream_transcript_variant,upstream_transcript_variant                                 |
| rs1263357401 | intron_variant,genic_upstream_transcript_variant,upstream_transcript_variant                                 |
| rs1263404612 | intron_variant,genic_downstream_transcript_variant                                                           |
| rs1263420949 | intron_variant                                                                                               |
| rs1263428214 | intron_variant                                                                                               |
| rs1263448012 | intron_variant                                                                                               |
| rs1263485653 | intron_variant,genic_upstream_transcript_variant                                                             |
| rs1263506226 | downstream_transcript_variant,500B_downstream_variant                                                        |
| rs1263552463 | intron_variant                                                                                               |
| rs1263573717 | intron_variant,genic_upstream_transcript_variant                                                             |
| rs1263584679 | intron_variant,genic_upstream_transcript_variant                                                             |
| rs1263588153 | intron_variant,genic_downstream_transcript_variant                                                           |
| rs1263619196 | intron_variant                                                                                               |
| rs1263628356 | intron_variant,genic_upstream_transcript_variant                                                             |
| rs1263668056 | intron_variant,genic_upstream_transcript_variant                                                             |
| rs1263686802 | intron_variant                                                                                               |
| rs1263693625 | intron_variant,genic_upstream_transcript_variant                                                             |
| rs1263694313 | intron_variant,genic_downstream_transcript_variant                                                           |
| rs1263697629 | intron_variant,genic_upstream_transcript_variant                                                             |
| rs1263702747 | intron_variant,genic_upstream_transcript_variant                                                             |
| rs1263711748 | intron_variant,genic_upstream_transcript_variant                                                             |
| rs1263760186 | intron_variant,genic_upstream_transcript_variant                                                             |
| rs1263766148 | intron_variant                                                                                               |
| rs1263769989 | intron_variant,genic_upstream_transcript_variant                                                             |
| rs1263780898 | intron_variant                                                                                               |
| rs1263817135 | intron_variant,genic_downstream_transcript_variant                                                           |
| rs1263833705 | intron_variant                                                                                               |
| rs1263855745 | intron_variant,genic_upstream_transcript_variant                                                             |
| rs1263855843 | intron_variant                                                                                               |
| rs1263857667 | intron_variant,genic_upstream_transcript_variant                                                             |
| rs1263864839 | intron_variant                                                                                               |
| rs1263869350 | intron_variant                                                                                               |
| rs1263913910 | intron_variant,genic_downstream_transcript_variant                                                           |
| rs1263924065 | intron_variant,genic_upstream_transcript_variant                                                             |
| rs1263935801 | intron_variant                                                                                               |
| rs1264001884 | intron_variant                                                                                               |
| rs1264006612 | intron_variant                                                                                               |
| rs1264014006 | intron_variant,genic_upstream_transcript_variant                                                             |
| rs1264020929 | intron_variant                                                                                               |
| rs1264044255 | intron_variant,genic_downstream_transcript_variant                                                           |
| rs1264071222 | intron_variant,genic_downstream_transcript_variant                                                           |
| rs1264113576 | intron_variant                                                                                               |
| rs1264139877 | intron_variant,genic_upstream_transcript_variant                                                             |
| rs1264146174 | 2KB_upstream_variant,genic_upstream_transcript_variant,intron_variant,upstream_transcript_variant            |
| rs1264247778 | 2KB_upstream_variant,intron_variant,upstream_transcript_variant,genic_upstream_transcript_variant            |
| rs1264264681 | intron_variant                                                                                               |
| rs1264283247 | intron_variant,genic_upstream_transcript_variant                                                             |
| rs1264329868 | intron_variant,genic_upstream_transcript_variant                                                             |
| rs1264345366 | intron_variant                                                                                               |

|              |                                                                                                                           |
|--------------|---------------------------------------------------------------------------------------------------------------------------|
| rs1264371589 | intron_variant,genic_upstream_transcript_variant                                                                          |
| rs1264418745 | intron_variant,genic_downstream_transcript_variant                                                                        |
| rs1264467440 | intron_variant                                                                                                            |
| rs1264492455 | 2KB_upstream_variant,genic_upstream_transcript_variant,intron_variant,upstream_transcript_variant                         |
| rs1264492986 | intron_variant,genic_upstream_transcript_variant,upstream_transcript_variant                                              |
| rs1264523457 | intron_variant                                                                                                            |
| rs1264531949 | intron_variant                                                                                                            |
| rs1264571435 | intron_variant                                                                                                            |
| rs1264609812 | intron_variant,genic_upstream_transcript_variant                                                                          |
| rs1264616517 | intron_variant                                                                                                            |
| rs1264706400 | intron_variant                                                                                                            |
| rs1264706454 | non_coding_transcript_variant,3_prime_UTR_variant,genic_downstream_transcript_variant                                     |
| rs1264726211 | intron_variant                                                                                                            |
| rs1264739065 | intron_variant,genic_upstream_transcript_variant                                                                          |
| rs1264756387 | intron_variant,genic_upstream_transcript_variant                                                                          |
| rs1264776318 | intron_variant,genic_upstream_transcript_variant                                                                          |
| rs1264798179 | intron_variant                                                                                                            |
| rs1264844178 | intron_variant,genic_upstream_transcript_variant                                                                          |
| rs1264899368 | intron_variant,genic_upstream_transcript_variant                                                                          |
| rs1264955778 | intron_variant,genic_downstream_transcript_variant                                                                        |
| rs1264989567 | intron_variant,genic_downstream_transcript_variant                                                                        |
| rs1265041111 | intron_variant,genic_downstream_transcript_variant                                                                        |
| rs1265068248 | intron_variant,genic_downstream_transcript_variant                                                                        |
| rs1265071852 | intron_variant,genic_upstream_transcript_variant                                                                          |
| rs1265111752 | intron_variant                                                                                                            |
| rs1265120061 | intron_variant,genic_downstream_transcript_variant                                                                        |
| rs1265133807 | intron_variant,genic_upstream_transcript_variant                                                                          |
| rs1265160652 | intron_variant,genic_downstream_transcript_variant                                                                        |
| rs1265174847 | intron_variant                                                                                                            |
| rs1265177629 | intron_variant,genic_upstream_transcript_variant,upstream_transcript_variant                                              |
| rs1265277471 | intron_variant,genic_upstream_transcript_variant                                                                          |
| rs1265281832 | intron_variant,genic_upstream_transcript_variant                                                                          |
| rs1265295558 | intron_variant,genic_downstream_transcript_variant                                                                        |
| rs1265387204 | intron_variant,genic_upstream_transcript_variant                                                                          |
| rs1265389228 | intron_variant                                                                                                            |
| rs1265410295 | intron_variant,genic_upstream_transcript_variant                                                                          |
| rs1265448922 | intron_variant,genic_downstream_transcript_variant                                                                        |
| rs1265456287 | intron_variant                                                                                                            |
| rs1265466188 | intron_variant,genic_upstream_transcript_variant                                                                          |
| rs1265502933 | intron_variant                                                                                                            |
| rs1265506197 | intron_variant,genic_downstream_transcript_variant                                                                        |
| rs1265523956 | intron_variant                                                                                                            |
| rs1265589397 | intron_variant,genic_upstream_transcript_variant                                                                          |
| rs1265596965 | intron_variant                                                                                                            |
| rs1265671115 | intron_variant,genic_upstream_transcript_variant,upstream_transcript_variant                                              |
| rs1265677027 | intron_variant                                                                                                            |
| rs1265719293 | intron_variant,genic_upstream_transcript_variant                                                                          |
| rs1265733679 | intron_variant                                                                                                            |
| rs1265763417 | intron_variant,genic_downstream_transcript_variant                                                                        |
| rs1265810319 | non_coding_transcript_variant,5_prime_UTR_variant,intron_variant,genic_upstream_transcript_variant                        |
| rs1265813578 | intron_variant                                                                                                            |
| rs1265898838 | intron_variant                                                                                                            |
| rs1265898927 | intron_variant,genic_upstream_transcript_variant                                                                          |
| rs1265911623 | intron_variant                                                                                                            |
| rs1265915068 | intron_variant,genic_upstream_transcript_variant                                                                          |
| rs1265925864 | intron_variant                                                                                                            |
| rs1265928842 | intron_variant                                                                                                            |
| rs1265966589 | intron_variant,genic_upstream_transcript_variant                                                                          |
| rs1265997685 | intron_variant,genic_upstream_transcript_variant                                                                          |
| rs1266064482 | intron_variant,genic_downstream_transcript_variant                                                                        |
| rs1266082683 | intron_variant,genic_downstream_transcript_variant                                                                        |
| rs1266134740 | intron_variant,genic_upstream_transcript_variant                                                                          |
| rs1266141030 | intron_variant                                                                                                            |
| rs1266157358 | intron_variant,genic_upstream_transcript_variant                                                                          |
| rs1266208625 | intron_variant                                                                                                            |
| rs1266212951 | intron_variant,genic_upstream_transcript_variant                                                                          |
| rs1266234864 | intron_variant                                                                                                            |
| rs1266240357 | intron_variant,genic_upstream_transcript_variant                                                                          |
| rs1266319879 | intron_variant,coding_sequence_variant,synonymous_variant,non_coding_transcript_variant,genic_upstream_transcript_variant |
| rs1266366684 | intron_variant,genic_downstream_transcript_variant                                                                        |
| rs1266379680 | intron_variant,genic_upstream_transcript_variant                                                                          |
| rs1266394693 | intron_variant,genic_upstream_transcript_variant,upstream_transcript_variant                                              |
| rs1266415296 | intron_variant,genic_upstream_transcript_variant                                                                          |
| rs1266421569 | intron_variant,genic_upstream_transcript_variant                                                                          |

|              |                                                                                                            |
|--------------|------------------------------------------------------------------------------------------------------------|
| rs1266425510 | intron_variant,genic_upstream_transcript_variant                                                           |
| rs1266429947 | intron_variant,genic_upstream_transcript_variant                                                           |
| rs1266472527 | intron_variant,genic_downstream_transcript_variant                                                         |
| rs1266481010 | intron_variant                                                                                             |
| rs1266531077 | intron_variant                                                                                             |
| rs1266545007 | intron_variant,genic_upstream_transcript_variant                                                           |
| rs1266561592 | intron_variant,genic_downstream_transcript_variant                                                         |
| rs1266565086 | intron_variant                                                                                             |
| rs1266567934 | intron_variant                                                                                             |
| rs1266570238 | intron_variant,genic_upstream_transcript_variant                                                           |
| rs1266570718 | intron_variant,genic_upstream_transcript_variant                                                           |
| rs1266571099 | intron_variant,genic_upstream_transcript_variant                                                           |
| rs1266590447 | intron_variant                                                                                             |
| rs1266596960 | intron_variant                                                                                             |
| rs1266663868 | 2KB_upstream_variant,intron_variant,upstream_transcript_variant,genic_upstream_transcript_variant          |
| rs1266680120 | intron_variant,genic_upstream_transcript_variant                                                           |
| rs1266741708 | intron_variant,genic_upstream_transcript_variant                                                           |
| rs1266743285 | intron_variant,genic_upstream_transcript_variant                                                           |
| rs1266763017 | intron_variant                                                                                             |
| rs1266779693 | intron_variant                                                                                             |
| rs1266790730 | intron_variant,genic_downstream_transcript_variant                                                         |
| rs1266800457 | intron_variant,genic_upstream_transcript_variant                                                           |
| rs1266810947 | intron_variant,genic_upstream_transcript_variant                                                           |
| rs1266833135 | 2KB_upstream_variant,genic_upstream_transcript_variant,intron_variant,upstream_transcript_variant          |
| rs1266867499 | intron_variant,genic_upstream_transcript_variant                                                           |
| rs1266871309 | intron_variant                                                                                             |
| rs1266967070 | intron_variant,genic_downstream_transcript_variant                                                         |
| rs1266977012 | intron_variant,genic_upstream_transcript_variant                                                           |
| rs1267041840 | intron_variant,genic_upstream_transcript_variant                                                           |
| rs1267096603 | intron_variant,genic_downstream_transcript_variant                                                         |
| rs1267096845 | intron_variant,genic_upstream_transcript_variant                                                           |
| rs1267099111 | 2KB_upstream_variant,genic_upstream_transcript_variant,intron_variant,upstream_transcript_variant          |
| rs1267104861 | intron_variant                                                                                             |
| rs1267121730 | intron_variant,genic_upstream_transcript_variant                                                           |
| rs1267171884 | intron_variant,genic_upstream_transcript_variant                                                           |
| rs1267190613 | downstream_transcript_variant,500B_downstream_variant                                                      |
| rs1267269082 | intron_variant,genic_upstream_transcript_variant                                                           |
| rs1267276106 | intron_variant,genic_downstream_transcript_variant                                                         |
| rs1267289866 | intron_variant,genic_upstream_transcript_variant                                                           |
| rs1267341909 | intron_variant,genic_upstream_transcript_variant                                                           |
| rs1267342507 | intron_variant,genic_upstream_transcript_variant,upstream_transcript_variant                               |
| rs1267352914 | intron_variant,genic_upstream_transcript_variant                                                           |
| rs1267363125 | intron_variant,genic_upstream_transcript_variant                                                           |
| rs1267408813 | intron_variant                                                                                             |
| rs1267419620 | non_coding_transcript_variant,missense_variant,coding_sequence_variant,genic_downstream_transcript_variant |
| rs1267429223 | intron_variant                                                                                             |
| rs1267457825 | intron_variant                                                                                             |
| rs1267496294 | intron_variant,genic_downstream_transcript_variant                                                         |
| rs1267521691 | intron_variant,genic_upstream_transcript_variant                                                           |
| rs1267549275 | intron_variant,genic_downstream_transcript_variant                                                         |
| rs1267554631 | intron_variant,genic_upstream_transcript_variant,upstream_transcript_variant                               |
| rs1267597048 | intron_variant                                                                                             |
| rs1267597200 | non_coding_transcript_variant,3_prime_UTR_variant,genic_downstream_transcript_variant                      |
| rs1267602049 | intron_variant,genic_upstream_transcript_variant,upstream_transcript_variant                               |
| rs1267624824 | intron_variant,genic_upstream_transcript_variant                                                           |
| rs1267631828 | intron_variant,genic_downstream_transcript_variant                                                         |
| rs1267649933 | intron_variant,genic_upstream_transcript_variant                                                           |
| rs1267698626 | intron_variant                                                                                             |
| rs1267805730 | intron_variant,genic_downstream_transcript_variant                                                         |
| rs1267911481 | intron_variant                                                                                             |
| rs1267924842 | non_coding_transcript_variant,3_prime_UTR_variant,genic_downstream_transcript_variant                      |
| rs1267937498 | intron_variant,genic_upstream_transcript_variant                                                           |
| rs1267947909 | intron_variant                                                                                             |
| rs1267952693 | intron_variant,genic_downstream_transcript_variant                                                         |
| rs1267955231 | intron_variant,genic_downstream_transcript_variant                                                         |
| rs1267969037 | intron_variant                                                                                             |
| rs1267999665 | intron_variant,genic_upstream_transcript_variant                                                           |
| rs1268007339 | intron_variant,genic_upstream_transcript_variant                                                           |
| rs1268014059 | intron_variant,genic_downstream_transcript_variant                                                         |
| rs1268014365 | intron_variant,genic_downstream_transcript_variant                                                         |
| rs1268030382 | 2KB_upstream_variant,genic_upstream_transcript_variant,intron_variant,upstream_transcript_variant          |
| rs1268037087 | intron_variant,genic_downstream_transcript_variant                                                         |
| rs1268044324 | intron_variant,genic_upstream_transcript_variant                                                           |
| rs1268054380 | intron_variant                                                                                             |

|              |                                                                                                                           |
|--------------|---------------------------------------------------------------------------------------------------------------------------|
| rs1268077800 | intron_variant                                                                                                            |
| rs1268093312 | intron_variant                                                                                                            |
| rs1268119349 | intron_variant,genic_upstream_transcript_variant                                                                          |
| rs1268186645 | intron_variant,genic_upstream_transcript_variant                                                                          |
| rs1268187927 | intron_variant                                                                                                            |
| rs1268280839 | intron_variant,downstream_transcript_variant,genic_downstream_transcript_variant                                          |
| rs1268283013 | intron_variant,genic_downstream_transcript_variant                                                                        |
| rs1268301263 | intron_variant                                                                                                            |
| rs1268314646 | intron_variant                                                                                                            |
| rs1268316680 | intron_variant                                                                                                            |
| rs1268322924 | intron_variant                                                                                                            |
| rs1268397494 | intron_variant,genic_downstream_transcript_variant                                                                        |
| rs1268409776 | intron_variant,genic_upstream_transcript_variant                                                                          |
| rs1268414692 | 2KB_upstream_variant,genic_upstream_transcript_variant,intron_variant,upstream_transcript_variant                         |
| rs1268448540 | intron_variant,genic_upstream_transcript_variant                                                                          |
| rs1268460422 | intron_variant,genic_upstream_transcript_variant                                                                          |
| rs1268477184 | intron_variant,genic_upstream_transcript_variant                                                                          |
| rs1268491538 | intron_variant,genic_downstream_transcript_variant                                                                        |
| rs1268500087 | intron_variant,genic_upstream_transcript_variant                                                                          |
| rs1268518192 | intron_variant,genic_upstream_transcript_variant                                                                          |
| rs1268539188 | intron_variant,genic_upstream_transcript_variant                                                                          |
| rs1268543138 | intron_variant,genic_upstream_transcript_variant                                                                          |
| rs1268551338 | intron_variant                                                                                                            |
| rs1268567717 | intron_variant,genic_upstream_transcript_variant,upstream_transcript_variant                                              |
| rs1268568333 | intron_variant                                                                                                            |
| rs1268580953 | intron_variant                                                                                                            |
| rs1268589933 | intron_variant,genic_upstream_transcript_variant                                                                          |
| rs1268611842 | intron_variant                                                                                                            |
| rs1268642668 | intron_variant,genic_downstream_transcript_variant                                                                        |
| rs1268674634 | intron_variant,genic_downstream_transcript_variant                                                                        |
| rs1268692132 | intron_variant,genic_upstream_transcript_variant,upstream_transcript_variant                                              |
| rs1268711657 | intron_variant                                                                                                            |
| rs1268718333 | intron_variant,genic_upstream_transcript_variant,upstream_transcript_variant                                              |
| rs1268724874 | 5_prime_UTR_variant,intron_variant                                                                                        |
| rs1268753458 | intron_variant                                                                                                            |
| rs1268773094 | intron_variant                                                                                                            |
| rs1268792821 | intron_variant,genic_upstream_transcript_variant                                                                          |
| rs1268823581 | intron_variant,genic_upstream_transcript_variant                                                                          |
| rs1268849644 | intron_variant                                                                                                            |
| rs1268875887 | intron_variant,genic_downstream_transcript_variant                                                                        |
| rs1268890696 | intron_variant                                                                                                            |
| rs1268920478 | intron_variant,genic_upstream_transcript_variant                                                                          |
| rs1268940780 | intron_variant                                                                                                            |
| rs1268947712 | intron_variant,genic_upstream_transcript_variant                                                                          |
| rs1268971643 | intron_variant,genic_downstream_transcript_variant                                                                        |
| rs1269007797 | intron_variant,genic_upstream_transcript_variant                                                                          |
| rs1269083785 | intron_variant                                                                                                            |
| rs1269084226 | intron_variant,genic_upstream_transcript_variant                                                                          |
| rs1269149486 | intron_variant,genic_upstream_transcript_variant                                                                          |
| rs1269191859 | intron_variant,coding_sequence_variant,synonymous_variant,non_coding_transcript_variant,genic_upstream_transcript_variant |
| rs1269248713 | intron_variant,genic_upstream_transcript_variant                                                                          |
| rs1269319758 | intron_variant                                                                                                            |
| rs1269328602 | intron_variant,genic_upstream_transcript_variant                                                                          |
| rs1269391733 | intron_variant,genic_downstream_transcript_variant                                                                        |
| rs1269394190 | intron_variant,genic_upstream_transcript_variant                                                                          |
| rs1269411388 | intron_variant                                                                                                            |
| rs1269420897 | intron_variant,genic_upstream_transcript_variant                                                                          |
| rs1269444000 | 2KB_upstream_variant,intron_variant,upstream_transcript_variant,genic_upstream_transcript_variant                         |
| rs1269459319 | intron_variant,genic_upstream_transcript_variant                                                                          |
| rs1269460192 | intron_variant,genic_upstream_transcript_variant                                                                          |
| rs1269475572 | intron_variant,genic_upstream_transcript_variant                                                                          |
| rs1269529639 | intron_variant                                                                                                            |
| rs1269535609 | intron_variant,genic_upstream_transcript_variant                                                                          |
| rs1269549520 | intron_variant,genic_upstream_transcript_variant                                                                          |
| rs1269574918 | intron_variant,genic_upstream_transcript_variant                                                                          |
| rs1269588659 | intron_variant,genic_downstream_transcript_variant                                                                        |
| rs1269602807 | non_coding_transcript_variant,3_prime_UTR_variant,genic_downstream_transcript_variant                                     |
| rs1269621250 | intron_variant,genic_downstream_transcript_variant                                                                        |
| rs1269657341 | intron_variant                                                                                                            |
| rs1269659047 | intron_variant                                                                                                            |
| rs1269706080 | intron_variant                                                                                                            |
| rs1269730743 | intron_variant                                                                                                            |
| rs1269743926 | intron_variant                                                                                                            |
| rs1269775940 | intron_variant,genic_downstream_transcript_variant                                                                        |

|              |                                                                                                   |
|--------------|---------------------------------------------------------------------------------------------------|
| rs1269814098 | non_coding_transcript_variant,3_prime_UTR_variant,genic_downstream_transcript_variant             |
| rs1269864381 | intron_variant,genic_upstream_transcript_variant                                                  |
| rs1269915986 | intron_variant,genic_upstream_transcript_variant                                                  |
| rs1269924078 | intron_variant,genic_downstream_transcript_variant                                                |
| rs126995706  | intron_variant,genic_upstream_transcript_variant                                                  |
| rs1270015773 | intron_variant,genic_downstream_transcript_variant                                                |
| rs1270111196 | intron_variant,genic_upstream_transcript_variant                                                  |
| rs1270140640 | intron_variant,genic_upstream_transcript_variant,upstream_transcript_variant                      |
| rs1270202780 | intron_variant                                                                                    |
| rs1270203029 | intron_variant                                                                                    |
| rs1270211245 | intron_variant,genic_upstream_transcript_variant                                                  |
| rs1270211422 | intron_variant,genic_upstream_transcript_variant                                                  |
| rs1270213566 | intron_variant,genic_downstream_transcript_variant                                                |
| rs1270260986 | intron_variant                                                                                    |
| rs1270283992 | intron_variant                                                                                    |
| rs1270332386 | non_coding_transcript_variant,3_prime_UTR_variant,genic_downstream_transcript_variant             |
| rs1270343851 | intron_variant,genic_upstream_transcript_variant                                                  |
| rs1270347996 | intron_variant,genic_downstream_transcript_variant                                                |
| rs1270383335 | intron_variant                                                                                    |
| rs1270383848 | intron_variant,genic_upstream_transcript_variant                                                  |
| rs1270397095 | intron_variant,genic_downstream_transcript_variant                                                |
| rs1270409168 | intron_variant,genic_downstream_transcript_variant                                                |
| rs1270434765 | intron_variant,genic_downstream_transcript_variant                                                |
| rs1270488345 | intron_variant,genic_downstream_transcript_variant                                                |
| rs1270491965 | intron_variant                                                                                    |
| rs1270493821 | intron_variant,genic_upstream_transcript_variant,upstream_transcript_variant                      |
| rs1270496136 | intron_variant,genic_downstream_transcript_variant                                                |
| rs1270587436 | intron_variant,genic_upstream_transcript_variant                                                  |
| rs1270595949 | intron_variant,genic_downstream_transcript_variant                                                |
| rs1270597191 | intron_variant,genic_upstream_transcript_variant                                                  |
| rs1270638173 | intron_variant,genic_upstream_transcript_variant                                                  |
| rs1270681698 | intron_variant                                                                                    |
| rs1270687423 | intron_variant                                                                                    |
| rs1270700890 | intron_variant,genic_upstream_transcript_variant,upstream_transcript_variant                      |
| rs1270724588 | intron_variant                                                                                    |
| rs1270731720 | intron_variant                                                                                    |
| rs1270763345 | intron_variant                                                                                    |
| rs1270764547 | intron_variant                                                                                    |
| rs1270801929 | intron_variant,genic_upstream_transcript_variant                                                  |
| rs1270820631 | intron_variant                                                                                    |
| rs1270820853 | intron_variant                                                                                    |
| rs1270863054 | intron_variant,genic_downstream_transcript_variant                                                |
| rs1270879627 | intron_variant                                                                                    |
| rs1270906901 | intron_variant,genic_upstream_transcript_variant                                                  |
| rs1270960929 | intron_variant,genic_upstream_transcript_variant                                                  |
| rs1270971153 | intron_variant,genic_upstream_transcript_variant                                                  |
| rs1271023596 | intron_variant,genic_upstream_transcript_variant                                                  |
| rs1271024528 | 5_prime_UTR_variant,intron_variant                                                                |
| rs1271067098 | 2KB_upstream_variant,genic_upstream_transcript_variant,intron_variant,upstream_transcript_variant |
| rs1271082117 | intron_variant,genic_upstream_transcript_variant                                                  |
| rs1271095289 | intron_variant,genic_upstream_transcript_variant                                                  |
| rs1271102748 | intron_variant                                                                                    |
| rs1271176407 | intron_variant,genic_upstream_transcript_variant                                                  |
| rs1271211591 | intron_variant                                                                                    |
| rs1271223115 | intron_variant                                                                                    |
| rs1271305036 | intron_variant,genic_upstream_transcript_variant                                                  |
| rs1271322855 | genic_downstream_transcript_variant,intron_variant                                                |
| rs1271328491 | genic_downstream_transcript_variant,intron_variant                                                |
| rs1271382339 | intron_variant,genic_upstream_transcript_variant                                                  |
| rs1271450346 | genic_downstream_transcript_variant,intron_variant,downstream_transcript_variant                  |
| rs1271461975 | genic_downstream_transcript_variant,intron_variant                                                |
| rs1271476358 | genic_downstream_transcript_variant,intron_variant                                                |
| rs1271487393 | intron_variant,genic_upstream_transcript_variant                                                  |
| rs1271507677 | intron_variant,genic_upstream_transcript_variant                                                  |
| rs1271562395 | intron_variant,genic_upstream_transcript_variant                                                  |
| rs1271566452 | genic_downstream_transcript_variant,intron_variant                                                |
| rs1271633342 | intron_variant,genic_upstream_transcript_variant                                                  |
| rs1271645541 | intron_variant                                                                                    |
| rs1271673163 | intron_variant                                                                                    |
| rs1271697724 | intron_variant                                                                                    |
| rs1271733182 | intron_variant,genic_upstream_transcript_variant                                                  |
| rs1271748852 | upstream_transcript_variant,intron_variant,genic_upstream_transcript_variant,2KB_upstream_variant |
| rs1271761738 | genic_downstream_transcript_variant,intron_variant                                                |
| rs1271778906 | non_coding_transcript_variant,genic_downstream_transcript_variant,3_prime_UTR_variant             |

|              |                                                                                                   |
|--------------|---------------------------------------------------------------------------------------------------|
| rs1271782836 | genic_downstream_transcript_variant,intron_variant                                                |
| rs1271865735 | intron_variant                                                                                    |
| rs1271902332 | intron_variant                                                                                    |
| rs1271905478 | intron_variant,genic_upstream_transcript_variant                                                  |
| rs1271922364 | intron_variant                                                                                    |
| rs1271932503 | genic_downstream_transcript_variant,intron_variant                                                |
| rs1271984909 | intron_variant,genic_upstream_transcript_variant                                                  |
| rs1272057679 | intron_variant,genic_upstream_transcript_variant                                                  |
| rs1272074290 | genic_downstream_transcript_variant,intron_variant                                                |
| rs1272117015 | intron_variant                                                                                    |
| rs1272175558 | intron_variant                                                                                    |
| rs1272186417 | genic_downstream_transcript_variant,intron_variant                                                |
| rs1272196499 | intron_variant                                                                                    |
| rs1272278388 | intron_variant,genic_upstream_transcript_variant                                                  |
| rs1272312513 | genic_downstream_transcript_variant,intron_variant                                                |
| rs1272320534 | non_coding_transcript_variant,genic_downstream_transcript_variant,3_prime_UTR_variant             |
| rs1272340467 | genic_downstream_transcript_variant,intron_variant                                                |
| rs1272396944 | intron_variant,genic_upstream_transcript_variant                                                  |
| rs1272404368 | non_coding_transcript_variant,genic_downstream_transcript_variant,3_prime_UTR_variant             |
| rs1272420960 | intron_variant                                                                                    |
| rs1272537718 | intron_variant,genic_upstream_transcript_variant                                                  |
| rs1272557212 | intron_variant                                                                                    |
| rs1272587756 | intron_variant,genic_upstream_transcript_variant                                                  |
| rs1272592193 | intron_variant                                                                                    |
| rs1272603873 | intron_variant,genic_upstream_transcript_variant                                                  |
| rs1272617326 | intron_variant                                                                                    |
| rs1272631805 | intron_variant,genic_upstream_transcript_variant                                                  |
| rs1272696846 | intron_variant,genic_upstream_transcript_variant                                                  |
| rs1272698128 | intron_variant,genic_upstream_transcript_variant                                                  |
| rs1272722489 | intron_variant,genic_upstream_transcript_variant                                                  |
| rs1272733884 | intron_variant,genic_upstream_transcript_variant                                                  |
| rs1272734421 | intron_variant                                                                                    |
| rs1272782141 | intron_variant,genic_upstream_transcript_variant                                                  |
| rs1272823749 | intron_variant,genic_upstream_transcript_variant                                                  |
| rs1272828855 | intron_variant,genic_upstream_transcript_variant                                                  |
| rs1272850760 | genic_downstream_transcript_variant,intron_variant                                                |
| rs1272868492 | upstream_transcript_variant,intron_variant,genic_upstream_transcript_variant                      |
| rs1272870635 | intron_variant,genic_upstream_transcript_variant                                                  |
| rs1272899215 | genic_downstream_transcript_variant,intron_variant                                                |
| rs1272918935 | intron_variant,genic_upstream_transcript_variant                                                  |
| rs1272929122 | intron_variant                                                                                    |
| rs1272933112 | intron_variant,genic_upstream_transcript_variant                                                  |
| rs1272945226 | non_coding_transcript_variant,intron_variant,genic_upstream_transcript_variant                    |
| rs1272979769 | upstream_transcript_variant,intron_variant,genic_upstream_transcript_variant,2KB_upstream_variant |
| rs1273052250 | intron_variant                                                                                    |
| rs1273056732 | intron_variant,genic_upstream_transcript_variant                                                  |
| rs1273062258 | upstream_transcript_variant,intron_variant,genic_upstream_transcript_variant,2KB_upstream_variant |
| rs1273084503 | intron_variant,genic_upstream_transcript_variant                                                  |
| rs1273084687 | intron_variant,genic_upstream_transcript_variant                                                  |
| rs1273114533 | non_coding_transcript_variant,genic_downstream_transcript_variant,3_prime_UTR_variant             |
| rs1273178275 | intron_variant,genic_upstream_transcript_variant                                                  |
| rs1273199339 | intron_variant                                                                                    |
| rs1273223489 | intron_variant,genic_upstream_transcript_variant                                                  |
| rs1273314690 | intron_variant,genic_upstream_transcript_variant                                                  |
| rs1273316276 | intron_variant                                                                                    |
| rs1273353680 | genic_downstream_transcript_variant,intron_variant                                                |
| rs1273358157 | intron_variant,genic_upstream_transcript_variant                                                  |
| rs1273370956 | intron_variant                                                                                    |
| rs1273388859 | intron_variant,genic_upstream_transcript_variant                                                  |
| rs1273414936 | intron_variant                                                                                    |
| rs1273435114 | genic_downstream_transcript_variant,intron_variant                                                |
| rs1273442882 | intron_variant                                                                                    |
| rs1273457063 | intron_variant                                                                                    |
| rs1273460822 | intron_variant,genic_upstream_transcript_variant                                                  |
| rs1273464579 | intron_variant                                                                                    |
| rs1273474181 | intron_variant                                                                                    |
| rs1273474248 | genic_downstream_transcript_variant,intron_variant                                                |
| rs1273483201 | upstream_transcript_variant,2KB_upstream_variant,intron_variant,genic_upstream_transcript_variant |
| rs1273495779 | intron_variant,genic_upstream_transcript_variant                                                  |
| rs1273505543 | intron_variant,genic_upstream_transcript_variant                                                  |
| rs1273535888 | intron_variant                                                                                    |
| rs1273580423 | intron_variant,genic_upstream_transcript_variant                                                  |
| rs1273724771 | intron_variant,genic_upstream_transcript_variant                                                  |
| rs1273727722 | genic_downstream_transcript_variant,intron_variant                                                |

|              |                                                                                                                           |
|--------------|---------------------------------------------------------------------------------------------------------------------------|
| rs1273733576 | intron_variant                                                                                                            |
| rs1273739875 | intron_variant                                                                                                            |
| rs1273751798 | intron_variant,genic_upstream_transcript_variant                                                                          |
| rs1273752363 | intron_variant,genic_upstream_transcript_variant                                                                          |
| rs1273784620 | intron_variant,genic_upstream_transcript_variant                                                                          |
| rs1273810906 | intron_variant                                                                                                            |
| rs1273819384 | intron_variant,genic_upstream_transcript_variant                                                                          |
| rs1273868095 | intron_variant                                                                                                            |
| rs1273879606 | genic_downstream_transcript_variant,intron_variant                                                                        |
| rs1273926620 | 500B_downstream_variant,downstream_transcript_variant                                                                     |
| rs1273970296 | intron_variant,genic_upstream_transcript_variant                                                                          |
| rs1273988011 | missense_variant,non_coding_transcript_variant,coding_sequence_variant,intron_variant,genic_upstream_transcript_variant   |
| rs1273997256 | intron_variant,genic_upstream_transcript_variant                                                                          |
| rs1274000718 | genic_downstream_transcript_variant,intron_variant                                                                        |
| rs1274027255 | genic_downstream_transcript_variant,intron_variant                                                                        |
| rs1274043788 | intron_variant                                                                                                            |
| rs1274081296 | intron_variant,genic_upstream_transcript_variant                                                                          |
| rs1274090937 | 5_prime_UTR_variant,intron_variant                                                                                        |
| rs1274120505 | intron_variant                                                                                                            |
| rs1274123833 | intron_variant,genic_upstream_transcript_variant                                                                          |
| rs1274143620 | genic_downstream_transcript_variant,intron_variant                                                                        |
| rs1274163180 | upstream_transcript_variant,intron_variant,genic_upstream_transcript_variant                                              |
| rs1274178540 | intron_variant,genic_upstream_transcript_variant                                                                          |
| rs1274214074 | intron_variant                                                                                                            |
| rs1274239740 | genic_downstream_transcript_variant,intron_variant                                                                        |
| rs1274295488 | intron_variant,genic_upstream_transcript_variant                                                                          |
| rs1274338412 | intron_variant                                                                                                            |
| rs1274339810 | intron_variant,genic_upstream_transcript_variant                                                                          |
| rs1274362652 | intron_variant                                                                                                            |
| rs1274377295 | intron_variant                                                                                                            |
| rs1274386081 | intron_variant                                                                                                            |
| rs1274471462 | intron_variant,genic_upstream_transcript_variant                                                                          |
| rs1274479297 | intron_variant                                                                                                            |
| rs1274496968 | intron_variant,genic_upstream_transcript_variant                                                                          |
| rs1274536123 | intron_variant,genic_upstream_transcript_variant                                                                          |
| rs1274547369 | intron_variant,genic_upstream_transcript_variant                                                                          |
| rs1274568469 | intron_variant,genic_upstream_transcript_variant                                                                          |
| rs1274587254 | intron_variant                                                                                                            |
| rs1274600374 | genic_downstream_transcript_variant,intron_variant                                                                        |
| rs1274644399 | intron_variant                                                                                                            |
| rs1274645069 | intron_variant                                                                                                            |
| rs1274675873 | intron_variant                                                                                                            |
| rs1274714567 | genic_downstream_transcript_variant,intron_variant                                                                        |
| rs1274719337 | genic_downstream_transcript_variant,intron_variant                                                                        |
| rs1274741509 | genic_downstream_transcript_variant,intron_variant                                                                        |
| rs1274769203 | intron_variant,genic_upstream_transcript_variant                                                                          |
| rs1274773656 | intron_variant                                                                                                            |
| rs1274827408 | intron_variant,genic_upstream_transcript_variant                                                                          |
| rs1274834695 | intron_variant,genic_upstream_transcript_variant                                                                          |
| rs1274873645 | intron_variant                                                                                                            |
| rs1274950946 | intron_variant,genic_upstream_transcript_variant                                                                          |
| rs1275001923 | intron_variant,genic_upstream_transcript_variant                                                                          |
| rs1275017631 | intron_variant,genic_upstream_transcript_variant                                                                          |
| rs1275029173 | genic_downstream_transcript_variant,intron_variant                                                                        |
| rs1275087522 | missense_variant,non_coding_transcript_variant,coding_sequence_variant,intron_variant,genic_upstream_transcript_variant   |
| rs1275124807 | non_coding_transcript_variant,missense_variant,genic_downstream_transcript_variant,coding_sequence_variant                |
| rs1275152897 | genic_downstream_transcript_variant,intron_variant                                                                        |
| rs1275186748 | intron_variant,genic_upstream_transcript_variant                                                                          |
| rs1275251026 | intron_variant,genic_upstream_transcript_variant                                                                          |
| rs1275314985 | intron_variant,genic_upstream_transcript_variant                                                                          |
| rs1275328045 | intron_variant                                                                                                            |
| rs1275357431 | non_coding_transcript_variant,genic_downstream_transcript_variant,3_prime_UTR_variant                                     |
| rs1275385094 | genic_downstream_transcript_variant,intron_variant                                                                        |
| rs1275486227 | genic_downstream_transcript_variant,intron_variant                                                                        |
| rs1275517445 | intron_variant,genic_upstream_transcript_variant                                                                          |
| rs1275596895 | upstream_transcript_variant,intron_variant,genic_upstream_transcript_variant                                              |
| rs1275609972 | intron_variant,genic_upstream_transcript_variant                                                                          |
| rs1275647547 | intron_variant                                                                                                            |
| rs1275651632 | intron_variant                                                                                                            |
| rs1275654333 | genic_downstream_transcript_variant,intron_variant                                                                        |
| rs1275661752 | synonymous_variant,non_coding_transcript_variant,coding_sequence_variant,intron_variant,genic_upstream_transcript_variant |
| rs1275718228 | intron_variant                                                                                                            |
| rs1275723601 | intron_variant                                                                                                            |
| rs1275725329 | intron_variant,genic_upstream_transcript_variant                                                                          |

|              |                                                                                                   |
|--------------|---------------------------------------------------------------------------------------------------|
| rs1275754018 | intron_variant,genic_upstream_transcript_variant                                                  |
| rs1275781723 | genic_downstream_transcript_variant,intron_variant                                                |
| rs1275809659 | intron_variant,genic_upstream_transcript_variant                                                  |
| rs1275893989 | intron_variant,genic_upstream_transcript_variant                                                  |
| rs1275907943 | intron_variant                                                                                    |
| rs1275911637 | intron_variant,genic_upstream_transcript_variant                                                  |
| rs1275914492 | intron_variant,genic_upstream_transcript_variant                                                  |
| rs1275978331 | intron_variant,genic_upstream_transcript_variant                                                  |
| rs1276035998 | intron_variant                                                                                    |
| rs1276037404 | genic_downstream_transcript_variant,intron_variant                                                |
| rs1276108526 | intron_variant,genic_upstream_transcript_variant                                                  |
| rs1276157296 | intron_variant,genic_upstream_transcript_variant                                                  |
| rs1276203604 | intron_variant                                                                                    |
| rs1276215470 | intron_variant                                                                                    |
| rs1276221106 | upstream_transcript_variant,intron_variant,genic_upstream_transcript_variant                      |
| rs1276267801 | intron_variant                                                                                    |
| rs1276294981 | intron_variant                                                                                    |
| rs1276324192 | intron_variant,genic_upstream_transcript_variant                                                  |
| rs1276351734 | upstream_transcript_variant,intron_variant,genic_upstream_transcript_variant,2KB_upstream_variant |
| rs1276397391 | intron_variant                                                                                    |
| rs1276415135 | intron_variant,genic_upstream_transcript_variant                                                  |
| rs1276446010 | intron_variant                                                                                    |
| rs1276489401 | intron_variant,genic_upstream_transcript_variant                                                  |
| rs1276511153 | intron_variant                                                                                    |
| rs1276512434 | intron_variant,genic_upstream_transcript_variant                                                  |
| rs1276523357 | intron_variant                                                                                    |
| rs1276564264 | intron_variant                                                                                    |
| rs1276610201 | intron_variant,genic_upstream_transcript_variant                                                  |
| rs1276638136 | intron_variant,genic_upstream_transcript_variant                                                  |
| rs1276638458 | non_coding_transcript_variant,genic_downstream_transcript_variant,3_prime_UTR_variant             |
| rs1276658520 | intron_variant,genic_upstream_transcript_variant                                                  |
| rs1276700722 | intron_variant                                                                                    |
| rs1276739865 | intron_variant                                                                                    |
| rs1276765917 | intron_variant                                                                                    |
| rs1276779762 | intron_variant,genic_upstream_transcript_variant                                                  |
| rs1276815349 | intron_variant                                                                                    |
| rs1276841913 | 500B_downstream_variant,downstream_transcript_variant                                             |
| rs1276846232 | intron_variant                                                                                    |
| rs1276852337 | intron_variant                                                                                    |
| rs1276896980 | intron_variant                                                                                    |
| rs1276930490 | upstream_transcript_variant,2KB_upstream_variant,intron_variant,genic_upstream_transcript_variant |
| rs1276959222 | intron_variant,genic_upstream_transcript_variant                                                  |
| rs1276965726 | intron_variant                                                                                    |
| rs1276992647 | intron_variant,genic_upstream_transcript_variant                                                  |
| rs1277001581 | intron_variant                                                                                    |
| rs1277010675 | upstream_transcript_variant,2KB_upstream_variant,intron_variant,genic_upstream_transcript_variant |
| rs1277023162 | intron_variant                                                                                    |
| rs1277039666 | intron_variant                                                                                    |
| rs1277052613 | upstream_transcript_variant,intron_variant,genic_upstream_transcript_variant                      |
| rs1277060801 | upstream_transcript_variant,intron_variant,genic_upstream_transcript_variant                      |
| rs1277067723 | intron_variant,genic_upstream_transcript_variant                                                  |
| rs1277078629 | intron_variant,genic_upstream_transcript_variant                                                  |
| rs1277104433 | genic_downstream_transcript_variant,intron_variant                                                |
| rs1277111038 | intron_variant,genic_upstream_transcript_variant                                                  |
| rs1277119952 | intron_variant,genic_upstream_transcript_variant                                                  |
| rs1277143361 | genic_downstream_transcript_variant,intron_variant                                                |
| rs1277144210 | upstream_transcript_variant,intron_variant,genic_upstream_transcript_variant                      |
| rs1277153504 | genic_downstream_transcript_variant,intron_variant                                                |
| rs1277209546 | intron_variant,genic_upstream_transcript_variant                                                  |
| rs1277209638 | genic_downstream_transcript_variant,intron_variant                                                |
| rs1277226606 | intron_variant                                                                                    |
| rs1277269145 | intron_variant                                                                                    |
| rs1277293299 | genic_downstream_transcript_variant,intron_variant                                                |
| rs1277297003 | intron_variant                                                                                    |
| rs1277298967 | intron_variant                                                                                    |
| rs1277331731 | upstream_transcript_variant,intron_variant,genic_upstream_transcript_variant,2KB_upstream_variant |
| rs1277365079 | genic_downstream_transcript_variant,intron_variant                                                |
| rs1277377886 | intron_variant,genic_upstream_transcript_variant                                                  |
| rs1277390214 | upstream_transcript_variant,intron_variant,genic_upstream_transcript_variant,2KB_upstream_variant |
| rs1277411587 | genic_downstream_transcript_variant,intron_variant                                                |
| rs1277417440 | intron_variant                                                                                    |
| rs1277427459 | genic_downstream_transcript_variant,intron_variant                                                |
| rs1277442958 | intron_variant,genic_upstream_transcript_variant                                                  |
| rs1277462520 | intron_variant                                                                                    |

|              |                                                                                                   |
|--------------|---------------------------------------------------------------------------------------------------|
| rs1277472557 | intron_variant                                                                                    |
| rs1277491107 | genic_downstream_transcript_variant,intron_variant                                                |
| rs1277522171 | intron_variant,genic_upstream_transcript_variant                                                  |
| rs1277559477 | intron_variant                                                                                    |
| rs1277579784 | intron_variant,genic_upstream_transcript_variant                                                  |
| rs1277599833 | genic_downstream_transcript_variant,intron_variant                                                |
| rs1277612411 | genic_downstream_transcript_variant,intron_variant                                                |
| rs1277649454 | genic_downstream_transcript_variant,intron_variant                                                |
| rs1277651598 | intron_variant                                                                                    |
| rs1277656752 | intron_variant,genic_upstream_transcript_variant                                                  |
| rs1277720860 | intron_variant                                                                                    |
| rs1277723870 | intron_variant                                                                                    |
| rs1277741585 | genic_downstream_transcript_variant,intron_variant                                                |
| rs1277772381 | intron_variant                                                                                    |
| rs1277775525 | intron_variant                                                                                    |
| rs1277795347 | intron_variant,genic_upstream_transcript_variant                                                  |
| rs1277831483 | intron_variant                                                                                    |
| rs1277921231 | intron_variant,genic_upstream_transcript_variant                                                  |
| rs1277934472 | genic_downstream_transcript_variant,intron_variant                                                |
| rs1277944693 | intron_variant,genic_upstream_transcript_variant                                                  |
| rs1277970331 | intron_variant                                                                                    |
| rs1277972584 | intron_variant,genic_upstream_transcript_variant                                                  |
| rs1277997460 | intron_variant                                                                                    |
| rs1277998285 | genic_downstream_transcript_variant,intron_variant                                                |
| rs1278009708 | genic_downstream_transcript_variant,intron_variant                                                |
| rs1278027483 | intron_variant,genic_upstream_transcript_variant                                                  |
| rs1278084939 | intron_variant                                                                                    |
| rs1278136729 | intron_variant                                                                                    |
| rs1278149539 | intron_variant,genic_upstream_transcript_variant                                                  |
| rs1278161224 | intron_variant                                                                                    |
| rs1278162995 | intron_variant                                                                                    |
| rs1278170000 | intron_variant,genic_upstream_transcript_variant                                                  |
| rs1278181669 | genic_downstream_transcript_variant,intron_variant                                                |
| rs1278188090 | intron_variant                                                                                    |
| rs1278191312 | genic_downstream_transcript_variant,intron_variant                                                |
| rs1278246902 | intron_variant,genic_upstream_transcript_variant                                                  |
| rs1278247606 | upstream_transcript_variant,5_prime_UTR_variant,intron_variant,genic_upstream_transcript_variant  |
| rs1278266970 | intron_variant                                                                                    |
| rs1278299668 | genic_downstream_transcript_variant,intron_variant                                                |
| rs1278327101 | intron_variant,genic_upstream_transcript_variant                                                  |
| rs1278355739 | intron_variant                                                                                    |
| rs1278381639 | genic_downstream_transcript_variant,intron_variant                                                |
| rs1278480721 | intron_variant,genic_upstream_transcript_variant                                                  |
| rs1278509873 | upstream_transcript_variant,intron_variant,genic_upstream_transcript_variant,2KB_upstream_variant |
| rs1278519265 | non_coding_transcript_variant,genic_downstream_transcript_variant,3_prime_UTR_variant             |
| rs1278572217 | intron_variant,genic_upstream_transcript_variant                                                  |
| rs1278582969 | intron_variant,genic_upstream_transcript_variant                                                  |
| rs1278589356 | intron_variant                                                                                    |
| rs1278607916 | intron_variant,genic_upstream_transcript_variant                                                  |
| rs1278621285 | genic_downstream_transcript_variant,intron_variant                                                |
| rs1278662383 | intron_variant,genic_upstream_transcript_variant                                                  |
| rs1278683289 | intron_variant,genic_upstream_transcript_variant                                                  |
| rs1278690740 | intron_variant                                                                                    |
| rs1278699328 | intron_variant,genic_upstream_transcript_variant                                                  |
| rs1278700449 | intron_variant,genic_upstream_transcript_variant                                                  |
| rs1278730439 | upstream_transcript_variant,intron_variant,genic_upstream_transcript_variant,2KB_upstream_variant |
| rs1278777062 | intron_variant                                                                                    |
| rs1278807556 | upstream_transcript_variant,intron_variant,genic_upstream_transcript_variant                      |
| rs1278837822 | intron_variant                                                                                    |
| rs1278862804 | intron_variant                                                                                    |
| rs1278901075 | genic_downstream_transcript_variant,intron_variant                                                |
| rs1278914912 | upstream_transcript_variant,intron_variant,genic_upstream_transcript_variant,2KB_upstream_variant |
| rs1278974934 | intron_variant,genic_upstream_transcript_variant                                                  |
| rs1278990580 | upstream_transcript_variant,intron_variant,genic_upstream_transcript_variant                      |
| rs1278995056 | intron_variant,genic_upstream_transcript_variant                                                  |
| rs1279008898 | intron_variant                                                                                    |
| rs1279012305 | intron_variant                                                                                    |
| rs1279078055 | intron_variant,genic_upstream_transcript_variant                                                  |
| rs1279083186 | intron_variant                                                                                    |
| rs1279168775 | intron_variant,genic_upstream_transcript_variant                                                  |
| rs1279178324 | intron_variant,genic_upstream_transcript_variant                                                  |
| rs1279183241 | intron_variant,genic_upstream_transcript_variant                                                  |
| rs1279309129 | intron_variant,genic_upstream_transcript_variant                                                  |
| rs1279314106 | intron_variant,genic_upstream_transcript_variant                                                  |

|              |                                                                                                   |
|--------------|---------------------------------------------------------------------------------------------------|
| rs1279345802 | intron_variant                                                                                    |
| rs1279375870 | intron_variant                                                                                    |
| rs1279385571 | intron_variant,genic_upstream_transcript_variant                                                  |
| rs1279427840 | intron_variant,genic_upstream_transcript_variant                                                  |
| rs1279501309 | intron_variant                                                                                    |
| rs1279526015 | intron_variant                                                                                    |
| rs1279603875 | intron_variant,genic_upstream_transcript_variant                                                  |
| rs1279614924 | intron_variant                                                                                    |
| rs1279616540 | intron_variant                                                                                    |
| rs1279628429 | intron_variant,genic_upstream_transcript_variant                                                  |
| rs1279634913 | intron_variant                                                                                    |
| rs1279655452 | genic_downstream_transcript_variant,intron_variant                                                |
| rs1279681494 | intron_variant,genic_upstream_transcript_variant                                                  |
| rs1279685851 | intron_variant                                                                                    |
| rs1279686630 | intron_variant,genic_upstream_transcript_variant                                                  |
| rs1279695290 | intron_variant                                                                                    |
| rs1279722189 | genic_downstream_transcript_variant,intron_variant                                                |
| rs1279728514 | intron_variant,genic_upstream_transcript_variant                                                  |
| rs1279731627 | genic_downstream_transcript_variant,intron_variant                                                |
| rs1279760943 | upstream_transcript_variant,intron_variant,genic_upstream_transcript_variant,2KB_upstream_variant |
| rs1279766176 | intron_variant                                                                                    |
| rs1279791207 | intron_variant                                                                                    |
| rs1279813380 | intron_variant,genic_upstream_transcript_variant                                                  |
| rs1279834765 | genic_downstream_transcript_variant,intron_variant                                                |
| rs1279840256 | intron_variant                                                                                    |
| rs1279850324 | intron_variant                                                                                    |
| rs1279874180 | intron_variant,genic_upstream_transcript_variant                                                  |
| rs1279881447 | intron_variant,genic_upstream_transcript_variant                                                  |
| rs1279889665 | intron_variant,genic_upstream_transcript_variant                                                  |
| rs1279908242 | intron_variant                                                                                    |
| rs1279915286 | genic_downstream_transcript_variant,intron_variant                                                |
| rs1279957983 | intron_variant                                                                                    |
| rs1279984734 | intron_variant                                                                                    |
| rs1279990295 | genic_downstream_transcript_variant,intron_variant                                                |
| rs1280005196 | intron_variant,genic_upstream_transcript_variant                                                  |
| rs1280013458 | intron_variant                                                                                    |
| rs1280037748 | intron_variant                                                                                    |
| rs1280080393 | intron_variant                                                                                    |
| rs1280091054 | intron_variant                                                                                    |
| rs1280109095 | genic_downstream_transcript_variant,intron_variant                                                |
| rs1280127517 | intron_variant,genic_upstream_transcript_variant                                                  |
| rs1280146709 | intron_variant                                                                                    |
| rs1280163081 | intron_variant                                                                                    |
| rs1280164718 | upstream_transcript_variant,2KB_upstream_variant,intron_variant,genic_upstream_transcript_variant |
| rs1280179947 | intron_variant,genic_upstream_transcript_variant                                                  |
| rs1280182293 | intron_variant,genic_upstream_transcript_variant                                                  |
| rs1280185295 | intron_variant,genic_upstream_transcript_variant                                                  |
| rs1280200435 | intron_variant                                                                                    |
| rs1280202392 | upstream_transcript_variant,intron_variant,genic_upstream_transcript_variant                      |
| rs1280234542 | intron_variant,genic_upstream_transcript_variant                                                  |
| rs1280253255 | intron_variant                                                                                    |
| rs1280283658 | genic_downstream_transcript_variant,intron_variant                                                |
| rs1280315927 | intron_variant                                                                                    |
| rs1280323416 | intron_variant,genic_upstream_transcript_variant                                                  |
| rs1280329877 | genic_downstream_transcript_variant,intron_variant                                                |
| rs1280353352 | genic_downstream_transcript_variant,intron_variant                                                |
| rs1280365415 | intron_variant,genic_upstream_transcript_variant                                                  |
| rs1280368838 | intron_variant,genic_upstream_transcript_variant                                                  |
| rs1280392223 | intron_variant,genic_upstream_transcript_variant                                                  |
| rs1280403460 | genic_downstream_transcript_variant,intron_variant                                                |
| rs1280404179 | intron_variant                                                                                    |
| rs1280413678 | intron_variant                                                                                    |
| rs1280439431 | intron_variant                                                                                    |
| rs1280439917 | intron_variant,genic_upstream_transcript_variant                                                  |
| rs1280451611 | 500B_downstream_variant,downstream_transcript_variant                                             |
| rs1280469555 | intron_variant                                                                                    |
| rs1280477599 | intron_variant                                                                                    |
| rs1280499789 | genic_downstream_transcript_variant,intron_variant                                                |
| rs1280507718 | intron_variant,genic_upstream_transcript_variant                                                  |
| rs1280533370 | intron_variant                                                                                    |
| rs1280608441 | intron_variant,genic_upstream_transcript_variant                                                  |
| rs1280621026 | intron_variant                                                                                    |
| rs1280625230 | genic_downstream_transcript_variant,intron_variant                                                |
| rs1280677004 | intron_variant,genic_upstream_transcript_variant                                                  |

|              |                                                                                                                           |
|--------------|---------------------------------------------------------------------------------------------------------------------------|
| rs1280722934 | intron_variant                                                                                                            |
| rs1280782616 | intron_variant                                                                                                            |
| rs1280813136 | intron_variant                                                                                                            |
| rs1280848117 | intron_variant                                                                                                            |
| rs1280865187 | intron_variant,genic_upstream_transcript_variant                                                                          |
| rs1280876929 | intron_variant                                                                                                            |
| rs1280927746 | intron_variant,genic_upstream_transcript_variant                                                                          |
| rs1280997418 | intron_variant,genic_upstream_transcript_variant                                                                          |
| rs1281008331 | intron_variant                                                                                                            |
| rs1281024827 | intron_variant,genic_upstream_transcript_variant                                                                          |
| rs1281050708 | non_coding_transcript_variant,5_prime_UTR_variant,intron_variant,genic_upstream_transcript_variant                        |
| rs1281054035 | intron_variant                                                                                                            |
| rs1281099493 | genic_downstream_transcript_variant,intron_variant                                                                        |
| rs1281101051 | intron_variant,genic_upstream_transcript_variant                                                                          |
| rs1281107245 | intron_variant                                                                                                            |
| rs1281119923 | intron_variant                                                                                                            |
| rs1281121858 | upstream_transcript_variant,2KB_upstream_variant,intron_variant,genic_upstream_transcript_variant                         |
| rs1281163852 | genic_downstream_transcript_variant,intron_variant                                                                        |
| rs1281185321 | intron_variant                                                                                                            |
| rs1281246327 | intron_variant,genic_upstream_transcript_variant                                                                          |
| rs1281264563 | upstream_transcript_variant,intron_variant,genic_upstream_transcript_variant                                              |
| rs1281277752 | intron_variant                                                                                                            |
| rs1281299481 | intron_variant,genic_upstream_transcript_variant                                                                          |
| rs1281306051 | intron_variant                                                                                                            |
| rs1281319411 | intron_variant,genic_upstream_transcript_variant                                                                          |
| rs1281327418 | intron_variant,genic_upstream_transcript_variant                                                                          |
| rs1281330823 | intron_variant                                                                                                            |
| rs1281370096 | intron_variant,genic_upstream_transcript_variant                                                                          |
| rs1281373178 | intron_variant                                                                                                            |
| rs1281387954 | genic_downstream_transcript_variant,intron_variant                                                                        |
| rs1281418934 | intron_variant,genic_upstream_transcript_variant                                                                          |
| rs1281432191 | intron_variant,genic_upstream_transcript_variant                                                                          |
| rs1281438118 | upstream_transcript_variant,intron_variant,genic_upstream_transcript_variant,2KB_upstream_variant                         |
| rs1281446375 | intron_variant                                                                                                            |
| rs1281454176 | intron_variant,genic_upstream_transcript_variant                                                                          |
| rs1281480342 | intron_variant                                                                                                            |
| rs1281512769 | intron_variant,genic_upstream_transcript_variant                                                                          |
| rs1281538374 | intron_variant                                                                                                            |
| rs1281541939 | genic_downstream_transcript_variant,intron_variant                                                                        |
| rs1281565512 | intron_variant                                                                                                            |
| rs1281595146 | intron_variant,genic_upstream_transcript_variant                                                                          |
| rs1281598502 | intron_variant                                                                                                            |
| rs1281654180 | genic_downstream_transcript_variant,intron_variant                                                                        |
| rs1281663962 | genic_downstream_transcript_variant,intron_variant                                                                        |
| rs1281669691 | intron_variant                                                                                                            |
| rs1281733180 | intron_variant,genic_upstream_transcript_variant                                                                          |
| rs1281739381 | genic_downstream_transcript_variant,intron_variant                                                                        |
| rs1281748256 | intron_variant,genic_upstream_transcript_variant                                                                          |
| rs1281772042 | frameshift_variant,non_coding_transcript_variant,coding_sequence_variant,intron_variant,genic_upstream_transcript_variant |
| rs1281774087 | intron_variant                                                                                                            |
| rs1281799148 | genic_downstream_transcript_variant,intron_variant                                                                        |
| rs1281860482 | non_coding_transcript_variant,synonymous_variant,coding_sequence_variant                                                  |
| rs1281879668 | intron_variant,genic_upstream_transcript_variant                                                                          |
| rs1281891321 | genic_downstream_transcript_variant,intron_variant                                                                        |
| rs1281897645 | genic_downstream_transcript_variant,intron_variant,downstream_transcript_variant                                          |
| rs1281936082 | upstream_transcript_variant,intron_variant,genic_upstream_transcript_variant                                              |
| rs1281956324 | intron_variant                                                                                                            |
| rs1282015697 | intron_variant,genic_upstream_transcript_variant                                                                          |
| rs1282019505 | intron_variant,genic_upstream_transcript_variant                                                                          |
| rs1282050234 | intron_variant                                                                                                            |
| rs1282104503 | intron_variant                                                                                                            |
| rs1282108738 | intron_variant,genic_upstream_transcript_variant                                                                          |
| rs1282140178 | genic_downstream_transcript_variant,intron_variant                                                                        |
| rs1282168201 | intron_variant,genic_upstream_transcript_variant                                                                          |
| rs1282168364 | genic_downstream_transcript_variant,intron_variant                                                                        |
| rs1282238947 | intron_variant,genic_upstream_transcript_variant                                                                          |
| rs1282242060 | intron_variant                                                                                                            |
| rs1282244470 | genic_downstream_transcript_variant,intron_variant                                                                        |
| rs1282251378 | intron_variant,genic_upstream_transcript_variant                                                                          |
| rs1282257537 | intron_variant,genic_upstream_transcript_variant                                                                          |
| rs1282271380 | upstream_transcript_variant,intron_variant,genic_upstream_transcript_variant                                              |
| rs1282321478 | intron_variant                                                                                                            |
| rs1282338832 | intron_variant,genic_upstream_transcript_variant                                                                          |
| rs1282343552 | intron_variant,genic_upstream_transcript_variant                                                                          |

|              |                                                                                                                           |
|--------------|---------------------------------------------------------------------------------------------------------------------------|
| rs1282379409 | upstream_transcript_variant,2KB_upstream_variant,intron_variant,genic_upstream_transcript_variant                         |
| rs1282393033 | intron_variant,genic_upstream_transcript_variant                                                                          |
| rs1282428483 | intron_variant                                                                                                            |
| rs1282447446 | intron_variant                                                                                                            |
| rs1282449283 | intron_variant,genic_upstream_transcript_variant                                                                          |
| rs1282492265 | genic_downstream_transcript_variant,intron_variant                                                                        |
| rs1282501409 | genic_downstream_transcript_variant,intron_variant                                                                        |
| rs1282535840 | intron_variant,genic_upstream_transcript_variant                                                                          |
| rs1282577549 | intron_variant                                                                                                            |
| rs1282580231 | intron_variant,genic_upstream_transcript_variant                                                                          |
| rs1282622468 | intron_variant                                                                                                            |
| rs1282654244 | intron_variant                                                                                                            |
| rs1282698340 | intron_variant                                                                                                            |
| rs1282701050 | genic_downstream_transcript_variant,intron_variant                                                                        |
| rs1282703470 | genic_downstream_transcript_variant,intron_variant                                                                        |
| rs1282709062 | intron_variant,genic_upstream_transcript_variant                                                                          |
| rs1282716584 | missense_variant,non_coding_transcript_variant,coding_sequence_variant,intron_variant,genic_upstream_transcript_variant   |
| rs1282745722 | intron_variant,genic_upstream_transcript_variant                                                                          |
| rs1282795450 | intron_variant,genic_upstream_transcript_variant                                                                          |
| rs1282813582 | genic_downstream_transcript_variant,intron_variant                                                                        |
| rs1282843185 | intron_variant                                                                                                            |
| rs1282845389 | genic_downstream_transcript_variant,intron_variant                                                                        |
| rs1282865339 | intron_variant                                                                                                            |
| rs1282926304 | intron_variant,genic_upstream_transcript_variant                                                                          |
| rs1282980380 | intron_variant,genic_upstream_transcript_variant                                                                          |
| rs1282984968 | intron_variant,genic_upstream_transcript_variant                                                                          |
| rs1282994326 | intron_variant                                                                                                            |
| rs1283007648 | intron_variant,genic_upstream_transcript_variant                                                                          |
| rs1283022158 | intron_variant                                                                                                            |
| rs1283026928 | intron_variant                                                                                                            |
| rs1283080503 | intron_variant                                                                                                            |
| rs1283089076 | intron_variant                                                                                                            |
| rs1283118901 | intron_variant                                                                                                            |
| rs1283124915 | intron_variant                                                                                                            |
| rs1283168380 | intron_variant                                                                                                            |
| rs1283193919 | synonymous_variant,non_coding_transcript_variant,coding_sequence_variant,intron_variant,genic_upstream_transcript_variant |
| rs1283205419 | non_coding_transcript_variant,missense_variant,genic_downstream_transcript_variant,coding_sequence_variant                |
| rs1283260041 | intron_variant                                                                                                            |
| rs1283286175 | intron_variant                                                                                                            |
| rs1283312333 | intron_variant                                                                                                            |
| rs1283394226 | intron_variant,genic_upstream_transcript_variant                                                                          |
| rs1283410383 | genic_downstream_transcript_variant,intron_variant                                                                        |
| rs1283452666 | intron_variant,genic_upstream_transcript_variant                                                                          |
| rs1283503003 | intron_variant                                                                                                            |
| rs1283503776 | genic_downstream_transcript_variant,intron_variant                                                                        |
| rs1283510023 | intron_variant,genic_upstream_transcript_variant                                                                          |
| rs1283518529 | intron_variant                                                                                                            |
| rs1283530638 | genic_downstream_transcript_variant,intron_variant                                                                        |
| rs1283546203 | intron_variant,genic_upstream_transcript_variant                                                                          |
| rs1283567679 | intron_variant                                                                                                            |
| rs1283575333 | intron_variant                                                                                                            |
| rs1283602430 | upstream_transcript_variant,intron_variant,genic_upstream_transcript_variant                                              |
| rs1283610015 | genic_downstream_transcript_variant,intron_variant                                                                        |
| rs1283618504 | intron_variant,genic_upstream_transcript_variant                                                                          |
| rs1283673714 | genic_downstream_transcript_variant,intron_variant                                                                        |
| rs1283721322 | intron_variant                                                                                                            |
| rs1283768274 | intron_variant                                                                                                            |
| rs1283808683 | 2KB_upstream_variant,upstream_transcript_variant,intron_variant,genic_upstream_transcript_variant                         |
| rs1283841195 | genic_downstream_transcript_variant,intron_variant                                                                        |
| rs1283855654 | upstream_transcript_variant,intron_variant,genic_upstream_transcript_variant                                              |
| rs1283865297 | intron_variant,genic_upstream_transcript_variant                                                                          |
| rs1283891978 | intron_variant,genic_upstream_transcript_variant                                                                          |
| rs1283937259 | intron_variant,genic_upstream_transcript_variant                                                                          |
| rs1283943833 | intron_variant                                                                                                            |
| rs1283971109 | intron_variant,genic_upstream_transcript_variant                                                                          |
| rs1283985912 | genic_downstream_transcript_variant,intron_variant                                                                        |
| rs1284047306 | intron_variant                                                                                                            |
| rs1284068993 | genic_downstream_transcript_variant,intron_variant                                                                        |
| rs1284084342 | genic_downstream_transcript_variant,intron_variant                                                                        |
| rs1284142413 | intron_variant                                                                                                            |
| rs1284168468 | intron_variant                                                                                                            |
| rs1284192243 | intron_variant,genic_upstream_transcript_variant                                                                          |
| rs1284246792 | genic_downstream_transcript_variant,intron_variant                                                                        |
| rs1284312324 | intron_variant,genic_upstream_transcript_variant                                                                          |

|              |                                                                                                                           |
|--------------|---------------------------------------------------------------------------------------------------------------------------|
| rs1284355125 | intron_variant                                                                                                            |
| rs1284388875 | intron_variant,genic_upstream_transcript_variant                                                                          |
| rs1284408966 | genic_downstream_transcript_variant,intron_variant                                                                        |
| rs1284415718 | upstream_transcript_variant,intron_variant,genic_upstream_transcript_variant                                              |
| rs1284434363 | intron_variant,genic_upstream_transcript_variant                                                                          |
| rs1284441190 | intron_variant,genic_upstream_transcript_variant                                                                          |
| rs1284446344 | intron_variant                                                                                                            |
| rs1284507952 | intron_variant                                                                                                            |
| rs1284539964 | genic_downstream_transcript_variant,non_coding_transcript_variant,synonymous_variant,coding_sequence_variant              |
| rs1284548430 | intron_variant,genic_upstream_transcript_variant                                                                          |
| rs1284548526 | intron_variant,genic_upstream_transcript_variant                                                                          |
| rs1284565671 | intron_variant                                                                                                            |
| rs1284578089 | intron_variant,genic_upstream_transcript_variant                                                                          |
| rs1284593490 | genic_downstream_transcript_variant,intron_variant                                                                        |
| rs1284597044 | genic_downstream_transcript_variant,intron_variant                                                                        |
| rs1284672128 | intron_variant,genic_upstream_transcript_variant                                                                          |
| rs1284689183 | genic_downstream_transcript_variant,intron_variant                                                                        |
| rs1284703751 | genic_downstream_transcript_variant,intron_variant                                                                        |
| rs1284734136 | intron_variant,genic_upstream_transcript_variant                                                                          |
| rs1284750228 | intron_variant,genic_upstream_transcript_variant                                                                          |
| rs1284751940 | genic_downstream_transcript_variant,intron_variant                                                                        |
| rs1284768160 | intron_variant                                                                                                            |
| rs1284770690 | intron_variant,genic_upstream_transcript_variant                                                                          |
| rs1284774153 | intron_variant                                                                                                            |
| rs1284783062 | intron_variant,genic_upstream_transcript_variant                                                                          |
| rs1284819948 | intron_variant                                                                                                            |
| rs1284835826 | intron_variant                                                                                                            |
| rs1284852036 | intron_variant,genic_upstream_transcript_variant                                                                          |
| rs1284872223 | intron_variant,genic_upstream_transcript_variant                                                                          |
| rs1284886370 | intron_variant,genic_upstream_transcript_variant                                                                          |
| rs1284899517 | genic_downstream_transcript_variant,intron_variant                                                                        |
| rs1284910416 | intron_variant,genic_upstream_transcript_variant                                                                          |
| rs1284979559 | genic_downstream_transcript_variant,intron_variant                                                                        |
| rs1285023238 | intron_variant,genic_upstream_transcript_variant                                                                          |
| rs1285027278 | intron_variant,genic_upstream_transcript_variant                                                                          |
| rs1285050439 | 2KB_upstream_variant,upstream_transcript_variant,intron_variant,genic_upstream_transcript_variant                         |
| rs1285107313 | genic_downstream_transcript_variant,3_prime_UTR_variant,non_coding_transcript_variant                                     |
| rs1285107403 | intron_variant                                                                                                            |
| rs1285120914 | intron_variant,genic_upstream_transcript_variant                                                                          |
| rs1285136432 | intron_variant                                                                                                            |
| rs1285143621 | intron_variant                                                                                                            |
| rs1285208468 | intron_variant,genic_upstream_transcript_variant                                                                          |
| rs1285271578 | intron_variant,genic_upstream_transcript_variant                                                                          |
| rs1285272487 | intron_variant,genic_upstream_transcript_variant                                                                          |
| rs1285331586 | intron_variant                                                                                                            |
| rs1285344428 | intron_variant,genic_upstream_transcript_variant                                                                          |
| rs1285419473 | upstream_transcript_variant,intron_variant,genic_upstream_transcript_variant                                              |
| rs1285436453 | genic_downstream_transcript_variant,intron_variant                                                                        |
| rs1285504541 | intron_variant,genic_upstream_transcript_variant                                                                          |
| rs1285508873 | intron_variant,genic_upstream_transcript_variant                                                                          |
| rs1285517144 | intron_variant,genic_upstream_transcript_variant                                                                          |
| rs1285535822 | intron_variant,genic_upstream_transcript_variant                                                                          |
| rs1285597857 | genic_downstream_transcript_variant,intron_variant                                                                        |
| rs1285635871 | intron_variant                                                                                                            |
| rs1285659894 | intron_variant,genic_upstream_transcript_variant                                                                          |
| rs1285703107 | intron_variant                                                                                                            |
| rs1285707255 | intron_variant,genic_upstream_transcript_variant                                                                          |
| rs1285728876 | upstream_transcript_variant,intron_variant,genic_upstream_transcript_variant                                              |
| rs1285730150 | genic_downstream_transcript_variant,intron_variant                                                                        |
| rs1285731743 | genic_downstream_transcript_variant,intron_variant                                                                        |
| rs1285762910 | intron_variant,genic_upstream_transcript_variant                                                                          |
| rs1285805044 | intron_variant                                                                                                            |
| rs1285808715 | 2KB_upstream_variant,upstream_transcript_variant,intron_variant,genic_upstream_transcript_variant                         |
| rs1285814811 | non_coding_transcript_variant,coding_sequence_variant,intron_variant,synonymous_variant,genic_upstream_transcript_variant |
| rs1285834272 | intron_variant                                                                                                            |
| rs1285861148 | intron_variant,genic_upstream_transcript_variant                                                                          |
| rs1285882072 | genic_downstream_transcript_variant,non_coding_transcript_variant,synonymous_variant,coding_sequence_variant              |
| rs1285885083 | intron_variant,genic_upstream_transcript_variant                                                                          |
| rs1285886859 | genic_downstream_transcript_variant,intron_variant                                                                        |
| rs1285898840 | intron_variant,genic_upstream_transcript_variant                                                                          |
| rs1285934494 | intron_variant,genic_upstream_transcript_variant                                                                          |
| rs1285948685 | intron_variant                                                                                                            |
| rs1285969030 | genic_downstream_transcript_variant,intron_variant                                                                        |
| rs1285969294 | intron_variant                                                                                                            |

|              |                                                                                                            |
|--------------|------------------------------------------------------------------------------------------------------------|
| rs1286032387 | intron_variant,genic_upstream_transcript_variant                                                           |
| rs1286049811 | intron_variant,genic_upstream_transcript_variant                                                           |
| rs1286056026 | genic_downstream_transcript_variant,intron_variant                                                         |
| rs1286089686 | intron_variant,genic_upstream_transcript_variant                                                           |
| rs1286108139 | genic_downstream_transcript_variant,intron_variant                                                         |
| rs1286114427 | intron_variant,genic_upstream_transcript_variant                                                           |
| rs1286148199 | intron_variant,genic_upstream_transcript_variant                                                           |
| rs1286168412 | intron_variant,genic_upstream_transcript_variant                                                           |
| rs1286280181 | intron_variant                                                                                             |
| rs1286295576 | intron_variant,genic_upstream_transcript_variant                                                           |
| rs1286303343 | intron_variant,genic_upstream_transcript_variant                                                           |
| rs1286307221 | intron_variant                                                                                             |
| rs1286336446 | intron_variant                                                                                             |
| rs1286383884 | intron_variant,genic_upstream_transcript_variant                                                           |
| rs1286392674 | intron_variant                                                                                             |
| rs1286410665 | intron_variant                                                                                             |
| rs1286425611 | intron_variant,genic_upstream_transcript_variant                                                           |
| rs1286429727 | genic_downstream_transcript_variant,intron_variant                                                         |
| rs1286463225 | genic_downstream_transcript_variant,intron_variant                                                         |
| rs1286470576 | genic_downstream_transcript_variant,intron_variant                                                         |
| rs1286515581 | intron_variant                                                                                             |
| rs1286558982 | intron_variant                                                                                             |
| rs1286579416 | intron_variant,genic_upstream_transcript_variant                                                           |
| rs1286615677 | intron_variant,genic_upstream_transcript_variant                                                           |
| rs1286621135 | intron_variant                                                                                             |
| rs1286623650 | intron_variant                                                                                             |
| rs1286628046 | intron_variant,genic_upstream_transcript_variant                                                           |
| rs1286648579 | intron_variant,genic_upstream_transcript_variant                                                           |
| rs1286675349 | intron_variant                                                                                             |
| rs1286690548 | intron_variant                                                                                             |
| rs1286699503 | 2KB_upstream_variant,upstream_transcript_variant,intron_variant,genic_upstream_transcript_variant          |
| rs1286727983 | intron_variant                                                                                             |
| rs1286750638 | intron_variant,genic_upstream_transcript_variant                                                           |
| rs1286754741 | missense_variant,genic_downstream_transcript_variant,non_coding_transcript_variant,coding_sequence_variant |
| rs1286810875 | intron_variant,genic_upstream_transcript_variant                                                           |
| rs1286844084 | 2KB_upstream_variant,upstream_transcript_variant,intron_variant,genic_upstream_transcript_variant          |
| rs1286855905 | intron_variant,genic_upstream_transcript_variant                                                           |
| rs1286864691 | intron_variant,genic_upstream_transcript_variant                                                           |
| rs1286865994 | intron_variant,genic_upstream_transcript_variant                                                           |
| rs1286867856 | 2KB_upstream_variant,upstream_transcript_variant,intron_variant,genic_upstream_transcript_variant          |
| rs1286873438 | intron_variant                                                                                             |
| rs1286921734 | missense_variant,genic_downstream_transcript_variant,non_coding_transcript_variant,coding_sequence_variant |
| rs1286956397 | intron_variant,genic_upstream_transcript_variant                                                           |
| rs1287005793 | intron_variant,genic_upstream_transcript_variant                                                           |
| rs1287045050 | intron_variant                                                                                             |
| rs1287077050 | intron_variant,genic_upstream_transcript_variant                                                           |
| rs1287086268 | intron_variant                                                                                             |
| rs1287177207 | 2KB_upstream_variant,upstream_transcript_variant,intron_variant,genic_upstream_transcript_variant          |
| rs1287293358 | intron_variant                                                                                             |
| rs1287311800 | intron_variant                                                                                             |
| rs1287314329 | intron_variant,genic_upstream_transcript_variant                                                           |
| rs1287340050 | intron_variant,genic_upstream_transcript_variant                                                           |
| rs1287359148 | intron_variant                                                                                             |
| rs1287430006 | 2KB_upstream_variant,upstream_transcript_variant,intron_variant,genic_upstream_transcript_variant          |
| rs1287434452 | 2KB_upstream_variant,upstream_transcript_variant,intron_variant,genic_upstream_transcript_variant          |
| rs1287445972 | genic_downstream_transcript_variant,intron_variant                                                         |
| rs1287449571 | intron_variant,genic_upstream_transcript_variant                                                           |
| rs1287467579 | intron_variant,genic_upstream_transcript_variant                                                           |
| rs1287471560 | intron_variant,genic_upstream_transcript_variant                                                           |
| rs1287523485 | intron_variant,genic_upstream_transcript_variant                                                           |
| rs1287543820 | upstream_transcript_variant,intron_variant,genic_upstream_transcript_variant                               |
| rs1287580062 | intron_variant,genic_upstream_transcript_variant                                                           |
| rs1287589229 | intron_variant,genic_upstream_transcript_variant                                                           |
| rs1287611749 | intron_variant,genic_upstream_transcript_variant                                                           |
| rs1287619412 | intron_variant                                                                                             |
| rs1287623350 | intron_variant,genic_upstream_transcript_variant                                                           |
| rs1287669352 | intron_variant,genic_upstream_transcript_variant                                                           |
| rs1287702840 | intron_variant,genic_upstream_transcript_variant                                                           |
| rs1287705881 | intron_variant                                                                                             |
| rs1287713346 | missense_variant,non_coding_transcript_variant,coding_sequence_variant                                     |
| rs1287728252 | intron_variant                                                                                             |
| rs1287746166 | intron_variant                                                                                             |
| rs1287756510 | genic_downstream_transcript_variant,intron_variant                                                         |
| rs1287767258 | intron_variant,genic_upstream_transcript_variant                                                           |

|              |                                                                                                   |
|--------------|---------------------------------------------------------------------------------------------------|
| rs1287798056 | genic_downstream_transcript_variant,intron_variant                                                |
| rs1287804526 | intron_variant                                                                                    |
| rs1287844092 | intron_variant,genic_upstream_transcript_variant                                                  |
| rs1287863113 | genic_downstream_transcript_variant,intron_variant                                                |
| rs1287870131 | intron_variant,genic_upstream_transcript_variant                                                  |
| rs1287884896 | intron_variant,genic_upstream_transcript_variant                                                  |
| rs1287889627 | genic_downstream_transcript_variant,intron_variant                                                |
| rs1287897336 | genic_downstream_transcript_variant,3_prime_UTR_variant,non_coding_transcript_variant             |
| rs1287941977 | intron_variant                                                                                    |
| rs1287955166 | intron_variant,genic_upstream_transcript_variant                                                  |
| rs1288025184 | genic_downstream_transcript_variant,intron_variant                                                |
| rs1288060370 | intron_variant,genic_upstream_transcript_variant                                                  |
| rs1288074173 | intron_variant                                                                                    |
| rs1288117967 | upstream_transcript_variant,intron_variant,genic_upstream_transcript_variant                      |
| rs1288127047 | intron_variant,genic_upstream_transcript_variant                                                  |
| rs1288130005 | genic_downstream_transcript_variant,intron_variant                                                |
| rs1288133932 | intron_variant,genic_upstream_transcript_variant                                                  |
| rs1288152479 | genic_downstream_transcript_variant,intron_variant                                                |
| rs1288173120 | intron_variant,genic_upstream_transcript_variant                                                  |
| rs1288173385 | genic_downstream_transcript_variant,intron_variant                                                |
| rs1288210811 | 2KB_upstream_variant,upstream_transcript_variant,intron_variant,genic_upstream_transcript_variant |
| rs1288273663 | genic_downstream_transcript_variant,intron_variant                                                |
| rs1288300392 | genic_downstream_transcript_variant,intron_variant                                                |
| rs1288324061 | genic_downstream_transcript_variant,intron_variant                                                |
| rs1288329194 | intron_variant                                                                                    |
| rs1288361160 | genic_downstream_transcript_variant,intron_variant                                                |
| rs1288415206 | intron_variant,genic_upstream_transcript_variant                                                  |
| rs1288420616 | intron_variant                                                                                    |
| rs1288425843 | intron_variant,genic_upstream_transcript_variant                                                  |
| rs1288461236 | intron_variant                                                                                    |
| rs1288477621 | missense_variant,non_coding_transcript_variant,coding_sequence_variant                            |
| rs1288497665 | genic_downstream_transcript_variant,intron_variant                                                |
| rs1288509480 | intron_variant,genic_upstream_transcript_variant                                                  |
| rs1288511499 | intron_variant                                                                                    |
| rs1288541247 | upstream_transcript_variant,intron_variant,genic_upstream_transcript_variant                      |
| rs1288544058 | intron_variant                                                                                    |
| rs1288574667 | intron_variant,genic_upstream_transcript_variant                                                  |
| rs1288576355 | intron_variant                                                                                    |
| rs1288625626 | intron_variant                                                                                    |
| rs1288678213 | intron_variant                                                                                    |
| rs1288686098 | genic_downstream_transcript_variant,3_prime_UTR_variant,non_coding_transcript_variant             |
| rs1288719074 | intron_variant,genic_upstream_transcript_variant                                                  |
| rs1288736024 | genic_downstream_transcript_variant,intron_variant                                                |
| rs1288796369 | intron_variant,genic_upstream_transcript_variant                                                  |
| rs1288798752 | intron_variant                                                                                    |
| rs1288804179 | missense_variant,non_coding_transcript_variant,coding_sequence_variant                            |
| rs1288843237 | missense_variant,5_prime_UTR_variant,non_coding_transcript_variant,coding_sequence_variant        |
| rs1288850635 | upstream_transcript_variant,intron_variant,genic_upstream_transcript_variant                      |
| rs1288921729 | genic_downstream_transcript_variant,intron_variant                                                |
| rs1288941934 | intron_variant                                                                                    |
| rs1288970736 | intron_variant,genic_upstream_transcript_variant                                                  |
| rs1288993104 | 5_prime_UTR_variant,upstream_transcript_variant,intron_variant,genic_upstream_transcript_variant  |
| rs1289025289 | genic_downstream_transcript_variant,intron_variant                                                |
| rs1289109150 | genic_downstream_transcript_variant,intron_variant                                                |
| rs1289122927 | 2KB_upstream_variant,upstream_transcript_variant,intron_variant,genic_upstream_transcript_variant |
| rs1289141363 | genic_downstream_transcript_variant,intron_variant                                                |
| rs1289151667 | genic_downstream_transcript_variant,intron_variant                                                |
| rs1289170197 | genic_downstream_transcript_variant,intron_variant                                                |
| rs1289225276 | intron_variant,genic_upstream_transcript_variant                                                  |
| rs1289301201 | intron_variant                                                                                    |
| rs1289304740 | intron_variant,genic_upstream_transcript_variant                                                  |
| rs1289375343 | intron_variant,genic_upstream_transcript_variant                                                  |
| rs1289426113 | intron_variant                                                                                    |
| rs1289433626 | 2KB_upstream_variant,upstream_transcript_variant,intron_variant,genic_upstream_transcript_variant |
| rs1289435740 | intron_variant                                                                                    |
| rs1289441925 | intron_variant                                                                                    |
| rs1289453370 | intron_variant                                                                                    |
| rs1289491672 | intron_variant                                                                                    |
| rs1289519995 | intron_variant                                                                                    |
| rs1289545627 | intron_variant                                                                                    |
| rs1289548347 | genic_downstream_transcript_variant,intron_variant                                                |
| rs1289570763 | intron_variant,genic_upstream_transcript_variant                                                  |
| rs1289581175 | intron_variant                                                                                    |
| rs1289601470 | intron_variant,genic_upstream_transcript_variant                                                  |

|              |                                                                                                                           |
|--------------|---------------------------------------------------------------------------------------------------------------------------|
| rs1289610537 | intron_variant                                                                                                            |
| rs1289667027 | upstream_transcript_variant,intron_variant,genic_upstream_transcript_variant                                              |
| rs1289672936 | intron_variant,genic_upstream_transcript_variant                                                                          |
| rs1289689030 | intron_variant,genic_upstream_transcript_variant                                                                          |
| rs1289692037 | intron_variant                                                                                                            |
| rs1289697844 | missense_variant,non_coding_transcript_variant,coding_sequence_variant                                                    |
| rs1289703955 | intron_variant                                                                                                            |
| rs1289733281 | genic_downstream_transcript_variant,intron_variant                                                                        |
| rs1289734599 | intron_variant                                                                                                            |
| rs1289741596 | intron_variant,genic_upstream_transcript_variant                                                                          |
| rs1289752709 | intron_variant,genic_upstream_transcript_variant                                                                          |
| rs1289767590 | intron_variant                                                                                                            |
| rs1289787138 | intron_variant,genic_upstream_transcript_variant                                                                          |
| rs1289795258 | genic_downstream_transcript_variant,intron_variant                                                                        |
| rs1289831406 | intron_variant                                                                                                            |
| rs1289836269 | intron_variant                                                                                                            |
| rs1289838678 | intron_variant                                                                                                            |
| rs1289865204 | 2KB_upstream_variant,upstream_transcript_variant,intron_variant,genic_upstream_transcript_variant                         |
| rs1289959970 | intron_variant                                                                                                            |
| rs1289960557 | genic_downstream_transcript_variant,intron_variant                                                                        |
| rs1289962387 | intron_variant                                                                                                            |
| rs1289965025 | intron_variant,genic_upstream_transcript_variant                                                                          |
| rs1289983407 | intron_variant,genic_upstream_transcript_variant                                                                          |
| rs1290020505 | intron_variant                                                                                                            |
| rs1290026340 | intron_variant,genic_upstream_transcript_variant                                                                          |
| rs1290039988 | non_coding_transcript_variant,coding_sequence_variant,intron_variant,synonymous_variant,genic_upstream_transcript_variant |
| rs1290067267 | intron_variant,genic_upstream_transcript_variant                                                                          |
| rs1290103534 | intron_variant                                                                                                            |
| rs1290133060 | intron_variant,genic_upstream_transcript_variant                                                                          |
| rs1290139738 | genic_downstream_transcript_variant,3_prime_UTR_variant,non_coding_transcript_variant                                     |
| rs1290191273 | intron_variant                                                                                                            |
| rs1290266741 | intron_variant,genic_upstream_transcript_variant                                                                          |
| rs1290296325 | genic_downstream_transcript_variant,intron_variant                                                                        |
| rs1290308562 | intron_variant                                                                                                            |
| rs1290346315 | genic_downstream_transcript_variant,intron_variant                                                                        |
| rs1290346524 | missense_variant,non_coding_transcript_variant,coding_sequence_variant                                                    |
| rs1290348214 | intron_variant                                                                                                            |
| rs1290357124 | genic_downstream_transcript_variant,downstream_transcript_variant,intron_variant                                          |
| rs1290435208 | genic_downstream_transcript_variant,intron_variant                                                                        |
| rs1290445484 | intron_variant                                                                                                            |
| rs1290449854 | genic_downstream_transcript_variant,intron_variant                                                                        |
| rs1290518006 | intron_variant                                                                                                            |
| rs1290556224 | intron_variant,genic_upstream_transcript_variant                                                                          |
| rs1290577233 | intron_variant,genic_upstream_transcript_variant                                                                          |
| rs1290589440 | genic_downstream_transcript_variant,intron_variant                                                                        |
| rs1290614302 | intron_variant                                                                                                            |
| rs1290627957 | intron_variant,genic_upstream_transcript_variant                                                                          |
| rs1290743233 | intron_variant,genic_upstream_transcript_variant                                                                          |
| rs1290746165 | intron_variant,genic_upstream_transcript_variant                                                                          |
| rs1290808051 | intron_variant                                                                                                            |
| rs1290831460 | intron_variant,genic_upstream_transcript_variant                                                                          |
| rs1290879909 | intron_variant,genic_upstream_transcript_variant                                                                          |
| rs1290891402 | intron_variant,genic_upstream_transcript_variant                                                                          |
| rs1290913078 | intron_variant,genic_upstream_transcript_variant                                                                          |
| rs1290917552 | missense_variant,genic_downstream_transcript_variant,non_coding_transcript_variant,coding_sequence_variant                |
| rs1290919717 | intron_variant                                                                                                            |
| rs1290942818 | intron_variant,genic_upstream_transcript_variant                                                                          |
| rs1290981278 | upstream_transcript_variant,intron_variant,genic_upstream_transcript_variant                                              |
| rs1291023487 | genic_downstream_transcript_variant,intron_variant                                                                        |
| rs1291141844 | intron_variant,genic_upstream_transcript_variant                                                                          |
| rs1291142722 | intron_variant,genic_upstream_transcript_variant                                                                          |
| rs1291146785 | intron_variant,genic_upstream_transcript_variant                                                                          |
| rs1291174323 | intron_variant,genic_upstream_transcript_variant                                                                          |
| rs1291192893 | genic_downstream_transcript_variant,intron_variant                                                                        |
| rs1291195326 | intron_variant                                                                                                            |
| rs1291245134 | intron_variant,genic_upstream_transcript_variant                                                                          |
| rs1291249936 | intron_variant,genic_upstream_transcript_variant                                                                          |
| rs1291274502 | intron_variant,genic_upstream_transcript_variant                                                                          |
| rs1291296342 | intron_variant,genic_upstream_transcript_variant                                                                          |
| rs1291326178 | intron_variant                                                                                                            |
| rs1291329266 | intron_variant                                                                                                            |
| rs1291339327 | genic_downstream_transcript_variant,intron_variant                                                                        |
| rs1291375024 | intron_variant,genic_upstream_transcript_variant                                                                          |
| rs1291386679 | genic_downstream_transcript_variant,intron_variant                                                                        |

|              |                                                                                                   |
|--------------|---------------------------------------------------------------------------------------------------|
| rs1291424376 | intron_variant                                                                                    |
| rs1291428820 | intron_variant                                                                                    |
| rs1291490691 | genic_downstream_transcript_variant,intron_variant                                                |
| rs1291541736 | genic_downstream_transcript_variant,intron_variant                                                |
| rs1291544396 | intron_variant                                                                                    |
| rs1291590272 | intron_variant                                                                                    |
| rs1291594245 | genic_downstream_transcript_variant,intron_variant                                                |
| rs1291600493 | intron_variant                                                                                    |
| rs1291603995 | genic_downstream_transcript_variant,intron_variant                                                |
| rs1291673362 | intron_variant                                                                                    |
| rs1291695510 | intron_variant                                                                                    |
| rs1291695835 | intron_variant,genic_upstream_transcript_variant                                                  |
| rs1291706633 | intron_variant                                                                                    |
| rs1291709499 | intron_variant                                                                                    |
| rs1291789951 | intron_variant                                                                                    |
| rs1291837610 | intron_variant,genic_upstream_transcript_variant                                                  |
| rs1291860796 | intron_variant                                                                                    |
| rs1291899646 | intron_variant,genic_upstream_transcript_variant                                                  |
| rs1291984722 | intron_variant                                                                                    |
| rs1291995584 | intron_variant,genic_upstream_transcript_variant                                                  |
| rs1291999515 | intron_variant                                                                                    |
| rs1292030283 | upstream_transcript_variant,intron_variant,genic_upstream_transcript_variant                      |
| rs1292031212 | intron_variant,genic_upstream_transcript_variant                                                  |
| rs1292034686 | intron_variant,genic_upstream_transcript_variant                                                  |
| rs1292039375 | intron_variant,genic_upstream_transcript_variant                                                  |
| rs1292067972 | intron_variant                                                                                    |
| rs1292186674 | intron_variant                                                                                    |
| rs1292218089 | intron_variant,genic_upstream_transcript_variant                                                  |
| rs1292218982 | intron_variant                                                                                    |
| rs1292243824 | intron_variant                                                                                    |
| rs1292263943 | intron_variant,genic_upstream_transcript_variant                                                  |
| rs1292286021 | intron_variant,genic_upstream_transcript_variant                                                  |
| rs1292299145 | intron_variant,genic_upstream_transcript_variant                                                  |
| rs1292299439 | upstream_transcript_variant,intron_variant,genic_upstream_transcript_variant                      |
| rs1292324988 | intron_variant                                                                                    |
| rs1292326082 | intron_variant                                                                                    |
| rs1292384674 | genic_downstream_transcript_variant,intron_variant                                                |
| rs1292387014 | intron_variant,genic_upstream_transcript_variant                                                  |
| rs1292398565 | intron_variant                                                                                    |
| rs1292421465 | intron_variant                                                                                    |
| rs1292479477 | genic_downstream_transcript_variant,intron_variant                                                |
| rs1292484159 | intron_variant                                                                                    |
| rs1292497762 | intron_variant,genic_upstream_transcript_variant                                                  |
| rs1292511225 | intron_variant,genic_upstream_transcript_variant                                                  |
| rs1292520469 | intron_variant                                                                                    |
| rs1292545280 | intron_variant                                                                                    |
| rs1292577093 | genic_downstream_transcript_variant,intron_variant                                                |
| rs1292605611 | intron_variant,genic_upstream_transcript_variant                                                  |
| rs1292663972 | genic_downstream_transcript_variant,intron_variant                                                |
| rs1292666609 | intron_variant                                                                                    |
| rs1292726852 | intron_variant                                                                                    |
| rs1292757932 | intron_variant,genic_upstream_transcript_variant                                                  |
| rs1292761203 | intron_variant,genic_upstream_transcript_variant                                                  |
| rs1292790122 | intron_variant                                                                                    |
| rs1292808791 | genic_downstream_transcript_variant,intron_variant                                                |
| rs1292816383 | intron_variant,genic_upstream_transcript_variant                                                  |
| rs1292835360 | intron_variant,genic_upstream_transcript_variant                                                  |
| rs1292843318 | intron_variant                                                                                    |
| rs1292888872 | intron_variant                                                                                    |
| rs1292911013 | intron_variant                                                                                    |
| rs1292920682 | intron_variant,genic_upstream_transcript_variant                                                  |
| rs1292990794 | intron_variant,genic_upstream_transcript_variant                                                  |
| rs1293001086 | 2KB_upstream_variant,upstream_transcript_variant,intron_variant,genic_upstream_transcript_variant |
| rs1293111305 | intron_variant,genic_upstream_transcript_variant                                                  |
| rs1293115994 | intron_variant,genic_upstream_transcript_variant                                                  |
| rs1293167747 | intron_variant                                                                                    |
| rs1293175896 | intron_variant,genic_upstream_transcript_variant                                                  |
| rs1293182814 | intron_variant,genic_upstream_transcript_variant                                                  |
| rs1293201092 | intron_variant,genic_upstream_transcript_variant                                                  |
| rs1293229973 | intron_variant,genic_upstream_transcript_variant                                                  |
| rs1293254971 | intron_variant                                                                                    |
| rs1293297101 | intron_variant,genic_upstream_transcript_variant                                                  |
| rs1293302386 | intron_variant,genic_upstream_transcript_variant                                                  |
| rs1293314079 | intron_variant,genic_upstream_transcript_variant                                                  |

|              |                                                                                                                         |
|--------------|-------------------------------------------------------------------------------------------------------------------------|
| rs1293347552 | intron_variant                                                                                                          |
| rs1293352539 | intron_variant,genic_upstream_transcript_variant                                                                        |
| rs1293376532 | intron_variant,genic_upstream_transcript_variant                                                                        |
| rs1293393029 | intron_variant,genic_upstream_transcript_variant                                                                        |
| rs1293555456 | genic_downstream_transcript_variant,intron_variant                                                                      |
| rs1293558094 | intron_variant                                                                                                          |
| rs1293558177 | intron_variant                                                                                                          |
| rs1293570179 | intron_variant,genic_upstream_transcript_variant                                                                        |
| rs1293619689 | missense_variant,non_coding_transcript_variant,coding_sequence_variant                                                  |
| rs1293629156 | intron_variant                                                                                                          |
| rs1293662097 | intron_variant,genic_upstream_transcript_variant                                                                        |
| rs1293710243 | intron_variant,genic_upstream_transcript_variant                                                                        |
| rs1293724373 | intron_variant                                                                                                          |
| rs1293760543 | non_coding_transcript_variant,coding_sequence_variant,intron_variant,genic_upstream_transcript_variant,missense_variant |
| rs1293761372 | genic_downstream_transcript_variant,intron_variant                                                                      |
| rs1293766090 | intron_variant,genic_upstream_transcript_variant                                                                        |
| rs1293787714 | intron_variant                                                                                                          |
| rs1293796802 | intron_variant                                                                                                          |
| rs1293802982 | intron_variant                                                                                                          |
| rs1293825986 | intron_variant                                                                                                          |
| rs1293873029 | upstream_transcript_variant,intron_variant,genic_upstream_transcript_variant                                            |
| rs1293932716 | intron_variant                                                                                                          |
| rs1293961262 | intron_variant                                                                                                          |
| rs1293962930 | intron_variant,genic_upstream_transcript_variant                                                                        |
| rs1293964085 | genic_downstream_transcript_variant,3_prime_UTR_variant,non_coding_transcript_variant                                   |
| rs1293974802 | intron_variant                                                                                                          |
| rs1293981682 | intron_variant,genic_upstream_transcript_variant                                                                        |
| rs1294013018 | intron_variant                                                                                                          |
| rs1294015220 | intron_variant,genic_upstream_transcript_variant                                                                        |
| rs1294048353 | intron_variant                                                                                                          |
| rs1294057952 | intron_variant                                                                                                          |
| rs1294065862 | intron_variant                                                                                                          |
| rs1294067298 | intron_variant,genic_upstream_transcript_variant                                                                        |
| rs1294129869 | splice_donor_variant,intron_variant                                                                                     |
| rs1294137335 | intron_variant                                                                                                          |
| rs1294164501 | upstream_transcript_variant,intron_variant,genic_upstream_transcript_variant                                            |
| rs1294171619 | genic_downstream_transcript_variant,intron_variant                                                                      |
| rs1294180567 | intron_variant                                                                                                          |
| rs1294182538 | intron_variant,genic_upstream_transcript_variant                                                                        |
| rs1294251330 | intron_variant,genic_upstream_transcript_variant                                                                        |
| rs1294256173 | genic_downstream_transcript_variant,intron_variant                                                                      |
| rs1294296941 | intron_variant,genic_upstream_transcript_variant                                                                        |
| rs1294306253 | intron_variant,genic_upstream_transcript_variant                                                                        |
| rs1294343125 | intron_variant                                                                                                          |
| rs1294357532 | intron_variant,genic_upstream_transcript_variant                                                                        |
| rs1294358256 | genic_downstream_transcript_variant,intron_variant                                                                      |
| rs1294361435 | 2KB_upstream_variant,upstream_transcript_variant,intron_variant,genic_upstream_transcript_variant                       |
| rs1294408368 | genic_downstream_transcript_variant,intron_variant                                                                      |
| rs1294420483 | intron_variant,genic_upstream_transcript_variant                                                                        |
| rs1294429779 | missense_variant,non_coding_transcript_variant,coding_sequence_variant                                                  |
| rs1294436710 | intron_variant,genic_upstream_transcript_variant                                                                        |
| rs1294477697 | intron_variant,genic_upstream_transcript_variant                                                                        |
| rs1294521418 | intron_variant,genic_upstream_transcript_variant                                                                        |
| rs1294552230 | intron_variant,genic_upstream_transcript_variant                                                                        |
| rs1294553706 | genic_downstream_transcript_variant,intron_variant                                                                      |
| rs1294565381 | intron_variant                                                                                                          |
| rs1294565627 | genic_downstream_transcript_variant,intron_variant                                                                      |
| rs1294575200 | 2KB_upstream_variant,upstream_transcript_variant,intron_variant,genic_upstream_transcript_variant                       |
| rs1294577229 | intron_variant,genic_upstream_transcript_variant                                                                        |
| rs1294577809 | genic_downstream_transcript_variant,intron_variant                                                                      |
| rs1294632372 | intron_variant,genic_upstream_transcript_variant                                                                        |
| rs1294642856 | intron_variant,genic_upstream_transcript_variant                                                                        |
| rs1294643520 | 2KB_upstream_variant,upstream_transcript_variant,intron_variant,genic_upstream_transcript_variant                       |
| rs1294659481 | intron_variant,genic_upstream_transcript_variant                                                                        |
| rs1294667743 | intron_variant,genic_upstream_transcript_variant                                                                        |
| rs1294700303 | intron_variant,genic_upstream_transcript_variant                                                                        |
| rs1294717831 | genic_downstream_transcript_variant,intron_variant                                                                      |
| rs1294722137 | genic_downstream_transcript_variant,intron_variant                                                                      |
| rs1294769391 | non_coding_transcript_variant,coding_sequence_variant,intron_variant,genic_upstream_transcript_variant,missense_variant |
| rs1294783432 | intron_variant,genic_upstream_transcript_variant                                                                        |
| rs1294784258 | intron_variant                                                                                                          |
| rs1294797673 | intron_variant,genic_upstream_transcript_variant                                                                        |
| rs1294821030 | intron_variant,genic_upstream_transcript_variant                                                                        |
| rs1294853112 | intron_variant                                                                                                          |

|              |                                                                                                                         |
|--------------|-------------------------------------------------------------------------------------------------------------------------|
| rs1294924754 | non_coding_transcript_variant,coding_sequence_variant,intron_variant,genic_upstream_transcript_variant,missense_variant |
| rs1294932681 | genic_downstream_transcript_variant,intron_variant                                                                      |
| rs1295011733 | genic_downstream_transcript_variant,intron_variant                                                                      |
| rs1295055412 | intron_variant,genic_upstream_transcript_variant                                                                        |
| rs1295070149 | intron_variant                                                                                                          |
| rs1295075433 | intron_variant                                                                                                          |
| rs1295083446 | intron_variant,genic_upstream_transcript_variant                                                                        |
| rs1295105383 | intron_variant                                                                                                          |
| rs1295110452 | intron_variant,genic_upstream_transcript_variant                                                                        |
| rs1295127328 | intron_variant                                                                                                          |
| rs1295164696 | intron_variant                                                                                                          |
| rs1295166292 | intron_variant                                                                                                          |
| rs1295185291 | intron_variant,genic_upstream_transcript_variant                                                                        |
| rs1295219530 | intron_variant,genic_upstream_transcript_variant                                                                        |
| rs1295247757 | non_coding_transcript_variant,synonymous_variant,coding_sequence_variant                                                |
| rs1295253357 | intron_variant,genic_upstream_transcript_variant                                                                        |
| rs1295455580 | genic_downstream_transcript_variant,3_prime_UTR_variant,non_coding_transcript_variant                                   |
| rs1295548832 | intron_variant                                                                                                          |
| rs1295555188 | 2KB_upstream_variant,upstream_transcript_variant,intron_variant,genic_upstream_transcript_variant                       |
| rs1295577027 | genic_downstream_transcript_variant,intron_variant                                                                      |
| rs1295588443 | intron_variant,genic_upstream_transcript_variant                                                                        |
| rs1295642266 | intron_variant                                                                                                          |
| rs1295658411 | intron_variant,genic_upstream_transcript_variant                                                                        |
| rs1295665070 | intron_variant                                                                                                          |
| rs1295732671 | genic_downstream_transcript_variant,downstream_transcript_variant,intron_variant                                        |
| rs1295738778 | 2KB_upstream_variant,upstream_transcript_variant,intron_variant,genic_upstream_transcript_variant                       |
| rs1295748290 | intron_variant,genic_upstream_transcript_variant                                                                        |
| rs1295790703 | 5_prime_UTR_variant,intron_variant                                                                                      |
| rs1295905915 | intron_variant                                                                                                          |
| rs1295906264 | intron_variant                                                                                                          |
| rs1295936923 | intron_variant,genic_upstream_transcript_variant                                                                        |
| rs1295937311 | intron_variant                                                                                                          |
| rs1295946866 | intron_variant,genic_upstream_transcript_variant                                                                        |
| rs1295955085 | intron_variant                                                                                                          |
| rs1296028280 | intron_variant,genic_upstream_transcript_variant                                                                        |
| rs1296171493 | intron_variant                                                                                                          |
| rs1296186667 | intron_variant,genic_upstream_transcript_variant                                                                        |
| rs1296209507 | intron_variant,genic_upstream_transcript_variant                                                                        |
| rs1296237612 | genic_downstream_transcript_variant,intron_variant                                                                      |
| rs1296266788 | intron_variant                                                                                                          |
| rs1296280927 | intron_variant                                                                                                          |
| rs1296289277 | intron_variant,genic_upstream_transcript_variant                                                                        |
| rs1296318268 | genic_upstream_transcript_variant,intron_variant                                                                        |
| rs1296336828 | genic_upstream_transcript_variant,intron_variant                                                                        |
| rs1296397597 | intron_variant                                                                                                          |
| rs1296452113 | genic_upstream_transcript_variant,intron_variant                                                                        |
| rs1296452439 | genic_upstream_transcript_variant,intron_variant                                                                        |
| rs1296498488 | genic_upstream_transcript_variant,intron_variant,upstream_transcript_variant                                            |
| rs1296525889 | intron_variant,genic_downstream_transcript_variant                                                                      |
| rs1296543685 | genic_upstream_transcript_variant,intron_variant                                                                        |
| rs1296586686 | genic_upstream_transcript_variant,intron_variant                                                                        |
| rs1296592140 | intron_variant                                                                                                          |
| rs1296603624 | intron_variant                                                                                                          |
| rs1296634139 | intron_variant,genic_downstream_transcript_variant                                                                      |
| rs1296682431 | intron_variant,genic_downstream_transcript_variant                                                                      |
| rs1296707879 | intron_variant                                                                                                          |
| rs1296722918 | intron_variant                                                                                                          |
| rs1296809253 | genic_upstream_transcript_variant,intron_variant                                                                        |
| rs1296811173 | genic_upstream_transcript_variant,intron_variant                                                                        |
| rs1296820564 | genic_upstream_transcript_variant,intron_variant                                                                        |
| rs1296821487 | genic_upstream_transcript_variant,intron_variant                                                                        |
| rs1296882636 | intron_variant,genic_downstream_transcript_variant                                                                      |
| rs1296884412 | genic_upstream_transcript_variant,intron_variant                                                                        |
| rs1296893038 | intron_variant                                                                                                          |
| rs1296908519 | genic_upstream_transcript_variant,intron_variant                                                                        |
| rs1296920761 | genic_upstream_transcript_variant,intron_variant                                                                        |
| rs1296957946 | genic_upstream_transcript_variant,intron_variant,upstream_transcript_variant,2KB_upstream_variant                       |
| rs1296969482 | coding_sequence_variant,intron_variant,missense_variant                                                                 |
| rs1296978574 | genic_upstream_transcript_variant,intron_variant                                                                        |
| rs1296993780 | intron_variant                                                                                                          |
| rs1297029465 | genic_upstream_transcript_variant,intron_variant                                                                        |
| rs1297040241 | genic_upstream_transcript_variant,intron_variant                                                                        |
| rs1297049474 | 500B_downstream_variant,downstream_transcript_variant                                                                   |
| rs1297053108 | genic_upstream_transcript_variant,intron_variant                                                                        |

|              |                                                                                                            |
|--------------|------------------------------------------------------------------------------------------------------------|
| rs1297054056 | genic_upstream_transcript_variant,intron_variant                                                           |
| rs1297111310 | intron_variant                                                                                             |
| rs1297134988 | intron_variant,genic_downstream_transcript_variant                                                         |
| rs1297151502 | genic_upstream_transcript_variant,intron_variant                                                           |
| rs1297172129 | intron_variant                                                                                             |
| rs1297178607 | genic_upstream_transcript_variant,intron_variant,upstream_transcript_variant                               |
| rs1297187515 | intron_variant,genic_downstream_transcript_variant                                                         |
| rs1297237758 | genic_upstream_transcript_variant,intron_variant                                                           |
| rs1297284987 | genic_upstream_transcript_variant,intron_variant                                                           |
| rs1297289430 | genic_upstream_transcript_variant,intron_variant                                                           |
| rs1297363533 | intron_variant                                                                                             |
| rs1297421252 | intron_variant,genic_downstream_transcript_variant                                                         |
| rs1297424041 | genic_upstream_transcript_variant,intron_variant,upstream_transcript_variant,2KB_upstream_variant          |
| rs1297427786 | intron_variant                                                                                             |
| rs1297472107 | coding_sequence_variant,non_coding_transcript_variant,genic_downstream_transcript_variant,missense_variant |
| rs1297527450 | non_coding_transcript_variant,genic_downstream_transcript_variant,3_prime_UTR_variant                      |
| rs1297535819 | intron_variant,genic_downstream_transcript_variant                                                         |
| rs1297541506 | intron_variant                                                                                             |
| rs1297574817 | intron_variant                                                                                             |
| rs1297575857 | intron_variant                                                                                             |
| rs1297603367 | intron_variant,genic_downstream_transcript_variant                                                         |
| rs1297624711 | intron_variant                                                                                             |
| rs1297734010 | intron_variant                                                                                             |
| rs1297742097 | intron_variant                                                                                             |
| rs1297816187 | intron_variant                                                                                             |
| rs1297817088 | genic_upstream_transcript_variant,intron_variant                                                           |
| rs1297858282 | intron_variant,downstream_transcript_variant,genic_downstream_transcript_variant                           |
| rs1297909232 | genic_upstream_transcript_variant,intron_variant                                                           |
| rs1297910164 | genic_upstream_transcript_variant,intron_variant                                                           |
| rs1297937826 | intron_variant                                                                                             |
| rs1297976293 | genic_upstream_transcript_variant,intron_variant                                                           |
| rs1297979004 | intron_variant                                                                                             |
| rs1298035495 | genic_upstream_transcript_variant,intron_variant                                                           |
| rs1298052510 | intron_variant,genic_downstream_transcript_variant                                                         |
| rs1298053401 | intron_variant                                                                                             |
| rs1298055514 | intron_variant,genic_downstream_transcript_variant                                                         |
| rs1298089355 | intron_variant,genic_downstream_transcript_variant                                                         |
| rs1298091568 | genic_upstream_transcript_variant,intron_variant                                                           |
| rs1298092527 | intron_variant,genic_downstream_transcript_variant                                                         |
| rs1298094251 | intron_variant                                                                                             |
| rs1298095012 | intron_variant                                                                                             |
| rs1298096753 | genic_upstream_transcript_variant,intron_variant                                                           |
| rs1298112298 | intron_variant                                                                                             |
| rs1298146897 | genic_upstream_transcript_variant,intron_variant                                                           |
| rs1298174423 | intron_variant,genic_downstream_transcript_variant                                                         |
| rs1298188904 | intron_variant,genic_downstream_transcript_variant                                                         |
| rs1298193450 | intron_variant                                                                                             |
| rs1298243665 | genic_upstream_transcript_variant,intron_variant,upstream_transcript_variant,2KB_upstream_variant          |
| rs1298297408 | intron_variant                                                                                             |
| rs1298322992 | genic_upstream_transcript_variant,intron_variant                                                           |
| rs1298334169 | genic_upstream_transcript_variant,intron_variant                                                           |
| rs1298337884 | genic_upstream_transcript_variant,intron_variant,upstream_transcript_variant,2KB_upstream_variant          |
| rs1298476736 | intron_variant,genic_downstream_transcript_variant                                                         |
| rs1298495458 | genic_upstream_transcript_variant,intron_variant                                                           |
| rs1298508111 | genic_upstream_transcript_variant,intron_variant                                                           |
| rs1298526779 | genic_upstream_transcript_variant,intron_variant                                                           |
| rs1298590534 | non_coding_transcript_variant,genic_downstream_transcript_variant,3_prime_UTR_variant                      |
| rs1298591677 | genic_upstream_transcript_variant,intron_variant                                                           |
| rs1298611584 | genic_upstream_transcript_variant,intron_variant,upstream_transcript_variant                               |
| rs1298644628 | genic_upstream_transcript_variant,intron_variant                                                           |
| rs1298650856 | genic_upstream_transcript_variant,intron_variant                                                           |
| rs1298672205 | intron_variant,genic_downstream_transcript_variant                                                         |
| rs1298692173 | genic_upstream_transcript_variant,intron_variant                                                           |
| rs1298727386 | intron_variant                                                                                             |
| rs1298757306 | genic_upstream_transcript_variant,intron_variant                                                           |
| rs1298778672 | genic_upstream_transcript_variant,intron_variant,upstream_transcript_variant,2KB_upstream_variant          |
| rs1298815843 | genic_upstream_transcript_variant,intron_variant                                                           |
| rs1298884227 | intron_variant,genic_downstream_transcript_variant                                                         |
| rs1298918119 | intron_variant                                                                                             |
| rs1298921406 | intron_variant,genic_downstream_transcript_variant                                                         |
| rs1298941365 | genic_upstream_transcript_variant,intron_variant                                                           |
| rs1298950610 | non_coding_transcript_variant,genic_downstream_transcript_variant,3_prime_UTR_variant                      |
| rs1298963318 | genic_upstream_transcript_variant,intron_variant                                                           |
| rs1298998515 | intron_variant                                                                                             |

|              |                                                                                                                         |
|--------------|-------------------------------------------------------------------------------------------------------------------------|
| rs1298999049 | intron_variant                                                                                                          |
| rs1299041988 | intron_variant,genic_downstream_transcript_variant                                                                      |
| rs1299121703 | genic_upstream_transcript_variant,intron_variant                                                                        |
| rs1299130122 | coding_sequence_variant,non_coding_transcript_variant,missense_variant                                                  |
| rs1299157175 | intron_variant                                                                                                          |
| rs1299175587 | intron_variant                                                                                                          |
| rs1299199370 | intron_variant                                                                                                          |
| rs1299231404 | genic_upstream_transcript_variant,intron_variant                                                                        |
| rs1299248664 | intron_variant                                                                                                          |
| rs1299259688 | genic_upstream_transcript_variant,intron_variant                                                                        |
| rs1299260910 | genic_upstream_transcript_variant,intron_variant                                                                        |
| rs1299264174 | intron_variant                                                                                                          |
| rs1299278209 | genic_upstream_transcript_variant,intron_variant                                                                        |
| rs1299287391 | intron_variant                                                                                                          |
| rs1299336980 | intron_variant                                                                                                          |
| rs1299352528 | intron_variant                                                                                                          |
| rs1299352731 | genic_upstream_transcript_variant,intron_variant                                                                        |
| rs1299364568 | genic_upstream_transcript_variant,intron_variant,upstream_transcript_variant                                            |
| rs1299446291 | genic_upstream_transcript_variant,intron_variant                                                                        |
| rs1299454234 | genic_upstream_transcript_variant,intron_variant                                                                        |
| rs1299468610 | intron_variant                                                                                                          |
| rs1299503920 | genic_upstream_transcript_variant,intron_variant                                                                        |
| rs1299568369 | intron_variant,genic_downstream_transcript_variant                                                                      |
| rs1299597332 | 500B_downstream_variant,downstream_transcript_variant                                                                   |
| rs1299627198 | intron_variant                                                                                                          |
| rs1299730672 | genic_upstream_transcript_variant,intron_variant                                                                        |
| rs1299734798 | genic_upstream_transcript_variant,intron_variant                                                                        |
| rs1299745767 | intron_variant                                                                                                          |
| rs1299784649 | intron_variant                                                                                                          |
| rs1299865692 | intron_variant                                                                                                          |
| rs1299900374 | intron_variant                                                                                                          |
| rs1299926681 | intron_variant                                                                                                          |
| rs1299952832 | intron_variant                                                                                                          |
| rs1299974297 | genic_upstream_transcript_variant,intron_variant                                                                        |
| rs1300019852 | intron_variant                                                                                                          |
| rs1300119557 | genic_upstream_transcript_variant,intron_variant                                                                        |
| rs1300129575 | genic_upstream_transcript_variant,intron_variant                                                                        |
| rs1300134171 | intron_variant                                                                                                          |
| rs1300168011 | intron_variant                                                                                                          |
| rs1300169869 | genic_upstream_transcript_variant,intron_variant,upstream_transcript_variant,2KB_upstream_variant                       |
| rs1300169905 | genic_upstream_transcript_variant,intron_variant,upstream_transcript_variant,2KB_upstream_variant                       |
| rs1300172131 | genic_upstream_transcript_variant,intron_variant                                                                        |
| rs1300181890 | genic_upstream_transcript_variant,intron_variant                                                                        |
| rs1300213412 | genic_upstream_transcript_variant,intron_variant                                                                        |
| rs1300235374 | genic_upstream_transcript_variant,intron_variant                                                                        |
| rs1300239116 | genic_upstream_transcript_variant,intron_variant                                                                        |
| rs1300264803 | intron_variant,genic_downstream_transcript_variant                                                                      |
| rs1300275398 | genic_upstream_transcript_variant,intron_variant,upstream_transcript_variant,2KB_upstream_variant                       |
| rs1300316498 | intron_variant                                                                                                          |
| rs1300328824 | intron_variant                                                                                                          |
| rs1300371827 | genic_upstream_transcript_variant,intron_variant                                                                        |
| rs1300390885 | intron_variant                                                                                                          |
| rs1300411958 | genic_upstream_transcript_variant,intron_variant                                                                        |
| rs1300431535 | intron_variant,genic_downstream_transcript_variant                                                                      |
| rs1300449590 | intron_variant                                                                                                          |
| rs1300468749 | intron_variant,genic_downstream_transcript_variant                                                                      |
| rs1300476012 | genic_upstream_transcript_variant,intron_variant                                                                        |
| rs1300538176 | intron_variant                                                                                                          |
| rs1300547026 | genic_upstream_transcript_variant,intron_variant,upstream_transcript_variant                                            |
| rs1300630793 | genic_upstream_transcript_variant,intron_variant,upstream_transcript_variant,2KB_upstream_variant                       |
| rs1300665336 | intron_variant                                                                                                          |
| rs1300671802 | intron_variant                                                                                                          |
| rs1300689038 | genic_upstream_transcript_variant,intron_variant                                                                        |
| rs1300705414 | intron_variant                                                                                                          |
| rs1300749335 | intron_variant,genic_downstream_transcript_variant                                                                      |
| rs1300783422 | genic_upstream_transcript_variant,intron_variant                                                                        |
| rs1300795206 | intron_variant                                                                                                          |
| rs1300799286 | intron_variant                                                                                                          |
| rs1300864006 | genic_upstream_transcript_variant,intron_variant                                                                        |
| rs1300895037 | genic_upstream_transcript_variant,intron_variant                                                                        |
| rs1300912120 | genic_upstream_transcript_variant,intron_variant                                                                        |
| rs1300951436 | intron_variant                                                                                                          |
| rs1300961648 | coding_sequence_variant,intron_variant,missense_variant,genic_upstream_transcript_variant,non_coding_transcript_variant |
| rs1301004112 | genic_upstream_transcript_variant,intron_variant                                                                        |

|              |                                                                                                   |
|--------------|---------------------------------------------------------------------------------------------------|
| rs1301005022 | genic_upstream_transcript_variant,intron_variant                                                  |
| rs1301025144 | genic_upstream_transcript_variant,intron_variant                                                  |
| rs1301028854 | intron_variant                                                                                    |
| rs1301078079 | genic_upstream_transcript_variant,intron_variant,upstream_transcript_variant,2KB_upstream_variant |
| rs1301098090 | intron_variant                                                                                    |
| rs1301135165 | intron_variant,genic_downstream_transcript_variant                                                |
| rs1301135389 | intron_variant                                                                                    |
| rs1301160434 | intron_variant,genic_downstream_transcript_variant                                                |
| rs1301188696 | genic_upstream_transcript_variant,intron_variant,upstream_transcript_variant,2KB_upstream_variant |
| rs1301250920 | intron_variant,genic_downstream_transcript_variant                                                |
| rs1301278281 | intron_variant                                                                                    |
| rs1301299167 | intron_variant                                                                                    |
| rs1301312767 | intron_variant                                                                                    |
| rs1301375929 | intron_variant,genic_downstream_transcript_variant                                                |
| rs1301381855 | intron_variant                                                                                    |
| rs1301400156 | genic_upstream_transcript_variant,intron_variant,upstream_transcript_variant,2KB_upstream_variant |
| rs1301439144 | genic_upstream_transcript_variant,intron_variant,upstream_transcript_variant                      |
| rs1301476969 | intron_variant                                                                                    |
| rs1301491730 | genic_upstream_transcript_variant,intron_variant,upstream_transcript_variant                      |
| rs1301503021 | non_coding_transcript_variant,genic_downstream_transcript_variant,3_prime_UTR_variant             |
| rs1301537010 | genic_upstream_transcript_variant,intron_variant                                                  |
| rs1301567749 | intron_variant                                                                                    |
| rs1301609205 | genic_upstream_transcript_variant,intron_variant                                                  |
| rs1301648576 | intron_variant                                                                                    |
| rs1301654793 | genic_upstream_transcript_variant,intron_variant                                                  |
| rs1301682613 | genic_upstream_transcript_variant,intron_variant                                                  |
| rs1301726121 | genic_upstream_transcript_variant,intron_variant                                                  |
| rs1301733471 | genic_upstream_transcript_variant,intron_variant                                                  |
| rs1301750241 | coding_sequence_variant,non_coding_transcript_variant,missense_variant                            |
| rs1301774834 | intron_variant                                                                                    |
| rs1301775134 | intron_variant                                                                                    |
| rs1301784900 | genic_upstream_transcript_variant,intron_variant                                                  |
| rs1301785827 | intron_variant,genic_downstream_transcript_variant                                                |
| rs1301787596 | intron_variant                                                                                    |
| rs1301801700 | intron_variant                                                                                    |
| rs1301871408 | genic_upstream_transcript_variant,intron_variant                                                  |
| rs1301872536 | genic_upstream_transcript_variant,intron_variant                                                  |
| rs1301883404 | intron_variant,genic_downstream_transcript_variant                                                |
| rs1301887137 | intron_variant                                                                                    |
| rs1301919237 | intron_variant                                                                                    |
| rs1301986324 | genic_upstream_transcript_variant,intron_variant                                                  |
| rs1302014964 | genic_upstream_transcript_variant,intron_variant                                                  |
| rs1302028245 | intron_variant                                                                                    |
| rs1302033618 | intron_variant                                                                                    |
| rs1302038623 | intron_variant                                                                                    |
| rs1302052221 | intron_variant                                                                                    |
| rs1302076455 | intron_variant                                                                                    |
| rs1302084910 | genic_upstream_transcript_variant,intron_variant                                                  |
| rs1302088477 | intron_variant                                                                                    |
| rs1302088589 | genic_upstream_transcript_variant,intron_variant,upstream_transcript_variant,2KB_upstream_variant |
| rs1302090619 | intron_variant,genic_downstream_transcript_variant                                                |
| rs1302133512 | genic_upstream_transcript_variant,intron_variant                                                  |
| rs1302143378 | genic_upstream_transcript_variant,intron_variant                                                  |
| rs1302148918 | genic_upstream_transcript_variant,intron_variant                                                  |
| rs1302153704 | intron_variant,genic_downstream_transcript_variant                                                |
| rs1302192513 | intron_variant,genic_downstream_transcript_variant                                                |
| rs1302249211 | intron_variant                                                                                    |
| rs1302260541 | genic_upstream_transcript_variant,intron_variant                                                  |
| rs1302260616 | genic_upstream_transcript_variant,intron_variant                                                  |
| rs1302329593 | intron_variant                                                                                    |
| rs1302368858 | genic_upstream_transcript_variant,intron_variant                                                  |
| rs1302371805 | intron_variant                                                                                    |
| rs1302379818 | intron_variant,genic_downstream_transcript_variant                                                |
| rs1302398779 | genic_upstream_transcript_variant,intron_variant,upstream_transcript_variant                      |
| rs1302427603 | genic_upstream_transcript_variant,intron_variant                                                  |
| rs1302438869 | intron_variant                                                                                    |
| rs1302499371 | intron_variant,genic_downstream_transcript_variant                                                |
| rs1302507340 | intron_variant                                                                                    |
| rs1302512681 | intron_variant                                                                                    |
| rs1302513833 | genic_upstream_transcript_variant,intron_variant                                                  |
| rs1302558720 | genic_upstream_transcript_variant,intron_variant,upstream_transcript_variant,2KB_upstream_variant |
| rs1302587458 | genic_upstream_transcript_variant,intron_variant                                                  |
| rs1302594027 | genic_upstream_transcript_variant,intron_variant,upstream_transcript_variant,2KB_upstream_variant |
| rs1302713204 | non_coding_transcript_variant,genic_downstream_transcript_variant,3_prime_UTR_variant             |

|              |                                                                                                                               |
|--------------|-------------------------------------------------------------------------------------------------------------------------------|
| rs1302743882 | genic_upstream_transcript_variant,intron_variant,upstream_transcript_variant                                                  |
| rs1302746288 | genic_upstream_transcript_variant,intron_variant                                                                              |
| rs1302768282 | intron_variant,genic_downstream_transcript_variant                                                                            |
| rs1302786361 | genic_upstream_transcript_variant,intron_variant                                                                              |
| rs1302798523 | genic_upstream_transcript_variant,intron_variant                                                                              |
| rs1302838145 | genic_upstream_transcript_variant,intron_variant                                                                              |
| rs1302913460 | genic_upstream_transcript_variant,intron_variant                                                                              |
| rs1302914221 | intron_variant                                                                                                                |
| rs1302943389 | intron_variant                                                                                                                |
| rs1302982272 | genic_upstream_transcript_variant,intron_variant                                                                              |
| rs1303026120 | intron_variant                                                                                                                |
| rs1303042681 | genic_upstream_transcript_variant,intron_variant                                                                              |
| rs1303051316 | intron_variant                                                                                                                |
| rs1303054061 | genic_upstream_transcript_variant,intron_variant                                                                              |
| rs1303063845 | genic_upstream_transcript_variant,intron_variant                                                                              |
| rs1303163189 | intron_variant                                                                                                                |
| rs1303177815 | genic_upstream_transcript_variant,intron_variant                                                                              |
| rs1303181366 | intron_variant,genic_downstream_transcript_variant                                                                            |
| rs1303201906 | intron_variant                                                                                                                |
| rs1303212008 | genic_upstream_transcript_variant,intron_variant                                                                              |
| rs1303216504 | genic_upstream_transcript_variant,intron_variant                                                                              |
| rs1303255651 | intron_variant                                                                                                                |
| rs1303257051 | intron_variant,genic_downstream_transcript_variant                                                                            |
| rs1303287027 | intron_variant                                                                                                                |
| rs1303332788 | intron_variant                                                                                                                |
| rs1303347578 | genic_upstream_transcript_variant,intron_variant                                                                              |
| rs1303357710 | intron_variant                                                                                                                |
| rs1303395409 | intron_variant                                                                                                                |
| rs1303404657 | intron_variant,genic_downstream_transcript_variant                                                                            |
| rs1303496010 | intron_variant                                                                                                                |
| rs1303514988 | genic_upstream_transcript_variant,intron_variant                                                                              |
| rs1303531946 | genic_upstream_transcript_variant,intron_variant                                                                              |
| rs1303554896 | intron_variant                                                                                                                |
| rs1303568851 | genic_upstream_transcript_variant,intron_variant                                                                              |
| rs1303621696 | genic_upstream_transcript_variant,intron_variant,upstream_transcript_variant,2KB_upstream_variant                             |
| rs1303704009 | genic_upstream_transcript_variant,intron_variant                                                                              |
| rs1303708620 | genic_upstream_transcript_variant,intron_variant                                                                              |
| rs1303752575 | intron_variant                                                                                                                |
| rs1303755887 | genic_upstream_transcript_variant,intron_variant                                                                              |
| rs1303869254 | intron_variant                                                                                                                |
| rs1303881810 | genic_upstream_transcript_variant,intron_variant,upstream_transcript_variant,2KB_upstream_variant                             |
| rs1303903534 | non_coding_transcript_variant,genic_downstream_transcript_variant,3_prime_UTR_variant                                         |
| rs1303933628 | intron_variant,genic_downstream_transcript_variant                                                                            |
| rs1303960816 | intron_variant                                                                                                                |
| rs1303977348 | intron_variant                                                                                                                |
| rs1303985986 | intron_variant,genic_downstream_transcript_variant                                                                            |
| rs1304094423 | intron_variant,genic_downstream_transcript_variant                                                                            |
| rs1304162063 | intron_variant                                                                                                                |
| rs1304166225 | genic_upstream_transcript_variant,intron_variant,upstream_transcript_variant,2KB_upstream_variant                             |
| rs1304207319 | genic_upstream_transcript_variant,intron_variant                                                                              |
| rs1304217978 | genic_upstream_transcript_variant,intron_variant                                                                              |
| rs1304235575 | intron_variant                                                                                                                |
| rs1304260049 | genic_upstream_transcript_variant,intron_variant,upstream_transcript_variant,2KB_upstream_variant                             |
| rs1304271896 | intron_variant,genic_downstream_transcript_variant                                                                            |
| rs1304317163 | genic_upstream_transcript_variant,intron_variant                                                                              |
| rs1304331130 | intron_variant                                                                                                                |
| rs1304382571 | intron_variant                                                                                                                |
| rs1304433160 | intron_variant                                                                                                                |
| rs1304460497 | coding_sequence_variant,non_coding_transcript_variant,missense_variant                                                        |
| rs1304475236 | intron_variant                                                                                                                |
| rs1304595463 | genic_upstream_transcript_variant,intron_variant                                                                              |
| rs1304601935 | intron_variant                                                                                                                |
| rs1304603842 | genic_upstream_transcript_variant,intron_variant                                                                              |
| rs1304607970 | intron_variant,genic_downstream_transcript_variant                                                                            |
| rs1304662662 | genic_upstream_transcript_variant,intron_variant                                                                              |
| rs1304672600 | genic_upstream_transcript_variant,intron_variant                                                                              |
| rs1304696380 | intron_variant,genic_downstream_transcript_variant                                                                            |
| rs1304741783 | intron_variant                                                                                                                |
| rs1304762731 | genic_upstream_transcript_variant,intron_variant                                                                              |
| rs1304765887 | coding_sequence_variant,genic_downstream_transcript_variant,missense_variant,synonymous_variant,non_coding_transcript_variant |
| rs1304765992 | genic_upstream_transcript_variant,intron_variant                                                                              |
| rs1304818904 | intron_variant,genic_downstream_transcript_variant                                                                            |
| rs1304820471 | genic_upstream_transcript_variant,intron_variant                                                                              |
| rs1304837412 | intron_variant                                                                                                                |

|              |                                                                                                                                            |
|--------------|--------------------------------------------------------------------------------------------------------------------------------------------|
| rs1304854937 | genic_upstream_transcript_variant,intron_variant                                                                                           |
| rs1304940256 | genic_upstream_transcript_variant,intron_variant                                                                                           |
| rs1304943665 | intron_variant,genic_downstream_transcript_variant                                                                                         |
| rs1304951695 | genic_upstream_transcript_variant,intron_variant,upstream_transcript_variant,2KB_upstream_variant                                          |
| rs1304993591 | intron_variant                                                                                                                             |
| rs1305071497 | intron_variant                                                                                                                             |
| rs1305088304 | intron_variant                                                                                                                             |
| rs1305168527 | genic_upstream_transcript_variant,intron_variant                                                                                           |
| rs1305174716 | coding_sequence_variant,intron_variant,missense_variant,synonymous_variant,genic_upstream_transcript_variant,non_coding_transcript_variant |
| rs1305212965 | genic_upstream_transcript_variant,intron_variant                                                                                           |
| rs1305253671 | genic_upstream_transcript_variant,intron_variant                                                                                           |
| rs1305282357 | genic_upstream_transcript_variant,intron_variant                                                                                           |
| rs1305286405 | genic_upstream_transcript_variant,intron_variant                                                                                           |
| rs1305329009 | intron_variant                                                                                                                             |
| rs1305339099 | intron_variant                                                                                                                             |
| rs1305369264 | genic_upstream_transcript_variant,intron_variant                                                                                           |
| rs1305383482 | intron_variant                                                                                                                             |
| rs1305397162 | intron_variant                                                                                                                             |
| rs1305411309 | genic_upstream_transcript_variant,intron_variant                                                                                           |
| rs1305437290 | genic_upstream_transcript_variant,intron_variant                                                                                           |
| rs1305448757 | intron_variant                                                                                                                             |
| rs1305467807 | genic_upstream_transcript_variant,intron_variant                                                                                           |
| rs1305528287 | genic_upstream_transcript_variant,intron_variant                                                                                           |
| rs1305535640 | intron_variant                                                                                                                             |
| rs1305553070 | intron_variant                                                                                                                             |
| rs1305582926 | intron_variant                                                                                                                             |
| rs1305594217 | genic_upstream_transcript_variant,intron_variant                                                                                           |
| rs1305628153 | genic_upstream_transcript_variant,intron_variant                                                                                           |
| rs1305691952 | intron_variant                                                                                                                             |
| rs1305708815 | intron_variant                                                                                                                             |
| rs1305709349 | genic_upstream_transcript_variant,intron_variant                                                                                           |
| rs1305710880 | intron_variant                                                                                                                             |
| rs1305714796 | genic_upstream_transcript_variant,intron_variant                                                                                           |
| rs1305750674 | genic_upstream_transcript_variant,intron_variant                                                                                           |
| rs1305757836 | intron_variant,genic_downstream_transcript_variant                                                                                         |
| rs1305764767 | intron_variant                                                                                                                             |
| rs1305767571 | intron_variant                                                                                                                             |
| rs1305791402 | intron_variant                                                                                                                             |
| rs1305794529 | genic_upstream_transcript_variant,intron_variant                                                                                           |
| rs1305836795 | intron_variant                                                                                                                             |
| rs1305852593 | genic_upstream_transcript_variant,intron_variant                                                                                           |
| rs1305855213 | genic_upstream_transcript_variant,intron_variant,upstream_transcript_variant                                                               |
| rs1305943122 | intron_variant                                                                                                                             |
| rs1305958071 | intron_variant                                                                                                                             |
| rs1305966614 | genic_upstream_transcript_variant,intron_variant                                                                                           |
| rs1305999315 | intron_variant                                                                                                                             |
| rs1306050081 | intron_variant                                                                                                                             |
| rs1306054463 | non_coding_transcript_variant,genic_downstream_transcript_variant,3_prime_UTR_variant                                                      |
| rs1306081840 | coding_sequence_variant,non_coding_transcript_variant,missense_variant                                                                     |
| rs1306125971 | intron_variant                                                                                                                             |
| rs1306187277 | intron_variant,genic_downstream_transcript_variant                                                                                         |
| rs1306197496 | intron_variant                                                                                                                             |
| rs1306257882 | genic_upstream_transcript_variant,intron_variant,upstream_transcript_variant,2KB_upstream_variant                                          |
| rs1306317694 | genic_upstream_transcript_variant,intron_variant                                                                                           |
| rs1306385360 | intron_variant                                                                                                                             |
| rs1306430151 | intron_variant                                                                                                                             |
| rs1306435940 | intron_variant,genic_downstream_transcript_variant                                                                                         |
| rs1306455130 | genic_upstream_transcript_variant,intron_variant                                                                                           |
| rs1306457178 | genic_upstream_transcript_variant,intron_variant,upstream_transcript_variant,2KB_upstream_variant                                          |
| rs1306503770 | genic_upstream_transcript_variant,intron_variant                                                                                           |
| rs1306513029 | intron_variant                                                                                                                             |
| rs1306539083 | intron_variant,genic_downstream_transcript_variant                                                                                         |
| rs1306554431 | intron_variant                                                                                                                             |
| rs1306596278 | intron_variant                                                                                                                             |
| rs1306648033 | genic_upstream_transcript_variant,intron_variant                                                                                           |
| rs1306702084 | intron_variant                                                                                                                             |
| rs1306743022 | non_coding_transcript_variant,genic_downstream_transcript_variant,3_prime_UTR_variant                                                      |
| rs1306790234 | intron_variant,genic_downstream_transcript_variant                                                                                         |
| rs1306834857 | intron_variant                                                                                                                             |
| rs1306867252 | intron_variant                                                                                                                             |
| rs1306895692 | genic_upstream_transcript_variant,intron_variant                                                                                           |
| rs1306906825 | genic_upstream_transcript_variant,intron_variant                                                                                           |
| rs1306934322 | intron_variant                                                                                                                             |
| rs1306976105 | intron_variant                                                                                                                             |

|              |                                                                                                   |
|--------------|---------------------------------------------------------------------------------------------------|
| rs1307003274 | genic_upstream_transcript_variant,intron_variant                                                  |
| rs1307026003 | genic_upstream_transcript_variant,intron_variant,upstream_transcript_variant                      |
| rs1307037078 | genic_upstream_transcript_variant,intron_variant                                                  |
| rs1307040952 | 500B_downstream_variant,downstream_transcript_variant                                             |
| rs1307042860 | genic_upstream_transcript_variant,intron_variant                                                  |
| rs1307047293 | intron_variant                                                                                    |
| rs1307076159 | genic_upstream_transcript_variant,intron_variant                                                  |
| rs1307081926 | intron_variant                                                                                    |
| rs1307094547 | intron_variant,genic_downstream_transcript_variant                                                |
| rs1307112964 | genic_upstream_transcript_variant,intron_variant                                                  |
| rs1307141797 | genic_upstream_transcript_variant,intron_variant                                                  |
| rs1307144196 | genic_upstream_transcript_variant,intron_variant                                                  |
| rs1307177608 | intron_variant                                                                                    |
| rs1307235391 | intron_variant                                                                                    |
| rs1307248519 | genic_upstream_transcript_variant,intron_variant                                                  |
| rs1307253611 | genic_upstream_transcript_variant,intron_variant                                                  |
| rs1307260687 | genic_upstream_transcript_variant,intron_variant,upstream_transcript_variant,2KB_upstream_variant |
| rs1307264647 | genic_upstream_transcript_variant,intron_variant,upstream_transcript_variant                      |
| rs1307376941 | intron_variant                                                                                    |
| rs1307414526 | genic_upstream_transcript_variant,intron_variant                                                  |
| rs1307418443 | intron_variant,genic_downstream_transcript_variant                                                |
| rs1307465012 | intron_variant                                                                                    |
| rs1307492478 | genic_upstream_transcript_variant,intron_variant,upstream_transcript_variant,2KB_upstream_variant |
| rs1307494294 | genic_upstream_transcript_variant,intron_variant                                                  |
| rs1307542495 | genic_upstream_transcript_variant,intron_variant                                                  |
| rs1307547811 | genic_upstream_transcript_variant,intron_variant                                                  |
| rs1307584609 | coding_sequence_variant,non_coding_transcript_variant,missense_variant                            |
| rs1307625015 | genic_upstream_transcript_variant,intron_variant                                                  |
| rs1307690544 | intron_variant                                                                                    |
| rs1307753319 | genic_upstream_transcript_variant,intron_variant                                                  |
| rs1307755063 | genic_upstream_transcript_variant,intron_variant                                                  |
| rs1307757992 | intron_variant                                                                                    |
| rs1307806710 | intron_variant                                                                                    |
| rs1307819444 | intron_variant                                                                                    |
| rs1307824723 | intron_variant                                                                                    |
| rs1307859660 | genic_upstream_transcript_variant,intron_variant                                                  |
| rs1307883185 | intron_variant                                                                                    |
| rs1307909222 | intron_variant                                                                                    |
| rs1307937187 | genic_upstream_transcript_variant,intron_variant                                                  |
| rs1307976629 | intron_variant                                                                                    |
| rs1308048296 | intron_variant                                                                                    |
| rs1308048791 | genic_upstream_transcript_variant,intron_variant                                                  |
| rs1308060081 | genic_upstream_transcript_variant,intron_variant                                                  |
| rs1308104382 | intron_variant,genic_downstream_transcript_variant                                                |
| rs1308111433 | intron_variant                                                                                    |
| rs1308148206 | intron_variant                                                                                    |
| rs1308154994 | genic_upstream_transcript_variant,intron_variant                                                  |
| rs1308162642 | non_coding_transcript_variant,genic_downstream_transcript_variant,3_prime_UTR_variant             |
| rs1308210171 | intron_variant,genic_downstream_transcript_variant                                                |
| rs1308227428 | genic_upstream_transcript_variant,intron_variant,upstream_transcript_variant                      |
| rs1308281877 | genic_upstream_transcript_variant,intron_variant                                                  |
| rs1308293195 | genic_upstream_transcript_variant,intron_variant                                                  |
| rs1308331627 | intron_variant                                                                                    |
| rs1308335923 | genic_upstream_transcript_variant,intron_variant                                                  |
| rs1308356152 | genic_upstream_transcript_variant,intron_variant                                                  |
| rs1308374006 | intron_variant,genic_downstream_transcript_variant                                                |
| rs1308414121 | coding_sequence_variant,non_coding_transcript_variant,inframe_indel,stop_gained                   |
| rs1308423158 | genic_upstream_transcript_variant,intron_variant                                                  |
| rs1308429703 | intron_variant,genic_downstream_transcript_variant                                                |
| rs1308457568 | intron_variant                                                                                    |
| rs1308494335 | intron_variant,5_prime_UTR_variant                                                                |
| rs1308499090 | genic_upstream_transcript_variant,intron_variant                                                  |
| rs1308532501 | intron_variant                                                                                    |
| rs1308549163 | intron_variant,genic_downstream_transcript_variant                                                |
| rs1308563209 | genic_upstream_transcript_variant,intron_variant,upstream_transcript_variant                      |
| rs1308584251 | intron_variant                                                                                    |
| rs1308600899 | intron_variant,genic_downstream_transcript_variant                                                |
| rs1308626323 | genic_upstream_transcript_variant,intron_variant,upstream_transcript_variant,5_prime_UTR_variant  |
| rs1308637291 | genic_upstream_transcript_variant,intron_variant                                                  |
| rs1308660021 | intron_variant                                                                                    |
| rs1308720709 | genic_upstream_transcript_variant,intron_variant                                                  |
| rs1308726301 | intron_variant                                                                                    |
| rs1308749435 | genic_upstream_transcript_variant,intron_variant                                                  |
| rs1308773055 | genic_upstream_transcript_variant,intron_variant,upstream_transcript_variant,2KB_upstream_variant |

|              |                                                                                                                         |
|--------------|-------------------------------------------------------------------------------------------------------------------------|
| rs1308826106 | genic_upstream_transcript_variant,intron_variant                                                                        |
| rs1308844944 | genic_upstream_transcript_variant,intron_variant                                                                        |
| rs1308849438 | genic_upstream_transcript_variant,intron_variant                                                                        |
| rs1308865312 | intron_variant,genic_upstream_transcript_variant                                                                        |
| rs1308911093 | intron_variant,genic_upstream_transcript_variant                                                                        |
| rs1308931094 | intron_variant,genic_upstream_transcript_variant                                                                        |
| rs1309051082 | intron_variant                                                                                                          |
| rs1309099009 | intron_variant                                                                                                          |
| rs1309145893 | intron_variant,genic_upstream_transcript_variant                                                                        |
| rs1309165130 | intron_variant,non_coding_transcript_variant,genic_upstream_transcript_variant,5_prime_UTR_variant                      |
| rs1309183570 | intron_variant,genic_upstream_transcript_variant                                                                        |
| rs1309236031 | non_coding_transcript_variant,intron_variant,genic_upstream_transcript_variant,coding_sequence_variant,missense_variant |
| rs1309292692 | intron_variant,genic_upstream_transcript_variant                                                                        |
| rs1309304637 | intron_variant,genic_upstream_transcript_variant                                                                        |
| rs1309343067 | intron_variant                                                                                                          |
| rs1309379022 | intron_variant,genic_upstream_transcript_variant                                                                        |
| rs1309380958 | intron_variant,genic_upstream_transcript_variant                                                                        |
| rs1309429273 | intron_variant,genic_downstream_transcript_variant                                                                      |
| rs1309447259 | intron_variant,upstream_transcript_variant,genic_upstream_transcript_variant                                            |
| rs1309479864 | intron_variant                                                                                                          |
| rs1309496490 | intron_variant,genic_downstream_transcript_variant                                                                      |
| rs1309565491 | intron_variant,genic_downstream_transcript_variant                                                                      |
| rs1309611040 | intron_variant,genic_upstream_transcript_variant                                                                        |
| rs1309616793 | intron_variant,genic_downstream_transcript_variant                                                                      |
| rs1309638201 | non_coding_transcript_variant,synonymous_variant,genic_downstream_transcript_variant,coding_sequence_variant            |
| rs1309650693 | intron_variant,genic_upstream_transcript_variant                                                                        |
| rs1309656283 | intron_variant                                                                                                          |
| rs1309668249 | intron_variant,genic_upstream_transcript_variant                                                                        |
| rs1309668523 | intron_variant                                                                                                          |
| rs1309693976 | intron_variant,upstream_transcript_variant,genic_upstream_transcript_variant                                            |
| rs1309713208 | intron_variant                                                                                                          |
| rs1309716165 | intron_variant,genic_upstream_transcript_variant                                                                        |
| rs1309737976 | non_coding_transcript_variant,3_prime_UTR_variant,genic_downstream_transcript_variant                                   |
| rs1309746473 | intron_variant,genic_upstream_transcript_variant                                                                        |
| rs1309754764 | intron_variant                                                                                                          |
| rs1309768143 | intron_variant                                                                                                          |
| rs1309786469 | intron_variant,genic_upstream_transcript_variant                                                                        |
| rs1309786924 | intron_variant                                                                                                          |
| rs1309836638 | intron_variant,genic_downstream_transcript_variant                                                                      |
| rs1309863765 | intron_variant                                                                                                          |
| rs1309886126 | intron_variant,genic_downstream_transcript_variant                                                                      |
| rs1309922132 | intron_variant                                                                                                          |
| rs1309976931 | intron_variant,genic_upstream_transcript_variant                                                                        |
| rs1309999371 | intron_variant,2KB_upstream_variant,upstream_transcript_variant,genic_upstream_transcript_variant                       |
| rs1310082688 | intron_variant,upstream_transcript_variant,genic_upstream_transcript_variant                                            |
| rs1310102033 | intron_variant,genic_upstream_transcript_variant                                                                        |
| rs1310132990 | intron_variant,genic_upstream_transcript_variant                                                                        |
| rs1310173093 | intron_variant,genic_upstream_transcript_variant                                                                        |
| rs1310174152 | intron_variant,upstream_transcript_variant,genic_upstream_transcript_variant                                            |
| rs1310174699 | intron_variant,genic_upstream_transcript_variant                                                                        |
| rs1310190422 | intron_variant,genic_downstream_transcript_variant                                                                      |
| rs1310197846 | intron_variant,genic_upstream_transcript_variant                                                                        |
| rs1310198865 | intron_variant,genic_upstream_transcript_variant                                                                        |
| rs1310238376 | intron_variant                                                                                                          |
| rs1310260084 | intron_variant,genic_upstream_transcript_variant                                                                        |
| rs1310261782 | 500B_downstream_variant,downstream_transcript_variant                                                                   |
| rs1310273754 | intron_variant                                                                                                          |
| rs1310321706 | intron_variant,genic_upstream_transcript_variant                                                                        |
| rs1310363757 | intron_variant,genic_downstream_transcript_variant                                                                      |
| rs1310372387 | intron_variant,genic_downstream_transcript_variant                                                                      |
| rs1310385514 | intron_variant                                                                                                          |
| rs1310393391 | intron_variant                                                                                                          |
| rs1310409843 | intron_variant,genic_upstream_transcript_variant                                                                        |
| rs1310473164 | intron_variant                                                                                                          |
| rs1310487412 | intron_variant                                                                                                          |
| rs1310503223 | intron_variant,genic_upstream_transcript_variant                                                                        |
| rs1310591058 | intron_variant                                                                                                          |
| rs1310598349 | intron_variant,genic_upstream_transcript_variant                                                                        |
| rs1310613010 | non_coding_transcript_variant,3_prime_UTR_variant,genic_downstream_transcript_variant                                   |
| rs1310619482 | intron_variant,missense_variant,coding_sequence_variant                                                                 |
| rs1310643465 | intron_variant,genic_downstream_transcript_variant                                                                      |
| rs1310651658 | intron_variant,non_coding_transcript_variant,genic_upstream_transcript_variant,5_prime_UTR_variant                      |
| rs1310710739 | intron_variant,genic_upstream_transcript_variant                                                                        |
| rs1310741467 | intron_variant,genic_downstream_transcript_variant                                                                      |

|              |                                                                                                              |
|--------------|--------------------------------------------------------------------------------------------------------------|
| rs1310747650 | intron_variant,genic_upstream_transcript_variant                                                             |
| rs1310786944 | intron_variant,genic_upstream_transcript_variant                                                             |
| rs1310800288 | intron_variant                                                                                               |
| rs1310803113 | intron_variant,genic_upstream_transcript_variant                                                             |
| rs1310832219 | non_coding_transcript_variant,synonymous_variant,genic_downstream_transcript_variant,coding_sequence_variant |
| rs1310887358 | intron_variant,genic_upstream_transcript_variant                                                             |
| rs1310887943 | intron_variant,genic_upstream_transcript_variant                                                             |
| rs1310903240 | intron_variant                                                                                               |
| rs1310908391 | intron_variant                                                                                               |
| rs1310910925 | intron_variant,genic_upstream_transcript_variant                                                             |
| rs1310964979 | non_coding_transcript_variant,3_prime_UTR_variant,genic_downstream_transcript_variant                        |
| rs1310987823 | intron_variant,genic_upstream_transcript_variant                                                             |
| rs1311030513 | intron_variant                                                                                               |
| rs1311050999 | intron_variant,genic_upstream_transcript_variant                                                             |
| rs1311091263 | intron_variant                                                                                               |
| rs1311094713 | intron_variant,genic_upstream_transcript_variant                                                             |
| rs1311145277 | intron_variant,genic_upstream_transcript_variant                                                             |
| rs1311158792 | intron_variant,upstream_transcript_variant,genic_upstream_transcript_variant                                 |
| rs1311171795 | intron_variant                                                                                               |
| rs1311172244 | intron_variant                                                                                               |
| rs1311187997 | intron_variant                                                                                               |
| rs1311241742 | intron_variant,genic_upstream_transcript_variant                                                             |
| rs1311257743 | intron_variant,genic_downstream_transcript_variant                                                           |
| rs1311260141 | intron_variant,genic_upstream_transcript_variant                                                             |
| rs1311298215 | intron_variant,genic_downstream_transcript_variant                                                           |
| rs1311308159 | intron_variant                                                                                               |
| rs1311389149 | intron_variant                                                                                               |
| rs1311442112 | intron_variant,genic_upstream_transcript_variant                                                             |
| rs1311461295 | intron_variant,genic_downstream_transcript_variant                                                           |
| rs1311467716 | intron_variant                                                                                               |
| rs1311477661 | intron_variant                                                                                               |
| rs1311521382 | intron_variant                                                                                               |
| rs1311569481 | intron_variant                                                                                               |
| rs1311605781 | intron_variant,genic_upstream_transcript_variant                                                             |
| rs1311644064 | intron_variant                                                                                               |
| rs1311693340 | intron_variant                                                                                               |
| rs1311728402 | intron_variant                                                                                               |
| rs1311742622 | intron_variant,genic_upstream_transcript_variant                                                             |
| rs1311768807 | intron_variant,genic_downstream_transcript_variant                                                           |
| rs1311773989 | intron_variant,2KB_upstream_variant,upstream_transcript_variant,genic_upstream_transcript_variant            |
| rs1311836650 | intron_variant                                                                                               |
| rs1311850323 | intron_variant,genic_upstream_transcript_variant                                                             |
| rs1311922319 | intron_variant                                                                                               |
| rs1311936526 | intron_variant,genic_upstream_transcript_variant                                                             |
| rs1311972922 | intron_variant                                                                                               |
| rs1311983597 | missense_variant,non_coding_transcript_variant,genic_downstream_transcript_variant,coding_sequence_variant   |
| rs1311998419 | intron_variant,genic_downstream_transcript_variant                                                           |
| rs1312007874 | intron_variant                                                                                               |
| rs1312042851 | intron_variant,genic_upstream_transcript_variant                                                             |
| rs1312106881 | intron_variant                                                                                               |
| rs1312139095 | intron_variant,genic_downstream_transcript_variant                                                           |
| rs1312144662 | intron_variant,genic_upstream_transcript_variant                                                             |
| rs1312156280 | intron_variant,genic_upstream_transcript_variant                                                             |
| rs1312159802 | intron_variant,genic_upstream_transcript_variant                                                             |
| rs1312170986 | intron_variant,genic_downstream_transcript_variant                                                           |
| rs1312171732 | intron_variant,genic_downstream_transcript_variant                                                           |
| rs1312252459 | intron_variant,genic_upstream_transcript_variant                                                             |
| rs1312286749 | intron_variant,genic_downstream_transcript_variant                                                           |
| rs1312300932 | intron_variant                                                                                               |
| rs1312322680 | intron_variant,genic_downstream_transcript_variant                                                           |
| rs1312392351 | intron_variant,genic_downstream_transcript_variant                                                           |
| rs1312439984 | intron_variant,genic_downstream_transcript_variant                                                           |
| rs1312503717 | intron_variant,genic_upstream_transcript_variant                                                             |
| rs1312515497 | intron_variant                                                                                               |
| rs1312527529 | intron_variant,genic_upstream_transcript_variant                                                             |
| rs1312532343 | intron_variant,upstream_transcript_variant,genic_upstream_transcript_variant                                 |
| rs1312593517 | intron_variant,2KB_upstream_variant,upstream_transcript_variant,genic_upstream_transcript_variant            |
| rs1312596041 | intron_variant,genic_upstream_transcript_variant                                                             |
| rs1312641375 | intron_variant,genic_upstream_transcript_variant                                                             |
| rs1312699411 | intron_variant,genic_downstream_transcript_variant                                                           |
| rs1312719048 | intron_variant                                                                                               |
| rs1312761234 | intron_variant                                                                                               |
| rs1312781407 | intron_variant                                                                                               |
| rs1312798093 | intron_variant,genic_upstream_transcript_variant                                                             |

|              |                                                                                                   |
|--------------|---------------------------------------------------------------------------------------------------|
| rs1312816921 | intron_variant,genic_upstream_transcript_variant                                                  |
| rs1312838552 | intron_variant,genic_downstream_transcript_variant                                                |
| rs1312860654 | intron_variant                                                                                    |
| rs1312910217 | intron_variant,genic_upstream_transcript_variant                                                  |
| rs1312923839 | intron_variant,genic_upstream_transcript_variant                                                  |
| rs1313008707 | intron_variant                                                                                    |
| rs1313032767 | intron_variant                                                                                    |
| rs1313040813 | intron_variant,genic_upstream_transcript_variant                                                  |
| rs1313096882 | intron_variant                                                                                    |
| rs1313121708 | intron_variant,genic_upstream_transcript_variant                                                  |
| rs1313136198 | intron_variant,genic_downstream_transcript_variant                                                |
| rs1313150532 | intron_variant                                                                                    |
| rs1313161693 | intron_variant                                                                                    |
| rs1313162007 | intron_variant,genic_upstream_transcript_variant                                                  |
| rs1313206098 | intron_variant,genic_downstream_transcript_variant                                                |
| rs1313227253 | intron_variant,genic_upstream_transcript_variant                                                  |
| rs1313241609 | intron_variant,genic_upstream_transcript_variant                                                  |
| rs1313257892 | intron_variant,genic_upstream_transcript_variant                                                  |
| rs1313290480 | intron_variant,genic_upstream_transcript_variant                                                  |
| rs1313293093 | intron_variant,genic_upstream_transcript_variant                                                  |
| rs1313361854 | intron_variant                                                                                    |
| rs1313395317 | intron_variant,genic_downstream_transcript_variant                                                |
| rs1313408176 | intron_variant,genic_upstream_transcript_variant                                                  |
| rs1313420103 | intron_variant,genic_upstream_transcript_variant                                                  |
| rs1313449372 | intron_variant,genic_downstream_transcript_variant                                                |
| rs1313499311 | intron_variant                                                                                    |
| rs1313512551 | intron_variant                                                                                    |
| rs1313568976 | intron_variant,genic_downstream_transcript_variant                                                |
| rs1313596143 | intron_variant,genic_upstream_transcript_variant                                                  |
| rs1313606827 | intron_variant,genic_upstream_transcript_variant                                                  |
| rs1313679643 | intron_variant                                                                                    |
| rs1313700078 | intron_variant                                                                                    |
| rs1313706663 | intron_variant,genic_upstream_transcript_variant                                                  |
| rs1313768228 | intron_variant                                                                                    |
| rs1313787614 | intron_variant,genic_upstream_transcript_variant                                                  |
| rs1313841562 | intron_variant,genic_upstream_transcript_variant                                                  |
| rs1313939591 | intron_variant,genic_upstream_transcript_variant                                                  |
| rs1313942631 | intron_variant                                                                                    |
| rs1313948364 | intron_variant,genic_upstream_transcript_variant                                                  |
| rs1313955104 | intron_variant                                                                                    |
| rs1313961511 | intron_variant                                                                                    |
| rs1313972395 | intron_variant                                                                                    |
| rs1314014455 | intron_variant,genic_upstream_transcript_variant                                                  |
| rs1314045268 | intron_variant,genic_upstream_transcript_variant                                                  |
| rs1314066690 | intron_variant,genic_upstream_transcript_variant                                                  |
| rs1314080905 | intron_variant                                                                                    |
| rs1314084671 | intron_variant,genic_upstream_transcript_variant                                                  |
| rs1314101981 | intron_variant                                                                                    |
| rs1314103016 | intron_variant,genic_downstream_transcript_variant                                                |
| rs1314210311 | intron_variant,genic_downstream_transcript_variant                                                |
| rs1314210830 | intron_variant,genic_downstream_transcript_variant                                                |
| rs1314212790 | intron_variant,genic_upstream_transcript_variant                                                  |
| rs1314242184 | intron_variant,genic_upstream_transcript_variant                                                  |
| rs1314244685 | intron_variant                                                                                    |
| rs1314246978 | intron_variant,genic_upstream_transcript_variant                                                  |
| rs1314253250 | intron_variant,genic_downstream_transcript_variant                                                |
| rs1314254870 | intron_variant,genic_downstream_transcript_variant                                                |
| rs1314265312 | intron_variant                                                                                    |
| rs1314299624 | intron_variant,2KB_upstream_variant,upstream_transcript_variant,genic_upstream_transcript_variant |
| rs1314316832 | intron_variant                                                                                    |
| rs1314349950 | intron_variant,genic_downstream_transcript_variant                                                |
| rs1314351657 | intron_variant,genic_upstream_transcript_variant                                                  |
| rs1314362625 | intron_variant,2KB_upstream_variant,upstream_transcript_variant,genic_upstream_transcript_variant |
| rs1314389070 | intron_variant                                                                                    |
| rs1314433862 | intron_variant,genic_upstream_transcript_variant                                                  |
| rs1314460059 | intron_variant                                                                                    |
| rs1314471932 | intron_variant                                                                                    |
| rs1314485150 | intron_variant                                                                                    |
| rs1314499806 | intron_variant,genic_upstream_transcript_variant                                                  |
| rs1314501420 | intron_variant,genic_upstream_transcript_variant                                                  |
| rs1314566498 | intron_variant,genic_downstream_transcript_variant                                                |
| rs1314580840 | intron_variant,genic_upstream_transcript_variant                                                  |
| rs1314596653 | intron_variant,genic_downstream_transcript_variant                                                |
| rs1314633310 | intron_variant,genic_upstream_transcript_variant                                                  |

|              |                                                                                                   |
|--------------|---------------------------------------------------------------------------------------------------|
| rs1314660916 | intron_variant                                                                                    |
| rs1314673705 | intron_variant,genic_downstream_transcript_variant                                                |
| rs1314714445 | intron_variant,genic_upstream_transcript_variant                                                  |
| rs1314723459 | intron_variant,upstream_transcript_variant,genic_upstream_transcript_variant                      |
| rs1314733877 | intron_variant                                                                                    |
| rs1314775000 | intron_variant,genic_upstream_transcript_variant                                                  |
| rs1314812346 | intron_variant,genic_upstream_transcript_variant                                                  |
| rs1314827480 | intron_variant,2KB_upstream_variant,upstream_transcript_variant,genic_upstream_transcript_variant |
| rs1314836783 | intron_variant,genic_downstream_transcript_variant                                                |
| rs1314847440 | intron_variant,genic_upstream_transcript_variant                                                  |
| rs1314882291 | intron_variant,genic_upstream_transcript_variant                                                  |
| rs1314886088 | intron_variant,genic_downstream_transcript_variant                                                |
| rs1314890057 | intron_variant                                                                                    |
| rs1314904039 | intron_variant                                                                                    |
| rs1314918749 | intron_variant                                                                                    |
| rs1314949728 | intron_variant                                                                                    |
| rs1314952457 | intron_variant,genic_downstream_transcript_variant                                                |
| rs1314965037 | intron_variant                                                                                    |
| rs1314967077 | intron_variant,genic_downstream_transcript_variant                                                |
| rs1314969875 | intron_variant,genic_upstream_transcript_variant                                                  |
| rs1314996451 | intron_variant,genic_upstream_transcript_variant                                                  |
| rs1315052534 | intron_variant                                                                                    |
| rs1315070148 | intron_variant,genic_upstream_transcript_variant                                                  |
| rs1315101846 | intron_variant,genic_upstream_transcript_variant                                                  |
| rs1315105938 | intron_variant                                                                                    |
| rs1315122312 | intron_variant,genic_upstream_transcript_variant                                                  |
| rs1315135764 | intron_variant                                                                                    |
| rs1315193738 | intron_variant,genic_upstream_transcript_variant                                                  |
| rs1315217323 | intron_variant,genic_upstream_transcript_variant                                                  |
| rs1315301481 | intron_variant                                                                                    |
| rs1315302912 | intron_variant                                                                                    |
| rs1315323526 | intron_variant,genic_upstream_transcript_variant                                                  |
| rs1315366426 | intron_variant                                                                                    |
| rs1315373642 | intron_variant                                                                                    |
| rs1315407112 | intron_variant,genic_downstream_transcript_variant                                                |
| rs1315454302 | intron_variant                                                                                    |
| rs1315460255 | intron_variant,2KB_upstream_variant,upstream_transcript_variant,genic_upstream_transcript_variant |
| rs1315468146 | intron_variant,genic_upstream_transcript_variant                                                  |
| rs1315473226 | intron_variant,2KB_upstream_variant,upstream_transcript_variant,genic_upstream_transcript_variant |
| rs1315475370 | intron_variant,upstream_transcript_variant,genic_upstream_transcript_variant                      |
| rs1315485265 | intron_variant,genic_downstream_transcript_variant                                                |
| rs1315489413 | intron_variant,genic_upstream_transcript_variant                                                  |
| rs1315499829 | intron_variant,genic_downstream_transcript_variant                                                |
| rs1315508035 | intron_variant,genic_upstream_transcript_variant                                                  |
| rs1315520596 | non_coding_transcript_variant,3_prime_UTR_variant,genic_downstream_transcript_variant             |
| rs1315533938 | intron_variant,upstream_transcript_variant,genic_upstream_transcript_variant                      |
| rs1315607296 | intron_variant,genic_upstream_transcript_variant                                                  |
| rs1315611464 | intron_variant,genic_downstream_transcript_variant                                                |
| rs1315676476 | intron_variant,2KB_upstream_variant,upstream_transcript_variant,genic_upstream_transcript_variant |
| rs1315681743 | intron_variant                                                                                    |
| rs1315718744 | intron_variant,genic_downstream_transcript_variant                                                |
| rs1315732511 | intron_variant                                                                                    |
| rs1315737119 | intron_variant                                                                                    |
| rs1315749816 | intron_variant,genic_upstream_transcript_variant                                                  |
| rs1315774152 | intron_variant,genic_upstream_transcript_variant                                                  |
| rs1315793874 | intron_variant                                                                                    |
| rs1315794875 | intron_variant                                                                                    |
| rs1315824987 | intron_variant,upstream_transcript_variant,genic_upstream_transcript_variant                      |
| rs1315845555 | intron_variant,genic_upstream_transcript_variant                                                  |
| rs1315893381 | intron_variant,genic_upstream_transcript_variant                                                  |
| rs1315973226 | intron_variant,genic_downstream_transcript_variant                                                |
| rs1316028931 | intron_variant,genic_upstream_transcript_variant                                                  |
| rs1316047252 | intron_variant                                                                                    |
| rs1316069752 | intron_variant,genic_downstream_transcript_variant                                                |
| rs1316113803 | intron_variant,genic_upstream_transcript_variant                                                  |
| rs1316145404 | intron_variant                                                                                    |
| rs1316168791 | intron_variant,genic_upstream_transcript_variant                                                  |
| rs1316168915 | intron_variant                                                                                    |
| rs1316188443 | intron_variant,genic_downstream_transcript_variant                                                |
| rs1316298233 | intron_variant,genic_upstream_transcript_variant                                                  |
| rs1316323838 | intron_variant,genic_downstream_transcript_variant                                                |
| rs1316330750 | intron_variant                                                                                    |
| rs1316338721 | intron_variant                                                                                    |
| rs1316353233 | intron_variant,genic_upstream_transcript_variant                                                  |

|              |                                                                                                                           |
|--------------|---------------------------------------------------------------------------------------------------------------------------|
| rs1316362726 | intron_variant,genic_upstream_transcript_variant                                                                          |
| rs1316404138 | intron_variant,genic_upstream_transcript_variant                                                                          |
| rs1316481945 | intron_variant,genic_upstream_transcript_variant                                                                          |
| rs1316497333 | intron_variant                                                                                                            |
| rs1316500207 | intron_variant,genic_downstream_transcript_variant                                                                        |
| rs1316548396 | intron_variant                                                                                                            |
| rs1316581869 | non_coding_transcript_variant,intron_variant,synonymous_variant,genic_upstream_transcript_variant,coding_sequence_variant |
| rs1316660881 | intron_variant,genic_upstream_transcript_variant                                                                          |
| rs1316707712 | intron_variant,genic_upstream_transcript_variant                                                                          |
| rs1316755781 | intron_variant,genic_downstream_transcript_variant                                                                        |
| rs1316758352 | intron_variant,genic_upstream_transcript_variant                                                                          |
| rs1316763701 | intron_variant,genic_upstream_transcript_variant                                                                          |
| rs1316770425 | intron_variant                                                                                                            |
| rs1316772781 | intron_variant,genic_upstream_transcript_variant                                                                          |
| rs1316825870 | intron_variant,genic_upstream_transcript_variant                                                                          |
| rs1316833722 | intron_variant,genic_upstream_transcript_variant                                                                          |
| rs1316846123 | intron_variant,genic_upstream_transcript_variant                                                                          |
| rs1316854950 | intron_variant                                                                                                            |
| rs1316926135 | intron_variant                                                                                                            |
| rs1316931320 | intron_variant,genic_upstream_transcript_variant                                                                          |
| rs1317014866 | intron_variant,genic_downstream_transcript_variant                                                                        |
| rs1317049899 | intron_variant                                                                                                            |
| rs1317069464 | intron_variant,genic_upstream_transcript_variant                                                                          |
| rs1317085466 | intron_variant                                                                                                            |
| rs1317096267 | intron_variant,genic_downstream_transcript_variant                                                                        |
| rs1317100437 | intron_variant,genic_upstream_transcript_variant                                                                          |
| rs1317141254 | intron_variant,genic_downstream_transcript_variant                                                                        |
| rs1317143188 | intron_variant                                                                                                            |
| rs1317148095 | intron_variant,genic_upstream_transcript_variant                                                                          |
| rs1317158856 | intron_variant,genic_upstream_transcript_variant                                                                          |
| rs1317223702 | intron_variant,genic_upstream_transcript_variant                                                                          |
| rs1317226279 | intron_variant,genic_upstream_transcript_variant                                                                          |
| rs1317252459 | intron_variant                                                                                                            |
| rs1317268165 | intron_variant,genic_downstream_transcript_variant                                                                        |
| rs1317289343 | intron_variant                                                                                                            |
| rs1317304202 | intron_variant                                                                                                            |
| rs1317385076 | intron_variant                                                                                                            |
| rs1317401028 | intron_variant,genic_upstream_transcript_variant                                                                          |
| rs1317402858 | intron_variant                                                                                                            |
| rs1317434153 | intron_variant                                                                                                            |
| rs1317507594 | intron_variant,genic_upstream_transcript_variant                                                                          |
| rs1317528549 | intron_variant                                                                                                            |
| rs1317539640 | intron_variant,genic_upstream_transcript_variant                                                                          |
| rs1317620369 | intron_variant                                                                                                            |
| rs1317631627 | intron_variant                                                                                                            |
| rs1317645768 | intron_variant,2KB_upstream_variant,upstream_transcript_variant,genic_upstream_transcript_variant                         |
| rs1317670956 | intron_variant,genic_upstream_transcript_variant                                                                          |
| rs1317693557 | intron_variant,genic_upstream_transcript_variant                                                                          |
| rs1317729018 | intron_variant,genic_upstream_transcript_variant                                                                          |
| rs1317744056 | intron_variant,genic_upstream_transcript_variant                                                                          |
| rs1317780444 | intron_variant,genic_upstream_transcript_variant                                                                          |
| rs1317792157 | intron_variant,genic_upstream_transcript_variant                                                                          |
| rs1317802984 | intron_variant,upstream_transcript_variant,genic_upstream_transcript_variant                                              |
| rs1317820599 | intron_variant                                                                                                            |
| rs1317861730 | intron_variant                                                                                                            |
| rs1317867672 | intron_variant,genic_upstream_transcript_variant                                                                          |
| rs1317895159 | non_coding_transcript_variant,3_prime_UTR_variant,genic_downstream_transcript_variant                                     |
| rs1317898349 | intron_variant,genic_upstream_transcript_variant                                                                          |
| rs1317917702 | intron_variant                                                                                                            |
| rs1317919095 | intron_variant,genic_upstream_transcript_variant                                                                          |
| rs1317932193 | intron_variant                                                                                                            |
| rs1317971041 | intron_variant,genic_upstream_transcript_variant                                                                          |
| rs1317971935 | intron_variant,genic_downstream_transcript_variant                                                                        |
| rs1317988356 | intron_variant,genic_upstream_transcript_variant                                                                          |
| rs1317999170 | intron_variant,genic_upstream_transcript_variant                                                                          |
| rs1318015893 | intron_variant,genic_downstream_transcript_variant                                                                        |
| rs1318018459 | intron_variant                                                                                                            |
| rs1318041627 | intron_variant,genic_upstream_transcript_variant                                                                          |
| rs1318044138 | intron_variant,genic_upstream_transcript_variant                                                                          |
| rs1318093823 | intron_variant,genic_downstream_transcript_variant                                                                        |
| rs1318101371 | intron_variant,genic_upstream_transcript_variant                                                                          |
| rs1318112013 | intron_variant,genic_upstream_transcript_variant                                                                          |
| rs1318129903 | intron_variant                                                                                                            |
| rs1318134586 | intron_variant                                                                                                            |

|              |                                                                                                            |
|--------------|------------------------------------------------------------------------------------------------------------|
| rs1318152785 | intron_variant,genic_upstream_transcript_variant                                                           |
| rs1318169583 | intron_variant                                                                                             |
| rs1318190870 | intron_variant,genic_upstream_transcript_variant                                                           |
| rs1318193394 | intron_variant,upstream_transcript_variant,genic_upstream_transcript_variant                               |
| rs1318218096 | intron_variant,genic_downstream_transcript_variant                                                         |
| rs1318238016 | intron_variant                                                                                             |
| rs1318238025 | intron_variant,upstream_transcript_variant,genic_upstream_transcript_variant                               |
| rs1318264169 | intron_variant,genic_upstream_transcript_variant                                                           |
| rs1318307677 | intron_variant,genic_downstream_transcript_variant                                                         |
| rs1318309834 | intron_variant,genic_upstream_transcript_variant                                                           |
| rs1318314904 | intron_variant                                                                                             |
| rs1318317624 | intron_variant,genic_upstream_transcript_variant                                                           |
| rs1318335190 | intron_variant,genic_upstream_transcript_variant                                                           |
| rs1318361513 | intron_variant                                                                                             |
| rs1318399253 | intron_variant,genic_upstream_transcript_variant                                                           |
| rs1318418086 | intron_variant                                                                                             |
| rs1318422004 | intron_variant                                                                                             |
| rs1318484930 | intron_variant                                                                                             |
| rs1318488047 | intron_variant                                                                                             |
| rs1318492672 | non_coding_transcript_variant,3_prime_UTR_variant,genic_downstream_transcript_variant                      |
| rs1318500804 | intron_variant,genic_upstream_transcript_variant                                                           |
| rs1318551704 | intron_variant                                                                                             |
| rs1318611404 | synonymous_variant,non_coding_transcript_variant,coding_sequence_variant                                   |
| rs1318622991 | intron_variant,genic_downstream_transcript_variant                                                         |
| rs1318638076 | missense_variant,non_coding_transcript_variant,genic_downstream_transcript_variant,coding_sequence_variant |
| rs1318656483 | intron_variant,genic_upstream_transcript_variant                                                           |
| rs1318721401 | intron_variant,genic_upstream_transcript_variant                                                           |
| rs1318732623 | intron_variant                                                                                             |
| rs1318759264 | intron_variant,genic_downstream_transcript_variant                                                         |
| rs1318767968 | intron_variant                                                                                             |
| rs1318829346 | intron_variant                                                                                             |
| rs1318839357 | intron_variant                                                                                             |
| rs1318848496 | intron_variant                                                                                             |
| rs1318878799 | intron_variant                                                                                             |
| rs1318889211 | intron_variant,upstream_transcript_variant,genic_upstream_transcript_variant                               |
| rs1318963633 | intron_variant,genic_downstream_transcript_variant                                                         |
| rs1318963676 | intron_variant                                                                                             |
| rs1318989606 | missense_variant,non_coding_transcript_variant,coding_sequence_variant                                     |
| rs1319044097 | intron_variant,genic_upstream_transcript_variant                                                           |
| rs1319050655 | intron_variant,genic_downstream_transcript_variant                                                         |
| rs1319063223 | intron_variant,genic_downstream_transcript_variant                                                         |
| rs1319076081 | intron_variant,genic_upstream_transcript_variant                                                           |
| rs1319077915 | intron_variant                                                                                             |
| rs1319078911 | intron_variant,genic_downstream_transcript_variant                                                         |
| rs1319115034 | intron_variant,genic_upstream_transcript_variant                                                           |
| rs1319124374 | intron_variant,genic_upstream_transcript_variant                                                           |
| rs1319194264 | intron_variant,genic_upstream_transcript_variant                                                           |
| rs1319330211 | intron_variant,2KB_upstream_variant,upstream_transcript_variant,genic_upstream_transcript_variant          |
| rs1319336075 | intron_variant,genic_upstream_transcript_variant                                                           |
| rs1319341405 | intron_variant,genic_upstream_transcript_variant                                                           |
| rs1319363254 | intron_variant                                                                                             |
| rs1319396999 | intron_variant                                                                                             |
| rs1319450660 | intron_variant                                                                                             |
| rs1319462130 | intron_variant,genic_upstream_transcript_variant                                                           |
| rs1319473127 | intron_variant,genic_upstream_transcript_variant                                                           |
| rs1319496434 | intron_variant,genic_upstream_transcript_variant                                                           |
| rs1319545780 | intron_variant,genic_upstream_transcript_variant                                                           |
| rs1319555960 | synonymous_variant,non_coding_transcript_variant,coding_sequence_variant                                   |
| rs1319584109 | intron_variant                                                                                             |
| rs1319595534 | intron_variant,genic_downstream_transcript_variant                                                         |
| rs1319617654 | intron_variant,genic_upstream_transcript_variant                                                           |
| rs1319621529 | intron_variant,genic_upstream_transcript_variant                                                           |
| rs1319633623 | intron_variant,genic_upstream_transcript_variant                                                           |
| rs1319645354 | intron_variant,genic_upstream_transcript_variant                                                           |
| rs1319682630 | intron_variant                                                                                             |
| rs1319711175 | intron_variant,genic_downstream_transcript_variant                                                         |
| rs1319799684 | intron_variant                                                                                             |
| rs1319841199 | intron_variant,2KB_upstream_variant,upstream_transcript_variant,genic_upstream_transcript_variant          |
| rs1319852252 | intron_variant,genic_upstream_transcript_variant                                                           |
| rs1319855597 | intron_variant,genic_upstream_transcript_variant                                                           |
| rs1319885933 | intron_variant                                                                                             |
| rs1319913612 | intron_variant                                                                                             |
| rs1319938110 | intron_variant,genic_upstream_transcript_variant                                                           |
| rs1319968419 | intron_variant                                                                                             |

|              |                                                                                                   |
|--------------|---------------------------------------------------------------------------------------------------|
| rs1319986428 | intron_variant,genic_upstream_transcript_variant                                                  |
| rs1320018937 | intron_variant,genic_upstream_transcript_variant                                                  |
| rs1320027830 | intron_variant,genic_upstream_transcript_variant                                                  |
| rs1320074432 | intron_variant                                                                                    |
| rs1320099793 | intron_variant,genic_upstream_transcript_variant                                                  |
| rs1320163570 | intron_variant,genic_upstream_transcript_variant                                                  |
| rs1320167135 | intron_variant,genic_upstream_transcript_variant                                                  |
| rs1320178418 | intron_variant                                                                                    |
| rs1320179292 | intron_variant,genic_upstream_transcript_variant                                                  |
| rs1320196271 | intron_variant                                                                                    |
| rs1320227357 | intron_variant                                                                                    |
| rs1320255340 | intron_variant                                                                                    |
| rs1320271311 | intron_variant,genic_upstream_transcript_variant                                                  |
| rs1320300297 | intron_variant                                                                                    |
| rs1320314120 | intron_variant,genic_upstream_transcript_variant                                                  |
| rs1320317425 | intron_variant                                                                                    |
| rs1320331688 | intron_variant                                                                                    |
| rs1320345314 | intron_variant,upstream_transcript_variant,genic_upstream_transcript_variant                      |
| rs1320372231 | intron_variant,genic_upstream_transcript_variant                                                  |
| rs1320390013 | intron_variant,genic_upstream_transcript_variant                                                  |
| rs1320412256 | intron_variant,genic_upstream_transcript_variant                                                  |
| rs1320458607 | intron_variant,genic_upstream_transcript_variant                                                  |
| rs1320468228 | intron_variant                                                                                    |
| rs1320468925 | intron_variant                                                                                    |
| rs1320479541 | intron_variant,genic_downstream_transcript_variant                                                |
| rs1320496007 | intron_variant                                                                                    |
| rs1320527721 | intron_variant,genic_upstream_transcript_variant                                                  |
| rs1320536749 | intron_variant                                                                                    |
| rs1320541463 | intron_variant,genic_downstream_transcript_variant                                                |
| rs1320570570 | intron_variant,2KB_upstream_variant,upstream_transcript_variant,genic_upstream_transcript_variant |
| rs1320597331 | intron_variant,genic_downstream_transcript_variant                                                |
| rs1320601559 | intron_variant                                                                                    |
| rs1320682989 | intron_variant,genic_upstream_transcript_variant                                                  |
| rs1320690274 | intron_variant,genic_upstream_transcript_variant                                                  |
| rs1320692896 | intron_variant,genic_downstream_transcript_variant                                                |
| rs1320714016 | intron_variant,upstream_transcript_variant,genic_upstream_transcript_variant                      |
| rs1320741403 | intron_variant,genic_upstream_transcript_variant                                                  |
| rs1320742117 | intron_variant                                                                                    |
| rs1320744670 | intron_variant                                                                                    |
| rs1320801769 | intron_variant                                                                                    |
| rs1320813311 | intron_variant                                                                                    |
| rs1320814164 | intron_variant,genic_upstream_transcript_variant                                                  |
| rs1320818173 | intron_variant                                                                                    |
| rs1320868707 | intron_variant,genic_upstream_transcript_variant                                                  |
| rs1320874990 | intron_variant,genic_upstream_transcript_variant                                                  |
| rs1320900784 | intron_variant,genic_downstream_transcript_variant                                                |
| rs1320918996 | intron_variant                                                                                    |
| rs1320942111 | intron_variant,genic_upstream_transcript_variant                                                  |
| rs1320995226 | intron_variant                                                                                    |
| rs1321043011 | intron_variant                                                                                    |
| rs1321072964 | intron_variant,genic_upstream_transcript_variant                                                  |
| rs1321081598 | intron_variant,genic_upstream_transcript_variant                                                  |
| rs1321085240 | intron_variant,genic_upstream_transcript_variant                                                  |
| rs1321148900 | intron_variant,genic_upstream_transcript_variant                                                  |
| rs1321166532 | intron_variant                                                                                    |
| rs1321185662 | intron_variant,genic_upstream_transcript_variant                                                  |
| rs1321268752 | intron_variant,genic_downstream_transcript_variant                                                |
| rs1321269120 | intron_variant,upstream_transcript_variant,genic_upstream_transcript_variant                      |
| rs1321270978 | intron_variant,genic_upstream_transcript_variant                                                  |
| rs1321272696 | intron_variant,genic_upstream_transcript_variant                                                  |
| rs1321373360 | non_coding_transcript_variant,3_prime_UTR_variant,genic_downstream_transcript_variant             |
| rs1321397765 | intron_variant                                                                                    |
| rs1321435511 | intron_variant,genic_downstream_transcript_variant                                                |
| rs1321441526 | intron_variant,upstream_transcript_variant,5_prime_UTR_variant,genic_upstream_transcript_variant  |
| rs1321451850 | intron_variant,genic_downstream_transcript_variant                                                |
| rs1321453622 | intron_variant,genic_downstream_transcript_variant                                                |
| rs1321500965 | intron_variant,genic_upstream_transcript_variant                                                  |
| rs1321528450 | intron_variant,genic_downstream_transcript_variant                                                |
| rs1321540103 | intron_variant,genic_upstream_transcript_variant                                                  |
| rs1321554895 | intron_variant,genic_upstream_transcript_variant                                                  |
| rs1321563617 | intron_variant                                                                                    |
| rs1321586526 | intron_variant,genic_upstream_transcript_variant                                                  |
| rs1321617672 | intron_variant,genic_downstream_transcript_variant                                                |
| rs1321619225 | intron_variant                                                                                    |

|              |                                                                                                              |
|--------------|--------------------------------------------------------------------------------------------------------------|
| rs1321792768 | intron_variant                                                                                               |
| rs1321794883 | intron_variant,genic_upstream_transcript_variant                                                             |
| rs1321795295 | intron_variant,genic_upstream_transcript_variant                                                             |
| rs1321808230 | intron_variant                                                                                               |
| rs1321830924 | intron_variant,genic_downstream_transcript_variant                                                           |
| rs1321841155 | intron_variant,genic_upstream_transcript_variant                                                             |
| rs1321872678 | intron_variant,genic_upstream_transcript_variant                                                             |
| rs1321921325 | intron_variant,genic_downstream_transcript_variant                                                           |
| rs1321931532 | intron_variant                                                                                               |
| rs1321933627 | intron_variant,genic_upstream_transcript_variant                                                             |
| rs1321959949 | intron_variant,5_prime_UTR_variant                                                                           |
| rs1321966340 | intron_variant,genic_upstream_transcript_variant                                                             |
| rs1322057499 | intron_variant,genic_upstream_transcript_variant                                                             |
| rs1322059884 | intron_variant,upstream_transcript_variant,genic_upstream_transcript_variant                                 |
| rs1322067458 | missense_variant,non_coding_transcript_variant,coding_sequence_variant                                       |
| rs1322077881 | intron_variant,genic_upstream_transcript_variant                                                             |
| rs1322084786 | intron_variant,genic_upstream_transcript_variant                                                             |
| rs1322183460 | intron_variant,genic_upstream_transcript_variant                                                             |
| rs1322186460 | intron_variant,genic_upstream_transcript_variant                                                             |
| rs1322202293 | non_coding_transcript_variant,coding_sequence_variant,synonymous_variant                                     |
| rs1322223442 | intron_variant                                                                                               |
| rs1322245914 | intron_variant                                                                                               |
| rs1322344567 | 3_prime_UTR_variant,genic_downstream_transcript_variant,non_coding_transcript_variant                        |
| rs1322362224 | intron_variant,genic_upstream_transcript_variant                                                             |
| rs1322364607 | intron_variant,genic_downstream_transcript_variant                                                           |
| rs1322412267 | intron_variant                                                                                               |
| rs1322422810 | intron_variant,genic_downstream_transcript_variant                                                           |
| rs1322431113 | intron_variant,genic_upstream_transcript_variant                                                             |
| rs1322527165 | 2KB_upstream_variant,intron_variant,upstream_transcript_variant,genic_upstream_transcript_variant            |
| rs1322528151 | intron_variant,genic_upstream_transcript_variant                                                             |
| rs1322551971 | intron_variant                                                                                               |
| rs1322579389 | intron_variant,genic_upstream_transcript_variant                                                             |
| rs1322579863 | intron_variant,genic_upstream_transcript_variant                                                             |
| rs1322602172 | 2KB_upstream_variant,intron_variant,upstream_transcript_variant,genic_upstream_transcript_variant            |
| rs1322657600 | intron_variant                                                                                               |
| rs1322662483 | intron_variant,genic_downstream_transcript_variant                                                           |
| rs1322702194 | intron_variant                                                                                               |
| rs1322742025 | intron_variant                                                                                               |
| rs1322743378 | intron_variant,genic_upstream_transcript_variant                                                             |
| rs1322770743 | intron_variant                                                                                               |
| rs1322805200 | intron_variant,genic_upstream_transcript_variant                                                             |
| rs1322856265 | intron_variant,genic_upstream_transcript_variant                                                             |
| rs1322880807 | intron_variant,genic_downstream_transcript_variant                                                           |
| rs1322893269 | genic_downstream_transcript_variant,non_coding_transcript_variant,coding_sequence_variant,synonymous_variant |
| rs1322910262 | intron_variant                                                                                               |
| rs1322940581 | intron_variant,genic_upstream_transcript_variant                                                             |
| rs1322961078 | intron_variant                                                                                               |
| rs1322968009 | intron_variant,genic_upstream_transcript_variant                                                             |
| rs1322973213 | intron_variant,genic_downstream_transcript_variant                                                           |
| rs1322992542 | intron_variant                                                                                               |
| rs1323023024 | intron_variant                                                                                               |
| rs1323083590 | intron_variant                                                                                               |
| rs1323087416 | intron_variant,genic_upstream_transcript_variant                                                             |
| rs1323109627 | intron_variant,genic_downstream_transcript_variant                                                           |
| rs1323158874 | intron_variant,genic_downstream_transcript_variant                                                           |
| rs1323170004 | intron_variant,genic_upstream_transcript_variant                                                             |
| rs1323185444 | 3_prime_UTR_variant,genic_downstream_transcript_variant,non_coding_transcript_variant                        |
| rs1323185967 | intron_variant,genic_upstream_transcript_variant                                                             |
| rs1323192827 | intron_variant,genic_upstream_transcript_variant                                                             |
| rs1323211679 | intron_variant                                                                                               |
| rs1323223900 | intron_variant                                                                                               |
| rs1323244351 | intron_variant                                                                                               |
| rs1323247697 | intron_variant,genic_upstream_transcript_variant                                                             |
| rs1323251142 | intron_variant,genic_downstream_transcript_variant                                                           |
| rs1323259112 | intron_variant                                                                                               |
| rs1323259162 | intron_variant,genic_downstream_transcript_variant                                                           |
| rs1323268249 | intron_variant                                                                                               |
| rs1323269142 | intron_variant                                                                                               |
| rs1323286905 | intron_variant,genic_downstream_transcript_variant                                                           |
| rs1323314530 | downstream_transcript_variant,intron_variant,genic_downstream_transcript_variant                             |
| rs1323315146 | intron_variant,upstream_transcript_variant,genic_upstream_transcript_variant                                 |
| rs1323338287 | intron_variant,genic_upstream_transcript_variant                                                             |
| rs1323381081 | intron_variant,upstream_transcript_variant,genic_upstream_transcript_variant                                 |
| rs1323410809 | intron_variant,genic_downstream_transcript_variant                                                           |

|              |                                                                                                                           |
|--------------|---------------------------------------------------------------------------------------------------------------------------|
| rs1323439654 | intron_variant                                                                                                            |
| rs1323467002 | intron_variant                                                                                                            |
| rs1323480004 | intron_variant                                                                                                            |
| rs1323651888 | intron_variant,genic_upstream_transcript_variant                                                                          |
| rs1323682977 | intron_variant                                                                                                            |
| rs1323687144 | intron_variant,genic_downstream_transcript_variant                                                                        |
| rs1323714356 | intron_variant,genic_upstream_transcript_variant                                                                          |
| rs1323727086 | intron_variant,genic_downstream_transcript_variant                                                                        |
| rs1323736658 | intron_variant                                                                                                            |
| rs1323754044 | intron_variant,genic_downstream_transcript_variant                                                                        |
| rs1323774260 | intron_variant,genic_upstream_transcript_variant                                                                          |
| rs1323791991 | intron_variant                                                                                                            |
| rs1323814035 | intron_variant                                                                                                            |
| rs1323893725 | intron_variant                                                                                                            |
| rs1323903784 | intron_variant,genic_upstream_transcript_variant                                                                          |
| rs1323904766 | intron_variant,genic_upstream_transcript_variant                                                                          |
| rs1323910168 | 2KB_upstream_variant,intron_variant,upstream_transcript_variant,genic_upstream_transcript_variant                         |
| rs1323910749 | 3_prime_UTR_variant,genic_downstream_transcript_variant,non_coding_transcript_variant                                     |
| rs1323939997 | intron_variant                                                                                                            |
| rs1324076277 | intron_variant                                                                                                            |
| rs1324079234 | intron_variant                                                                                                            |
| rs1324089908 | intron_variant,genic_upstream_transcript_variant                                                                          |
| rs1324090725 | intron_variant,genic_upstream_transcript_variant                                                                          |
| rs1324119623 | intron_variant,genic_upstream_transcript_variant                                                                          |
| rs1324148232 | intron_variant,genic_downstream_transcript_variant                                                                        |
| rs1324205447 | intron_variant,genic_upstream_transcript_variant                                                                          |
| rs1324228638 | intron_variant,genic_upstream_transcript_variant                                                                          |
| rs1324233317 | intron_variant                                                                                                            |
| rs1324236890 | intron_variant,genic_downstream_transcript_variant                                                                        |
| rs1324253449 | intron_variant,genic_upstream_transcript_variant                                                                          |
| rs1324314215 | intron_variant,non_coding_transcript_variant,5_prime_UTR_variant,genic_upstream_transcript_variant                        |
| rs1324359680 | intron_variant                                                                                                            |
| rs1324380384 | 3_prime_UTR_variant,genic_downstream_transcript_variant,non_coding_transcript_variant                                     |
| rs1324428942 | intron_variant                                                                                                            |
| rs1324480588 | intron_variant                                                                                                            |
| rs1324527155 | intron_variant,genic_downstream_transcript_variant                                                                        |
| rs1324572782 | coding_sequence_variant,intron_variant,non_coding_transcript_variant,synonymous_variant,genic_upstream_transcript_variant |
| rs1324576950 | non_coding_transcript_variant,coding_sequence_variant,synonymous_variant                                                  |
| rs1324579666 | intron_variant,genic_downstream_transcript_variant                                                                        |
| rs1324604905 | intron_variant                                                                                                            |
| rs1324628450 | intron_variant,genic_upstream_transcript_variant                                                                          |
| rs1324643073 | intron_variant,genic_upstream_transcript_variant                                                                          |
| rs1324690686 | intron_variant,genic_downstream_transcript_variant                                                                        |
| rs1324705743 | intron_variant                                                                                                            |
| rs1324778341 | intron_variant,genic_upstream_transcript_variant                                                                          |
| rs1324818519 | intron_variant                                                                                                            |
| rs1324873050 | intron_variant,genic_upstream_transcript_variant                                                                          |
| rs1324888690 | intron_variant                                                                                                            |
| rs1324913999 | intron_variant,genic_upstream_transcript_variant                                                                          |
| rs1324921567 | intron_variant,genic_upstream_transcript_variant                                                                          |
| rs1324939009 | intron_variant,genic_downstream_transcript_variant                                                                        |
| rs1324987266 | intron_variant,genic_downstream_transcript_variant                                                                        |
| rs1325036336 | 2KB_upstream_variant,intron_variant,upstream_transcript_variant,genic_upstream_transcript_variant                         |
| rs1325054995 | intron_variant,genic_downstream_transcript_variant                                                                        |
| rs1325059737 | intron_variant                                                                                                            |
| rs1325105583 | intron_variant,genic_upstream_transcript_variant                                                                          |
| rs1325112056 | intron_variant,genic_upstream_transcript_variant                                                                          |
| rs1325122929 | intron_variant,genic_upstream_transcript_variant                                                                          |
| rs1325130386 | 2KB_upstream_variant,intron_variant,upstream_transcript_variant,genic_upstream_transcript_variant                         |
| rs1325131038 | intron_variant                                                                                                            |
| rs1325163779 | intron_variant,genic_upstream_transcript_variant                                                                          |
| rs1325192240 | intron_variant                                                                                                            |
| rs1325226416 | intron_variant,genic_downstream_transcript_variant                                                                        |
| rs1325229995 | intron_variant,genic_downstream_transcript_variant                                                                        |
| rs1325285418 | intron_variant,genic_downstream_transcript_variant                                                                        |
| rs1325312662 | intron_variant,genic_downstream_transcript_variant                                                                        |
| rs1325318175 | intron_variant,genic_upstream_transcript_variant                                                                          |
| rs1325409189 | intron_variant                                                                                                            |
| rs1325429134 | intron_variant,genic_upstream_transcript_variant                                                                          |
| rs1325429382 | intron_variant,genic_downstream_transcript_variant                                                                        |
| rs1325441629 | intron_variant                                                                                                            |
| rs1325481654 | intron_variant                                                                                                            |
| rs1325503042 | intron_variant,genic_upstream_transcript_variant                                                                          |
| rs1325516471 | intron_variant,genic_upstream_transcript_variant                                                                          |

|              |                                                                                                   |
|--------------|---------------------------------------------------------------------------------------------------|
| rs1325544646 | intron_variant,genic_upstream_transcript_variant                                                  |
| rs1325553076 | intron_variant,genic_downstream_transcript_variant                                                |
| rs1325555482 | intron_variant,genic_upstream_transcript_variant                                                  |
| rs1325580866 | intron_variant                                                                                    |
| rs1325581534 | intron_variant,genic_downstream_transcript_variant                                                |
| rs1325608145 | intron_variant,genic_upstream_transcript_variant                                                  |
| rs1325624514 | intron_variant                                                                                    |
| rs1325627557 | intron_variant,genic_downstream_transcript_variant                                                |
| rs1325697374 | intron_variant                                                                                    |
| rs1325708558 | intron_variant,genic_upstream_transcript_variant                                                  |
| rs1325710754 | intron_variant                                                                                    |
| rs1325751868 | intron_variant,genic_downstream_transcript_variant                                                |
| rs1325756140 | intron_variant,genic_downstream_transcript_variant                                                |
| rs1325762263 | intron_variant                                                                                    |
| rs1325795587 | intron_variant,genic_upstream_transcript_variant                                                  |
| rs1325814882 | intron_variant,genic_upstream_transcript_variant                                                  |
| rs1325854769 | intron_variant,genic_upstream_transcript_variant                                                  |
| rs1325895008 | intron_variant,genic_downstream_transcript_variant                                                |
| rs1325911075 | intron_variant,upstream_transcript_variant,genic_upstream_transcript_variant                      |
| rs1325929837 | intron_variant                                                                                    |
| rs1325982409 | intron_variant                                                                                    |
| rs1326011916 | intron_variant,genic_upstream_transcript_variant                                                  |
| rs1326033869 | intron_variant                                                                                    |
| rs1326047091 | intron_variant,genic_upstream_transcript_variant                                                  |
| rs1326051668 | intron_variant,genic_downstream_transcript_variant                                                |
| rs1326096172 | intron_variant                                                                                    |
| rs1326099975 | intron_variant,genic_upstream_transcript_variant                                                  |
| rs1326113892 | intron_variant,genic_upstream_transcript_variant                                                  |
| rs1326180691 | intron_variant,genic_upstream_transcript_variant                                                  |
| rs1326194326 | intron_variant,genic_upstream_transcript_variant                                                  |
| rs1326212416 | intron_variant                                                                                    |
| rs1326225557 | intron_variant,genic_upstream_transcript_variant                                                  |
| rs1326230165 | intron_variant                                                                                    |
| rs1326242186 | intron_variant,genic_downstream_transcript_variant                                                |
| rs1326261152 | intron_variant                                                                                    |
| rs1326314138 | intron_variant                                                                                    |
| rs1326316698 | intron_variant,genic_upstream_transcript_variant                                                  |
| rs1326367979 | 2KB_upstream_variant,intron_variant,upstream_transcript_variant,genic_upstream_transcript_variant |
| rs1326378950 | 2KB_upstream_variant,intron_variant,upstream_transcript_variant,genic_upstream_transcript_variant |
| rs1326397874 | intron_variant,genic_downstream_transcript_variant                                                |
| rs1326427443 | intron_variant,genic_upstream_transcript_variant                                                  |
| rs1326440243 | intron_variant                                                                                    |
| rs1326448636 | intron_variant                                                                                    |
| rs1326482497 | intron_variant                                                                                    |
| rs1326490414 | intron_variant,genic_upstream_transcript_variant                                                  |
| rs1326490421 | intron_variant                                                                                    |
| rs1326506815 | intron_variant,genic_upstream_transcript_variant                                                  |
| rs1326615827 | intron_variant,genic_upstream_transcript_variant                                                  |
| rs1326688135 | intron_variant,genic_downstream_transcript_variant                                                |
| rs1326722551 | intron_variant,genic_upstream_transcript_variant                                                  |
| rs1326727211 | intron_variant                                                                                    |
| rs1326757604 | intron_variant                                                                                    |
| rs1326835730 | intron_variant                                                                                    |
| rs1326883459 | intron_variant                                                                                    |
| rs1326905804 | intron_variant,genic_upstream_transcript_variant                                                  |
| rs1326906719 | intron_variant,genic_upstream_transcript_variant                                                  |
| rs1326918752 | intron_variant                                                                                    |
| rs1326939449 | intron_variant,genic_upstream_transcript_variant                                                  |
| rs1326940730 | intron_variant,genic_upstream_transcript_variant                                                  |
| rs1326972153 | intron_variant,genic_downstream_transcript_variant                                                |
| rs1326985412 | intron_variant                                                                                    |
| rs1326989480 | intron_variant                                                                                    |
| rs1326990929 | intron_variant,genic_upstream_transcript_variant                                                  |
| rs1326998718 | intron_variant,genic_upstream_transcript_variant                                                  |
| rs1327033566 | intron_variant,genic_upstream_transcript_variant                                                  |
| rs1327107416 | intron_variant,genic_downstream_transcript_variant                                                |
| rs1327124995 | intron_variant,genic_upstream_transcript_variant                                                  |
| rs1327137995 | intron_variant,genic_upstream_transcript_variant                                                  |
| rs1327211585 | intron_variant,genic_downstream_transcript_variant                                                |
| rs1327212854 | intron_variant                                                                                    |
| rs1327228661 | intron_variant,genic_downstream_transcript_variant                                                |
| rs1327236305 | intron_variant                                                                                    |
| rs1327307574 | intron_variant                                                                                    |
| rs1327367196 | intron_variant,genic_upstream_transcript_variant                                                  |

|              |                                                                                                                           |
|--------------|---------------------------------------------------------------------------------------------------------------------------|
| rs1327404104 | intron_variant                                                                                                            |
| rs1327408036 | intron_variant                                                                                                            |
| rs1327431626 | intron_variant,genic_upstream_transcript_variant                                                                          |
| rs1327462031 | intron_variant,genic_downstream_transcript_variant                                                                        |
| rs1327479611 | intron_variant,genic_downstream_transcript_variant                                                                        |
| rs1327492198 | splice_acceptor_variant                                                                                                   |
| rs1327497989 | intron_variant                                                                                                            |
| rs1327533649 | intron_variant                                                                                                            |
| rs1327548980 | intron_variant                                                                                                            |
| rs1327552622 | intron_variant,genic_downstream_transcript_variant                                                                        |
| rs1327584450 | intron_variant                                                                                                            |
| rs1327644331 | intron_variant                                                                                                            |
| rs1327718918 | intron_variant                                                                                                            |
| rs1327756937 | intron_variant                                                                                                            |
| rs1327785446 | intron_variant                                                                                                            |
| rs1327796740 | intron_variant,genic_upstream_transcript_variant                                                                          |
| rs1327806663 | intron_variant,genic_upstream_transcript_variant                                                                          |
| rs1327816329 | intron_variant                                                                                                            |
| rs1327851511 | intron_variant,genic_upstream_transcript_variant                                                                          |
| rs1327880753 | intron_variant                                                                                                            |
| rs1327940479 | intron_variant,genic_downstream_transcript_variant                                                                        |
| rs1327946446 | coding_sequence_variant,intron_variant,non_coding_transcript_variant,synonymous_variant,genic_upstream_transcript_variant |
| rs1327962009 | intron_variant                                                                                                            |
| rs1327990004 | intron_variant                                                                                                            |
| rs1328043569 | intron_variant,genic_upstream_transcript_variant                                                                          |
| rs1328048562 | intron_variant                                                                                                            |
| rs1328062272 | intron_variant,genic_upstream_transcript_variant                                                                          |
| rs1328076020 | intron_variant,upstream_transcript_variant,genic_upstream_transcript_variant                                              |
| rs1328104080 | intron_variant,genic_upstream_transcript_variant                                                                          |
| rs1328110342 | coding_sequence_variant,intron_variant,non_coding_transcript_variant,missense_variant,genic_upstream_transcript_variant   |
| rs1328133734 | intron_variant                                                                                                            |
| rs1328177768 | intron_variant                                                                                                            |
| rs1328178605 | intron_variant,genic_upstream_transcript_variant                                                                          |
| rs1328188238 | intron_variant,genic_upstream_transcript_variant                                                                          |
| rs1328202839 | intron_variant,genic_upstream_transcript_variant                                                                          |
| rs1328226625 | intron_variant                                                                                                            |
| rs1328266523 | intron_variant,genic_upstream_transcript_variant                                                                          |
| rs1328270242 | 2KB_upstream_variant,intron_variant,upstream_transcript_variant,genic_upstream_transcript_variant                         |
| rs1328305260 | intron_variant,upstream_transcript_variant,genic_upstream_transcript_variant                                              |
| rs1328365659 | intron_variant                                                                                                            |
| rs1328369786 | intron_variant,genic_downstream_transcript_variant                                                                        |
| rs1328396840 | intron_variant                                                                                                            |
| rs1328482883 | intron_variant                                                                                                            |
| rs1328487624 | intron_variant                                                                                                            |
| rs1328562316 | intron_variant,genic_upstream_transcript_variant                                                                          |
| rs1328583345 | intron_variant                                                                                                            |
| rs1328629675 | intron_variant                                                                                                            |
| rs1328670612 | intron_variant,genic_upstream_transcript_variant                                                                          |
| rs1328687532 | intron_variant,genic_upstream_transcript_variant                                                                          |
| rs1328693429 | intron_variant                                                                                                            |
| rs1328711850 | intron_variant                                                                                                            |
| rs1328738544 | intron_variant                                                                                                            |
| rs1328807237 | 2KB_upstream_variant,intron_variant,upstream_transcript_variant,genic_upstream_transcript_variant                         |
| rs1328836205 | intron_variant                                                                                                            |
| rs1328963556 | intron_variant,genic_upstream_transcript_variant                                                                          |
| rs1328984807 | intron_variant                                                                                                            |
| rs1328992609 | intron_variant                                                                                                            |
| rs1329008493 | intron_variant,genic_upstream_transcript_variant                                                                          |
| rs1329012117 | intron_variant                                                                                                            |
| rs1329045527 | intron_variant                                                                                                            |
| rs1329065140 | intron_variant                                                                                                            |
| rs1329145390 | intron_variant                                                                                                            |
| rs1329161301 | intron_variant,genic_upstream_transcript_variant                                                                          |
| rs1329169055 | intron_variant                                                                                                            |
| rs1329203662 | intron_variant,genic_upstream_transcript_variant                                                                          |
| rs1329246037 | intron_variant                                                                                                            |
| rs1329249195 | intron_variant,genic_upstream_transcript_variant                                                                          |
| rs1329269227 | coding_sequence_variant,intron_variant,non_coding_transcript_variant,missense_variant,genic_upstream_transcript_variant   |
| rs1329270699 | intron_variant,genic_upstream_transcript_variant                                                                          |
| rs1329272976 | intron_variant,genic_downstream_transcript_variant                                                                        |
| rs1329310210 | intron_variant,genic_downstream_transcript_variant                                                                        |
| rs1329331730 | intron_variant,genic_upstream_transcript_variant                                                                          |
| rs1329337431 | intron_variant,genic_downstream_transcript_variant                                                                        |
| rs1329342578 | intron_variant                                                                                                            |

|              |                                                                                                            |
|--------------|------------------------------------------------------------------------------------------------------------|
| rs1329428078 | intron_variant,genic_downstream_transcript_variant                                                         |
| rs1329454199 | intron_variant,genic_downstream_transcript_variant                                                         |
| rs1329455141 | intron_variant                                                                                             |
| rs1329459348 | intron_variant,genic_upstream_transcript_variant                                                           |
| rs1329464737 | intron_variant,genic_upstream_transcript_variant                                                           |
| rs1329468294 | intron_variant,genic_downstream_transcript_variant                                                         |
| rs1329584745 | intron_variant,upstream_transcript_variant,genic_upstream_transcript_variant                               |
| rs1329623383 | intron_variant,genic_downstream_transcript_variant                                                         |
| rs1329705563 | intron_variant,genic_upstream_transcript_variant                                                           |
| rs1329709083 | intron_variant,genic_upstream_transcript_variant                                                           |
| rs1329735263 | intron_variant                                                                                             |
| rs1329741031 | intron_variant,genic_downstream_transcript_variant                                                         |
| rs1329754023 | intron_variant                                                                                             |
| rs1329754951 | missense_variant,non_coding_transcript_variant,coding_sequence_variant                                     |
| rs1329809230 | downstream_transcript_variant,intron_variant,genic_downstream_transcript_variant                           |
| rs1329812885 | intron_variant,genic_upstream_transcript_variant                                                           |
| rs1329825598 | intron_variant                                                                                             |
| rs1329833092 | intron_variant,genic_downstream_transcript_variant                                                         |
| rs1329839811 | intron_variant                                                                                             |
| rs1329862044 | intron_variant,genic_downstream_transcript_variant                                                         |
| rs1329886933 | missense_variant,non_coding_transcript_variant,coding_sequence_variant,synonymous_variant                  |
| rs1329907432 | intron_variant,genic_downstream_transcript_variant                                                         |
| rs1329909009 | intron_variant,genic_upstream_transcript_variant                                                           |
| rs1329947981 | 2KB_upstream_variant,intron_variant,upstream_transcript_variant,genic_upstream_transcript_variant          |
| rs1329990605 | intron_variant                                                                                             |
| rs1330062336 | intron_variant,genic_downstream_transcript_variant                                                         |
| rs1330072532 | intron_variant,genic_upstream_transcript_variant                                                           |
| rs1330125175 | intron_variant                                                                                             |
| rs1330140020 | intron_variant                                                                                             |
| rs1330187995 | intron_variant,genic_upstream_transcript_variant                                                           |
| rs1330198104 | intron_variant,genic_upstream_transcript_variant                                                           |
| rs1330230732 | intron_variant,genic_upstream_transcript_variant                                                           |
| rs1330269617 | intron_variant                                                                                             |
| rs1330331613 | intron_variant                                                                                             |
| rs1330356892 | intron_variant                                                                                             |
| rs1330361986 | intron_variant                                                                                             |
| rs1330382403 | intron_variant,genic_upstream_transcript_variant                                                           |
| rs1330388336 | intron_variant,genic_upstream_transcript_variant                                                           |
| rs1330412416 | intron_variant,genic_upstream_transcript_variant                                                           |
| rs1330421176 | intron_variant,genic_upstream_transcript_variant                                                           |
| rs1330456407 | intron_variant                                                                                             |
| rs1330530750 | intron_variant                                                                                             |
| rs1330537117 | non_coding_transcript_variant,coding_sequence_variant,synonymous_variant                                   |
| rs1330538771 | intron_variant,genic_downstream_transcript_variant                                                         |
| rs1330565170 | intron_variant                                                                                             |
| rs1330566980 | missense_variant,genic_downstream_transcript_variant,non_coding_transcript_variant,coding_sequence_variant |
| rs1330586121 | intron_variant,genic_upstream_transcript_variant                                                           |
| rs1330604825 | intron_variant,genic_downstream_transcript_variant                                                         |
| rs1330604948 | intron_variant                                                                                             |
| rs1330605624 | intron_variant,genic_upstream_transcript_variant                                                           |
| rs1330646563 | intron_variant,genic_upstream_transcript_variant                                                           |
| rs1330648228 | missense_variant,non_coding_transcript_variant,coding_sequence_variant                                     |
| rs1330675420 | intron_variant,genic_upstream_transcript_variant                                                           |
| rs1330737886 | intron_variant                                                                                             |
| rs1330738577 | intron_variant,genic_upstream_transcript_variant                                                           |
| rs1330820652 | intron_variant                                                                                             |
| rs1330841060 | intron_variant,genic_upstream_transcript_variant                                                           |
| rs1330852166 | 2KB_upstream_variant,intron_variant,upstream_transcript_variant,genic_upstream_transcript_variant          |
| rs1330870101 | intron_variant,genic_upstream_transcript_variant                                                           |
| rs1330883296 | intron_variant,genic_upstream_transcript_variant                                                           |
| rs1330893335 | intron_variant,upstream_transcript_variant,genic_upstream_transcript_variant                               |
| rs1330905122 | intron_variant                                                                                             |
| rs1330906260 | intron_variant,genic_downstream_transcript_variant                                                         |
| rs1330916042 | intron_variant                                                                                             |
| rs1330922830 | intron_variant,genic_downstream_transcript_variant                                                         |
| rs1330983822 | intron_variant,upstream_transcript_variant,genic_upstream_transcript_variant                               |
| rs1331010047 | intron_variant                                                                                             |
| rs1331054382 | intron_variant                                                                                             |
| rs1331075578 | downstream_transcript_variant,500B_downstream_variant                                                      |
| rs1331149506 | intron_variant,genic_downstream_transcript_variant                                                         |
| rs1331150318 | intron_variant,genic_upstream_transcript_variant                                                           |
| rs1331159520 | intron_variant,genic_downstream_transcript_variant                                                         |
| rs1331184024 | intron_variant,genic_upstream_transcript_variant                                                           |
| rs1331223041 | intron_variant,genic_upstream_transcript_variant                                                           |

|              |                                                                                                              |
|--------------|--------------------------------------------------------------------------------------------------------------|
| rs1331307137 | intron_variant,genic_upstream_transcript_variant                                                             |
| rs1331345039 | intron_variant,genic_upstream_transcript_variant                                                             |
| rs1331357889 | 2KB_upstream_variant,intron_variant,upstream_transcript_variant,genic_upstream_transcript_variant            |
| rs1331381396 | intron_variant                                                                                               |
| rs1331381634 | intron_variant                                                                                               |
| rs1331396936 | intron_variant,genic_upstream_transcript_variant                                                             |
| rs1331410213 | intron_variant,genic_upstream_transcript_variant                                                             |
| rs1331441848 | 3_prime_UTR_variant,genic_downstream_transcript_variant,non_coding_transcript_variant                        |
| rs1331442207 | intron_variant                                                                                               |
| rs1331449833 | intron_variant,genic_upstream_transcript_variant                                                             |
| rs1331473056 | intron_variant,genic_downstream_transcript_variant                                                           |
| rs1331515187 | intron_variant,genic_downstream_transcript_variant                                                           |
| rs1331516834 | intron_variant,genic_upstream_transcript_variant                                                             |
| rs1331521895 | intron_variant                                                                                               |
| rs1331534280 | intron_variant,genic_upstream_transcript_variant                                                             |
| rs1331541903 | intron_variant,genic_upstream_transcript_variant                                                             |
| rs1331610298 | intron_variant                                                                                               |
| rs1331631723 | intron_variant,genic_upstream_transcript_variant                                                             |
| rs1331639031 | intron_variant,upstream_transcript_variant,genic_upstream_transcript_variant                                 |
| rs1331657499 | intron_variant                                                                                               |
| rs1331713647 | intron_variant,genic_upstream_transcript_variant                                                             |
| rs1331718048 | intron_variant                                                                                               |
| rs1331724479 | intron_variant,genic_upstream_transcript_variant                                                             |
| rs1331747904 | intron_variant,genic_upstream_transcript_variant                                                             |
| rs1331762345 | intron_variant,genic_upstream_transcript_variant                                                             |
| rs1331767631 | intron_variant,genic_downstream_transcript_variant                                                           |
| rs1331775128 | intron_variant,upstream_transcript_variant,genic_upstream_transcript_variant                                 |
| rs1331788631 | intron_variant                                                                                               |
| rs1331819889 | intron_variant,genic_upstream_transcript_variant                                                             |
| rs1331903155 | intron_variant,genic_downstream_transcript_variant                                                           |
| rs1331924184 | intron_variant,genic_upstream_transcript_variant                                                             |
| rs1331945062 | intron_variant,genic_downstream_transcript_variant                                                           |
| rs1332004880 | intron_variant,genic_upstream_transcript_variant                                                             |
| rs1332005755 | intron_variant,genic_upstream_transcript_variant                                                             |
| rs1332049203 | genic_downstream_transcript_variant,non_coding_transcript_variant,coding_sequence_variant,synonymous_variant |
| rs1332067642 | intron_variant                                                                                               |
| rs1332129021 | intron_variant,genic_upstream_transcript_variant                                                             |
| rs1332182169 | intron_variant,genic_upstream_transcript_variant                                                             |
| rs1332205384 | intron_variant,genic_upstream_transcript_variant                                                             |
| rs1332209545 | intron_variant,genic_upstream_transcript_variant                                                             |
| rs1332226306 | intron_variant,genic_downstream_transcript_variant                                                           |
| rs1332254769 | intron_variant,genic_downstream_transcript_variant                                                           |
| rs1332264691 | 2KB_upstream_variant,intron_variant,upstream_transcript_variant,genic_upstream_transcript_variant            |
| rs1332295534 | intron_variant,genic_upstream_transcript_variant                                                             |
| rs1332322470 | intron_variant,genic_upstream_transcript_variant                                                             |
| rs1332335317 | intron_variant,genic_upstream_transcript_variant                                                             |
| rs1332371053 | intron_variant                                                                                               |
| rs1332440164 | intron_variant,genic_upstream_transcript_variant                                                             |
| rs1332461919 | intron_variant,genic_upstream_transcript_variant                                                             |
| rs1332466514 | intron_variant                                                                                               |
| rs1332469617 | intron_variant,5_prime_UTR_variant                                                                           |
| rs1332512223 | intron_variant,genic_downstream_transcript_variant                                                           |
| rs1332528920 | intron_variant                                                                                               |
| rs1332538895 | intron_variant,genic_upstream_transcript_variant                                                             |
| rs1332542620 | intron_variant,genic_downstream_transcript_variant                                                           |
| rs1332549572 | intron_variant                                                                                               |
| rs1332559833 | intron_variant,genic_downstream_transcript_variant                                                           |
| rs1332608617 | intron_variant,genic_upstream_transcript_variant                                                             |
| rs1332611671 | intron_variant                                                                                               |
| rs1332625147 | intron_variant,genic_upstream_transcript_variant                                                             |
| rs1332657678 | intron_variant,genic_upstream_transcript_variant                                                             |
| rs1332661739 | intron_variant,genic_downstream_transcript_variant                                                           |
| rs1332681477 | intron_variant                                                                                               |
| rs1332714152 | intron_variant,genic_upstream_transcript_variant                                                             |
| rs1332751242 | intron_variant,genic_upstream_transcript_variant                                                             |
| rs1332855371 | intron_variant,genic_upstream_transcript_variant                                                             |
| rs1332864923 | intron_variant,genic_downstream_transcript_variant                                                           |
| rs1332866600 | intron_variant                                                                                               |
| rs1332904083 | intron_variant,genic_downstream_transcript_variant                                                           |
| rs1332913528 | intron_variant,genic_upstream_transcript_variant                                                             |
| rs1332923354 | intron_variant,genic_downstream_transcript_variant                                                           |
| rs1332938160 | intron_variant                                                                                               |
| rs1332966461 | intron_variant,genic_downstream_transcript_variant                                                           |
| rs1333052320 | intron_variant                                                                                               |

|              |                                                                                                   |
|--------------|---------------------------------------------------------------------------------------------------|
| rs1333074057 | intron_variant,genic_downstream_transcript_variant                                                |
| rs1333075112 | intron_variant,genic_upstream_transcript_variant                                                  |
| rs1333125207 | 2KB_upstream_variant,intron_variant,upstream_transcript_variant,genic_upstream_transcript_variant |
| rs1333130780 | intron_variant,genic_downstream_transcript_variant                                                |
| rs1333133391 | intron_variant                                                                                    |
| rs1333171640 | intron_variant                                                                                    |
| rs1333179468 | 2KB_upstream_variant,intron_variant,upstream_transcript_variant,genic_upstream_transcript_variant |
| rs1333186598 | intron_variant,genic_upstream_transcript_variant                                                  |
| rs1333192203 | intron_variant,genic_upstream_transcript_variant                                                  |
| rs1333196976 | downstream_transcript_variant,500B_downstream_variant                                             |
| rs1333198689 | intron_variant,upstream_transcript_variant,genic_upstream_transcript_variant                      |
| rs1333220649 | intron_variant,genic_downstream_transcript_variant                                                |
| rs1333303237 | intron_variant                                                                                    |
| rs1333347470 | intron_variant                                                                                    |
| rs1333372034 | 2KB_upstream_variant,intron_variant,upstream_transcript_variant,genic_upstream_transcript_variant |
| rs1333446970 | intron_variant,genic_upstream_transcript_variant                                                  |
| rs1333491821 | intron_variant,genic_downstream_transcript_variant                                                |
| rs1333501976 | intron_variant,genic_upstream_transcript_variant                                                  |
| rs1333556847 | intron_variant                                                                                    |
| rs1333565307 | intron_variant,upstream_transcript_variant,genic_upstream_transcript_variant                      |
| rs1333579078 | intron_variant,genic_upstream_transcript_variant                                                  |
| rs1333592944 | intron_variant                                                                                    |
| rs1333602835 | intron_variant                                                                                    |
| rs1333636235 | intron_variant,genic_upstream_transcript_variant                                                  |
| rs1333674220 | intron_variant,genic_upstream_transcript_variant                                                  |
| rs1333700242 | intron_variant                                                                                    |
| rs1333731030 | intron_variant,genic_upstream_transcript_variant                                                  |
| rs1333742949 | intron_variant,genic_downstream_transcript_variant                                                |
| rs1333788480 | intron_variant                                                                                    |
| rs1333788633 | intron_variant,genic_downstream_transcript_variant                                                |
| rs1333882720 | intron_variant,genic_upstream_transcript_variant                                                  |
| rs1333887574 | intron_variant                                                                                    |
| rs1333908313 | genic_downstream_transcript_variant,intron_variant                                                |
| rs1333926072 | intron_variant                                                                                    |
| rs1333967976 | genic_downstream_transcript_variant,intron_variant                                                |
| rs1334005270 | intron_variant,genic_upstream_transcript_variant                                                  |
| rs1334031738 | intron_variant,genic_upstream_transcript_variant                                                  |
| rs1334042408 | intron_variant                                                                                    |
| rs1334096043 | intron_variant,genic_upstream_transcript_variant                                                  |
| rs1334105614 | intron_variant                                                                                    |
| rs1334111816 | intron_variant                                                                                    |
| rs1334173817 | intron_variant                                                                                    |
| rs1334178056 | intron_variant,genic_upstream_transcript_variant                                                  |
| rs1334216052 | intron_variant,genic_upstream_transcript_variant                                                  |
| rs1334218300 | intron_variant                                                                                    |
| rs1334221824 | intron_variant                                                                                    |
| rs1334283549 | genic_downstream_transcript_variant,intron_variant                                                |
| rs1334302251 | intron_variant,genic_upstream_transcript_variant                                                  |
| rs1334318956 | intron_variant,genic_upstream_transcript_variant                                                  |
| rs1334373241 | intron_variant,genic_upstream_transcript_variant                                                  |
| rs1334391118 | intron_variant                                                                                    |
| rs1334394662 | intron_variant,genic_upstream_transcript_variant                                                  |
| rs1334398721 | genic_downstream_transcript_variant,intron_variant                                                |
| rs1334473920 | genic_downstream_transcript_variant,intron_variant                                                |
| rs1334504424 | non_coding_transcript_variant,3_prime_UTR_variant,genic_downstream_transcript_variant             |
| rs1334512628 | intron_variant,genic_upstream_transcript_variant                                                  |
| rs1334515278 | intron_variant,upstream_transcript_variant,genic_upstream_transcript_variant                      |
| rs1334578917 | non_coding_transcript_variant,3_prime_UTR_variant,genic_downstream_transcript_variant             |
| rs1334586292 | intron_variant                                                                                    |
| rs1334589198 | intron_variant                                                                                    |
| rs1334605114 | intron_variant,genic_upstream_transcript_variant                                                  |
| rs1334637956 | intron_variant                                                                                    |
| rs1334654331 | intron_variant                                                                                    |
| rs1334660522 | intron_variant,genic_upstream_transcript_variant                                                  |
| rs1334665947 | genic_downstream_transcript_variant,intron_variant                                                |
| rs1334668737 | genic_upstream_transcript_variant,intron_variant,upstream_transcript_variant,2KB_upstream_variant |
| rs1334685859 | intron_variant,genic_upstream_transcript_variant                                                  |
| rs1334687964 | intron_variant                                                                                    |
| rs1334766793 | intron_variant                                                                                    |
| rs1334774166 | intron_variant,genic_upstream_transcript_variant                                                  |
| rs1334802639 | intron_variant,genic_upstream_transcript_variant                                                  |
| rs1334820552 | genic_downstream_transcript_variant,intron_variant                                                |
| rs1334824833 | intron_variant,genic_upstream_transcript_variant                                                  |
| rs1334843137 | intron_variant                                                                                    |

|              |                                                                                       |
|--------------|---------------------------------------------------------------------------------------|
| rs1334911583 | intron_variant,genic_upstream_transcript_variant                                      |
| rs1335055945 | intron_variant                                                                        |
| rs1335059449 | genic_downstream_transcript_variant,intron_variant                                    |
| rs1335128622 | genic_downstream_transcript_variant,intron_variant                                    |
| rs1335148121 | genic_downstream_transcript_variant,intron_variant                                    |
| rs1335160840 | intron_variant,genic_upstream_transcript_variant                                      |
| rs1335265318 | intron_variant                                                                        |
| rs1335265522 | intron_variant                                                                        |
| rs1335285177 | intron_variant,genic_upstream_transcript_variant                                      |
| rs1335293676 | genic_downstream_transcript_variant,intron_variant                                    |
| rs1335325125 | intron_variant,upstream_transcript_variant,genic_upstream_transcript_variant          |
| rs1335326423 | intron_variant,genic_upstream_transcript_variant                                      |
| rs1335406924 | intron_variant,genic_upstream_transcript_variant                                      |
| rs1335435278 | non_coding_transcript_variant,3_prime_UTR_variant,genic_downstream_transcript_variant |
| rs1335458513 | genic_downstream_transcript_variant,intron_variant                                    |
| rs1335465711 | intron_variant,genic_upstream_transcript_variant                                      |
| rs1335479498 | genic_downstream_transcript_variant,intron_variant                                    |
| rs1335489909 | genic_downstream_transcript_variant,intron_variant                                    |
| rs1335535004 | intron_variant                                                                        |
| rs1335583090 | intron_variant,genic_upstream_transcript_variant                                      |
| rs1335587346 | intron_variant                                                                        |
| rs1335600340 | genic_downstream_transcript_variant,intron_variant                                    |
| rs1335627507 | genic_downstream_transcript_variant,intron_variant                                    |
| rs1335687644 | intron_variant,upstream_transcript_variant,genic_upstream_transcript_variant          |
| rs1335715095 | genic_downstream_transcript_variant,intron_variant                                    |
| rs1335762575 | genic_downstream_transcript_variant,intron_variant                                    |
| rs1335781404 | intron_variant,genic_upstream_transcript_variant                                      |
| rs1335785982 | intron_variant                                                                        |
| rs1335813441 | intron_variant                                                                        |
| rs1335891240 | genic_downstream_transcript_variant,intron_variant                                    |
| rs1335895455 | intron_variant,genic_upstream_transcript_variant                                      |
| rs1335909469 | intron_variant,genic_upstream_transcript_variant                                      |
| rs1335962325 | intron_variant                                                                        |
| rs1336000420 | intron_variant                                                                        |
| rs1336021644 | intron_variant,genic_upstream_transcript_variant                                      |
| rs1336050894 | intron_variant                                                                        |
| rs1336081345 | genic_downstream_transcript_variant,intron_variant                                    |
| rs1336103802 | intron_variant,genic_upstream_transcript_variant                                      |
| rs1336145038 | intron_variant                                                                        |
| rs1336162289 | intron_variant,genic_upstream_transcript_variant                                      |
| rs1336169119 | intron_variant                                                                        |
| rs1336185650 | intron_variant,genic_upstream_transcript_variant                                      |
| rs1336189515 | intron_variant,genic_upstream_transcript_variant                                      |
| rs1336252627 | intron_variant                                                                        |
| rs1336254364 | intron_variant                                                                        |
| rs1336309126 | intron_variant                                                                        |
| rs1336329666 | genic_downstream_transcript_variant,intron_variant                                    |
| rs1336369496 | intron_variant,genic_upstream_transcript_variant                                      |
| rs1336422435 | genic_downstream_transcript_variant,intron_variant                                    |
| rs1336436142 | intron_variant,genic_upstream_transcript_variant                                      |
| rs1336444482 | non_coding_transcript_variant,3_prime_UTR_variant,genic_downstream_transcript_variant |
| rs1336448873 | intron_variant                                                                        |
| rs1336567107 | intron_variant                                                                        |
| rs1336627749 | intron_variant                                                                        |
| rs1336652491 | intron_variant,genic_upstream_transcript_variant                                      |
| rs1336695801 | intron_variant                                                                        |
| rs1336719624 | intron_variant,genic_upstream_transcript_variant                                      |
| rs1336723120 | intron_variant                                                                        |
| rs1336733236 | genic_downstream_transcript_variant,intron_variant                                    |
| rs1336739355 | intron_variant,upstream_transcript_variant,genic_upstream_transcript_variant          |
| rs1336744786 | intron_variant                                                                        |
| rs1336752197 | genic_downstream_transcript_variant,intron_variant                                    |
| rs1336774980 | intron_variant                                                                        |
| rs1336788497 | genic_downstream_transcript_variant,intron_variant                                    |
| rs1336792208 | intron_variant                                                                        |
| rs1336844061 | genic_downstream_transcript_variant,intron_variant                                    |
| rs1336904826 | intron_variant                                                                        |
| rs1336906568 | genic_downstream_transcript_variant,intron_variant                                    |
| rs1336956622 | intron_variant,genic_upstream_transcript_variant                                      |
| rs1337012787 | intron_variant                                                                        |
| rs1337042061 | intron_variant,genic_upstream_transcript_variant                                      |
| rs1337089814 | intron_variant,genic_upstream_transcript_variant                                      |
| rs1337114602 | intron_variant,genic_upstream_transcript_variant                                      |
| rs1337148236 | intron_variant                                                                        |

|              |                                                                                                   |
|--------------|---------------------------------------------------------------------------------------------------|
| rs1337161917 | intron_variant                                                                                    |
| rs1337171565 | intron_variant,genic_upstream_transcript_variant                                                  |
| rs1337191257 | intron_variant,genic_upstream_transcript_variant                                                  |
| rs1337200258 | 2KB_upstream_variant,intron_variant,upstream_transcript_variant,genic_upstream_transcript_variant |
| rs1337216785 | 2KB_upstream_variant,intron_variant,upstream_transcript_variant,genic_upstream_transcript_variant |
| rs1337246792 | intron_variant                                                                                    |
| rs1337299680 | intron_variant,genic_upstream_transcript_variant                                                  |
| rs1337329589 | intron_variant,genic_upstream_transcript_variant                                                  |
| rs1337357109 | intron_variant,genic_upstream_transcript_variant                                                  |
| rs1337375831 | genic_downstream_transcript_variant,intron_variant                                                |
| rs1337400253 | intron_variant,genic_upstream_transcript_variant                                                  |
| rs1337403980 | genic_downstream_transcript_variant,intron_variant                                                |
| rs1337458094 | intron_variant                                                                                    |
| rs1337559243 | intron_variant,genic_upstream_transcript_variant                                                  |
| rs1337643347 | genic_downstream_transcript_variant,intron_variant                                                |
| rs1337664635 | intron_variant,genic_upstream_transcript_variant                                                  |
| rs1337673781 | intron_variant                                                                                    |
| rs1337679365 | intron_variant                                                                                    |
| rs1337704130 | genic_downstream_transcript_variant,intron_variant                                                |
| rs1337704667 | genic_downstream_transcript_variant,intron_variant                                                |
| rs1337720615 | intron_variant,genic_upstream_transcript_variant                                                  |
| rs1337735122 | intron_variant,genic_upstream_transcript_variant                                                  |
| rs1337772896 | intron_variant,genic_upstream_transcript_variant                                                  |
| rs1337780484 | genic_upstream_transcript_variant,intron_variant,upstream_transcript_variant,2KB_upstream_variant |
| rs1337791530 | intron_variant,genic_upstream_transcript_variant                                                  |
| rs1337846579 | intron_variant,genic_upstream_transcript_variant                                                  |
| rs1337901970 | genic_upstream_transcript_variant,intron_variant,upstream_transcript_variant,2KB_upstream_variant |
| rs1337933606 | genic_downstream_transcript_variant,intron_variant                                                |
| rs1337943565 | intron_variant                                                                                    |
| rs1337947187 | intron_variant,genic_upstream_transcript_variant                                                  |
| rs1337979787 | intron_variant                                                                                    |
| rs1337981924 | intron_variant,genic_upstream_transcript_variant                                                  |
| rs1337999042 | intron_variant                                                                                    |
| rs1338007523 | intron_variant                                                                                    |
| rs1338026569 | upstream_transcript_variant,intron_variant,5_prime_UTR_variant,genic_upstream_transcript_variant  |
| rs1338036886 | intron_variant,genic_upstream_transcript_variant                                                  |
| rs1338062630 | intron_variant,genic_upstream_transcript_variant                                                  |
| rs1338081416 | intron_variant,genic_upstream_transcript_variant                                                  |
| rs1338086616 | intron_variant,genic_upstream_transcript_variant                                                  |
| rs1338104840 | intron_variant                                                                                    |
| rs1338123803 | genic_downstream_transcript_variant,intron_variant                                                |
| rs1338136655 | intron_variant                                                                                    |
| rs1338171336 | intron_variant                                                                                    |
| rs1338193883 | non_coding_transcript_variant,3_prime_UTR_variant,genic_downstream_transcript_variant             |
| rs1338210486 | genic_downstream_transcript_variant,intron_variant                                                |
| rs1338236595 | intron_variant,genic_upstream_transcript_variant                                                  |
| rs1338247576 | genic_downstream_transcript_variant,intron_variant                                                |
| rs1338278307 | intron_variant,genic_upstream_transcript_variant                                                  |
| rs1338321338 | intron_variant,upstream_transcript_variant,genic_upstream_transcript_variant                      |
| rs1338333346 | intron_variant                                                                                    |
| rs1338341659 | intron_variant,genic_upstream_transcript_variant                                                  |
| rs1338346162 | intron_variant                                                                                    |
| rs1338353503 | intron_variant                                                                                    |
| rs1338363631 | intron_variant                                                                                    |
| rs1338364898 | intron_variant                                                                                    |
| rs1338398772 | intron_variant,genic_upstream_transcript_variant                                                  |
| rs1338438743 | intron_variant                                                                                    |
| rs1338449474 | intron_variant                                                                                    |
| rs1338454862 | genic_downstream_transcript_variant,intron_variant                                                |
| rs1338455902 | downstream_transcript_variant,genic_downstream_transcript_variant,intron_variant                  |
| rs1338476724 | intron_variant                                                                                    |
| rs1338487585 | genic_downstream_transcript_variant,intron_variant                                                |
| rs1338494451 | genic_downstream_transcript_variant,intron_variant                                                |
| rs1338526059 | intron_variant                                                                                    |
| rs1338551931 | intron_variant                                                                                    |
| rs1338601605 | 2KB_upstream_variant,intron_variant,upstream_transcript_variant,genic_upstream_transcript_variant |
| rs1338625159 | 2KB_upstream_variant,intron_variant,upstream_transcript_variant,genic_upstream_transcript_variant |
| rs1338635676 | intron_variant                                                                                    |
| rs1338670172 | genic_downstream_transcript_variant,intron_variant                                                |
| rs1338717969 | intron_variant,genic_upstream_transcript_variant                                                  |
| rs1338718160 | intron_variant                                                                                    |
| rs1338737794 | genic_downstream_transcript_variant,intron_variant                                                |
| rs1338758996 | intron_variant,genic_upstream_transcript_variant                                                  |
| rs1338775108 | intron_variant                                                                                    |

|              |                                                                                                   |
|--------------|---------------------------------------------------------------------------------------------------|
| rs1338780448 | genic_downstream_transcript_variant,intron_variant                                                |
| rs1338801347 | genic_downstream_transcript_variant,intron_variant                                                |
| rs1338807065 | intron_variant                                                                                    |
| rs1338860471 | intron_variant,genic_upstream_transcript_variant                                                  |
| rs1338864751 | intron_variant                                                                                    |
| rs1338912107 | intron_variant                                                                                    |
| rs1338941729 | intron_variant,genic_upstream_transcript_variant                                                  |
| rs1338977990 | intron_variant,genic_upstream_transcript_variant                                                  |
| rs1338990448 | intron_variant,genic_upstream_transcript_variant                                                  |
| rs1338995167 | intron_variant                                                                                    |
| rs1338997667 | intron_variant                                                                                    |
| rs1339042090 | intron_variant,upstream_transcript_variant,genic_upstream_transcript_variant                      |
| rs1339050243 | intron_variant                                                                                    |
| rs1339077062 | genic_downstream_transcript_variant,intron_variant                                                |
| rs1339119523 | intron_variant                                                                                    |
| rs1339122014 | intron_variant                                                                                    |
| rs1339160368 | intron_variant,upstream_transcript_variant,genic_upstream_transcript_variant                      |
| rs1339176911 | genic_downstream_transcript_variant,intron_variant                                                |
| rs1339198054 | intron_variant                                                                                    |
| rs1339256078 | intron_variant                                                                                    |
| rs1339260212 | intron_variant                                                                                    |
| rs1339282614 | intron_variant                                                                                    |
| rs1339295749 | intron_variant,genic_upstream_transcript_variant                                                  |
| rs1339307877 | intron_variant                                                                                    |
| rs1339324747 | intron_variant                                                                                    |
| rs1339335868 | intron_variant,genic_upstream_transcript_variant                                                  |
| rs1339337936 | intron_variant                                                                                    |
| rs1339376504 | intron_variant                                                                                    |
| rs1339398823 | intron_variant,genic_upstream_transcript_variant                                                  |
| rs1339431244 | intron_variant,genic_upstream_transcript_variant                                                  |
| rs1339437070 | intron_variant                                                                                    |
| rs1339451128 | intron_variant,genic_upstream_transcript_variant                                                  |
| rs1339454028 | intron_variant,genic_upstream_transcript_variant                                                  |
| rs1339494768 | intron_variant                                                                                    |
| rs1339518012 | genic_downstream_transcript_variant,intron_variant                                                |
| rs1339523180 | genic_downstream_transcript_variant,intron_variant                                                |
| rs1339526225 | intron_variant,genic_upstream_transcript_variant                                                  |
| rs1339532638 | intron_variant,genic_upstream_transcript_variant                                                  |
| rs1339542490 | intron_variant                                                                                    |
| rs1339576742 | genic_downstream_transcript_variant,intron_variant                                                |
| rs1339577807 | intron_variant                                                                                    |
| rs1339639385 | intron_variant,genic_upstream_transcript_variant                                                  |
| rs1339639703 | genic_downstream_transcript_variant,intron_variant                                                |
| rs1339645147 | genic_downstream_transcript_variant,intron_variant                                                |
| rs1339658904 | intron_variant,genic_upstream_transcript_variant                                                  |
| rs1339678565 | intron_variant                                                                                    |
| rs1339694523 | intron_variant,genic_upstream_transcript_variant                                                  |
| rs1339714248 | genic_downstream_transcript_variant,intron_variant                                                |
| rs1339743887 | intron_variant                                                                                    |
| rs1339765906 | intron_variant,upstream_transcript_variant,genic_upstream_transcript_variant                      |
| rs1339784162 | intron_variant                                                                                    |
| rs1339806853 | intron_variant,genic_upstream_transcript_variant                                                  |
| rs1339819232 | intron_variant                                                                                    |
| rs1339840999 | intron_variant,genic_upstream_transcript_variant                                                  |
| rs1339880410 | genic_upstream_transcript_variant,intron_variant,upstream_transcript_variant,2KB_upstream_variant |
| rs1339883122 | intron_variant,genic_upstream_transcript_variant                                                  |
| rs1339884859 | genic_downstream_transcript_variant,intron_variant                                                |
| rs1339895615 | intron_variant,genic_upstream_transcript_variant                                                  |
| rs1339963831 | intron_variant,genic_upstream_transcript_variant                                                  |
| rs1339987740 | intron_variant,genic_upstream_transcript_variant                                                  |
| rs1339998364 | intron_variant,genic_upstream_transcript_variant                                                  |
| rs1340011745 | intron_variant,genic_upstream_transcript_variant                                                  |
| rs1340015462 | intron_variant,genic_upstream_transcript_variant                                                  |
| rs1340017497 | intron_variant                                                                                    |
| rs1340023680 | intron_variant,genic_upstream_transcript_variant                                                  |
| rs1340033870 | 2KB_upstream_variant,intron_variant,upstream_transcript_variant,genic_upstream_transcript_variant |
| rs1340103393 | genic_downstream_transcript_variant,intron_variant                                                |
| rs1340133585 | genic_downstream_transcript_variant,intron_variant                                                |
| rs1340143336 | intron_variant,genic_upstream_transcript_variant                                                  |
| rs1340253277 | intron_variant                                                                                    |
| rs1340272586 | intron_variant,genic_upstream_transcript_variant                                                  |
| rs1340309726 | intron_variant                                                                                    |
| rs1340353892 | intron_variant                                                                                    |
| rs1340355638 | genic_downstream_transcript_variant,intron_variant                                                |

|              |                                                                                                                           |
|--------------|---------------------------------------------------------------------------------------------------------------------------|
| rs1340360044 | intron_variant,genic_upstream_transcript_variant                                                                          |
| rs1340391174 | intron_variant,genic_upstream_transcript_variant                                                                          |
| rs1340395461 | 500B_downstream_variant,downstream_transcript_variant                                                                     |
| rs1340400978 | genic_downstream_transcript_variant,intron_variant                                                                        |
| rs1340416297 | intron_variant                                                                                                            |
| rs1340431060 | intron_variant,genic_upstream_transcript_variant                                                                          |
| rs1340437049 | intron_variant,genic_upstream_transcript_variant                                                                          |
| rs1340483700 | genic_downstream_transcript_variant,intron_variant                                                                        |
| rs1340598485 | intron_variant                                                                                                            |
| rs1340606631 | intron_variant,upstream_transcript_variant,genic_upstream_transcript_variant                                              |
| rs1340633472 | intron_variant                                                                                                            |
| rs1340639067 | intron_variant                                                                                                            |
| rs1340643010 | intron_variant,genic_upstream_transcript_variant                                                                          |
| rs1340647558 | intron_variant,genic_upstream_transcript_variant                                                                          |
| rs1340678133 | intron_variant                                                                                                            |
| rs1340719967 | intron_variant                                                                                                            |
| rs1340727607 | intron_variant                                                                                                            |
| rs1340829345 | intron_variant,genic_upstream_transcript_variant                                                                          |
| rs1340843346 | intron_variant,genic_upstream_transcript_variant                                                                          |
| rs1340861449 | 2KB_upstream_variant,intron_variant,upstream_transcript_variant,genic_upstream_transcript_variant                         |
| rs1340885531 | intron_variant,genic_upstream_transcript_variant                                                                          |
| rs1340912420 | intron_variant                                                                                                            |
| rs1340956559 | genic_downstream_transcript_variant,intron_variant                                                                        |
| rs1340998104 | intron_variant                                                                                                            |
| rs1341010618 | genic_upstream_transcript_variant,intron_variant,upstream_transcript_variant,2KB_upstream_variant                         |
| rs1341057509 | non_coding_transcript_variant,3_prime_UTR_variant,genic_downstream_transcript_variant                                     |
| rs1341057555 | intron_variant,genic_upstream_transcript_variant                                                                          |
| rs1341075076 | genic_upstream_transcript_variant,intron_variant,upstream_transcript_variant,2KB_upstream_variant                         |
| rs1341097476 | intron_variant                                                                                                            |
| rs1341109555 | intron_variant                                                                                                            |
| rs1341125882 | intron_variant                                                                                                            |
| rs1341131498 | intron_variant                                                                                                            |
| rs1341144290 | intron_variant,genic_upstream_transcript_variant                                                                          |
| rs1341180148 | intron_variant                                                                                                            |
| rs1341186535 | intron_variant,genic_upstream_transcript_variant                                                                          |
| rs1341234379 | intron_variant                                                                                                            |
| rs1341241469 | intron_variant                                                                                                            |
| rs1341294888 | genic_downstream_transcript_variant,intron_variant                                                                        |
| rs1341295607 | intron_variant                                                                                                            |
| rs1341305791 | intron_variant,genic_upstream_transcript_variant                                                                          |
| rs1341306746 | intron_variant,genic_upstream_transcript_variant                                                                          |
| rs1341327488 | intron_variant                                                                                                            |
| rs1341334839 | intron_variant                                                                                                            |
| rs1341353915 | intron_variant,upstream_transcript_variant,genic_upstream_transcript_variant                                              |
| rs1341391355 | genic_downstream_transcript_variant,intron_variant                                                                        |
| rs1341405465 | intron_variant                                                                                                            |
| rs1341414146 | genic_downstream_transcript_variant,intron_variant                                                                        |
| rs1341442063 | intron_variant                                                                                                            |
| rs1341453381 | intron_variant,genic_upstream_transcript_variant                                                                          |
| rs1341464366 | intron_variant,genic_upstream_transcript_variant                                                                          |
| rs1341501832 | intron_variant                                                                                                            |
| rs1341528088 | intron_variant,upstream_transcript_variant,genic_upstream_transcript_variant                                              |
| rs1341536807 | 2KB_upstream_variant,intron_variant,upstream_transcript_variant,genic_upstream_transcript_variant                         |
| rs1341606363 | intron_variant                                                                                                            |
| rs1341623403 | intron_variant,genic_upstream_transcript_variant                                                                          |
| rs1341699599 | intron_variant,5_prime_UTR_variant                                                                                        |
| rs1341722094 | genic_downstream_transcript_variant,intron_variant                                                                        |
| rs1341728679 | non_coding_transcript_variant,intron_variant,coding_sequence_variant,synonymous_variant,genic_upstream_transcript_variant |
| rs1341735923 | genic_downstream_transcript_variant,intron_variant                                                                        |
| rs1341746030 | intron_variant                                                                                                            |
| rs1341752714 | intron_variant                                                                                                            |
| rs1341770513 | intron_variant,genic_upstream_transcript_variant                                                                          |
| rs1341850825 | intron_variant                                                                                                            |
| rs1341883889 | intron_variant                                                                                                            |
| rs1341923625 | genic_downstream_transcript_variant,intron_variant                                                                        |
| rs1341952484 | intron_variant,genic_upstream_transcript_variant                                                                          |
| rs1341991399 | intron_variant,genic_upstream_transcript_variant                                                                          |
| rs1342047696 | genic_downstream_transcript_variant,intron_variant                                                                        |
| rs1342062456 | intron_variant                                                                                                            |
| rs1342124111 | intron_variant                                                                                                            |
| rs1342142633 | intron_variant,genic_upstream_transcript_variant                                                                          |
| rs1342203050 | intron_variant                                                                                                            |
| rs1342223243 | non_coding_transcript_variant,3_prime_UTR_variant,genic_downstream_transcript_variant                                     |
| rs1342265486 | intron_variant,genic_upstream_transcript_variant                                                                          |

|              |                                                                                                                         |
|--------------|-------------------------------------------------------------------------------------------------------------------------|
| rs1342292659 | intron_variant,upstream_transcript_variant,genic_upstream_transcript_variant                                            |
| rs1342354302 | intron_variant,upstream_transcript_variant,genic_upstream_transcript_variant                                            |
| rs1342386401 | intron_variant                                                                                                          |
| rs1342428691 | intron_variant                                                                                                          |
| rs1342456081 | intron_variant                                                                                                          |
| rs1342458876 | intron_variant,upstream_transcript_variant,genic_upstream_transcript_variant                                            |
| rs1342529891 | intron_variant                                                                                                          |
| rs1342535646 | genic_downstream_transcript_variant,intron_variant                                                                      |
| rs1342574948 | non_coding_transcript_variant,intron_variant,coding_sequence_variant,missense_variant,genic_upstream_transcript_variant |
| rs1342594643 | intron_variant                                                                                                          |
| rs1342598916 | intron_variant                                                                                                          |
| rs1342602156 | intron_variant,genic_upstream_transcript_variant                                                                        |
| rs1342637597 | genic_downstream_transcript_variant,intron_variant                                                                      |
| rs1342637662 | intron_variant                                                                                                          |
| rs1342654767 | intron_variant                                                                                                          |
| rs1342706236 | intron_variant,genic_upstream_transcript_variant                                                                        |
| rs1342725448 | non_coding_transcript_variant,3_prime_UTR_variant,genic_downstream_transcript_variant                                   |
| rs1342734617 | non_coding_transcript_variant,splice_donor_variant,intron_variant,genic_upstream_transcript_variant                     |
| rs1342743446 | genic_downstream_transcript_variant,intron_variant                                                                      |
| rs1342756381 | intron_variant,5_prime_UTR_variant                                                                                      |
| rs1342806465 | intron_variant,genic_upstream_transcript_variant                                                                        |
| rs1342854839 | intron_variant,genic_upstream_transcript_variant                                                                        |
| rs1342894980 | genic_downstream_transcript_variant,intron_variant                                                                      |
| rs1342917690 | intron_variant,genic_upstream_transcript_variant                                                                        |
| rs1342934942 | intron_variant,genic_upstream_transcript_variant                                                                        |
| rs1342987227 | intron_variant                                                                                                          |
| rs1342990510 | intron_variant,genic_upstream_transcript_variant                                                                        |
| rs1343015346 | downstream_transcript_variant,genic_downstream_transcript_variant,intron_variant                                        |
| rs1343017179 | intron_variant,genic_upstream_transcript_variant                                                                        |
| rs1343020085 | intron_variant                                                                                                          |
| rs1343023828 | intron_variant                                                                                                          |
| rs1343027955 | downstream_transcript_variant,genic_downstream_transcript_variant,intron_variant                                        |
| rs1343065146 | genic_downstream_transcript_variant,intron_variant                                                                      |
| rs1343092185 | intron_variant                                                                                                          |
| rs1343106958 | intron_variant                                                                                                          |
| rs1343108868 | intron_variant                                                                                                          |
| rs1343122346 | intron_variant                                                                                                          |
| rs1343134723 | intron_variant,genic_upstream_transcript_variant                                                                        |
| rs1343137707 | intron_variant,genic_upstream_transcript_variant                                                                        |
| rs1343175330 | intron_variant                                                                                                          |
| rs1343180032 | intron_variant                                                                                                          |
| rs1343194599 | intron_variant,genic_upstream_transcript_variant                                                                        |
| rs1343257232 | intron_variant                                                                                                          |
| rs1343303134 | intron_variant                                                                                                          |
| rs1343320758 | genic_downstream_transcript_variant,intron_variant                                                                      |
| rs1343323331 | intron_variant                                                                                                          |
| rs1343335601 | intron_variant                                                                                                          |
| rs1343346143 | genic_downstream_transcript_variant,intron_variant                                                                      |
| rs1343399129 | genic_downstream_transcript_variant,intron_variant                                                                      |
| rs1343401962 | genic_downstream_transcript_variant,intron_variant                                                                      |
| rs1343409141 | genic_downstream_transcript_variant,intron_variant                                                                      |
| rs1343421107 | intron_variant,genic_upstream_transcript_variant                                                                        |
| rs1343440072 | intron_variant,genic_upstream_transcript_variant                                                                        |
| rs1343460085 | intron_variant                                                                                                          |
| rs1343474952 | intron_variant                                                                                                          |
| rs1343493697 | intron_variant                                                                                                          |
| rs1343500564 | intron_variant                                                                                                          |
| rs1343509937 | intron_variant,genic_upstream_transcript_variant                                                                        |
| rs1343525846 | intron_variant,genic_upstream_transcript_variant                                                                        |
| rs1343529498 | non_coding_transcript_variant,genic_downstream_transcript_variant,coding_sequence_variant,missense_variant              |
| rs1343567888 | genic_downstream_transcript_variant,intron_variant                                                                      |
| rs1343588073 | intron_variant                                                                                                          |
| rs1343656664 | intron_variant,genic_upstream_transcript_variant                                                                        |
| rs1343674412 | non_coding_transcript_variant,intron_variant,coding_sequence_variant,missense_variant,genic_upstream_transcript_variant |
| rs1343676664 | genic_downstream_transcript_variant,intron_variant                                                                      |
| rs1343762424 | intron_variant,genic_upstream_transcript_variant                                                                        |
| rs1343779719 | intron_variant                                                                                                          |
| rs1343787790 | intron_variant                                                                                                          |
| rs1343804330 | intron_variant                                                                                                          |
| rs1343823149 | intron_variant                                                                                                          |
| rs1343864308 | genic_downstream_transcript_variant,intron_variant                                                                      |
| rs1343918198 | intron_variant,genic_upstream_transcript_variant                                                                        |
| rs1343957950 | genic_downstream_transcript_variant,intron_variant                                                                      |
| rs1343980167 | intron_variant                                                                                                          |

|              |                                                                                                   |
|--------------|---------------------------------------------------------------------------------------------------|
| rs1344007292 | intron_variant,genic_upstream_transcript_variant                                                  |
| rs1344108273 | intron_variant,genic_upstream_transcript_variant                                                  |
| rs1344147526 | intron_variant,genic_upstream_transcript_variant                                                  |
| rs1344153277 | genic_downstream_transcript_variant,intron_variant                                                |
| rs1344248489 | intron_variant,genic_upstream_transcript_variant                                                  |
| rs1344279266 | intron_variant                                                                                    |
| rs1344280412 | intron_variant                                                                                    |
| rs1344298211 | intron_variant,genic_upstream_transcript_variant                                                  |
| rs1344323380 | intron_variant,genic_upstream_transcript_variant                                                  |
| rs1344391274 | intron_variant,genic_upstream_transcript_variant                                                  |
| rs1344417174 | intron_variant                                                                                    |
| rs1344426944 | non_coding_transcript_variant,3_prime_UTR_variant,genic_downstream_transcript_variant             |
| rs1344439719 | intron_variant,upstream_transcript_variant,genic_upstream_transcript_variant                      |
| rs1344485271 | intron_variant,genic_upstream_transcript_variant                                                  |
| rs1344563062 | genic_downstream_transcript_variant,intron_variant                                                |
| rs1344642921 | intron_variant                                                                                    |
| rs1344648064 | genic_downstream_transcript_variant,intron_variant                                                |
| rs1344651260 | intron_variant,genic_upstream_transcript_variant                                                  |
| rs1344717938 | genic_downstream_transcript_variant,intron_variant                                                |
| rs1344737127 | intron_variant                                                                                    |
| rs1344761436 | genic_downstream_transcript_variant,intron_variant                                                |
| rs1344782183 | intron_variant,genic_upstream_transcript_variant                                                  |
| rs1344872497 | intron_variant,genic_upstream_transcript_variant                                                  |
| rs1344876785 | intron_variant,genic_upstream_transcript_variant                                                  |
| rs1344889163 | intron_variant                                                                                    |
| rs1344962806 | intron_variant,upstream_transcript_variant,genic_upstream_transcript_variant                      |
| rs1344969402 | non_coding_transcript_variant,3_prime_UTR_variant,genic_downstream_transcript_variant             |
| rs1344980497 | intron_variant                                                                                    |
| rs1344989128 | intron_variant,upstream_transcript_variant,genic_upstream_transcript_variant                      |
| rs1344991350 | intron_variant                                                                                    |
| rs1345001793 | intron_variant,genic_upstream_transcript_variant                                                  |
| rs1345059696 | intron_variant                                                                                    |
| rs1345075643 | non_coding_transcript_variant,3_prime_UTR_variant,genic_downstream_transcript_variant             |
| rs1345085602 | intron_variant                                                                                    |
| rs1345107152 | intron_variant,genic_upstream_transcript_variant                                                  |
| rs1345162038 | intron_variant                                                                                    |
| rs1345212101 | genic_downstream_transcript_variant,intron_variant                                                |
| rs1345244655 | intron_variant,genic_upstream_transcript_variant                                                  |
| rs1345247311 | genic_downstream_transcript_variant,intron_variant                                                |
| rs1345256864 | intron_variant,genic_upstream_transcript_variant                                                  |
| rs1345272234 | intron_variant                                                                                    |
| rs1345273237 | intron_variant,genic_upstream_transcript_variant                                                  |
| rs1345302567 | intron_variant,genic_upstream_transcript_variant                                                  |
| rs1345346817 | intron_variant,genic_upstream_transcript_variant                                                  |
| rs1345348634 | intron_variant                                                                                    |
| rs1345365382 | intron_variant,genic_upstream_transcript_variant                                                  |
| rs1345377535 | non_coding_transcript_variant,3_prime_UTR_variant,genic_downstream_transcript_variant             |
| rs1345380298 | genic_downstream_transcript_variant,intron_variant                                                |
| rs1345380388 | intron_variant,genic_upstream_transcript_variant                                                  |
| rs1345398908 | intron_variant                                                                                    |
| rs1345403558 | intron_variant                                                                                    |
| rs1345450709 | intron_variant,genic_upstream_transcript_variant                                                  |
| rs1345451155 | intron_variant                                                                                    |
| rs1345472532 | genic_downstream_transcript_variant,intron_variant                                                |
| rs1345488283 | intron_variant                                                                                    |
| rs1345494226 | intron_variant                                                                                    |
| rs1345510115 | genic_downstream_transcript_variant,intron_variant                                                |
| rs1345511794 | intron_variant,genic_upstream_transcript_variant                                                  |
| rs1345522425 | intron_variant                                                                                    |
| rs1345545341 | intron_variant,genic_upstream_transcript_variant                                                  |
| rs1345557081 | genic_downstream_transcript_variant,intron_variant                                                |
| rs1345591332 | intron_variant                                                                                    |
| rs1345607283 | 2KB_upstream_variant,intron_variant,upstream_transcript_variant,genic_upstream_transcript_variant |
| rs1345608539 | intron_variant                                                                                    |
| rs1345617396 | 2KB_upstream_variant,intron_variant,upstream_transcript_variant,genic_upstream_transcript_variant |
| rs1345664285 | intron_variant                                                                                    |
| rs1345667396 | intron_variant,genic_upstream_transcript_variant                                                  |
| rs1345672182 | intron_variant,genic_upstream_transcript_variant                                                  |
| rs1345673956 | intron_variant,genic_upstream_transcript_variant                                                  |
| rs1345681864 | intron_variant                                                                                    |
| rs1345699239 | intron_variant                                                                                    |
| rs1345769310 | intron_variant,upstream_transcript_variant,genic_upstream_transcript_variant                      |
| rs1345774417 | intron_variant,genic_upstream_transcript_variant                                                  |
| rs1345776014 | genic_downstream_transcript_variant,intron_variant                                                |

|              |                                                                                                                         |
|--------------|-------------------------------------------------------------------------------------------------------------------------|
| rs1345795109 | genic_downstream_transcript_variant,intron_variant                                                                      |
| rs1345802169 | genic_downstream_transcript_variant,intron_variant                                                                      |
| rs1345850536 | intron_variant,genic_upstream_transcript_variant                                                                        |
| rs1345851722 | intron_variant,genic_upstream_transcript_variant                                                                        |
| rs1345857520 | non_coding_transcript_variant,intron_variant,coding_sequence_variant,missense_variant,genic_upstream_transcript_variant |
| rs1345932692 | intron_variant,genic_upstream_transcript_variant                                                                        |
| rs1345947614 | intron_variant,genic_upstream_transcript_variant                                                                        |
| rs1345978560 | intron_variant                                                                                                          |
| rs1346002112 | intron_variant,genic_upstream_transcript_variant                                                                        |
| rs1346005111 | intron_variant,genic_upstream_transcript_variant                                                                        |
| rs1346018097 | intron_variant                                                                                                          |
| rs1346031676 | intron_variant,genic_upstream_transcript_variant                                                                        |
| rs1346033934 | genic_downstream_transcript_variant,intron_variant                                                                      |
| rs1346042634 | intron_variant,genic_upstream_transcript_variant                                                                        |
| rs1346139588 | intron_variant                                                                                                          |
| rs1346253737 | intron_variant,genic_upstream_transcript_variant                                                                        |
| rs1346256946 | genic_downstream_transcript_variant,intron_variant                                                                      |
| rs1346277635 | intron_variant                                                                                                          |
| rs1346366082 | intron_variant,genic_upstream_transcript_variant                                                                        |
| rs1346372147 | genic_downstream_transcript_variant,intron_variant                                                                      |
| rs1346382926 | intron_variant,genic_upstream_transcript_variant                                                                        |
| rs1346391573 | intron_variant,genic_upstream_transcript_variant                                                                        |
| rs1346406065 | genic_upstream_transcript_variant,intron_variant,upstream_transcript_variant,2KB_upstream_variant                       |
| rs1346438165 | intron_variant,genic_upstream_transcript_variant                                                                        |
| rs1346445675 | intron_variant                                                                                                          |
| rs1346459780 | genic_upstream_transcript_variant,intron_variant                                                                        |
| rs1346491930 | intron_variant                                                                                                          |
| rs1346525560 | genic_upstream_transcript_variant,upstream_transcript_variant,intron_variant                                            |
| rs1346537002 | genic_downstream_transcript_variant,intron_variant                                                                      |
| rs1346546327 | genic_downstream_transcript_variant,intron_variant                                                                      |
| rs1346563051 | genic_upstream_transcript_variant,intron_variant                                                                        |
| rs1346572945 | genic_upstream_transcript_variant,intron_variant                                                                        |
| rs1346631305 | intron_variant                                                                                                          |
| rs1346671591 | genic_upstream_transcript_variant,2KB_upstream_variant,intron_variant,upstream_transcript_variant                       |
| rs1346753195 | genic_upstream_transcript_variant,intron_variant                                                                        |
| rs1346773991 | intron_variant                                                                                                          |
| rs1346799202 | genic_downstream_transcript_variant,intron_variant                                                                      |
| rs1346800125 | genic_upstream_transcript_variant,intron_variant                                                                        |
| rs1346863327 | intron_variant                                                                                                          |
| rs1346868420 | genic_upstream_transcript_variant,intron_variant                                                                        |
| rs1346868648 | genic_downstream_transcript_variant,intron_variant                                                                      |
| rs1346914646 | intron_variant                                                                                                          |
| rs1346916475 | genic_downstream_transcript_variant,intron_variant                                                                      |
| rs1346922386 | genic_upstream_transcript_variant,intron_variant                                                                        |
| rs1346963309 | intron_variant                                                                                                          |
| rs1346985134 | genic_upstream_transcript_variant,2KB_upstream_variant,intron_variant,upstream_transcript_variant                       |
| rs1347014302 | genic_upstream_transcript_variant,intron_variant                                                                        |
| rs1347024955 | genic_upstream_transcript_variant,intron_variant                                                                        |
| rs1347029293 | intron_variant                                                                                                          |
| rs1347031392 | genic_upstream_transcript_variant,intron_variant                                                                        |
| rs1347035704 | intron_variant                                                                                                          |
| rs1347090299 | genic_upstream_transcript_variant,intron_variant                                                                        |
| rs1347098677 | intron_variant                                                                                                          |
| rs1347135941 | non_coding_transcript_variant,3_prime_UTR_variant,genic_downstream_transcript_variant                                   |
| rs1347217377 | intron_variant                                                                                                          |
| rs1347254562 | genic_upstream_transcript_variant,intron_variant                                                                        |
| rs1347282546 | genic_downstream_transcript_variant,intron_variant                                                                      |
| rs1347299309 | genic_upstream_transcript_variant,intron_variant                                                                        |
| rs1347317504 | genic_downstream_transcript_variant,intron_variant                                                                      |
| rs1347343321 | genic_downstream_transcript_variant,intron_variant                                                                      |
| rs1347359907 | genic_upstream_transcript_variant,intron_variant                                                                        |
| rs1347387694 | genic_upstream_transcript_variant,intron_variant                                                                        |
| rs1347424934 | genic_downstream_transcript_variant,intron_variant                                                                      |
| rs1347429977 | genic_downstream_transcript_variant,intron_variant                                                                      |
| rs1347453693 | intron_variant                                                                                                          |
| rs1347483123 | genic_downstream_transcript_variant,intron_variant                                                                      |
| rs1347507639 | intron_variant                                                                                                          |
| rs1347538005 | intron_variant                                                                                                          |
| rs1347605036 | genic_upstream_transcript_variant,intron_variant                                                                        |
| rs1347619289 | genic_upstream_transcript_variant,intron_variant                                                                        |
| rs1347654408 | intron_variant                                                                                                          |
| rs1347660993 | genic_downstream_transcript_variant,intron_variant                                                                      |
| rs1347670168 | genic_upstream_transcript_variant,intron_variant                                                                        |
| rs1347687514 | genic_upstream_transcript_variant,intron_variant                                                                        |

|              |                                                                                                            |
|--------------|------------------------------------------------------------------------------------------------------------|
| rs1347689589 | genic_downstream_transcript_variant,intron_variant                                                         |
| rs1347736125 | intron_variant                                                                                             |
| rs1347737002 | non_coding_transcript_variant,missense_variant,genic_downstream_transcript_variant,coding_sequence_variant |
| rs1347751396 | genic_upstream_transcript_variant,intron_variant                                                           |
| rs1347753004 | genic_upstream_transcript_variant,2KB_upstream_variant,intron_variant,upstream_transcript_variant          |
| rs1347821032 | genic_upstream_transcript_variant,intron_variant                                                           |
| rs1347886925 | genic_upstream_transcript_variant,intron_variant                                                           |
| rs1347961257 | genic_upstream_transcript_variant,intron_variant                                                           |
| rs1347997990 | genic_upstream_transcript_variant,intron_variant                                                           |
| rs1348001734 | genic_downstream_transcript_variant,intron_variant                                                         |
| rs1348034286 | genic_upstream_transcript_variant,intron_variant                                                           |
| rs1348081015 | genic_upstream_transcript_variant,intron_variant                                                           |
| rs1348081272 | intron_variant                                                                                             |
| rs1348096668 | genic_upstream_transcript_variant,intron_variant                                                           |
| rs1348123448 | intron_variant                                                                                             |
| rs1348202567 | genic_upstream_transcript_variant,2KB_upstream_variant,upstream_transcript_variant,intron_variant          |
| rs1348218284 | genic_upstream_transcript_variant,intron_variant                                                           |
| rs1348232582 | genic_upstream_transcript_variant,intron_variant                                                           |
| rs1348251462 | non_coding_transcript_variant,synonymous_variant,coding_sequence_variant                                   |
| rs1348308327 | genic_upstream_transcript_variant,upstream_transcript_variant,intron_variant                               |
| rs1348351473 | genic_upstream_transcript_variant,intron_variant                                                           |
| rs1348354147 | genic_upstream_transcript_variant,intron_variant                                                           |
| rs1348454209 | genic_upstream_transcript_variant,intron_variant                                                           |
| rs1348479090 | intron_variant                                                                                             |
| rs1348514662 | genic_downstream_transcript_variant,intron_variant                                                         |
| rs1348537909 | genic_downstream_transcript_variant,intron_variant                                                         |
| rs1348559967 | genic_upstream_transcript_variant,intron_variant                                                           |
| rs1348582788 | intron_variant                                                                                             |
| rs1348591008 | genic_upstream_transcript_variant,intron_variant                                                           |
| rs1348602093 | genic_upstream_transcript_variant,intron_variant                                                           |
| rs1348679801 | genic_upstream_transcript_variant,intron_variant                                                           |
| rs1348697579 | genic_upstream_transcript_variant,upstream_transcript_variant,intron_variant                               |
| rs1348720324 | genic_upstream_transcript_variant,intron_variant                                                           |
| rs1348770354 | intron_variant                                                                                             |
| rs1348804266 | intron_variant                                                                                             |
| rs1348809709 | intron_variant                                                                                             |
| rs1348826248 | genic_upstream_transcript_variant,intron_variant                                                           |
| rs1348841679 | non_coding_transcript_variant,missense_variant,coding_sequence_variant                                     |
| rs1348933541 | genic_upstream_transcript_variant,intron_variant                                                           |
| rs1348952127 | genic_downstream_transcript_variant,intron_variant                                                         |
| rs1348973580 | intron_variant                                                                                             |
| rs1348978879 | genic_downstream_transcript_variant,intron_variant                                                         |
| rs1349029495 | genic_downstream_transcript_variant,intron_variant                                                         |
| rs1349031337 | genic_upstream_transcript_variant,intron_variant                                                           |
| rs1349044989 | genic_upstream_transcript_variant,intron_variant                                                           |
| rs1349081796 | genic_upstream_transcript_variant,intron_variant                                                           |
| rs1349114861 | genic_upstream_transcript_variant,intron_variant,5_prime_UTR_variant,upstream_transcript_variant           |
| rs1349150963 | non_coding_transcript_variant,3_prime_UTR_variant,genic_downstream_transcript_variant                      |
| rs1349192656 | intron_variant                                                                                             |
| rs1349224260 | genic_upstream_transcript_variant,intron_variant                                                           |
| rs1349242213 | genic_downstream_transcript_variant,intron_variant                                                         |
| rs1349267470 | genic_downstream_transcript_variant,intron_variant                                                         |
| rs1349269997 | genic_downstream_transcript_variant,intron_variant                                                         |
| rs1349287659 | intron_variant                                                                                             |
| rs1349370738 | intron_variant                                                                                             |
| rs1349386552 | intron_variant                                                                                             |
| rs1349401266 | genic_downstream_transcript_variant,intron_variant                                                         |
| rs1349412983 | genic_upstream_transcript_variant,2KB_upstream_variant,intron_variant,upstream_transcript_variant          |
| rs1349416293 | genic_downstream_transcript_variant,intron_variant                                                         |
| rs1349437539 | genic_downstream_transcript_variant,intron_variant                                                         |
| rs1349443727 | genic_upstream_transcript_variant,intron_variant                                                           |
| rs1349447437 | genic_upstream_transcript_variant,2KB_upstream_variant,intron_variant,upstream_transcript_variant          |
| rs1349457728 | genic_downstream_transcript_variant,intron_variant                                                         |
| rs1349460819 | genic_downstream_transcript_variant,intron_variant                                                         |
| rs1349560405 | intron_variant                                                                                             |
| rs1349561470 | genic_upstream_transcript_variant,intron_variant                                                           |
| rs1349613502 | intron_variant                                                                                             |
| rs1349631995 | intron_variant                                                                                             |
| rs1349632232 | genic_downstream_transcript_variant,intron_variant                                                         |
| rs1349710915 | intron_variant                                                                                             |
| rs1349731282 | intron_variant                                                                                             |
| rs1349736401 | genic_downstream_transcript_variant,intron_variant                                                         |
| rs1349791092 | genic_upstream_transcript_variant,intron_variant                                                           |
| rs1349793907 | genic_upstream_transcript_variant,intron_variant                                                           |

|              |                                                                                                   |
|--------------|---------------------------------------------------------------------------------------------------|
| rs1349820824 | genic_downstream_transcript_variant,intron_variant                                                |
| rs1349827644 | intron_variant                                                                                    |
| rs1349833588 | genic_downstream_transcript_variant,intron_variant                                                |
| rs1349835800 | genic_upstream_transcript_variant,intron_variant                                                  |
| rs1349912980 | intron_variant                                                                                    |
| rs1349945025 | intron_variant                                                                                    |
| rs1349947834 | genic_upstream_transcript_variant,intron_variant                                                  |
| rs1350038140 | genic_upstream_transcript_variant,intron_variant                                                  |
| rs1350055738 | genic_upstream_transcript_variant,intron_variant                                                  |
| rs1350069995 | intron_variant                                                                                    |
| rs1350070170 | genic_downstream_transcript_variant,intron_variant                                                |
| rs1350111216 | genic_upstream_transcript_variant,intron_variant                                                  |
| rs1350164030 | intron_variant                                                                                    |
| rs1350192437 | genic_downstream_transcript_variant,intron_variant                                                |
| rs1350264736 | genic_upstream_transcript_variant,intron_variant                                                  |
| rs1350282779 | genic_upstream_transcript_variant,2KB_upstream_variant,intron_variant,upstream_transcript_variant |
| rs1350293447 | genic_upstream_transcript_variant,intron_variant                                                  |
| rs1350311480 | intron_variant                                                                                    |
| rs1350342239 | genic_upstream_transcript_variant,intron_variant                                                  |
| rs1350402208 | intron_variant                                                                                    |
| rs1350423153 | genic_downstream_transcript_variant,intron_variant                                                |
| rs1350442422 | genic_upstream_transcript_variant,intron_variant                                                  |
| rs1350459796 | intron_variant                                                                                    |
| rs1350473304 | intron_variant                                                                                    |
| rs1350496151 | genic_downstream_transcript_variant,intron_variant                                                |
| rs1350511700 | genic_downstream_transcript_variant,intron_variant                                                |
| rs1350538518 | genic_upstream_transcript_variant,intron_variant                                                  |
| rs1350645135 | genic_upstream_transcript_variant,intron_variant                                                  |
| rs1350649711 | intron_variant                                                                                    |
| rs1350670891 | intron_variant                                                                                    |
| rs1350675858 | genic_upstream_transcript_variant,intron_variant                                                  |
| rs1350685826 | intron_variant                                                                                    |
| rs1350728182 | genic_upstream_transcript_variant,intron_variant                                                  |
| rs1350750087 | genic_downstream_transcript_variant,intron_variant                                                |
| rs1350755691 | non_coding_transcript_variant,3_prime_UTR_variant,genic_downstream_transcript_variant             |
| rs1350775209 | intron_variant                                                                                    |
| rs1350808964 | intron_variant                                                                                    |
| rs1350848955 | intron_variant                                                                                    |
| rs1350858633 | genic_upstream_transcript_variant,2KB_upstream_variant,intron_variant,upstream_transcript_variant |
| rs1350860464 | genic_downstream_transcript_variant,intron_variant                                                |
| rs1350874568 | genic_upstream_transcript_variant,2KB_upstream_variant,intron_variant,upstream_transcript_variant |
| rs1350889917 | intron_variant                                                                                    |
| rs1350930754 | genic_downstream_transcript_variant,intron_variant                                                |
| rs1350962296 | intron_variant                                                                                    |
| rs1350967660 | downstream_transcript_variant,genic_downstream_transcript_variant,intron_variant                  |
| rs1350969026 | genic_upstream_transcript_variant,intron_variant                                                  |
| rs1351036076 | intron_variant                                                                                    |
| rs1351043132 | intron_variant                                                                                    |
| rs1351070608 | genic_downstream_transcript_variant,intron_variant                                                |
| rs1351083834 | downstream_transcript_variant,genic_downstream_transcript_variant,intron_variant                  |
| rs1351132332 | genic_upstream_transcript_variant,2KB_upstream_variant,upstream_transcript_variant,intron_variant |
| rs1351165181 | intron_variant                                                                                    |
| rs1351171595 | intron_variant                                                                                    |
| rs1351182810 | intron_variant                                                                                    |
| rs1351192155 | genic_upstream_transcript_variant,intron_variant                                                  |
| rs1351192699 | genic_upstream_transcript_variant,intron_variant                                                  |
| rs1351210098 | genic_downstream_transcript_variant,intron_variant                                                |
| rs1351264833 | non_coding_transcript_variant,missense_variant,coding_sequence_variant                            |
| rs1351295846 | genic_upstream_transcript_variant,intron_variant                                                  |
| rs1351385255 | genic_upstream_transcript_variant,intron_variant                                                  |
| rs1351387400 | genic_downstream_transcript_variant,intron_variant                                                |
| rs1351394598 | genic_upstream_transcript_variant,intron_variant                                                  |
| rs1351402141 | intron_variant                                                                                    |
| rs1351442838 | intron_variant                                                                                    |
| rs1351448764 | genic_upstream_transcript_variant,upstream_transcript_variant,intron_variant                      |
| rs1351475769 | genic_downstream_transcript_variant,intron_variant                                                |
| rs1351511652 | genic_upstream_transcript_variant,intron_variant                                                  |
| rs1351525859 | intron_variant                                                                                    |
| rs1351527149 | genic_downstream_transcript_variant,intron_variant                                                |
| rs1351541087 | genic_downstream_transcript_variant,intron_variant                                                |
| rs1351583207 | intron_variant                                                                                    |
| rs1351650393 | intron_variant                                                                                    |
| rs1351668958 | genic_upstream_transcript_variant,2KB_upstream_variant,upstream_transcript_variant,intron_variant |
| rs1351672109 | intron_variant                                                                                    |

|              |                                                                                                                           |
|--------------|---------------------------------------------------------------------------------------------------------------------------|
| rs1351678757 | genic_upstream_transcript_variant,intron_variant                                                                          |
| rs1351704846 | genic_upstream_transcript_variant,intron_variant                                                                          |
| rs1351737025 | intron_variant                                                                                                            |
| rs1351742428 | genic_downstream_transcript_variant,intron_variant                                                                        |
| rs1351778229 | genic_downstream_transcript_variant,intron_variant                                                                        |
| rs1351783172 | genic_upstream_transcript_variant,upstream_transcript_variant,intron_variant                                              |
| rs1351792123 | genic_upstream_transcript_variant,intron_variant                                                                          |
| rs1351811919 | genic_downstream_transcript_variant,intron_variant                                                                        |
| rs1351827833 | genic_downstream_transcript_variant,intron_variant                                                                        |
| rs1351854488 | intron_variant                                                                                                            |
| rs1351880689 | genic_upstream_transcript_variant,intron_variant                                                                          |
| rs1351911707 | genic_upstream_transcript_variant,intron_variant                                                                          |
| rs1351915320 | genic_downstream_transcript_variant,intron_variant                                                                        |
| rs1351935080 | intron_variant                                                                                                            |
| rs1351982820 | intron_variant                                                                                                            |
| rs1352017920 | genic_upstream_transcript_variant,intron_variant                                                                          |
| rs1352046770 | genic_downstream_transcript_variant,intron_variant                                                                        |
| rs1352074410 | genic_downstream_transcript_variant,intron_variant                                                                        |
| rs1352089193 | genic_upstream_transcript_variant,intron_variant                                                                          |
| rs1352126032 | intron_variant                                                                                                            |
| rs1352136857 | intron_variant                                                                                                            |
| rs1352168002 | genic_upstream_transcript_variant,intron_variant                                                                          |
| rs1352202377 | intron_variant                                                                                                            |
| rs1352212645 | genic_upstream_transcript_variant,intron_variant                                                                          |
| rs1352263140 | genic_upstream_transcript_variant,upstream_transcript_variant,intron_variant                                              |
| rs1352282130 | intron_variant                                                                                                            |
| rs1352292316 | genic_upstream_transcript_variant,intron_variant                                                                          |
| rs1352302316 | intron_variant                                                                                                            |
| rs1352337226 | genic_downstream_transcript_variant,intron_variant                                                                        |
| rs1352338219 | intron_variant                                                                                                            |
| rs1352339046 | intron_variant                                                                                                            |
| rs1352343997 | genic_upstream_transcript_variant,intron_variant                                                                          |
| rs1352353948 | genic_downstream_transcript_variant,intron_variant                                                                        |
| rs1352435675 | genic_upstream_transcript_variant,intron_variant                                                                          |
| rs1352470359 | genic_upstream_transcript_variant,intron_variant                                                                          |
| rs1352478752 | genic_downstream_transcript_variant,intron_variant                                                                        |
| rs1352487633 | genic_downstream_transcript_variant,intron_variant                                                                        |
| rs1352555756 | genic_downstream_transcript_variant,intron_variant                                                                        |
| rs1352560909 | genic_upstream_transcript_variant,intron_variant                                                                          |
| rs1352564413 | genic_downstream_transcript_variant,intron_variant                                                                        |
| rs1352566238 | genic_upstream_transcript_variant,intron_variant                                                                          |
| rs1352578573 | genic_upstream_transcript_variant,2KB_upstream_variant,upstream_transcript_variant,intron_variant                         |
| rs1352602498 | intron_variant                                                                                                            |
| rs1352606563 | genic_downstream_transcript_variant,intron_variant                                                                        |
| rs1352641926 | genic_upstream_transcript_variant,intron_variant                                                                          |
| rs1352691383 | genic_downstream_transcript_variant,intron_variant                                                                        |
| rs1352729221 | genic_upstream_transcript_variant,upstream_transcript_variant,intron_variant                                              |
| rs1352735958 | intron_variant                                                                                                            |
| rs1352758140 | genic_upstream_transcript_variant,intron_variant                                                                          |
| rs1352761667 | genic_upstream_transcript_variant,non_coding_transcript_variant,intron_variant,synonymous_variant,coding_sequence_variant |
| rs1352772871 | genic_upstream_transcript_variant,intron_variant                                                                          |
| rs1352779547 | intron_variant                                                                                                            |
| rs1352830409 | genic_upstream_transcript_variant,upstream_transcript_variant,intron_variant                                              |
| rs1352837438 | genic_downstream_transcript_variant,intron_variant                                                                        |
| rs1352857140 | intron_variant                                                                                                            |
| rs1352860038 | genic_upstream_transcript_variant,intron_variant                                                                          |
| rs1352863206 | intron_variant                                                                                                            |
| rs1352874187 | intron_variant                                                                                                            |
| rs1352892055 | intron_variant                                                                                                            |
| rs1352916958 | intron_variant                                                                                                            |
| rs1352941807 | intron_variant                                                                                                            |
| rs1352971438 | genic_upstream_transcript_variant,intron_variant                                                                          |
| rs1353007586 | genic_upstream_transcript_variant,intron_variant                                                                          |
| rs1353015135 | intron_variant                                                                                                            |
| rs1353070074 | genic_downstream_transcript_variant,intron_variant                                                                        |
| rs1353095486 | genic_downstream_transcript_variant,intron_variant                                                                        |
| rs1353118536 | genic_downstream_transcript_variant,intron_variant                                                                        |
| rs1353133879 | genic_downstream_transcript_variant,intron_variant                                                                        |
| rs1353170333 | genic_upstream_transcript_variant,intron_variant                                                                          |
| rs1353178670 | genic_upstream_transcript_variant,intron_variant                                                                          |
| rs1353198512 | intron_variant                                                                                                            |
| rs1353249876 | genic_upstream_transcript_variant,intron_variant                                                                          |
| rs1353259142 | intron_variant                                                                                                            |
| rs1353279424 | intron_variant                                                                                                            |

|              |                                                                                                              |
|--------------|--------------------------------------------------------------------------------------------------------------|
| rs1353329465 | genic_upstream_transcript_variant,2KB_upstream_variant,upstream_transcript_variant,intron_variant            |
| rs1353397392 | intron_variant                                                                                               |
| rs1353448417 | genic_upstream_transcript_variant,intron_variant                                                             |
| rs1353557106 | genic_upstream_transcript_variant,intron_variant                                                             |
| rs1353611697 | intron_variant                                                                                               |
| rs1353612134 | intron_variant                                                                                               |
| rs1353630836 | genic_upstream_transcript_variant,intron_variant                                                             |
| rs1353645459 | genic_downstream_transcript_variant,intron_variant                                                           |
| rs1353712617 | genic_upstream_transcript_variant,intron_variant                                                             |
| rs1353716199 | genic_downstream_transcript_variant,intron_variant                                                           |
| rs1353731578 | genic_downstream_transcript_variant,intron_variant                                                           |
| rs1353818791 | genic_upstream_transcript_variant,intron_variant                                                             |
| rs1353976564 | genic_downstream_transcript_variant,intron_variant                                                           |
| rs1354019290 | genic_downstream_transcript_variant,intron_variant                                                           |
| rs1354121610 | intron_variant                                                                                               |
| rs1354201129 | intron_variant                                                                                               |
| rs1354227374 | genic_upstream_transcript_variant,intron_variant                                                             |
| rs1354278877 | genic_upstream_transcript_variant,upstream_transcript_variant,intron_variant                                 |
| rs1354283359 | genic_upstream_transcript_variant,intron_variant                                                             |
| rs1354290053 | genic_upstream_transcript_variant,intron_variant                                                             |
| rs1354293833 | genic_downstream_transcript_variant,intron_variant                                                           |
| rs1354307983 | intron_variant                                                                                               |
| rs1354332314 | genic_upstream_transcript_variant,intron_variant                                                             |
| rs1354348320 | genic_upstream_transcript_variant,intron_variant                                                             |
| rs1354354733 | intron_variant                                                                                               |
| rs1354391169 | genic_upstream_transcript_variant,intron_variant                                                             |
| rs1354391607 | genic_upstream_transcript_variant,2KB_upstream_variant,intron_variant,upstream_transcript_variant            |
| rs1354417151 | genic_upstream_transcript_variant,intron_variant                                                             |
| rs1354424778 | genic_upstream_transcript_variant,intron_variant                                                             |
| rs1354435204 | intron_variant                                                                                               |
| rs1354498245 | genic_upstream_transcript_variant,intron_variant                                                             |
| rs1354500837 | genic_downstream_transcript_variant,intron_variant                                                           |
| rs1354520865 | genic_upstream_transcript_variant,intron_variant                                                             |
| rs1354524052 | genic_upstream_transcript_variant,intron_variant                                                             |
| rs1354541551 | intron_variant                                                                                               |
| rs1354543692 | genic_upstream_transcript_variant,intron_variant                                                             |
| rs1354554397 | intron_variant                                                                                               |
| rs1354568968 | genic_upstream_transcript_variant,intron_variant                                                             |
| rs1354570519 | genic_upstream_transcript_variant,intron_variant                                                             |
| rs1354591573 | intron_variant                                                                                               |
| rs1354636079 | intron_variant                                                                                               |
| rs1354639614 | genic_upstream_transcript_variant,intron_variant                                                             |
| rs1354651683 | intron_variant                                                                                               |
| rs1354651917 | genic_downstream_transcript_variant,intron_variant                                                           |
| rs1354653058 | genic_upstream_transcript_variant,intron_variant                                                             |
| rs1354686397 | genic_upstream_transcript_variant,intron_variant                                                             |
| rs1354714508 | intron_variant                                                                                               |
| rs1354740511 | genic_downstream_transcript_variant,intron_variant                                                           |
| rs1354775439 | intron_variant                                                                                               |
| rs1354775472 | non_coding_transcript_variant,3_prime_UTR_variant,genic_downstream_transcript_variant                        |
| rs1354779493 | intron_variant                                                                                               |
| rs1354782688 | genic_upstream_transcript_variant,intron_variant                                                             |
| rs1354785720 | intron_variant                                                                                               |
| rs1354862909 | genic_upstream_transcript_variant,intron_variant                                                             |
| rs1354881701 | genic_upstream_transcript_variant,upstream_transcript_variant,intron_variant                                 |
| rs1354895139 | genic_downstream_transcript_variant,intron_variant                                                           |
| rs1354911496 | intron_variant                                                                                               |
| rs1354925620 | intron_variant                                                                                               |
| rs1354964108 | intron_variant                                                                                               |
| rs1354984944 | genic_upstream_transcript_variant,intron_variant                                                             |
| rs1355028102 | genic_upstream_transcript_variant,intron_variant                                                             |
| rs1355058670 | genic_downstream_transcript_variant,intron_variant                                                           |
| rs1355075163 | genic_downstream_transcript_variant,intron_variant                                                           |
| rs1355100822 | non_coding_transcript_variant,synonymous_variant,genic_downstream_transcript_variant,coding_sequence_variant |
| rs1355101551 | intron_variant                                                                                               |
| rs1355122579 | intron_variant                                                                                               |
| rs1355136867 | genic_upstream_transcript_variant,intron_variant                                                             |
| rs1355144622 | genic_upstream_transcript_variant,intron_variant                                                             |
| rs1355144759 | intron_variant                                                                                               |
| rs1355165187 | genic_upstream_transcript_variant,2KB_upstream_variant,upstream_transcript_variant,intron_variant            |
| rs1355180273 | intron_variant                                                                                               |
| rs1355198989 | intron_variant                                                                                               |
| rs1355218012 | genic_downstream_transcript_variant,intron_variant                                                           |
| rs1355239358 | genic_upstream_transcript_variant,intron_variant                                                             |

|              |                                                                                                    |
|--------------|----------------------------------------------------------------------------------------------------|
| rs1355280937 | intron_variant                                                                                     |
| rs1355299660 | genic_upstream_transcript_variant,intron_variant                                                   |
| rs1355306497 | intron_variant                                                                                     |
| rs1355320235 | genic_upstream_transcript_variant,2KB_upstream_variant,upstream_transcript_variant,intron_variant  |
| rs1355332286 | intron_variant                                                                                     |
| rs1355374889 | genic_upstream_transcript_variant,upstream_transcript_variant,intron_variant                       |
| rs1355391983 | genic_upstream_transcript_variant,intron_variant                                                   |
| rs1355428376 | intron_variant                                                                                     |
| rs1355440320 | genic_upstream_transcript_variant,upstream_transcript_variant,intron_variant                       |
| rs1355484626 | intron_variant                                                                                     |
| rs1355544533 | intron_variant                                                                                     |
| rs1355663759 | genic_downstream_transcript_variant,intron_variant                                                 |
| rs1355684997 | genic_upstream_transcript_variant,intron_variant                                                   |
| rs1355694178 | intron_variant                                                                                     |
| rs1355709450 | intron_variant                                                                                     |
| rs1355767116 | genic_upstream_transcript_variant,2KB_upstream_variant,upstream_transcript_variant,intron_variant  |
| rs1355798175 | intron_variant                                                                                     |
| rs1355820389 | genic_downstream_transcript_variant,intron_variant                                                 |
| rs1355873895 | genic_upstream_transcript_variant,2KB_upstream_variant,intron_variant,upstream_transcript_variant  |
| rs1355906176 | genic_downstream_transcript_variant,intron_variant                                                 |
| rs1355924895 | intron_variant                                                                                     |
| rs1355949775 | genic_downstream_transcript_variant,intron_variant                                                 |
| rs1355964684 | genic_upstream_transcript_variant,intron_variant                                                   |
| rs1355987904 | genic_upstream_transcript_variant,non_coding_transcript_variant,5_prime_UTR_variant,intron_variant |
| rs1355990511 | genic_downstream_transcript_variant,intron_variant                                                 |
| rs1355998204 | genic_upstream_transcript_variant,intron_variant                                                   |
| rs1356022788 | intron_variant                                                                                     |
| rs1356043766 | genic_upstream_transcript_variant,intron_variant                                                   |
| rs1356052241 | genic_upstream_transcript_variant,intron_variant                                                   |
| rs1356055623 | intron_variant                                                                                     |
| rs1356107249 | genic_upstream_transcript_variant,intron_variant                                                   |
| rs1356112435 | intron_variant                                                                                     |
| rs1356140735 | genic_upstream_transcript_variant,intron_variant                                                   |
| rs1356159933 | intron_variant                                                                                     |
| rs1356171633 | genic_upstream_transcript_variant,2KB_upstream_variant,upstream_transcript_variant,intron_variant  |
| rs1356239940 | genic_upstream_transcript_variant,intron_variant,5_prime_UTR_variant,upstream_transcript_variant   |
| rs1356255068 | genic_upstream_transcript_variant,intron_variant                                                   |
| rs1356282089 | genic_downstream_transcript_variant,intron_variant                                                 |
| rs1356364729 | intron_variant                                                                                     |
| rs1356376883 | genic_downstream_transcript_variant,intron_variant                                                 |
| rs1356416799 | genic_downstream_transcript_variant,intron_variant                                                 |
| rs1356424482 | intron_variant                                                                                     |
| rs1356427557 | intron_variant                                                                                     |
| rs1356445659 | genic_upstream_transcript_variant,intron_variant                                                   |
| rs1356480828 | intron_variant                                                                                     |
| rs1356500675 | intron_variant                                                                                     |
| rs1356528138 | genic_upstream_transcript_variant,intron_variant                                                   |
| rs1356562963 | genic_upstream_transcript_variant,intron_variant                                                   |
| rs1356588179 | intron_variant                                                                                     |
| rs1356646352 | genic_upstream_transcript_variant,intron_variant                                                   |
| rs1356699546 | genic_upstream_transcript_variant,intron_variant                                                   |
| rs1356701074 | intron_variant                                                                                     |
| rs1356710358 | genic_upstream_transcript_variant,intron_variant                                                   |
| rs1356749515 | non_coding_transcript_variant,3_prime_UTR_variant,genic_downstream_transcript_variant              |
| rs1356767689 | intron_variant                                                                                     |
| rs1356807231 | intron_variant                                                                                     |
| rs1356868153 | genic_upstream_transcript_variant,intron_variant                                                   |
| rs1356903297 | intron_variant                                                                                     |
| rs1356905174 | genic_upstream_transcript_variant,intron_variant                                                   |
| rs1356911511 | genic_upstream_transcript_variant,intron_variant                                                   |
| rs1356928659 | genic_upstream_transcript_variant,intron_variant                                                   |
| rs1356938801 | intron_variant                                                                                     |
| rs1356955157 | genic_upstream_transcript_variant,2KB_upstream_variant,intron_variant,upstream_transcript_variant  |
| rs1356960569 | genic_downstream_transcript_variant,intron_variant                                                 |
| rs1357041710 | genic_upstream_transcript_variant,non_coding_transcript_variant,5_prime_UTR_variant,intron_variant |
| rs1357043145 | genic_upstream_transcript_variant,intron_variant                                                   |
| rs1357056117 | genic_upstream_transcript_variant,intron_variant                                                   |
| rs1357128457 | genic_downstream_transcript_variant,intron_variant                                                 |
| rs1357143582 | genic_upstream_transcript_variant,intron_variant                                                   |
| rs1357151176 | intron_variant                                                                                     |
| rs1357153890 | intron_variant                                                                                     |
| rs1357265123 | genic_upstream_transcript_variant,intron_variant                                                   |
| rs1357279459 | genic_upstream_transcript_variant,upstream_transcript_variant,intron_variant                       |
| rs1357310865 | genic_upstream_transcript_variant,intron_variant                                                   |

|              |                                                                                                                         |
|--------------|-------------------------------------------------------------------------------------------------------------------------|
| rs1357313956 | genic_downstream_transcript_variant,intron_variant                                                                      |
| rs1357350458 | non_coding_transcript_variant,3_prime_UTR_variant,genic_downstream_transcript_variant                                   |
| rs1357352399 | genic_upstream_transcript_variant,intron_variant                                                                        |
| rs1357379878 | genic_downstream_transcript_variant,intron_variant                                                                      |
| rs1357385277 | genic_upstream_transcript_variant,intron_variant                                                                        |
| rs1357412101 | genic_upstream_transcript_variant,upstream_transcript_variant,intron_variant                                            |
| rs1357412698 | genic_upstream_transcript_variant,intron_variant                                                                        |
| rs1357428950 | intron_variant                                                                                                          |
| rs1357435143 | intron_variant                                                                                                          |
| rs1357453854 | missense_variant,genic_upstream_transcript_variant,non_coding_transcript_variant,intron_variant,coding_sequence_variant |
| rs1357478725 | intron_variant                                                                                                          |
| rs1357487657 | genic_upstream_transcript_variant,intron_variant                                                                        |
| rs1357502290 | intron_variant                                                                                                          |
| rs1357512697 | genic_upstream_transcript_variant,2KB_upstream_variant,intron_variant,upstream_transcript_variant                       |
| rs1357514230 | genic_upstream_transcript_variant,intron_variant                                                                        |
| rs1357552046 | intron_variant                                                                                                          |
| rs1357581184 | intron_variant                                                                                                          |
| rs1357604473 | intron_variant                                                                                                          |
| rs1357624089 | intron_variant                                                                                                          |
| rs1357628123 | genic_upstream_transcript_variant,intron_variant                                                                        |
| rs1357660311 | genic_upstream_transcript_variant,intron_variant                                                                        |
| rs1357674788 | intron_variant                                                                                                          |
| rs1357701027 | intron_variant                                                                                                          |
| rs1357715815 | genic_upstream_transcript_variant,intron_variant                                                                        |
| rs1357743613 | genic_upstream_transcript_variant,intron_variant                                                                        |
| rs1357764260 | genic_upstream_transcript_variant,2KB_upstream_variant,upstream_transcript_variant,intron_variant                       |
| rs1357770062 | genic_upstream_transcript_variant,intron_variant                                                                        |
| rs1357771139 | genic_upstream_transcript_variant,intron_variant                                                                        |
| rs1357784591 | genic_downstream_transcript_variant,intron_variant                                                                      |
| rs1357798038 | intron_variant                                                                                                          |
| rs1357852540 | intron_variant                                                                                                          |
| rs1357878521 | genic_upstream_transcript_variant,intron_variant                                                                        |
| rs1357892881 | genic_downstream_transcript_variant,intron_variant                                                                      |
| rs1357966325 | genic_upstream_transcript_variant,intron_variant                                                                        |
| rs1357998666 | genic_upstream_transcript_variant,intron_variant                                                                        |
| rs1357998676 | genic_upstream_transcript_variant,intron_variant                                                                        |
| rs1358056439 | genic_upstream_transcript_variant,intron_variant                                                                        |
| rs1358064569 | intron_variant                                                                                                          |
| rs1358079693 | genic_upstream_transcript_variant,intron_variant                                                                        |
| rs1358080640 | genic_upstream_transcript_variant,upstream_transcript_variant,intron_variant                                            |
| rs1358106817 | intron_variant                                                                                                          |
| rs1358118948 | genic_upstream_transcript_variant,intron_variant                                                                        |
| rs1358133031 | intron_variant                                                                                                          |
| rs1358133149 | genic_upstream_transcript_variant,intron_variant                                                                        |
| rs1358142623 | genic_upstream_transcript_variant,intron_variant                                                                        |
| rs1358197090 | genic_downstream_transcript_variant,intron_variant                                                                      |
| rs1358242907 | intron_variant                                                                                                          |
| rs1358269357 | intron_variant                                                                                                          |
| rs1358300299 | genic_downstream_transcript_variant,intron_variant                                                                      |
| rs1358351135 | genic_upstream_transcript_variant,intron_variant                                                                        |
| rs1358364228 | genic_upstream_transcript_variant,intron_variant                                                                        |
| rs1358398757 | genic_downstream_transcript_variant,intron_variant                                                                      |
| rs1358403500 | intron_variant                                                                                                          |
| rs1358409191 | intron_variant                                                                                                          |
| rs1358456501 | genic_upstream_transcript_variant,intron_variant                                                                        |
| rs1358459698 | genic_upstream_transcript_variant,upstream_transcript_variant,intron_variant                                            |
| rs1358471387 | non_coding_transcript_variant,3_prime_UTR_variant,genic_downstream_transcript_variant                                   |
| rs1358482892 | genic_downstream_transcript_variant,intron_variant                                                                      |
| rs1358505053 | genic_downstream_transcript_variant,intron_variant                                                                      |
| rs1358519925 | genic_upstream_transcript_variant,2KB_upstream_variant,upstream_transcript_variant,intron_variant                       |
| rs1358595037 | genic_downstream_transcript_variant,intron_variant                                                                      |
| rs1358699390 | intron_variant                                                                                                          |
| rs1358701641 | intron_variant                                                                                                          |
| rs1358742985 | intron_variant                                                                                                          |
| rs1358780675 | intron_variant                                                                                                          |
| rs1358786712 | genic_upstream_transcript_variant,2KB_upstream_variant,upstream_transcript_variant,intron_variant                       |
| rs1358816923 | 500B_downstream_variant,downstream_transcript_variant                                                                   |
| rs1358836653 | genic_downstream_transcript_variant,intron_variant                                                                      |
| rs1358882208 | intron_variant                                                                                                          |
| rs1358892766 | intron_variant                                                                                                          |
| rs1358895258 | genic_upstream_transcript_variant,intron_variant                                                                        |
| rs1358896755 | genic_upstream_transcript_variant,intron_variant                                                                        |
| rs1358929536 | genic_upstream_transcript_variant,2KB_upstream_variant,upstream_transcript_variant,intron_variant                       |
| rs1358931345 | intron_variant                                                                                                          |

|              |                                                                                                   |
|--------------|---------------------------------------------------------------------------------------------------|
| rs1358938551 | intron_variant                                                                                    |
| rs1358961027 | intron_variant                                                                                    |
| rs1358961870 | genic_downstream_transcript_variant,intron_variant                                                |
| rs1358997308 | genic_downstream_transcript_variant,intron_variant                                                |
| rs1359019914 | genic_upstream_transcript_variant,intron_variant                                                  |
| rs1359046151 | genic_downstream_transcript_variant,intron_variant                                                |
| rs1359105842 | intron_variant                                                                                    |
| rs1359115935 | intron_variant                                                                                    |
| rs1359163244 | 2KB_upstream_variant,intron_variant,upstream_transcript_variant,genic_upstream_transcript_variant |
| rs1359200595 | intron_variant,genic_upstream_transcript_variant                                                  |
| rs1359208244 | intron_variant                                                                                    |
| rs1359316654 | intron_variant                                                                                    |
| rs1359341222 | intron_variant,genic_upstream_transcript_variant                                                  |
| rs1359366276 | intron_variant,genic_downstream_transcript_variant                                                |
| rs1359368382 | intron_variant,genic_upstream_transcript_variant                                                  |
| rs1359388735 | intron_variant                                                                                    |
| rs1359391569 | intron_variant,genic_downstream_transcript_variant                                                |
| rs1359407422 | intron_variant                                                                                    |
| rs1359451522 | intron_variant                                                                                    |
| rs1359474280 | intron_variant,genic_downstream_transcript_variant                                                |
| rs1359491678 | intron_variant                                                                                    |
| rs1359579263 | intron_variant                                                                                    |
| rs1359626495 | intron_variant,genic_downstream_transcript_variant                                                |
| rs1359644270 | intron_variant,genic_downstream_transcript_variant                                                |
| rs1359647855 | intron_variant,genic_upstream_transcript_variant                                                  |
| rs1359669586 | intron_variant                                                                                    |
| rs1359695332 | intron_variant,genic_upstream_transcript_variant                                                  |
| rs1359709779 | intron_variant,genic_downstream_transcript_variant                                                |
| rs1359736726 | intron_variant,genic_downstream_transcript_variant                                                |
| rs1359771462 | intron_variant                                                                                    |
| rs1359777694 | intron_variant,genic_downstream_transcript_variant                                                |
| rs1359809768 | intron_variant                                                                                    |
| rs1359826498 | intron_variant,genic_downstream_transcript_variant                                                |
| rs1359849508 | intron_variant,genic_upstream_transcript_variant                                                  |
| rs1359882487 | intron_variant,genic_downstream_transcript_variant                                                |
| rs1359940129 | intron_variant,genic_upstream_transcript_variant                                                  |
| rs1360035784 | intron_variant,genic_upstream_transcript_variant                                                  |
| rs1360043532 | intron_variant                                                                                    |
| rs1360048751 | intron_variant                                                                                    |
| rs1360065658 | intron_variant,genic_upstream_transcript_variant                                                  |
| rs1360092682 | intron_variant                                                                                    |
| rs1360109575 | intron_variant,genic_downstream_transcript_variant                                                |
| rs1360112268 | intron_variant,genic_upstream_transcript_variant                                                  |
| rs1360154886 | intron_variant,genic_upstream_transcript_variant                                                  |
| rs1360163644 | intron_variant,genic_upstream_transcript_variant                                                  |
| rs1360174387 | intron_variant,5_prime_UTR_variant,upstream_transcript_variant,genic_upstream_transcript_variant  |
| rs1360199227 | intron_variant,genic_downstream_transcript_variant                                                |
| rs1360225756 | intron_variant                                                                                    |
| rs1360287480 | intron_variant,genic_upstream_transcript_variant                                                  |
| rs1360364776 | intron_variant,genic_upstream_transcript_variant                                                  |
| rs1360374243 | 2KB_upstream_variant,intron_variant,upstream_transcript_variant,genic_upstream_transcript_variant |
| rs1360378472 | intron_variant,genic_upstream_transcript_variant                                                  |
| rs1360397403 | intron_variant                                                                                    |
| rs1360428765 | 2KB_upstream_variant,intron_variant,upstream_transcript_variant,genic_upstream_transcript_variant |
| rs1360446030 | intron_variant,genic_upstream_transcript_variant                                                  |
| rs1360454642 | intron_variant,genic_downstream_transcript_variant                                                |
| rs1360458852 | intron_variant,genic_downstream_transcript_variant                                                |
| rs1360463500 | intron_variant,genic_upstream_transcript_variant                                                  |
| rs1360485915 | intron_variant                                                                                    |
| rs1360490339 | intron_variant,genic_downstream_transcript_variant                                                |
| rs1360515898 | intron_variant,genic_upstream_transcript_variant                                                  |
| rs1360583011 | intron_variant                                                                                    |
| rs1360631133 | intron_variant,genic_downstream_transcript_variant                                                |
| rs1360640194 | intron_variant,genic_upstream_transcript_variant                                                  |
| rs1360685627 | intron_variant                                                                                    |
| rs1360688918 | intron_variant                                                                                    |
| rs1360743509 | intron_variant,genic_upstream_transcript_variant                                                  |
| rs1360751951 | intron_variant                                                                                    |
| rs1360762307 | intron_variant,genic_downstream_transcript_variant                                                |
| rs1360763384 | intron_variant                                                                                    |
| rs1360778929 | intron_variant                                                                                    |
| rs1360929240 | intron_variant,upstream_transcript_variant,genic_upstream_transcript_variant                      |
| rs1360947173 | intron_variant,genic_upstream_transcript_variant                                                  |
| rs1360951820 | intron_variant,upstream_transcript_variant,genic_upstream_transcript_variant                      |

|              |                                                                                                    |
|--------------|----------------------------------------------------------------------------------------------------|
| rs1361027837 | intron_variant,genic_upstream_transcript_variant                                                   |
| rs1361035455 | intron_variant                                                                                     |
| rs1361066921 | intron_variant                                                                                     |
| rs1361089276 | intron_variant,genic_upstream_transcript_variant                                                   |
| rs1361091037 | intron_variant                                                                                     |
| rs1361110969 | intron_variant,genic_upstream_transcript_variant                                                   |
| rs1361150862 | intron_variant,genic_upstream_transcript_variant                                                   |
| rs1361219309 | intron_variant                                                                                     |
| rs1361248622 | intron_variant,genic_upstream_transcript_variant                                                   |
| rs1361269530 | intron_variant,genic_upstream_transcript_variant                                                   |
| rs1361270771 | intron_variant,genic_upstream_transcript_variant                                                   |
| rs1361278684 | intron_variant                                                                                     |
| rs1361296945 | intron_variant,genic_upstream_transcript_variant                                                   |
| rs1361308704 | intron_variant                                                                                     |
| rs1361330351 | intron_variant,genic_upstream_transcript_variant                                                   |
| rs1361337132 | intron_variant,upstream_transcript_variant,genic_upstream_transcript_variant                       |
| rs1361337787 | 2KB_upstream_variant,intron_variant,upstream_transcript_variant,genic_upstream_transcript_variant  |
| rs1361419745 | intron_variant,genic_upstream_transcript_variant                                                   |
| rs1361444629 | intron_variant                                                                                     |
| rs1361472281 | intron_variant                                                                                     |
| rs1361475306 | intron_variant,genic_upstream_transcript_variant                                                   |
| rs1361492274 | intron_variant                                                                                     |
| rs1361506826 | intron_variant,genic_upstream_transcript_variant                                                   |
| rs1361517822 | intron_variant,genic_upstream_transcript_variant                                                   |
| rs1361532494 | intron_variant,genic_upstream_transcript_variant                                                   |
| rs1361535658 | intron_variant,genic_upstream_transcript_variant                                                   |
| rs1361629762 | intron_variant,genic_upstream_transcript_variant                                                   |
| rs1361647753 | intron_variant,genic_upstream_transcript_variant                                                   |
| rs1361706135 | intron_variant,genic_upstream_transcript_variant                                                   |
| rs1361706649 | intron_variant,genic_upstream_transcript_variant                                                   |
| rs1361708302 | 2KB_upstream_variant,intron_variant,upstream_transcript_variant,genic_upstream_transcript_variant  |
| rs1361719900 | intron_variant,genic_downstream_transcript_variant                                                 |
| rs1361734777 | intron_variant,genic_downstream_transcript_variant                                                 |
| rs1361736609 | intron_variant                                                                                     |
| rs1361765607 | intron_variant,genic_upstream_transcript_variant                                                   |
| rs1361780063 | intron_variant,genic_upstream_transcript_variant                                                   |
| rs1361822975 | intron_variant,genic_upstream_transcript_variant                                                   |
| rs1361892164 | downstream_transcript_variant,intron_variant,genic_downstream_transcript_variant                   |
| rs1361892520 | intron_variant                                                                                     |
| rs1361897994 | intron_variant                                                                                     |
| rs1361918117 | intron_variant,genic_upstream_transcript_variant                                                   |
| rs1361920501 | non_coding_transcript_variant,intron_variant,5_prime_UTR_variant,genic_upstream_transcript_variant |
| rs1361945217 | intron_variant                                                                                     |
| rs1361989102 | intron_variant,genic_upstream_transcript_variant                                                   |
| rs1362041289 | intron_variant                                                                                     |
| rs1362047178 | intron_variant,genic_upstream_transcript_variant                                                   |
| rs1362061922 | intron_variant,genic_upstream_transcript_variant                                                   |
| rs1362073137 | intron_variant                                                                                     |
| rs1362093141 | intron_variant                                                                                     |
| rs1362151522 | intron_variant                                                                                     |
| rs1362156913 | intron_variant                                                                                     |
| rs1362173994 | intron_variant,genic_downstream_transcript_variant                                                 |
| rs1362193937 | intron_variant                                                                                     |
| rs1362194917 | intron_variant                                                                                     |
| rs136222837  | intron_variant,genic_upstream_transcript_variant                                                   |
| rs1362238421 | intron_variant,genic_upstream_transcript_variant                                                   |
| rs1362260104 | intron_variant,genic_upstream_transcript_variant                                                   |
| rs1362261120 | intron_variant                                                                                     |
| rs1362282691 | intron_variant                                                                                     |
| rs1362302823 | intron_variant                                                                                     |
| rs1362329709 | intron_variant,genic_upstream_transcript_variant                                                   |
| rs1362396753 | intron_variant,genic_upstream_transcript_variant                                                   |
| rs1362397390 | intron_variant,genic_downstream_transcript_variant                                                 |
| rs1362399017 | intron_variant,genic_upstream_transcript_variant                                                   |
| rs1362413243 | intron_variant                                                                                     |
| rs1362430363 | intron_variant                                                                                     |
| rs1362450923 | intron_variant,genic_upstream_transcript_variant                                                   |
| rs1362455776 | intron_variant,genic_downstream_transcript_variant                                                 |
| rs1362487462 | intron_variant,genic_upstream_transcript_variant                                                   |
| rs1362506145 | intron_variant                                                                                     |
| rs1362553076 | intron_variant                                                                                     |
| rs1362573189 | non_coding_transcript_variant,3_prime_UTR_variant,genic_downstream_transcript_variant              |
| rs1362634590 | intron_variant,genic_upstream_transcript_variant                                                   |
| rs1362696590 | intron_variant,genic_upstream_transcript_variant                                                   |

|              |                                                                                                            |
|--------------|------------------------------------------------------------------------------------------------------------|
| rs1362733840 | non_coding_transcript_variant,coding_sequence_variant,genic_downstream_transcript_variant,missense_variant |
| rs1362749650 | intron_variant,genic_downstream_transcript_variant                                                         |
| rs1362753843 | intron_variant                                                                                             |
| rs1362755614 | intron_variant,genic_upstream_transcript_variant                                                           |
| rs1362760469 | intron_variant,genic_upstream_transcript_variant                                                           |
| rs1362772417 | intron_variant                                                                                             |
| rs1362808843 | intron_variant                                                                                             |
| rs1362826904 | intron_variant,upstream_transcript_variant,genic_upstream_transcript_variant                               |
| rs1362833635 | intron_variant,genic_downstream_transcript_variant                                                         |
| rs1362837000 | intron_variant,genic_downstream_transcript_variant                                                         |
| rs1362840337 | intron_variant,genic_upstream_transcript_variant                                                           |
| rs1362855388 | intron_variant,genic_upstream_transcript_variant                                                           |
| rs1362871634 | intron_variant,genic_upstream_transcript_variant                                                           |
| rs1362892500 | intron_variant,genic_downstream_transcript_variant                                                         |
| rs1362894661 | intron_variant,genic_upstream_transcript_variant                                                           |
| rs1362921039 | intron_variant,genic_downstream_transcript_variant                                                         |
| rs1362957984 | intron_variant,genic_upstream_transcript_variant                                                           |
| rs1362961325 | intron_variant,upstream_transcript_variant,genic_upstream_transcript_variant                               |
| rs1362971667 | intron_variant                                                                                             |
| rs1362975055 | intron_variant                                                                                             |
| rs1362991416 | intron_variant                                                                                             |
| rs1363059462 | intron_variant                                                                                             |
| rs1363079810 | intron_variant,genic_downstream_transcript_variant                                                         |
| rs1363094471 | intron_variant,genic_upstream_transcript_variant                                                           |
| rs1363132403 | intron_variant                                                                                             |
| rs1363167838 | intron_variant,genic_upstream_transcript_variant                                                           |
| rs1363174219 | non_coding_transcript_variant,3_prime_UTR_variant,genic_downstream_transcript_variant                      |
| rs1363187970 | intron_variant,upstream_transcript_variant,genic_upstream_transcript_variant                               |
| rs1363228387 | intron_variant                                                                                             |
| rs1363270849 | intron_variant,genic_downstream_transcript_variant                                                         |
| rs1363285731 | intron_variant,genic_upstream_transcript_variant                                                           |
| rs1363298049 | intron_variant,genic_downstream_transcript_variant                                                         |
| rs1363305196 | intron_variant                                                                                             |
| rs1363317955 | intron_variant,genic_downstream_transcript_variant                                                         |
| rs1363338722 | intron_variant                                                                                             |
| rs1363381487 | intron_variant                                                                                             |
| rs1363404466 | intron_variant,genic_upstream_transcript_variant                                                           |
| rs1363407146 | intron_variant                                                                                             |
| rs1363407857 | intron_variant,genic_downstream_transcript_variant                                                         |
| rs1363415748 | intron_variant,genic_upstream_transcript_variant                                                           |
| rs1363453444 | intron_variant,genic_downstream_transcript_variant                                                         |
| rs1363459579 | intron_variant,genic_downstream_transcript_variant                                                         |
| rs1363480238 | intron_variant,genic_downstream_transcript_variant                                                         |
| rs1363488734 | intron_variant,genic_upstream_transcript_variant                                                           |
| rs1363551867 | non_coding_transcript_variant,coding_sequence_variant,genic_downstream_transcript_variant,missense_variant |
| rs1363555277 | 2KB_upstream_variant,intron_variant,upstream_transcript_variant,genic_upstream_transcript_variant          |
| rs1363607564 | intron_variant                                                                                             |
| rs1363615406 | non_coding_transcript_variant,3_prime_UTR_variant,genic_downstream_transcript_variant                      |
| rs1363622189 | intron_variant                                                                                             |
| rs1363630057 | intron_variant                                                                                             |
| rs1363657408 | intron_variant,genic_upstream_transcript_variant                                                           |
| rs1363674169 | intron_variant,genic_downstream_transcript_variant                                                         |
| rs1363740793 | intron_variant                                                                                             |
| rs1363745227 | intron_variant,genic_upstream_transcript_variant                                                           |
| rs1363746282 | intron_variant                                                                                             |
| rs1363829911 | intron_variant,genic_upstream_transcript_variant                                                           |
| rs1363836105 | intron_variant                                                                                             |
| rs1363846362 | intron_variant,genic_downstream_transcript_variant                                                         |
| rs1363879382 | intron_variant,genic_upstream_transcript_variant                                                           |
| rs1363903287 | intron_variant                                                                                             |
| rs1363904084 | intron_variant,genic_upstream_transcript_variant                                                           |
| rs1363907450 | intron_variant,genic_downstream_transcript_variant                                                         |
| rs1363908236 | intron_variant,genic_upstream_transcript_variant                                                           |
| rs1363928898 | intron_variant,genic_upstream_transcript_variant                                                           |
| rs1364013265 | non_coding_transcript_variant,3_prime_UTR_variant,genic_downstream_transcript_variant                      |
| rs1364044303 | intron_variant                                                                                             |
| rs1364078897 | non_coding_transcript_variant,intron_variant,5_prime_UTR_variant,genic_upstream_transcript_variant         |
| rs1364087347 | intron_variant,genic_downstream_transcript_variant                                                         |
| rs1364105757 | intron_variant,genic_downstream_transcript_variant                                                         |
| rs1364107048 | intron_variant                                                                                             |
| rs1364138054 | 2KB_upstream_variant,intron_variant,upstream_transcript_variant,genic_upstream_transcript_variant          |
| rs1364158056 | intron_variant,genic_downstream_transcript_variant                                                         |
| rs1364167676 | intron_variant,genic_upstream_transcript_variant                                                           |
| rs1364174663 | intron_variant,genic_upstream_transcript_variant                                                           |

|              |                                                                                                  |
|--------------|--------------------------------------------------------------------------------------------------|
| rs1364186082 | intron_variant,genic_upstream_transcript_variant                                                 |
| rs1364195847 | intron_variant,genic_downstream_transcript_variant                                               |
| rs1364233542 | intron_variant                                                                                   |
| rs1364262437 | intron_variant                                                                                   |
| rs1364374480 | intron_variant,genic_upstream_transcript_variant                                                 |
| rs1364383095 | intron_variant                                                                                   |
| rs1364401199 | intron_variant,genic_upstream_transcript_variant                                                 |
| rs1364445964 | intron_variant                                                                                   |
| rs1364452469 | intron_variant                                                                                   |
| rs1364466436 | intron_variant,genic_downstream_transcript_variant                                               |
| rs1364512912 | intron_variant,genic_upstream_transcript_variant                                                 |
| rs1364514718 | intron_variant                                                                                   |
| rs1364575009 | intron_variant,genic_upstream_transcript_variant                                                 |
| rs1364604054 | intron_variant                                                                                   |
| rs1364632573 | intron_variant                                                                                   |
| rs1364657964 | intron_variant                                                                                   |
| rs1364660416 | intron_variant                                                                                   |
| rs1364670796 | intron_variant,genic_downstream_transcript_variant                                               |
| rs1364673162 | intron_variant,genic_upstream_transcript_variant                                                 |
| rs1364704304 | intron_variant,genic_downstream_transcript_variant                                               |
| rs1364738119 | intron_variant                                                                                   |
| rs1364840261 | intron_variant,genic_upstream_transcript_variant                                                 |
| rs1364840315 | intron_variant                                                                                   |
| rs1364853579 | intron_variant,genic_upstream_transcript_variant                                                 |
| rs1364874358 | intron_variant,genic_downstream_transcript_variant                                               |
| rs1364881839 | intron_variant,genic_upstream_transcript_variant                                                 |
| rs1364892164 | intron_variant                                                                                   |
| rs1364901697 | intron_variant,upstream_transcript_variant,genic_upstream_transcript_variant                     |
| rs1364911262 | intron_variant,upstream_transcript_variant,genic_upstream_transcript_variant                     |
| rs1364984780 | intron_variant                                                                                   |
| rs1365027826 | downstream_transcript_variant,500B_downstream_variant                                            |
| rs1365041543 | intron_variant                                                                                   |
| rs1365145003 | intron_variant                                                                                   |
| rs1365147395 | intron_variant                                                                                   |
| rs1365181482 | intron_variant                                                                                   |
| rs1365199940 | intron_variant,genic_upstream_transcript_variant                                                 |
| rs1365232016 | intron_variant,upstream_transcript_variant,genic_upstream_transcript_variant                     |
| rs1365247381 | non_coding_transcript_variant,3_prime_UTR_variant,genic_downstream_transcript_variant            |
| rs1365257046 | intron_variant                                                                                   |
| rs1365316645 | intron_variant,genic_upstream_transcript_variant                                                 |
| rs1365318926 | intron_variant,genic_upstream_transcript_variant                                                 |
| rs1365355100 | intron_variant,genic_upstream_transcript_variant                                                 |
| rs1365429263 | intron_variant                                                                                   |
| rs1365463670 | intron_variant,5_prime_UTR_variant,upstream_transcript_variant,genic_upstream_transcript_variant |
| rs1365483013 | intron_variant,genic_upstream_transcript_variant                                                 |
| rs1365527871 | non_coding_transcript_variant,3_prime_UTR_variant,genic_downstream_transcript_variant            |
| rs1365553431 | intron_variant,genic_upstream_transcript_variant                                                 |
| rs1365575797 | intron_variant,genic_downstream_transcript_variant                                               |
| rs1365594274 | intron_variant,genic_upstream_transcript_variant                                                 |
| rs1365620989 | intron_variant                                                                                   |
| rs1365626671 | intron_variant,genic_upstream_transcript_variant                                                 |
| rs1365670296 | intron_variant,genic_upstream_transcript_variant                                                 |
| rs1365704453 | intron_variant                                                                                   |
| rs1365713264 | intron_variant,genic_upstream_transcript_variant                                                 |
| rs1365722517 | intron_variant                                                                                   |
| rs1365824239 | intron_variant                                                                                   |
| rs1365842286 | intron_variant,genic_upstream_transcript_variant                                                 |
| rs1365852417 | intron_variant,genic_upstream_transcript_variant                                                 |
| rs1365862418 | intron_variant                                                                                   |
| rs1365888853 | intron_variant,genic_upstream_transcript_variant                                                 |
| rs1365892586 | intron_variant                                                                                   |
| rs1365900739 | intron_variant                                                                                   |
| rs1365903813 | intron_variant,genic_downstream_transcript_variant                                               |
| rs1366013346 | intron_variant                                                                                   |
| rs1366019118 | intron_variant,genic_upstream_transcript_variant                                                 |
| rs1366023349 | intron_variant,genic_upstream_transcript_variant                                                 |
| rs1366037692 | intron_variant,genic_upstream_transcript_variant                                                 |
| rs1366089678 | intron_variant,genic_upstream_transcript_variant                                                 |
| rs1366142852 | intron_variant,genic_downstream_transcript_variant                                               |
| rs1366143829 | intron_variant,genic_downstream_transcript_variant                                               |
| rs1366206974 | intron_variant,genic_upstream_transcript_variant                                                 |
| rs1366217435 | intron_variant                                                                                   |
| rs1366233668 | intron_variant,genic_upstream_transcript_variant                                                 |
| rs1366261191 | intron_variant                                                                                   |

|              |                                                                                                            |
|--------------|------------------------------------------------------------------------------------------------------------|
| rs1366271957 | intron_variant,genic_upstream_transcript_variant                                                           |
| rs1366299317 | intron_variant                                                                                             |
| rs1366339845 | intron_variant,genic_upstream_transcript_variant                                                           |
| rs1366371634 | intron_variant                                                                                             |
| rs1366382102 | intron_variant,genic_downstream_transcript_variant                                                         |
| rs1366386319 | non_coding_transcript_variant,3_prime_UTR_variant,genic_downstream_transcript_variant                      |
| rs1366412643 | intron_variant,genic_downstream_transcript_variant                                                         |
| rs1366434391 | intron_variant                                                                                             |
| rs1366439375 | intron_variant,upstream_transcript_variant,genic_upstream_transcript_variant                               |
| rs1366491336 | intron_variant,genic_downstream_transcript_variant                                                         |
| rs1366504099 | intron_variant                                                                                             |
| rs1366532563 | intron_variant                                                                                             |
| rs1366572835 | intron_variant,genic_downstream_transcript_variant                                                         |
| rs1366610729 | intron_variant                                                                                             |
| rs1366651413 | non_coding_transcript_variant,intron_variant,genic_upstream_transcript_variant                             |
| rs1366709635 | intron_variant                                                                                             |
| rs1366758311 | intron_variant,genic_downstream_transcript_variant                                                         |
| rs1366772847 | intron_variant                                                                                             |
| rs1366786920 | intron_variant,genic_downstream_transcript_variant                                                         |
| rs1366786989 | intron_variant,genic_upstream_transcript_variant                                                           |
| rs1366787704 | 2KB_upstream_variant,intron_variant,upstream_transcript_variant,genic_upstream_transcript_variant          |
| rs1366859625 | intron_variant                                                                                             |
| rs1366869336 | intron_variant,genic_upstream_transcript_variant                                                           |
| rs1366869622 | intron_variant                                                                                             |
| rs1366884873 | intron_variant                                                                                             |
| rs1366911287 | intron_variant,genic_upstream_transcript_variant                                                           |
| rs1366983833 | intron_variant                                                                                             |
| rs1366989926 | intron_variant                                                                                             |
| rs1367014839 | intron_variant                                                                                             |
| rs1367023592 | intron_variant,genic_downstream_transcript_variant                                                         |
| rs1367025713 | intron_variant                                                                                             |
| rs1367057073 | intron_variant,genic_upstream_transcript_variant                                                           |
| rs1367146285 | intron_variant                                                                                             |
| rs1367179408 | intron_variant,genic_downstream_transcript_variant                                                         |
| rs1367181978 | intron_variant,upstream_transcript_variant,genic_upstream_transcript_variant                               |
| rs1367193572 | intron_variant                                                                                             |
| rs1367265974 | intron_variant,genic_upstream_transcript_variant                                                           |
| rs1367341975 | non_coding_transcript_variant,coding_sequence_variant,missense_variant                                     |
| rs1367355932 | intron_variant                                                                                             |
| rs1367361175 | intron_variant,genic_upstream_transcript_variant                                                           |
| rs1367400410 | intron_variant,genic_downstream_transcript_variant                                                         |
| rs1367439751 | intron_variant                                                                                             |
| rs1367445940 | non_coding_transcript_variant,coding_sequence_variant,genic_downstream_transcript_variant,missense_variant |
| rs1367476221 | intron_variant,upstream_transcript_variant,genic_upstream_transcript_variant                               |
| rs1367545990 | intron_variant,upstream_transcript_variant,genic_upstream_transcript_variant                               |
| rs1367602352 | intron_variant                                                                                             |
| rs1367610633 | intron_variant,genic_downstream_transcript_variant                                                         |
| rs1367611089 | intron_variant                                                                                             |
| rs1367732239 | intron_variant                                                                                             |
| rs1367898321 | intron_variant,genic_downstream_transcript_variant                                                         |
| rs1367907241 | intron_variant,genic_upstream_transcript_variant                                                           |
| rs1367940410 | intron_variant                                                                                             |
| rs1367967180 | 2KB_upstream_variant,intron_variant,upstream_transcript_variant,genic_upstream_transcript_variant          |
| rs1367973414 | intron_variant,genic_downstream_transcript_variant                                                         |
| rs1367989115 | intron_variant,genic_upstream_transcript_variant                                                           |
| rs1368074439 | intron_variant,genic_upstream_transcript_variant                                                           |
| rs1368081463 | intron_variant,genic_upstream_transcript_variant                                                           |
| rs1368125590 | intron_variant,genic_downstream_transcript_variant                                                         |
| rs1368132939 | intron_variant,upstream_transcript_variant,genic_upstream_transcript_variant                               |
| rs1368158199 | intron_variant,genic_upstream_transcript_variant                                                           |
| rs1368247515 | intron_variant,genic_upstream_transcript_variant                                                           |
| rs1368256648 | intron_variant,genic_downstream_transcript_variant                                                         |
| rs1368257141 | intron_variant                                                                                             |
| rs1368314422 | intron_variant                                                                                             |
| rs1368320405 | intron_variant,genic_upstream_transcript_variant                                                           |
| rs1368363729 | intron_variant,genic_downstream_transcript_variant                                                         |
| rs1368384947 | intron_variant                                                                                             |
| rs1368385665 | intron_variant                                                                                             |
| rs1368400781 | non_coding_transcript_variant,3_prime_UTR_variant,genic_downstream_transcript_variant                      |
| rs1368427645 | intron_variant,genic_upstream_transcript_variant                                                           |
| rs1368457474 | intron_variant,genic_upstream_transcript_variant                                                           |
| rs1368457713 | intron_variant                                                                                             |
| rs1368494690 | intron_variant,genic_upstream_transcript_variant                                                           |
| rs1368574297 | intron_variant                                                                                             |

|              |                                                                                                   |
|--------------|---------------------------------------------------------------------------------------------------|
| rs1368645027 | intron_variant,genic_upstream_transcript_variant                                                  |
| rs1368661115 | non_coding_transcript_variant,3_prime_UTR_variant,genic_downstream_transcript_variant             |
| rs1368680418 | non_coding_transcript_variant,inframe_deletion,coding_sequence_variant                            |
| rs1368690531 | intron_variant                                                                                    |
| rs1368694040 | intron_variant,genic_upstream_transcript_variant                                                  |
| rs1368727869 | intron_variant,upstream_transcript_variant,genic_upstream_transcript_variant                      |
| rs1368751471 | intron_variant                                                                                    |
| rs1368769976 | intron_variant                                                                                    |
| rs1368842975 | intron_variant,upstream_transcript_variant,genic_upstream_transcript_variant                      |
| rs1368869286 | intron_variant,genic_upstream_transcript_variant                                                  |
| rs1368943546 | intron_variant                                                                                    |
| rs1368960165 | intron_variant                                                                                    |
| rs1368962307 | intron_variant,5_prime_UTR_variant                                                                |
| rs1368982280 | intron_variant,genic_upstream_transcript_variant                                                  |
| rs1368999898 | intron_variant,genic_upstream_transcript_variant                                                  |
| rs1369012275 | intron_variant                                                                                    |
| rs1369064578 | intron_variant                                                                                    |
| rs1369103898 | intron_variant,genic_upstream_transcript_variant                                                  |
| rs1369128339 | intron_variant,genic_upstream_transcript_variant                                                  |
| rs1369143697 | intron_variant,genic_upstream_transcript_variant                                                  |
| rs1369148680 | intron_variant,genic_upstream_transcript_variant                                                  |
| rs1369255277 | intron_variant,genic_downstream_transcript_variant                                                |
| rs1369283076 | intron_variant,genic_downstream_transcript_variant                                                |
| rs1369291785 | intron_variant                                                                                    |
| rs1369342547 | intron_variant,genic_upstream_transcript_variant                                                  |
| rs1369356488 | intron_variant,genic_upstream_transcript_variant                                                  |
| rs1369374871 | 2KB_upstream_variant,intron_variant,upstream_transcript_variant,genic_upstream_transcript_variant |
| rs1369390754 | intron_variant                                                                                    |
| rs1369400081 | intron_variant,genic_upstream_transcript_variant                                                  |
| rs1369409711 | intron_variant                                                                                    |
| rs1369412980 | intron_variant                                                                                    |
| rs1369423040 | intron_variant,genic_upstream_transcript_variant                                                  |
| rs1369434773 | intron_variant                                                                                    |
| rs1369443353 | intron_variant,genic_upstream_transcript_variant                                                  |
| rs1369469600 | intron_variant,genic_upstream_transcript_variant                                                  |
| rs1369508214 | intron_variant                                                                                    |
| rs1369520786 | intron_variant                                                                                    |
| rs1369556062 | intron_variant,genic_upstream_transcript_variant                                                  |
| rs1369599475 | intron_variant,genic_upstream_transcript_variant                                                  |
| rs1369656655 | intron_variant,genic_downstream_transcript_variant                                                |
| rs1369664635 | intron_variant,genic_downstream_transcript_variant                                                |
| rs1369677018 | intron_variant,genic_upstream_transcript_variant                                                  |
| rs1369681283 | intron_variant                                                                                    |
| rs1369682603 | intron_variant                                                                                    |
| rs1369697945 | intron_variant,genic_downstream_transcript_variant                                                |
| rs1369708675 | intron_variant                                                                                    |
| rs1369763148 | intron_variant,genic_downstream_transcript_variant                                                |
| rs1369783203 | intron_variant                                                                                    |
| rs1369815398 | intron_variant,genic_downstream_transcript_variant                                                |
| rs1369847550 | intron_variant,genic_upstream_transcript_variant                                                  |
| rs1369868054 | intron_variant,genic_upstream_transcript_variant                                                  |
| rs1369880264 | intron_variant                                                                                    |
| rs1369908914 | intron_variant                                                                                    |
| rs1369919389 | non_coding_transcript_variant,3_prime_UTR_variant,genic_downstream_transcript_variant             |
| rs1369923464 | intron_variant                                                                                    |
| rs1369933377 | intron_variant,genic_upstream_transcript_variant                                                  |
| rs1369943321 | intron_variant,genic_upstream_transcript_variant                                                  |
| rs1369967347 | intron_variant,upstream_transcript_variant,genic_upstream_transcript_variant                      |
| rs1369974663 | intron_variant,genic_downstream_transcript_variant                                                |
| rs1369989994 | intron_variant                                                                                    |
| rs1370003550 | intron_variant                                                                                    |
| rs1370010879 | intron_variant,genic_upstream_transcript_variant                                                  |
| rs1370013844 | intron_variant,genic_upstream_transcript_variant                                                  |
| rs1370049185 | intron_variant                                                                                    |
| rs1370049783 | intron_variant                                                                                    |
| rs1370053350 | intron_variant,genic_upstream_transcript_variant                                                  |
| rs1370069359 | intron_variant,genic_upstream_transcript_variant                                                  |
| rs1370085403 | intron_variant,genic_upstream_transcript_variant                                                  |
| rs1370114971 | intron_variant,genic_upstream_transcript_variant                                                  |
| rs1370119775 | intron_variant,genic_upstream_transcript_variant                                                  |
| rs1370194133 | intron_variant,genic_downstream_transcript_variant                                                |
| rs1370216511 | intron_variant,genic_upstream_transcript_variant                                                  |
| rs1370236717 | intron_variant                                                                                    |
| rs1370263448 | intron_variant,genic_downstream_transcript_variant                                                |

|              |                                                                                                              |
|--------------|--------------------------------------------------------------------------------------------------------------|
| rs1370281596 | intron_variant                                                                                               |
| rs1370291128 | intron_variant                                                                                               |
| rs1370293957 | intron_variant,genic_upstream_transcript_variant                                                             |
| rs1370311784 | intron_variant,genic_upstream_transcript_variant                                                             |
| rs1370379159 | intron_variant,genic_downstream_transcript_variant                                                           |
| rs1370406622 | intron_variant,genic_downstream_transcript_variant                                                           |
| rs1370425021 | intron_variant,genic_upstream_transcript_variant                                                             |
| rs1370427039 | intron_variant                                                                                               |
| rs1370468279 | intron_variant,genic_upstream_transcript_variant                                                             |
| rs1370504408 | intron_variant                                                                                               |
| rs1370511341 | intron_variant,genic_downstream_transcript_variant                                                           |
| rs1370520372 | intron_variant,genic_downstream_transcript_variant                                                           |
| rs1370532745 | intron_variant,genic_upstream_transcript_variant                                                             |
| rs1370541728 | intron_variant                                                                                               |
| rs1370551641 | intron_variant                                                                                               |
| rs1370566545 | intron_variant                                                                                               |
| rs1370588027 | intron_variant,genic_upstream_transcript_variant                                                             |
| rs1370609151 | non_coding_transcript_variant,3_prime_UTR_variant,genic_downstream_transcript_variant                        |
| rs1370635970 | intron_variant                                                                                               |
| rs1370646414 | intron_variant                                                                                               |
| rs1370682898 | intron_variant                                                                                               |
| rs1370706402 | downstream_transcript_variant,intron_variant,genic_downstream_transcript_variant                             |
| rs1370748602 | intron_variant,genic_downstream_transcript_variant                                                           |
| rs1370789845 | intron_variant,genic_upstream_transcript_variant                                                             |
| rs1370790729 | intron_variant,upstream_transcript_variant,genic_upstream_transcript_variant                                 |
| rs1370807718 | intron_variant,genic_downstream_transcript_variant                                                           |
| rs1370834057 | intron_variant,genic_upstream_transcript_variant                                                             |
| rs1370840781 | intron_variant                                                                                               |
| rs1370855258 | non_coding_transcript_variant,coding_sequence_variant,synonymous_variant,genic_downstream_transcript_variant |
| rs1370891482 | intron_variant,genic_downstream_transcript_variant                                                           |
| rs1370899692 | intron_variant                                                                                               |
| rs1370923210 | intron_variant,genic_downstream_transcript_variant                                                           |
| rs1371026058 | intron_variant                                                                                               |
| rs1371090559 | intron_variant                                                                                               |
| rs1371095616 | intron_variant                                                                                               |
| rs1371139971 | intron_variant,genic_upstream_transcript_variant                                                             |
| rs1371205146 | intron_variant,genic_downstream_transcript_variant                                                           |
| rs1371206531 | intron_variant                                                                                               |
| rs1371207580 | intron_variant                                                                                               |
| rs1371218739 | intron_variant,genic_upstream_transcript_variant                                                             |
| rs1371253610 | intron_variant,genic_upstream_transcript_variant                                                             |
| rs1371280427 | intron_variant                                                                                               |
| rs1371350150 | intron_variant,genic_upstream_transcript_variant                                                             |
| rs1371352384 | intron_variant                                                                                               |
| rs1371381262 | intron_variant,genic_upstream_transcript_variant                                                             |
| rs1371390093 | intron_variant,genic_upstream_transcript_variant                                                             |
| rs1371411761 | intron_variant,genic_upstream_transcript_variant                                                             |
| rs1371450346 | intron_variant                                                                                               |
| rs1371460318 | intron_variant,genic_downstream_transcript_variant                                                           |
| rs1371468240 | intron_variant,genic_upstream_transcript_variant                                                             |
| rs1371490564 | intron_variant,genic_upstream_transcript_variant                                                             |
| rs1371491181 | intron_variant                                                                                               |
| rs1371492877 | intron_variant,genic_downstream_transcript_variant                                                           |
| rs1371552809 | intron_variant                                                                                               |
| rs1371557285 | intron_variant,genic_upstream_transcript_variant                                                             |
| rs1371585799 | intron_variant,genic_upstream_transcript_variant                                                             |
| rs1371628015 | intron_variant,genic_upstream_transcript_variant                                                             |
| rs1371648494 | intron_variant                                                                                               |
| rs1371665284 | intron_variant,genic_upstream_transcript_variant                                                             |
| rs1371676232 | genic_downstream_transcript_variant,intron_variant                                                           |
| rs1371678871 | intron_variant,genic_upstream_transcript_variant                                                             |
| rs1371685556 | intron_variant                                                                                               |
| rs1371722654 | intron_variant                                                                                               |
| rs1371729816 | upstream_transcript_variant,intron_variant,genic_upstream_transcript_variant                                 |
| rs1371779101 | intron_variant,genic_upstream_transcript_variant                                                             |
| rs1371807236 | genic_downstream_transcript_variant,intron_variant                                                           |
| rs1371807876 | genic_downstream_transcript_variant,intron_variant                                                           |
| rs1371821200 | intron_variant                                                                                               |
| rs1371851556 | intron_variant,genic_upstream_transcript_variant                                                             |
| rs1371861635 | intron_variant,genic_upstream_transcript_variant                                                             |
| rs1371876837 | intron_variant,genic_upstream_transcript_variant                                                             |
| rs1371920139 | upstream_transcript_variant,intron_variant,genic_upstream_transcript_variant                                 |
| rs1371935134 | intron_variant,genic_upstream_transcript_variant                                                             |
| rs1371943770 | genic_downstream_transcript_variant,downstream_transcript_variant,intron_variant                             |

|              |                                                                                                   |
|--------------|---------------------------------------------------------------------------------------------------|
| rs1371951530 | intron_variant,genic_upstream_transcript_variant                                                  |
| rs1371978397 | genic_downstream_transcript_variant,intron_variant                                                |
| rs1371979702 | intron_variant                                                                                    |
| rs1371988996 | genic_downstream_transcript_variant,intron_variant                                                |
| rs1372038331 | intron_variant,genic_upstream_transcript_variant                                                  |
| rs1372085194 | downstream_transcript_variant,500B_downstream_variant                                             |
| rs1372126450 | intron_variant                                                                                    |
| rs1372130338 | intron_variant,genic_upstream_transcript_variant                                                  |
| rs1372155627 | intron_variant                                                                                    |
| rs1372172783 | genic_downstream_transcript_variant,intron_variant                                                |
| rs1372217838 | intron_variant                                                                                    |
| rs1372219444 | intron_variant,genic_upstream_transcript_variant                                                  |
| rs1372228539 | intron_variant,genic_upstream_transcript_variant                                                  |
| rs1372250842 | intron_variant,genic_upstream_transcript_variant                                                  |
| rs1372289422 | genic_downstream_transcript_variant,intron_variant                                                |
| rs1372346877 | intron_variant,genic_upstream_transcript_variant                                                  |
| rs1372414421 | intron_variant                                                                                    |
| rs1372418348 | intron_variant,genic_upstream_transcript_variant                                                  |
| rs1372432962 | intron_variant,genic_upstream_transcript_variant                                                  |
| rs1372436116 | intron_variant                                                                                    |
| rs1372459548 | genic_downstream_transcript_variant,intron_variant                                                |
| rs1372532963 | genic_downstream_transcript_variant,intron_variant                                                |
| rs1372552457 | intron_variant                                                                                    |
| rs1372559700 | genic_downstream_transcript_variant,intron_variant                                                |
| rs1372615127 | genic_downstream_transcript_variant,intron_variant                                                |
| rs1372696396 | missense_variant,coding_sequence_variant,non_coding_transcript_variant                            |
| rs1372788928 | intron_variant                                                                                    |
| rs1372910112 | intron_variant,genic_upstream_transcript_variant                                                  |
| rs1372951429 | intron_variant                                                                                    |
| rs1372959330 | intron_variant                                                                                    |
| rs1372972001 | intron_variant                                                                                    |
| rs1373024154 | intron_variant,genic_upstream_transcript_variant                                                  |
| rs1373034124 | intron_variant,genic_upstream_transcript_variant                                                  |
| rs1373042634 | 2KB_upstream_variant,upstream_transcript_variant,intron_variant,genic_upstream_transcript_variant |
| rs1373068448 | intron_variant                                                                                    |
| rs1373087651 | genic_downstream_transcript_variant,intron_variant                                                |
| rs1373108302 | 2KB_upstream_variant,upstream_transcript_variant,intron_variant,genic_upstream_transcript_variant |
| rs1373190244 | 2KB_upstream_variant,upstream_transcript_variant,intron_variant,genic_upstream_transcript_variant |
| rs1373257360 | intron_variant,genic_upstream_transcript_variant                                                  |
| rs1373269653 | genic_downstream_transcript_variant,intron_variant                                                |
| rs1373280142 | genic_downstream_transcript_variant,intron_variant                                                |
| rs1373306317 | intron_variant,genic_upstream_transcript_variant                                                  |
| rs1373348674 | intron_variant                                                                                    |
| rs1373351272 | intron_variant                                                                                    |
| rs1373363424 | genic_downstream_transcript_variant,intron_variant                                                |
| rs1373369191 | intron_variant,genic_upstream_transcript_variant                                                  |
| rs1373404177 | intron_variant                                                                                    |
| rs1373410581 | intron_variant,genic_upstream_transcript_variant                                                  |
| rs1373477924 | intron_variant                                                                                    |
| rs1373483244 | intron_variant,genic_upstream_transcript_variant                                                  |
| rs1373500417 | genic_downstream_transcript_variant,intron_variant                                                |
| rs1373517938 | intron_variant                                                                                    |
| rs1373518888 | intron_variant,genic_upstream_transcript_variant                                                  |
| rs1373570802 | intron_variant                                                                                    |
| rs1373572705 | intron_variant,genic_upstream_transcript_variant                                                  |
| rs1373597317 | intron_variant                                                                                    |
| rs1373617852 | intron_variant,genic_upstream_transcript_variant                                                  |
| rs1373708712 | intron_variant                                                                                    |
| rs1373744613 | genic_downstream_transcript_variant,intron_variant                                                |
| rs1373756273 | intron_variant,genic_upstream_transcript_variant                                                  |
| rs1373890647 | intron_variant,genic_upstream_transcript_variant                                                  |
| rs1373906478 | intron_variant,genic_upstream_transcript_variant                                                  |
| rs1373932887 | genic_downstream_transcript_variant,intron_variant                                                |
| rs1373992313 | intron_variant,genic_upstream_transcript_variant                                                  |
| rs1374003952 | intron_variant,genic_upstream_transcript_variant                                                  |
| rs1374030949 | intron_variant                                                                                    |
| rs1374048736 | intron_variant,genic_upstream_transcript_variant                                                  |
| rs1374071771 | genic_downstream_transcript_variant,intron_variant                                                |
| rs1374098076 | intron_variant                                                                                    |
| rs1374151019 | upstream_transcript_variant,intron_variant,genic_upstream_transcript_variant                      |
| rs1374214693 | intron_variant,genic_upstream_transcript_variant                                                  |
| rs1374222095 | intron_variant,genic_upstream_transcript_variant                                                  |
| rs1374232333 | intron_variant,genic_upstream_transcript_variant                                                  |
| rs1374252907 | intron_variant                                                                                    |

|              |                                                                                                   |
|--------------|---------------------------------------------------------------------------------------------------|
| rs1374261878 | intron_variant,genic_upstream_transcript_variant                                                  |
| rs1374264056 | genic_downstream_transcript_variant,intron_variant                                                |
| rs1374266810 | intron_variant                                                                                    |
| rs1374285814 | intron_variant,genic_upstream_transcript_variant                                                  |
| rs1374289416 | intron_variant,genic_upstream_transcript_variant                                                  |
| rs1374300579 | genic_downstream_transcript_variant,intron_variant                                                |
| rs1374388546 | intron_variant,genic_upstream_transcript_variant                                                  |
| rs1374398138 | intron_variant                                                                                    |
| rs1374413099 | synonymous_variant,coding_sequence_variant,non_coding_transcript_variant                          |
| rs1374417266 | 2KB_upstream_variant,upstream_transcript_variant,intron_variant,genic_upstream_transcript_variant |
| rs1374448254 | intron_variant                                                                                    |
| rs1374480042 | intron_variant                                                                                    |
| rs1374486100 | genic_downstream_transcript_variant,intron_variant                                                |
| rs1374515462 | genic_downstream_transcript_variant,intron_variant                                                |
| rs1374557011 | intron_variant                                                                                    |
| rs1374578858 | intron_variant                                                                                    |
| rs1374587949 | intron_variant,genic_upstream_transcript_variant                                                  |
| rs1374608036 | intron_variant,genic_upstream_transcript_variant                                                  |
| rs1374612216 | intron_variant                                                                                    |
| rs1374647966 | intron_variant,genic_upstream_transcript_variant                                                  |
| rs1374650199 | intron_variant,genic_upstream_transcript_variant                                                  |
| rs1374724128 | missense_variant,coding_sequence_variant,non_coding_transcript_variant                            |
| rs1374731264 | intron_variant,genic_upstream_transcript_variant                                                  |
| rs1374760604 | genic_downstream_transcript_variant,intron_variant                                                |
| rs1374794377 | intron_variant,genic_upstream_transcript_variant                                                  |
| rs1374864020 | intron_variant,genic_upstream_transcript_variant                                                  |
| rs1374906726 | intron_variant,genic_upstream_transcript_variant                                                  |
| rs1374942869 | 2KB_upstream_variant,upstream_transcript_variant,intron_variant,genic_upstream_transcript_variant |
| rs1374949048 | intron_variant                                                                                    |
| rs1374980331 | intron_variant                                                                                    |
| rs1374984200 | intron_variant                                                                                    |
| rs1375005774 | intron_variant,genic_upstream_transcript_variant                                                  |
| rs1375020631 | intron_variant,genic_upstream_transcript_variant                                                  |
| rs1375021820 | intron_variant,genic_upstream_transcript_variant                                                  |
| rs1375036015 | 2KB_upstream_variant,upstream_transcript_variant,intron_variant,genic_upstream_transcript_variant |
| rs1375077277 | intron_variant,genic_upstream_transcript_variant                                                  |
| rs1375094044 | intron_variant                                                                                    |
| rs1375097448 | intron_variant                                                                                    |
| rs1375104668 | intron_variant,genic_upstream_transcript_variant                                                  |
| rs1375143791 | intron_variant,genic_upstream_transcript_variant                                                  |
| rs1375151564 | upstream_transcript_variant,5_prime_UTR_variant,intron_variant,genic_upstream_transcript_variant  |
| rs1375243367 | intron_variant,genic_upstream_transcript_variant                                                  |
| rs1375245061 | intron_variant,genic_upstream_transcript_variant                                                  |
| rs1375263433 | intron_variant                                                                                    |
| rs1375285399 | intron_variant                                                                                    |
| rs1375312481 | intron_variant                                                                                    |
| rs1375321543 | intron_variant                                                                                    |
| rs1375324383 | intron_variant,genic_upstream_transcript_variant                                                  |
| rs1375324943 | genic_downstream_transcript_variant,intron_variant                                                |
| rs1375326249 | genic_downstream_transcript_variant,intron_variant                                                |
| rs1375386318 | intron_variant                                                                                    |
| rs1375410603 | intron_variant,genic_upstream_transcript_variant                                                  |
| rs1375414969 | genic_downstream_transcript_variant,intron_variant                                                |
| rs1375431225 | genic_downstream_transcript_variant,intron_variant                                                |
| rs1375447901 | intron_variant                                                                                    |
| rs1375470594 | intron_variant,genic_upstream_transcript_variant                                                  |
| rs1375517431 | intron_variant                                                                                    |
| rs1375546924 | intron_variant,genic_upstream_transcript_variant                                                  |
| rs1375557409 | intron_variant                                                                                    |
| rs1375598587 | intron_variant                                                                                    |
| rs1375601004 | genic_downstream_transcript_variant,intron_variant                                                |
| rs1375626272 | 2KB_upstream_variant,upstream_transcript_variant,intron_variant,genic_upstream_transcript_variant |
| rs1375630353 | intron_variant                                                                                    |
| rs1375697888 | genic_downstream_transcript_variant,intron_variant                                                |
| rs1375756677 | genic_downstream_transcript_variant,intron_variant                                                |
| rs1375779234 | 2KB_upstream_variant,upstream_transcript_variant,intron_variant,genic_upstream_transcript_variant |
| rs1375784135 | intron_variant                                                                                    |
| rs1375877141 | intron_variant,genic_upstream_transcript_variant                                                  |
| rs1375898640 | intron_variant                                                                                    |
| rs1375953145 | intron_variant                                                                                    |
| rs1376082003 | intron_variant,genic_upstream_transcript_variant                                                  |
| rs1376106698 | intron_variant                                                                                    |
| rs1376154338 | 2KB_upstream_variant,upstream_transcript_variant,intron_variant,genic_upstream_transcript_variant |
| rs1376167889 | genic_downstream_transcript_variant,intron_variant                                                |

|              |                                                                                                                         |
|--------------|-------------------------------------------------------------------------------------------------------------------------|
| rs1376175981 | intron_variant,genic_upstream_transcript_variant                                                                        |
| rs1376177102 | intron_variant                                                                                                          |
| rs1376194619 | genic_downstream_transcript_variant,intron_variant                                                                      |
| rs1376206586 | intron_variant                                                                                                          |
| rs1376215900 | 2KB_upstream_variant,upstream_transcript_variant,intron_variant,genic_upstream_transcript_variant                       |
| rs1376220905 | intron_variant                                                                                                          |
| rs1376270659 | intron_variant,genic_upstream_transcript_variant                                                                        |
| rs1376295165 | intron_variant,genic_upstream_transcript_variant                                                                        |
| rs1376309242 | intron_variant,genic_upstream_transcript_variant                                                                        |
| rs1376356507 | intron_variant,genic_upstream_transcript_variant                                                                        |
| rs1376390374 | upstream_transcript_variant,intron_variant,genic_upstream_transcript_variant                                            |
| rs1376499542 | genic_downstream_transcript_variant,intron_variant                                                                      |
| rs1376504059 | intron_variant,genic_upstream_transcript_variant                                                                        |
| rs1376517293 | intron_variant,genic_upstream_transcript_variant                                                                        |
| rs1376518172 | intron_variant                                                                                                          |
| rs1376606159 | 2KB_upstream_variant,upstream_transcript_variant,intron_variant,genic_upstream_transcript_variant                       |
| rs1376607159 | intron_variant                                                                                                          |
| rs1376608086 | intron_variant,genic_upstream_transcript_variant                                                                        |
| rs1376647769 | intron_variant                                                                                                          |
| rs1376666962 | intron_variant                                                                                                          |
| rs1376678961 | intron_variant,genic_upstream_transcript_variant                                                                        |
| rs1376687119 | intron_variant,genic_upstream_transcript_variant                                                                        |
| rs1376691488 | intron_variant                                                                                                          |
| rs1376726227 | intron_variant,genic_upstream_transcript_variant                                                                        |
| rs1376782616 | intron_variant                                                                                                          |
| rs1376824178 | intron_variant,genic_upstream_transcript_variant                                                                        |
| rs1376879216 | intron_variant                                                                                                          |
| rs1376885201 | intron_variant,genic_upstream_transcript_variant                                                                        |
| rs1376897894 | intron_variant,genic_upstream_transcript_variant                                                                        |
| rs1376904686 | intron_variant                                                                                                          |
| rs1376924625 | intron_variant,genic_upstream_transcript_variant                                                                        |
| rs1376966388 | intron_variant                                                                                                          |
| rs1377039968 | genic_downstream_transcript_variant,intron_variant                                                                      |
| rs1377043772 | genic_downstream_transcript_variant,intron_variant                                                                      |
| rs1377051452 | intron_variant,genic_upstream_transcript_variant                                                                        |
| rs1377051775 | genic_downstream_transcript_variant,intron_variant                                                                      |
| rs1377099824 | genic_downstream_transcript_variant,intron_variant                                                                      |
| rs1377190110 | intron_variant                                                                                                          |
| rs1377214126 | genic_downstream_transcript_variant,intron_variant                                                                      |
| rs1377225979 | intron_variant                                                                                                          |
| rs1377317045 | intron_variant,genic_upstream_transcript_variant                                                                        |
| rs1377333532 | intron_variant,genic_upstream_transcript_variant                                                                        |
| rs1377340739 | intron_variant,genic_upstream_transcript_variant                                                                        |
| rs1377357363 | intron_variant                                                                                                          |
| rs1377373568 | genic_downstream_transcript_variant,intron_variant                                                                      |
| rs1377385831 | 2KB_upstream_variant,upstream_transcript_variant,intron_variant,genic_upstream_transcript_variant                       |
| rs1377400281 | intron_variant,genic_upstream_transcript_variant                                                                        |
| rs1377449058 | intron_variant                                                                                                          |
| rs1377472821 | intron_variant,genic_upstream_transcript_variant                                                                        |
| rs1377507739 | 2KB_upstream_variant,upstream_transcript_variant,intron_variant,genic_upstream_transcript_variant                       |
| rs1377556179 | intron_variant,genic_upstream_transcript_variant                                                                        |
| rs1377559420 | intron_variant                                                                                                          |
| rs1377575152 | intron_variant,genic_upstream_transcript_variant                                                                        |
| rs1377629643 | intron_variant,genic_upstream_transcript_variant                                                                        |
| rs1377675540 | intron_variant,genic_upstream_transcript_variant                                                                        |
| rs1377691467 | intron_variant                                                                                                          |
| rs1377697417 | genic_downstream_transcript_variant,intron_variant                                                                      |
| rs1377735815 | genic_downstream_transcript_variant,intron_variant                                                                      |
| rs1377741501 | upstream_transcript_variant,intron_variant,genic_upstream_transcript_variant                                            |
| rs1377751294 | genic_downstream_transcript_variant,intron_variant                                                                      |
| rs1377758118 | coding_sequence_variant,genic_upstream_transcript_variant,missense_variant,non_coding_transcript_variant,intron_variant |
| rs1377784179 | intron_variant,genic_upstream_transcript_variant                                                                        |
| rs1377800110 | intron_variant                                                                                                          |
| rs1377804283 | genic_downstream_transcript_variant,intron_variant                                                                      |
| rs1377823554 | intron_variant,genic_upstream_transcript_variant                                                                        |
| rs1377872978 | genic_downstream_transcript_variant,intron_variant                                                                      |
| rs1377935711 | intron_variant                                                                                                          |
| rs1377953941 | genic_downstream_transcript_variant,intron_variant                                                                      |
| rs1378002025 | intron_variant,genic_upstream_transcript_variant                                                                        |
| rs1378011207 | intron_variant                                                                                                          |
| rs1378031908 | intron_variant,genic_upstream_transcript_variant                                                                        |
| rs1378061865 | genic_downstream_transcript_variant,intron_variant                                                                      |
| rs1378120910 | intron_variant,genic_upstream_transcript_variant                                                                        |
| rs1378129046 | intron_variant                                                                                                          |

|              |                                                                                                            |
|--------------|------------------------------------------------------------------------------------------------------------|
| rs1378132900 | intron_variant                                                                                             |
| rs1378149050 | intron_variant,genic_upstream_transcript_variant                                                           |
| rs1378154283 | intron_variant,genic_upstream_transcript_variant                                                           |
| rs1378190821 | genic_downstream_transcript_variant,intron_variant                                                         |
| rs1378200304 | intron_variant                                                                                             |
| rs1378229618 | intron_variant,genic_upstream_transcript_variant                                                           |
| rs1378251166 | intron_variant                                                                                             |
| rs1378326043 | intron_variant,genic_upstream_transcript_variant                                                           |
| rs1378330960 | intron_variant                                                                                             |
| rs1378359211 | intron_variant                                                                                             |
| rs1378368059 | intron_variant,genic_upstream_transcript_variant                                                           |
| rs1378396865 | intron_variant                                                                                             |
| rs1378402747 | intron_variant,genic_upstream_transcript_variant                                                           |
| rs1378415815 | intron_variant,genic_upstream_transcript_variant                                                           |
| rs1378418693 | intron_variant                                                                                             |
| rs1378419134 | intron_variant,genic_upstream_transcript_variant                                                           |
| rs1378433521 | intron_variant                                                                                             |
| rs1378435496 | intron_variant,genic_upstream_transcript_variant                                                           |
| rs1378454960 | genic_downstream_transcript_variant,intron_variant                                                         |
| rs1378490506 | intron_variant                                                                                             |
| rs1378520496 | intron_variant,genic_upstream_transcript_variant                                                           |
| rs1378599992 | intron_variant                                                                                             |
| rs1378603779 | upstream_transcript_variant,intron_variant,genic_upstream_transcript_variant                               |
| rs1378626919 | intron_variant,genic_upstream_transcript_variant                                                           |
| rs1378627162 | intron_variant,genic_upstream_transcript_variant                                                           |
| rs1378660561 | intron_variant                                                                                             |
| rs1378666021 | intron_variant                                                                                             |
| rs1378666843 | upstream_transcript_variant,intron_variant,genic_upstream_transcript_variant                               |
| rs1378713605 | intron_variant,genic_upstream_transcript_variant                                                           |
| rs1378721171 | intron_variant,genic_upstream_transcript_variant                                                           |
| rs1378740898 | intron_variant                                                                                             |
| rs1378754922 | intron_variant,genic_upstream_transcript_variant                                                           |
| rs1378759032 | genic_downstream_transcript_variant,intron_variant                                                         |
| rs1378764768 | 2KB_upstream_variant,upstream_transcript_variant,intron_variant,genic_upstream_transcript_variant          |
| rs1378772766 | intron_variant                                                                                             |
| rs1378806303 | intron_variant,genic_upstream_transcript_variant                                                           |
| rs1378865173 | genic_downstream_transcript_variant,intron_variant                                                         |
| rs1378925174 | intron_variant                                                                                             |
| rs1378947517 | intron_variant,genic_upstream_transcript_variant                                                           |
| rs1378963674 | genic_downstream_transcript_variant,intron_variant                                                         |
| rs1378996595 | intron_variant                                                                                             |
| rs1379007709 | intron_variant,genic_upstream_transcript_variant                                                           |
| rs1379012001 | intron_variant                                                                                             |
| rs1379048138 | genic_downstream_transcript_variant,intron_variant                                                         |
| rs1379078529 | genic_downstream_transcript_variant,missense_variant,coding_sequence_variant,non_coding_transcript_variant |
| rs1379099372 | intron_variant                                                                                             |
| rs1379133384 | intron_variant                                                                                             |
| rs1379146765 | genic_downstream_transcript_variant,intron_variant                                                         |
| rs1379200579 | genic_downstream_transcript_variant,intron_variant                                                         |
| rs1379218158 | genic_downstream_transcript_variant,intron_variant                                                         |
| rs1379245003 | upstream_transcript_variant,intron_variant,genic_upstream_transcript_variant                               |
| rs1379288765 | intron_variant                                                                                             |
| rs1379319941 | intron_variant,genic_upstream_transcript_variant                                                           |
| rs1379320051 | intron_variant                                                                                             |
| rs1379374195 | genic_downstream_transcript_variant,intron_variant                                                         |
| rs1379386057 | downstream_transcript_variant,500B_downstream_variant                                                      |
| rs1379443877 | genic_downstream_transcript_variant,intron_variant                                                         |
| rs1379462485 | genic_downstream_transcript_variant,intron_variant                                                         |
| rs1379476494 | intron_variant,genic_upstream_transcript_variant                                                           |
| rs1379482761 | genic_downstream_transcript_variant,3_prime_UTR_variant,non_coding_transcript_variant                      |
| rs1379507846 | genic_downstream_transcript_variant,intron_variant                                                         |
| rs1379517827 | intron_variant                                                                                             |
| rs1379540373 | intron_variant,genic_upstream_transcript_variant                                                           |
| rs1379574810 | genic_downstream_transcript_variant,intron_variant                                                         |
| rs1379623853 | genic_downstream_transcript_variant,intron_variant                                                         |
| rs1379633658 | intron_variant                                                                                             |
| rs1379654139 | intron_variant,genic_upstream_transcript_variant                                                           |
| rs1379669221 | intron_variant,genic_upstream_transcript_variant                                                           |
| rs1379723005 | intron_variant,genic_upstream_transcript_variant                                                           |
| rs1379752268 | intron_variant                                                                                             |
| rs1379815125 | intron_variant,genic_upstream_transcript_variant                                                           |
| rs1379818206 | genic_downstream_transcript_variant,intron_variant                                                         |
| rs1379856977 | intron_variant                                                                                             |
| rs1379882081 | genic_downstream_transcript_variant,intron_variant                                                         |

|              |                                                                                                                           |
|--------------|---------------------------------------------------------------------------------------------------------------------------|
| rs1379886233 | intron_variant                                                                                                            |
| rs1379917310 | intron_variant,genetic_upstream_transcript_variant                                                                        |
| rs1379934608 | intron_variant                                                                                                            |
| rs1379949689 | intron_variant                                                                                                            |
| rs1379950354 | intron_variant                                                                                                            |
| rs1380012385 | intron_variant                                                                                                            |
| rs1380019258 | intron_variant                                                                                                            |
| rs1380064475 | genetic_downstream_transcript_variant,intron_variant                                                                      |
| rs1380097645 | intron_variant                                                                                                            |
| rs1380141941 | intron_variant,genetic_upstream_transcript_variant                                                                        |
| rs1380155580 | intron_variant                                                                                                            |
| rs1380201461 | genetic_downstream_transcript_variant,intron_variant                                                                      |
| rs1380218442 | intron_variant,genetic_upstream_transcript_variant                                                                        |
| rs1380220737 | intron_variant,genetic_upstream_transcript_variant                                                                        |
| rs1380257341 | intron_variant                                                                                                            |
| rs1380300273 | intron_variant                                                                                                            |
| rs1380329809 | genetic_downstream_transcript_variant,intron_variant                                                                      |
| rs1380341309 | genetic_downstream_transcript_variant,intron_variant                                                                      |
| rs1380406180 | intron_variant                                                                                                            |
| rs1380456478 | genetic_downstream_transcript_variant,intron_variant                                                                      |
| rs1380465485 | genetic_downstream_transcript_variant,intron_variant                                                                      |
| rs1380501001 | intron_variant                                                                                                            |
| rs1380521515 | intron_variant                                                                                                            |
| rs1380568693 | genetic_downstream_transcript_variant,intron_variant                                                                      |
| rs1380593829 | intron_variant,genetic_upstream_transcript_variant                                                                        |
| rs1380636538 | intron_variant,genetic_upstream_transcript_variant                                                                        |
| rs1380639845 | intron_variant                                                                                                            |
| rs1380643241 | genetic_downstream_transcript_variant,intron_variant                                                                      |
| rs1380660880 | intron_variant,genetic_upstream_transcript_variant                                                                        |
| rs1380686960 | intron_variant                                                                                                            |
| rs1380704259 | intron_variant                                                                                                            |
| rs1380716538 | genetic_downstream_transcript_variant,intron_variant                                                                      |
| rs1380739073 | intron_variant                                                                                                            |
| rs1380753371 | intron_variant                                                                                                            |
| rs1380786322 | upstream_transcript_variant,intron_variant,genetic_upstream_transcript_variant                                            |
| rs1380799661 | intron_variant,genetic_upstream_transcript_variant                                                                        |
| rs1380809268 | intron_variant                                                                                                            |
| rs1380855156 | genetic_downstream_transcript_variant,intron_variant                                                                      |
| rs1380889320 | intron_variant,genetic_upstream_transcript_variant                                                                        |
| rs1380896518 | upstream_transcript_variant,intron_variant,genetic_upstream_transcript_variant                                            |
| rs1380897374 | intron_variant,genetic_upstream_transcript_variant                                                                        |
| rs1380913802 | intron_variant,genetic_upstream_transcript_variant                                                                        |
| rs1380934533 | intron_variant,genetic_upstream_transcript_variant                                                                        |
| rs1380981363 | intron_variant                                                                                                            |
| rs1381009467 | intron_variant                                                                                                            |
| rs1381048424 | intron_variant,genetic_upstream_transcript_variant                                                                        |
| rs1381062235 | intron_variant,genetic_upstream_transcript_variant                                                                        |
| rs1381092078 | upstream_transcript_variant,intron_variant,genetic_upstream_transcript_variant                                            |
| rs1381118238 | genetic_downstream_transcript_variant,intron_variant                                                                      |
| rs1381129384 | intron_variant,genetic_upstream_transcript_variant                                                                        |
| rs1381157659 | 2KB_upstream_variant,upstream_transcript_variant,intron_variant,genetic_upstream_transcript_variant                       |
| rs1381178160 | intron_variant                                                                                                            |
| rs1381185879 | intron_variant                                                                                                            |
| rs1381225360 | intron_variant,genetic_upstream_transcript_variant                                                                        |
| rs1381298662 | intron_variant                                                                                                            |
| rs1381412567 | intron_variant                                                                                                            |
| rs1381420521 | genetic_downstream_transcript_variant,intron_variant                                                                      |
| rs1381450027 | intron_variant,genetic_upstream_transcript_variant                                                                        |
| rs1381473114 | intron_variant,genetic_upstream_transcript_variant                                                                        |
| rs1381495695 | intron_variant                                                                                                            |
| rs1381523825 | intron_variant,genetic_upstream_transcript_variant                                                                        |
| rs1381548414 | intron_variant                                                                                                            |
| rs1381554784 | coding_sequence_variant,genetic_upstream_transcript_variant,missense_variant,non_coding_transcript_variant,intron_variant |
| rs1381571819 | intron_variant                                                                                                            |
| rs1381622779 | intron_variant                                                                                                            |
| rs1381623174 | intron_variant                                                                                                            |
| rs1381649287 | intron_variant,genetic_upstream_transcript_variant                                                                        |
| rs1381660941 | intron_variant                                                                                                            |
| rs1381694848 | synonymous_variant,coding_sequence_variant,non_coding_transcript_variant                                                  |
| rs1381725732 | genetic_downstream_transcript_variant,intron_variant                                                                      |
| rs1381743748 | upstream_transcript_variant,5_prime_UTR_variant,intron_variant,genetic_upstream_transcript_variant                        |
| rs1381748037 | intron_variant                                                                                                            |
| rs1381789805 | intron_variant,genetic_upstream_transcript_variant                                                                        |
| rs1381813156 | intron_variant,genetic_upstream_transcript_variant                                                                        |

|              |                                                                                                   |
|--------------|---------------------------------------------------------------------------------------------------|
| rs1381822111 | upstream_transcript_variant,intron_variant,genic_upstream_transcript_variant                      |
| rs1381833846 | intron_variant                                                                                    |
| rs1381834234 | upstream_transcript_variant,intron_variant,genic_upstream_transcript_variant                      |
| rs1381847410 | intron_variant,genic_upstream_transcript_variant                                                  |
| rs1381852348 | intron_variant,genic_upstream_transcript_variant                                                  |
| rs1381894921 | 2KB_upstream_variant,upstream_transcript_variant,intron_variant,genic_upstream_transcript_variant |
| rs1381914996 | intron_variant,genic_upstream_transcript_variant                                                  |
| rs1381946914 | intron_variant                                                                                    |
| rs1381975427 | intron_variant                                                                                    |
| rs1382005025 | genic_downstream_transcript_variant,intron_variant                                                |
| rs1382062652 | intron_variant,genic_upstream_transcript_variant                                                  |
| rs1382088629 | intron_variant,genic_upstream_transcript_variant                                                  |
| rs1382141349 | intron_variant,genic_upstream_transcript_variant                                                  |
| rs1382156424 | intron_variant,genic_upstream_transcript_variant                                                  |
| rs1382199100 | intron_variant,genic_upstream_transcript_variant                                                  |
| rs1382212168 | genic_downstream_transcript_variant,intron_variant                                                |
| rs1382245126 | intron_variant,genic_upstream_transcript_variant                                                  |
| rs1382263718 | intron_variant                                                                                    |
| rs1382267511 | intron_variant,genic_upstream_transcript_variant                                                  |
| rs1382275871 | intron_variant                                                                                    |
| rs1382293477 | intron_variant,genic_upstream_transcript_variant                                                  |
| rs1382340136 | intron_variant                                                                                    |
| rs1382340697 | intron_variant,genic_upstream_transcript_variant                                                  |
| rs1382342598 | intron_variant                                                                                    |
| rs1382402201 | genic_downstream_transcript_variant,intron_variant                                                |
| rs1382404525 | intron_variant,genic_upstream_transcript_variant                                                  |
| rs1382422522 | genic_downstream_transcript_variant,intron_variant                                                |
| rs1382426549 | intron_variant,genic_upstream_transcript_variant                                                  |
| rs1382440266 | intron_variant,genic_upstream_transcript_variant                                                  |
| rs1382441321 | intron_variant,genic_upstream_transcript_variant                                                  |
| rs1382443390 | intron_variant,genic_upstream_transcript_variant                                                  |
| rs1382446348 | genic_downstream_transcript_variant,intron_variant                                                |
| rs1382531041 | 2KB_upstream_variant,upstream_transcript_variant,intron_variant,genic_upstream_transcript_variant |
| rs1382540447 | intron_variant                                                                                    |
| rs1382567133 | downstream_transcript_variant,500B_downstream_variant                                             |
| rs1382579634 | intron_variant                                                                                    |
| rs1382583306 | genic_downstream_transcript_variant,intron_variant                                                |
| rs1382608429 | genic_downstream_transcript_variant,intron_variant                                                |
| rs1382635259 | intron_variant,genic_upstream_transcript_variant                                                  |
| rs1382664164 | intron_variant,genic_upstream_transcript_variant                                                  |
| rs1382669338 | genic_downstream_transcript_variant,intron_variant                                                |
| rs1382674774 | intron_variant,genic_upstream_transcript_variant                                                  |
| rs1382681519 | intron_variant,genic_upstream_transcript_variant                                                  |
| rs1382714094 | genic_downstream_transcript_variant,intron_variant                                                |
| rs1382752445 | upstream_transcript_variant,intron_variant,genic_upstream_transcript_variant                      |
| rs1382772997 | upstream_transcript_variant,intron_variant,genic_upstream_transcript_variant                      |
| rs1382787042 | genic_downstream_transcript_variant,downstream_transcript_variant,intron_variant                  |
| rs1382811393 | intron_variant                                                                                    |
| rs1382821546 | genic_downstream_transcript_variant,intron_variant                                                |
| rs1382844845 | intron_variant,genic_upstream_transcript_variant                                                  |
| rs1382871882 | intron_variant,genic_upstream_transcript_variant                                                  |
| rs1382903588 | intron_variant,genic_upstream_transcript_variant                                                  |
| rs1382905617 | intron_variant                                                                                    |
| rs1382910566 | intron_variant,genic_upstream_transcript_variant                                                  |
| rs1382957259 | intron_variant,genic_upstream_transcript_variant                                                  |
| rs1382983235 | intron_variant,genic_upstream_transcript_variant                                                  |
| rs1382983595 | genic_downstream_transcript_variant,3_prime_UTR_variant,non_coding_transcript_variant             |
| rs1382993558 | genic_downstream_transcript_variant,intron_variant                                                |
| rs1383010384 | intron_variant                                                                                    |
| rs1383011276 | intron_variant                                                                                    |
| rs1383012850 | intron_variant                                                                                    |
| rs1383013952 | 2KB_upstream_variant,upstream_transcript_variant,intron_variant,genic_upstream_transcript_variant |
| rs1383030592 | 2KB_upstream_variant,upstream_transcript_variant,intron_variant,genic_upstream_transcript_variant |
| rs1383044067 | intron_variant,genic_upstream_transcript_variant                                                  |
| rs1383104743 | intron_variant                                                                                    |
| rs1383115382 | intron_variant,genic_upstream_transcript_variant                                                  |
| rs1383138195 | intron_variant,genic_upstream_transcript_variant                                                  |
| rs1383141686 | intron_variant,genic_upstream_transcript_variant                                                  |
| rs1383178470 | intron_variant                                                                                    |
| rs1383184292 | intron_variant                                                                                    |
| rs1383207917 | intron_variant                                                                                    |
| rs1383230541 | intron_variant                                                                                    |
| rs1383256668 | intron_variant                                                                                    |
| rs1383276866 | intron_variant                                                                                    |

|              |                                                                                                   |
|--------------|---------------------------------------------------------------------------------------------------|
| rs1383295696 | intron_variant                                                                                    |
| rs1383331755 | intron_variant,genic_upstream_transcript_variant                                                  |
| rs1383374613 | intron_variant                                                                                    |
| rs1383383155 | intron_variant,genic_upstream_transcript_variant                                                  |
| rs1383386383 | intron_variant,genic_upstream_transcript_variant                                                  |
| rs1383389845 | genic_downstream_transcript_variant,intron_variant                                                |
| rs1383431312 | intron_variant                                                                                    |
| rs1383446554 | intron_variant,genic_upstream_transcript_variant                                                  |
| rs1383476358 | genic_downstream_transcript_variant,intron_variant                                                |
| rs1383516843 | intron_variant,genic_upstream_transcript_variant                                                  |
| rs1383543664 | intron_variant                                                                                    |
| rs1383563784 | intron_variant                                                                                    |
| rs1383568140 | genic_downstream_transcript_variant,intron_variant                                                |
| rs1383601767 | intron_variant,genic_upstream_transcript_variant                                                  |
| rs1383610420 | intron_variant                                                                                    |
| rs1383621711 | intron_variant,genic_upstream_transcript_variant                                                  |
| rs1383683727 | intron_variant                                                                                    |
| rs1383724768 | intron_variant                                                                                    |
| rs1383755312 | genic_downstream_transcript_variant,intron_variant                                                |
| rs1383828081 | intron_variant,genic_upstream_transcript_variant                                                  |
| rs1383836032 | genic_downstream_transcript_variant,intron_variant                                                |
| rs1383867175 | intron_variant,genic_upstream_transcript_variant                                                  |
| rs1383892805 | 2KB_upstream_variant,upstream_transcript_variant,intron_variant,genic_upstream_transcript_variant |
| rs1383934902 | intron_variant,genic_upstream_transcript_variant                                                  |
| rs1383968940 | genic_downstream_transcript_variant,intron_variant                                                |
| rs1384009356 | genic_downstream_transcript_variant,intron_variant                                                |
| rs1384095355 | genic_downstream_transcript_variant,intron_variant                                                |
| rs1384111159 | intron_variant,genic_upstream_transcript_variant                                                  |
| rs1384137257 | intron_variant                                                                                    |
| rs1384170447 | intron_variant,genic_upstream_transcript_variant                                                  |
| rs1384271703 | intron_variant,genic_downstream_transcript_variant                                                |
| rs1384325687 | intron_variant,genic_upstream_transcript_variant                                                  |
| rs1384329313 | intron_variant                                                                                    |
| rs1384345609 | intron_variant,genic_downstream_transcript_variant                                                |
| rs1384366777 | intron_variant                                                                                    |
| rs1384409373 | intron_variant,genic_upstream_transcript_variant                                                  |
| rs1384428538 | intron_variant                                                                                    |
| rs1384454859 | intron_variant,genic_downstream_transcript_variant                                                |
| rs1384463304 | intron_variant,genic_downstream_transcript_variant                                                |
| rs1384500331 | intron_variant                                                                                    |
| rs1384544481 | intron_variant,genic_upstream_transcript_variant                                                  |
| rs1384565004 | intron_variant                                                                                    |
| rs1384577017 | intron_variant                                                                                    |
| rs1384662132 | intron_variant,genic_upstream_transcript_variant                                                  |
| rs1384719734 | intron_variant,genic_downstream_transcript_variant                                                |
| rs1384745840 | intron_variant,genic_upstream_transcript_variant                                                  |
| rs1384803382 | intron_variant,genic_upstream_transcript_variant,upstream_transcript_variant                      |
| rs1384804925 | genic_downstream_transcript_variant,3_prime_UTR_variant,non_coding_transcript_variant             |
| rs1384826178 | intron_variant                                                                                    |
| rs1384884873 | intron_variant                                                                                    |
| rs1384923387 | intron_variant                                                                                    |
| rs1385026432 | intron_variant                                                                                    |
| rs1385030644 | intron_variant,genic_downstream_transcript_variant                                                |
| rs1385064216 | intron_variant,genic_upstream_transcript_variant                                                  |
| rs1385105421 | intron_variant,genic_upstream_transcript_variant                                                  |
| rs1385167713 | intron_variant,genic_downstream_transcript_variant                                                |
| rs1385182317 | downstream_transcript_variant,intron_variant,genic_downstream_transcript_variant                  |
| rs1385193389 | intron_variant,genic_upstream_transcript_variant                                                  |
| rs1385220808 | intron_variant                                                                                    |
| rs1385232647 | intron_variant,genic_upstream_transcript_variant                                                  |
| rs1385263789 | intron_variant,genic_upstream_transcript_variant                                                  |
| rs1385266262 | intron_variant,genic_downstream_transcript_variant                                                |
| rs1385270673 | intron_variant                                                                                    |
| rs1385275180 | intron_variant                                                                                    |
| rs1385295918 | intron_variant                                                                                    |
| rs1385303140 | intron_variant                                                                                    |
| rs1385324980 | genic_upstream_transcript_variant,intron_variant,5_prime_UTR_variant,upstream_transcript_variant  |
| rs1385371022 | upstream_transcript_variant,intron_variant,genic_upstream_transcript_variant,2KB_upstream_variant |
| rs1385417926 | upstream_transcript_variant,intron_variant,genic_upstream_transcript_variant,2KB_upstream_variant |
| rs1385429940 | intron_variant,genic_upstream_transcript_variant                                                  |
| rs1385437846 | intron_variant,genic_upstream_transcript_variant                                                  |
| rs138533983  | intron_variant,genic_downstream_transcript_variant                                                |
| rs1385567719 | upstream_transcript_variant,intron_variant,genic_upstream_transcript_variant,2KB_upstream_variant |
| rs1385570605 | intron_variant,genic_downstream_transcript_variant                                                |

|              |                                                                                                                         |
|--------------|-------------------------------------------------------------------------------------------------------------------------|
| rs1385616331 | intron_variant,genic_upstream_transcript_variant                                                                        |
| rs1385626914 | intron_variant,genic_upstream_transcript_variant                                                                        |
| rs1385628689 | intron_variant,genic_upstream_transcript_variant                                                                        |
| rs1385635394 | intron_variant                                                                                                          |
| rs1385696742 | intron_variant,genic_downstream_transcript_variant                                                                      |
| rs1385718256 | intron_variant                                                                                                          |
| rs1385783526 | intron_variant,genic_downstream_transcript_variant                                                                      |
| rs1385834236 | intron_variant                                                                                                          |
| rs1385866035 | coding_sequence_variant,frameshift_variant,non_coding_transcript_variant                                                |
| rs1385889225 | intron_variant,genic_upstream_transcript_variant                                                                        |
| rs1385939015 | intron_variant,genic_upstream_transcript_variant                                                                        |
| rs1385958001 | intron_variant,genic_upstream_transcript_variant,upstream_transcript_variant                                            |
| rs1385990783 | intron_variant,genic_downstream_transcript_variant                                                                      |
| rs1386004773 | intron_variant                                                                                                          |
| rs1386015604 | intron_variant,genic_upstream_transcript_variant                                                                        |
| rs1386072717 | intron_variant,genic_downstream_transcript_variant                                                                      |
| rs1386082247 | intron_variant                                                                                                          |
| rs1386101687 | intron_variant,genic_downstream_transcript_variant                                                                      |
| rs1386101878 | intron_variant                                                                                                          |
| rs1386153686 | intron_variant                                                                                                          |
| rs1386162623 | intron_variant,genic_upstream_transcript_variant                                                                        |
| rs1386215990 | intron_variant,genic_upstream_transcript_variant                                                                        |
| rs1386225386 | intron_variant,genic_downstream_transcript_variant                                                                      |
| rs1386232755 | intron_variant,genic_downstream_transcript_variant                                                                      |
| rs1386245037 | intron_variant,genic_upstream_transcript_variant,upstream_transcript_variant                                            |
| rs1386257299 | intron_variant,genic_downstream_transcript_variant                                                                      |
| rs1386260763 | intron_variant                                                                                                          |
| rs1386295688 | intron_variant,genic_upstream_transcript_variant                                                                        |
| rs1386307606 | intron_variant,genic_upstream_transcript_variant                                                                        |
| rs1386339445 | intron_variant,genic_upstream_transcript_variant                                                                        |
| rs1386343651 | intron_variant                                                                                                          |
| rs1386355015 | intron_variant,genic_downstream_transcript_variant                                                                      |
| rs1386387759 | intron_variant                                                                                                          |
| rs1386402335 | intron_variant,genic_upstream_transcript_variant                                                                        |
| rs1386418718 | intron_variant,genic_downstream_transcript_variant                                                                      |
| rs1386434810 | genic_downstream_transcript_variant,3_prime_UTR_variant,non_coding_transcript_variant                                   |
| rs1386475587 | intron_variant                                                                                                          |
| rs1386489358 | intron_variant,genic_upstream_transcript_variant                                                                        |
| rs1386493397 | intron_variant                                                                                                          |
| rs1386496023 | intron_variant,genic_upstream_transcript_variant                                                                        |
| rs1386508426 | intron_variant                                                                                                          |
| rs1386553574 | intron_variant                                                                                                          |
| rs1386556933 | intron_variant,genic_upstream_transcript_variant                                                                        |
| rs1386580690 | coding_sequence_variant,missense_variant,non_coding_transcript_variant                                                  |
| rs1386591021 | intron_variant                                                                                                          |
| rs1386637354 | intron_variant,genic_downstream_transcript_variant                                                                      |
| rs1386650557 | downstream_transcript_variant,intron_variant,genic_downstream_transcript_variant                                        |
| rs1386718651 | intron_variant,genic_upstream_transcript_variant                                                                        |
| rs1386756691 | intron_variant,genic_downstream_transcript_variant                                                                      |
| rs1386758364 | intron_variant,genic_upstream_transcript_variant                                                                        |
| rs1386763508 | intron_variant,genic_downstream_transcript_variant                                                                      |
| rs1386763556 | intron_variant                                                                                                          |
| rs1386845287 | intron_variant,genic_upstream_transcript_variant                                                                        |
| rs1386853491 | intron_variant,genic_downstream_transcript_variant                                                                      |
| rs1386875834 | intron_variant,genic_upstream_transcript_variant                                                                        |
| rs1386894508 | intron_variant,genic_downstream_transcript_variant                                                                      |
| rs1386941951 | intron_variant                                                                                                          |
| rs1386954566 | intron_variant,genic_upstream_transcript_variant                                                                        |
| rs1386998509 | intron_variant                                                                                                          |
| rs1387008126 | intron_variant,genic_upstream_transcript_variant                                                                        |
| rs1387014911 | genic_downstream_transcript_variant,3_prime_UTR_variant,non_coding_transcript_variant                                   |
| rs1387043446 | intron_variant                                                                                                          |
| rs1387050963 | intron_variant                                                                                                          |
| rs1387051194 | intron_variant,genic_downstream_transcript_variant                                                                      |
| rs1387065415 | intron_variant,missense_variant,genic_upstream_transcript_variant,coding_sequence_variant,non_coding_transcript_variant |
| rs1387070309 | intron_variant                                                                                                          |
| rs1387138694 | intron_variant                                                                                                          |
| rs1387162764 | intron_variant,genic_upstream_transcript_variant                                                                        |
| rs1387168803 | intron_variant,genic_upstream_transcript_variant                                                                        |
| rs1387243275 | intron_variant,genic_upstream_transcript_variant                                                                        |
| rs1387267958 | intron_variant,genic_upstream_transcript_variant                                                                        |
| rs1387337481 | intron_variant,genic_upstream_transcript_variant,upstream_transcript_variant                                            |
| rs1387337919 | intron_variant,genic_upstream_transcript_variant                                                                        |
| rs1387354897 | intron_variant                                                                                                          |

|              |                                                                                                                    |
|--------------|--------------------------------------------------------------------------------------------------------------------|
| rs1387443154 | intron_variant                                                                                                     |
| rs1387497913 | intron_variant                                                                                                     |
| rs1387513545 | intron_variant,genic_upstream_transcript_variant                                                                   |
| rs1387531681 | intron_variant,genic_downstream_transcript_variant                                                                 |
| rs1387543965 | intron_variant,genic_downstream_transcript_variant                                                                 |
| rs1387564266 | intron_variant,genic_upstream_transcript_variant                                                                   |
| rs1387573950 | intron_variant,genic_downstream_transcript_variant                                                                 |
| rs1387610193 | intron_variant                                                                                                     |
| rs1387663766 | intron_variant,genic_downstream_transcript_variant                                                                 |
| rs1387731685 | intron_variant,genic_upstream_transcript_variant                                                                   |
| rs1387739761 | intron_variant,genic_upstream_transcript_variant                                                                   |
| rs1387742918 | intron_variant                                                                                                     |
| rs1387766820 | intron_variant                                                                                                     |
| rs1387785357 | intron_variant,genic_upstream_transcript_variant                                                                   |
| rs1387788005 | intron_variant                                                                                                     |
| rs1387855378 | intron_variant,genic_upstream_transcript_variant                                                                   |
| rs1387856163 | intron_variant,genic_upstream_transcript_variant                                                                   |
| rs1387905198 | intron_variant                                                                                                     |
| rs1387983077 | intron_variant,genic_upstream_transcript_variant                                                                   |
| rs1387985036 | intron_variant,genic_downstream_transcript_variant                                                                 |
| rs1388012901 | intron_variant                                                                                                     |
| rs1388021068 | intron_variant,genic_downstream_transcript_variant                                                                 |
| rs1388036369 | intron_variant,genic_upstream_transcript_variant                                                                   |
| rs1388106244 | intron_variant                                                                                                     |
| rs1388129177 | intron_variant,genic_downstream_transcript_variant                                                                 |
| rs1388150627 | intron_variant,genic_upstream_transcript_variant                                                                   |
| rs1388200051 | intron_variant,genic_upstream_transcript_variant                                                                   |
| rs1388267642 | intron_variant                                                                                                     |
| rs1388293391 | intron_variant,genic_downstream_transcript_variant                                                                 |
| rs1388333532 | intron_variant                                                                                                     |
| rs1388342618 | intron_variant,genic_upstream_transcript_variant                                                                   |
| rs1388374044 | intron_variant,genic_upstream_transcript_variant                                                                   |
| rs1388386566 | intron_variant,genic_upstream_transcript_variant                                                                   |
| rs1388391125 | intron_variant,genic_downstream_transcript_variant                                                                 |
| rs1388419803 | intron_variant,genic_downstream_transcript_variant                                                                 |
| rs1388437607 | intron_variant,genic_downstream_transcript_variant                                                                 |
| rs1388450525 | intron_variant,genic_upstream_transcript_variant                                                                   |
| rs1388482012 | intron_variant,genic_upstream_transcript_variant                                                                   |
| rs1388487349 | intron_variant,genic_upstream_transcript_variant,upstream_transcript_variant                                       |
| rs1388495072 | intron_variant,genic_upstream_transcript_variant                                                                   |
| rs1388505904 | intron_variant,genic_upstream_transcript_variant,upstream_transcript_variant                                       |
| rs1388545214 | intron_variant,genic_upstream_transcript_variant                                                                   |
| rs1388552126 | intron_variant                                                                                                     |
| rs1388559658 | intron_variant                                                                                                     |
| rs1388579075 | intron_variant,genic_upstream_transcript_variant                                                                   |
| rs1388611075 | intron_variant                                                                                                     |
| rs1388616839 | intron_variant                                                                                                     |
| rs1388652724 | intron_variant,genic_downstream_transcript_variant                                                                 |
| rs1388656041 | intron_variant,genic_upstream_transcript_variant                                                                   |
| rs1388680871 | intron_variant,5_prime_UTR_variant                                                                                 |
| rs1388703641 | intron_variant,genic_downstream_transcript_variant                                                                 |
| rs1388744855 | intron_variant,genic_upstream_transcript_variant                                                                   |
| rs1388750913 | intron_variant,genic_upstream_transcript_variant                                                                   |
| rs1388756033 | intron_variant                                                                                                     |
| rs1388762352 | intron_variant,genic_upstream_transcript_variant                                                                   |
| rs1388815449 | intron_variant                                                                                                     |
| rs1388841010 | intron_variant,genic_upstream_transcript_variant                                                                   |
| rs1388926847 | intron_variant                                                                                                     |
| rs1388947864 | intron_variant,genic_upstream_transcript_variant                                                                   |
| rs1388968418 | intron_variant                                                                                                     |
| rs1388977265 | intron_variant,genic_upstream_transcript_variant                                                                   |
| rs1389010919 | intron_variant,genic_downstream_transcript_variant                                                                 |
| rs1389038590 | intron_variant                                                                                                     |
| rs1389042686 | intron_variant,genic_upstream_transcript_variant                                                                   |
| rs1389050816 | intron_variant,genic_upstream_transcript_variant                                                                   |
| rs1389128699 | intron_variant,genic_downstream_transcript_variant                                                                 |
| rs1389142138 | intron_variant,genic_upstream_transcript_variant                                                                   |
| rs1389151480 | intron_variant                                                                                                     |
| rs1389168534 | intron_variant,genic_downstream_transcript_variant                                                                 |
| rs1389168849 | intron_variant,genic_upstream_transcript_variant,stop_gained,coding_sequence_variant,non_coding_transcript_variant |
| rs1389172325 | intron_variant                                                                                                     |
| rs1389235979 | intron_variant                                                                                                     |
| rs1389241703 | intron_variant                                                                                                     |
| rs1389408592 | intron_variant                                                                                                     |

|              |                                                                                                  |
|--------------|--------------------------------------------------------------------------------------------------|
| rs1389434885 | intron_variant,genic_upstream_transcript_variant                                                 |
| rs1389455158 | intron_variant                                                                                   |
| rs1389520279 | intron_variant                                                                                   |
| rs1389527381 | intron_variant,genic_downstream_transcript_variant                                               |
| rs1389557371 | intron_variant,genic_upstream_transcript_variant                                                 |
| rs1389641872 | intron_variant                                                                                   |
| rs1389643930 | intron_variant                                                                                   |
| rs1389698759 | intron_variant                                                                                   |
| rs1389753853 | intron_variant,genic_upstream_transcript_variant                                                 |
| rs1389811761 | intron_variant                                                                                   |
| rs1389840688 | intron_variant                                                                                   |
| rs1389869505 | intron_variant,genic_downstream_transcript_variant                                               |
| rs1389884382 | intron_variant,genic_upstream_transcript_variant                                                 |
| rs1389977134 | intron_variant                                                                                   |
| rs1390002568 | intron_variant,genic_upstream_transcript_variant                                                 |
| rs1390003037 | intron_variant                                                                                   |
| rs1390016918 | genic_downstream_transcript_variant,3_prime_UTR_variant,non_coding_transcript_variant            |
| rs1390034180 | intron_variant,genic_downstream_transcript_variant                                               |
| rs1390036063 | intron_variant,genic_downstream_transcript_variant                                               |
| rs1390039369 | coding_sequence_variant,missense_variant,non_coding_transcript_variant                           |
| rs1390101748 | intron_variant                                                                                   |
| rs1390107936 | intron_variant,genic_downstream_transcript_variant                                               |
| rs1390117090 | intron_variant,genic_upstream_transcript_variant                                                 |
| rs1390181967 | intron_variant,genic_upstream_transcript_variant                                                 |
| rs1390183727 | intron_variant,genic_downstream_transcript_variant                                               |
| rs1390229875 | downstream_transcript_variant,intron_variant,genic_downstream_transcript_variant                 |
| rs1390238580 | intron_variant,genic_upstream_transcript_variant,upstream_transcript_variant                     |
| rs1390276030 | intron_variant,genic_upstream_transcript_variant                                                 |
| rs1390298808 | intron_variant                                                                                   |
| rs1390326041 | intron_variant                                                                                   |
| rs1390348104 | intron_variant,genic_upstream_transcript_variant                                                 |
| rs1390355629 | intron_variant,genic_downstream_transcript_variant                                               |
| rs1390415667 | intron_variant,genic_upstream_transcript_variant                                                 |
| rs1390452240 | intron_variant,genic_upstream_transcript_variant                                                 |
| rs1390473288 | intron_variant,genic_upstream_transcript_variant                                                 |
| rs1390517780 | intron_variant,genic_upstream_transcript_variant                                                 |
| rs1390555366 | intron_variant,genic_upstream_transcript_variant                                                 |
| rs1390567365 | intron_variant                                                                                   |
| rs1390588460 | intron_variant,genic_upstream_transcript_variant                                                 |
| rs1390596457 | intron_variant                                                                                   |
| rs1390656474 | intron_variant                                                                                   |
| rs1390659298 | intron_variant,genic_upstream_transcript_variant                                                 |
| rs1390690848 | intron_variant,genic_downstream_transcript_variant                                               |
| rs1390691749 | intron_variant,genic_upstream_transcript_variant                                                 |
| rs1390759798 | intron_variant                                                                                   |
| rs1390768627 | intron_variant,genic_upstream_transcript_variant                                                 |
| rs1390813768 | intron_variant                                                                                   |
| rs1390825507 | intron_variant,genic_upstream_transcript_variant                                                 |
| rs1390845450 | intron_variant                                                                                   |
| rs1390880579 | intron_variant                                                                                   |
| rs1390885683 | intron_variant                                                                                   |
| rs1390896432 | intron_variant,genic_downstream_transcript_variant                                               |
| rs1390926163 | intron_variant,genic_upstream_transcript_variant                                                 |
| rs1390946091 | intron_variant,genic_upstream_transcript_variant                                                 |
| rs1390948619 | intron_variant,genic_upstream_transcript_variant                                                 |
| rs1390948791 | intron_variant,genic_upstream_transcript_variant,upstream_transcript_variant                     |
| rs1390963367 | intron_variant,genic_upstream_transcript_variant                                                 |
| rs1390972971 | intron_variant,genic_upstream_transcript_variant                                                 |
| rs1390976676 | intron_variant,genic_downstream_transcript_variant                                               |
| rs1390999860 | intron_variant,genic_downstream_transcript_variant                                               |
| rs1391009634 | intron_variant,genic_upstream_transcript_variant                                                 |
| rs1391057922 | intron_variant,genic_upstream_transcript_variant                                                 |
| rs1391079652 | intron_variant                                                                                   |
| rs1391110775 | intron_variant,genic_upstream_transcript_variant                                                 |
| rs1391113855 | intron_variant,genic_upstream_transcript_variant                                                 |
| rs1391140756 | intron_variant,genic_upstream_transcript_variant                                                 |
| rs1391159415 | intron_variant,genic_upstream_transcript_variant                                                 |
| rs1391172129 | genic_upstream_transcript_variant,intron_variant,5_prime_UTR_variant,upstream_transcript_variant |
| rs1391183781 | intron_variant,genic_upstream_transcript_variant                                                 |
| rs1391198809 | intron_variant,genic_downstream_transcript_variant                                               |
| rs1391242302 | intron_variant,genic_downstream_transcript_variant                                               |
| rs1391268690 | intron_variant,genic_downstream_transcript_variant                                               |
| rs1391387615 | intron_variant,genic_upstream_transcript_variant                                                 |
| rs1391401423 | intron_variant                                                                                   |

|              |                                                                                                                                            |
|--------------|--------------------------------------------------------------------------------------------------------------------------------------------|
| rs1391418372 | intron_variant,genic_upstream_transcript_variant                                                                                           |
| rs1391469707 | upstream_transcript_variant,intron_variant,genic_upstream_transcript_variant,2KB_upstream_variant                                          |
| rs1391491424 | intron_variant,genic_upstream_transcript_variant                                                                                           |
| rs1391519514 | intron_variant,genic_upstream_transcript_variant                                                                                           |
| rs1391539830 | intron_variant                                                                                                                             |
| rs1391540049 | intron_variant,genic_downstream_transcript_variant                                                                                         |
| rs1391553931 | intron_variant                                                                                                                             |
| rs1391557859 | intron_variant,genic_upstream_transcript_variant                                                                                           |
| rs1391563299 | intron_variant                                                                                                                             |
| rs1391586038 | intron_variant                                                                                                                             |
| rs1391590759 | intron_variant,genic_upstream_transcript_variant,upstream_transcript_variant                                                               |
| rs1391603220 | intron_variant                                                                                                                             |
| rs1391603972 | intron_variant,genic_downstream_transcript_variant                                                                                         |
| rs1391607156 | intron_variant,genic_upstream_transcript_variant                                                                                           |
| rs1391626998 | intron_variant                                                                                                                             |
| rs1391636683 | intron_variant,genic_upstream_transcript_variant,upstream_transcript_variant                                                               |
| rs1391680687 | intron_variant,missense_variant,genic_upstream_transcript_variant,coding_sequence_variant,non_coding_transcript_variant                    |
| rs1391694378 | intron_variant                                                                                                                             |
| rs1391715912 | intron_variant,genic_downstream_transcript_variant                                                                                         |
| rs1391742795 | downstream_transcript_variant,500B_downstream_variant                                                                                      |
| rs1391774518 | intron_variant,genic_upstream_transcript_variant                                                                                           |
| rs1391790850 | intron_variant,genic_upstream_transcript_variant                                                                                           |
| rs1391841634 | intron_variant,genic_upstream_transcript_variant                                                                                           |
| rs1391842538 | intron_variant                                                                                                                             |
| rs1391865462 | intron_variant,genic_upstream_transcript_variant                                                                                           |
| rs1391904010 | intron_variant,genic_upstream_transcript_variant                                                                                           |
| rs1391923217 | intron_variant,genic_upstream_transcript_variant                                                                                           |
| rs1391943001 | intron_variant,genic_upstream_transcript_variant                                                                                           |
| rs1392001441 | intron_variant                                                                                                                             |
| rs1392027282 | intron_variant                                                                                                                             |
| rs1392046754 | intron_variant                                                                                                                             |
| rs1392060595 | intron_variant                                                                                                                             |
| rs1392065314 | intron_variant,genic_upstream_transcript_variant                                                                                           |
| rs1392076416 | intron_variant,genic_downstream_transcript_variant                                                                                         |
| rs1392076852 | intron_variant,genic_upstream_transcript_variant                                                                                           |
| rs1392083114 | intron_variant,genic_upstream_transcript_variant                                                                                           |
| rs1392135008 | upstream_transcript_variant,intron_variant,genic_upstream_transcript_variant,2KB_upstream_variant                                          |
| rs1392176735 | intron_variant,genic_upstream_transcript_variant                                                                                           |
| rs1392207037 | intron_variant,genic_upstream_transcript_variant                                                                                           |
| rs1392251633 | intron_variant                                                                                                                             |
| rs1392252263 | intron_variant,genic_upstream_transcript_variant                                                                                           |
| rs1392271299 | intron_variant,genic_upstream_transcript_variant                                                                                           |
| rs1392284200 | intron_variant,genic_upstream_transcript_variant                                                                                           |
| rs1392321895 | intron_variant,genic_upstream_transcript_variant                                                                                           |
| rs1392358198 | intron_variant,genic_upstream_transcript_variant                                                                                           |
| rs1392368017 | intron_variant,genic_downstream_transcript_variant                                                                                         |
| rs1392417542 | intron_variant                                                                                                                             |
| rs1392437791 | intron_variant,genic_upstream_transcript_variant                                                                                           |
| rs1392449523 | intron_variant,genic_upstream_transcript_variant                                                                                           |
| rs1392468798 | intron_variant,genic_upstream_transcript_variant,upstream_transcript_variant                                                               |
| rs1392471361 | intron_variant                                                                                                                             |
| rs1392491294 | intron_variant,genic_upstream_transcript_variant,upstream_transcript_variant                                                               |
| rs1392501177 | intron_variant                                                                                                                             |
| rs1392534201 | intron_variant,genic_upstream_transcript_variant                                                                                           |
| rs1392538796 | intron_variant                                                                                                                             |
| rs1392605251 | intron_variant,genic_upstream_transcript_variant                                                                                           |
| rs1392658166 | intron_variant                                                                                                                             |
| rs1392697024 | intron_variant,genic_upstream_transcript_variant                                                                                           |
| rs1392717082 | intron_variant,genic_upstream_transcript_variant                                                                                           |
| rs1392717772 | intron_variant,genic_downstream_transcript_variant                                                                                         |
| rs1392720195 | intron_variant,genic_upstream_transcript_variant                                                                                           |
| rs1392735114 | intron_variant,genic_upstream_transcript_variant                                                                                           |
| rs1392743285 | intron_variant,genic_downstream_transcript_variant                                                                                         |
| rs1392773719 | intron_variant,genic_downstream_transcript_variant                                                                                         |
| rs1392786339 | intron_variant                                                                                                                             |
| rs1392825301 | intron_variant,genic_upstream_transcript_variant                                                                                           |
| rs1392829448 | synonymous_variant,intron_variant,missense_variant,genic_upstream_transcript_variant,coding_sequence_variant,non_coding_transcript_variant |
| rs1392866293 | intron_variant,genic_upstream_transcript_variant,upstream_transcript_variant                                                               |
| rs1392879999 | upstream_transcript_variant,intron_variant,genic_upstream_transcript_variant,2KB_upstream_variant                                          |
| rs1392983126 | intron_variant,genic_downstream_transcript_variant                                                                                         |
| rs1393007534 | intron_variant,genic_upstream_transcript_variant                                                                                           |
| rs1393020819 | intron_variant,genic_upstream_transcript_variant                                                                                           |
| rs1393087394 | intron_variant,genic_downstream_transcript_variant                                                                                         |
| rs1393097964 | intron_variant,genic_downstream_transcript_variant                                                                                         |

|              |                                                                                                   |
|--------------|---------------------------------------------------------------------------------------------------|
| rs1393154492 | intron_variant                                                                                    |
| rs1393154617 | intron_variant                                                                                    |
| rs1393190201 | intron_variant                                                                                    |
| rs1393197238 | intron_variant,genic_downstream_transcript_variant                                                |
| rs1393311156 | intron_variant,genic_downstream_transcript_variant                                                |
| rs1393324757 | intron_variant,genic_upstream_transcript_variant                                                  |
| rs1393343136 | intron_variant,genic_upstream_transcript_variant                                                  |
| rs1393360554 | upstream_transcript_variant,intron_variant,genic_upstream_transcript_variant,2KB_upstream_variant |
| rs1393396497 | intron_variant                                                                                    |
| rs1393412131 | intron_variant                                                                                    |
| rs1393448723 | intron_variant,genic_upstream_transcript_variant                                                  |
| rs1393520091 | intron_variant,genic_downstream_transcript_variant                                                |
| rs1393535176 | intron_variant,genic_upstream_transcript_variant                                                  |
| rs1393637625 | intron_variant,genic_downstream_transcript_variant                                                |
| rs1393653506 | intron_variant,genic_downstream_transcript_variant                                                |
| rs1393681568 | intron_variant,genic_downstream_transcript_variant                                                |
| rs1393727634 | intron_variant,genic_upstream_transcript_variant                                                  |
| rs1393728777 | upstream_transcript_variant,intron_variant,genic_upstream_transcript_variant,2KB_upstream_variant |
| rs1393739006 | intron_variant,genic_downstream_transcript_variant                                                |
| rs1393764968 | intron_variant,genic_upstream_transcript_variant                                                  |
| rs1393778508 | intron_variant,genic_upstream_transcript_variant                                                  |
| rs1393822256 | intron_variant,genic_downstream_transcript_variant                                                |
| rs1393846996 | intron_variant,genic_upstream_transcript_variant                                                  |
| rs1393938014 | intron_variant,genic_upstream_transcript_variant                                                  |
| rs1393939095 | genic_downstream_transcript_variant,3_prime_UTR_variant,non_coding_transcript_variant             |
| rs1393984038 | intron_variant,genic_upstream_transcript_variant                                                  |
| rs1394019228 | intron_variant,genic_upstream_transcript_variant                                                  |
| rs1394050458 | intron_variant                                                                                    |
| rs1394061739 | intron_variant,genic_upstream_transcript_variant                                                  |
| rs1394124974 | intron_variant                                                                                    |
| rs1394127304 | intron_variant,genic_upstream_transcript_variant                                                  |
| rs1394183208 | intron_variant                                                                                    |
| rs1394231349 | intron_variant,genic_upstream_transcript_variant                                                  |
| rs1394240816 | intron_variant                                                                                    |
| rs1394284673 | intron_variant,genic_downstream_transcript_variant                                                |
| rs1394299674 | intron_variant,genic_upstream_transcript_variant                                                  |
| rs1394303425 | intron_variant                                                                                    |
| rs1394308434 | intron_variant,genic_upstream_transcript_variant                                                  |
| rs1394311352 | intron_variant                                                                                    |
| rs1394329370 | intron_variant,genic_upstream_transcript_variant                                                  |
| rs1394382625 | intron_variant                                                                                    |
| rs1394383257 | intron_variant                                                                                    |
| rs1394402012 | intron_variant,genic_upstream_transcript_variant,upstream_transcript_variant                      |
| rs1394427951 | intron_variant                                                                                    |
| rs1394428259 | intron_variant,genic_upstream_transcript_variant                                                  |
| rs1394440250 | intron_variant,genic_downstream_transcript_variant                                                |
| rs1394544879 | intron_variant,genic_upstream_transcript_variant                                                  |
| rs1394556471 | intron_variant                                                                                    |
| rs1394562472 | intron_variant,genic_upstream_transcript_variant                                                  |
| rs1394565500 | intron_variant,genic_downstream_transcript_variant                                                |
| rs1394571385 | upstream_transcript_variant,intron_variant,genic_upstream_transcript_variant,2KB_upstream_variant |
| rs1394580514 | intron_variant,genic_downstream_transcript_variant                                                |
| rs1394583519 | intron_variant,genic_downstream_transcript_variant                                                |
| rs1394618775 | intron_variant,genic_upstream_transcript_variant                                                  |
| rs1394629404 | intron_variant,genic_downstream_transcript_variant                                                |
| rs1394633587 | intron_variant,genic_upstream_transcript_variant                                                  |
| rs1394636708 | intron_variant,genic_downstream_transcript_variant                                                |
| rs1394640404 | intron_variant                                                                                    |
| rs1394735019 | intron_variant,genic_upstream_transcript_variant                                                  |
| rs1394769739 | intron_variant,genic_upstream_transcript_variant                                                  |
| rs1394809365 | intron_variant,genic_upstream_transcript_variant                                                  |
| rs1394815797 | intron_variant,genic_upstream_transcript_variant                                                  |
| rs1394896281 | intron_variant,genic_downstream_transcript_variant                                                |
| rs1394912220 | intron_variant                                                                                    |
| rs1394921073 | intron_variant,genic_downstream_transcript_variant                                                |
| rs1394940728 | genic_downstream_transcript_variant,3_prime_UTR_variant,non_coding_transcript_variant             |
| rs1394942238 | intron_variant,genic_upstream_transcript_variant                                                  |
| rs1394949637 | intron_variant,genic_downstream_transcript_variant                                                |
| rs1394956840 | intron_variant,genic_downstream_transcript_variant                                                |
| rs1394963810 | intron_variant                                                                                    |
| rs1394970351 | intron_variant,genic_downstream_transcript_variant                                                |
| rs1395014018 | intron_variant                                                                                    |
| rs1395027799 | intron_variant                                                                                    |
| rs1395028454 | intron_variant                                                                                    |

|              |                                                                                                   |
|--------------|---------------------------------------------------------------------------------------------------|
| rs1395039176 | intron_variant,genic_upstream_transcript_variant                                                  |
| rs1395060625 | intron_variant,genic_downstream_transcript_variant                                                |
| rs1395064472 | intron_variant,genic_upstream_transcript_variant                                                  |
| rs1395082543 | upstream_transcript_variant,intron_variant,genic_upstream_transcript_variant,2KB_upstream_variant |
| rs1395113889 | intron_variant                                                                                    |
| rs1395139124 | intron_variant,genic_upstream_transcript_variant                                                  |
| rs1395181621 | intron_variant,genic_downstream_transcript_variant                                                |
| rs1395206293 | intron_variant,genic_upstream_transcript_variant                                                  |
| rs1395265340 | intron_variant                                                                                    |
| rs1395279142 | intron_variant                                                                                    |
| rs1395299343 | intron_variant,genic_upstream_transcript_variant                                                  |
| rs1395333171 | intron_variant                                                                                    |
| rs1395357475 | intron_variant,genic_downstream_transcript_variant                                                |
| rs1395357537 | intron_variant                                                                                    |
| rs1395517273 | intron_variant                                                                                    |
| rs1395519589 | intron_variant,genic_upstream_transcript_variant                                                  |
| rs1395523674 | intron_variant,genic_upstream_transcript_variant                                                  |
| rs1395581151 | intron_variant,genic_upstream_transcript_variant                                                  |
| rs1395592378 | intron_variant,genic_downstream_transcript_variant                                                |
| rs1395642953 | intron_variant,genic_upstream_transcript_variant                                                  |
| rs1395687041 | intron_variant                                                                                    |
| rs1395692890 | intron_variant                                                                                    |
| rs1395760932 | upstream_transcript_variant,intron_variant,genic_upstream_transcript_variant,2KB_upstream_variant |
| rs1395775084 | intron_variant                                                                                    |
| rs1395804138 | intron_variant,genic_upstream_transcript_variant                                                  |
| rs1395862494 | intron_variant,genic_upstream_transcript_variant                                                  |
| rs1395897044 | intron_variant,genic_upstream_transcript_variant                                                  |
| rs1395901955 | intron_variant                                                                                    |
| rs1395921645 | intron_variant                                                                                    |
| rs1395922943 | intron_variant,genic_downstream_transcript_variant                                                |
| rs1395924398 | intron_variant                                                                                    |
| rs1395984612 | intron_variant                                                                                    |
| rs1395995307 | intron_variant,genic_upstream_transcript_variant                                                  |
| rs1396075295 | upstream_transcript_variant,intron_variant,genic_upstream_transcript_variant,2KB_upstream_variant |
| rs1396143056 | intron_variant,genic_downstream_transcript_variant                                                |
| rs1396170556 | intron_variant                                                                                    |
| rs1396223664 | intron_variant                                                                                    |
| rs1396274963 | upstream_transcript_variant,intron_variant,genic_upstream_transcript_variant,2KB_upstream_variant |
| rs1396297602 | intron_variant,genic_upstream_transcript_variant                                                  |
| rs1396299962 | intron_variant,genic_downstream_transcript_variant                                                |
| rs1396323039 | intron_variant                                                                                    |
| rs1396363918 | intron_variant,genic_upstream_transcript_variant                                                  |
| rs1396385102 | intron_variant                                                                                    |
| rs1396423002 | upstream_transcript_variant,intron_variant,genic_upstream_transcript_variant,2KB_upstream_variant |
| rs1396435945 | intron_variant,genic_upstream_transcript_variant                                                  |
| rs1396436522 | intron_variant                                                                                    |
| rs1396493554 | intron_variant,genic_upstream_transcript_variant                                                  |
| rs1396527808 | intron_variant,genic_upstream_transcript_variant                                                  |
| rs1396576070 | intron_variant                                                                                    |
| rs1396664478 | intron_variant,genic_downstream_transcript_variant                                                |
| rs1396683493 | intron_variant                                                                                    |
| rs1396701351 | intron_variant,genic_upstream_transcript_variant                                                  |
| rs1396740952 | intron_variant                                                                                    |
| rs1396745115 | intron_variant,genic_downstream_transcript_variant                                                |
| rs1396752765 | intron_variant,genic_downstream_transcript_variant                                                |
| rs1396776719 | genic_upstream_transcript_variant,intron_variant                                                  |
| rs1396794558 | genic_upstream_transcript_variant,intron_variant                                                  |
| rs1396875725 | intron_variant                                                                                    |
| rs1396897770 | genic_upstream_transcript_variant,intron_variant                                                  |
| rs1396993395 | genic_downstream_transcript_variant,intron_variant                                                |
| rs1396999546 | genic_downstream_transcript_variant,intron_variant                                                |
| rs1397038390 | genic_upstream_transcript_variant,intron_variant                                                  |
| rs1397043697 | genic_upstream_transcript_variant,intron_variant                                                  |
| rs1397073927 | genic_upstream_transcript_variant,intron_variant                                                  |
| rs1397081075 | intron_variant                                                                                    |
| rs1397106571 | genic_downstream_transcript_variant,intron_variant                                                |
| rs1397114258 | genic_downstream_transcript_variant,intron_variant                                                |
| rs1397140271 | genic_upstream_transcript_variant,intron_variant                                                  |
| rs1397190387 | genic_upstream_transcript_variant,intron_variant,2KB_upstream_variant,upstream_transcript_variant |
| rs1397219098 | intron_variant                                                                                    |
| rs1397237824 | genic_downstream_transcript_variant,intron_variant                                                |
| rs1397246785 | genic_upstream_transcript_variant,intron_variant                                                  |
| rs1397283936 | intron_variant                                                                                    |
| rs1397364142 | genic_downstream_transcript_variant,intron_variant                                                |

|              |                                                                                                   |
|--------------|---------------------------------------------------------------------------------------------------|
| rs1397370375 | genic_downstream_transcript_variant,intron_variant                                                |
| rs1397379383 | splice_acceptor_variant                                                                           |
| rs1397433742 | intron_variant                                                                                    |
| rs1397454094 | genic_upstream_transcript_variant,intron_variant                                                  |
| rs1397463668 | genic_upstream_transcript_variant,intron_variant,2KB_upstream_variant,upstream_transcript_variant |
| rs1397481642 | genic_upstream_transcript_variant,intron_variant                                                  |
| rs1397486422 | genic_downstream_transcript_variant,intron_variant                                                |
| rs1397525688 | intron_variant                                                                                    |
| rs1397525801 | genic_downstream_transcript_variant,3_prime_UTR_variant,non_coding_transcript_variant             |
| rs1397539101 | intron_variant                                                                                    |
| rs1397560319 | intron_variant                                                                                    |
| rs1397583022 | genic_downstream_transcript_variant,intron_variant                                                |
| rs1397666697 | genic_downstream_transcript_variant,intron_variant                                                |
| rs1397709571 | genic_upstream_transcript_variant,intron_variant,2KB_upstream_variant,upstream_transcript_variant |
| rs1397732742 | genic_upstream_transcript_variant,intron_variant                                                  |
| rs1397739698 | genic_downstream_transcript_variant,intron_variant                                                |
| rs1397743685 | genic_upstream_transcript_variant,intron_variant,upstream_transcript_variant                      |
| rs1397796844 | genic_upstream_transcript_variant,intron_variant,upstream_transcript_variant                      |
| rs1397844602 | intron_variant                                                                                    |
| rs1397851383 | genic_upstream_transcript_variant,intron_variant                                                  |
| rs1397861032 | genic_upstream_transcript_variant,intron_variant                                                  |
| rs1397888194 | genic_upstream_transcript_variant,intron_variant                                                  |
| rs1397898796 | intron_variant                                                                                    |
| rs1397937296 | genic_upstream_transcript_variant,intron_variant                                                  |
| rs1397945397 | genic_downstream_transcript_variant,intron_variant                                                |
| rs1397971431 | genic_upstream_transcript_variant,intron_variant,2KB_upstream_variant,upstream_transcript_variant |
| rs1397981108 | genic_upstream_transcript_variant,intron_variant,2KB_upstream_variant,upstream_transcript_variant |
| rs1397996024 | genic_downstream_transcript_variant,intron_variant                                                |
| rs1398002795 | genic_upstream_transcript_variant,intron_variant,upstream_transcript_variant                      |
| rs1398026932 | genic_upstream_transcript_variant,intron_variant                                                  |
| rs1398056510 | intron_variant                                                                                    |
| rs1398063583 | genic_upstream_transcript_variant,intron_variant,upstream_transcript_variant                      |
| rs1398098105 | genic_downstream_transcript_variant,3_prime_UTR_variant,non_coding_transcript_variant             |
| rs1398104958 | intron_variant                                                                                    |
| rs1398127915 | genic_downstream_transcript_variant,intron_variant                                                |
| rs1398180577 | genic_downstream_transcript_variant,intron_variant                                                |
| rs1398215122 | intron_variant                                                                                    |
| rs1398224126 | intron_variant                                                                                    |
| rs139825358  | genic_upstream_transcript_variant,intron_variant                                                  |
| rs1398282604 | genic_upstream_transcript_variant,intron_variant                                                  |
| rs1398289052 | genic_upstream_transcript_variant,intron_variant,2KB_upstream_variant,upstream_transcript_variant |
| rs1398292232 | intron_variant                                                                                    |
| rs1398293033 | intron_variant                                                                                    |
| rs1398339494 | genic_upstream_transcript_variant,intron_variant                                                  |
| rs1398418585 | intron_variant                                                                                    |
| rs1398420227 | genic_upstream_transcript_variant,intron_variant                                                  |
| rs1398452089 | intron_variant                                                                                    |
| rs1398457521 | genic_upstream_transcript_variant,intron_variant                                                  |
| rs1398473599 | intron_variant                                                                                    |
| rs1398484254 | genic_upstream_transcript_variant,intron_variant                                                  |
| rs1398575273 | intron_variant                                                                                    |
| rs1398582671 | genic_upstream_transcript_variant,intron_variant                                                  |
| rs1398589576 | genic_upstream_transcript_variant,intron_variant                                                  |
| rs1398612320 | genic_downstream_transcript_variant,intron_variant                                                |
| rs1398685464 | intron_variant                                                                                    |
| rs1398709370 | genic_downstream_transcript_variant,intron_variant                                                |
| rs1398713358 | genic_upstream_transcript_variant,intron_variant                                                  |
| rs1398785484 | genic_downstream_transcript_variant,intron_variant                                                |
| rs1398816615 | genic_upstream_transcript_variant,intron_variant                                                  |
| rs1398819393 | genic_upstream_transcript_variant,intron_variant                                                  |
| rs1398845800 | genic_upstream_transcript_variant,intron_variant                                                  |
| rs1398896443 | genic_upstream_transcript_variant,intron_variant                                                  |
| rs1398903280 | genic_upstream_transcript_variant,intron_variant                                                  |
| rs1398938962 | genic_upstream_transcript_variant,intron_variant                                                  |
| rs1398957115 | genic_downstream_transcript_variant,intron_variant                                                |
| rs1398963779 | genic_upstream_transcript_variant,intron_variant                                                  |
| rs1399040652 | genic_upstream_transcript_variant,intron_variant                                                  |
| rs1399041725 | genic_upstream_transcript_variant,intron_variant                                                  |
| rs1399047858 | genic_upstream_transcript_variant,intron_variant                                                  |
| rs1399068291 | genic_upstream_transcript_variant,intron_variant,2KB_upstream_variant,upstream_transcript_variant |
| rs1399090336 | intron_variant                                                                                    |
| rs1399171071 | intron_variant                                                                                    |
| rs1399210476 | genic_upstream_transcript_variant,intron_variant                                                  |
| rs1399225087 | intron_variant                                                                                    |

|              |                                                                                                   |
|--------------|---------------------------------------------------------------------------------------------------|
| rs1399247454 | genic_upstream_transcript_variant,intron_variant                                                  |
| rs1399262460 | intron_variant                                                                                    |
| rs1399264024 | intron_variant                                                                                    |
| rs1399270343 | intron_variant                                                                                    |
| rs1399276258 | genic_downstream_transcript_variant,intron_variant                                                |
| rs1399308676 | genic_downstream_transcript_variant,3_prime_UTR_variant,non_coding_transcript_variant             |
| rs1399336597 | intron_variant                                                                                    |
| rs1399349778 | genic_upstream_transcript_variant,intron_variant                                                  |
| rs1399350541 | intron_variant                                                                                    |
| rs1399463760 | genic_downstream_transcript_variant,3_prime_UTR_variant,non_coding_transcript_variant             |
| rs1399541508 | genic_downstream_transcript_variant,intron_variant                                                |
| rs1399542264 | genic_upstream_transcript_variant,intron_variant                                                  |
| rs1399555312 | intron_variant                                                                                    |
| rs1399556261 | intron_variant                                                                                    |
| rs1399601631 | genic_upstream_transcript_variant,intron_variant                                                  |
| rs1399610063 | genic_downstream_transcript_variant,intron_variant                                                |
| rs1399630402 | intron_variant                                                                                    |
| rs1399651611 | genic_upstream_transcript_variant,intron_variant                                                  |
| rs1399691058 | genic_upstream_transcript_variant,intron_variant                                                  |
| rs1399734837 | intron_variant                                                                                    |
| rs1399744800 | genic_downstream_transcript_variant,intron_variant,downstream_transcript_variant                  |
| rs1399779759 | genic_downstream_transcript_variant,intron_variant                                                |
| rs1399798369 | coding_sequence_variant,missense_variant,non_coding_transcript_variant                            |
| rs1399804096 | intron_variant                                                                                    |
| rs1399815677 | genic_upstream_transcript_variant,intron_variant                                                  |
| rs1399845684 | genic_upstream_transcript_variant,intron_variant                                                  |
| rs1399920328 | genic_downstream_transcript_variant,intron_variant                                                |
| rs1399923800 | intron_variant                                                                                    |
| rs140006951  | intron_variant                                                                                    |
| rs1400011582 | genic_upstream_transcript_variant,intron_variant                                                  |
| rs1400049256 | genic_upstream_transcript_variant,intron_variant                                                  |
| rs1400054224 | genic_downstream_transcript_variant,intron_variant                                                |
| rs1400061840 | genic_upstream_transcript_variant,intron_variant                                                  |
| rs1400078960 | intron_variant                                                                                    |
| rs1400115104 | intron_variant                                                                                    |
| rs1400146578 | intron_variant                                                                                    |
| rs1400152335 | genic_upstream_transcript_variant,intron_variant,2KB_upstream_variant,upstream_transcript_variant |
| rs1400165846 | intron_variant                                                                                    |
| rs1400265010 | intron_variant                                                                                    |
| rs1400314541 | intron_variant                                                                                    |
| rs1400319231 | intron_variant                                                                                    |
| rs1400494495 | genic_upstream_transcript_variant,intron_variant                                                  |
| rs1400528124 | intron_variant                                                                                    |
| rs1400579016 | genic_downstream_transcript_variant,intron_variant                                                |
| rs1400601138 | intron_variant                                                                                    |
| rs1400697668 | genic_downstream_transcript_variant,intron_variant                                                |
| rs1400704152 | intron_variant                                                                                    |
| rs1400718885 | genic_upstream_transcript_variant,intron_variant                                                  |
| rs1400768221 | genic_upstream_transcript_variant,intron_variant                                                  |
| rs1400771555 | genic_downstream_transcript_variant,intron_variant                                                |
| rs1400781732 | genic_upstream_transcript_variant,intron_variant,upstream_transcript_variant                      |
| rs1400782170 | genic_upstream_transcript_variant,intron_variant                                                  |
| rs1400784733 | intron_variant                                                                                    |
| rs1400850827 | genic_upstream_transcript_variant,intron_variant,upstream_transcript_variant                      |
| rs1400860408 | genic_upstream_transcript_variant,intron_variant                                                  |
| rs1400902854 | intron_variant                                                                                    |
| rs1400907482 | intron_variant                                                                                    |
| rs1400940130 | intron_variant                                                                                    |
| rs1400971832 | genic_downstream_transcript_variant,intron_variant                                                |
| rs1400978209 | intron_variant                                                                                    |
| rs1400988119 | intron_variant                                                                                    |
| rs1401024274 | genic_upstream_transcript_variant,intron_variant                                                  |
| rs1401030161 | intron_variant                                                                                    |
| rs1401089255 | intron_variant                                                                                    |
| rs1401138460 | coding_sequence_variant,missense_variant,non_coding_transcript_variant                            |
| rs1401166174 | genic_downstream_transcript_variant,intron_variant                                                |
| rs1401253924 | genic_upstream_transcript_variant,intron_variant                                                  |
| rs1401290558 | intron_variant                                                                                    |
| rs1401296933 | genic_upstream_transcript_variant,intron_variant                                                  |
| rs1401299513 | intron_variant                                                                                    |
| rs1401320870 | genic_upstream_transcript_variant,intron_variant,upstream_transcript_variant                      |
| rs1401348506 | genic_upstream_transcript_variant,intron_variant                                                  |
| rs1401357145 | genic_upstream_transcript_variant,intron_variant                                                  |
| rs1401393203 | genic_upstream_transcript_variant,intron_variant,2KB_upstream_variant,upstream_transcript_variant |

|              |                                                                                                            |
|--------------|------------------------------------------------------------------------------------------------------------|
| rs1401415452 | intron_variant                                                                                             |
| rs1401438772 | intron_variant                                                                                             |
| rs1401474245 | intron_variant                                                                                             |
| rs1401474552 | genic_downstream_transcript_variant,intron_variant                                                         |
| rs1401513640 | genic_upstream_transcript_variant,intron_variant                                                           |
| rs1401620046 | genic_downstream_transcript_variant,intron_variant                                                         |
| rs1401629190 | genic_upstream_transcript_variant,intron_variant                                                           |
| rs1401636710 | genic_upstream_transcript_variant,intron_variant                                                           |
| rs1401653678 | genic_upstream_transcript_variant,intron_variant                                                           |
| rs1401671481 | genic_downstream_transcript_variant,intron_variant                                                         |
| rs1401700111 | genic_downstream_transcript_variant,intron_variant                                                         |
| rs1401728449 | genic_downstream_transcript_variant,3_prime_UTR_variant,non_coding_transcript_variant                      |
| rs1401756364 | genic_upstream_transcript_variant,intron_variant,upstream_transcript_variant                               |
| rs1401765810 | genic_upstream_transcript_variant,intron_variant                                                           |
| rs1401842053 | genic_upstream_transcript_variant,intron_variant                                                           |
| rs1401842100 | intron_variant                                                                                             |
| rs1401848948 | genic_upstream_transcript_variant,intron_variant,2KB_upstream_variant,upstream_transcript_variant          |
| rs1401890456 | genic_upstream_transcript_variant,intron_variant                                                           |
| rs1401917880 | genic_upstream_transcript_variant,intron_variant                                                           |
| rs1401931585 | genic_upstream_transcript_variant,intron_variant                                                           |
| rs1401942989 | intron_variant                                                                                             |
| rs1402062262 | genic_upstream_transcript_variant,intron_variant                                                           |
| rs1402078503 | genic_upstream_transcript_variant,intron_variant,upstream_transcript_variant                               |
| rs1402089605 | genic_upstream_transcript_variant,intron_variant                                                           |
| rs1402126322 | intron_variant                                                                                             |
| rs1402168154 | intron_variant                                                                                             |
| rs1402177081 | genic_upstream_transcript_variant,intron_variant                                                           |
| rs1402213895 | intron_variant                                                                                             |
| rs1402228351 | genic_upstream_transcript_variant,intron_variant                                                           |
| rs1402247015 | genic_upstream_transcript_variant,intron_variant                                                           |
| rs1402255562 | genic_downstream_transcript_variant,intron_variant                                                         |
| rs1402344381 | genic_upstream_transcript_variant,intron_variant                                                           |
| rs1402358414 | genic_downstream_transcript_variant,intron_variant                                                         |
| rs1402363842 | genic_upstream_transcript_variant,intron_variant                                                           |
| rs1402366432 | genic_upstream_transcript_variant,intron_variant                                                           |
| rs1402419587 | intron_variant                                                                                             |
| rs1402419977 | intron_variant                                                                                             |
| rs1402426825 | genic_upstream_transcript_variant,intron_variant                                                           |
| rs1402442649 | intron_variant                                                                                             |
| rs1402451619 | genic_upstream_transcript_variant,intron_variant                                                           |
| rs1402485042 | genic_upstream_transcript_variant,intron_variant                                                           |
| rs1402503967 | genic_downstream_transcript_variant,coding_sequence_variant,missense_variant,non_coding_transcript_variant |
| rs1402504699 | genic_upstream_transcript_variant,intron_variant                                                           |
| rs1402518966 | genic_upstream_transcript_variant,intron_variant                                                           |
| rs1402527598 | genic_upstream_transcript_variant,intron_variant                                                           |
| rs1402529434 | genic_downstream_transcript_variant,intron_variant                                                         |
| rs1402555312 | intron_variant                                                                                             |
| rs1402584222 | genic_upstream_transcript_variant,intron_variant                                                           |
| rs1402597855 | intron_variant                                                                                             |
| rs1402599741 | intron_variant                                                                                             |
| rs1402653699 | genic_upstream_transcript_variant,intron_variant                                                           |
| rs1402661125 | intron_variant                                                                                             |
| rs1402662402 | genic_downstream_transcript_variant,intron_variant                                                         |
| rs1402663467 | intron_variant                                                                                             |
| rs1402663741 | intron_variant                                                                                             |
| rs1402663951 | intron_variant                                                                                             |
| rs1402679515 | genic_upstream_transcript_variant,intron_variant                                                           |
| rs1402699936 | genic_downstream_transcript_variant,intron_variant                                                         |
| rs1402714522 | genic_upstream_transcript_variant,intron_variant                                                           |
| rs1402746532 | genic_downstream_transcript_variant,3_prime_UTR_variant,non_coding_transcript_variant                      |
| rs1402754217 | genic_upstream_transcript_variant,intron_variant,upstream_transcript_variant                               |
| rs1402788042 | genic_downstream_transcript_variant,intron_variant                                                         |
| rs1402818786 | intron_variant                                                                                             |
| rs1402828262 | intron_variant                                                                                             |
| rs1402831493 | intron_variant                                                                                             |
| rs1402875941 | genic_upstream_transcript_variant,intron_variant                                                           |
| rs1402898507 | genic_upstream_transcript_variant,intron_variant                                                           |
| rs1402909043 | genic_upstream_transcript_variant,intron_variant                                                           |
| rs1402910964 | intron_variant                                                                                             |
| rs1402960587 | intron_variant                                                                                             |
| rs1402999757 | genic_upstream_transcript_variant,intron_variant                                                           |
| rs1403002682 | genic_upstream_transcript_variant,intron_variant,upstream_transcript_variant                               |
| rs1403063008 | genic_upstream_transcript_variant,intron_variant                                                           |
| rs1403096549 | intron_variant                                                                                             |

|              |                                                                                                   |
|--------------|---------------------------------------------------------------------------------------------------|
| rs1403121735 | genic_downstream_transcript_variant,intron_variant                                                |
| rs1403127976 | genic_upstream_transcript_variant,intron_variant                                                  |
| rs1403151290 | genic_upstream_transcript_variant,intron_variant,2KB_upstream_variant,upstream_transcript_variant |
| rs1403156551 | intron_variant                                                                                    |
| rs1403177208 | genic_downstream_transcript_variant,intron_variant                                                |
| rs1403190223 | genic_upstream_transcript_variant,intron_variant                                                  |
| rs1403223634 | intron_variant                                                                                    |
| rs1403237125 | genic_downstream_transcript_variant,intron_variant                                                |
| rs1403246310 | intron_variant                                                                                    |
| rs1403261908 | intron_variant                                                                                    |
| rs1403289841 | intron_variant                                                                                    |
| rs1403316374 | intron_variant                                                                                    |
| rs1403329924 | genic_upstream_transcript_variant,intron_variant                                                  |
| rs1403354032 | genic_downstream_transcript_variant,intron_variant                                                |
| rs1403372645 | genic_downstream_transcript_variant,intron_variant                                                |
| rs1403388670 | genic_upstream_transcript_variant,intron_variant                                                  |
| rs1403393822 | intron_variant                                                                                    |
| rs1403422565 | intron_variant                                                                                    |
| rs1403424653 | intron_variant                                                                                    |
| rs1403468253 | genic_upstream_transcript_variant,intron_variant                                                  |
| rs1403495982 | intron_variant                                                                                    |
| rs1403508414 | genic_upstream_transcript_variant,intron_variant                                                  |
| rs1403635061 | genic_upstream_transcript_variant,intron_variant                                                  |
| rs1403657655 | intron_variant                                                                                    |
| rs1403719773 | intron_variant                                                                                    |
| rs1403741537 | intron_variant                                                                                    |
| rs1403793431 | genic_downstream_transcript_variant,intron_variant                                                |
| rs1403795037 | intron_variant                                                                                    |
| rs1403840707 | genic_upstream_transcript_variant,intron_variant                                                  |
| rs1403856425 | intron_variant                                                                                    |
| rs1403864326 | genic_upstream_transcript_variant,intron_variant                                                  |
| rs1403887434 | intron_variant                                                                                    |
| rs1403901306 | genic_downstream_transcript_variant,intron_variant                                                |
| rs1403933327 | genic_upstream_transcript_variant,intron_variant                                                  |
| rs1403950811 | intron_variant                                                                                    |
| rs1403978051 | intron_variant                                                                                    |
| rs1403996664 | genic_upstream_transcript_variant,intron_variant                                                  |
| rs1403999086 | genic_downstream_transcript_variant,intron_variant                                                |
| rs1404048688 | genic_upstream_transcript_variant,intron_variant                                                  |
| rs1404073539 | genic_upstream_transcript_variant,intron_variant                                                  |
| rs1404119190 | intron_variant                                                                                    |
| rs1404140529 | genic_downstream_transcript_variant,intron_variant                                                |
| rs1404149659 | genic_upstream_transcript_variant,intron_variant                                                  |
| rs1404157832 | coding_sequence_variant,missense_variant,non_coding_transcript_variant                            |
| rs1404205667 | genic_upstream_transcript_variant,intron_variant                                                  |
| rs1404211585 | intron_variant                                                                                    |
| rs1404222846 | genic_upstream_transcript_variant,intron_variant                                                  |
| rs1404228616 | genic_upstream_transcript_variant,intron_variant                                                  |
| rs1404249213 | genic_upstream_transcript_variant,intron_variant                                                  |
| rs1404270987 | genic_downstream_transcript_variant,intron_variant                                                |
| rs1404358656 | genic_upstream_transcript_variant,intron_variant                                                  |
| rs1404368926 | genic_downstream_transcript_variant,intron_variant                                                |
| rs1404382281 | intron_variant                                                                                    |
| rs1404385206 | intron_variant                                                                                    |
| rs1404391420 | intron_variant                                                                                    |
| rs1404400198 | intron_variant                                                                                    |
| rs1404448573 | genic_upstream_transcript_variant,intron_variant                                                  |
| rs1404481890 | genic_upstream_transcript_variant,intron_variant                                                  |
| rs1404502692 | genic_downstream_transcript_variant,intron_variant                                                |
| rs1404521953 | intron_variant                                                                                    |
| rs1404524774 | genic_upstream_transcript_variant,intron_variant                                                  |
| rs1404557562 | genic_downstream_transcript_variant,intron_variant                                                |
| rs1404557904 | genic_upstream_transcript_variant,intron_variant                                                  |
| rs140458968  | genic_upstream_transcript_variant,intron_variant                                                  |
| rs1404610035 | genic_downstream_transcript_variant,intron_variant                                                |
| rs1404611923 | genic_downstream_transcript_variant,intron_variant                                                |
| rs1404642938 | intron_variant                                                                                    |
| rs1404644873 | intron_variant                                                                                    |
| rs1404664878 | coding_sequence_variant,missense_variant,non_coding_transcript_variant                            |
| rs1404669620 | genic_upstream_transcript_variant,intron_variant                                                  |
| rs1404701545 | genic_upstream_transcript_variant,intron_variant                                                  |
| rs1404754489 | genic_downstream_transcript_variant,intron_variant                                                |
| rs1404769803 | genic_upstream_transcript_variant,intron_variant,upstream_transcript_variant                      |
| rs1404770724 | genic_upstream_transcript_variant,intron_variant                                                  |

|              |                                                                                                   |
|--------------|---------------------------------------------------------------------------------------------------|
| rs1404868702 | genic_upstream_transcript_variant,intron_variant,2KB_upstream_variant,upstream_transcript_variant |
| rs1404944327 | intron_variant                                                                                    |
| rs1404976765 | intron_variant                                                                                    |
| rs1405065544 | intron_variant                                                                                    |
| rs1405133922 | genic_upstream_transcript_variant,intron_variant                                                  |
| rs1405135998 | genic_upstream_transcript_variant,intron_variant                                                  |
| rs1405145346 | genic_upstream_transcript_variant,intron_variant                                                  |
| rs1405198664 | genic_upstream_transcript_variant,intron_variant                                                  |
| rs1405217794 | genic_upstream_transcript_variant,intron_variant,upstream_transcript_variant                      |
| rs1405241317 | intron_variant                                                                                    |
| rs1405275048 | intron_variant                                                                                    |
| rs1405368883 | genic_downstream_transcript_variant,intron_variant                                                |
| rs1405398824 | genic_downstream_transcript_variant,intron_variant                                                |
| rs1405405272 | genic_downstream_transcript_variant,intron_variant                                                |
| rs1405445793 | genic_upstream_transcript_variant,intron_variant                                                  |
| rs1405470971 | intron_variant                                                                                    |
| rs1405530230 | genic_downstream_transcript_variant,3_prime_UTR_variant,non_coding_transcript_variant             |
| rs1405646437 | genic_upstream_transcript_variant,intron_variant                                                  |
| rs1405684941 | genic_downstream_transcript_variant,intron_variant                                                |
| rs1405687873 | genic_upstream_transcript_variant,intron_variant                                                  |
| rs1405717731 | genic_downstream_transcript_variant,intron_variant                                                |
| rs1405720332 | intron_variant                                                                                    |
| rs1405723345 | genic_upstream_transcript_variant,intron_variant                                                  |
| rs1405793633 | genic_downstream_transcript_variant,intron_variant                                                |
| rs1405799810 | genic_downstream_transcript_variant,intron_variant                                                |
| rs1405802049 | intron_variant                                                                                    |
| rs1405848769 | genic_upstream_transcript_variant,intron_variant                                                  |
| rs1405892315 | intron_variant                                                                                    |
| rs1405913973 | intron_variant                                                                                    |
| rs1405988381 | genic_upstream_transcript_variant,intron_variant                                                  |
| rs1406010807 | genic_upstream_transcript_variant,intron_variant                                                  |
| rs1406015175 | genic_upstream_transcript_variant,intron_variant                                                  |
| rs1406051361 | intron_variant                                                                                    |
| rs1406081347 | genic_upstream_transcript_variant,intron_variant                                                  |
| rs1406084651 | intron_variant                                                                                    |
| rs1406099770 | intron_variant                                                                                    |
| rs1406119507 | genic_upstream_transcript_variant,5_prime_UTR_variant,intron_variant,upstream_transcript_variant  |
| rs1406160567 | genic_downstream_transcript_variant,intron_variant                                                |
| rs1406165600 | intron_variant                                                                                    |
| rs1406254208 | genic_downstream_transcript_variant,intron_variant                                                |
| rs1406266599 | intron_variant                                                                                    |
| rs1406300427 | genic_upstream_transcript_variant,intron_variant,upstream_transcript_variant                      |
| rs1406315678 | intron_variant                                                                                    |
| rs1406323885 | intron_variant                                                                                    |
| rs1406345426 | intron_variant                                                                                    |
| rs1406352796 | genic_upstream_transcript_variant,intron_variant,upstream_transcript_variant                      |
| rs1406399745 | intron_variant                                                                                    |
| rs1406412610 | genic_upstream_transcript_variant,intron_variant                                                  |
| rs1406435985 | intron_variant                                                                                    |
| rs1406444235 | genic_upstream_transcript_variant,intron_variant                                                  |
| rs1406512018 | genic_upstream_transcript_variant,intron_variant                                                  |
| rs1406551909 | genic_downstream_transcript_variant,intron_variant                                                |
| rs1406571582 | intron_variant                                                                                    |
| rs1406593098 | intron_variant                                                                                    |
| rs1406593131 | genic_upstream_transcript_variant,intron_variant                                                  |
| rs1406618410 | genic_upstream_transcript_variant,intron_variant                                                  |
| rs1406629732 | genic_upstream_transcript_variant,intron_variant                                                  |
| rs1406817029 | genic_downstream_transcript_variant,3_prime_UTR_variant,non_coding_transcript_variant             |
| rs1406831574 | intron_variant                                                                                    |
| rs1406889695 | genic_upstream_transcript_variant,intron_variant                                                  |
| rs1406901812 | genic_upstream_transcript_variant,intron_variant                                                  |
| rs1406927755 | genic_upstream_transcript_variant,intron_variant                                                  |
| rs1406951205 | genic_downstream_transcript_variant,intron_variant                                                |
| rs1407032044 | intron_variant                                                                                    |
| rs1407064292 | intron_variant                                                                                    |
| rs1407076118 | intron_variant                                                                                    |
| rs1407087270 | genic_upstream_transcript_variant,intron_variant                                                  |
| rs1407091744 | intron_variant                                                                                    |
| rs1407199518 | genic_upstream_transcript_variant,intron_variant                                                  |
| rs1407216678 | genic_downstream_transcript_variant,intron_variant                                                |
| rs1407252678 | genic_downstream_transcript_variant,intron_variant                                                |
| rs1407336963 | genic_upstream_transcript_variant,intron_variant,2KB_upstream_variant,upstream_transcript_variant |
| rs1407358466 | genic_upstream_transcript_variant,intron_variant                                                  |
| rs1407368886 | intron_variant                                                                                    |

|              |                                                                                                   |
|--------------|---------------------------------------------------------------------------------------------------|
| rs1407383609 | genic_downstream_transcript_variant,intron_variant                                                |
| rs1407399030 | genic_upstream_transcript_variant,intron_variant,upstream_transcript_variant                      |
| rs1407428091 | genic_upstream_transcript_variant,intron_variant                                                  |
| rs1407456891 | genic_upstream_transcript_variant,intron_variant                                                  |
| rs1407523075 | genic_upstream_transcript_variant,intron_variant                                                  |
| rs1407538714 | genic_upstream_transcript_variant,intron_variant                                                  |
| rs1407577477 | genic_downstream_transcript_variant,intron_variant                                                |
| rs1407586096 | genic_downstream_transcript_variant,intron_variant                                                |
| rs1407617054 | genic_upstream_transcript_variant,intron_variant                                                  |
| rs1407641271 | genic_downstream_transcript_variant,intron_variant                                                |
| rs1407682776 | intron_variant                                                                                    |
| rs1407683359 | intron_variant                                                                                    |
| rs1407695373 | genic_upstream_transcript_variant,intron_variant                                                  |
| rs1407702066 | intron_variant                                                                                    |
| rs1407763259 | intron_variant                                                                                    |
| rs1407769251 | intron_variant                                                                                    |
| rs1407801698 | genic_upstream_transcript_variant,intron_variant                                                  |
| rs1407855004 | genic_downstream_transcript_variant,intron_variant                                                |
| rs1407868841 | genic_upstream_transcript_variant,intron_variant                                                  |
| rs1407874753 | intron_variant                                                                                    |
| rs1407905265 | genic_upstream_transcript_variant,intron_variant                                                  |
| rs1407912510 | genic_upstream_transcript_variant,intron_variant                                                  |
| rs1407944805 | genic_downstream_transcript_variant,intron_variant                                                |
| rs1407970053 | 5_prime_UTR_variant,coding_sequence_variant,synonymous_variant,non_coding_transcript_variant      |
| rs1407973213 | intron_variant                                                                                    |
| rs1407986000 | genic_upstream_transcript_variant,intron_variant                                                  |
| rs1408010919 | intron_variant                                                                                    |
| rs1408020593 | genic_upstream_transcript_variant,intron_variant                                                  |
| rs1408040941 | intron_variant                                                                                    |
| rs1408052284 | intron_variant                                                                                    |
| rs1408156878 | genic_upstream_transcript_variant,intron_variant                                                  |
| rs1408178237 | genic_upstream_transcript_variant,intron_variant,upstream_transcript_variant                      |
| rs1408191707 | genic_upstream_transcript_variant,intron_variant                                                  |
| rs1408230169 | genic_upstream_transcript_variant,intron_variant                                                  |
| rs1408247934 | genic_upstream_transcript_variant,intron_variant                                                  |
| rs1408288276 | genic_downstream_transcript_variant,intron_variant                                                |
| rs1408336470 | intron_variant                                                                                    |
| rs1408341452 | genic_upstream_transcript_variant,intron_variant,2KB_upstream_variant,upstream_transcript_variant |
| rs1408406328 | genic_upstream_transcript_variant,intron_variant                                                  |
| rs1408411636 | genic_upstream_transcript_variant,intron_variant                                                  |
| rs1408419351 | genic_downstream_transcript_variant,intron_variant                                                |
| rs1408477450 | genic_downstream_transcript_variant,intron_variant                                                |
| rs1408481977 | intron_variant                                                                                    |
| rs1408515246 | genic_upstream_transcript_variant,intron_variant                                                  |
| rs1408528857 | intron_variant                                                                                    |
| rs1408539401 | genic_upstream_transcript_variant,intron_variant                                                  |
| rs1408546040 | intron_variant                                                                                    |
| rs1408546075 | genic_upstream_transcript_variant,intron_variant                                                  |
| rs1408603216 | intron_variant                                                                                    |
| rs1408615767 | intron_variant                                                                                    |
| rs1408631711 | genic_upstream_transcript_variant,intron_variant,2KB_upstream_variant,upstream_transcript_variant |
| rs1408668493 | genic_downstream_transcript_variant,intron_variant                                                |
| rs1408691505 | genic_upstream_transcript_variant,intron_variant                                                  |
| rs1408711856 | genic_upstream_transcript_variant,intron_variant                                                  |
| rs1408734401 | intron_variant                                                                                    |
| rs1408755668 | genic_upstream_transcript_variant,intron_variant                                                  |
| rs1408773691 | genic_upstream_transcript_variant,intron_variant                                                  |
| rs1408776595 | genic_downstream_transcript_variant,3_prime_UTR_variant,non_coding_transcript_variant             |
| rs1408806649 | genic_upstream_transcript_variant,intron_variant                                                  |
| rs1408817208 | genic_upstream_transcript_variant,intron_variant                                                  |
| rs1408828933 | intron_variant                                                                                    |
| rs1408855733 | intron_variant                                                                                    |
| rs1408874725 | genic_upstream_transcript_variant,intron_variant                                                  |
| rs1408907462 | genic_downstream_transcript_variant,intron_variant                                                |
| rs1408956787 | intron_variant                                                                                    |
| rs1408974200 | genic_upstream_transcript_variant,intron_variant                                                  |
| rs1409018322 | intron_variant                                                                                    |
| rs1409022997 | genic_upstream_transcript_variant,intron_variant                                                  |
| rs1409052054 | intron_variant                                                                                    |
| rs1409176560 | genic_upstream_transcript_variant,intron_variant                                                  |
| rs1409226578 | genic_downstream_transcript_variant,intron_variant                                                |
| rs1409253185 | intron_variant                                                                                    |
| rs1409256334 | genic_upstream_transcript_variant,intron_variant                                                  |
| rs1409286948 | genic_upstream_transcript_variant,intron_variant                                                  |

|              |                                                                                                              |
|--------------|--------------------------------------------------------------------------------------------------------------|
| rs1409336181 | intron_variant                                                                                               |
| rs1409375032 | intron_variant,genic_upstream_transcript_variant                                                             |
| rs1409380881 | intron_variant                                                                                               |
| rs1409472143 | intron_variant                                                                                               |
| rs1409479274 | intron_variant                                                                                               |
| rs1409505956 | intron_variant,genic_upstream_transcript_variant                                                             |
| rs1409556438 | intron_variant,genic_upstream_transcript_variant                                                             |
| rs1409566679 | intron_variant,genic_upstream_transcript_variant                                                             |
| rs1409620584 | intron_variant                                                                                               |
| rs1409672945 | intron_variant                                                                                               |
| rs1409677171 | intron_variant,genic_upstream_transcript_variant,upstream_transcript_variant                                 |
| rs1409683864 | intron_variant,genic_downstream_transcript_variant                                                           |
| rs1409742491 | intron_variant                                                                                               |
| rs1409750676 | intron_variant                                                                                               |
| rs1409781866 | intron_variant,genic_upstream_transcript_variant                                                             |
| rs1409813341 | intron_variant,genic_downstream_transcript_variant                                                           |
| rs1409945534 | intron_variant,genic_upstream_transcript_variant                                                             |
| rs1410009532 | intron_variant,genic_upstream_transcript_variant                                                             |
| rs1410013407 | intron_variant                                                                                               |
| rs1410037401 | intron_variant,genic_downstream_transcript_variant                                                           |
| rs1410099782 | intron_variant,genic_upstream_transcript_variant                                                             |
| rs1410100135 | intron_variant,genic_downstream_transcript_variant                                                           |
| rs1410131871 | intron_variant,genic_upstream_transcript_variant                                                             |
| rs1410155882 | intron_variant,genic_upstream_transcript_variant                                                             |
| rs1410215863 | intron_variant                                                                                               |
| rs1410251305 | intron_variant,genic_upstream_transcript_variant                                                             |
| rs1410268441 | intron_variant                                                                                               |
| rs1410278679 | intron_variant,genic_upstream_transcript_variant                                                             |
| rs1410341568 | intron_variant,genic_upstream_transcript_variant                                                             |
| rs1410373280 | intron_variant,genic_upstream_transcript_variant,5_prime_UTR_variant,upstream_transcript_variant             |
| rs1410405814 | intron_variant,genic_upstream_transcript_variant                                                             |
| rs1410433139 | intron_variant,genic_downstream_transcript_variant                                                           |
| rs1410463772 | intron_variant,genic_upstream_transcript_variant                                                             |
| rs1410476910 | intron_variant,genic_upstream_transcript_variant                                                             |
| rs1410506607 | genic_downstream_transcript_variant,non_coding_transcript_variant,3_prime_UTR_variant                        |
| rs1410528382 | intron_variant                                                                                               |
| rs1410556602 | intron_variant,genic_downstream_transcript_variant                                                           |
| rs1410621901 | intron_variant,genic_downstream_transcript_variant                                                           |
| rs1410628296 | intron_variant                                                                                               |
| rs1410639381 | intron_variant                                                                                               |
| rs1410664971 | intron_variant,genic_downstream_transcript_variant                                                           |
| rs1410677667 | intron_variant,genic_downstream_transcript_variant                                                           |
| rs1410744156 | intron_variant,genic_downstream_transcript_variant                                                           |
| rs1410752181 | intron_variant                                                                                               |
| rs1410780061 | intron_variant,genic_upstream_transcript_variant                                                             |
| rs1410805066 | intron_variant,genic_upstream_transcript_variant                                                             |
| rs1410829427 | intron_variant,genic_upstream_transcript_variant                                                             |
| rs1410862430 | intron_variant,genic_downstream_transcript_variant                                                           |
| rs1410882045 | intron_variant,genic_upstream_transcript_variant                                                             |
| rs1410882577 | intron_variant,genic_upstream_transcript_variant                                                             |
| rs1410974324 | intron_variant,genic_upstream_transcript_variant                                                             |
| rs1411011874 | intron_variant,genic_upstream_transcript_variant                                                             |
| rs1411048094 | non_coding_transcript_variant,genic_downstream_transcript_variant,coding_sequence_variant,synonymous_variant |
| rs1411048617 | intron_variant,genic_upstream_transcript_variant                                                             |
| rs1411050715 | intron_variant                                                                                               |
| rs1411127306 | intron_variant,genic_upstream_transcript_variant                                                             |
| rs1411174360 | intron_variant,genic_upstream_transcript_variant                                                             |
| rs1411179958 | intron_variant,genic_upstream_transcript_variant                                                             |
| rs1411228867 | intron_variant,genic_upstream_transcript_variant                                                             |
| rs1411241079 | intron_variant                                                                                               |
| rs1411249020 | 2KB_upstream_variant,intron_variant,genic_upstream_transcript_variant,upstream_transcript_variant            |
| rs1411256225 | intron_variant,genic_upstream_transcript_variant                                                             |
| rs1411270124 | intron_variant,genic_downstream_transcript_variant                                                           |
| rs1411291039 | intron_variant,genic_upstream_transcript_variant                                                             |
| rs1411291766 | intron_variant                                                                                               |
| rs1411293192 | intron_variant                                                                                               |
| rs1411310411 | intron_variant                                                                                               |
| rs1411313532 | intron_variant,genic_upstream_transcript_variant                                                             |
| rs1411368297 | intron_variant                                                                                               |
| rs1411439592 | intron_variant,genic_upstream_transcript_variant                                                             |
| rs1411454216 | intron_variant                                                                                               |
| rs1411536567 | intron_variant,genic_downstream_transcript_variant                                                           |
| rs1411577078 | downstream_transcript_variant,intron_variant,genic_downstream_transcript_variant                             |
| rs1411616925 | intron_variant,genic_upstream_transcript_variant                                                             |

|              |                                                                                                            |
|--------------|------------------------------------------------------------------------------------------------------------|
| rs1411618983 | intron_variant,genic_upstream_transcript_variant                                                           |
| rs1411623614 | intron_variant                                                                                             |
| rs1411664502 | intron_variant,genic_downstream_transcript_variant                                                         |
| rs1411665844 | intron_variant,genic_downstream_transcript_variant                                                         |
| rs1411677371 | intron_variant,genic_upstream_transcript_variant                                                           |
| rs1411713265 | intron_variant                                                                                             |
| rs1411774859 | intron_variant,genic_downstream_transcript_variant                                                         |
| rs1411794757 | intron_variant                                                                                             |
| rs1411806901 | intron_variant                                                                                             |
| rs1411809982 | intron_variant                                                                                             |
| rs1411811436 | intron_variant,genic_upstream_transcript_variant                                                           |
| rs1411813755 | intron_variant                                                                                             |
| rs1411849844 | intron_variant                                                                                             |
| rs1411904121 | intron_variant                                                                                             |
| rs1411926720 | intron_variant                                                                                             |
| rs1411940340 | intron_variant,genic_upstream_transcript_variant                                                           |
| rs1411954415 | intron_variant                                                                                             |
| rs1411994476 | intron_variant,genic_upstream_transcript_variant                                                           |
| rs1412005782 | downstream_transcript_variant,500B_downstream_variant                                                      |
| rs1412009024 | intron_variant,genic_upstream_transcript_variant                                                           |
| rs1412049970 | intron_variant,genic_upstream_transcript_variant                                                           |
| rs1412055504 | intron_variant,genic_upstream_transcript_variant,upstream_transcript_variant                               |
| rs1412071052 | intron_variant                                                                                             |
| rs1412104062 | intron_variant                                                                                             |
| rs1412196289 | 2KB_upstream_variant,intron_variant,genic_upstream_transcript_variant,upstream_transcript_variant          |
| rs1412211697 | intron_variant,genic_upstream_transcript_variant                                                           |
| rs1412217570 | intron_variant,genic_downstream_transcript_variant                                                         |
| rs1412226416 | intron_variant,genic_upstream_transcript_variant                                                           |
| rs1412244178 | intron_variant                                                                                             |
| rs1412310413 | intron_variant,genic_upstream_transcript_variant                                                           |
| rs1412332689 | intron_variant                                                                                             |
| rs1412347312 | intron_variant,genic_upstream_transcript_variant                                                           |
| rs1412353826 | intron_variant                                                                                             |
| rs1412427532 | intron_variant                                                                                             |
| rs1412439892 | intron_variant,genic_downstream_transcript_variant                                                         |
| rs1412506058 | intron_variant,genic_upstream_transcript_variant                                                           |
| rs1412529742 | intron_variant                                                                                             |
| rs1412575531 | intron_variant,genic_downstream_transcript_variant                                                         |
| rs1412584391 | intron_variant                                                                                             |
| rs1412591012 | intron_variant,genic_downstream_transcript_variant                                                         |
| rs1412665799 | intron_variant                                                                                             |
| rs1412671547 | intron_variant,genic_upstream_transcript_variant                                                           |
| rs1412675219 | intron_variant,genic_upstream_transcript_variant                                                           |
| rs1412704223 | intron_variant                                                                                             |
| rs1412713259 | intron_variant,genic_upstream_transcript_variant                                                           |
| rs1412771681 | intron_variant                                                                                             |
| rs1412842857 | intron_variant                                                                                             |
| rs1412869677 | intron_variant,genic_downstream_transcript_variant                                                         |
| rs1412888386 | intron_variant                                                                                             |
| rs1412894899 | intron_variant                                                                                             |
| rs1412969314 | intron_variant,genic_upstream_transcript_variant                                                           |
| rs1413004030 | intron_variant,genic_downstream_transcript_variant                                                         |
| rs1413004914 | intron_variant,genic_upstream_transcript_variant                                                           |
| rs1413043253 | intron_variant                                                                                             |
| rs1413117182 | intron_variant                                                                                             |
| rs1413135472 | intron_variant                                                                                             |
| rs1413162402 | genic_downstream_transcript_variant,non_coding_transcript_variant,3_prime_UTR_variant                      |
| rs1413175228 | intron_variant,genic_upstream_transcript_variant                                                           |
| rs1413209214 | missense_variant,non_coding_transcript_variant,genic_downstream_transcript_variant,coding_sequence_variant |
| rs1413287662 | intron_variant                                                                                             |
| rs1413292436 | intron_variant,genic_upstream_transcript_variant,upstream_transcript_variant                               |
| rs1413298285 | genic_downstream_transcript_variant,non_coding_transcript_variant,3_prime_UTR_variant                      |
| rs1413320599 | intron_variant,5_prime_UTR_variant                                                                         |
| rs1413345204 | intron_variant                                                                                             |
| rs1413350895 | intron_variant,genic_upstream_transcript_variant                                                           |
| rs1413359619 | intron_variant,genic_upstream_transcript_variant                                                           |
| rs1413422494 | intron_variant,genic_downstream_transcript_variant                                                         |
| rs1413430606 | intron_variant                                                                                             |
| rs1413432875 | intron_variant,genic_upstream_transcript_variant                                                           |
| rs1413463929 | intron_variant                                                                                             |
| rs1413494415 | intron_variant,genic_downstream_transcript_variant                                                         |
| rs1413533878 | intron_variant                                                                                             |
| rs1413587945 | intron_variant,genic_upstream_transcript_variant                                                           |
| rs1413659885 | intron_variant                                                                                             |

|              |                                                                                                   |
|--------------|---------------------------------------------------------------------------------------------------|
| rs1413702777 | intron_variant,genic_upstream_transcript_variant                                                  |
| rs1413717778 | intron_variant,genic_downstream_transcript_variant                                                |
| rs1413753927 | intron_variant                                                                                    |
| rs1413777203 | intron_variant                                                                                    |
| rs1413827855 | intron_variant,genic_upstream_transcript_variant                                                  |
| rs1413830523 | intron_variant,genic_upstream_transcript_variant                                                  |
| rs1413851397 | intron_variant,genic_upstream_transcript_variant                                                  |
| rs1413852638 | intron_variant                                                                                    |
| rs1413935839 | intron_variant,genic_upstream_transcript_variant                                                  |
| rs1413956294 | intron_variant,genic_downstream_transcript_variant                                                |
| rs1413967054 | intron_variant                                                                                    |
| rs1414000639 | intron_variant,genic_upstream_transcript_variant                                                  |
| rs1414035564 | 2KB_upstream_variant,intron_variant,genic_upstream_transcript_variant,upstream_transcript_variant |
| rs1414055722 | intron_variant                                                                                    |
| rs1414063006 | intron_variant,genic_upstream_transcript_variant                                                  |
| rs1414067460 | intron_variant,genic_downstream_transcript_variant                                                |
| rs1414093360 | intron_variant,genic_upstream_transcript_variant                                                  |
| rs1414130627 | intron_variant                                                                                    |
| rs1414169070 | intron_variant,genic_upstream_transcript_variant                                                  |
| rs1414187784 | intron_variant,genic_upstream_transcript_variant                                                  |
| rs1414192612 | intron_variant                                                                                    |
| rs1414201606 | intron_variant                                                                                    |
| rs1414209879 | intron_variant                                                                                    |
| rs1414244136 | intron_variant                                                                                    |
| rs1414265289 | intron_variant,genic_upstream_transcript_variant                                                  |
| rs1414281296 | intron_variant                                                                                    |
| rs1414304044 | intron_variant                                                                                    |
| rs1414312808 | intron_variant,genic_downstream_transcript_variant                                                |
| rs1414314940 | intron_variant                                                                                    |
| rs1414341893 | intron_variant,genic_upstream_transcript_variant                                                  |
| rs1414437811 | intron_variant                                                                                    |
| rs1414486907 | intron_variant                                                                                    |
| rs1414509890 | intron_variant,genic_upstream_transcript_variant                                                  |
| rs1414517251 | intron_variant,genic_upstream_transcript_variant                                                  |
| rs1414553866 | intron_variant,genic_upstream_transcript_variant                                                  |
| rs1414565987 | intron_variant                                                                                    |
| rs1414661984 | genic_downstream_transcript_variant,non_coding_transcript_variant,3_prime_UTR_variant             |
| rs1414667581 | intron_variant                                                                                    |
| rs1414682710 | intron_variant                                                                                    |
| rs1414776945 | genic_downstream_transcript_variant,non_coding_transcript_variant,3_prime_UTR_variant             |
| rs1414785019 | intron_variant,genic_upstream_transcript_variant                                                  |
| rs1414787493 | intron_variant                                                                                    |
| rs1414818661 | intron_variant,genic_upstream_transcript_variant                                                  |
| rs1414841619 | intron_variant                                                                                    |
| rs1414849742 | intron_variant,genic_upstream_transcript_variant                                                  |
| rs1414873885 | intron_variant,genic_downstream_transcript_variant                                                |
| rs1414891437 | intron_variant,genic_upstream_transcript_variant                                                  |
| rs1414944239 | intron_variant,genic_upstream_transcript_variant                                                  |
| rs1414952126 | intron_variant                                                                                    |
| rs1414976520 | downstream_transcript_variant,intron_variant,genic_downstream_transcript_variant                  |
| rs1414996029 | intron_variant,genic_upstream_transcript_variant                                                  |
| rs1415015816 | intron_variant,genic_downstream_transcript_variant                                                |
| rs1415033985 | intron_variant,genic_downstream_transcript_variant                                                |
| rs1415059851 | intron_variant,genic_upstream_transcript_variant                                                  |
| rs1415060644 | intron_variant                                                                                    |
| rs1415126344 | intron_variant                                                                                    |
| rs1415131410 | intron_variant                                                                                    |
| rs1415181720 | intron_variant,genic_upstream_transcript_variant                                                  |
| rs1415202298 | intron_variant,genic_upstream_transcript_variant                                                  |
| rs1415212740 | intron_variant                                                                                    |
| rs1415240684 | intron_variant                                                                                    |
| rs1415284898 | intron_variant,genic_upstream_transcript_variant                                                  |
| rs1415289824 | intron_variant                                                                                    |
| rs1415297092 | intron_variant,genic_upstream_transcript_variant                                                  |
| rs1415333678 | intron_variant,genic_upstream_transcript_variant                                                  |
| rs1415353248 | intron_variant                                                                                    |
| rs1415419069 | intron_variant,genic_downstream_transcript_variant                                                |
| rs1415422010 | intron_variant                                                                                    |
| rs1415464623 | intron_variant                                                                                    |
| rs1415468628 | intron_variant                                                                                    |
| rs1415469556 | intron_variant,genic_upstream_transcript_variant                                                  |
| rs1415493708 | intron_variant                                                                                    |
| rs1415495980 | intron_variant,genic_upstream_transcript_variant                                                  |
| rs1415499942 | 2KB_upstream_variant,intron_variant,genic_upstream_transcript_variant,upstream_transcript_variant |

|              |                                                                                                                    |
|--------------|--------------------------------------------------------------------------------------------------------------------|
| rs1415519001 | intron_variant                                                                                                     |
| rs1415521320 | intron_variant                                                                                                     |
| rs1415535318 | intron_variant                                                                                                     |
| rs1415559854 | intron_variant                                                                                                     |
| rs1415579387 | genic_downstream_transcript_variant,non_coding_transcript_variant,3_prime_UTR_variant                              |
| rs1415593157 | intron_variant,genic_upstream_transcript_variant                                                                   |
| rs1415676228 | intron_variant,genic_upstream_transcript_variant                                                                   |
| rs1415684928 | intron_variant                                                                                                     |
| rs1415736844 | genic_downstream_transcript_variant,non_coding_transcript_variant,3_prime_UTR_variant                              |
| rs1415758134 | intron_variant                                                                                                     |
| rs1415764094 | intron_variant,genic_upstream_transcript_variant,upstream_transcript_variant                                       |
| rs1415800304 | intron_variant,genic_downstream_transcript_variant                                                                 |
| rs1415814379 | intron_variant,genic_upstream_transcript_variant,upstream_transcript_variant                                       |
| rs1415832639 | intron_variant                                                                                                     |
| rs1415850287 | intron_variant                                                                                                     |
| rs1415907396 | intron_variant                                                                                                     |
| rs1415911374 | intron_variant,genic_upstream_transcript_variant                                                                   |
| rs1415917924 | intron_variant,genic_downstream_transcript_variant                                                                 |
| rs1415968874 | intron_variant                                                                                                     |
| rs1416039394 | intron_variant,genic_upstream_transcript_variant                                                                   |
| rs1416063440 | intron_variant,genic_upstream_transcript_variant                                                                   |
| rs1416119674 | intron_variant                                                                                                     |
| rs1416153919 | intron_variant                                                                                                     |
| rs1416163597 | intron_variant,genic_upstream_transcript_variant                                                                   |
| rs1416195351 | intron_variant,genic_upstream_transcript_variant                                                                   |
| rs1416195665 | intron_variant                                                                                                     |
| rs1416255127 | intron_variant,genic_upstream_transcript_variant                                                                   |
| rs1416278844 | intron_variant,genic_upstream_transcript_variant,upstream_transcript_variant                                       |
| rs1416331696 | intron_variant,genic_downstream_transcript_variant                                                                 |
| rs1416338233 | intron_variant,genic_upstream_transcript_variant                                                                   |
| rs1416381155 | intron_variant,genic_downstream_transcript_variant                                                                 |
| rs1416396818 | intron_variant,genic_downstream_transcript_variant                                                                 |
| rs1416405144 | intron_variant                                                                                                     |
| rs1416430988 | intron_variant,genic_downstream_transcript_variant                                                                 |
| rs1416492385 | intron_variant,genic_upstream_transcript_variant                                                                   |
| rs1416493228 | intron_variant,genic_downstream_transcript_variant                                                                 |
| rs1416550430 | intron_variant,genic_upstream_transcript_variant                                                                   |
| rs1416603911 | intron_variant,genic_upstream_transcript_variant                                                                   |
| rs1416616452 | intron_variant                                                                                                     |
| rs1416626197 | intron_variant,genic_downstream_transcript_variant                                                                 |
| rs1416649025 | intron_variant,genic_upstream_transcript_variant                                                                   |
| rs1416687412 | 2KB_upstream_variant,intron_variant,genic_upstream_transcript_variant,upstream_transcript_variant                  |
| rs1416737759 | intron_variant,genic_downstream_transcript_variant                                                                 |
| rs1416771369 | intron_variant,genic_downstream_transcript_variant                                                                 |
| rs1416796673 | intron_variant                                                                                                     |
| rs1416818072 | intron_variant,genic_downstream_transcript_variant                                                                 |
| rs1416840107 | intron_variant                                                                                                     |
| rs1416849925 | intron_variant                                                                                                     |
| rs1416864415 | intron_variant,genic_downstream_transcript_variant                                                                 |
| rs1416896139 | intron_variant,genic_upstream_transcript_variant                                                                   |
| rs1416902625 | intron_variant,genic_downstream_transcript_variant                                                                 |
| rs1416923559 | intron_variant,genic_downstream_transcript_variant                                                                 |
| rs1416926865 | intron_variant                                                                                                     |
| rs1416957972 | intron_variant                                                                                                     |
| rs1416982830 | intron_variant                                                                                                     |
| rs1417000432 | intron_variant,genic_upstream_transcript_variant                                                                   |
| rs1417002950 | intron_variant,genic_downstream_transcript_variant                                                                 |
| rs1417010955 | intron_variant                                                                                                     |
| rs1417029911 | intron_variant                                                                                                     |
| rs1417042360 | intron_variant,genic_downstream_transcript_variant                                                                 |
| rs1417128991 | intron_variant,genic_upstream_transcript_variant                                                                   |
| rs1417138027 | stop_gained,coding_sequence_variant,intron_variant,genic_upstream_transcript_variant,non_coding_transcript_variant |
| rs1417141852 | intron_variant,genic_upstream_transcript_variant                                                                   |
| rs1417153919 | intron_variant,genic_downstream_transcript_variant                                                                 |
| rs1417157107 | intron_variant,genic_upstream_transcript_variant                                                                   |
| rs1417185865 | intron_variant                                                                                                     |
| rs1417205891 | intron_variant                                                                                                     |
| rs1417223181 | intron_variant                                                                                                     |
| rs1417240082 | intron_variant,genic_upstream_transcript_variant,upstream_transcript_variant                                       |
| rs1417266255 | intron_variant,genic_downstream_transcript_variant                                                                 |
| rs1417274697 | genic_upstream_transcript_variant,non_coding_transcript_variant,5_prime_UTR_variant,intron_variant                 |
| rs1417290378 | intron_variant                                                                                                     |
| rs1417328102 | intron_variant,genic_downstream_transcript_variant                                                                 |
| rs1417404534 | intron_variant                                                                                                     |

|              |                                                                              |
|--------------|------------------------------------------------------------------------------|
| rs1417411527 | intron_variant                                                               |
| rs1417414218 | intron_variant                                                               |
| rs1417415848 | intron_variant,genic_upstream_transcript_variant                             |
| rs1417419562 | intron_variant                                                               |
| rs1417429880 | intron_variant,genic_upstream_transcript_variant                             |
| rs1417433919 | missense_variant,non_coding_transcript_variant,coding_sequence_variant       |
| rs1417443780 | intron_variant                                                               |
| rs1417467674 | intron_variant,genic_downstream_transcript_variant                           |
| rs1417488476 | intron_variant,genic_upstream_transcript_variant                             |
| rs1417509860 | intron_variant                                                               |
| rs1417517849 | intron_variant,genic_upstream_transcript_variant,upstream_transcript_variant |
| rs1417527868 | intron_variant,genic_upstream_transcript_variant,upstream_transcript_variant |
| rs1417567438 | intron_variant,genic_upstream_transcript_variant,upstream_transcript_variant |
| rs1417571863 | intron_variant,genic_upstream_transcript_variant                             |
| rs1417604262 | intron_variant,genic_upstream_transcript_variant                             |
| rs1417616796 | intron_variant                                                               |
| rs1417635383 | intron_variant,genic_upstream_transcript_variant                             |
| rs1417667928 | intron_variant                                                               |
| rs1417757346 | intron_variant,genic_downstream_transcript_variant                           |
| rs1417767899 | intron_variant                                                               |
| rs1417771839 | intron_variant,genic_downstream_transcript_variant                           |
| rs1417783618 | intron_variant                                                               |
| rs1417814993 | intron_variant                                                               |
| rs1417862132 | intron_variant                                                               |
| rs1417871928 | intron_variant,genic_upstream_transcript_variant                             |
| rs1417900862 | intron_variant,genic_upstream_transcript_variant                             |
| rs1417944268 | intron_variant                                                               |
| rs1417953926 | intron_variant,genic_downstream_transcript_variant                           |
| rs1417975136 | missense_variant,non_coding_transcript_variant,coding_sequence_variant       |
| rs1418009551 | intron_variant,genic_upstream_transcript_variant                             |
| rs1418012091 | intron_variant,genic_downstream_transcript_variant                           |
| rs1418018774 | intron_variant,genic_downstream_transcript_variant                           |
| rs1418035767 | intron_variant,genic_upstream_transcript_variant                             |
| rs1418077355 | intron_variant                                                               |
| rs1418138444 | intron_variant                                                               |
| rs1418168831 | intron_variant                                                               |
| rs1418238539 | intron_variant,genic_upstream_transcript_variant                             |
| rs1418239233 | intron_variant                                                               |
| rs1418262887 | intron_variant,genic_downstream_transcript_variant                           |
| rs1418275091 | intron_variant                                                               |
| rs1418283441 | intron_variant,genic_upstream_transcript_variant                             |
| rs1418288016 | intron_variant,genic_upstream_transcript_variant,upstream_transcript_variant |
| rs1418345175 | intron_variant,genic_upstream_transcript_variant                             |
| rs1418351074 | intron_variant,genic_upstream_transcript_variant                             |
| rs1418362983 | intron_variant                                                               |
| rs1418399135 | intron_variant,genic_upstream_transcript_variant                             |
| rs1418419682 | intron_variant,genic_downstream_transcript_variant                           |
| rs1418461542 | intron_variant,genic_upstream_transcript_variant                             |
| rs1418493673 | intron_variant,genic_upstream_transcript_variant                             |
| rs1418510745 | intron_variant,genic_upstream_transcript_variant                             |
| rs1418531157 | intron_variant,genic_upstream_transcript_variant                             |
| rs1418533620 | intron_variant,genic_downstream_transcript_variant                           |
| rs1418555935 | intron_variant,genic_upstream_transcript_variant                             |
| rs1418577875 | intron_variant,genic_upstream_transcript_variant                             |
| rs1418598096 | intron_variant,genic_upstream_transcript_variant                             |
| rs1418603627 | intron_variant                                                               |
| rs1418609772 | intron_variant                                                               |
| rs1418620881 | intron_variant                                                               |
| rs1418651877 | intron_variant,genic_downstream_transcript_variant                           |
| rs1418680525 | intron_variant                                                               |
| rs1418710509 | intron_variant,genic_upstream_transcript_variant                             |
| rs1418723360 | intron_variant                                                               |
| rs1418767454 | intron_variant,genic_upstream_transcript_variant                             |
| rs1418795078 | intron_variant,genic_downstream_transcript_variant                           |
| rs1418803874 | intron_variant,genic_upstream_transcript_variant                             |
| rs1418808482 | intron_variant,genic_upstream_transcript_variant                             |
| rs1418834705 | intron_variant                                                               |
| rs1418845572 | intron_variant                                                               |
| rs1418863217 | intron_variant,genic_upstream_transcript_variant                             |
| rs1418872940 | intron_variant                                                               |
| rs1418885343 | intron_variant,genic_upstream_transcript_variant                             |
| rs1418960498 | intron_variant,genic_upstream_transcript_variant                             |
| rs1419026302 | intron_variant,genic_upstream_transcript_variant                             |
| rs1419026666 | intron_variant,genic_upstream_transcript_variant                             |

|              |                                                                                                                           |
|--------------|---------------------------------------------------------------------------------------------------------------------------|
| rs1419027249 | intron_variant,genic_downstream_transcript_variant                                                                        |
| rs1419084654 | intron_variant,genic_upstream_transcript_variant                                                                          |
| rs1419096620 | intron_variant                                                                                                            |
| rs1419119600 | intron_variant,genic_upstream_transcript_variant                                                                          |
| rs1419137122 | intron_variant                                                                                                            |
| rs1419160204 | intron_variant                                                                                                            |
| rs1419168165 | intron_variant                                                                                                            |
| rs1419168836 | intron_variant,genic_upstream_transcript_variant                                                                          |
| rs1419204302 | intron_variant                                                                                                            |
| rs1419221783 | intron_variant,genic_upstream_transcript_variant                                                                          |
| rs1419243895 | intron_variant,genic_upstream_transcript_variant                                                                          |
| rs1419255057 | intron_variant                                                                                                            |
| rs1419287447 | intron_variant                                                                                                            |
| rs1419331097 | intron_variant,genic_upstream_transcript_variant                                                                          |
| rs1419361329 | intron_variant,genic_upstream_transcript_variant                                                                          |
| rs1419368770 | intron_variant                                                                                                            |
| rs1419375528 | intron_variant                                                                                                            |
| rs1419398628 | intron_variant,genic_downstream_transcript_variant                                                                        |
| rs1419410377 | intron_variant                                                                                                            |
| rs1419458980 | intron_variant,genic_upstream_transcript_variant                                                                          |
| rs1419522549 | intron_variant                                                                                                            |
| rs1419577403 | intron_variant                                                                                                            |
| rs1419596550 | intron_variant,genic_downstream_transcript_variant                                                                        |
| rs1419597462 | intron_variant                                                                                                            |
| rs1419601909 | intron_variant                                                                                                            |
| rs1419618357 | intron_variant,genic_downstream_transcript_variant                                                                        |
| rs1419651726 | intron_variant,genic_upstream_transcript_variant                                                                          |
| rs1419669081 | intron_variant,genic_upstream_transcript_variant                                                                          |
| rs1419705812 | intron_variant,genic_upstream_transcript_variant                                                                          |
| rs1419794459 | intron_variant                                                                                                            |
| rs1419813849 | intron_variant                                                                                                            |
| rs1419818689 | intron_variant,genic_upstream_transcript_variant                                                                          |
| rs1419868871 | intron_variant                                                                                                            |
| rs1419913735 | intron_variant,genic_upstream_transcript_variant                                                                          |
| rs1419921839 | intron_variant,genic_downstream_transcript_variant                                                                        |
| rs1419922081 | intron_variant                                                                                                            |
| rs1419978372 | intron_variant,genic_upstream_transcript_variant                                                                          |
| rs1419991097 | intron_variant,genic_downstream_transcript_variant                                                                        |
| rs1419994293 | intron_variant                                                                                                            |
| rs1420029545 | intron_variant                                                                                                            |
| rs1420051245 | intron_variant                                                                                                            |
| rs1420064646 | intron_variant                                                                                                            |
| rs1420084269 | intron_variant,genic_upstream_transcript_variant                                                                          |
| rs1420111639 | intron_variant,genic_upstream_transcript_variant                                                                          |
| rs1420122499 | intron_variant,genic_downstream_transcript_variant                                                                        |
| rs1420174204 | intron_variant,genic_upstream_transcript_variant                                                                          |
| rs1420178599 | intron_variant,genic_downstream_transcript_variant                                                                        |
| rs1420201065 | intron_variant,genic_downstream_transcript_variant                                                                        |
| rs1420220785 | intron_variant                                                                                                            |
| rs1420240934 | missense_variant,non_coding_transcript_variant,genic_downstream_transcript_variant,coding_sequence_variant                |
| rs1420250296 | intron_variant,genic_upstream_transcript_variant                                                                          |
| rs1420317257 | intron_variant,genic_upstream_transcript_variant                                                                          |
| rs1420370492 | 2KB_upstream_variant,intron_variant,genic_upstream_transcript_variant,upstream_transcript_variant                         |
| rs1420442950 | intron_variant,genic_upstream_transcript_variant                                                                          |
| rs1420479342 | intron_variant,genic_upstream_transcript_variant                                                                          |
| rs1420519819 | intron_variant,genic_downstream_transcript_variant                                                                        |
| rs1420538067 | intron_variant                                                                                                            |
| rs1420550735 | intron_variant,genic_upstream_transcript_variant                                                                          |
| rs1420555136 | intron_variant                                                                                                            |
| rs1420562525 | intron_variant,genic_upstream_transcript_variant                                                                          |
| rs1420569440 | intron_variant                                                                                                            |
| rs1420586253 | intron_variant,genic_upstream_transcript_variant                                                                          |
| rs1420587961 | intron_variant                                                                                                            |
| rs1420595847 | intron_variant,genic_upstream_transcript_variant                                                                          |
| rs1420649725 | coding_sequence_variant,intron_variant,genic_upstream_transcript_variant,non_coding_transcript_variant,frameshift_variant |
| rs1420667736 | intron_variant                                                                                                            |
| rs1420676728 | intron_variant,genic_upstream_transcript_variant                                                                          |
| rs1420685246 | intron_variant                                                                                                            |
| rs1420685394 | intron_variant,genic_upstream_transcript_variant                                                                          |
| rs1420738047 | intron_variant,genic_upstream_transcript_variant                                                                          |
| rs1420749689 | intron_variant                                                                                                            |
| rs1420776400 | intron_variant,genic_upstream_transcript_variant                                                                          |
| rs1420821729 | intron_variant,genic_downstream_transcript_variant                                                                        |
| rs1420840589 | intron_variant,genic_upstream_transcript_variant,upstream_transcript_variant                                              |

|              |                                                                                                   |
|--------------|---------------------------------------------------------------------------------------------------|
| rs1420851997 | intron_variant,genic_upstream_transcript_variant                                                  |
| rs1420875221 | intron_variant                                                                                    |
| rs1420885936 | intron_variant                                                                                    |
| rs1420890847 | intron_variant,genic_downstream_transcript_variant                                                |
| rs1420917514 | intron_variant                                                                                    |
| rs1420930337 | intron_variant                                                                                    |
| rs1420935255 | intron_variant,genic_upstream_transcript_variant                                                  |
| rs1420950572 | intron_variant,genic_upstream_transcript_variant                                                  |
| rs1420950882 | intron_variant,genic_downstream_transcript_variant                                                |
| rs1420975433 | intron_variant,genic_upstream_transcript_variant                                                  |
| rs1420979872 | intron_variant,genic_downstream_transcript_variant                                                |
| rs1421027559 | intron_variant,genic_downstream_transcript_variant                                                |
| rs1421028269 | genic_downstream_transcript_variant,non_coding_transcript_variant,3_prime_UTR_variant             |
| rs1421043791 | intron_variant,genic_downstream_transcript_variant                                                |
| rs1421059305 | intron_variant,genic_downstream_transcript_variant                                                |
| rs1421102466 | intron_variant,genic_upstream_transcript_variant                                                  |
| rs1421136204 | intron_variant,genic_upstream_transcript_variant                                                  |
| rs1421189692 | intron_variant                                                                                    |
| rs1421224397 | intron_variant,genic_upstream_transcript_variant,upstream_transcript_variant                      |
| rs1421232917 | intron_variant,genic_downstream_transcript_variant                                                |
| rs1421237443 | 2KB_upstream_variant,intron_variant,genic_upstream_transcript_variant,upstream_transcript_variant |
| rs1421243179 | genic_downstream_transcript_variant,non_coding_transcript_variant,3_prime_UTR_variant             |
| rs1421259979 | intron_variant                                                                                    |
| rs1421290095 | intron_variant,genic_downstream_transcript_variant                                                |
| rs1421298994 | intron_variant,genic_upstream_transcript_variant                                                  |
| rs1421300666 | intron_variant                                                                                    |
| rs1421300978 | intron_variant,genic_upstream_transcript_variant                                                  |
| rs1421337303 | intron_variant,genic_upstream_transcript_variant                                                  |
| rs1421345469 | intron_variant,genic_downstream_transcript_variant                                                |
| rs1421453556 | intron_variant,genic_upstream_transcript_variant                                                  |
| rs1421455633 | intron_variant                                                                                    |
| rs1421461518 | intron_variant                                                                                    |
| rs1421468883 | 2KB_upstream_variant,intron_variant,genic_upstream_transcript_variant,upstream_transcript_variant |
| rs1421571216 | intron_variant,genic_upstream_transcript_variant,upstream_transcript_variant                      |
| rs1421571748 | intron_variant,genic_upstream_transcript_variant                                                  |
| rs1421597231 | intron_variant,genic_upstream_transcript_variant                                                  |
| rs1421598688 | intron_variant,genic_downstream_transcript_variant                                                |
| rs1421652355 | intron_variant,genic_upstream_transcript_variant                                                  |
| rs1421661336 | intron_variant,genic_downstream_transcript_variant                                                |
| rs1421718195 | intron_variant,genic_upstream_transcript_variant                                                  |
| rs1421766875 | intron_variant,genic_upstream_transcript_variant                                                  |
| rs1421774051 | intron_variant,genic_upstream_transcript_variant                                                  |
| rs1421811939 | intron_variant,genic_upstream_transcript_variant,upstream_transcript_variant                      |
| rs1421818782 | intron_variant                                                                                    |
| rs1421828891 | intron_variant,genic_upstream_transcript_variant                                                  |
| rs1421868121 | intron_variant,genic_upstream_transcript_variant,upstream_transcript_variant                      |
| rs1421880147 | intron_variant                                                                                    |
| rs1421897564 | intron_variant,genic_upstream_transcript_variant                                                  |
| rs1421921787 | genic_upstream_transcript_variant,intron_variant                                                  |
| rs1421928126 | genic_upstream_transcript_variant,intron_variant                                                  |
| rs1421939985 | genic_downstream_transcript_variant,intron_variant                                                |
| rs1421944473 | genic_upstream_transcript_variant,intron_variant                                                  |
| rs1421980959 | intron_variant                                                                                    |
| rs1421989477 | genic_upstream_transcript_variant,intron_variant                                                  |
| rs1422016142 | genic_upstream_transcript_variant,intron_variant                                                  |
| rs1422029911 | intron_variant                                                                                    |
| rs1422036465 | genic_downstream_transcript_variant,intron_variant                                                |
| rs1422037755 | intron_variant                                                                                    |
| rs1422046181 | genic_upstream_transcript_variant,intron_variant                                                  |
| rs1422047757 | intron_variant                                                                                    |
| rs1422062331 | genic_upstream_transcript_variant,intron_variant                                                  |
| rs1422102640 | genic_downstream_transcript_variant,intron_variant                                                |
| rs1422124075 | genic_upstream_transcript_variant,intron_variant                                                  |
| rs1422160320 | genic_upstream_transcript_variant,intron_variant                                                  |
| rs1422185735 | intron_variant                                                                                    |
| rs1422193544 | genic_upstream_transcript_variant,intron_variant                                                  |
| rs1422208527 | intron_variant                                                                                    |
| rs1422229702 | genic_upstream_transcript_variant,upstream_transcript_variant,2KB_upstream_variant,intron_variant |
| rs1422234081 | genic_upstream_transcript_variant,intron_variant                                                  |
| rs1422278455 | genic_upstream_transcript_variant,intron_variant                                                  |
| rs1422321062 | genic_upstream_transcript_variant,upstream_transcript_variant,2KB_upstream_variant,intron_variant |
| rs1422359365 | intron_variant                                                                                    |
| rs1422375699 | downstream_transcript_variant,genic_downstream_transcript_variant,intron_variant                  |
| rs1422392149 | genic_upstream_transcript_variant,intron_variant                                                  |

|              |                                                                                                              |
|--------------|--------------------------------------------------------------------------------------------------------------|
| rs1422414887 | genic_upstream_transcript_variant,intron_variant                                                             |
| rs1422463275 | genic_upstream_transcript_variant,intron_variant                                                             |
| rs1422469241 | intron_variant                                                                                               |
| rs1422486932 | genic_upstream_transcript_variant,intron_variant                                                             |
| rs1422540708 | intron_variant                                                                                               |
| rs1422586440 | genic_upstream_transcript_variant,upstream_transcript_variant,2KB_upstream_variant,intron_variant            |
| rs1422639311 | intron_variant                                                                                               |
| rs1422659577 | genic_upstream_transcript_variant,intron_variant                                                             |
| rs1422700090 | genic_upstream_transcript_variant,5_prime_UTR_variant,non_coding_transcript_variant,intron_variant           |
| rs1422718497 | genic_upstream_transcript_variant,intron_variant                                                             |
| rs1422722057 | intron_variant                                                                                               |
| rs1422749892 | intron_variant                                                                                               |
| rs1422752731 | genic_upstream_transcript_variant,intron_variant                                                             |
| rs1422791220 | genic_downstream_transcript_variant,intron_variant                                                           |
| rs1422820847 | downstream_transcript_variant,500B_downstream_variant                                                        |
| rs1422825655 | intron_variant                                                                                               |
| rs1422853030 | genic_upstream_transcript_variant,upstream_transcript_variant,2KB_upstream_variant,intron_variant            |
| rs1422865395 | genic_upstream_transcript_variant,intron_variant                                                             |
| rs1422885739 | intron_variant                                                                                               |
| rs1422918531 | intron_variant                                                                                               |
| rs1422933094 | intron_variant                                                                                               |
| rs1422966258 | coding_sequence_variant,synonymous_variant,genic_downstream_transcript_variant,non_coding_transcript_variant |
| rs1422973668 | genic_upstream_transcript_variant,upstream_transcript_variant,2KB_upstream_variant,intron_variant            |
| rs1423043295 | genic_upstream_transcript_variant,intron_variant                                                             |
| rs1423052070 | genic_upstream_transcript_variant,intron_variant                                                             |
| rs1423151923 | intron_variant                                                                                               |
| rs1423267991 | genic_downstream_transcript_variant,intron_variant                                                           |
| rs1423270706 | intron_variant                                                                                               |
| rs1423310746 | intron_variant                                                                                               |
| rs1423340324 | genic_downstream_transcript_variant,intron_variant                                                           |
| rs1423372708 | genic_upstream_transcript_variant,5_prime_UTR_variant,non_coding_transcript_variant,intron_variant           |
| rs1423379004 | genic_downstream_transcript_variant,intron_variant                                                           |
| rs1423396047 | genic_upstream_transcript_variant,intron_variant                                                             |
| rs1423406383 | genic_upstream_transcript_variant,intron_variant                                                             |
| rs1423408175 | intron_variant                                                                                               |
| rs1423425645 | intron_variant                                                                                               |
| rs1423429918 | genic_downstream_transcript_variant,intron_variant                                                           |
| rs1423465410 | genic_upstream_transcript_variant,intron_variant                                                             |
| rs1423536772 | intron_variant                                                                                               |
| rs1423553466 | intron_variant                                                                                               |
| rs1423577251 | intron_variant                                                                                               |
| rs1423610031 | intron_variant                                                                                               |
| rs1423631417 | intron_variant                                                                                               |
| rs1423679133 | genic_upstream_transcript_variant,upstream_transcript_variant,intron_variant                                 |
| rs1423684140 | genic_upstream_transcript_variant,upstream_transcript_variant,2KB_upstream_variant,intron_variant            |
| rs1423699789 | coding_sequence_variant,missense_variant,genic_downstream_transcript_variant,non_coding_transcript_variant   |
| rs1423723960 | intron_variant                                                                                               |
| rs1423764257 | intron_variant                                                                                               |
| rs1423803709 | genic_upstream_transcript_variant,intron_variant                                                             |
| rs1423856263 | intron_variant                                                                                               |
| rs1423881085 | genic_downstream_transcript_variant,non_coding_transcript_variant,3_prime_UTR_variant                        |
| rs1423908022 | genic_upstream_transcript_variant,intron_variant                                                             |
| rs1423924503 | intron_variant                                                                                               |
| rs1423935763 | genic_downstream_transcript_variant,intron_variant                                                           |
| rs1424015283 | genic_downstream_transcript_variant,intron_variant                                                           |
| rs1424041665 | genic_downstream_transcript_variant,intron_variant                                                           |
| rs1424055148 | intron_variant                                                                                               |
| rs1424109025 | intron_variant                                                                                               |
| rs1424136579 | genic_downstream_transcript_variant,intron_variant                                                           |
| rs1424157003 | genic_downstream_transcript_variant,intron_variant                                                           |
| rs1424162180 | intron_variant                                                                                               |
| rs1424232690 | genic_upstream_transcript_variant,intron_variant                                                             |
| rs1424279963 | genic_downstream_transcript_variant,intron_variant                                                           |
| rs1424317470 | genic_upstream_transcript_variant,upstream_transcript_variant,intron_variant                                 |
| rs1424351823 | genic_upstream_transcript_variant,intron_variant                                                             |
| rs1424370270 | intron_variant                                                                                               |
| rs1424395698 | genic_upstream_transcript_variant,intron_variant                                                             |
| rs1424400050 | genic_upstream_transcript_variant,intron_variant                                                             |
| rs1424402480 | genic_upstream_transcript_variant,intron_variant                                                             |
| rs1424420830 | coding_sequence_variant,synonymous_variant,non_coding_transcript_variant                                     |
| rs1424426229 | genic_upstream_transcript_variant,upstream_transcript_variant,intron_variant                                 |
| rs1424428516 | intron_variant                                                                                               |
| rs1424447851 | genic_downstream_transcript_variant,intron_variant                                                           |
| rs1424455189 | genic_downstream_transcript_variant,intron_variant                                                           |

|              |                                                                                                   |
|--------------|---------------------------------------------------------------------------------------------------|
| rs1424473948 | genic_downstream_transcript_variant,intron_variant                                                |
| rs1424508319 | genic_upstream_transcript_variant,intron_variant                                                  |
| rs1424516651 | intron_variant                                                                                    |
| rs1424517036 | genic_upstream_transcript_variant,intron_variant                                                  |
| rs1424563606 | intron_variant                                                                                    |
| rs1424567821 | coding_sequence_variant,synonymous_variant,non_coding_transcript_variant                          |
| rs1424569066 | intron_variant                                                                                    |
| rs1424601648 | genic_upstream_transcript_variant,intron_variant                                                  |
| rs1424615590 | intron_variant                                                                                    |
| rs1424627981 | intron_variant                                                                                    |
| rs1424632016 | intron_variant                                                                                    |
| rs1424660115 | intron_variant                                                                                    |
| rs1424681622 | genic_downstream_transcript_variant,intron_variant                                                |
| rs1424713187 | intron_variant                                                                                    |
| rs1424731779 | genic_upstream_transcript_variant,intron_variant                                                  |
| rs1424745032 | genic_downstream_transcript_variant,non_coding_transcript_variant,3_prime_UTR_variant             |
| rs1424746837 | intron_variant                                                                                    |
| rs1424850440 | genic_downstream_transcript_variant,intron_variant                                                |
| rs1424851494 | intron_variant                                                                                    |
| rs1424874459 | intron_variant                                                                                    |
| rs1424911152 | genic_upstream_transcript_variant,intron_variant                                                  |
| rs1424919208 | genic_downstream_transcript_variant,intron_variant                                                |
| rs1424939179 | downstream_transcript_variant,500B_downstream_variant                                             |
| rs1424953403 | genic_upstream_transcript_variant,intron_variant                                                  |
| rs1424956700 | intron_variant                                                                                    |
| rs1424956927 | genic_downstream_transcript_variant,intron_variant                                                |
| rs1424967818 | genic_downstream_transcript_variant,non_coding_transcript_variant,3_prime_UTR_variant             |
| rs1424996653 | genic_upstream_transcript_variant,intron_variant                                                  |
| rs1424997203 | intron_variant                                                                                    |
| rs1425054192 | genic_upstream_transcript_variant,intron_variant                                                  |
| rs1425071186 | 5_prime_UTR_variant,intron_variant                                                                |
| rs1425078815 | genic_upstream_transcript_variant,intron_variant                                                  |
| rs1425078851 | intron_variant                                                                                    |
| rs1425084051 | coding_sequence_variant,synonymous_variant,non_coding_transcript_variant                          |
| rs1425098169 | intron_variant                                                                                    |
| rs1425157972 | genic_upstream_transcript_variant,intron_variant                                                  |
| rs1425161140 | genic_downstream_transcript_variant,intron_variant                                                |
| rs1425173302 | intron_variant                                                                                    |
| rs1425177681 | genic_upstream_transcript_variant,intron_variant                                                  |
| rs1425183711 | genic_downstream_transcript_variant,non_coding_transcript_variant,3_prime_UTR_variant             |
| rs1425213675 | intron_variant                                                                                    |
| rs1425232145 | genic_downstream_transcript_variant,intron_variant                                                |
| rs1425256990 | genic_upstream_transcript_variant,intron_variant                                                  |
| rs1425296429 | genic_downstream_transcript_variant,non_coding_transcript_variant,3_prime_UTR_variant             |
| rs1425344967 | genic_upstream_transcript_variant,intron_variant                                                  |
| rs1425347698 | intron_variant                                                                                    |
| rs1425360911 | intron_variant                                                                                    |
| rs1425371623 | genic_upstream_transcript_variant,intron_variant                                                  |
| rs1425389056 | genic_downstream_transcript_variant,splice_donor_variant                                          |
| rs1425417534 | genic_upstream_transcript_variant,upstream_transcript_variant,2KB_upstream_variant,intron_variant |
| rs1425433171 | genic_upstream_transcript_variant,intron_variant                                                  |
| rs1425468795 | intron_variant                                                                                    |
| rs1425473151 | genic_downstream_transcript_variant,intron_variant                                                |
| rs1425485583 | intron_variant                                                                                    |
| rs1425512798 | genic_downstream_transcript_variant,intron_variant                                                |
| rs1425514359 | intron_variant                                                                                    |
| rs1425514760 | genic_upstream_transcript_variant,intron_variant                                                  |
| rs1425540494 | intron_variant                                                                                    |
| rs1425587628 | intron_variant                                                                                    |
| rs1425611692 | genic_upstream_transcript_variant,intron_variant                                                  |
| rs1425619832 | intron_variant                                                                                    |
| rs1425631297 | genic_upstream_transcript_variant,intron_variant                                                  |
| rs1425636516 | intron_variant                                                                                    |
| rs1425669712 | genic_upstream_transcript_variant,intron_variant                                                  |
| rs1425691673 | genic_upstream_transcript_variant,intron_variant                                                  |
| rs1425695998 | genic_upstream_transcript_variant,intron_variant                                                  |
| rs1425701220 | genic_downstream_transcript_variant,intron_variant                                                |
| rs1425719355 | genic_upstream_transcript_variant,intron_variant                                                  |
| rs1425738644 | genic_upstream_transcript_variant,intron_variant                                                  |
| rs1425894686 | intron_variant                                                                                    |
| rs1425902060 | genic_upstream_transcript_variant,intron_variant                                                  |
| rs1425921810 | genic_upstream_transcript_variant,intron_variant                                                  |
| rs1425939385 | genic_upstream_transcript_variant,intron_variant                                                  |
| rs1425950145 | genic_upstream_transcript_variant,intron_variant                                                  |

|              |                                                                                                    |
|--------------|----------------------------------------------------------------------------------------------------|
| rs1425956326 | genic_upstream_transcript_variant,intron_variant                                                   |
| rs1426017203 | genic_upstream_transcript_variant,upstream_transcript_variant,2KB_upstream_variant,intron_variant  |
| rs1426039432 | intron_variant                                                                                     |
| rs1426051548 | genic_downstream_transcript_variant,intron_variant                                                 |
| rs1426096893 | intron_variant                                                                                     |
| rs1426102387 | intron_variant                                                                                     |
| rs1426132123 | genic_upstream_transcript_variant,intron_variant                                                   |
| rs1426134519 | genic_upstream_transcript_variant,upstream_transcript_variant,2KB_upstream_variant,intron_variant  |
| rs1426135286 | genic_upstream_transcript_variant,intron_variant                                                   |
| rs1426164750 | intron_variant                                                                                     |
| rs1426177924 | intron_variant                                                                                     |
| rs1426224427 | genic_downstream_transcript_variant,intron_variant                                                 |
| rs1426253787 | intron_variant                                                                                     |
| rs1426299544 | intron_variant                                                                                     |
| rs1426323596 | genic_downstream_transcript_variant,intron_variant                                                 |
| rs1426327621 | genic_upstream_transcript_variant,intron_variant                                                   |
| rs1426334478 | genic_downstream_transcript_variant,intron_variant                                                 |
| rs1426363944 | intron_variant                                                                                     |
| rs1426422026 | intron_variant                                                                                     |
| rs1426435984 | intron_variant                                                                                     |
| rs1426445660 | genic_downstream_transcript_variant,intron_variant                                                 |
| rs1426452513 | genic_upstream_transcript_variant,5_prime_UTR_variant,non_coding_transcript_variant,intron_variant |
| rs1426453605 | genic_downstream_transcript_variant,intron_variant                                                 |
| rs1426454117 | intron_variant                                                                                     |
| rs1426575875 | genic_upstream_transcript_variant,intron_variant                                                   |
| rs1426603349 | genic_upstream_transcript_variant,intron_variant                                                   |
| rs1426640689 | genic_upstream_transcript_variant,intron_variant                                                   |
| rs1426680947 | genic_downstream_transcript_variant,intron_variant                                                 |
| rs1426681604 | intron_variant                                                                                     |
| rs1426683856 | genic_downstream_transcript_variant,intron_variant                                                 |
| rs1426713575 | genic_upstream_transcript_variant,intron_variant                                                   |
| rs1426729399 | genic_upstream_transcript_variant,intron_variant                                                   |
| rs1426807525 | intron_variant                                                                                     |
| rs1426808306 | genic_downstream_transcript_variant,non_coding_transcript_variant,3_prime_UTR_variant              |
| rs1426863619 | genic_upstream_transcript_variant,intron_variant                                                   |
| rs1426870666 | genic_upstream_transcript_variant,upstream_transcript_variant,2KB_upstream_variant,intron_variant  |
| rs1426917904 | intron_variant                                                                                     |
| rs1426940620 | genic_upstream_transcript_variant,intron_variant                                                   |
| rs1426951783 | intron_variant                                                                                     |
| rs1426960183 | genic_upstream_transcript_variant,intron_variant                                                   |
| rs1426989076 | genic_upstream_transcript_variant,intron_variant                                                   |
| rs1426996276 | intron_variant                                                                                     |
| rs1427003410 | intron_variant                                                                                     |
| rs1427015348 | genic_upstream_transcript_variant,intron_variant                                                   |
| rs1427017943 | intron_variant                                                                                     |
| rs1427023783 | genic_upstream_transcript_variant,intron_variant                                                   |
| rs1427039058 | genic_upstream_transcript_variant,intron_variant                                                   |
| rs1427051207 | coding_sequence_variant,missense_variant,non_coding_transcript_variant                             |
| rs1427060717 | genic_downstream_transcript_variant,intron_variant                                                 |
| rs1427064585 | intron_variant                                                                                     |
| rs1427094129 | intron_variant                                                                                     |
| rs1427148191 | genic_downstream_transcript_variant,intron_variant                                                 |
| rs1427153432 | genic_upstream_transcript_variant,intron_variant                                                   |
| rs1427165500 | intron_variant                                                                                     |
| rs1427183385 | genic_upstream_transcript_variant,intron_variant                                                   |
| rs1427218909 | intron_variant                                                                                     |
| rs1427223521 | genic_upstream_transcript_variant,intron_variant                                                   |
| rs1427239676 | coding_sequence_variant,missense_variant,non_coding_transcript_variant                             |
| rs1427267429 | genic_upstream_transcript_variant,upstream_transcript_variant,intron_variant                       |
| rs1427287929 | genic_upstream_transcript_variant,intron_variant                                                   |
| rs1427309623 | genic_downstream_transcript_variant,intron_variant                                                 |
| rs1427373132 | genic_upstream_transcript_variant,intron_variant                                                   |
| rs1427395776 | genic_upstream_transcript_variant,intron_variant                                                   |
| rs1427404223 | genic_upstream_transcript_variant,intron_variant                                                   |
| rs1427489606 | genic_upstream_transcript_variant,intron_variant                                                   |
| rs1427564702 | intron_variant                                                                                     |
| rs1427687115 | intron_variant                                                                                     |
| rs1427715778 | genic_upstream_transcript_variant,intron_variant                                                   |
| rs1427717143 | intron_variant                                                                                     |
| rs1427749123 | genic_upstream_transcript_variant,intron_variant                                                   |
| rs1427793414 | intron_variant                                                                                     |
| rs1427834943 | genic_upstream_transcript_variant,intron_variant                                                   |
| rs1427848823 | genic_upstream_transcript_variant,intron_variant                                                   |
| rs1427883520 | intron_variant                                                                                     |

|              |                                                                                                   |
|--------------|---------------------------------------------------------------------------------------------------|
| rs1427891995 | genic_upstream_transcript_variant,intron_variant                                                  |
| rs1427912768 | genic_downstream_transcript_variant,intron_variant                                                |
| rs1427951492 | genic_upstream_transcript_variant,intron_variant                                                  |
| rs1427990010 | genic_upstream_transcript_variant,intron_variant                                                  |
| rs1427992367 | genic_upstream_transcript_variant,intron_variant                                                  |
| rs1427996719 | intron_variant                                                                                    |
| rs1428042601 | genic_upstream_transcript_variant,intron_variant                                                  |
| rs1428051614 | genic_upstream_transcript_variant,intron_variant                                                  |
| rs1428062120 | genic_downstream_transcript_variant,intron_variant                                                |
| rs1428065826 | intron_variant                                                                                    |
| rs1428089393 | genic_downstream_transcript_variant,intron_variant                                                |
| rs1428090710 | genic_upstream_transcript_variant,intron_variant                                                  |
| rs1428091730 | genic_upstream_transcript_variant,intron_variant                                                  |
| rs1428094597 | intron_variant                                                                                    |
| rs1428175627 | intron_variant                                                                                    |
| rs1428199094 | intron_variant                                                                                    |
| rs1428199845 | genic_upstream_transcript_variant,intron_variant                                                  |
| rs1428211011 | genic_upstream_transcript_variant,intron_variant                                                  |
| rs1428258959 | genic_upstream_transcript_variant,intron_variant                                                  |
| rs1428279685 | genic_upstream_transcript_variant,intron_variant                                                  |
| rs1428289208 | genic_upstream_transcript_variant,intron_variant                                                  |
| rs1428414746 | genic_upstream_transcript_variant,intron_variant                                                  |
| rs1428428166 | intron_variant                                                                                    |
| rs1428428504 | genic_upstream_transcript_variant,intron_variant                                                  |
| rs1428439255 | intron_variant                                                                                    |
| rs1428457234 | genic_upstream_transcript_variant,intron_variant                                                  |
| rs1428490730 | intron_variant                                                                                    |
| rs1428523797 | intron_variant                                                                                    |
| rs1428537533 | genic_upstream_transcript_variant,intron_variant                                                  |
| rs1428629301 | genic_downstream_transcript_variant,intron_variant                                                |
| rs1428633135 | genic_upstream_transcript_variant,intron_variant                                                  |
| rs1428654191 | intron_variant                                                                                    |
| rs1428681889 | genic_upstream_transcript_variant,intron_variant                                                  |
| rs1428717336 | genic_downstream_transcript_variant,intron_variant                                                |
| rs1428744596 | genic_upstream_transcript_variant,intron_variant                                                  |
| rs1428777432 | intron_variant                                                                                    |
| rs1428785637 | genic_upstream_transcript_variant,intron_variant                                                  |
| rs1428791579 | genic_upstream_transcript_variant,upstream_transcript_variant,2KB_upstream_variant,intron_variant |
| rs1428792722 | genic_downstream_transcript_variant,intron_variant                                                |
| rs1428866401 | genic_upstream_transcript_variant,intron_variant                                                  |
| rs1428873877 | genic_upstream_transcript_variant,intron_variant                                                  |
| rs1428878376 | intron_variant                                                                                    |
| rs1428884788 | genic_downstream_transcript_variant,intron_variant                                                |
| rs1428885379 | genic_downstream_transcript_variant,intron_variant                                                |
| rs1428916155 | intron_variant                                                                                    |
| rs1428918859 | genic_upstream_transcript_variant,intron_variant                                                  |
| rs1428926640 | genic_downstream_transcript_variant,non_coding_transcript_variant,3_prime_UTR_variant             |
| rs1428965297 | genic_upstream_transcript_variant,intron_variant                                                  |
| rs1428996841 | intron_variant                                                                                    |
| rs1428998113 | genic_upstream_transcript_variant,intron_variant                                                  |
| rs1428999050 | genic_downstream_transcript_variant,intron_variant                                                |
| rs1429090220 | genic_downstream_transcript_variant,intron_variant                                                |
| rs1429098348 | intron_variant                                                                                    |
| rs1429100216 | intron_variant                                                                                    |
| rs1429147596 | downstream_transcript_variant,genic_downstream_transcript_variant,intron_variant                  |
| rs1429154398 | genic_upstream_transcript_variant,intron_variant                                                  |
| rs1429219082 | intron_variant                                                                                    |
| rs1429240484 | genic_downstream_transcript_variant,intron_variant                                                |
| rs1429304283 | genic_upstream_transcript_variant,intron_variant                                                  |
| rs1429312825 | intron_variant                                                                                    |
| rs1429327764 | genic_upstream_transcript_variant,intron_variant                                                  |
| rs1429360492 | intron_variant                                                                                    |
| rs1429361957 | intron_variant                                                                                    |
| rs1429395225 | genic_downstream_transcript_variant,intron_variant                                                |
| rs1429407600 | genic_upstream_transcript_variant,intron_variant                                                  |
| rs1429414605 | 5_prime_UTR_variant,intron_variant                                                                |
| rs1429445746 | intron_variant                                                                                    |
| rs1429484639 | genic_downstream_transcript_variant,intron_variant                                                |
| rs1429527617 | intron_variant                                                                                    |
| rs1429581340 | intron_variant                                                                                    |
| rs1429593043 | intron_variant                                                                                    |
| rs1429613195 | genic_downstream_transcript_variant,intron_variant                                                |
| rs1429682005 | genic_upstream_transcript_variant,intron_variant                                                  |
| rs1429686802 | genic_upstream_transcript_variant,intron_variant                                                  |

|              |                                                                                                                           |
|--------------|---------------------------------------------------------------------------------------------------------------------------|
| rs1429690128 | genic_upstream_transcript_variant,intron_variant                                                                          |
| rs1429694270 | genic_upstream_transcript_variant,intron_variant                                                                          |
| rs1429701261 | genic_upstream_transcript_variant,intron_variant                                                                          |
| rs1429712436 | intron_variant                                                                                                            |
| rs1429728612 | genic_upstream_transcript_variant,intron_variant                                                                          |
| rs1429735929 | genic_upstream_transcript_variant,intron_variant                                                                          |
| rs1429743118 | intron_variant                                                                                                            |
| rs1429750625 | genic_upstream_transcript_variant,intron_variant                                                                          |
| rs1429754742 | intron_variant                                                                                                            |
| rs1429777376 | intron_variant                                                                                                            |
| rs1429777881 | genic_downstream_transcript_variant,intron_variant                                                                        |
| rs1429801044 | intron_variant                                                                                                            |
| rs1429840711 | intron_variant                                                                                                            |
| rs1429876848 | intron_variant                                                                                                            |
| rs1429915038 | genic_downstream_transcript_variant,intron_variant                                                                        |
| rs1429952049 | intron_variant                                                                                                            |
| rs1429974687 | intron_variant                                                                                                            |
| rs1430004750 | genic_downstream_transcript_variant,intron_variant                                                                        |
| rs1430034857 | intron_variant                                                                                                            |
| rs1430047058 | genic_upstream_transcript_variant,intron_variant                                                                          |
| rs1430076534 | genic_upstream_transcript_variant,intron_variant                                                                          |
| rs1430116275 | 5_prime_UTR_variant,intron_variant                                                                                        |
| rs1430124406 | genic_downstream_transcript_variant,intron_variant                                                                        |
| rs1430170795 | genic_upstream_transcript_variant,intron_variant                                                                          |
| rs1430187255 | intron_variant                                                                                                            |
| rs1430219666 | intron_variant                                                                                                            |
| rs1430227714 | intron_variant                                                                                                            |
| rs1430246761 | genic_upstream_transcript_variant,intron_variant                                                                          |
| rs1430264533 | genic_downstream_transcript_variant,intron_variant                                                                        |
| rs1430284792 | intron_variant                                                                                                            |
| rs1430294176 | genic_downstream_transcript_variant,intron_variant                                                                        |
| rs1430371443 | genic_upstream_transcript_variant,intron_variant                                                                          |
| rs1430379388 | intron_variant                                                                                                            |
| rs1430424200 | genic_upstream_transcript_variant,intron_variant                                                                          |
| rs1430477113 | intron_variant                                                                                                            |
| rs1430481480 | genic_downstream_transcript_variant,non_coding_transcript_variant,3_prime_UTR_variant                                     |
| rs1430483205 | intron_variant                                                                                                            |
| rs1430496165 | genic_upstream_transcript_variant,upstream_transcript_variant,intron_variant                                              |
| rs1430500690 | intron_variant                                                                                                            |
| rs1430505386 | genic_downstream_transcript_variant,intron_variant                                                                        |
| rs1430525432 | genic_downstream_transcript_variant,intron_variant                                                                        |
| rs1430582650 | genic_downstream_transcript_variant,intron_variant                                                                        |
| rs1430640070 | genic_downstream_transcript_variant,intron_variant                                                                        |
| rs1430661132 | intron_variant                                                                                                            |
| rs1430698695 | genic_downstream_transcript_variant,non_coding_transcript_variant,3_prime_UTR_variant                                     |
| rs1430720632 | genic_downstream_transcript_variant,intron_variant                                                                        |
| rs1430726033 | genic_upstream_transcript_variant,non_coding_transcript_variant,coding_sequence_variant,synonymous_variant,intron_variant |
| rs1430782500 | genic_upstream_transcript_variant,upstream_transcript_variant,2KB_upstream_variant,intron_variant                         |
| rs1430816522 | intron_variant                                                                                                            |
| rs1430828427 | intron_variant                                                                                                            |
| rs1430833139 | intron_variant                                                                                                            |
| rs1430867292 | genic_downstream_transcript_variant,intron_variant                                                                        |
| rs1430882194 | genic_downstream_transcript_variant,intron_variant                                                                        |
| rs1430891140 | intron_variant                                                                                                            |
| rs1430924636 | genic_downstream_transcript_variant,intron_variant                                                                        |
| rs1430944198 | intron_variant                                                                                                            |
| rs1430970282 | genic_upstream_transcript_variant,intron_variant                                                                          |
| rs1430978343 | genic_downstream_transcript_variant,intron_variant                                                                        |
| rs1430982560 | genic_downstream_transcript_variant,intron_variant                                                                        |
| rs1431019652 | genic_downstream_transcript_variant,intron_variant                                                                        |
| rs1431068760 | genic_upstream_transcript_variant,intron_variant                                                                          |
| rs1431107005 | genic_upstream_transcript_variant,intron_variant                                                                          |
| rs1431136569 | genic_downstream_transcript_variant,intron_variant                                                                        |
| rs1431172313 | genic_upstream_transcript_variant,intron_variant                                                                          |
| rs1431181347 | genic_upstream_transcript_variant,upstream_transcript_variant,2KB_upstream_variant,intron_variant                         |
| rs1431226697 | genic_upstream_transcript_variant,intron_variant                                                                          |
| rs1431252742 | genic_upstream_transcript_variant,intron_variant                                                                          |
| rs1431271646 | genic_downstream_transcript_variant,intron_variant                                                                        |
| rs1431333870 | genic_upstream_transcript_variant,intron_variant                                                                          |
| rs1431343572 | intron_variant                                                                                                            |
| rs1431415059 | genic_downstream_transcript_variant,intron_variant                                                                        |
| rs1431448460 | genic_upstream_transcript_variant,intron_variant                                                                          |
| rs1431482280 | coding_sequence_variant,missense_variant,non_coding_transcript_variant                                                    |
| rs1431487293 | genic_upstream_transcript_variant,intron_variant                                                                          |

|              |                                                                                                                           |
|--------------|---------------------------------------------------------------------------------------------------------------------------|
| rs1431488064 | genic_downstream_transcript_variant,intron_variant                                                                        |
| rs1431616521 | intron_variant                                                                                                            |
| rs1431683899 | coding_sequence_variant,missense_variant,genic_downstream_transcript_variant,non_coding_transcript_variant                |
| rs1431684129 | intron_variant                                                                                                            |
| rs1431701159 | genic_upstream_transcript_variant,intron_variant                                                                          |
| rs1431732603 | genic_upstream_transcript_variant,upstream_transcript_variant,intron_variant                                              |
| rs1431751725 | intron_variant                                                                                                            |
| rs1431764584 | intron_variant                                                                                                            |
| rs1431785150 | genic_upstream_transcript_variant,intron_variant                                                                          |
| rs1431833042 | genic_upstream_transcript_variant,intron_variant                                                                          |
| rs1431918006 | genic_downstream_transcript_variant,intron_variant                                                                        |
| rs1431986735 | genic_upstream_transcript_variant,intron_variant                                                                          |
| rs1432045313 | intron_variant                                                                                                            |
| rs1432057531 | genic_downstream_transcript_variant,non_coding_transcript_variant,3_prime_UTR_variant                                     |
| rs1432099602 | genic_upstream_transcript_variant,intron_variant                                                                          |
| rs1432139158 | genic_downstream_transcript_variant,intron_variant                                                                        |
| rs1432224890 | genic_downstream_transcript_variant,intron_variant                                                                        |
| rs1432258525 | intron_variant                                                                                                            |
| rs1432276025 | genic_downstream_transcript_variant,intron_variant                                                                        |
| rs1432314969 | genic_upstream_transcript_variant,intron_variant                                                                          |
| rs1432382362 | genic_downstream_transcript_variant,intron_variant                                                                        |
| rs1432419896 | intron_variant                                                                                                            |
| rs1432469613 | genic_upstream_transcript_variant,intron_variant                                                                          |
| rs1432477966 | intron_variant                                                                                                            |
| rs1432479365 | genic_upstream_transcript_variant,intron_variant                                                                          |
| rs1432581826 | genic_downstream_transcript_variant,intron_variant                                                                        |
| rs1432597172 | genic_downstream_transcript_variant,intron_variant                                                                        |
| rs1432720848 | intron_variant                                                                                                            |
| rs1432750820 | intron_variant                                                                                                            |
| rs1432759228 | intron_variant                                                                                                            |
| rs1432782215 | intron_variant                                                                                                            |
| rs1432789061 | intron_variant                                                                                                            |
| rs1432798894 | genic_upstream_transcript_variant,intron_variant                                                                          |
| rs1432802260 | genic_upstream_transcript_variant,intron_variant                                                                          |
| rs1432834620 | genic_downstream_transcript_variant,intron_variant                                                                        |
| rs1432841316 | genic_upstream_transcript_variant,intron_variant                                                                          |
| rs1432854351 | genic_upstream_transcript_variant,intron_variant                                                                          |
| rs1432863997 | genic_upstream_transcript_variant,intron_variant                                                                          |
| rs1432931968 | intron_variant                                                                                                            |
| rs1432943392 | intron_variant                                                                                                            |
| rs1432947073 | genic_upstream_transcript_variant,intron_variant                                                                          |
| rs1432971085 | intron_variant                                                                                                            |
| rs1432977273 | genic_upstream_transcript_variant,non_coding_transcript_variant,coding_sequence_variant,synonymous_variant,intron_variant |
| rs1432983845 | genic_downstream_transcript_variant,non_coding_transcript_variant,3_prime_UTR_variant                                     |
| rs1433019092 | genic_upstream_transcript_variant,intron_variant                                                                          |
| rs1433029332 | intron_variant                                                                                                            |
| rs1433097066 | genic_downstream_transcript_variant,non_coding_transcript_variant,3_prime_UTR_variant                                     |
| rs1433112753 | genic_upstream_transcript_variant,intron_variant                                                                          |
| rs1433173146 | genic_upstream_transcript_variant,intron_variant                                                                          |
| rs1433239747 | genic_upstream_transcript_variant,intron_variant                                                                          |
| rs1433249274 | genic_upstream_transcript_variant,intron_variant                                                                          |
| rs1433255882 | genic_upstream_transcript_variant,intron_variant                                                                          |
| rs1433275705 | genic_upstream_transcript_variant,intron_variant                                                                          |
| rs1433311001 | genic_upstream_transcript_variant,intron_variant                                                                          |
| rs1433324747 | genic_upstream_transcript_variant,intron_variant                                                                          |
| rs1433379712 | intron_variant                                                                                                            |
| rs1433409607 | genic_downstream_transcript_variant,intron_variant                                                                        |
| rs1433417502 | genic_upstream_transcript_variant,upstream_transcript_variant,2KB_upstream_variant,intron_variant                         |
| rs1433429704 | intron_variant                                                                                                            |
| rs1433460756 | intron_variant                                                                                                            |
| rs1433483763 | coding_sequence_variant,synonymous_variant,non_coding_transcript_variant                                                  |
| rs1433545256 | genic_upstream_transcript_variant,upstream_transcript_variant,2KB_upstream_variant,intron_variant                         |
| rs1433555166 | genic_upstream_transcript_variant,intron_variant                                                                          |
| rs1433575702 | genic_upstream_transcript_variant,upstream_transcript_variant,intron_variant                                              |
| rs1433581161 | intron_variant                                                                                                            |
| rs1433586437 | genic_downstream_transcript_variant,intron_variant                                                                        |
| rs1433613909 | genic_upstream_transcript_variant,intron_variant                                                                          |
| rs1433658806 | intron_variant                                                                                                            |
| rs1433662300 | intron_variant                                                                                                            |
| rs1433702089 | genic_upstream_transcript_variant,non_coding_transcript_variant,coding_sequence_variant,synonymous_variant,intron_variant |
| rs1433727901 | intron_variant                                                                                                            |
| rs1433746577 | 5_prime_UTR_variant,intron_variant                                                                                        |
| rs1433787524 | intron_variant                                                                                                            |
| rs1433796696 | genic_downstream_transcript_variant,intron_variant                                                                        |

|              |                                                                                                            |
|--------------|------------------------------------------------------------------------------------------------------------|
| rs1433913527 | genic_downstream_transcript_variant,intron_variant                                                         |
| rs1433921987 | intron_variant                                                                                             |
| rs1433979717 | intron_variant                                                                                             |
| rs1433989329 | genic_downstream_transcript_variant,intron_variant                                                         |
| rs1434020791 | genic_upstream_transcript_variant,upstream_transcript_variant,intron_variant                               |
| rs1434058198 | intron_variant                                                                                             |
| rs1434074032 | genic_downstream_transcript_variant,intron_variant                                                         |
| rs1434074310 | intron_variant                                                                                             |
| rs1434134253 | intron_variant                                                                                             |
| rs1434138487 | genic_upstream_transcript_variant,intron_variant                                                           |
| rs1434193803 | intron_variant                                                                                             |
| rs1434197998 | intron_variant                                                                                             |
| rs1434237673 | genic_downstream_transcript_variant,intron_variant                                                         |
| rs1434248114 | coding_sequence_variant,missense_variant,genic_downstream_transcript_variant,non_coding_transcript_variant |
| rs1434262092 | genic_downstream_transcript_variant,intron_variant                                                         |
| rs1434279870 | intron_variant                                                                                             |
| rs1434283880 | genic_downstream_transcript_variant,intron_variant                                                         |
| rs1434320249 | intron_variant                                                                                             |
| rs1434345427 | intron_variant                                                                                             |
| rs1434433577 | genic_upstream_transcript_variant,upstream_transcript_variant,intron_variant                               |
| rs1434438828 | genic_downstream_transcript_variant,intron_variant                                                         |
| rs1434486821 | genic_upstream_transcript_variant,upstream_transcript_variant,intron_variant                               |
| rs1434580290 | intron_variant,genic_downstream_transcript_variant                                                         |
| rs1434588278 | intron_variant,genic_upstream_transcript_variant                                                           |
| rs1434602666 | intron_variant                                                                                             |
| rs1434605030 | intron_variant,genic_upstream_transcript_variant                                                           |
| rs1434614334 | intron_variant                                                                                             |
| rs1434660458 | intron_variant,genic_downstream_transcript_variant                                                         |
| rs1434680090 | intron_variant                                                                                             |
| rs1434698879 | intron_variant                                                                                             |
| rs1434744538 | intron_variant                                                                                             |
| rs1434805683 | intron_variant,genic_upstream_transcript_variant,2KB_upstream_variant,upstream_transcript_variant          |
| rs1434851727 | intron_variant,genic_downstream_transcript_variant                                                         |
| rs1434861014 | intron_variant                                                                                             |
| rs1434896991 | intron_variant                                                                                             |
| rs1434930087 | intron_variant,genic_upstream_transcript_variant                                                           |
| rs1434970057 | intron_variant                                                                                             |
| rs1434974815 | intron_variant,genic_downstream_transcript_variant                                                         |
| rs1434979740 | intron_variant                                                                                             |
| rs1435075239 | intron_variant                                                                                             |
| rs1435104476 | intron_variant,genic_upstream_transcript_variant                                                           |
| rs1435107106 | intron_variant                                                                                             |
| rs1435124766 | intron_variant                                                                                             |
| rs1435134493 | intron_variant                                                                                             |
| rs1435146982 | intron_variant,genic_upstream_transcript_variant                                                           |
| rs1435162492 | intron_variant                                                                                             |
| rs1435187597 | intron_variant,genic_upstream_transcript_variant                                                           |
| rs1435210043 | intron_variant                                                                                             |
| rs1435274497 | intron_variant,genic_upstream_transcript_variant                                                           |
| rs1435293339 | intron_variant,genic_upstream_transcript_variant                                                           |
| rs1435338452 | intron_variant,genic_upstream_transcript_variant                                                           |
| rs1435360462 | intron_variant                                                                                             |
| rs1435397103 | intron_variant,genic_upstream_transcript_variant,upstream_transcript_variant                               |
| rs1435406118 | intron_variant                                                                                             |
| rs1435432761 | intron_variant,genic_upstream_transcript_variant                                                           |
| rs1435486183 | intron_variant,genic_upstream_transcript_variant,upstream_transcript_variant                               |
| rs1435510422 | intron_variant,genic_upstream_transcript_variant                                                           |
| rs1435539302 | intron_variant,genic_upstream_transcript_variant                                                           |
| rs1435541899 | intron_variant,genic_upstream_transcript_variant                                                           |
| rs1435570388 | intron_variant                                                                                             |
| rs1435600269 | intron_variant,genic_upstream_transcript_variant                                                           |
| rs1435624973 | intron_variant,genic_upstream_transcript_variant                                                           |
| rs1435631237 | intron_variant,genic_upstream_transcript_variant                                                           |
| rs1435631699 | intron_variant,genic_upstream_transcript_variant                                                           |
| rs1435697337 | intron_variant                                                                                             |
| rs1435714248 | intron_variant,genic_upstream_transcript_variant                                                           |
| rs1435735529 | intron_variant                                                                                             |
| rs1435764115 | intron_variant,genic_upstream_transcript_variant                                                           |
| rs1435798557 | intron_variant,genic_upstream_transcript_variant                                                           |
| rs1435843312 | intron_variant,genic_upstream_transcript_variant                                                           |
| rs1435868740 | intron_variant,genic_downstream_transcript_variant                                                         |
| rs1435875772 | intron_variant,genic_upstream_transcript_variant                                                           |
| rs1435883486 | intron_variant,genic_upstream_transcript_variant                                                           |
| rs1435921405 | intron_variant,genic_upstream_transcript_variant                                                           |

|              |                                                                                                   |
|--------------|---------------------------------------------------------------------------------------------------|
| rs1435967874 | intron_variant,genic_upstream_transcript_variant                                                  |
| rs1436010421 | intron_variant                                                                                    |
| rs1436051571 | intron_variant,genic_upstream_transcript_variant,2KB_upstream_variant,upstream_transcript_variant |
| rs1436117328 | intron_variant,genic_downstream_transcript_variant                                                |
| rs1436134181 | intron_variant                                                                                    |
| rs1436181089 | intron_variant,genic_upstream_transcript_variant                                                  |
| rs1436187525 | intron_variant,genic_upstream_transcript_variant                                                  |
| rs1436230982 | intron_variant                                                                                    |
| rs1436249154 | intron_variant                                                                                    |
| rs1436336741 | intron_variant,genic_upstream_transcript_variant                                                  |
| rs1436403535 | intron_variant,genic_upstream_transcript_variant                                                  |
| rs1436456332 | intron_variant,genic_upstream_transcript_variant                                                  |
| rs1436460176 | intron_variant,genic_downstream_transcript_variant                                                |
| rs1436506169 | intron_variant                                                                                    |
| rs1436508117 | intron_variant                                                                                    |
| rs1436513176 | intron_variant,genic_upstream_transcript_variant                                                  |
| rs1436519586 | intron_variant,genic_upstream_transcript_variant                                                  |
| rs1436523254 | intron_variant,genic_upstream_transcript_variant                                                  |
| rs1436542970 | intron_variant,genic_downstream_transcript_variant                                                |
| rs1436551337 | intron_variant,genic_downstream_transcript_variant                                                |
| rs1436551644 | intron_variant,genic_upstream_transcript_variant                                                  |
| rs1436605019 | intron_variant                                                                                    |
| rs1436639704 | intron_variant,genic_upstream_transcript_variant                                                  |
| rs1436659830 | intron_variant                                                                                    |
| rs1436663348 | intron_variant                                                                                    |
| rs1436677870 | intron_variant                                                                                    |
| rs1436693947 | intron_variant,genic_upstream_transcript_variant                                                  |
| rs1436709607 | intron_variant,genic_upstream_transcript_variant                                                  |
| rs1436747215 | intron_variant,genic_downstream_transcript_variant                                                |
| rs1436759130 | intron_variant,genic_upstream_transcript_variant                                                  |
| rs1436772987 | intron_variant                                                                                    |
| rs1436809741 | intron_variant,genic_downstream_transcript_variant                                                |
| rs1436841470 | intron_variant,genic_upstream_transcript_variant,upstream_transcript_variant                      |
| rs1436860773 | intron_variant,genic_downstream_transcript_variant                                                |
| rs1436861547 | intron_variant                                                                                    |
| rs1436866079 | intron_variant,genic_downstream_transcript_variant                                                |
| rs1436926892 | 5_prime_UTR_variant,intron_variant                                                                |
| rs1436933061 | intron_variant,genic_upstream_transcript_variant                                                  |
| rs1437002570 | intron_variant                                                                                    |
| rs1437011530 | intron_variant,genic_upstream_transcript_variant                                                  |
| rs1437060610 | intron_variant,genic_downstream_transcript_variant                                                |
| rs1437100491 | intron_variant                                                                                    |
| rs1437108664 | intron_variant,genic_upstream_transcript_variant                                                  |
| rs1437117565 | intron_variant,genic_downstream_transcript_variant                                                |
| rs1437118480 | intron_variant                                                                                    |
| rs1437131858 | intron_variant,genic_upstream_transcript_variant,2KB_upstream_variant,upstream_transcript_variant |
| rs1437134190 | intron_variant                                                                                    |
| rs1437167107 | intron_variant                                                                                    |
| rs1437220287 | genic_downstream_transcript_variant,non_coding_transcript_variant,3_prime_UTR_variant             |
| rs1437234110 | intron_variant,genic_upstream_transcript_variant                                                  |
| rs1437274566 | intron_variant,genic_downstream_transcript_variant                                                |
| rs1437284090 | intron_variant                                                                                    |
| rs1437315426 | intron_variant                                                                                    |
| rs1437378529 | intron_variant                                                                                    |
| rs1437392330 | intron_variant                                                                                    |
| rs1437396710 | intron_variant                                                                                    |
| rs1437431989 | intron_variant,genic_upstream_transcript_variant,non_coding_transcript_variant                    |
| rs1437444957 | intron_variant,genic_upstream_transcript_variant                                                  |
| rs1437452362 | intron_variant,genic_upstream_transcript_variant                                                  |
| rs1437468055 | intron_variant                                                                                    |
| rs1437473226 | intron_variant                                                                                    |
| rs1437483672 | intron_variant                                                                                    |
| rs1437485082 | intron_variant                                                                                    |
| rs1437532300 | intron_variant                                                                                    |
| rs1437549281 | intron_variant                                                                                    |
| rs1437565357 | intron_variant,genic_upstream_transcript_variant,upstream_transcript_variant                      |
| rs1437572268 | intron_variant                                                                                    |
| rs1437596213 | intron_variant,genic_upstream_transcript_variant                                                  |
| rs1437609354 | intron_variant                                                                                    |
| rs1437624012 | intron_variant,genic_upstream_transcript_variant,upstream_transcript_variant                      |
| rs1437629428 | intron_variant,genic_downstream_transcript_variant                                                |
| rs1437669799 | intron_variant,genic_upstream_transcript_variant                                                  |
| rs1437691322 | intron_variant,genic_downstream_transcript_variant                                                |
| rs1437708425 | intron_variant                                                                                    |

|              |                                                                                                   |
|--------------|---------------------------------------------------------------------------------------------------|
| rs1437716134 | intron_variant,genic_upstream_transcript_variant                                                  |
| rs1437736682 | intron_variant                                                                                    |
| rs1437749474 | intron_variant                                                                                    |
| rs1437767109 | intron_variant                                                                                    |
| rs1437779258 | intron_variant,downstream_transcript_variant,genic_downstream_transcript_variant                  |
| rs1437808223 | intron_variant,genic_upstream_transcript_variant                                                  |
| rs1437839721 | intron_variant,genic_upstream_transcript_variant                                                  |
| rs1437862028 | intron_variant,genic_upstream_transcript_variant                                                  |
| rs1437881445 | intron_variant,genic_downstream_transcript_variant                                                |
| rs1437909870 | intron_variant                                                                                    |
| rs1437944478 | intron_variant,genic_upstream_transcript_variant                                                  |
| rs1438001518 | intron_variant,genic_upstream_transcript_variant                                                  |
| rs1438043003 | intron_variant,genic_upstream_transcript_variant                                                  |
| rs1438050335 | intron_variant,genic_upstream_transcript_variant                                                  |
| rs1438102219 | intron_variant,genic_downstream_transcript_variant                                                |
| rs1438115727 | intron_variant,genic_upstream_transcript_variant                                                  |
| rs1438131275 | intron_variant,genic_upstream_transcript_variant                                                  |
| rs1438151978 | intron_variant,genic_downstream_transcript_variant                                                |
| rs1438184442 | intron_variant,genic_downstream_transcript_variant                                                |
| rs1438192610 | intron_variant,genic_upstream_transcript_variant                                                  |
| rs1438198866 | intron_variant                                                                                    |
| rs1438228501 | intron_variant,genic_upstream_transcript_variant                                                  |
| rs1438232601 | intron_variant,genic_downstream_transcript_variant                                                |
| rs1438240355 | intron_variant,genic_upstream_transcript_variant,upstream_transcript_variant                      |
| rs1438286391 | intron_variant,genic_upstream_transcript_variant                                                  |
| rs1438310753 | intron_variant,genic_upstream_transcript_variant                                                  |
| rs1438452116 | intron_variant,genic_upstream_transcript_variant                                                  |
| rs1438473828 | intron_variant,genic_downstream_transcript_variant                                                |
| rs1438485081 | intron_variant                                                                                    |
| rs1438510439 | intron_variant,genic_upstream_transcript_variant,2KB_upstream_variant,upstream_transcript_variant |
| rs1438528358 | intron_variant,genic_upstream_transcript_variant                                                  |
| rs1438536030 | intron_variant,genic_upstream_transcript_variant,2KB_upstream_variant,upstream_transcript_variant |
| rs1438546473 | intron_variant,genic_upstream_transcript_variant                                                  |
| rs1438559140 | intron_variant                                                                                    |
| rs1438615066 | intron_variant,genic_downstream_transcript_variant                                                |
| rs1438649843 | intron_variant,genic_upstream_transcript_variant                                                  |
| rs1438708725 | intron_variant                                                                                    |
| rs1438720312 | intron_variant,genic_upstream_transcript_variant                                                  |
| rs1438748954 | intron_variant,genic_downstream_transcript_variant                                                |
| rs1438759460 | intron_variant,genic_downstream_transcript_variant                                                |
| rs1438765468 | intron_variant,genic_downstream_transcript_variant                                                |
| rs1438879342 | intron_variant                                                                                    |
| rs1438905380 | intron_variant,genic_upstream_transcript_variant                                                  |
| rs1438908777 | genic_downstream_transcript_variant,non_coding_transcript_variant,3_prime_UTR_variant             |
| rs1438952536 | intron_variant,genic_downstream_transcript_variant                                                |
| rs1438963952 | intron_variant,genic_upstream_transcript_variant                                                  |
| rs1438967407 | intron_variant                                                                                    |
| rs1438978997 | intron_variant,genic_downstream_transcript_variant                                                |
| rs1439099499 | intron_variant,genic_downstream_transcript_variant                                                |
| rs1439105959 | intron_variant,genic_upstream_transcript_variant                                                  |
| rs1439113822 | intron_variant,genic_upstream_transcript_variant,2KB_upstream_variant,upstream_transcript_variant |
| rs1439179452 | intron_variant                                                                                    |
| rs1439219677 | intron_variant,genic_upstream_transcript_variant                                                  |
| rs1439231722 | intron_variant                                                                                    |
| rs1439255593 | intron_variant                                                                                    |
| rs1439279034 | intron_variant                                                                                    |
| rs1439328802 | intron_variant,genic_upstream_transcript_variant                                                  |
| rs1439365648 | intron_variant,genic_upstream_transcript_variant,upstream_transcript_variant                      |
| rs1439381016 | intron_variant,genic_upstream_transcript_variant                                                  |
| rs1439382703 | intron_variant,genic_upstream_transcript_variant                                                  |
| rs1439436813 | intron_variant,genic_upstream_transcript_variant                                                  |
| rs1439445236 | intron_variant                                                                                    |
| rs1439457079 | intron_variant                                                                                    |
| rs1439494694 | intron_variant                                                                                    |
| rs1439511174 | intron_variant,genic_downstream_transcript_variant                                                |
| rs1439535149 | intron_variant                                                                                    |
| rs1439557706 | intron_variant                                                                                    |
| rs1439566047 | intron_variant                                                                                    |
| rs1439617369 | intron_variant,genic_upstream_transcript_variant                                                  |
| rs1439628192 | intron_variant                                                                                    |
| rs1439665841 | intron_variant                                                                                    |
| rs1439670618 | intron_variant                                                                                    |
| rs1439670837 | intron_variant,genic_downstream_transcript_variant                                                |
| rs1439703750 | intron_variant,genic_upstream_transcript_variant                                                  |

|              |                                                                                                   |
|--------------|---------------------------------------------------------------------------------------------------|
| rs1439708952 | intron_variant,genic_downstream_transcript_variant                                                |
| rs1439709860 | intron_variant                                                                                    |
| rs1439721481 | intron_variant,genic_upstream_transcript_variant                                                  |
| rs1439770968 | intron_variant                                                                                    |
| rs1439849928 | intron_variant,genic_upstream_transcript_variant,2KB_upstream_variant,upstream_transcript_variant |
| rs1439852002 | intron_variant,genic_upstream_transcript_variant                                                  |
| rs1439905873 | intron_variant,genic_upstream_transcript_variant                                                  |
| rs1439916111 | intron_variant,genic_upstream_transcript_variant,upstream_transcript_variant                      |
| rs1439952494 | intron_variant                                                                                    |
| rs1439968925 | intron_variant,genic_upstream_transcript_variant                                                  |
| rs1439994290 | intron_variant,genic_upstream_transcript_variant                                                  |
| rs1440009774 | intron_variant,genic_upstream_transcript_variant                                                  |
| rs1440010692 | intron_variant,genic_upstream_transcript_variant                                                  |
| rs1440030328 | intron_variant                                                                                    |
| rs1440046371 | intron_variant,genic_upstream_transcript_variant                                                  |
| rs1440046822 | intron_variant,genic_upstream_transcript_variant                                                  |
| rs1440134288 | intron_variant                                                                                    |
| rs1440156485 | intron_variant,genic_upstream_transcript_variant                                                  |
| rs1440158497 | intron_variant,genic_upstream_transcript_variant                                                  |
| rs1440179169 | intron_variant,genic_upstream_transcript_variant                                                  |
| rs1440198420 | intron_variant                                                                                    |
| rs1440205140 | intron_variant,genic_downstream_transcript_variant                                                |
| rs1440277517 | intron_variant                                                                                    |
| rs1440290046 | intron_variant,genic_upstream_transcript_variant                                                  |
| rs1440301773 | intron_variant,genic_upstream_transcript_variant                                                  |
| rs1440302599 | intron_variant                                                                                    |
| rs1440380089 | intron_variant                                                                                    |
| rs1440413164 | intron_variant                                                                                    |
| rs1440423028 | intron_variant                                                                                    |
| rs1440463360 | intron_variant,genic_upstream_transcript_variant,2KB_upstream_variant,upstream_transcript_variant |
| rs1440464907 | intron_variant,genic_downstream_transcript_variant                                                |
| rs1440486392 | intron_variant                                                                                    |
| rs1440490811 | intron_variant,genic_upstream_transcript_variant                                                  |
| rs1440546304 | intron_variant,genic_upstream_transcript_variant                                                  |
| rs1440584800 | intron_variant,genic_downstream_transcript_variant                                                |
| rs1440645474 | intron_variant,genic_upstream_transcript_variant                                                  |
| rs1440659811 | intron_variant                                                                                    |
| rs1440666097 | genic_downstream_transcript_variant,non_coding_transcript_variant,3_prime_UTR_variant             |
| rs1440668430 | intron_variant                                                                                    |
| rs1440698145 | intron_variant                                                                                    |
| rs1440705422 | intron_variant,genic_upstream_transcript_variant                                                  |
| rs1440733976 | intron_variant,genic_downstream_transcript_variant                                                |
| rs1440741109 | intron_variant,genic_upstream_transcript_variant                                                  |
| rs1440791383 | intron_variant                                                                                    |
| rs1440807671 | intron_variant                                                                                    |
| rs1440821150 | intron_variant                                                                                    |
| rs1440825320 | intron_variant,genic_downstream_transcript_variant                                                |
| rs1440844359 | intron_variant                                                                                    |
| rs1440851397 | intron_variant,genic_upstream_transcript_variant,2KB_upstream_variant,upstream_transcript_variant |
| rs1440878752 | intron_variant,genic_upstream_transcript_variant                                                  |
| rs1440891595 | intron_variant,genic_upstream_transcript_variant,2KB_upstream_variant,upstream_transcript_variant |
| rs1440894147 | intron_variant,genic_downstream_transcript_variant                                                |
| rs1440897950 | intron_variant,genic_upstream_transcript_variant                                                  |
| rs1440959096 | intron_variant,genic_downstream_transcript_variant                                                |
| rs1440995066 | intron_variant,genic_downstream_transcript_variant                                                |
| rs1441004116 | intron_variant                                                                                    |
| rs1441024422 | intron_variant                                                                                    |
| rs1441065788 | intron_variant,genic_downstream_transcript_variant                                                |
| rs1441134243 | intron_variant,genic_upstream_transcript_variant                                                  |
| rs1441143099 | intron_variant                                                                                    |
| rs1441160738 | intron_variant,genic_downstream_transcript_variant                                                |
| rs1441201201 | intron_variant                                                                                    |
| rs1441252473 | intron_variant,genic_upstream_transcript_variant                                                  |
| rs1441258804 | intron_variant,genic_upstream_transcript_variant                                                  |
| rs1441339856 | intron_variant                                                                                    |
| rs1441341168 | intron_variant,genic_upstream_transcript_variant,upstream_transcript_variant                      |
| rs1441343210 | intron_variant,genic_upstream_transcript_variant                                                  |
| rs1441360849 | intron_variant                                                                                    |
| rs1441366936 | intron_variant,genic_upstream_transcript_variant                                                  |
| rs1441437317 | intron_variant,genic_downstream_transcript_variant                                                |
| rs1441439318 | intron_variant,genic_upstream_transcript_variant                                                  |
| rs1441530431 | intron_variant,genic_upstream_transcript_variant                                                  |
| rs1441533020 | intron_variant                                                                                    |
| rs1441538198 | intron_variant                                                                                    |

|              |                                                                                                            |
|--------------|------------------------------------------------------------------------------------------------------------|
| rs1441557156 | intron_variant,genic_downstream_transcript_variant                                                         |
| rs1441571339 | intron_variant                                                                                             |
| rs1441571719 | intron_variant                                                                                             |
| rs1441592074 | intron_variant                                                                                             |
| rs1441608528 | intron_variant                                                                                             |
| rs1441630311 | intron_variant,genic_upstream_transcript_variant                                                           |
| rs1441664087 | intron_variant,genic_upstream_transcript_variant                                                           |
| rs1441677642 | intron_variant                                                                                             |
| rs1441696183 | intron_variant,genic_downstream_transcript_variant                                                         |
| rs1441703570 | intron_variant                                                                                             |
| rs1441716383 | intron_variant,genic_upstream_transcript_variant                                                           |
| rs1441773448 | intron_variant,genic_upstream_transcript_variant                                                           |
| rs1441837192 | intron_variant,genic_upstream_transcript_variant                                                           |
| rs1441845537 | intron_variant                                                                                             |
| rs1441905805 | intron_variant                                                                                             |
| rs1441966958 | intron_variant                                                                                             |
| rs1441987522 | intron_variant                                                                                             |
| rs1442007237 | intron_variant,genic_upstream_transcript_variant                                                           |
| rs1442009256 | intron_variant,genic_downstream_transcript_variant                                                         |
| rs1442033161 | coding_sequence_variant,non_coding_transcript_variant,genic_downstream_transcript_variant,missense_variant |
| rs1442056998 | intron_variant                                                                                             |
| rs1442064323 | intron_variant,genic_downstream_transcript_variant                                                         |
| rs1442133748 | intron_variant,genic_upstream_transcript_variant                                                           |
| rs1442179237 | intron_variant,genic_upstream_transcript_variant                                                           |
| rs1442196158 | intron_variant                                                                                             |
| rs1442233904 | intron_variant,genic_upstream_transcript_variant                                                           |
| rs1442282293 | intron_variant,genic_downstream_transcript_variant                                                         |
| rs1442291961 | intron_variant,genic_upstream_transcript_variant                                                           |
| rs1442314015 | intron_variant,genic_upstream_transcript_variant,upstream_transcript_variant                               |
| rs1442356969 | intron_variant                                                                                             |
| rs1442361796 | intron_variant,genic_upstream_transcript_variant                                                           |
| rs1442364503 | intron_variant,genic_upstream_transcript_variant                                                           |
| rs1442388655 | intron_variant,downstream_transcript_variant,genic_downstream_transcript_variant                           |
| rs1442439194 | intron_variant,genic_downstream_transcript_variant                                                         |
| rs1442468446 | intron_variant                                                                                             |
| rs1442485111 | intron_variant,genic_upstream_transcript_variant                                                           |
| rs1442497632 | intron_variant                                                                                             |
| rs1442519055 | intron_variant,genic_upstream_transcript_variant                                                           |
| rs1442521366 | intron_variant                                                                                             |
| rs1442545694 | intron_variant,genic_upstream_transcript_variant                                                           |
| rs1442570633 | intron_variant,genic_upstream_transcript_variant                                                           |
| rs1442616328 | 5_prime_UTR_variant,intron_variant,genic_upstream_transcript_variant,upstream_transcript_variant           |
| rs1442684871 | intron_variant,genic_upstream_transcript_variant                                                           |
| rs1442699108 | intron_variant,genic_upstream_transcript_variant                                                           |
| rs1442702228 | intron_variant                                                                                             |
| rs1442730113 | intron_variant,genic_upstream_transcript_variant                                                           |
| rs1442758267 | intron_variant,genic_downstream_transcript_variant                                                         |
| rs1442779830 | intron_variant                                                                                             |
| rs1442787118 | intron_variant,genic_upstream_transcript_variant                                                           |
| rs1442797154 | intron_variant,genic_upstream_transcript_variant,2KB_upstream_variant,upstream_transcript_variant          |
| rs1442851708 | intron_variant,genic_downstream_transcript_variant                                                         |
| rs1442854793 | intron_variant,genic_upstream_transcript_variant                                                           |
| rs1442859159 | intron_variant,genic_upstream_transcript_variant                                                           |
| rs1442868774 | intron_variant,genic_upstream_transcript_variant                                                           |
| rs1442900099 | intron_variant                                                                                             |
| rs1442929368 | intron_variant                                                                                             |
| rs1442968412 | intron_variant,genic_upstream_transcript_variant                                                           |
| rs1442968796 | intron_variant                                                                                             |
| rs1442985593 | intron_variant,genic_upstream_transcript_variant                                                           |
| rs1442995520 | intron_variant,genic_upstream_transcript_variant                                                           |
| rs1443017896 | intron_variant,genic_downstream_transcript_variant                                                         |
| rs1443038219 | intron_variant,genic_upstream_transcript_variant                                                           |
| rs1443061456 | intron_variant,genic_upstream_transcript_variant                                                           |
| rs1443073415 | intron_variant,genic_downstream_transcript_variant                                                         |
| rs1443100284 | intron_variant,genic_upstream_transcript_variant                                                           |
| rs1443106939 | intron_variant,genic_downstream_transcript_variant                                                         |
| rs1443163908 | intron_variant,genic_upstream_transcript_variant                                                           |
| rs1443169565 | intron_variant,genic_downstream_transcript_variant                                                         |
| rs1443206945 | intron_variant                                                                                             |
| rs1443262966 | intron_variant,genic_upstream_transcript_variant                                                           |
| rs1443288289 | intron_variant                                                                                             |
| rs1443296924 | intron_variant,genic_upstream_transcript_variant                                                           |
| rs1443355410 | intron_variant,genic_upstream_transcript_variant,upstream_transcript_variant                               |
| rs1443357429 | intron_variant                                                                                             |

|              |                                                                                                   |
|--------------|---------------------------------------------------------------------------------------------------|
| rs1443404024 | intron_variant,downstream_transcript_variant,genic_downstream_transcript_variant                  |
| rs1443449604 | intron_variant                                                                                    |
| rs1443450013 | genic_downstream_transcript_variant,non_coding_transcript_variant,3_prime_UTR_variant             |
| rs1443482824 | intron_variant,genic_upstream_transcript_variant                                                  |
| rs1443564966 | genic_downstream_transcript_variant,non_coding_transcript_variant,3_prime_UTR_variant             |
| rs1443595867 | intron_variant,genic_upstream_transcript_variant                                                  |
| rs1443613503 | intron_variant                                                                                    |
| rs1443632184 | intron_variant,genic_upstream_transcript_variant                                                  |
| rs1443654497 | intron_variant                                                                                    |
| rs1443657580 | intron_variant,genic_upstream_transcript_variant                                                  |
| rs1443684031 | 5_prime_UTR_variant,intron_variant,genic_upstream_transcript_variant,upstream_transcript_variant  |
| rs1443710471 | intron_variant,genic_upstream_transcript_variant                                                  |
| rs1443710904 | intron_variant,genic_upstream_transcript_variant                                                  |
| rs1443754216 | intron_variant                                                                                    |
| rs1443767620 | intron_variant,genic_downstream_transcript_variant                                                |
| rs1443786286 | intron_variant                                                                                    |
| rs1443853339 | intron_variant,genic_upstream_transcript_variant,upstream_transcript_variant                      |
| rs1443857547 | intron_variant                                                                                    |
| rs1443874447 | intron_variant,genic_upstream_transcript_variant                                                  |
| rs1443946973 | intron_variant,genic_downstream_transcript_variant                                                |
| rs1444047447 | intron_variant                                                                                    |
| rs1444088056 | intron_variant                                                                                    |
| rs1444099719 | intron_variant,genic_upstream_transcript_variant,2KB_upstream_variant,upstream_transcript_variant |
| rs1444124149 | intron_variant                                                                                    |
| rs1444228421 | intron_variant,genic_upstream_transcript_variant                                                  |
| rs1444257484 | intron_variant,genic_downstream_transcript_variant                                                |
| rs1444294291 | intron_variant                                                                                    |
| rs1444303132 | intron_variant,genic_downstream_transcript_variant                                                |
| rs1444304903 | intron_variant,genic_upstream_transcript_variant                                                  |
| rs1444311107 | intron_variant                                                                                    |
| rs1444318186 | intron_variant                                                                                    |
| rs1444366603 | intron_variant,genic_upstream_transcript_variant,2KB_upstream_variant,upstream_transcript_variant |
| rs1444375628 | intron_variant,genic_downstream_transcript_variant                                                |
| rs1444382256 | intron_variant                                                                                    |
| rs1444437446 | intron_variant                                                                                    |
| rs1444503446 | intron_variant,genic_upstream_transcript_variant                                                  |
| rs1444523758 | intron_variant,genic_upstream_transcript_variant                                                  |
| rs1444542934 | intron_variant                                                                                    |
| rs1444552480 | intron_variant,genic_downstream_transcript_variant                                                |
| rs1444558418 | intron_variant                                                                                    |
| rs1444586008 | intron_variant                                                                                    |
| rs1444598035 | intron_variant,genic_upstream_transcript_variant                                                  |
| rs1444619207 | intron_variant,genic_upstream_transcript_variant,2KB_upstream_variant,upstream_transcript_variant |
| rs1444624376 | intron_variant                                                                                    |
| rs1444658555 | intron_variant                                                                                    |
| rs1444670424 | intron_variant,genic_downstream_transcript_variant                                                |
| rs1444686986 | intron_variant,genic_downstream_transcript_variant                                                |
| rs1444710732 | intron_variant,genic_upstream_transcript_variant                                                  |
| rs1444748563 | intron_variant,genic_upstream_transcript_variant,upstream_transcript_variant                      |
| rs1444786251 | intron_variant,genic_upstream_transcript_variant,upstream_transcript_variant                      |
| rs1444795762 | genic_downstream_transcript_variant,non_coding_transcript_variant,3_prime_UTR_variant             |
| rs1444852042 | 5_prime_UTR_variant,intron_variant,genic_upstream_transcript_variant,upstream_transcript_variant  |
| rs1444862137 | intron_variant,genic_upstream_transcript_variant                                                  |
| rs1444880948 | genic_downstream_transcript_variant,non_coding_transcript_variant,3_prime_UTR_variant             |
| rs1444923949 | intron_variant                                                                                    |
| rs1444954230 | intron_variant,genic_upstream_transcript_variant                                                  |
| rs1444984092 | intron_variant                                                                                    |
| rs1444994776 | intron_variant,genic_downstream_transcript_variant                                                |
| rs1445021007 | intron_variant                                                                                    |
| rs1445021763 | intron_variant                                                                                    |
| rs1445031347 | intron_variant,genic_upstream_transcript_variant                                                  |
| rs1445075043 | intron_variant                                                                                    |
| rs1445075418 | intron_variant                                                                                    |
| rs1445121623 | coding_sequence_variant,synonymous_variant,non_coding_transcript_variant                          |
| rs1445147879 | intron_variant,genic_upstream_transcript_variant                                                  |
| rs1445223680 | intron_variant,genic_downstream_transcript_variant                                                |
| rs1445281475 | intron_variant,genic_upstream_transcript_variant                                                  |
| rs1445305898 | intron_variant,genic_upstream_transcript_variant                                                  |
| rs1445307071 | intron_variant,genic_downstream_transcript_variant                                                |
| rs1445317593 | intron_variant,genic_upstream_transcript_variant                                                  |
| rs1445324911 | intron_variant,genic_downstream_transcript_variant                                                |
| rs1445326512 | intron_variant,genic_upstream_transcript_variant,upstream_transcript_variant                      |
| rs1445335059 | intron_variant,genic_upstream_transcript_variant                                                  |
| rs1445404260 | intron_variant,genic_downstream_transcript_variant                                                |

|              |                                                                                                   |
|--------------|---------------------------------------------------------------------------------------------------|
| rs1445405600 | intron_variant,genic_upstream_transcript_variant,2KB_upstream_variant,upstream_transcript_variant |
| rs1445427882 | intron_variant                                                                                    |
| rs1445431223 | intron_variant                                                                                    |
| rs1445453647 | intron_variant                                                                                    |
| rs1445487679 | intron_variant,genic_downstream_transcript_variant                                                |
| rs1445515686 | intron_variant,genic_upstream_transcript_variant                                                  |
| rs1445558360 | intron_variant,genic_downstream_transcript_variant                                                |
| rs1445587801 | intron_variant,genic_downstream_transcript_variant                                                |
| rs1445611867 | intron_variant                                                                                    |
| rs1445644732 | intron_variant                                                                                    |
| rs1445653912 | intron_variant,genic_upstream_transcript_variant                                                  |
| rs1445656851 | intron_variant                                                                                    |
| rs1445711582 | intron_variant,genic_downstream_transcript_variant                                                |
| rs1445772904 | intron_variant                                                                                    |
| rs1445787783 | intron_variant,genic_upstream_transcript_variant                                                  |
| rs1445794545 | intron_variant,genic_upstream_transcript_variant,2KB_upstream_variant,upstream_transcript_variant |
| rs1445823660 | intron_variant                                                                                    |
| rs1445866185 | intron_variant,genic_downstream_transcript_variant                                                |
| rs1445927959 | intron_variant,genic_downstream_transcript_variant                                                |
| rs1445936618 | intron_variant,genic_downstream_transcript_variant                                                |
| rs1445948621 | intron_variant,genic_upstream_transcript_variant                                                  |
| rs1445950878 | intron_variant,genic_upstream_transcript_variant                                                  |
| rs1445964223 | intron_variant,genic_upstream_transcript_variant                                                  |
| rs1445967834 | intron_variant,genic_upstream_transcript_variant                                                  |
| rs1446006228 | intron_variant                                                                                    |
| rs1446059878 | intron_variant                                                                                    |
| rs1446104968 | intron_variant                                                                                    |
| rs1446112030 | intron_variant,genic_upstream_transcript_variant,2KB_upstream_variant,upstream_transcript_variant |
| rs1446128287 | intron_variant,genic_upstream_transcript_variant                                                  |
| rs1446170462 | intron_variant,genic_downstream_transcript_variant                                                |
| rs1446221027 | intron_variant                                                                                    |
| rs1446254278 | intron_variant,genic_downstream_transcript_variant                                                |
| rs1446280624 | intron_variant,genic_upstream_transcript_variant                                                  |
| rs1446315437 | intron_variant                                                                                    |
| rs1446336684 | intron_variant,genic_upstream_transcript_variant                                                  |
| rs1446376609 | intron_variant                                                                                    |
| rs1446394707 | intron_variant                                                                                    |
| rs1446417281 | intron_variant,genic_upstream_transcript_variant                                                  |
| rs1446420652 | intron_variant                                                                                    |
| rs1446423671 | intron_variant,genic_downstream_transcript_variant                                                |
| rs1446451700 | intron_variant,genic_upstream_transcript_variant                                                  |
| rs1446467818 | intron_variant                                                                                    |
| rs1446529483 | intron_variant,genic_upstream_transcript_variant                                                  |
| rs1446544246 | intron_variant,genic_downstream_transcript_variant                                                |
| rs1446546769 | intron_variant,genic_upstream_transcript_variant,upstream_transcript_variant                      |
| rs1446575309 | intron_variant,genic_downstream_transcript_variant                                                |
| rs1446601186 | intron_variant,genic_upstream_transcript_variant                                                  |
| rs1446697799 | intron_variant                                                                                    |
| rs1446741457 | intron_variant,genic_upstream_transcript_variant                                                  |
| rs1446742412 | intron_variant,genic_upstream_transcript_variant                                                  |
| rs1446763129 | intron_variant,genic_upstream_transcript_variant                                                  |
| rs1446799912 | intron_variant                                                                                    |
| rs1446825274 | intron_variant,genic_downstream_transcript_variant                                                |
| rs1446827883 | intron_variant,genic_upstream_transcript_variant,2KB_upstream_variant,upstream_transcript_variant |
| rs1446837174 | intron_variant                                                                                    |
| rs1446850277 | intron_variant,genic_downstream_transcript_variant                                                |
| rs1446878610 | intron_variant,genic_upstream_transcript_variant,2KB_upstream_variant,upstream_transcript_variant |
| rs1446950110 | intron_variant,genic_downstream_transcript_variant                                                |
| rs1446952689 | intron_variant,genic_upstream_transcript_variant                                                  |
| rs1446999225 | intron_variant,genic_upstream_transcript_variant                                                  |
| rs1447077979 | intron_variant,genic_upstream_transcript_variant                                                  |
| rs1447085665 | genic_downstream_transcript_variant,intron_variant                                                |
| rs1447117276 | genic_downstream_transcript_variant,intron_variant                                                |
| rs1447171584 | intron_variant,genic_upstream_transcript_variant                                                  |
| rs1447178674 | intron_variant                                                                                    |
| rs1447194968 | intron_variant,genic_upstream_transcript_variant                                                  |
| rs1447241911 | genic_downstream_transcript_variant,intron_variant                                                |
| rs1447294010 | genic_downstream_transcript_variant,non_coding_transcript_variant,3_prime_UTR_variant             |
| rs1447302126 | intron_variant,2KB_upstream_variant,upstream_transcript_variant,genic_upstream_transcript_variant |
| rs1447303234 | intron_variant,upstream_transcript_variant,genic_upstream_transcript_variant                      |
| rs1447304750 | intron_variant                                                                                    |
| rs1447310321 | genic_downstream_transcript_variant,intron_variant                                                |
| rs1447334920 | intron_variant,genic_upstream_transcript_variant                                                  |
| rs1447373165 | genic_downstream_transcript_variant,intron_variant                                                |

|              |                                                                                                   |
|--------------|---------------------------------------------------------------------------------------------------|
| rs1447406290 | genic_downstream_transcript_variant,intron_variant                                                |
| rs1447409236 | intron_variant,genic_upstream_transcript_variant                                                  |
| rs1447422345 | intron_variant,genic_upstream_transcript_variant                                                  |
| rs1447446605 | intron_variant,genic_upstream_transcript_variant                                                  |
| rs1447461127 | intron_variant,genic_upstream_transcript_variant                                                  |
| rs1447502492 | intron_variant,genic_upstream_transcript_variant                                                  |
| rs1447515910 | intron_variant,genic_upstream_transcript_variant                                                  |
| rs1447525785 | intron_variant,genic_upstream_transcript_variant                                                  |
| rs1447529225 | intron_variant,genic_upstream_transcript_variant                                                  |
| rs1447563757 | intron_variant,genic_upstream_transcript_variant                                                  |
| rs1447584197 | intron_variant,genic_upstream_transcript_variant                                                  |
| rs1447616518 | genic_downstream_transcript_variant,non_coding_transcript_variant,3_prime_UTR_variant             |
| rs1447657097 | intron_variant,2KB_upstream_variant,upstream_transcript_variant,genic_upstream_transcript_variant |
| rs1447669310 | intron_variant                                                                                    |
| rs1447694084 | genic_downstream_transcript_variant,intron_variant                                                |
| rs1447787530 | intron_variant,genic_upstream_transcript_variant                                                  |
| rs1447818720 | intron_variant                                                                                    |
| rs1447823042 | intron_variant,genic_upstream_transcript_variant                                                  |
| rs1447872309 | intron_variant,genic_upstream_transcript_variant                                                  |
| rs1447920824 | intron_variant,genic_upstream_transcript_variant                                                  |
| rs1447957434 | intron_variant,genic_upstream_transcript_variant                                                  |
| rs1448004021 | intron_variant                                                                                    |
| rs1448034553 | intron_variant                                                                                    |
| rs1448040800 | intron_variant,genic_upstream_transcript_variant                                                  |
| rs1448051974 | intron_variant,upstream_transcript_variant,genic_upstream_transcript_variant                      |
| rs1448096556 | intron_variant                                                                                    |
| rs1448102098 | genic_downstream_transcript_variant,intron_variant                                                |
| rs1448163855 | intron_variant,upstream_transcript_variant,genic_upstream_transcript_variant                      |
| rs1448224184 | intron_variant,genic_upstream_transcript_variant                                                  |
| rs1448240893 | intron_variant                                                                                    |
| rs1448249129 | intron_variant                                                                                    |
| rs1448273895 | intron_variant                                                                                    |
| rs1448319901 | intron_variant                                                                                    |
| rs1448332767 | intron_variant                                                                                    |
| rs1448355118 | intron_variant                                                                                    |
| rs1448421810 | intron_variant,genic_upstream_transcript_variant                                                  |
| rs1448472584 | intron_variant                                                                                    |
| rs1448485621 | intron_variant,genic_upstream_transcript_variant                                                  |
| rs1448486609 | intron_variant                                                                                    |
| rs1448503614 | intron_variant                                                                                    |
| rs1448515729 | intron_variant                                                                                    |
| rs1448515913 | genic_downstream_transcript_variant,intron_variant                                                |
| rs1448518903 | intron_variant                                                                                    |
| rs1448539890 | intron_variant                                                                                    |
| rs1448549940 | intron_variant                                                                                    |
| rs1448556741 | intron_variant                                                                                    |
| rs1448571208 | intron_variant,genic_upstream_transcript_variant                                                  |
| rs1448577527 | intron_variant,genic_upstream_transcript_variant                                                  |
| rs1448600869 | genic_downstream_transcript_variant,intron_variant                                                |
| rs1448605219 | intron_variant,genic_upstream_transcript_variant                                                  |
| rs1448658512 | intron_variant,genic_upstream_transcript_variant                                                  |
| rs1448665377 | genic_downstream_transcript_variant,intron_variant                                                |
| rs1448668865 | intron_variant                                                                                    |
| rs1448671801 | intron_variant                                                                                    |
| rs1448706064 | intron_variant                                                                                    |
| rs1448706226 | intron_variant                                                                                    |
| rs1448735974 | intron_variant                                                                                    |
| rs1448753961 | intron_variant,genic_upstream_transcript_variant                                                  |
| rs1448760775 | intron_variant,genic_upstream_transcript_variant                                                  |
| rs1448780839 | intron_variant,genic_upstream_transcript_variant                                                  |
| rs1448782491 | intron_variant                                                                                    |
| rs1448783324 | intron_variant                                                                                    |
| rs1448874389 | intron_variant                                                                                    |
| rs1448931895 | intron_variant,genic_upstream_transcript_variant                                                  |
| rs1448941622 | intron_variant,2KB_upstream_variant,upstream_transcript_variant,genic_upstream_transcript_variant |
| rs1448959323 | intron_variant                                                                                    |
| rs1448963785 | intron_variant                                                                                    |
| rs1448965564 | intron_variant,genic_upstream_transcript_variant                                                  |
| rs1449041011 | intron_variant,genic_upstream_transcript_variant                                                  |
| rs1449094867 | genic_downstream_transcript_variant,intron_variant                                                |
| rs1449125475 | genic_downstream_transcript_variant,intron_variant                                                |
| rs1449127420 | intron_variant,2KB_upstream_variant,upstream_transcript_variant,genic_upstream_transcript_variant |
| rs1449145121 | intron_variant                                                                                    |
| rs1449147155 | intron_variant,genic_upstream_transcript_variant                                                  |

|              |                                                                                                   |
|--------------|---------------------------------------------------------------------------------------------------|
| rs1449149070 | intron_variant                                                                                    |
| rs1449149302 | intron_variant,genic_upstream_transcript_variant                                                  |
| rs1449154388 | intron_variant,genic_upstream_transcript_variant                                                  |
| rs1449201119 | intron_variant                                                                                    |
| rs1449226043 | intron_variant,genic_upstream_transcript_variant                                                  |
| rs1449257647 | intron_variant,genic_upstream_transcript_variant                                                  |
| rs1449267886 | intron_variant                                                                                    |
| rs1449298285 | intron_variant,genic_upstream_transcript_variant                                                  |
| rs1449312008 | genic_downstream_transcript_variant,intron_variant                                                |
| rs1449342390 | intron_variant,genic_upstream_transcript_variant                                                  |
| rs1449398596 | intron_variant,genic_upstream_transcript_variant                                                  |
| rs1449416038 | intron_variant,genic_upstream_transcript_variant                                                  |
| rs1449434628 | intron_variant                                                                                    |
| rs1449529740 | genic_downstream_transcript_variant,intron_variant,downstream_transcript_variant                  |
| rs1449530733 | intron_variant,2KB_upstream_variant,upstream_transcript_variant,genic_upstream_transcript_variant |
| rs1449534827 | intron_variant                                                                                    |
| rs1449543084 | genic_downstream_transcript_variant,intron_variant                                                |
| rs1449633106 | genic_downstream_transcript_variant,intron_variant                                                |
| rs1449637503 | intron_variant                                                                                    |
| rs1449674619 | intron_variant                                                                                    |
| rs1449682996 | genic_downstream_transcript_variant,intron_variant                                                |
| rs1449688510 | intron_variant                                                                                    |
| rs1449690750 | intron_variant                                                                                    |
| rs1449699458 | genic_downstream_transcript_variant,intron_variant                                                |
| rs1449726871 | intron_variant                                                                                    |
| rs1449775526 | genic_downstream_transcript_variant,intron_variant                                                |
| rs1449793434 | genic_downstream_transcript_variant,intron_variant                                                |
| rs1449800720 | intron_variant,genic_upstream_transcript_variant                                                  |
| rs1449810308 | intron_variant                                                                                    |
| rs1449817462 | intron_variant,genic_upstream_transcript_variant                                                  |
| rs1449847710 | genic_downstream_transcript_variant,intron_variant                                                |
| rs1449898097 | intron_variant,genic_upstream_transcript_variant                                                  |
| rs1449945439 | intron_variant,genic_upstream_transcript_variant                                                  |
| rs1449952552 | genic_downstream_transcript_variant,non_coding_transcript_variant,3_prime_UTR_variant             |
| rs1449996119 | intron_variant,genic_upstream_transcript_variant                                                  |
| rs1450017360 | genic_downstream_transcript_variant,intron_variant                                                |
| rs1450024714 | intron_variant                                                                                    |
| rs1450027274 | intron_variant,upstream_transcript_variant,genic_upstream_transcript_variant                      |
| rs1450046927 | 500B_downstream_variant,downstream_transcript_variant                                             |
| rs1450056874 | intron_variant                                                                                    |
| rs1450063873 | intron_variant                                                                                    |
| rs1450083317 | intron_variant,genic_upstream_transcript_variant                                                  |
| rs1450131513 | intron_variant                                                                                    |
| rs1450150968 | intron_variant                                                                                    |
| rs1450154086 | intron_variant                                                                                    |
| rs1450224009 | intron_variant                                                                                    |
| rs1450255910 | 5_prime_UTR_variant,intron_variant,upstream_transcript_variant,genic_upstream_transcript_variant  |
| rs1450258853 | intron_variant,genic_upstream_transcript_variant                                                  |
| rs1450265791 | genic_downstream_transcript_variant,intron_variant                                                |
| rs1450279142 | genic_downstream_transcript_variant,non_coding_transcript_variant,3_prime_UTR_variant             |
| rs1450330667 | genic_downstream_transcript_variant,intron_variant                                                |
| rs1450392975 | intron_variant,upstream_transcript_variant,genic_upstream_transcript_variant                      |
| rs1450412441 | intron_variant                                                                                    |
| rs1450443192 | intron_variant                                                                                    |
| rs1450448149 | intron_variant                                                                                    |
| rs1450453005 | genic_downstream_transcript_variant,intron_variant                                                |
| rs1450478794 | intron_variant                                                                                    |
| rs1450502953 | intron_variant,genic_upstream_transcript_variant                                                  |
| rs1450504771 | intron_variant                                                                                    |
| rs1450538144 | intron_variant                                                                                    |
| rs1450556347 | intron_variant,genic_upstream_transcript_variant                                                  |
| rs1450588377 | intron_variant,genic_upstream_transcript_variant                                                  |
| rs1450604409 | intron_variant,genic_upstream_transcript_variant                                                  |
| rs1450608134 | intron_variant                                                                                    |
| rs1450651777 | intron_variant                                                                                    |
| rs1450651953 | intron_variant,genic_upstream_transcript_variant                                                  |
| rs1450659866 | intron_variant                                                                                    |
| rs1450709644 | intron_variant,genic_upstream_transcript_variant                                                  |
| rs1450755090 | intron_variant,genic_upstream_transcript_variant                                                  |
| rs1450776979 | intron_variant                                                                                    |
| rs1450792127 | intron_variant,genic_upstream_transcript_variant                                                  |
| rs1450801067 | intron_variant,genic_upstream_transcript_variant                                                  |
| rs1450806065 | genic_downstream_transcript_variant,intron_variant                                                |
| rs1450863705 | intron_variant,genic_upstream_transcript_variant                                                  |

|              |                                                                                                                           |
|--------------|---------------------------------------------------------------------------------------------------------------------------|
| rs1450885120 | intron_variant,genic_upstream_transcript_variant                                                                          |
| rs1450906177 | intron_variant,genic_upstream_transcript_variant,synonymous_variant,coding_sequence_variant,non_coding_transcript_variant |
| rs1450909776 | intron_variant,genic_upstream_transcript_variant                                                                          |
| rs1450943645 | genic_downstream_transcript_variant,intron_variant                                                                        |
| rs1450943988 | intron_variant                                                                                                            |
| rs1450949503 | genic_downstream_transcript_variant,intron_variant                                                                        |
| rs1451000137 | intron_variant,genic_upstream_transcript_variant                                                                          |
| rs1451060545 | intron_variant                                                                                                            |
| rs1451064728 | intron_variant                                                                                                            |
| rs1451071290 | intron_variant,upstream_transcript_variant,genic_upstream_transcript_variant                                              |
| rs1451202062 | intron_variant,genic_upstream_transcript_variant                                                                          |
| rs1451287840 | intron_variant,genic_upstream_transcript_variant                                                                          |
| rs1451347802 | intron_variant,2KB_upstream_variant,upstream_transcript_variant,genic_upstream_transcript_variant                         |
| rs1451363712 | intron_variant                                                                                                            |
| rs1451394426 | intron_variant,upstream_transcript_variant,genic_upstream_transcript_variant                                              |
| rs1451443095 | intron_variant                                                                                                            |
| rs1451458323 | intron_variant,genic_upstream_transcript_variant                                                                          |
| rs1451472823 | genic_downstream_transcript_variant,intron_variant                                                                        |
| rs1451475764 | intron_variant                                                                                                            |
| rs1451501864 | intron_variant                                                                                                            |
| rs1451515707 | intron_variant                                                                                                            |
| rs1451523237 | intron_variant,genic_upstream_transcript_variant                                                                          |
| rs1451534403 | intron_variant,genic_upstream_transcript_variant                                                                          |
| rs1451549590 | intron_variant,genic_upstream_transcript_variant                                                                          |
| rs1451553302 | intron_variant                                                                                                            |
| rs1451640811 | intron_variant,genic_upstream_transcript_variant                                                                          |
| rs1451662563 | intron_variant                                                                                                            |
| rs1451701062 | intron_variant,genic_upstream_transcript_variant                                                                          |
| rs1451716414 | intron_variant                                                                                                            |
| rs1451718723 | coding_sequence_variant,synonymous_variant,non_coding_transcript_variant                                                  |
| rs1451749445 | genic_downstream_transcript_variant,intron_variant                                                                        |
| rs1451771202 | genic_downstream_transcript_variant,non_coding_transcript_variant,3_prime_UTR_variant                                     |
| rs1451777369 | genic_downstream_transcript_variant,intron_variant                                                                        |
| rs1451793261 | intron_variant,genic_upstream_transcript_variant                                                                          |
| rs1451812191 | intron_variant,genic_upstream_transcript_variant                                                                          |
| rs1451866705 | intron_variant,genic_upstream_transcript_variant                                                                          |
| rs1451866776 | intron_variant                                                                                                            |
| rs1451903478 | intron_variant                                                                                                            |
| rs1451919915 | genic_downstream_transcript_variant,intron_variant                                                                        |
| rs1451935647 | intron_variant,upstream_transcript_variant,genic_upstream_transcript_variant                                              |
| rs1451943747 | genic_downstream_transcript_variant,intron_variant                                                                        |
| rs1451954069 | coding_sequence_variant,non_coding_transcript_variant,missense_variant                                                    |
| rs1451980413 | intron_variant                                                                                                            |
| rs1451988777 | intron_variant,upstream_transcript_variant,genic_upstream_transcript_variant                                              |
| rs1452056062 | intron_variant                                                                                                            |
| rs1452066232 | intron_variant,genic_upstream_transcript_variant                                                                          |
| rs1452071962 | genic_downstream_transcript_variant,intron_variant                                                                        |
| rs1452115032 | genic_downstream_transcript_variant,non_coding_transcript_variant,3_prime_UTR_variant                                     |
| rs1452172997 | intron_variant                                                                                                            |
| rs1452219207 | genic_downstream_transcript_variant,intron_variant                                                                        |
| rs1452252502 | intron_variant,genic_upstream_transcript_variant                                                                          |
| rs1452257344 | intron_variant,genic_upstream_transcript_variant                                                                          |
| rs1452286279 | intron_variant,genic_upstream_transcript_variant                                                                          |
| rs1452288384 | intron_variant,genic_upstream_transcript_variant                                                                          |
| rs1452303039 | intron_variant,genic_upstream_transcript_variant                                                                          |
| rs1452325741 | intron_variant                                                                                                            |
| rs1452340452 | intron_variant,genic_upstream_transcript_variant                                                                          |
| rs1452381402 | intron_variant,genic_upstream_transcript_variant                                                                          |
| rs1452416856 | intron_variant                                                                                                            |
| rs1452461998 | intron_variant                                                                                                            |
| rs1452465768 | intron_variant,genic_upstream_transcript_variant                                                                          |
| rs1452475408 | genic_downstream_transcript_variant,intron_variant                                                                        |
| rs1452501755 | intron_variant,genic_upstream_transcript_variant                                                                          |
| rs1452513990 | intron_variant,genic_upstream_transcript_variant                                                                          |
| rs1452604186 | intron_variant,genic_upstream_transcript_variant                                                                          |
| rs1452674834 | genic_downstream_transcript_variant,intron_variant                                                                        |
| rs1452679711 | intron_variant,genic_upstream_transcript_variant                                                                          |
| rs1452722843 | intron_variant,upstream_transcript_variant,genic_upstream_transcript_variant                                              |
| rs1452727189 | intron_variant                                                                                                            |
| rs1452737690 | intron_variant,genic_upstream_transcript_variant                                                                          |
| rs1452785858 | intron_variant                                                                                                            |
| rs1452848504 | genic_downstream_transcript_variant,coding_sequence_variant,synonymous_variant,non_coding_transcript_variant              |
| rs1452850048 | intron_variant,genic_upstream_transcript_variant                                                                          |
| rs1452904952 | intron_variant,genic_upstream_transcript_variant                                                                          |

|              |                                                                                                   |
|--------------|---------------------------------------------------------------------------------------------------|
| rs1452909359 | intron_variant,genic_upstream_transcript_variant                                                  |
| rs1452924621 | intron_variant,genic_upstream_transcript_variant                                                  |
| rs1452981617 | intron_variant,genic_upstream_transcript_variant                                                  |
| rs1453037299 | genic_downstream_transcript_variant,intron_variant                                                |
| rs1453069187 | genic_downstream_transcript_variant,intron_variant                                                |
| rs1453122081 | intron_variant,genic_upstream_transcript_variant                                                  |
| rs1453128167 | intron_variant,genic_upstream_transcript_variant                                                  |
| rs1453194027 | intron_variant                                                                                    |
| rs1453200681 | intron_variant                                                                                    |
| rs1453239888 | intron_variant,genic_upstream_transcript_variant                                                  |
| rs1453250797 | intron_variant,2KB_upstream_variant,upstream_transcript_variant,genic_upstream_transcript_variant |
| rs1453316667 | intron_variant,genic_upstream_transcript_variant                                                  |
| rs1453324511 | intron_variant,genic_upstream_transcript_variant                                                  |
| rs1453372149 | genic_downstream_transcript_variant,intron_variant                                                |
| rs1453378035 | 500B_downstream_variant,downstream_transcript_variant                                             |
| rs1453432004 | genic_downstream_transcript_variant,intron_variant                                                |
| rs1453485464 | intron_variant,genic_upstream_transcript_variant                                                  |
| rs1453571428 | intron_variant,genic_upstream_transcript_variant                                                  |
| rs1453594722 | intron_variant,genic_upstream_transcript_variant                                                  |
| rs1453638954 | intron_variant,genic_upstream_transcript_variant                                                  |
| rs1453666408 | genic_downstream_transcript_variant,intron_variant                                                |
| rs1453682136 | intron_variant,2KB_upstream_variant,upstream_transcript_variant,genic_upstream_transcript_variant |
| rs1453772877 | genic_downstream_transcript_variant,intron_variant                                                |
| rs1453811189 | intron_variant                                                                                    |
| rs1453820430 | intron_variant,genic_upstream_transcript_variant                                                  |
| rs1453825641 | intron_variant,upstream_transcript_variant,genic_upstream_transcript_variant                      |
| rs1453838209 | intron_variant,genic_upstream_transcript_variant                                                  |
| rs1453851167 | genic_downstream_transcript_variant,intron_variant                                                |
| rs1453890954 | intron_variant                                                                                    |
| rs1453935875 | genic_downstream_transcript_variant,intron_variant                                                |
| rs1453947690 | intron_variant,genic_upstream_transcript_variant                                                  |
| rs1453963656 | genic_downstream_transcript_variant,intron_variant                                                |
| rs1453984764 | intron_variant,genic_upstream_transcript_variant                                                  |
| rs1454009222 | intron_variant                                                                                    |
| rs1454011180 | intron_variant                                                                                    |
| rs1454025306 | intron_variant,genic_upstream_transcript_variant                                                  |
| rs1454036960 | intron_variant                                                                                    |
| rs1454042338 | intron_variant                                                                                    |
| rs1454053311 | intron_variant,genic_upstream_transcript_variant                                                  |
| rs1454064898 | intron_variant                                                                                    |
| rs1454066619 | intron_variant                                                                                    |
| rs1454105035 | genic_downstream_transcript_variant,intron_variant                                                |
| rs1454113950 | genic_downstream_transcript_variant,intron_variant                                                |
| rs1454123766 | genic_downstream_transcript_variant,intron_variant                                                |
| rs1454167413 | intron_variant,genic_upstream_transcript_variant                                                  |
| rs1454197784 | intron_variant,genic_upstream_transcript_variant                                                  |
| rs1454232556 | intron_variant,genic_upstream_transcript_variant                                                  |
| rs1454242502 | intron_variant                                                                                    |
| rs1454307589 | intron_variant                                                                                    |
| rs1454315937 | genic_downstream_transcript_variant,intron_variant                                                |
| rs1454338135 | intron_variant                                                                                    |
| rs1454342760 | intron_variant,upstream_transcript_variant,genic_upstream_transcript_variant                      |
| rs1454345522 | intron_variant                                                                                    |
| rs1454362470 | intron_variant,genic_upstream_transcript_variant                                                  |
| rs1454400050 | genic_downstream_transcript_variant,intron_variant                                                |
| rs1454420859 | intron_variant                                                                                    |
| rs1454429595 | intron_variant                                                                                    |
| rs1454435277 | intron_variant,genic_upstream_transcript_variant                                                  |
| rs1454437590 | intron_variant,genic_upstream_transcript_variant                                                  |
| rs1454442669 | intron_variant,2KB_upstream_variant,upstream_transcript_variant,genic_upstream_transcript_variant |
| rs1454450050 | intron_variant                                                                                    |
| rs1454509768 | intron_variant,genic_upstream_transcript_variant                                                  |
| rs1454552203 | intron_variant                                                                                    |
| rs1454559850 | intron_variant,genic_upstream_transcript_variant                                                  |
| rs1454565678 | intron_variant                                                                                    |
| rs1454569952 | genic_downstream_transcript_variant,intron_variant                                                |
| rs1454592385 | intron_variant                                                                                    |
| rs1454605173 | intron_variant                                                                                    |
| rs1454611094 | intron_variant                                                                                    |
| rs1454634763 | intron_variant                                                                                    |
| rs1454652222 | intron_variant,genic_upstream_transcript_variant                                                  |
| rs1454689300 | intron_variant                                                                                    |
| rs1454696095 | intron_variant                                                                                    |
| rs1454700091 | intron_variant                                                                                    |

|              |                                                                                                                           |
|--------------|---------------------------------------------------------------------------------------------------------------------------|
| rs1454725828 | intron_variant                                                                                                            |
| rs1454726204 | intron_variant,genic_upstream_transcript_variant                                                                          |
| rs1454742119 | intron_variant                                                                                                            |
| rs1454746602 | intron_variant,genic_upstream_transcript_variant                                                                          |
| rs1454764056 | intron_variant,genic_upstream_transcript_variant                                                                          |
| rs1454778500 | intron_variant,genic_upstream_transcript_variant                                                                          |
| rs1454828524 | genic_downstream_transcript_variant,intron_variant                                                                        |
| rs1454854904 | intron_variant,genic_upstream_transcript_variant                                                                          |
| rs1454856933 | intron_variant,genic_upstream_transcript_variant,synonymous_variant,coding_sequence_variant,non_coding_transcript_variant |
| rs1454887572 | intron_variant                                                                                                            |
| rs1454902932 | intron_variant,genic_upstream_transcript_variant                                                                          |
| rs1454915019 | intron_variant,genic_upstream_transcript_variant                                                                          |
| rs1454916473 | intron_variant,genic_upstream_transcript_variant                                                                          |
| rs1455038932 | genic_downstream_transcript_variant,intron_variant                                                                        |
| rs1455054818 | intron_variant,genic_upstream_transcript_variant                                                                          |
| rs1455055677 | genic_downstream_transcript_variant,intron_variant                                                                        |
| rs1455072332 | intron_variant,genic_upstream_transcript_variant                                                                          |
| rs1455089355 | intron_variant                                                                                                            |
| rs1455092032 | intron_variant,genic_upstream_transcript_variant                                                                          |
| rs1455102575 | intron_variant,genic_upstream_transcript_variant                                                                          |
| rs1455148545 | genic_downstream_transcript_variant,intron_variant                                                                        |
| rs1455220918 | intron_variant                                                                                                            |
| rs1455335078 | intron_variant                                                                                                            |
| rs1455337200 | intron_variant,genic_upstream_transcript_variant                                                                          |
| rs1455342795 | intron_variant                                                                                                            |
| rs1455399445 | intron_variant,genic_upstream_transcript_variant                                                                          |
| rs1455412759 | intron_variant                                                                                                            |
| rs1455440121 | intron_variant                                                                                                            |
| rs1455475973 | genic_downstream_transcript_variant,intron_variant                                                                        |
| rs1455509087 | genic_downstream_transcript_variant,intron_variant                                                                        |
| rs1455527878 | coding_sequence_variant,synonymous_variant,non_coding_transcript_variant                                                  |
| rs1455541728 | intron_variant                                                                                                            |
| rs1455546970 | intron_variant,genic_upstream_transcript_variant                                                                          |
| rs1455577304 | intron_variant                                                                                                            |
| rs1455599443 | intron_variant                                                                                                            |
| rs1455609129 | intron_variant                                                                                                            |
| rs1455696653 | intron_variant                                                                                                            |
| rs1455716880 | intron_variant                                                                                                            |
| rs1455727329 | intron_variant,genic_upstream_transcript_variant                                                                          |
| rs1455728819 | intron_variant,genic_upstream_transcript_variant                                                                          |
| rs1455734334 | intron_variant                                                                                                            |
| rs1455751731 | intron_variant                                                                                                            |
| rs1455771100 | genic_downstream_transcript_variant,intron_variant                                                                        |
| rs1455829705 | intron_variant,genic_upstream_transcript_variant                                                                          |
| rs1455867541 | genic_downstream_transcript_variant,intron_variant                                                                        |
| rs1455899454 | intron_variant                                                                                                            |
| rs1455914162 | intron_variant                                                                                                            |
| rs1455962884 | intron_variant                                                                                                            |
| rs1456007207 | intron_variant,genic_upstream_transcript_variant                                                                          |
| rs1456010271 | intron_variant                                                                                                            |
| rs1456036205 | intron_variant                                                                                                            |
| rs1456075748 | intron_variant,genic_upstream_transcript_variant                                                                          |
| rs1456082939 | genic_downstream_transcript_variant,intron_variant                                                                        |
| rs1456120233 | intron_variant                                                                                                            |
| rs1456121494 | intron_variant                                                                                                            |
| rs1456188718 | intron_variant                                                                                                            |
| rs1456217214 | intron_variant                                                                                                            |
| rs1456240074 | intron_variant,genic_upstream_transcript_variant                                                                          |
| rs1456248194 | intron_variant                                                                                                            |
| rs1456332887 | intron_variant,genic_upstream_transcript_variant                                                                          |
| rs1456349482 | intron_variant                                                                                                            |
| rs1456379339 | intron_variant,genic_upstream_transcript_variant                                                                          |
| rs1456398392 | genic_downstream_transcript_variant,intron_variant                                                                        |
| rs1456415035 | intron_variant                                                                                                            |
| rs1456450139 | genic_downstream_transcript_variant,intron_variant                                                                        |
| rs1456451910 | intron_variant,genic_upstream_transcript_variant                                                                          |
| rs1456474931 | intron_variant,genic_upstream_transcript_variant                                                                          |
| rs1456502970 | genic_downstream_transcript_variant,intron_variant                                                                        |
| rs1456544879 | genic_downstream_transcript_variant,intron_variant                                                                        |
| rs1456591854 | intron_variant,upstream_transcript_variant,genic_upstream_transcript_variant                                              |
| rs1456593956 | intron_variant,genic_upstream_transcript_variant                                                                          |
| rs1456615404 | intron_variant,genic_upstream_transcript_variant                                                                          |
| rs1456633688 | genic_downstream_transcript_variant,intron_variant                                                                        |
| rs1456662778 | intron_variant,genic_upstream_transcript_variant                                                                          |

|              |                                                                                                   |
|--------------|---------------------------------------------------------------------------------------------------|
| rs1456668497 | intron_variant,genic_upstream_transcript_variant                                                  |
| rs1456677272 | intron_variant,genic_upstream_transcript_variant                                                  |
| rs1456699763 | intron_variant                                                                                    |
| rs1456761381 | intron_variant,2KB_upstream_variant,upstream_transcript_variant,genic_upstream_transcript_variant |
| rs1456765623 | intron_variant                                                                                    |
| rs1456776453 | intron_variant,2KB_upstream_variant,upstream_transcript_variant,genic_upstream_transcript_variant |
| rs1456788838 | genic_downstream_transcript_variant,intron_variant                                                |
| rs1456789058 | intron_variant,genic_upstream_transcript_variant                                                  |
| rs1456819862 | intron_variant,genic_upstream_transcript_variant                                                  |
| rs1456842279 | intron_variant,genic_upstream_transcript_variant                                                  |
| rs1456865507 | genic_downstream_transcript_variant,intron_variant,downstream_transcript_variant                  |
| rs1456880751 | genic_downstream_transcript_variant,intron_variant                                                |
| rs1456899150 | intron_variant                                                                                    |
| rs1456902764 | intron_variant,genic_upstream_transcript_variant                                                  |
| rs1456907776 | intron_variant,genic_upstream_transcript_variant                                                  |
| rs1456939127 | intron_variant                                                                                    |
| rs1456960633 | intron_variant,genic_upstream_transcript_variant                                                  |
| rs1456968649 | genic_downstream_transcript_variant,intron_variant                                                |
| rs1456977872 | intron_variant                                                                                    |
| rs1456978140 | genic_downstream_transcript_variant,intron_variant                                                |
| rs1456997400 | intron_variant,genic_upstream_transcript_variant                                                  |
| rs1457025042 | intron_variant                                                                                    |
| rs1457060964 | 500B_downstream_variant,downstream_transcript_variant                                             |
| rs1457066927 | intron_variant,genic_upstream_transcript_variant                                                  |
| rs1457111670 | genic_downstream_transcript_variant,intron_variant                                                |
| rs1457169800 | intron_variant                                                                                    |
| rs1457206771 | intron_variant                                                                                    |
| rs1457252451 | intron_variant,upstream_transcript_variant,genic_upstream_transcript_variant                      |
| rs1457279681 | intron_variant                                                                                    |
| rs1457324787 | intron_variant,genic_upstream_transcript_variant                                                  |
| rs1457348805 | genic_downstream_transcript_variant,intron_variant                                                |
| rs1457426432 | intron_variant                                                                                    |
| rs1457433423 | intron_variant                                                                                    |
| rs1457446217 | genic_downstream_transcript_variant,intron_variant                                                |
| rs1457473351 | intron_variant                                                                                    |
| rs1457500190 | intron_variant                                                                                    |
| rs1457523478 | intron_variant,genic_upstream_transcript_variant                                                  |
| rs1457526363 | intron_variant,2KB_upstream_variant,upstream_transcript_variant,genic_upstream_transcript_variant |
| rs1457531643 | intron_variant,genic_upstream_transcript_variant                                                  |
| rs1457534574 | intron_variant,upstream_transcript_variant,genic_upstream_transcript_variant                      |
| rs1457545983 | intron_variant,genic_upstream_transcript_variant                                                  |
| rs1457558684 | intron_variant,genic_upstream_transcript_variant                                                  |
| rs1457577974 | intron_variant                                                                                    |
| rs1457582738 | intron_variant,upstream_transcript_variant,genic_upstream_transcript_variant                      |
| rs1457604133 | intron_variant                                                                                    |
| rs1457629940 | intron_variant                                                                                    |
| rs1457650213 | genic_downstream_transcript_variant,intron_variant                                                |
| rs1457664022 | intron_variant,genic_upstream_transcript_variant                                                  |
| rs1457667010 | intron_variant                                                                                    |
| rs1457715246 | intron_variant                                                                                    |
| rs1457740665 | intron_variant                                                                                    |
| rs1457776664 | intron_variant                                                                                    |
| rs1457789894 | intron_variant                                                                                    |
| rs1457792033 | genic_downstream_transcript_variant,intron_variant                                                |
| rs1457836967 | genic_downstream_transcript_variant,intron_variant                                                |
| rs1457881364 | genic_downstream_transcript_variant,intron_variant                                                |
| rs1457889926 | genic_downstream_transcript_variant,intron_variant                                                |
| rs1457904308 | intron_variant                                                                                    |
| rs1457916654 | intron_variant,upstream_transcript_variant,genic_upstream_transcript_variant                      |
| rs1457936745 | intron_variant                                                                                    |
| rs1457960193 | intron_variant,genic_upstream_transcript_variant                                                  |
| rs1457965285 | genic_downstream_transcript_variant,intron_variant                                                |
| rs1457971276 | intron_variant                                                                                    |
| rs1458035670 | genic_downstream_transcript_variant,non_coding_transcript_variant,3_prime_UTR_variant             |
| rs1458061908 | genic_downstream_transcript_variant,intron_variant,downstream_transcript_variant                  |
| rs1458077342 | intron_variant,genic_upstream_transcript_variant                                                  |
| rs1458102755 | intron_variant,2KB_upstream_variant,upstream_transcript_variant,genic_upstream_transcript_variant |
| rs1458104635 | genic_downstream_transcript_variant,intron_variant                                                |
| rs1458106027 | intron_variant,genic_upstream_transcript_variant                                                  |
| rs1458190393 | intron_variant,genic_upstream_transcript_variant                                                  |
| rs1458191852 | intron_variant,genic_upstream_transcript_variant                                                  |
| rs1458218813 | genic_downstream_transcript_variant,intron_variant                                                |
| rs1458250645 | intron_variant,genic_upstream_transcript_variant                                                  |
| rs1458257166 | intron_variant                                                                                    |

|              |                                                                                                            |
|--------------|------------------------------------------------------------------------------------------------------------|
| rs1458278491 | genic_downstream_transcript_variant,intron_variant                                                         |
| rs1458299033 | intron_variant,genic_upstream_transcript_variant                                                           |
| rs1458326953 | intron_variant                                                                                             |
| rs1458354819 | intron_variant,genic_upstream_transcript_variant                                                           |
| rs1458425078 | intron_variant,genic_upstream_transcript_variant                                                           |
| rs1458442819 | intron_variant                                                                                             |
| rs1458459728 | intron_variant,genic_upstream_transcript_variant                                                           |
| rs1458491351 | intron_variant                                                                                             |
| rs1458548931 | intron_variant                                                                                             |
| rs1458596964 | genic_downstream_transcript_variant,intron_variant                                                         |
| rs1458620350 | intron_variant                                                                                             |
| rs1458650684 | intron_variant,genic_upstream_transcript_variant                                                           |
| rs1458672778 | intron_variant                                                                                             |
| rs1458682141 | intron_variant                                                                                             |
| rs1458720632 | intron_variant,genic_upstream_transcript_variant                                                           |
| rs1458739376 | intron_variant                                                                                             |
| rs1458759372 | genic_downstream_transcript_variant,intron_variant                                                         |
| rs1458854305 | intron_variant                                                                                             |
| rs1458860221 | intron_variant,upstream_transcript_variant,genic_upstream_transcript_variant                               |
| rs1458862165 | intron_variant,genic_upstream_transcript_variant                                                           |
| rs1459015617 | intron_variant                                                                                             |
| rs1459032065 | intron_variant                                                                                             |
| rs1459052591 | intron_variant                                                                                             |
| rs1459081145 | intron_variant,genic_upstream_transcript_variant                                                           |
| rs1459090140 | intron_variant                                                                                             |
| rs1459101565 | intron_variant,genic_upstream_transcript_variant                                                           |
| rs1459113154 | intron_variant                                                                                             |
| rs1459146190 | intron_variant,genic_upstream_transcript_variant                                                           |
| rs1459235229 | intron_variant,upstream_transcript_variant,genic_upstream_transcript_variant                               |
| rs1459249174 | 500B_downstream_variant,downstream_transcript_variant                                                      |
| rs1459262751 | intron_variant                                                                                             |
| rs1459288836 | genic_downstream_transcript_variant,intron_variant                                                         |
| rs1459310685 | intron_variant,genic_upstream_transcript_variant                                                           |
| rs1459318675 | intron_variant,genic_upstream_transcript_variant                                                           |
| rs1459348352 | intron_variant                                                                                             |
| rs1459351012 | intron_variant,upstream_transcript_variant,genic_upstream_transcript_variant                               |
| rs1459375512 | genic_downstream_transcript_variant,coding_sequence_variant,non_coding_transcript_variant,missense_variant |
| rs1459408373 | intron_variant                                                                                             |
| rs1459409168 | intron_variant                                                                                             |
| rs1459425630 | genic_downstream_transcript_variant,intron_variant                                                         |
| rs1459428771 | intron_variant                                                                                             |
| rs1459438681 | intron_variant,genic_upstream_transcript_variant                                                           |
| rs1459452972 | intron_variant,genic_upstream_transcript_variant                                                           |
| rs1459492041 | intron_variant,genic_upstream_transcript_variant                                                           |
| rs1459500207 | intron_variant,genic_upstream_transcript_variant                                                           |
| rs1459548991 | intron_variant                                                                                             |
| rs1459576718 | intron_variant,genic_upstream_transcript_variant                                                           |
| rs1459642168 | intron_variant,genic_upstream_transcript_variant                                                           |
| rs1459679818 | intron_variant,genic_upstream_transcript_variant                                                           |
| rs1459690936 | intron_variant                                                                                             |
| rs1459696201 | intron_variant,genic_upstream_transcript_variant                                                           |
| rs1459703001 | intron_variant,genic_upstream_transcript_variant                                                           |
| rs1459709973 | intron_variant                                                                                             |
| rs1459727668 | intron_variant,genic_upstream_transcript_variant                                                           |
| rs1459745698 | intron_variant,genic_upstream_transcript_variant                                                           |
| rs1459801507 | intron_variant,genic_upstream_transcript_variant                                                           |
| rs1459864578 | intron_variant,genic_downstream_transcript_variant                                                         |
| rs1459867959 | intron_variant,genic_upstream_transcript_variant                                                           |
| rs1459868654 | intron_variant,genic_upstream_transcript_variant                                                           |
| rs1459878786 | intron_variant                                                                                             |
| rs1459900088 | intron_variant                                                                                             |
| rs1459906012 | intron_variant,genic_upstream_transcript_variant                                                           |
| rs1459908279 | intron_variant,genic_downstream_transcript_variant                                                         |
| rs1459925605 | intron_variant,genic_downstream_transcript_variant                                                         |
| rs1459947806 | intron_variant,genic_downstream_transcript_variant                                                         |
| rs1459961926 | intron_variant,genic_upstream_transcript_variant                                                           |
| rs1459974065 | intron_variant                                                                                             |
| rs1460020143 | intron_variant,genic_upstream_transcript_variant                                                           |
| rs1460044267 | intron_variant                                                                                             |
| rs1460047648 | intron_variant,genic_downstream_transcript_variant                                                         |
| rs1460084890 | intron_variant                                                                                             |
| rs1460098943 | intron_variant                                                                                             |
| rs1460172025 | intron_variant                                                                                             |
| rs1460222627 | intron_variant,genic_downstream_transcript_variant                                                         |

|              |                                                                                                                           |
|--------------|---------------------------------------------------------------------------------------------------------------------------|
| rs1460245148 | intron_variant,genic_upstream_transcript_variant                                                                          |
| rs1460270870 | intron_variant                                                                                                            |
| rs1460297952 | coding_sequence_variant,intron_variant,missense_variant                                                                   |
| rs1460325676 | intron_variant,genic_downstream_transcript_variant                                                                        |
| rs1460328831 | intron_variant,genic_upstream_transcript_variant                                                                          |
| rs1460387627 | intron_variant,genic_upstream_transcript_variant                                                                          |
| rs1460393960 | intron_variant,genic_upstream_transcript_variant                                                                          |
| rs1460414489 | intron_variant                                                                                                            |
| rs1460434937 | intron_variant,upstream_transcript_variant,genic_upstream_transcript_variant                                              |
| rs1460441653 | intron_variant                                                                                                            |
| rs1460459693 | intron_variant                                                                                                            |
| rs1460546570 | intron_variant,genic_downstream_transcript_variant                                                                        |
| rs1460602287 | intron_variant,genic_upstream_transcript_variant                                                                          |
| rs1460606924 | intron_variant,genic_upstream_transcript_variant                                                                          |
| rs1460639979 | intron_variant,genic_upstream_transcript_variant                                                                          |
| rs1460661862 | intron_variant                                                                                                            |
| rs1460689739 | intron_variant                                                                                                            |
| rs1460720526 | intron_variant,genic_upstream_transcript_variant                                                                          |
| rs1460733918 | intron_variant                                                                                                            |
| rs1460750267 | intron_variant                                                                                                            |
| rs1460770759 | intron_variant,genic_upstream_transcript_variant                                                                          |
| rs1460815408 | intron_variant,genic_downstream_transcript_variant                                                                        |
| rs1460864330 | intron_variant,genic_upstream_transcript_variant                                                                          |
| rs1460932389 | intron_variant                                                                                                            |
| rs1460950810 | intron_variant,genic_upstream_transcript_variant                                                                          |
| rs1460985634 | intron_variant                                                                                                            |
| rs1461000972 | intron_variant                                                                                                            |
| rs1461026483 | intron_variant                                                                                                            |
| rs1461034570 | intron_variant                                                                                                            |
| rs1461051123 | intron_variant,genic_upstream_transcript_variant                                                                          |
| rs1461079558 | intron_variant                                                                                                            |
| rs1461086304 | intron_variant,genic_upstream_transcript_variant                                                                          |
| rs1461130710 | intron_variant,upstream_transcript_variant,genic_upstream_transcript_variant                                              |
| rs1461137727 | 3_prime_UTR_variant,genic_downstream_transcript_variant,non_coding_transcript_variant                                     |
| rs1461169405 | intron_variant,upstream_transcript_variant,genic_upstream_transcript_variant                                              |
| rs1461311002 | intron_variant,genic_upstream_transcript_variant                                                                          |
| rs1461326800 | intron_variant,genic_upstream_transcript_variant                                                                          |
| rs1461342072 | intron_variant,genic_upstream_transcript_variant                                                                          |
| rs1461351151 | intron_variant,genic_upstream_transcript_variant                                                                          |
| rs1461386436 | intron_variant,genic_downstream_transcript_variant                                                                        |
| rs1461414732 | intron_variant,genic_upstream_transcript_variant                                                                          |
| rs1461424951 | intron_variant,genic_upstream_transcript_variant                                                                          |
| rs1461430743 | intron_variant,genic_downstream_transcript_variant                                                                        |
| rs1461455526 | non_coding_transcript_variant,intron_variant,genic_upstream_transcript_variant,synonymous_variant,coding_sequence_variant |
| rs1461473738 | intron_variant,genic_upstream_transcript_variant                                                                          |
| rs1461508181 | intron_variant,genic_downstream_transcript_variant                                                                        |
| rs1461530441 | intron_variant                                                                                                            |
| rs1461541407 | intron_variant,genic_upstream_transcript_variant                                                                          |
| rs1461605425 | intron_variant,genic_upstream_transcript_variant                                                                          |
| rs1461621226 | intron_variant,genic_downstream_transcript_variant                                                                        |
| rs1461639647 | intron_variant                                                                                                            |
| rs1461653958 | intron_variant,genic_upstream_transcript_variant                                                                          |
| rs1461693818 | intron_variant,genic_upstream_transcript_variant                                                                          |
| rs1461699564 | intron_variant,2KB_upstream_variant,upstream_transcript_variant,genic_upstream_transcript_variant                         |
| rs1461726778 | intron_variant,genic_upstream_transcript_variant                                                                          |
| rs1461791962 | non_coding_transcript_variant,intron_variant,genic_upstream_transcript_variant,synonymous_variant,coding_sequence_variant |
| rs1461800856 | intron_variant,genic_upstream_transcript_variant                                                                          |
| rs1461833225 | intron_variant                                                                                                            |
| rs1461839589 | intron_variant,genic_upstream_transcript_variant                                                                          |
| rs1461873101 | intron_variant,genic_upstream_transcript_variant                                                                          |
| rs1461888701 | intron_variant,genic_upstream_transcript_variant                                                                          |
| rs1461889338 | intron_variant                                                                                                            |
| rs1461891295 | intron_variant                                                                                                            |
| rs1461919388 | 5_prime_UTR_variant,intron_variant,upstream_transcript_variant,genic_upstream_transcript_variant                          |
| rs1461941704 | intron_variant,genic_upstream_transcript_variant                                                                          |
| rs1461948240 | intron_variant,genic_upstream_transcript_variant                                                                          |
| rs1461952988 | intron_variant,upstream_transcript_variant,genic_upstream_transcript_variant                                              |
| rs1461990383 | intron_variant                                                                                                            |
| rs1462002255 | intron_variant,genic_upstream_transcript_variant                                                                          |
| rs1462010873 | intron_variant,genic_downstream_transcript_variant                                                                        |
| rs1462042758 | 3_prime_UTR_variant,genic_downstream_transcript_variant,non_coding_transcript_variant                                     |
| rs1462107934 | intron_variant                                                                                                            |
| rs1462131430 | intron_variant                                                                                                            |
| rs1462170996 | intron_variant                                                                                                            |

|              |                                                                                                   |
|--------------|---------------------------------------------------------------------------------------------------|
| rs1462216470 | intron_variant                                                                                    |
| rs1462227665 | intron_variant,genic_upstream_transcript_variant                                                  |
| rs1462261092 | intron_variant                                                                                    |
| rs1462274166 | intron_variant,genic_downstream_transcript_variant                                                |
| rs1462275481 | 2KB_upstream_variant,intron_variant,upstream_transcript_variant,genic_upstream_transcript_variant |
| rs1462280421 | 500B_downstream_variant,downstream_transcript_variant                                             |
| rs1462304982 | intron_variant                                                                                    |
| rs1462324155 | intron_variant,genic_upstream_transcript_variant                                                  |
| rs1462326115 | intron_variant,genic_downstream_transcript_variant                                                |
| rs1462364783 | intron_variant                                                                                    |
| rs1462370046 | intron_variant,genic_downstream_transcript_variant                                                |
| rs1462389004 | intron_variant                                                                                    |
| rs1462419939 | intron_variant,genic_upstream_transcript_variant                                                  |
| rs1462442337 | intron_variant,genic_upstream_transcript_variant                                                  |
| rs1462451118 | intron_variant                                                                                    |
| rs1462464114 | intron_variant,genic_upstream_transcript_variant                                                  |
| rs1462479969 | intron_variant,upstream_transcript_variant,genic_upstream_transcript_variant                      |
| rs1462523690 | intron_variant,genic_downstream_transcript_variant                                                |
| rs1462531956 | intron_variant,genic_downstream_transcript_variant                                                |
| rs1462563802 | intron_variant                                                                                    |
| rs1462571988 | intron_variant,genic_upstream_transcript_variant                                                  |
| rs1462572854 | intron_variant,genic_downstream_transcript_variant                                                |
| rs1462595458 | intron_variant,genic_downstream_transcript_variant                                                |
| rs1462596481 | intron_variant,genic_upstream_transcript_variant                                                  |
| rs1462668736 | intron_variant                                                                                    |
| rs1462679646 | intron_variant,genic_downstream_transcript_variant                                                |
| rs1462682247 | intron_variant                                                                                    |
| rs1462685299 | intron_variant,genic_upstream_transcript_variant                                                  |
| rs1462747176 | intron_variant,genic_downstream_transcript_variant                                                |
| rs1462782163 | intron_variant,genic_upstream_transcript_variant                                                  |
| rs1462827498 | intron_variant                                                                                    |
| rs1462846133 | intron_variant,genic_downstream_transcript_variant                                                |
| rs1462872866 | intron_variant,genic_upstream_transcript_variant                                                  |
| rs1462878254 | intron_variant,genic_upstream_transcript_variant                                                  |
| rs1462908828 | intron_variant,genic_upstream_transcript_variant                                                  |
| rs1462915645 | intron_variant,genic_upstream_transcript_variant                                                  |
| rs1462926492 | intron_variant,genic_upstream_transcript_variant                                                  |
| rs1462979460 | intron_variant,genic_upstream_transcript_variant                                                  |
| rs1462983013 | intron_variant,genic_upstream_transcript_variant                                                  |
| rs1463006655 | intron_variant                                                                                    |
| rs1463061458 | intron_variant,genic_upstream_transcript_variant                                                  |
| rs1463103391 | intron_variant                                                                                    |
| rs1463107773 | intron_variant                                                                                    |
| rs1463110673 | intron_variant                                                                                    |
| rs1463156721 | intron_variant,genic_upstream_transcript_variant                                                  |
| rs1463163813 | intron_variant,genic_upstream_transcript_variant                                                  |
| rs1463170671 | intron_variant,genic_upstream_transcript_variant                                                  |
| rs1463189325 | intron_variant,genic_downstream_transcript_variant                                                |
| rs1463192221 | intron_variant,genic_downstream_transcript_variant                                                |
| rs1463304790 | intron_variant                                                                                    |
| rs1463307187 | intron_variant,genic_upstream_transcript_variant                                                  |
| rs1463326088 | intron_variant,genic_upstream_transcript_variant                                                  |
| rs1463365000 | intron_variant,genic_upstream_transcript_variant                                                  |
| rs1463385341 | intron_variant,genic_upstream_transcript_variant                                                  |
| rs1463388512 | intron_variant,genic_downstream_transcript_variant                                                |
| rs1463408020 | intron_variant,genic_upstream_transcript_variant                                                  |
| rs1463417292 | intron_variant                                                                                    |
| rs1463454709 | intron_variant,genic_upstream_transcript_variant                                                  |
| rs1463467244 | intron_variant                                                                                    |
| rs1463556588 | intron_variant                                                                                    |
| rs1463686070 | intron_variant                                                                                    |
| rs1463706195 | intron_variant                                                                                    |
| rs1463710285 | intron_variant                                                                                    |
| rs1463746323 | intron_variant                                                                                    |
| rs1463785268 | intron_variant,genic_upstream_transcript_variant                                                  |
| rs1463803326 | intron_variant,upstream_transcript_variant,genic_upstream_transcript_variant                      |
| rs1463831768 | intron_variant                                                                                    |
| rs1463832071 | intron_variant,genic_upstream_transcript_variant                                                  |
| rs1463842202 | intron_variant,genic_upstream_transcript_variant                                                  |
| rs1463844879 | intron_variant,genic_downstream_transcript_variant                                                |
| rs1463875922 | intron_variant                                                                                    |
| rs1463895850 | intron_variant,genic_upstream_transcript_variant                                                  |
| rs1463969183 | intron_variant                                                                                    |
| rs1463971718 | intron_variant,genic_upstream_transcript_variant                                                  |

|              |                                                                                                            |
|--------------|------------------------------------------------------------------------------------------------------------|
| rs1464006797 | intron_variant,genic_upstream_transcript_variant                                                           |
| rs1464044444 | intron_variant,genic_upstream_transcript_variant                                                           |
| rs1464115678 | intron_variant                                                                                             |
| rs1464129513 | intron_variant,genic_upstream_transcript_variant                                                           |
| rs1464243770 | intron_variant,genic_downstream_transcript_variant                                                         |
| rs1464294611 | 2KB_upstream_variant,intron_variant,upstream_transcript_variant,genic_upstream_transcript_variant          |
| rs1464298377 | intron_variant,genic_downstream_transcript_variant                                                         |
| rs1464316950 | coding_sequence_variant,genic_downstream_transcript_variant,missense_variant,non_coding_transcript_variant |
| rs1464364125 | intron_variant                                                                                             |
| rs1464366727 | intron_variant,genic_downstream_transcript_variant                                                         |
| rs1464367699 | intron_variant,2KB_upstream_variant,upstream_transcript_variant,genic_upstream_transcript_variant          |
| rs1464377766 | intron_variant,genic_upstream_transcript_variant                                                           |
| rs1464412119 | intron_variant                                                                                             |
| rs1464480155 | intron_variant,genic_upstream_transcript_variant                                                           |
| rs1464494783 | intron_variant,genic_upstream_transcript_variant                                                           |
| rs1464512782 | intron_variant                                                                                             |
| rs1464528009 | intron_variant,genic_upstream_transcript_variant                                                           |
| rs1464539654 | intron_variant                                                                                             |
| rs1464599991 | 500B_downstream_variant,downstream_transcript_variant                                                      |
| rs1464675965 | intron_variant,upstream_transcript_variant,genic_upstream_transcript_variant                               |
| rs1464710160 | intron_variant                                                                                             |
| rs1464710536 | intron_variant,genic_downstream_transcript_variant                                                         |
| rs1464741838 | intron_variant,genic_upstream_transcript_variant                                                           |
| rs1464774656 | intron_variant,upstream_transcript_variant,genic_upstream_transcript_variant                               |
| rs1464794785 | intron_variant,genic_upstream_transcript_variant                                                           |
| rs1464806790 | intron_variant,genic_downstream_transcript_variant                                                         |
| rs1464813176 | intron_variant,genic_upstream_transcript_variant                                                           |
| rs1464841967 | intron_variant,genic_upstream_transcript_variant                                                           |
| rs1464883835 | intron_variant                                                                                             |
| rs1464902800 | intron_variant,genic_downstream_transcript_variant                                                         |
| rs1464905123 | intron_variant                                                                                             |
| rs1464940213 | intron_variant,genic_downstream_transcript_variant                                                         |
| rs1464940411 | intron_variant,genic_upstream_transcript_variant                                                           |
| rs1464971320 | intron_variant,upstream_transcript_variant,genic_upstream_transcript_variant                               |
| rs1464974627 | intron_variant                                                                                             |
| rs1465023725 | intron_variant,genic_upstream_transcript_variant                                                           |
| rs1465027918 | intron_variant,genic_upstream_transcript_variant                                                           |
| rs1465039698 | intron_variant,2KB_upstream_variant,upstream_transcript_variant,genic_upstream_transcript_variant          |
| rs1465041382 | intron_variant,genic_downstream_transcript_variant                                                         |
| rs1465075389 | 2KB_upstream_variant,intron_variant,upstream_transcript_variant,genic_upstream_transcript_variant          |
| rs1465075762 | intron_variant,genic_upstream_transcript_variant                                                           |
| rs1465086873 | intron_variant,2KB_upstream_variant,upstream_transcript_variant,genic_upstream_transcript_variant          |
| rs1465154711 | intron_variant,genic_upstream_transcript_variant                                                           |
| rs1465169162 | intron_variant,genic_downstream_transcript_variant                                                         |
| rs1465205432 | intron_variant,genic_downstream_transcript_variant                                                         |
| rs1465205467 | intron_variant                                                                                             |
| rs1465226832 | intron_variant,genic_downstream_transcript_variant                                                         |
| rs1465257935 | intron_variant                                                                                             |
| rs1465265706 | intron_variant,genic_downstream_transcript_variant                                                         |
| rs1465274653 | intron_variant,genic_downstream_transcript_variant                                                         |
| rs1465288758 | intron_variant,genic_upstream_transcript_variant                                                           |
| rs1465343954 | intron_variant,genic_upstream_transcript_variant                                                           |
| rs1465362793 | intron_variant,genic_upstream_transcript_variant                                                           |
| rs1465396774 | intron_variant,genic_upstream_transcript_variant                                                           |
| rs1465400690 | intron_variant,genic_upstream_transcript_variant                                                           |
| rs1465422519 | intron_variant                                                                                             |
| rs1465439333 | intron_variant                                                                                             |
| rs1465444752 | intron_variant,genic_upstream_transcript_variant                                                           |
| rs1465488249 | 5_prime_UTR_variant,intron_variant                                                                         |
| rs146556948  | intron_variant,genic_downstream_transcript_variant                                                         |
| rs1465558657 | intron_variant,genic_upstream_transcript_variant                                                           |
| rs1465558921 | intron_variant,genic_upstream_transcript_variant                                                           |
| rs1465589330 | intron_variant,genic_downstream_transcript_variant                                                         |
| rs1465616849 | intron_variant                                                                                             |
| rs1465639408 | 2KB_upstream_variant,intron_variant,upstream_transcript_variant,genic_upstream_transcript_variant          |
| rs1465694041 | intron_variant,genic_upstream_transcript_variant                                                           |
| rs1465710400 | intron_variant,genic_upstream_transcript_variant                                                           |
| rs1465772712 | coding_sequence_variant,intron_variant,missense_variant                                                    |
| rs1465774539 | intron_variant,genic_downstream_transcript_variant                                                         |
| rs1465783185 | intron_variant                                                                                             |
| rs1465840199 | intron_variant,genic_upstream_transcript_variant                                                           |
| rs1465914503 | intron_variant,genic_downstream_transcript_variant                                                         |
| rs1465922987 | intron_variant                                                                                             |
| rs1465955052 | intron_variant,genic_downstream_transcript_variant                                                         |

|              |                                                                                                            |
|--------------|------------------------------------------------------------------------------------------------------------|
| rs1465972466 | intron_variant                                                                                             |
| rs1466016328 | intron_variant                                                                                             |
| rs1466067583 | intron_variant,upstream_transcript_variant,genic_upstream_transcript_variant                               |
| rs1466079200 | 3_prime_UTR_variant,genic_downstream_transcript_variant,non_coding_transcript_variant                      |
| rs1466109590 | intron_variant                                                                                             |
| rs1466119538 | intron_variant,genic_upstream_transcript_variant                                                           |
| rs1466141075 | intron_variant,genic_downstream_transcript_variant                                                         |
| rs1466155160 | intron_variant,genic_upstream_transcript_variant                                                           |
| rs1466176468 | intron_variant,genic_downstream_transcript_variant                                                         |
| rs1466185958 | intron_variant                                                                                             |
| rs1466203731 | intron_variant,genic_upstream_transcript_variant                                                           |
| rs1466206092 | intron_variant,genic_upstream_transcript_variant                                                           |
| rs1466220589 | intron_variant,genic_upstream_transcript_variant                                                           |
| rs1466239143 | intron_variant                                                                                             |
| rs1466243339 | intron_variant                                                                                             |
| rs1466259366 | intron_variant,genic_downstream_transcript_variant                                                         |
| rs1466280159 | intron_variant,genic_downstream_transcript_variant                                                         |
| rs1466292233 | intron_variant,genic_upstream_transcript_variant                                                           |
| rs1466329205 | intron_variant,upstream_transcript_variant,genic_upstream_transcript_variant                               |
| rs1466330032 | intron_variant,genic_upstream_transcript_variant                                                           |
| rs1466380514 | intron_variant                                                                                             |
| rs1466390869 | intron_variant                                                                                             |
| rs1466407812 | intron_variant,genic_upstream_transcript_variant                                                           |
| rs1466427644 | intron_variant,genic_upstream_transcript_variant                                                           |
| rs1466473303 | intron_variant                                                                                             |
| rs1466501881 | intron_variant,genic_upstream_transcript_variant                                                           |
| rs1466561661 | intron_variant                                                                                             |
| rs1466617948 | intron_variant,genic_downstream_transcript_variant                                                         |
| rs1466644366 | intron_variant,genic_upstream_transcript_variant                                                           |
| rs1466653458 | intron_variant                                                                                             |
| rs1466655581 | intron_variant                                                                                             |
| rs1466661428 | intron_variant,genic_upstream_transcript_variant                                                           |
| rs1466665259 | intron_variant,genic_downstream_transcript_variant                                                         |
| rs1466711316 | intron_variant,genic_downstream_transcript_variant                                                         |
| rs1466745130 | intron_variant,genic_downstream_transcript_variant                                                         |
| rs1466796044 | intron_variant,genic_upstream_transcript_variant                                                           |
| rs1466797520 | intron_variant,genic_downstream_transcript_variant                                                         |
| rs1466835849 | intron_variant,genic_downstream_transcript_variant                                                         |
| rs1466838059 | intron_variant,genic_upstream_transcript_variant                                                           |
| rs1466851761 | intron_variant                                                                                             |
| rs1466861999 | intron_variant,genic_downstream_transcript_variant                                                         |
| rs1466876676 | intron_variant,genic_downstream_transcript_variant                                                         |
| rs1466900141 | intron_variant                                                                                             |
| rs1466908355 | intron_variant                                                                                             |
| rs1466920538 | intron_variant,genic_upstream_transcript_variant                                                           |
| rs1466954854 | intron_variant                                                                                             |
| rs1466975132 | coding_sequence_variant,genic_downstream_transcript_variant,missense_variant,non_coding_transcript_variant |
| rs1466981738 | intron_variant,genic_upstream_transcript_variant                                                           |
| rs1466990384 | intron_variant,genic_upstream_transcript_variant                                                           |
| rs1467034893 | intron_variant                                                                                             |
| rs1467080418 | intron_variant                                                                                             |
| rs1467122527 | intron_variant,genic_upstream_transcript_variant                                                           |
| rs1467148213 | intron_variant                                                                                             |
| rs1467182961 | intron_variant,genic_downstream_transcript_variant                                                         |
| rs1467201832 | intron_variant                                                                                             |
| rs1467232376 | intron_variant,genic_upstream_transcript_variant                                                           |
| rs1467257264 | intron_variant,genic_downstream_transcript_variant                                                         |
| rs1467270255 | intron_variant,genic_upstream_transcript_variant                                                           |
| rs1467285006 | intron_variant,genic_upstream_transcript_variant                                                           |
| rs1467363280 | intron_variant                                                                                             |
| rs1467378333 | intron_variant,genic_upstream_transcript_variant                                                           |
| rs1467386450 | intron_variant,genic_downstream_transcript_variant                                                         |
| rs1467390719 | intron_variant                                                                                             |
| rs1467400378 | intron_variant                                                                                             |
| rs1467450377 | intron_variant                                                                                             |
| rs1467473539 | 2KB_upstream_variant,intron_variant,upstream_transcript_variant,genic_upstream_transcript_variant          |
| rs1467502349 | 3_prime_UTR_variant,genic_downstream_transcript_variant,non_coding_transcript_variant                      |
| rs1467558620 | intron_variant,genic_upstream_transcript_variant                                                           |
| rs1467580409 | intron_variant                                                                                             |
| rs1467591850 | intron_variant                                                                                             |
| rs1467641584 | intron_variant,genic_upstream_transcript_variant                                                           |
| rs1467685481 | intron_variant                                                                                             |
| rs1467708351 | intron_variant                                                                                             |
| rs1467747056 | intron_variant                                                                                             |

|              |                                                                                                                         |
|--------------|-------------------------------------------------------------------------------------------------------------------------|
| rs1467752811 | 2KB_upstream_variant,intron_variant,upstream_transcript_variant,genic_upstream_transcript_variant                       |
| rs1467770793 | intron_variant,genic_upstream_transcript_variant                                                                        |
| rs1467807406 | intron_variant                                                                                                          |
| rs1467841989 | intron_variant,genic_downstream_transcript_variant                                                                      |
| rs1467905809 | intron_variant,genic_upstream_transcript_variant                                                                        |
| rs1467908146 | intron_variant                                                                                                          |
| rs1467925436 | intron_variant,genic_upstream_transcript_variant                                                                        |
| rs1467932717 | intron_variant,genic_upstream_transcript_variant                                                                        |
| rs1467947805 | intron_variant,genic_upstream_transcript_variant                                                                        |
| rs1467970764 | intron_variant                                                                                                          |
| rs1467993050 | intron_variant,genic_upstream_transcript_variant                                                                        |
| rs1468013917 | intron_variant                                                                                                          |
| rs1468117649 | intron_variant,genic_upstream_transcript_variant                                                                        |
| rs1468122493 | intron_variant,genic_upstream_transcript_variant                                                                        |
| rs1468142470 | intron_variant,genic_downstream_transcript_variant                                                                      |
| rs1468150901 | intron_variant                                                                                                          |
| rs1468181151 | intron_variant,genic_upstream_transcript_variant                                                                        |
| rs1468218545 | intron_variant                                                                                                          |
| rs1468238923 | intron_variant,genic_upstream_transcript_variant                                                                        |
| rs1468282623 | intron_variant,genic_downstream_transcript_variant                                                                      |
| rs1468288017 | intron_variant,genic_upstream_transcript_variant                                                                        |
| rs1468308844 | intron_variant                                                                                                          |
| rs1468318098 | intron_variant,genic_upstream_transcript_variant                                                                        |
| rs1468397049 | intron_variant                                                                                                          |
| rs1468407496 | intron_variant,genic_upstream_transcript_variant                                                                        |
| rs1468459468 | non_coding_transcript_variant,intron_variant,genic_upstream_transcript_variant,missense_variant,coding_sequence_variant |
| rs1468465677 | intron_variant,genic_upstream_transcript_variant                                                                        |
| rs1468466503 | intron_variant,genic_upstream_transcript_variant                                                                        |
| rs1468580382 | intron_variant,upstream_transcript_variant,genic_upstream_transcript_variant                                            |
| rs1468619955 | intron_variant,genic_downstream_transcript_variant                                                                      |
| rs1468629302 | intron_variant,genic_upstream_transcript_variant                                                                        |
| rs1468629590 | intron_variant,genic_upstream_transcript_variant                                                                        |
| rs1468646080 | intron_variant,genic_downstream_transcript_variant                                                                      |
| rs1468670132 | intron_variant                                                                                                          |
| rs1468675612 | intron_variant,genic_upstream_transcript_variant                                                                        |
| rs1468694351 | intron_variant,genic_upstream_transcript_variant                                                                        |
| rs1468750037 | intron_variant,genic_upstream_transcript_variant                                                                        |
| rs1468761215 | 500B_downstream_variant,downstream_transcript_variant                                                                   |
| rs1468784627 | intron_variant,genic_downstream_transcript_variant                                                                      |
| rs1468842953 | intron_variant,genic_upstream_transcript_variant                                                                        |
| rs1468858960 | intron_variant,genic_downstream_transcript_variant                                                                      |
| rs1468883069 | intron_variant,genic_downstream_transcript_variant                                                                      |
| rs1468900124 | intron_variant,genic_upstream_transcript_variant                                                                        |
| rs1468907294 | intron_variant,genic_downstream_transcript_variant                                                                      |
| rs1468908651 | intron_variant,genic_upstream_transcript_variant                                                                        |
| rs1468922880 | intron_variant,genic_downstream_transcript_variant                                                                      |
| rs1468927264 | intron_variant                                                                                                          |
| rs1468932446 | intron_variant,genic_upstream_transcript_variant                                                                        |
| rs1468969943 | intron_variant,genic_upstream_transcript_variant                                                                        |
| rs1468997280 | intron_variant,genic_upstream_transcript_variant                                                                        |
| rs1469017841 | intron_variant,genic_downstream_transcript_variant                                                                      |
| rs1469053155 | intron_variant,genic_upstream_transcript_variant                                                                        |
| rs1469085272 | intron_variant,genic_upstream_transcript_variant                                                                        |
| rs1469114061 | intron_variant                                                                                                          |
| rs1469137149 | intron_variant                                                                                                          |
| rs1469145170 | intron_variant,genic_upstream_transcript_variant                                                                        |
| rs1469157034 | intron_variant,genic_upstream_transcript_variant                                                                        |
| rs1469206152 | intron_variant                                                                                                          |
| rs1469240995 | intron_variant,genic_downstream_transcript_variant                                                                      |
| rs1469256390 | intron_variant,genic_upstream_transcript_variant                                                                        |
| rs1469268827 | intron_variant,genic_upstream_transcript_variant                                                                        |
| rs1469296848 | intron_variant,genic_upstream_transcript_variant                                                                        |
| rs1469352267 | intron_variant                                                                                                          |
| rs1469375833 | intron_variant                                                                                                          |
| rs1469412433 | intron_variant,genic_upstream_transcript_variant                                                                        |
| rs1469424373 | intron_variant                                                                                                          |
| rs1469436690 | 3_prime_UTR_variant,genic_downstream_transcript_variant,non_coding_transcript_variant                                   |
| rs1469467557 | intron_variant,genic_upstream_transcript_variant                                                                        |
| rs1469473186 | intron_variant,genic_upstream_transcript_variant                                                                        |
| rs1469495263 | intron_variant,genic_upstream_transcript_variant                                                                        |
| rs1469501265 | intron_variant,genic_downstream_transcript_variant                                                                      |
| rs1469502447 | intron_variant,genic_upstream_transcript_variant                                                                        |
| rs1469533408 | intron_variant                                                                                                          |
| rs1469574734 | intron_variant,genic_upstream_transcript_variant                                                                        |

|              |                                                                                                   |
|--------------|---------------------------------------------------------------------------------------------------|
| rs1469589161 | intron_variant                                                                                    |
| rs1469699400 | intron_variant                                                                                    |
| rs1469731299 | intron_variant                                                                                    |
| rs1469731457 | intron_variant                                                                                    |
| rs1469731536 | intron_variant,genic_upstream_transcript_variant                                                  |
| rs1469799175 | intron_variant,genic_downstream_transcript_variant                                                |
| rs1469858336 | intron_variant                                                                                    |
| rs1469980580 | intron_variant                                                                                    |
| rs1469985468 | intron_variant,genic_upstream_transcript_variant                                                  |
| rs1470052672 | intron_variant                                                                                    |
| rs1470068059 | intron_variant,genic_downstream_transcript_variant                                                |
| rs1470092273 | intron_variant,genic_downstream_transcript_variant                                                |
| rs1470104314 | intron_variant                                                                                    |
| rs1470120029 | intron_variant,genic_upstream_transcript_variant                                                  |
| rs1470135868 | intron_variant,genic_downstream_transcript_variant                                                |
| rs1470170471 | intron_variant,genic_upstream_transcript_variant                                                  |
| rs1470176691 | 2KB_upstream_variant,intron_variant,upstream_transcript_variant,genic_upstream_transcript_variant |
| rs1470219848 | intron_variant,genic_downstream_transcript_variant                                                |
| rs1470253374 | intron_variant,genic_downstream_transcript_variant                                                |
| rs1470263389 | intron_variant,genic_upstream_transcript_variant                                                  |
| rs1470295493 | intron_variant,genic_upstream_transcript_variant                                                  |
| rs1470300650 | intron_variant,genic_downstream_transcript_variant                                                |
| rs1470352352 | intron_variant                                                                                    |
| rs1470422251 | intron_variant,genic_downstream_transcript_variant                                                |
| rs1470428804 | intron_variant,genic_upstream_transcript_variant                                                  |
| rs1470441125 | intron_variant,genic_downstream_transcript_variant                                                |
| rs1470450401 | intron_variant,genic_downstream_transcript_variant                                                |
| rs1470531889 | intron_variant,genic_upstream_transcript_variant                                                  |
| rs1470547247 | intron_variant                                                                                    |
| rs1470549606 | intron_variant                                                                                    |
| rs1470581064 | intron_variant                                                                                    |
| rs1470586005 | intron_variant,genic_upstream_transcript_variant                                                  |
| rs1470609134 | intron_variant,genic_upstream_transcript_variant                                                  |
| rs1470615388 | intron_variant,genic_upstream_transcript_variant                                                  |
| rs1470617695 | intron_variant,genic_upstream_transcript_variant                                                  |
| rs1470727099 | intron_variant                                                                                    |
| rs1470738104 | intron_variant                                                                                    |
| rs1470742926 | intron_variant                                                                                    |
| rs1470763390 | 5_prime_UTR_variant,intron_variant,upstream_transcript_variant,genic_upstream_transcript_variant  |
| rs1470774539 | intron_variant                                                                                    |
| rs1470792435 | intron_variant,genic_downstream_transcript_variant                                                |
| rs1470843083 | intron_variant,upstream_transcript_variant,genic_upstream_transcript_variant                      |
| rs1470854234 | intron_variant                                                                                    |
| rs1470868620 | intron_variant,genic_downstream_transcript_variant                                                |
| rs1470875305 | intron_variant                                                                                    |
| rs1470883300 | intron_variant                                                                                    |
| rs1470927368 | intron_variant                                                                                    |
| rs1470938144 | intron_variant                                                                                    |
| rs1470949600 | intron_variant,genic_upstream_transcript_variant                                                  |
| rs1470951861 | intron_variant                                                                                    |
| rs1470998796 | intron_variant,genic_upstream_transcript_variant                                                  |
| rs1471017193 | intron_variant,upstream_transcript_variant,genic_upstream_transcript_variant                      |
| rs1471027579 | intron_variant,genic_upstream_transcript_variant                                                  |
| rs1471052912 | intron_variant                                                                                    |
| rs1471058108 | intron_variant,genic_upstream_transcript_variant                                                  |
| rs1471072231 | intron_variant,genic_downstream_transcript_variant                                                |
| rs1471084645 | intron_variant                                                                                    |
| rs1471095987 | intron_variant                                                                                    |
| rs1471124167 | intron_variant,genic_upstream_transcript_variant                                                  |
| rs1471165985 | intron_variant                                                                                    |
| rs1471197190 | intron_variant,genic_upstream_transcript_variant                                                  |
| rs1471202319 | intron_variant,genic_upstream_transcript_variant                                                  |
| rs1471206255 | intron_variant,genic_upstream_transcript_variant                                                  |
| rs1471217530 | intron_variant                                                                                    |
| rs1471243231 | intron_variant                                                                                    |
| rs1471266287 | intron_variant,genic_downstream_transcript_variant                                                |
| rs1471297164 | intron_variant,genic_upstream_transcript_variant                                                  |
| rs1471303322 | intron_variant,genic_upstream_transcript_variant                                                  |
| rs1471316786 | intron_variant                                                                                    |
| rs1471339022 | intron_variant,genic_downstream_transcript_variant                                                |
| rs1471370270 | intron_variant,genic_downstream_transcript_variant                                                |
| rs1471375204 | intron_variant                                                                                    |
| rs1471402205 | intron_variant                                                                                    |
| rs1471412621 | intron_variant,genic_upstream_transcript_variant                                                  |

|              |                                                                                                                         |
|--------------|-------------------------------------------------------------------------------------------------------------------------|
| rs1471443861 | intron_variant,genic_upstream_transcript_variant                                                                        |
| rs1471475217 | intron_variant,genic_upstream_transcript_variant                                                                        |
| rs1471526693 | intron_variant,genic_upstream_transcript_variant                                                                        |
| rs1471550637 | intron_variant,genic_upstream_transcript_variant                                                                        |
| rs1471565340 | intron_variant                                                                                                          |
| rs1471596756 | intron_variant                                                                                                          |
| rs1471617198 | intron_variant                                                                                                          |
| rs1471629689 | intron_variant,genic_downstream_transcript_variant                                                                      |
| rs1471634317 | intron_variant,genic_upstream_transcript_variant                                                                        |
| rs1471639389 | intron_variant,genic_downstream_transcript_variant                                                                      |
| rs1471660917 | intron_variant,genic_upstream_transcript_variant                                                                        |
| rs1471705418 | intron_variant                                                                                                          |
| rs1471715092 | intron_variant                                                                                                          |
| rs1471757345 | intron_variant,genic_downstream_transcript_variant                                                                      |
| rs1471758147 | intron_variant                                                                                                          |
| rs1471765530 | intron_variant                                                                                                          |
| rs1471771231 | non_coding_transcript_variant,intron_variant,genic_upstream_transcript_variant,missense_variant,coding_sequence_variant |
| rs1471801414 | intron_variant,genic_upstream_transcript_variant                                                                        |
| rs1471829083 | intron_variant,genic_upstream_transcript_variant                                                                        |
| rs1471872109 | intron_variant,genic_upstream_transcript_variant                                                                        |
| rs1471885354 | intron_variant,genic_upstream_transcript_variant                                                                        |
| rs1471888493 | intron_variant                                                                                                          |
| rs1471890312 | intron_variant                                                                                                          |
| rs1471919853 | intron_variant,genic_downstream_transcript_variant                                                                      |
| rs1471923598 | intron_variant,genic_upstream_transcript_variant                                                                        |
| rs1471946232 | intron_variant                                                                                                          |
| rs1471949329 | intron_variant                                                                                                          |
| rs1471962014 | intron_variant,upstream_transcript_variant,genic_upstream_transcript_variant                                            |
| rs1471993320 | intron_variant                                                                                                          |
| rs1472014282 | intron_variant,genic_upstream_transcript_variant                                                                        |
| rs1472030890 | intron_variant,genic_upstream_transcript_variant                                                                        |
| rs1472040277 | intron_variant,genic_downstream_transcript_variant                                                                      |
| rs1472107669 | intron_variant,genic_upstream_transcript_variant                                                                        |
| rs1472112096 | intron_variant,genic_downstream_transcript_variant                                                                      |
| rs1472133668 | intron_variant                                                                                                          |
| rs1472155004 | intron_variant                                                                                                          |
| rs1472158181 | intron_variant,genic_upstream_transcript_variant                                                                        |
| rs1472165769 | intron_variant,genic_downstream_transcript_variant                                                                      |
| rs1472200730 | intron_variant,genic_downstream_transcript_variant                                                                      |
| rs1472239992 | intron_variant                                                                                                          |
| rs1472254090 | 3_prime_UTR_variant,genic_downstream_transcript_variant,non_coding_transcript_variant                                   |
| rs1472301553 | intron_variant                                                                                                          |
| rs1472310046 | intron_variant                                                                                                          |
| rs1472312326 | intron_variant,genic_upstream_transcript_variant                                                                        |
| rs1472337574 | intron_variant,genic_downstream_transcript_variant                                                                      |
| rs1472363479 | intron_variant,genic_upstream_transcript_variant                                                                        |
| rs1472373417 | intron_variant,genic_downstream_transcript_variant                                                                      |
| rs1472379337 | intron_variant,genic_upstream_transcript_variant                                                                        |
| rs1472417343 | intron_variant,genic_upstream_transcript_variant                                                                        |
| rs1472439557 | intron_variant,genic_upstream_transcript_variant                                                                        |
| rs1472471154 | intron_variant,genic_upstream_transcript_variant                                                                        |
| rs1472521190 | intron_variant,genic_upstream_transcript_variant,upstream_transcript_variant                                            |
| rs1472597977 | intron_variant,genic_upstream_transcript_variant                                                                        |
| rs1472721419 | intron_variant,2KB_upstream_variant,genic_upstream_transcript_variant,upstream_transcript_variant                       |
| rs1472749202 | intron_variant                                                                                                          |
| rs1472776181 | intron_variant,genic_upstream_transcript_variant                                                                        |
| rs1472796639 | intron_variant,genic_upstream_transcript_variant                                                                        |
| rs1472812687 | intron_variant                                                                                                          |
| rs1472818144 | intron_variant                                                                                                          |
| rs1472825053 | intron_variant,genic_downstream_transcript_variant                                                                      |
| rs1472848287 | intron_variant                                                                                                          |
| rs1472894791 | intron_variant,genic_upstream_transcript_variant                                                                        |
| rs1472908014 | intron_variant,genic_upstream_transcript_variant                                                                        |
| rs1472946515 | intron_variant,genic_upstream_transcript_variant                                                                        |
| rs1472948931 | intron_variant                                                                                                          |
| rs1472955637 | intron_variant                                                                                                          |
| rs1472964154 | intron_variant,genic_upstream_transcript_variant                                                                        |
| rs1472988780 | intron_variant,genic_downstream_transcript_variant                                                                      |
| rs1473009267 | intron_variant,genic_upstream_transcript_variant                                                                        |
| rs1473024577 | intron_variant,genic_downstream_transcript_variant                                                                      |
| rs1473030685 | intron_variant                                                                                                          |
| rs1473108158 | intron_variant,genic_upstream_transcript_variant                                                                        |
| rs1473110442 | intron_variant                                                                                                          |
| rs1473172801 | intron_variant                                                                                                          |

|              |                                                                                                   |
|--------------|---------------------------------------------------------------------------------------------------|
| rs1473194512 | intron_variant                                                                                    |
| rs1473203091 | intron_variant,genic_downstream_transcript_variant                                                |
| rs1473211467 | intron_variant                                                                                    |
| rs1473212769 | intron_variant,downstream_transcript_variant,genic_downstream_transcript_variant                  |
| rs1473283918 | intron_variant                                                                                    |
| rs1473293845 | intron_variant,genic_upstream_transcript_variant                                                  |
| rs1473331089 | intron_variant,genic_upstream_transcript_variant,upstream_transcript_variant                      |
| rs1473331187 | intron_variant,genic_upstream_transcript_variant                                                  |
| rs1473372031 | intron_variant,genic_upstream_transcript_variant                                                  |
| rs1473375943 | intron_variant                                                                                    |
| rs1473383342 | intron_variant                                                                                    |
| rs1473401025 | intron_variant,genic_upstream_transcript_variant                                                  |
| rs1473409460 | intron_variant,genic_upstream_transcript_variant                                                  |
| rs1473416923 | intron_variant,genic_upstream_transcript_variant                                                  |
| rs1473470938 | intron_variant,genic_downstream_transcript_variant                                                |
| rs1473509273 | intron_variant                                                                                    |
| rs1473563032 | intron_variant,genic_upstream_transcript_variant,upstream_transcript_variant                      |
| rs1473599659 | intron_variant,genic_downstream_transcript_variant                                                |
| rs1473666614 | intron_variant                                                                                    |
| rs1473725374 | intron_variant,genic_downstream_transcript_variant                                                |
| rs1473725949 | intron_variant                                                                                    |
| rs1473751270 | intron_variant                                                                                    |
| rs1473797220 | intron_variant,genic_downstream_transcript_variant                                                |
| rs1473904760 | intron_variant,genic_downstream_transcript_variant                                                |
| rs1473931446 | intron_variant,genic_upstream_transcript_variant                                                  |
| rs1474014047 | intron_variant                                                                                    |
| rs1474057520 | intron_variant                                                                                    |
| rs1474092743 | intron_variant,genic_upstream_transcript_variant                                                  |
| rs1474104670 | intron_variant                                                                                    |
| rs1474112787 | intron_variant,genic_upstream_transcript_variant,upstream_transcript_variant                      |
| rs1474129454 | intron_variant,genic_upstream_transcript_variant                                                  |
| rs1474137238 | intron_variant,genic_upstream_transcript_variant                                                  |
| rs1474207174 | intron_variant,genic_upstream_transcript_variant                                                  |
| rs1474230051 | intron_variant,genic_upstream_transcript_variant                                                  |
| rs1474271700 | intron_variant,genic_downstream_transcript_variant                                                |
| rs1474325414 | intron_variant,genic_upstream_transcript_variant                                                  |
| rs1474352691 | intron_variant,genic_upstream_transcript_variant                                                  |
| rs1474395856 | intron_variant,genic_downstream_transcript_variant                                                |
| rs1474428051 | intron_variant                                                                                    |
| rs1474469603 | intron_variant,genic_downstream_transcript_variant                                                |
| rs1474481016 | intron_variant                                                                                    |
| rs1474524549 | intron_variant                                                                                    |
| rs1474554445 | intron_variant,genic_upstream_transcript_variant,2KB_upstream_variant,upstream_transcript_variant |
| rs1474563324 | intron_variant                                                                                    |
| rs1474571914 | intron_variant,genic_upstream_transcript_variant                                                  |
| rs1474648846 | intron_variant,genic_upstream_transcript_variant                                                  |
| rs1474685739 | intron_variant,genic_upstream_transcript_variant                                                  |
| rs1474751718 | intron_variant,genic_downstream_transcript_variant                                                |
| rs1474779476 | intron_variant,genic_downstream_transcript_variant                                                |
| rs1474796371 | intron_variant,genic_upstream_transcript_variant                                                  |
| rs1474822316 | intron_variant,genic_upstream_transcript_variant                                                  |
| rs1474834778 | intron_variant,genic_downstream_transcript_variant                                                |
| rs1474855429 | intron_variant                                                                                    |
| rs1474872589 | intron_variant                                                                                    |
| rs1474882149 | intron_variant,genic_downstream_transcript_variant                                                |
| rs1474882221 | intron_variant                                                                                    |
| rs1474905647 | intron_variant,genic_downstream_transcript_variant                                                |
| rs1474916773 | intron_variant,genic_downstream_transcript_variant                                                |
| rs1474965042 | intron_variant                                                                                    |
| rs1474970042 | intron_variant,genic_upstream_transcript_variant                                                  |
| rs1474993228 | intron_variant                                                                                    |
| rs1475034564 | intron_variant,genic_downstream_transcript_variant                                                |
| rs1475042140 | intron_variant                                                                                    |
| rs1475063748 | intron_variant                                                                                    |
| rs1475076306 | intron_variant,genic_upstream_transcript_variant,2KB_upstream_variant,upstream_transcript_variant |
| rs1475083268 | intron_variant,genic_upstream_transcript_variant                                                  |
| rs1475092028 | intron_variant                                                                                    |
| rs1475118987 | intron_variant                                                                                    |
| rs1475127248 | intron_variant,genic_downstream_transcript_variant                                                |
| rs1475143584 | intron_variant                                                                                    |
| rs1475149954 | intron_variant,genic_upstream_transcript_variant                                                  |
| rs1475200939 | intron_variant,genic_upstream_transcript_variant                                                  |
| rs1475241559 | intron_variant,genic_upstream_transcript_variant,upstream_transcript_variant                      |
| rs1475250577 | intron_variant,genic_downstream_transcript_variant                                                |

|              |                                                                                                                                             |
|--------------|---------------------------------------------------------------------------------------------------------------------------------------------|
| rs1475253659 | intron_variant,genic_downstream_transcript_variant                                                                                          |
| rs1475257408 | intron_variant,genic_upstream_transcript_variant                                                                                            |
| rs1475263734 | intron_variant                                                                                                                              |
| rs1475295308 | intron_variant                                                                                                                              |
| rs1475309527 | intron_variant,genic_upstream_transcript_variant                                                                                            |
| rs1475335367 | intron_variant,genic_upstream_transcript_variant                                                                                            |
| rs1475340254 | intron_variant                                                                                                                              |
| rs1475341195 | non_coding_transcript_variant,3_prime_UTR_variant,genic_downstream_transcript_variant                                                       |
| rs1475364488 | intron_variant,genic_upstream_transcript_variant                                                                                            |
| rs1475386083 | intron_variant,genic_downstream_transcript_variant                                                                                          |
| rs1475388757 | intron_variant,genic_downstream_transcript_variant                                                                                          |
| rs1475417421 | intron_variant,genic_downstream_transcript_variant                                                                                          |
| rs1475452714 | intron_variant,genic_downstream_transcript_variant                                                                                          |
| rs1475460487 | intron_variant,2KB_upstream_variant,genic_upstream_transcript_variant,upstream_transcript_variant                                           |
| rs1475475983 | intron_variant,genic_upstream_transcript_variant                                                                                            |
| rs1475488646 | intron_variant,genic_downstream_transcript_variant                                                                                          |
| rs1475504718 | intron_variant                                                                                                                              |
| rs1475523402 | intron_variant                                                                                                                              |
| rs1475551041 | intron_variant,genic_upstream_transcript_variant                                                                                            |
| rs1475558388 | intron_variant,genic_upstream_transcript_variant,upstream_transcript_variant                                                                |
| rs1475568194 | intron_variant                                                                                                                              |
| rs1475593851 | intron_variant,genic_upstream_transcript_variant                                                                                            |
| rs1475623284 | intron_variant,genic_upstream_transcript_variant                                                                                            |
| rs1475700186 | intron_variant,genic_upstream_transcript_variant,2KB_upstream_variant,upstream_transcript_variant                                           |
| rs1475706415 | intron_variant,genic_upstream_transcript_variant                                                                                            |
| rs1475746759 | intron_variant                                                                                                                              |
| rs1475792756 | intron_variant,genic_upstream_transcript_variant                                                                                            |
| rs1475793487 | missense_variant,non_coding_transcript_variant,5_prime_UTR_variant,intron_variant,genic_upstream_transcript_variant,coding_sequence_variant |
| rs1475849844 | intron_variant,genic_upstream_transcript_variant                                                                                            |
| rs1475864834 | intron_variant,genic_upstream_transcript_variant                                                                                            |
| rs1475879333 | intron_variant,genic_downstream_transcript_variant                                                                                          |
| rs1475899463 | intron_variant                                                                                                                              |
| rs1475906870 | intron_variant,genic_downstream_transcript_variant                                                                                          |
| rs1475953534 | intron_variant                                                                                                                              |
| rs1475963796 | intron_variant                                                                                                                              |
| rs1475972083 | intron_variant,genic_downstream_transcript_variant                                                                                          |
| rs1475974266 | intron_variant,genic_upstream_transcript_variant                                                                                            |
| rs1475982538 | intron_variant,genic_upstream_transcript_variant                                                                                            |
| rs1475996706 | intron_variant,genic_upstream_transcript_variant                                                                                            |
| rs1476047036 | intron_variant,genic_upstream_transcript_variant                                                                                            |
| rs1476090447 | intron_variant,genic_upstream_transcript_variant                                                                                            |
| rs1476091589 | intron_variant,genic_upstream_transcript_variant                                                                                            |
| rs1476123942 | intron_variant,genic_upstream_transcript_variant                                                                                            |
| rs1476137150 | intron_variant                                                                                                                              |
| rs1476167998 | intron_variant,genic_upstream_transcript_variant                                                                                            |
| rs1476171184 | intron_variant,genic_downstream_transcript_variant                                                                                          |
| rs1476174048 | intron_variant,genic_upstream_transcript_variant                                                                                            |
| rs1476181476 | non_coding_transcript_variant,synonymous_variant,intron_variant,genic_upstream_transcript_variant,coding_sequence_variant                   |
| rs1476211668 | intron_variant                                                                                                                              |
| rs1476230479 | intron_variant,genic_upstream_transcript_variant                                                                                            |
| rs1476243774 | intron_variant                                                                                                                              |
| rs1476250568 | intron_variant,genic_upstream_transcript_variant                                                                                            |
| rs1476298502 | intron_variant                                                                                                                              |
| rs1476318059 | intron_variant,genic_upstream_transcript_variant                                                                                            |
| rs1476359557 | intron_variant,genic_downstream_transcript_variant                                                                                          |
| rs1476376319 | intron_variant                                                                                                                              |
| rs1476392094 | intron_variant,genic_upstream_transcript_variant                                                                                            |
| rs1476422089 | intron_variant                                                                                                                              |
| rs1476486510 | intron_variant                                                                                                                              |
| rs1476503072 | intron_variant,genic_upstream_transcript_variant                                                                                            |
| rs1476527441 | intron_variant,genic_downstream_transcript_variant                                                                                          |
| rs1476535640 | intron_variant                                                                                                                              |
| rs1476539762 | intron_variant                                                                                                                              |
| rs1476580184 | intron_variant,genic_upstream_transcript_variant                                                                                            |
| rs1476599154 | intron_variant,genic_upstream_transcript_variant                                                                                            |
| rs1476621236 | intron_variant                                                                                                                              |
| rs1476632186 | intron_variant                                                                                                                              |
| rs1476663078 | intron_variant                                                                                                                              |
| rs1476695921 | intron_variant                                                                                                                              |
| rs1476723911 | intron_variant,genic_downstream_transcript_variant                                                                                          |
| rs1476747674 | intron_variant                                                                                                                              |
| rs1476751135 | intron_variant                                                                                                                              |
| rs1476752378 | intron_variant,genic_downstream_transcript_variant                                                                                          |
| rs1476793520 | intron_variant,genic_downstream_transcript_variant                                                                                          |

|              |                                                                                                   |
|--------------|---------------------------------------------------------------------------------------------------|
| rs1476808645 | intron_variant                                                                                    |
| rs1476831644 | intron_variant                                                                                    |
| rs1476901924 | intron_variant,genic_downstream_transcript_variant                                                |
| rs1476905200 | intron_variant                                                                                    |
| rs1476907147 | intron_variant                                                                                    |
| rs1476913593 | intron_variant,genic_upstream_transcript_variant,2KB_upstream_variant,upstream_transcript_variant |
| rs1476962956 | intron_variant                                                                                    |
| rs1476968208 | intron_variant,genic_upstream_transcript_variant                                                  |
| rs1477011944 | intron_variant                                                                                    |
| rs1477030491 | intron_variant,genic_upstream_transcript_variant                                                  |
| rs1477045700 | intron_variant,genic_upstream_transcript_variant                                                  |
| rs1477052573 | intron_variant                                                                                    |
| rs1477068130 | intron_variant,genic_upstream_transcript_variant                                                  |
| rs1477086510 | intron_variant                                                                                    |
| rs1477100442 | intron_variant,genic_upstream_transcript_variant,upstream_transcript_variant                      |
| rs1477129221 | intron_variant                                                                                    |
| rs1477203465 | intron_variant                                                                                    |
| rs1477206868 | intron_variant,genic_upstream_transcript_variant                                                  |
| rs1477211170 | intron_variant,2KB_upstream_variant,genic_upstream_transcript_variant,upstream_transcript_variant |
| rs1477241899 | intron_variant                                                                                    |
| rs1477242339 | intron_variant                                                                                    |
| rs1477248197 | intron_variant                                                                                    |
| rs1477334210 | intron_variant,genic_downstream_transcript_variant                                                |
| rs1477411494 | intron_variant                                                                                    |
| rs1477416653 | intron_variant                                                                                    |
| rs1477440268 | intron_variant,genic_upstream_transcript_variant,upstream_transcript_variant                      |
| rs1477450780 | intron_variant,genic_upstream_transcript_variant                                                  |
| rs1477525299 | intron_variant                                                                                    |
| rs1477577123 | intron_variant                                                                                    |
| rs1477602415 | intron_variant,genic_upstream_transcript_variant                                                  |
| rs1477627936 | intron_variant,genic_upstream_transcript_variant                                                  |
| rs1477730068 | intron_variant,genic_downstream_transcript_variant                                                |
| rs1477780615 | intron_variant,genic_upstream_transcript_variant                                                  |
| rs1477798277 | intron_variant,genic_downstream_transcript_variant                                                |
| rs1477804860 | intron_variant,genic_upstream_transcript_variant                                                  |
| rs1477805888 | intron_variant,genic_upstream_transcript_variant                                                  |
| rs1477858346 | intron_variant,genic_upstream_transcript_variant                                                  |
| rs1477863411 | intron_variant,downstream_transcript_variant,genic_downstream_transcript_variant                  |
| rs1477873614 | intron_variant,genic_upstream_transcript_variant,5_prime_UTR_variant,upstream_transcript_variant  |
| rs1477900424 | intron_variant,genic_upstream_transcript_variant,2KB_upstream_variant,upstream_transcript_variant |
| rs1477903538 | intron_variant,genic_upstream_transcript_variant                                                  |
| rs1477934215 | intron_variant,genic_upstream_transcript_variant                                                  |
| rs1477950465 | intron_variant,genic_upstream_transcript_variant                                                  |
| rs1477958599 | intron_variant                                                                                    |
| rs1477971577 | intron_variant,genic_upstream_transcript_variant,2KB_upstream_variant,upstream_transcript_variant |
| rs1477982508 | intron_variant                                                                                    |
| rs1477999566 | intron_variant,genic_downstream_transcript_variant                                                |
| rs1478014787 | intron_variant,genic_upstream_transcript_variant                                                  |
| rs1478034359 | intron_variant,genic_upstream_transcript_variant                                                  |
| rs1478054694 | intron_variant,genic_upstream_transcript_variant,2KB_upstream_variant,upstream_transcript_variant |
| rs1478064081 | intron_variant                                                                                    |
| rs1478076619 | intron_variant                                                                                    |
| rs1478094108 | intron_variant                                                                                    |
| rs1478123754 | intron_variant                                                                                    |
| rs1478141567 | intron_variant,genic_upstream_transcript_variant                                                  |
| rs1478165479 | intron_variant,genic_upstream_transcript_variant                                                  |
| rs1478169977 | intron_variant                                                                                    |
| rs1478171934 | intron_variant                                                                                    |
| rs1478177098 | intron_variant                                                                                    |
| rs1478193657 | intron_variant,genic_upstream_transcript_variant                                                  |
| rs1478196236 | intron_variant                                                                                    |
| rs1478211081 | intron_variant                                                                                    |
| rs1478240562 | intron_variant                                                                                    |
| rs1478245295 | intron_variant,genic_upstream_transcript_variant                                                  |
| rs1478309709 | intron_variant                                                                                    |
| rs1478341454 | intron_variant,genic_upstream_transcript_variant                                                  |
| rs1478342550 | intron_variant,genic_downstream_transcript_variant                                                |
| rs1478354144 | intron_variant,genic_upstream_transcript_variant,upstream_transcript_variant                      |
| rs1478365783 | intron_variant                                                                                    |
| rs1478387407 | intron_variant,genic_downstream_transcript_variant                                                |
| rs1478413316 | intron_variant,genic_downstream_transcript_variant                                                |
| rs1478417758 | intron_variant,genic_upstream_transcript_variant,upstream_transcript_variant                      |
| rs1478445084 | intron_variant,genic_upstream_transcript_variant                                                  |
| rs1478459069 | intron_variant,genic_upstream_transcript_variant                                                  |

|              |                                                                                                            |
|--------------|------------------------------------------------------------------------------------------------------------|
| rs1478460600 | intron_variant,genic_upstream_transcript_variant                                                           |
| rs1478529145 | intron_variant,genic_downstream_transcript_variant                                                         |
| rs1478539017 | intron_variant,genic_downstream_transcript_variant                                                         |
| rs1478575668 | intron_variant                                                                                             |
| rs1478591342 | intron_variant                                                                                             |
| rs1478616291 | intron_variant,genic_upstream_transcript_variant                                                           |
| rs1478651227 | intron_variant,genic_upstream_transcript_variant                                                           |
| rs1478713190 | intron_variant,genic_upstream_transcript_variant                                                           |
| rs1478714826 | intron_variant,genic_downstream_transcript_variant                                                         |
| rs1478724742 | intron_variant,genic_upstream_transcript_variant                                                           |
| rs1478751211 | intron_variant,genic_upstream_transcript_variant                                                           |
| rs1478756815 | intron_variant                                                                                             |
| rs1478813703 | intron_variant,genic_upstream_transcript_variant                                                           |
| rs1478821526 | intron_variant,genic_upstream_transcript_variant                                                           |
| rs1478857697 | intron_variant,genic_upstream_transcript_variant                                                           |
| rs1478883319 | intron_variant                                                                                             |
| rs1478887285 | intron_variant,genic_upstream_transcript_variant                                                           |
| rs1478934235 | intron_variant,genic_upstream_transcript_variant                                                           |
| rs1478944328 | downstream_transcript_variant,500B_downstream_variant                                                      |
| rs1478952827 | intron_variant,genic_upstream_transcript_variant                                                           |
| rs1479053902 | intron_variant                                                                                             |
| rs1479092984 | non_coding_transcript_variant,3_prime_UTR_variant,genic_downstream_transcript_variant                      |
| rs1479103687 | intron_variant                                                                                             |
| rs1479124638 | intron_variant,genic_downstream_transcript_variant                                                         |
| rs1479175339 | intron_variant,5_prime_UTR_variant                                                                         |
| rs1479217784 | intron_variant,genic_upstream_transcript_variant                                                           |
| rs1479224444 | intron_variant                                                                                             |
| rs1479258351 | intron_variant,genic_upstream_transcript_variant,2KB_upstream_variant,upstream_transcript_variant          |
| rs1479284540 | intron_variant                                                                                             |
| rs1479315080 | intron_variant,genic_downstream_transcript_variant                                                         |
| rs1479375451 | intron_variant,genic_downstream_transcript_variant                                                         |
| rs1479405538 | intron_variant,genic_upstream_transcript_variant                                                           |
| rs1479425814 | intron_variant                                                                                             |
| rs1479427022 | intron_variant                                                                                             |
| rs1479431690 | intron_variant                                                                                             |
| rs1479443815 | intron_variant,2KB_upstream_variant,genic_upstream_transcript_variant,upstream_transcript_variant          |
| rs1479460697 | intron_variant,genic_upstream_transcript_variant                                                           |
| rs1479471931 | intron_variant                                                                                             |
| rs1479473084 | intron_variant                                                                                             |
| rs1479499793 | intron_variant                                                                                             |
| rs1479570605 | intron_variant                                                                                             |
| rs1479625993 | intron_variant                                                                                             |
| rs1479662080 | intron_variant                                                                                             |
| rs1479674474 | intron_variant,genic_upstream_transcript_variant                                                           |
| rs1479677265 | intron_variant,genic_upstream_transcript_variant                                                           |
| rs1479691783 | intron_variant,genic_downstream_transcript_variant                                                         |
| rs1479699442 | intron_variant                                                                                             |
| rs1479757854 | non_coding_transcript_variant,3_prime_UTR_variant,genic_downstream_transcript_variant                      |
| rs1479781564 | intron_variant,genic_upstream_transcript_variant,upstream_transcript_variant                               |
| rs1479812968 | intron_variant,genic_upstream_transcript_variant                                                           |
| rs1479821329 | intron_variant,genic_upstream_transcript_variant,upstream_transcript_variant                               |
| rs1479823060 | intron_variant                                                                                             |
| rs1479841425 | intron_variant,genic_downstream_transcript_variant                                                         |
| rs1479863093 | intron_variant,genic_downstream_transcript_variant                                                         |
| rs1479866206 | intron_variant,genic_downstream_transcript_variant                                                         |
| rs1479888151 | intron_variant,genic_downstream_transcript_variant                                                         |
| rs1479922279 | missense_variant,non_coding_transcript_variant,coding_sequence_variant,genic_downstream_transcript_variant |
| rs1479947015 | intron_variant                                                                                             |
| rs1479961269 | intron_variant                                                                                             |
| rs1479977605 | intron_variant,genic_upstream_transcript_variant                                                           |
| rs1480021172 | intron_variant,genic_upstream_transcript_variant                                                           |
| rs1480082286 | intron_variant                                                                                             |
| rs1480155482 | intron_variant,genic_upstream_transcript_variant                                                           |
| rs1480164174 | intron_variant,genic_upstream_transcript_variant                                                           |
| rs1480198497 | intron_variant,genic_upstream_transcript_variant                                                           |
| rs1480199513 | intron_variant,genic_upstream_transcript_variant                                                           |
| rs1480203867 | intron_variant                                                                                             |
| rs1480205274 | intron_variant,genic_upstream_transcript_variant                                                           |
| rs1480269845 | intron_variant,genic_upstream_transcript_variant                                                           |
| rs1480302028 | intron_variant,genic_upstream_transcript_variant,upstream_transcript_variant                               |
| rs1480374159 | intron_variant,genic_upstream_transcript_variant,2KB_upstream_variant,upstream_transcript_variant          |
| rs1480415008 | intron_variant,genic_downstream_transcript_variant                                                         |
| rs1480447352 | intron_variant                                                                                             |
| rs1480456685 | intron_variant,genic_upstream_transcript_variant                                                           |

|              |                                                                                                    |
|--------------|----------------------------------------------------------------------------------------------------|
| rs1480483503 | intron_variant,genic_upstream_transcript_variant                                                   |
| rs1480494573 | intron_variant,genic_upstream_transcript_variant                                                   |
| rs1480510695 | intron_variant                                                                                     |
| rs1480558829 | intron_variant                                                                                     |
| rs1480561281 | intron_variant                                                                                     |
| rs1480618977 | intron_variant,genic_upstream_transcript_variant                                                   |
| rs1480651071 | intron_variant                                                                                     |
| rs1480726688 | intron_variant                                                                                     |
| rs1480743073 | intron_variant                                                                                     |
| rs1480745255 | intron_variant,genic_upstream_transcript_variant                                                   |
| rs1480748322 | intron_variant,genic_upstream_transcript_variant                                                   |
| rs1480779494 | intron_variant,genic_upstream_transcript_variant                                                   |
| rs1480820481 | intron_variant,genic_upstream_transcript_variant                                                   |
| rs1480822757 | intron_variant,genic_upstream_transcript_variant                                                   |
| rs1480832177 | intron_variant                                                                                     |
| rs1480836467 | intron_variant                                                                                     |
| rs1480847553 | intron_variant                                                                                     |
| rs1480850996 | intron_variant,genic_upstream_transcript_variant                                                   |
| rs1480855284 | intron_variant,genic_upstream_transcript_variant                                                   |
| rs1480897321 | intron_variant,genic_upstream_transcript_variant                                                   |
| rs1480944800 | intron_variant                                                                                     |
| rs1480949752 | intron_variant,genic_upstream_transcript_variant                                                   |
| rs1480957914 | intron_variant                                                                                     |
| rs1480982760 | intron_variant,genic_upstream_transcript_variant                                                   |
| rs1480992030 | intron_variant,genic_upstream_transcript_variant,5_prime_UTR_variant,non_coding_transcript_variant |
| rs1481001006 | intron_variant                                                                                     |
| rs1481027601 | intron_variant                                                                                     |
| rs1481045075 | intron_variant,genic_upstream_transcript_variant                                                   |
| rs1481056466 | intron_variant                                                                                     |
| rs1481069158 | intron_variant                                                                                     |
| rs1481079082 | intron_variant,genic_upstream_transcript_variant                                                   |
| rs1481127155 | intron_variant                                                                                     |
| rs1481160556 | intron_variant                                                                                     |
| rs1481186576 | intron_variant,genic_downstream_transcript_variant                                                 |
| rs1481204970 | intron_variant                                                                                     |
| rs1481307133 | intron_variant,genic_upstream_transcript_variant                                                   |
| rs1481340712 | intron_variant                                                                                     |
| rs1481343753 | intron_variant,genic_upstream_transcript_variant                                                   |
| rs1481399950 | intron_variant,genic_upstream_transcript_variant                                                   |
| rs1481546200 | intron_variant                                                                                     |
| rs1481565195 | intron_variant,genic_upstream_transcript_variant                                                   |
| rs1481604698 | intron_variant,genic_upstream_transcript_variant                                                   |
| rs1481637404 | non_coding_transcript_variant,3_prime_UTR_variant,genic_downstream_transcript_variant              |
| rs1481649459 | intron_variant,genic_upstream_transcript_variant                                                   |
| rs1481670311 | missense_variant,coding_sequence_variant,intron_variant                                            |
| rs1481695346 | intron_variant,genic_upstream_transcript_variant,upstream_transcript_variant                       |
| rs1481706317 | intron_variant,genic_upstream_transcript_variant                                                   |
| rs1481712626 | intron_variant                                                                                     |
| rs1481767625 | intron_variant                                                                                     |
| rs1481790173 | intron_variant,genic_upstream_transcript_variant                                                   |
| rs1481812764 | missense_variant,coding_sequence_variant,non_coding_transcript_variant                             |
| rs1481816899 | intron_variant,genic_upstream_transcript_variant                                                   |
| rs1481822057 | intron_variant,genic_downstream_transcript_variant                                                 |
| rs1481851508 | intron_variant,genic_downstream_transcript_variant                                                 |
| rs1481859788 | intron_variant,genic_upstream_transcript_variant                                                   |
| rs1481891266 | intron_variant                                                                                     |
| rs1481953607 | intron_variant,genic_upstream_transcript_variant                                                   |
| rs1481988270 | intron_variant,genic_upstream_transcript_variant                                                   |
| rs1482024699 | intron_variant,genic_upstream_transcript_variant                                                   |
| rs1482038148 | intron_variant                                                                                     |
| rs1482052342 | intron_variant,genic_upstream_transcript_variant                                                   |
| rs1482112531 | intron_variant                                                                                     |
| rs1482114846 | intron_variant,genic_upstream_transcript_variant                                                   |
| rs1482157538 | intron_variant                                                                                     |
| rs1482163003 | intron_variant                                                                                     |
| rs1482172028 | intron_variant,genic_upstream_transcript_variant                                                   |
| rs1482189818 | intron_variant,genic_downstream_transcript_variant                                                 |
| rs1482220350 | intron_variant,genic_upstream_transcript_variant,upstream_transcript_variant                       |
| rs1482274809 | intron_variant,genic_upstream_transcript_variant                                                   |
| rs1482291678 | intron_variant                                                                                     |
| rs1482314442 | intron_variant,genic_downstream_transcript_variant                                                 |
| rs1482338664 | intron_variant,genic_upstream_transcript_variant,5_prime_UTR_variant,non_coding_transcript_variant |
| rs1482344585 | intron_variant                                                                                     |
| rs1482345480 | intron_variant,genic_upstream_transcript_variant                                                   |

|              |                                                                                                                         |
|--------------|-------------------------------------------------------------------------------------------------------------------------|
| rs1482387416 | intron_variant,genic_upstream_transcript_variant                                                                        |
| rs1482388846 | intron_variant,genic_downstream_transcript_variant                                                                      |
| rs1482401194 | intron_variant,genic_upstream_transcript_variant                                                                        |
| rs1482429940 | intron_variant,genic_downstream_transcript_variant                                                                      |
| rs1482441537 | intron_variant,genic_upstream_transcript_variant                                                                        |
| rs1482456002 | intron_variant,genic_upstream_transcript_variant,upstream_transcript_variant                                            |
| rs1482464682 | intron_variant                                                                                                          |
| rs1482488279 | intron_variant,5_prime_UTR_variant                                                                                      |
| rs1482504802 | intron_variant,genic_upstream_transcript_variant                                                                        |
| rs1482519148 | intron_variant,genic_downstream_transcript_variant                                                                      |
| rs1482585796 | intron_variant,genic_upstream_transcript_variant                                                                        |
| rs1482618203 | intron_variant,genic_upstream_transcript_variant,2KB_upstream_variant,upstream_transcript_variant                       |
| rs1482625026 | intron_variant                                                                                                          |
| rs1482666895 | non_coding_transcript_variant,3_prime_UTR_variant,genic_downstream_transcript_variant                                   |
| rs1482673878 | intron_variant,genic_downstream_transcript_variant                                                                      |
| rs1482718503 | intron_variant,genic_upstream_transcript_variant                                                                        |
| rs1482747692 | intron_variant,genic_upstream_transcript_variant                                                                        |
| rs1482750356 | intron_variant,genic_downstream_transcript_variant                                                                      |
| rs1482751478 | intron_variant                                                                                                          |
| rs1482855774 | intron_variant,genic_upstream_transcript_variant                                                                        |
| rs1482876977 | intron_variant                                                                                                          |
| rs1482902407 | intron_variant                                                                                                          |
| rs1482936987 | intron_variant,genic_upstream_transcript_variant                                                                        |
| rs1482946975 | intron_variant                                                                                                          |
| rs1482953958 | intron_variant,genic_upstream_transcript_variant                                                                        |
| rs1482975755 | intron_variant                                                                                                          |
| rs1483011496 | intron_variant,genic_downstream_transcript_variant                                                                      |
| rs1483019341 | intron_variant                                                                                                          |
| rs1483068972 | intron_variant,genic_downstream_transcript_variant                                                                      |
| rs1483082485 | intron_variant,genic_upstream_transcript_variant,upstream_transcript_variant                                            |
| rs1483096799 | intron_variant                                                                                                          |
| rs1483116946 | intron_variant,genic_downstream_transcript_variant                                                                      |
| rs1483124041 | intron_variant,genic_upstream_transcript_variant                                                                        |
| rs1483135845 | intron_variant,genic_downstream_transcript_variant                                                                      |
| rs1483143808 | intron_variant,genic_upstream_transcript_variant,upstream_transcript_variant                                            |
| rs1483145083 | intron_variant,genic_downstream_transcript_variant                                                                      |
| rs1483145890 | intron_variant                                                                                                          |
| rs1483147202 | intron_variant                                                                                                          |
| rs1483201933 | non_coding_transcript_variant,3_prime_UTR_variant,genic_downstream_transcript_variant                                   |
| rs1483265267 | intron_variant,genic_downstream_transcript_variant                                                                      |
| rs1483304067 | non_coding_transcript_variant,3_prime_UTR_variant,genic_downstream_transcript_variant                                   |
| rs1483322076 | intron_variant                                                                                                          |
| rs1483403135 | intron_variant                                                                                                          |
| rs1483523557 | intron_variant,genic_downstream_transcript_variant                                                                      |
| rs1483548843 | intron_variant                                                                                                          |
| rs1483667562 | intron_variant,downstream_transcript_variant,genic_downstream_transcript_variant                                        |
| rs1483667995 | intron_variant,genic_downstream_transcript_variant                                                                      |
| rs1483737501 | intron_variant,genic_downstream_transcript_variant                                                                      |
| rs1483777546 | intron_variant,genic_downstream_transcript_variant                                                                      |
| rs1483782606 | intron_variant,genic_upstream_transcript_variant                                                                        |
| rs1483807850 | intron_variant,genic_downstream_transcript_variant                                                                      |
| rs1483846521 | intron_variant                                                                                                          |
| rs1483850580 | missense_variant,non_coding_transcript_variant,intron_variant,genic_upstream_transcript_variant,coding_sequence_variant |
| rs1483859186 | intron_variant                                                                                                          |
| rs1483893840 | non_coding_transcript_variant,3_prime_UTR_variant,genic_downstream_transcript_variant                                   |
| rs1483903823 | intron_variant                                                                                                          |
| rs1483914768 | intron_variant,genic_upstream_transcript_variant                                                                        |
| rs1483943290 | intron_variant,genic_upstream_transcript_variant                                                                        |
| rs1483987790 | intron_variant                                                                                                          |
| rs1483988942 | intron_variant                                                                                                          |
| rs1484022965 | intron_variant,genic_upstream_transcript_variant                                                                        |
| rs1484034938 | intron_variant,genic_upstream_transcript_variant                                                                        |
| rs1484043712 | intron_variant                                                                                                          |
| rs1484082824 | intron_variant                                                                                                          |
| rs1484094975 | intron_variant,genic_upstream_transcript_variant                                                                        |
| rs1484124953 | intron_variant,genic_upstream_transcript_variant,upstream_transcript_variant                                            |
| rs1484157408 | intron_variant,genic_downstream_transcript_variant                                                                      |
| rs1484167928 | intron_variant                                                                                                          |
| rs1484171938 | intron_variant,genic_upstream_transcript_variant                                                                        |
| rs1484179965 | intron_variant                                                                                                          |
| rs1484224007 | intron_variant,genic_upstream_transcript_variant                                                                        |
| rs1484233569 | intron_variant,genic_downstream_transcript_variant                                                                      |
| rs1484267213 | intron_variant                                                                                                          |
| rs1484279382 | intron_variant                                                                                                          |

|              |                                                                                                              |
|--------------|--------------------------------------------------------------------------------------------------------------|
| rs1484279423 | intron_variant,genic_upstream_transcript_variant                                                             |
| rs1484283669 | intron_variant                                                                                               |
| rs1484290026 | intron_variant,genic_upstream_transcript_variant                                                             |
| rs1484298284 | intron_variant                                                                                               |
| rs1484299385 | non_coding_transcript_variant,3_prime_UTR_variant,genic_downstream_transcript_variant                        |
| rs1484337568 | intron_variant,genic_upstream_transcript_variant                                                             |
| rs1484351132 | intron_variant,genic_upstream_transcript_variant                                                             |
| rs1484366894 | intron_variant,genic_upstream_transcript_variant                                                             |
| rs1484384402 | intron_variant,genic_upstream_transcript_variant                                                             |
| rs1484396440 | intron_variant                                                                                               |
| rs1484409688 | intron_variant                                                                                               |
| rs1484419753 | intron_variant,genic_downstream_transcript_variant                                                           |
| rs1484423527 | intron_variant                                                                                               |
| rs1484461683 | intron_variant,2KB_upstream_variant,genic_upstream_transcript_variant,upstream_transcript_variant            |
| rs1484481969 | intron_variant,genic_downstream_transcript_variant                                                           |
| rs1484486848 | intron_variant                                                                                               |
| rs1484493045 | intron_variant                                                                                               |
| rs1484539884 | intron_variant                                                                                               |
| rs1484563123 | intron_variant,genic_upstream_transcript_variant                                                             |
| rs1484565023 | intron_variant,genic_upstream_transcript_variant                                                             |
| rs1484568893 | intron_variant,genic_upstream_transcript_variant                                                             |
| rs1484581761 | intron_variant,genic_downstream_transcript_variant                                                           |
| rs1484625554 | intron_variant                                                                                               |
| rs1484673628 | intron_variant                                                                                               |
| rs1484686832 | intron_variant                                                                                               |
| rs1484728338 | intron_variant,genic_upstream_transcript_variant                                                             |
| rs1484732727 | missense_variant,coding_sequence_variant,non_coding_transcript_variant                                       |
| rs1484737027 | non_coding_transcript_variant,coding_sequence_variant,synonymous_variant,genic_downstream_transcript_variant |
| rs1484767175 | intron_variant                                                                                               |
| rs1484776874 | intron_variant                                                                                               |
| rs1484792652 | intron_variant,genic_upstream_transcript_variant                                                             |
| rs1484799408 | missense_variant,non_coding_transcript_variant,coding_sequence_variant,genic_downstream_transcript_variant   |
| rs1484801445 | intron_variant                                                                                               |
| rs1484808932 | intron_variant,genic_downstream_transcript_variant                                                           |
| rs1484811726 | intron_variant,genic_upstream_transcript_variant                                                             |
| rs1484857617 | intron_variant                                                                                               |
| rs1484861329 | intron_variant,genic_downstream_transcript_variant                                                           |
| rs1484863610 | intron_variant,genic_downstream_transcript_variant                                                           |
| rs1484887472 | intron_variant                                                                                               |
| rs1484956847 | intron_variant                                                                                               |
| rs1485033998 | intron_variant                                                                                               |
| rs1485068410 | intron_variant                                                                                               |
| rs1485105398 | genic_downstream_transcript_variant,missense_variant,non_coding_transcript_variant,coding_sequence_variant   |
| rs1485159955 | intron_variant                                                                                               |
| rs1485164082 | genic_upstream_transcript_variant,intron_variant                                                             |
| rs1485192946 | genic_downstream_transcript_variant,intron_variant                                                           |
| rs1485195354 | genic_upstream_transcript_variant,intron_variant                                                             |
| rs1485249108 | genic_downstream_transcript_variant,non_coding_transcript_variant,3_prime_UTR_variant                        |
| rs1485294106 | intron_variant                                                                                               |
| rs1485296990 | genic_upstream_transcript_variant,intron_variant                                                             |
| rs1485304834 | genic_upstream_transcript_variant,intron_variant                                                             |
| rs1485305255 | genic_downstream_transcript_variant,intron_variant                                                           |
| rs1485375712 | genic_upstream_transcript_variant,intron_variant                                                             |
| rs1485377537 | genic_upstream_transcript_variant,intron_variant                                                             |
| rs1485442575 | intron_variant                                                                                               |
| rs1485446369 | intron_variant                                                                                               |
| rs1485456789 | intron_variant                                                                                               |
| rs1485458008 | genic_upstream_transcript_variant,intron_variant                                                             |
| rs1485468643 | genic_upstream_transcript_variant,intron_variant                                                             |
| rs1485473904 | intron_variant                                                                                               |
| rs1485501492 | genic_downstream_transcript_variant,intron_variant                                                           |
| rs1485525072 | genic_upstream_transcript_variant,intron_variant                                                             |
| rs1485548871 | genic_upstream_transcript_variant,intron_variant                                                             |
| rs1485554043 | intron_variant                                                                                               |
| rs1485554731 | genic_upstream_transcript_variant,intron_variant                                                             |
| rs1485644444 | genic_downstream_transcript_variant,non_coding_transcript_variant,3_prime_UTR_variant                        |
| rs1485666145 | genic_upstream_transcript_variant,intron_variant                                                             |
| rs1485683999 | intron_variant                                                                                               |
| rs1485695046 | genic_upstream_transcript_variant,intron_variant                                                             |
| rs1485712615 | genic_upstream_transcript_variant,intron_variant                                                             |
| rs1485732821 | genic_upstream_transcript_variant,intron_variant                                                             |
| rs1485770040 | genic_upstream_transcript_variant,intron_variant                                                             |
| rs1485771696 | genic_upstream_transcript_variant,intron_variant                                                             |
| rs1485797167 | genic_upstream_transcript_variant,intron_variant                                                             |

|              |                                                                                                                         |
|--------------|-------------------------------------------------------------------------------------------------------------------------|
| rs1485825339 | genic_upstream_transcript_variant,intron_variant                                                                        |
| rs1485849146 | genic_upstream_transcript_variant,intron_variant                                                                        |
| rs1485850067 | genic_downstream_transcript_variant,intron_variant                                                                      |
| rs1485891606 | missense_variant,non_coding_transcript_variant,coding_sequence_variant                                                  |
| rs1485918578 | intron_variant                                                                                                          |
| rs1485957399 | intron_variant                                                                                                          |
| rs1485957477 | intron_variant                                                                                                          |
| rs1485967265 | intron_variant                                                                                                          |
| rs1485988100 | genic_upstream_transcript_variant,intron_variant                                                                        |
| rs1486002520 | genic_upstream_transcript_variant,intron_variant                                                                        |
| rs1486006809 | intron_variant                                                                                                          |
| rs1486026021 | genic_downstream_transcript_variant,intron_variant                                                                      |
| rs1486029629 | genic_upstream_transcript_variant,intron_variant                                                                        |
| rs1486081428 | intron_variant                                                                                                          |
| rs1486141035 | intron_variant                                                                                                          |
| rs1486183446 | intron_variant                                                                                                          |
| rs1486187704 | non_coding_transcript_variant,coding_sequence_variant,intron_variant,genic_upstream_transcript_variant,missense_variant |
| rs1486200433 | genic_upstream_transcript_variant,intron_variant                                                                        |
| rs1486213925 | intron_variant                                                                                                          |
| rs1486220479 | genic_upstream_transcript_variant,intron_variant                                                                        |
| rs1486250433 | genic_upstream_transcript_variant,intron_variant                                                                        |
| rs1486265593 | genic_upstream_transcript_variant,intron_variant                                                                        |
| rs1486289504 | genic_downstream_transcript_variant,intron_variant                                                                      |
| rs1486293799 | genic_downstream_transcript_variant,non_coding_transcript_variant,3_prime_UTR_variant                                   |
| rs1486294607 | genic_upstream_transcript_variant,intron_variant                                                                        |
| rs1486325271 | genic_upstream_transcript_variant,intron_variant                                                                        |
| rs1486326736 | genic_upstream_transcript_variant,intron_variant                                                                        |
| rs1486343767 | genic_downstream_transcript_variant,intron_variant                                                                      |
| rs1486406169 | genic_upstream_transcript_variant,intron_variant                                                                        |
| rs1486415695 | genic_upstream_transcript_variant,upstream_transcript_variant,intron_variant,2KB_upstream_variant                       |
| rs1486418391 | genic_downstream_transcript_variant,intron_variant                                                                      |
| rs1486435271 | genic_downstream_transcript_variant,intron_variant                                                                      |
| rs1486444216 | genic_upstream_transcript_variant,intron_variant                                                                        |
| rs1486505250 | intron_variant                                                                                                          |
| rs1486514176 | intron_variant                                                                                                          |
| rs1486526150 | genic_upstream_transcript_variant,intron_variant                                                                        |
| rs1486594566 | genic_upstream_transcript_variant,intron_variant                                                                        |
| rs1486638297 | intron_variant                                                                                                          |
| rs1486639307 | genic_upstream_transcript_variant,intron_variant                                                                        |
| rs1486676965 | intron_variant                                                                                                          |
| rs1486738970 | genic_upstream_transcript_variant,intron_variant                                                                        |
| rs1486748346 | genic_upstream_transcript_variant,intron_variant                                                                        |
| rs1486797401 | genic_upstream_transcript_variant,intron_variant                                                                        |
| rs1486811946 | intron_variant                                                                                                          |
| rs1486827646 | genic_downstream_transcript_variant,intron_variant                                                                      |
| rs1486860429 | genic_downstream_transcript_variant,intron_variant                                                                      |
| rs1486892295 | genic_downstream_transcript_variant,intron_variant                                                                      |
| rs1486901783 | intron_variant                                                                                                          |
| rs1486985704 | genic_downstream_transcript_variant,intron_variant                                                                      |
| rs1486995542 | genic_upstream_transcript_variant,upstream_transcript_variant,intron_variant,2KB_upstream_variant                       |
| rs1487027676 | genic_downstream_transcript_variant,intron_variant                                                                      |
| rs1487084701 | genic_upstream_transcript_variant,intron_variant                                                                        |
| rs1487118687 | genic_upstream_transcript_variant,intron_variant                                                                        |
| rs1487144303 | intron_variant                                                                                                          |
| rs1487148040 | genic_downstream_transcript_variant,intron_variant                                                                      |
| rs1487149931 | genic_downstream_transcript_variant,intron_variant                                                                      |
| rs1487161467 | genic_upstream_transcript_variant,intron_variant                                                                        |
| rs1487236608 | genic_downstream_transcript_variant,intron_variant                                                                      |
| rs1487292146 | non_coding_transcript_variant,coding_sequence_variant,synonymous_variant                                                |
| rs1487331990 | genic_upstream_transcript_variant,intron_variant                                                                        |
| rs1487375846 | genic_downstream_transcript_variant,intron_variant                                                                      |
| rs1487386232 | genic_upstream_transcript_variant,intron_variant                                                                        |
| rs1487401905 | intron_variant                                                                                                          |
| rs1487456192 | genic_upstream_transcript_variant,intron_variant                                                                        |
| rs1487466833 | genic_upstream_transcript_variant,intron_variant                                                                        |
| rs1487490849 | genic_downstream_transcript_variant,intron_variant                                                                      |
| rs1487528185 | genic_upstream_transcript_variant,intron_variant                                                                        |
| rs1487559453 | genic_upstream_transcript_variant,intron_variant                                                                        |
| rs1487595476 | genic_upstream_transcript_variant,intron_variant                                                                        |
| rs1487640889 | genic_upstream_transcript_variant,intron_variant                                                                        |
| rs1487666216 | genic_downstream_transcript_variant,intron_variant                                                                      |
| rs1487676944 | upstream_transcript_variant,genic_upstream_transcript_variant,intron_variant,2KB_upstream_variant                       |
| rs1487691757 | intron_variant                                                                                                          |
| rs1487699547 | genic_upstream_transcript_variant,intron_variant                                                                        |

|              |                                                                                                              |
|--------------|--------------------------------------------------------------------------------------------------------------|
| rs1487714050 | intron_variant                                                                                               |
| rs1487721453 | genic_upstream_transcript_variant,upstream_transcript_variant,intron_variant                                 |
| rs1487748127 | upstream_transcript_variant,genic_upstream_transcript_variant,intron_variant,2KB_upstream_variant            |
| rs1487779386 | intron_variant                                                                                               |
| rs1487839363 | intron_variant                                                                                               |
| rs1487920418 | genic_upstream_transcript_variant,intron_variant                                                             |
| rs1487959142 | genic_upstream_transcript_variant,upstream_transcript_variant,intron_variant                                 |
| rs1487974399 | intron_variant                                                                                               |
| rs1487995995 | intron_variant                                                                                               |
| rs1488031501 | genic_upstream_transcript_variant,intron_variant                                                             |
| rs1488070621 | genic_downstream_transcript_variant,intron_variant                                                           |
| rs1488087347 | genic_upstream_transcript_variant,intron_variant                                                             |
| rs1488102819 | genic_downstream_transcript_variant,intron_variant                                                           |
| rs1488110360 | genic_downstream_transcript_variant,intron_variant                                                           |
| rs1488111638 | genic_downstream_transcript_variant,intron_variant                                                           |
| rs1488126201 | intron_variant                                                                                               |
| rs1488182212 | intron_variant                                                                                               |
| rs1488211616 | missense_variant,non_coding_transcript_variant,coding_sequence_variant                                       |
| rs1488260179 | intron_variant                                                                                               |
| rs1488275528 | intron_variant                                                                                               |
| rs1488289029 | genic_upstream_transcript_variant,intron_variant                                                             |
| rs1488296990 | genic_upstream_transcript_variant,intron_variant                                                             |
| rs1488319546 | genic_downstream_transcript_variant,intron_variant                                                           |
| rs1488320755 | intron_variant                                                                                               |
| rs1488322291 | genic_downstream_transcript_variant,non_coding_transcript_variant,coding_sequence_variant,synonymous_variant |
| rs1488332951 | genic_upstream_transcript_variant,upstream_transcript_variant,intron_variant,2KB_upstream_variant            |
| rs1488332998 | genic_downstream_transcript_variant,non_coding_transcript_variant,coding_sequence_variant,synonymous_variant |
| rs1488348455 | genic_upstream_transcript_variant,intron_variant                                                             |
| rs1488355403 | intron_variant                                                                                               |
| rs1488416448 | genic_upstream_transcript_variant,intron_variant                                                             |
| rs1488461185 | intron_variant                                                                                               |
| rs1488496268 | genic_upstream_transcript_variant,intron_variant                                                             |
| rs1488526370 | intron_variant                                                                                               |
| rs1488556868 | intron_variant                                                                                               |
| rs1488564485 | genic_downstream_transcript_variant,intron_variant                                                           |
| rs1488677626 | genic_upstream_transcript_variant,intron_variant                                                             |
| rs1488732493 | genic_downstream_transcript_variant,intron_variant                                                           |
| rs1488772874 | intron_variant                                                                                               |
| rs1488784901 | genic_downstream_transcript_variant,intron_variant                                                           |
| rs1488940496 | genic_upstream_transcript_variant,intron_variant                                                             |
| rs1488941434 | genic_upstream_transcript_variant,upstream_transcript_variant,intron_variant                                 |
| rs1488977324 | genic_upstream_transcript_variant,intron_variant                                                             |
| rs1488984139 | genic_upstream_transcript_variant,upstream_transcript_variant,intron_variant,2KB_upstream_variant            |
| rs1488986790 | genic_downstream_transcript_variant,intron_variant                                                           |
| rs1488996959 | genic_downstream_transcript_variant,intron_variant                                                           |
| rs1489023588 | genic_upstream_transcript_variant,intron_variant                                                             |
| rs1489056306 | intron_variant                                                                                               |
| rs1489077118 | intron_variant                                                                                               |
| rs1489148201 | genic_upstream_transcript_variant,intron_variant                                                             |
| rs1489151494 | intron_variant                                                                                               |
| rs1489196782 | intron_variant,upstream_transcript_variant,genic_upstream_transcript_variant,5_prime_UTR_variant             |
| rs1489221263 | intron_variant                                                                                               |
| rs1489223290 | genic_upstream_transcript_variant,intron_variant                                                             |
| rs1489267774 | intron_variant                                                                                               |
| rs1489281067 | intron_variant                                                                                               |
| rs1489290055 | genic_upstream_transcript_variant,upstream_transcript_variant,intron_variant                                 |
| rs1489413308 | intron_variant                                                                                               |
| rs1489426486 | genic_upstream_transcript_variant,intron_variant                                                             |
| rs1489429146 | genic_upstream_transcript_variant,intron_variant                                                             |
| rs1489472611 | intron_variant                                                                                               |
| rs1489523164 | genic_upstream_transcript_variant,intron_variant                                                             |
| rs1489529728 | intron_variant                                                                                               |
| rs1489530780 | genic_upstream_transcript_variant,intron_variant                                                             |
| rs1489541755 | intron_variant                                                                                               |
| rs1489622764 | intron_variant                                                                                               |
| rs1489655456 | upstream_transcript_variant,genic_upstream_transcript_variant,intron_variant,2KB_upstream_variant            |
| rs1489667657 | intron_variant                                                                                               |
| rs1489704560 | genic_upstream_transcript_variant,intron_variant                                                             |
| rs1489753985 | intron_variant                                                                                               |
| rs1489759350 | genic_upstream_transcript_variant,intron_variant                                                             |
| rs1489785801 | intron_variant                                                                                               |
| rs1489802656 | genic_downstream_transcript_variant,intron_variant                                                           |
| rs1489815721 | intron_variant                                                                                               |
| rs1489822317 | intron_variant                                                                                               |

|              |                                                                                                                         |
|--------------|-------------------------------------------------------------------------------------------------------------------------|
| rs1489828270 | intron_variant                                                                                                          |
| rs1489861340 | genic_upstream_transcript_variant,intron_variant                                                                        |
| rs1489877229 | genic_downstream_transcript_variant,non_coding_transcript_variant,3_prime_UTR_variant                                   |
| rs1489878653 | intron_variant                                                                                                          |
| rs1489888731 | intron_variant                                                                                                          |
| rs1489931768 | genic_downstream_transcript_variant,non_coding_transcript_variant,3_prime_UTR_variant                                   |
| rs1489946351 | missense_variant,non_coding_transcript_variant,coding_sequence_variant,5_prime_UTR_variant                              |
| rs1489948003 | genic_upstream_transcript_variant,intron_variant                                                                        |
| rs1489963596 | intron_variant                                                                                                          |
| rs1489970758 | genic_upstream_transcript_variant,intron_variant                                                                        |
| rs1489985110 | genic_downstream_transcript_variant,non_coding_transcript_variant,3_prime_UTR_variant                                   |
| rs1490057524 | genic_downstream_transcript_variant,intron_variant                                                                      |
| rs1490098958 | genic_downstream_transcript_variant,intron_variant                                                                      |
| rs1490106004 | intron_variant                                                                                                          |
| rs1490136874 | intron_variant                                                                                                          |
| rs1490167478 | intron_variant                                                                                                          |
| rs1490205154 | intron_variant                                                                                                          |
| rs1490267005 | genic_upstream_transcript_variant,intron_variant                                                                        |
| rs1490305096 | genic_downstream_transcript_variant,intron_variant                                                                      |
| rs1490327083 | intron_variant                                                                                                          |
| rs1490355177 | intron_variant                                                                                                          |
| rs1490367520 | intron_variant                                                                                                          |
| rs1490378773 | genic_downstream_transcript_variant,intron_variant                                                                      |
| rs1490380382 | intron_variant                                                                                                          |
| rs1490389467 | genic_upstream_transcript_variant,intron_variant                                                                        |
| rs1490424505 | genic_downstream_transcript_variant,intron_variant                                                                      |
| rs1490432889 | intron_variant,5_prime_UTR_variant                                                                                      |
| rs1490460158 | genic_upstream_transcript_variant,intron_variant                                                                        |
| rs1490469428 | genic_upstream_transcript_variant,intron_variant                                                                        |
| rs1490493501 | intron_variant                                                                                                          |
| rs1490502361 | genic_upstream_transcript_variant,intron_variant                                                                        |
| rs1490503554 | genic_downstream_transcript_variant,intron_variant                                                                      |
| rs1490548078 | intron_variant                                                                                                          |
| rs1490584480 | genic_downstream_transcript_variant,intron_variant                                                                      |
| rs1490643773 | intron_variant                                                                                                          |
| rs1490648488 | non_coding_transcript_variant,coding_sequence_variant,intron_variant,genic_upstream_transcript_variant,missense_variant |
| rs1490689992 | genic_upstream_transcript_variant,intron_variant                                                                        |
| rs1490692146 | genic_upstream_transcript_variant,upstream_transcript_variant,intron_variant                                            |
| rs1490747391 | genic_upstream_transcript_variant,intron_variant                                                                        |
| rs1490777570 | genic_downstream_transcript_variant,intron_variant                                                                      |
| rs1490779561 | intron_variant                                                                                                          |
| rs1490801483 | genic_downstream_transcript_variant,missense_variant,non_coding_transcript_variant,coding_sequence_variant              |
| rs1490812519 | genic_upstream_transcript_variant,intron_variant                                                                        |
| rs1490830596 | genic_upstream_transcript_variant,intron_variant                                                                        |
| rs1490873465 | downstream_transcript_variant,genic_downstream_transcript_variant,intron_variant                                        |
| rs1490881009 | genic_upstream_transcript_variant,intron_variant                                                                        |
| rs1490908032 | genic_upstream_transcript_variant,intron_variant                                                                        |
| rs1490914718 | intron_variant                                                                                                          |
| rs1490940194 | intron_variant                                                                                                          |
| rs1490959455 | genic_upstream_transcript_variant,intron_variant                                                                        |
| rs1490980598 | intron_variant                                                                                                          |
| rs1490992022 | genic_upstream_transcript_variant,intron_variant                                                                        |
| rs1490997489 | intron_variant                                                                                                          |
| rs1490998532 | intron_variant                                                                                                          |
| rs1491004001 | genic_upstream_transcript_variant,upstream_transcript_variant,intron_variant                                            |
| rs1491080305 | intron_variant                                                                                                          |
| rs1491183574 | genic_upstream_transcript_variant,intron_variant                                                                        |
| rs1491198455 | genic_upstream_transcript_variant,intron_variant                                                                        |
| rs1491236394 | intron_variant                                                                                                          |
| rs1491250836 | genic_upstream_transcript_variant,intron_variant                                                                        |
| rs1491263929 | intron_variant                                                                                                          |
| rs1491272300 | genic_upstream_transcript_variant,intron_variant                                                                        |
| rs1491272551 | genic_upstream_transcript_variant,intron_variant                                                                        |
| rs1491273986 | intron_variant                                                                                                          |
| rs1491325346 | genic_upstream_transcript_variant,intron_variant                                                                        |
| rs1491328304 | intron_variant                                                                                                          |
| rs1491332747 | intron_variant                                                                                                          |
| rs1491409307 | genic_upstream_transcript_variant,upstream_transcript_variant,intron_variant,2KB_upstream_variant                       |
| rs1491422628 | genic_upstream_transcript_variant,intron_variant                                                                        |
| rs1491477387 | intron_variant                                                                                                          |
| rs1491535985 | intron_variant                                                                                                          |
| rs1491556630 | genic_upstream_transcript_variant,intron_variant                                                                        |
| rs1554370467 | genic_upstream_transcript_variant,upstream_transcript_variant,intron_variant,2KB_upstream_variant                       |
| rs1554371931 | intron_variant,non_coding_transcript_variant,genic_upstream_transcript_variant,5_prime_UTR_variant                      |

|              |                                                                                                   |
|--------------|---------------------------------------------------------------------------------------------------|
| rs1554373039 | genic_upstream_transcript_variant,intron_variant                                                  |
| rs1554374560 | genic_upstream_transcript_variant,intron_variant                                                  |
| rs1554375655 | upstream_transcript_variant,genic_upstream_transcript_variant,intron_variant,2KB_upstream_variant |
| rs1554382033 | genic_upstream_transcript_variant,intron_variant                                                  |
| rs1554382050 | genic_upstream_transcript_variant,intron_variant                                                  |
| rs1554382319 | genic_upstream_transcript_variant,intron_variant                                                  |
| rs1554382816 | genic_upstream_transcript_variant,intron_variant                                                  |
| rs1554382817 | genic_upstream_transcript_variant,intron_variant                                                  |
| rs1554382859 | genic_upstream_transcript_variant,intron_variant                                                  |
| rs1554383010 | genic_upstream_transcript_variant,intron_variant                                                  |
| rs1554383445 | genic_upstream_transcript_variant,intron_variant                                                  |
| rs1554383538 | genic_upstream_transcript_variant,intron_variant                                                  |
| rs1554385239 | genic_upstream_transcript_variant,intron_variant                                                  |
| rs1554386634 | splice_acceptor_variant,intron_variant                                                            |
| rs1554386858 | intron_variant                                                                                    |
| rs1554386877 | intron_variant                                                                                    |
| rs1554386898 | intron_variant                                                                                    |
| rs1554387050 | intron_variant                                                                                    |
| rs1554387069 | intron_variant                                                                                    |
| rs1554387086 | intron_variant                                                                                    |
| rs1554391274 | non_coding_transcript_variant,coding_sequence_variant,frameshift_variant                          |
| rs1554392227 | intron_variant                                                                                    |
| rs1554393535 | intron_variant                                                                                    |
| rs1554394689 | intron_variant                                                                                    |
| rs1554394700 | intron_variant                                                                                    |
| rs1554394709 | intron_variant                                                                                    |
| rs1554394720 | intron_variant                                                                                    |
| rs1554394721 | intron_variant                                                                                    |
| rs1554394727 | intron_variant                                                                                    |
| rs1554394731 | intron_variant                                                                                    |
| rs1554394775 | intron_variant                                                                                    |
| rs1554394801 | intron_variant                                                                                    |
| rs1554394802 | intron_variant                                                                                    |
| rs1554394813 | intron_variant                                                                                    |
| rs1554394820 | intron_variant                                                                                    |
| rs1554394822 | intron_variant                                                                                    |
| rs1554394824 | intron_variant                                                                                    |
| rs1554394838 | intron_variant                                                                                    |
| rs1554394839 | intron_variant                                                                                    |
| rs1554397034 | intron_variant                                                                                    |
| rs1554397514 | intron_variant                                                                                    |
| rs1554397555 | intron_variant                                                                                    |
| rs1554397556 | intron_variant                                                                                    |
| rs1554398325 | genic_downstream_transcript_variant,intron_variant                                                |
| rs1554400829 | genic_downstream_transcript_variant,intron_variant                                                |
| rs1554402191 | genic_downstream_transcript_variant,intron_variant                                                |
| rs1562866405 | genic_upstream_transcript_variant,upstream_transcript_variant,2KB_upstream_variant,intron_variant |
| rs1562867126 | genic_upstream_transcript_variant,upstream_transcript_variant,2KB_upstream_variant,intron_variant |
| rs1562867391 | genic_upstream_transcript_variant,upstream_transcript_variant,2KB_upstream_variant,intron_variant |
| rs1562867911 | genic_upstream_transcript_variant,upstream_transcript_variant,2KB_upstream_variant,intron_variant |
| rs1562867920 | genic_upstream_transcript_variant,upstream_transcript_variant,2KB_upstream_variant,intron_variant |
| rs1562868374 | genic_upstream_transcript_variant,upstream_transcript_variant,2KB_upstream_variant,intron_variant |
| rs1562868825 | genic_upstream_transcript_variant,intron_variant                                                  |
| rs1562868964 | genic_upstream_transcript_variant,intron_variant                                                  |
| rs1562868994 | genic_upstream_transcript_variant,intron_variant                                                  |
| rs1562869598 | genic_upstream_transcript_variant,intron_variant                                                  |
| rs1562869714 | genic_upstream_transcript_variant,intron_variant                                                  |
| rs1562869810 | genic_upstream_transcript_variant,intron_variant                                                  |
| rs1562869841 | genic_upstream_transcript_variant,intron_variant                                                  |
| rs1562869933 | genic_upstream_transcript_variant,intron_variant                                                  |
| rs1562870100 | genic_upstream_transcript_variant,intron_variant                                                  |
| rs1562870148 | genic_upstream_transcript_variant,intron_variant                                                  |
| rs1562870176 | genic_upstream_transcript_variant,intron_variant                                                  |
| rs1562870236 | genic_upstream_transcript_variant,intron_variant                                                  |
| rs1562870260 | genic_upstream_transcript_variant,intron_variant                                                  |
| rs1562870403 | genic_upstream_transcript_variant,intron_variant                                                  |
| rs1562870873 | genic_upstream_transcript_variant,intron_variant                                                  |
| rs1562871120 | genic_upstream_transcript_variant,intron_variant                                                  |
| rs1562871181 | genic_upstream_transcript_variant,intron_variant                                                  |
| rs1562871480 | genic_upstream_transcript_variant,intron_variant                                                  |
| rs1562871800 | genic_upstream_transcript_variant,intron_variant                                                  |
| rs1562872000 | genic_upstream_transcript_variant,intron_variant                                                  |
| rs1562872014 | genic_upstream_transcript_variant,intron_variant                                                  |
| rs1562872029 | genic_upstream_transcript_variant,intron_variant                                                  |







|              |                |
|--------------|----------------|
| rs1562900906 | intron_variant |
| rs1562900955 | intron_variant |
| rs1562901126 | intron_variant |
| rs1562901222 | intron_variant |
| rs1562901383 | intron_variant |
| rs1562901534 | intron_variant |
| rs1562901713 | intron_variant |
| rs1562901784 | intron_variant |
| rs1562901805 | intron_variant |
| rs1562902229 | intron_variant |
| rs1562902310 | intron_variant |
| rs1562902628 | intron_variant |
| rs1562902858 | intron_variant |
| rs1562903048 | intron_variant |
| rs1562903059 | intron_variant |
| rs1562903156 | intron_variant |
| rs1562903209 | intron_variant |
| rs1562903360 | intron_variant |
| rs1562903420 | intron_variant |
| rs1562904008 | intron_variant |
| rs1562904406 | intron_variant |
| rs1562904581 | intron_variant |
| rs1562904757 | intron_variant |
| rs1562905068 | intron_variant |
| rs1562905306 | intron_variant |
| rs1562905343 | intron_variant |
| rs1562905348 | intron_variant |
| rs1562906008 | intron_variant |
| rs1562906302 | intron_variant |
| rs1562906342 | intron_variant |
| rs1562906651 | intron_variant |
| rs1562906807 | intron_variant |
| rs1562906933 | intron_variant |
| rs1562907636 | intron_variant |
| rs1562907652 | intron_variant |
| rs1562907696 | intron_variant |
| rs1562907804 | intron_variant |
| rs1562908955 | intron_variant |
| rs1562909033 | intron_variant |
| rs1562909039 | intron_variant |
| rs1562909309 | intron_variant |
| rs1562909383 | intron_variant |
| rs1562909812 | intron_variant |
| rs1562909857 | intron_variant |
| rs1562910451 | intron_variant |
| rs1562910687 | intron_variant |
| rs1562910964 | intron_variant |
| rs1562911011 | intron_variant |
| rs1562911360 | intron_variant |
| rs1562911422 | intron_variant |
| rs1562911438 | intron_variant |
| rs1562911631 | intron_variant |
| rs1562911655 | intron_variant |
| rs1562912049 | intron_variant |
| rs1562912280 | intron_variant |
| rs1562912590 | intron_variant |
| rs1562912594 | intron_variant |
| rs1562912769 | intron_variant |
| rs1562912865 | intron_variant |
| rs1562913003 | intron_variant |
| rs1562913521 | intron_variant |
| rs1562913803 | intron_variant |
| rs1562914022 | intron_variant |
| rs1562914209 | intron_variant |
| rs1562914271 | intron_variant |
| rs1562914552 | intron_variant |
| rs1562914675 | intron_variant |
| rs1562914685 | intron_variant |
| rs1562914841 | intron_variant |
| rs1562915243 | intron_variant |
| rs1562915466 | intron_variant |
| rs1562915597 | intron_variant |
| rs1562915794 | intron_variant |
| rs1562915829 | intron_variant |

|              |                                                                          |
|--------------|--------------------------------------------------------------------------|
| rs1562916358 | intron_variant                                                           |
| rs1562916431 | intron_variant                                                           |
| rs1562916788 | intron_variant                                                           |
| rs1562917125 | intron_variant                                                           |
| rs1562917328 | intron_variant                                                           |
| rs1562917586 | intron_variant                                                           |
| rs1562917648 | intron_variant                                                           |
| rs1562917680 | intron_variant                                                           |
| rs1562917743 | intron_variant                                                           |
| rs1562917788 | intron_variant                                                           |
| rs1562917790 | intron_variant                                                           |
| rs1562917854 | intron_variant                                                           |
| rs1562917867 | intron_variant                                                           |
| rs1562917974 | intron_variant                                                           |
| rs1562918093 | intron_variant                                                           |
| rs1562918197 | intron_variant                                                           |
| rs1562918213 | intron_variant                                                           |
| rs1562918566 | intron_variant                                                           |
| rs1562918762 | intron_variant                                                           |
| rs1562918975 | intron_variant                                                           |
| rs1562919034 | intron_variant                                                           |
| rs1562919386 | intron_variant                                                           |
| rs1562919517 | intron_variant                                                           |
| rs1562919559 | intron_variant                                                           |
| rs1562919602 | intron_variant                                                           |
| rs1562919610 | intron_variant                                                           |
| rs1562919625 | intron_variant                                                           |
| rs1562919640 | intron_variant                                                           |
| rs1562919689 | intron_variant                                                           |
| rs1562919738 | intron_variant                                                           |
| rs1562919804 | intron_variant                                                           |
| rs1562919894 | intron_variant                                                           |
| rs1562919896 | intron_variant                                                           |
| rs1562920030 | intron_variant                                                           |
| rs1562920036 | intron_variant                                                           |
| rs1562920128 | intron_variant                                                           |
| rs1562920359 | synonymous_variant,coding_sequence_variant,non_coding_transcript_variant |
| rs1562920677 | intron_variant                                                           |
| rs1562921050 | intron_variant                                                           |
| rs1562921094 | intron_variant                                                           |
| rs1562921431 | intron_variant                                                           |
| rs1562921499 | intron_variant                                                           |
| rs1562921911 | intron_variant                                                           |
| rs1562921924 | intron_variant                                                           |
| rs1562922022 | missense_variant,coding_sequence_variant,non_coding_transcript_variant   |
| rs1562922253 | missense_variant,coding_sequence_variant,non_coding_transcript_variant   |
| rs1562922669 | intron_variant                                                           |
| rs1562923703 | intron_variant                                                           |
| rs1562923792 | intron_variant                                                           |
| rs1562923819 | intron_variant                                                           |
| rs1562924533 | intron_variant                                                           |
| rs1562924669 | intron_variant                                                           |
| rs1562924727 | intron_variant                                                           |
| rs1562924831 | intron_variant                                                           |
| rs1562924868 | intron_variant                                                           |
| rs1562925061 | intron_variant                                                           |
| rs1562925134 | intron_variant                                                           |
| rs1562926029 | intron_variant                                                           |
| rs1562926053 | intron_variant                                                           |
| rs1562926113 | intron_variant                                                           |
| rs1562926295 | intron_variant                                                           |
| rs1562926307 | intron_variant                                                           |
| rs1562926461 | intron_variant                                                           |
| rs1562926627 | intron_variant                                                           |
| rs1562926678 | intron_variant                                                           |
| rs1562926751 | intron_variant                                                           |
| rs1562926885 | intron_variant                                                           |
| rs1562926945 | intron_variant                                                           |
| rs1562926979 | intron_variant                                                           |
| rs1562927052 | intron_variant                                                           |
| rs1562927065 | intron_variant                                                           |
| rs1562927169 | intron_variant                                                           |
| rs1562927440 | intron_variant                                                           |
| rs1562927465 | intron_variant                                                           |



















|              |                                                                                            |
|--------------|--------------------------------------------------------------------------------------------|
| rs1584907910 | intron_variant                                                                             |
| rs1584907935 | intron_variant                                                                             |
| rs1584908047 | intron_variant                                                                             |
| rs1584908061 | intron_variant                                                                             |
| rs1584908066 | intron_variant                                                                             |
| rs1584908080 | intron_variant                                                                             |
| rs1584908105 | intron_variant                                                                             |
| rs1584908141 | intron_variant                                                                             |
| rs1584908219 | intron_variant                                                                             |
| rs1584908366 | intron_variant                                                                             |
| rs1584908457 | intron_variant                                                                             |
| rs1584908468 | intron_variant                                                                             |
| rs1584908508 | intron_variant                                                                             |
| rs1584908557 | intron_variant                                                                             |
| rs1584908988 | intron_variant                                                                             |
| rs1584908996 | intron_variant                                                                             |
| rs1584909029 | intron_variant                                                                             |
| rs1584909160 | intron_variant                                                                             |
| rs1584909266 | intron_variant                                                                             |
| rs1584909293 | intron_variant                                                                             |
| rs1584909496 | intron_variant                                                                             |
| rs1584909735 | intron_variant                                                                             |
| rs1584909773 | intron_variant                                                                             |
| rs1584909883 | intron_variant                                                                             |
| rs1584910158 | intron_variant                                                                             |
| rs1584910513 | intron_variant                                                                             |
| rs1584910586 | intron_variant                                                                             |
| rs1584910674 | intron_variant                                                                             |
| rs1584910749 | intron_variant                                                                             |
| rs1584910815 | intron_variant                                                                             |
| rs1584910833 | intron_variant                                                                             |
| rs1584910998 | intron_variant                                                                             |
| rs1584911047 | intron_variant                                                                             |
| rs1584911106 | intron_variant                                                                             |
| rs1584911152 | intron_variant                                                                             |
| rs1584911308 | intron_variant                                                                             |
| rs1584911329 | intron_variant                                                                             |
| rs1584911357 | intron_variant                                                                             |
| rs1584911514 | intron_variant                                                                             |
| rs1584911580 | intron_variant                                                                             |
| rs1584911924 | intron_variant                                                                             |
| rs1584912078 | intron_variant                                                                             |
| rs1584912123 | intron_variant                                                                             |
| rs1584912170 | intron_variant                                                                             |
| rs1584912209 | intron_variant                                                                             |
| rs1584912324 | intron_variant                                                                             |
| rs1584912502 | intron_variant                                                                             |
| rs1584912540 | intron_variant                                                                             |
| rs1584912675 | intron_variant                                                                             |
| rs1584912718 | intron_variant                                                                             |
| rs1584912740 | intron_variant                                                                             |
| rs1584912771 | intron_variant                                                                             |
| rs1584912774 | intron_variant                                                                             |
| rs1584912784 | intron_variant                                                                             |
| rs1584913105 | intron_variant                                                                             |
| rs1584913367 | intron_variant                                                                             |
| rs1584913501 | intron_variant                                                                             |
| rs1584913590 | intron_variant                                                                             |
| rs1584913605 | intron_variant                                                                             |
| rs1584913702 | intron_variant                                                                             |
| rs1584914083 | non_coding_transcript_variant,5_prime_UTR_variant,coding_sequence_variant,missense_variant |
| rs1584914352 | non_coding_transcript_variant,coding_sequence_variant,missense_variant                     |
| rs1584915468 | intron_variant                                                                             |
| rs1584915494 | intron_variant                                                                             |
| rs1584915689 | intron_variant                                                                             |
| rs1584915709 | intron_variant                                                                             |
| rs1584915813 | intron_variant                                                                             |
| rs1584915831 | intron_variant                                                                             |
| rs1584916231 | intron_variant                                                                             |
| rs1584916396 | intron_variant                                                                             |
| rs1584916414 | intron_variant                                                                             |
| rs1584916523 | intron_variant                                                                             |
| rs1584916589 | intron_variant                                                                             |
| rs1584916652 | intron_variant                                                                             |

|              |                                                                          |
|--------------|--------------------------------------------------------------------------|
| rs1584916715 | intron_variant                                                           |
| rs1584916762 | intron_variant                                                           |
| rs1584916766 | intron_variant                                                           |
| rs1584916778 | intron_variant                                                           |
| rs1584916927 | intron_variant                                                           |
| rs1584917071 | intron_variant                                                           |
| rs1584917082 | intron_variant                                                           |
| rs1584917181 | intron_variant                                                           |
| rs1584917356 | intron_variant                                                           |
| rs1584917476 | intron_variant                                                           |
| rs1584917547 | intron_variant                                                           |
| rs1584917558 | intron_variant                                                           |
| rs1584917631 | intron_variant                                                           |
| rs1584917674 | intron_variant                                                           |
| rs1584917721 | intron_variant                                                           |
| rs1584917737 | intron_variant                                                           |
| rs1584917932 | intron_variant                                                           |
| rs1584917987 | intron_variant                                                           |
| rs1584918099 | intron_variant                                                           |
| rs1584918125 | intron_variant                                                           |
| rs1584918161 | intron_variant                                                           |
| rs1584918167 | intron_variant                                                           |
| rs1584918238 | intron_variant                                                           |
| rs1584918320 | intron_variant                                                           |
| rs1584918343 | intron_variant                                                           |
| rs1584918549 | intron_variant                                                           |
| rs1584918804 | intron_variant                                                           |
| rs1584918830 | intron_variant                                                           |
| rs1584919061 | intron_variant                                                           |
| rs1584919293 | intron_variant                                                           |
| rs1584919302 | intron_variant                                                           |
| rs1584919324 | intron_variant                                                           |
| rs1584919380 | intron_variant                                                           |
| rs1584919467 | intron_variant                                                           |
| rs1584919474 | intron_variant                                                           |
| rs1584919500 | intron_variant                                                           |
| rs1584919560 | intron_variant                                                           |
| rs1584919626 | intron_variant                                                           |
| rs1584919840 | intron_variant                                                           |
| rs1584920331 | intron_variant                                                           |
| rs1584920334 | intron_variant                                                           |
| rs1584920456 | intron_variant                                                           |
| rs1584920606 | intron_variant                                                           |
| rs1584920676 | intron_variant                                                           |
| rs1584920701 | intron_variant                                                           |
| rs1584920846 | intron_variant                                                           |
| rs1584920910 | intron_variant                                                           |
| rs1584920951 | intron_variant                                                           |
| rs1584921175 | intron_variant                                                           |
| rs1584921254 | intron_variant                                                           |
| rs1584921370 | intron_variant                                                           |
| rs1584921403 | intron_variant                                                           |
| rs1584921441 | intron_variant                                                           |
| rs1584921531 | intron_variant                                                           |
| rs1584921636 | intron_variant                                                           |
| rs1584921698 | intron_variant                                                           |
| rs1584922248 | splice_donor_variant                                                     |
| rs1584922544 | intron_variant                                                           |
| rs1584922594 | intron_variant                                                           |
| rs1584922941 | intron_variant                                                           |
| rs1584923252 | non_coding_transcript_variant,inframe_indel,coding_sequence_variant      |
| rs1584923277 | non_coding_transcript_variant,frameshift_variant,coding_sequence_variant |
| rs1584923682 | intron_variant                                                           |
| rs1584923701 | intron_variant                                                           |
| rs1584923747 | intron_variant                                                           |
| rs1584923794 | intron_variant                                                           |
| rs1584924106 | intron_variant                                                           |
| rs1584924330 | intron_variant                                                           |
| rs1584924496 | intron_variant                                                           |
| rs1584924511 | intron_variant                                                           |
| rs1584924572 | intron_variant                                                           |
| rs1584924723 | intron_variant                                                           |
| rs1584924907 | intron_variant                                                           |
| rs1584925202 | intron_variant                                                           |

|              |                |
|--------------|----------------|
| rs1584925248 | intron_variant |
| rs1584925302 | intron_variant |
| rs1584925457 | intron_variant |
| rs1584925724 | intron_variant |
| rs1584925749 | intron_variant |
| rs1584925880 | intron_variant |
| rs1584925901 | intron_variant |
| rs1584926141 | intron_variant |
| rs1584926179 | intron_variant |
| rs1584926295 | intron_variant |
| rs1584926304 | intron_variant |
| rs1584926470 | intron_variant |
| rs1584926499 | intron_variant |
| rs1584926632 | intron_variant |
| rs1584927086 | intron_variant |
| rs1584927158 | intron_variant |
| rs1584927163 | intron_variant |
| rs1584927350 | intron_variant |
| rs1584927491 | intron_variant |
| rs1584927514 | intron_variant |
| rs1584927589 | intron_variant |
| rs1584927643 | intron_variant |
| rs1584927720 | intron_variant |
| rs1584927750 | intron_variant |
| rs1584928042 | intron_variant |
| rs1584928247 | intron_variant |
| rs1584928318 | intron_variant |
| rs1584928355 | intron_variant |
| rs1584928496 | intron_variant |
| rs1584928605 | intron_variant |
| rs1584928811 | intron_variant |
| rs1584928946 | intron_variant |
| rs1584929012 | intron_variant |
| rs1584929078 | intron_variant |
| rs1584929287 | intron_variant |
| rs1584929301 | intron_variant |
| rs1584929327 | intron_variant |
| rs1584929344 | intron_variant |
| rs1584929356 | intron_variant |
| rs1584929361 | intron_variant |
| rs1584929560 | intron_variant |
| rs1584929635 | intron_variant |
| rs1584929758 | intron_variant |
| rs1584929815 | intron_variant |
| rs1584929835 | intron_variant |
| rs1584930019 | intron_variant |
| rs1584930049 | intron_variant |
| rs1584930169 | intron_variant |
| rs1584930393 | intron_variant |
| rs1584930551 | intron_variant |
| rs1584930874 | intron_variant |
| rs1584930923 | intron_variant |
| rs1584931002 | intron_variant |
| rs1584931010 | intron_variant |
| rs1584931014 | intron_variant |
| rs1584931126 | intron_variant |
| rs1584931386 | intron_variant |
| rs1584931538 | intron_variant |
| rs1584931774 | intron_variant |
| rs1584931956 | intron_variant |
| rs1584931961 | intron_variant |
| rs1584932035 | intron_variant |
| rs1584932208 | intron_variant |
| rs1584932228 | intron_variant |
| rs1584932234 | intron_variant |
| rs1584932243 | intron_variant |
| rs1584932246 | intron_variant |
| rs1584932445 | intron_variant |
| rs1584932602 | intron_variant |
| rs1584932817 | intron_variant |
| rs1584932829 | intron_variant |
| rs1584932887 | intron_variant |
| rs1584932937 | intron_variant |
| rs1584932968 | intron_variant |

|              |                |
|--------------|----------------|
| rs1584933065 | intron_variant |
| rs1584933084 | intron_variant |
| rs1584933116 | intron_variant |
| rs1584933166 | intron_variant |
| rs1584933169 | intron_variant |
| rs1584933638 | intron_variant |
| rs1584933755 | intron_variant |
| rs1584933780 | intron_variant |
| rs1584933806 | intron_variant |
| rs1584933862 | intron_variant |
| rs1584933993 | intron_variant |
| rs1584934004 | intron_variant |
| rs1584934092 | intron_variant |
| rs1584934099 | intron_variant |
| rs1584934136 | intron_variant |
| rs1584934361 | intron_variant |
| rs1584934460 | intron_variant |
| rs1584934480 | intron_variant |
| rs1584934499 | intron_variant |
| rs1584934508 | intron_variant |
| rs1584934526 | intron_variant |
| rs1584934534 | intron_variant |
| rs1584934556 | intron_variant |
| rs1584934786 | intron_variant |
| rs1584934821 | intron_variant |
| rs1584934938 | intron_variant |
| rs1584934971 | intron_variant |
| rs1584934979 | intron_variant |
| rs1584934998 | intron_variant |
| rs1584935002 | intron_variant |
| rs1584935158 | intron_variant |
| rs1584935226 | intron_variant |
| rs1584935230 | intron_variant |
| rs1584935377 | intron_variant |
| rs1584935601 | intron_variant |
| rs1584935682 | intron_variant |
| rs1584935785 | intron_variant |
| rs1584935845 | intron_variant |
| rs1584936017 | intron_variant |
| rs1584936070 | intron_variant |
| rs1584936262 | intron_variant |
| rs1584936349 | intron_variant |
| rs1584936462 | intron_variant |
| rs1584936498 | intron_variant |
| rs1584936859 | intron_variant |
| rs1584936992 | intron_variant |
| rs1584937022 | intron_variant |
| rs1584937032 | intron_variant |
| rs1584937132 | intron_variant |
| rs1584937148 | intron_variant |
| rs1584937263 | intron_variant |
| rs1584937287 | intron_variant |
| rs1584937304 | intron_variant |
| rs1584937328 | intron_variant |
| rs1584937359 | intron_variant |
| rs1584937420 | intron_variant |
| rs1584937493 | intron_variant |
| rs1584937504 | intron_variant |
| rs1584937551 | intron_variant |
| rs1584937784 | intron_variant |
| rs1584937998 | intron_variant |
| rs1584938226 | intron_variant |
| rs1584938269 | intron_variant |
| rs1584938352 | intron_variant |
| rs1584938398 | intron_variant |
| rs1584938415 | intron_variant |
| rs1584938785 | intron_variant |
| rs1584938817 | intron_variant |
| rs1584939376 | intron_variant |
| rs1584939390 | intron_variant |
| rs1584939403 | intron_variant |
| rs1584939580 | intron_variant |
| rs1584939596 | intron_variant |
| rs1584939762 | intron_variant |

|              |                                                                          |
|--------------|--------------------------------------------------------------------------|
| rs1584939949 | intron_variant                                                           |
| rs1584940397 | intron_variant                                                           |
| rs1584940765 | intron_variant                                                           |
| rs1584940807 | intron_variant                                                           |
| rs1584940904 | intron_variant                                                           |
| rs1584941072 | intron_variant                                                           |
| rs1584941399 | intron_variant                                                           |
| rs1584941706 | non_coding_transcript_variant,coding_sequence_variant,missense_variant   |
| rs1584941722 | non_coding_transcript_variant,synonymous_variant,coding_sequence_variant |
| rs1584942154 | intron_variant                                                           |
| rs1584942168 | intron_variant                                                           |
| rs1584942436 | intron_variant                                                           |
| rs1584942727 | non_coding_transcript_variant,synonymous_variant,coding_sequence_variant |
| rs1584943119 | intron_variant                                                           |
| rs1584943187 | intron_variant                                                           |
| rs1584943266 | intron_variant                                                           |
| rs1584943308 | intron_variant                                                           |
| rs1584943661 | missense_variant,intron_variant,coding_sequence_variant                  |
| rs1584943686 | synonymous_variant,intron_variant,coding_sequence_variant                |
| rs1584944191 | intron_variant                                                           |
| rs1584944213 | intron_variant                                                           |
| rs1584944357 | intron_variant                                                           |
| rs1584944815 | intron_variant                                                           |
| rs1584944871 | intron_variant                                                           |
| rs1584945169 | intron_variant                                                           |
| rs1584945240 | intron_variant                                                           |
| rs1584945253 | intron_variant                                                           |
| rs1584945336 | intron_variant                                                           |
| rs1584945362 | intron_variant                                                           |
| rs1584945407 | intron_variant                                                           |
| rs1584945419 | intron_variant                                                           |
| rs1584945466 | intron_variant                                                           |
| rs1584945471 | intron_variant                                                           |
| rs1584945497 | intron_variant                                                           |
| rs1584945552 | intron_variant                                                           |
| rs1584945579 | intron_variant                                                           |
| rs1584945626 | intron_variant                                                           |
| rs1584945708 | intron_variant                                                           |
| rs1584945798 | intron_variant                                                           |
| rs1584945938 | intron_variant                                                           |
| rs1584945972 | intron_variant                                                           |
| rs1584946365 | intron_variant                                                           |
| rs1584946490 | intron_variant                                                           |
| rs1584946566 | intron_variant                                                           |
| rs1584947168 | non_coding_transcript_variant,synonymous_variant,coding_sequence_variant |
| rs1584947519 | intron_variant                                                           |
| rs1584947683 | intron_variant                                                           |
| rs1584948052 | intron_variant                                                           |
| rs1584948364 | intron_variant                                                           |
| rs1584948401 | intron_variant                                                           |
| rs1584948434 | intron_variant                                                           |
| rs1584948594 | intron_variant                                                           |
| rs1584948679 | intron_variant                                                           |
| rs1584948754 | intron_variant                                                           |
| rs1584948798 | intron_variant                                                           |
| rs1584948850 | intron_variant                                                           |
| rs1584948868 | intron_variant                                                           |
| rs1584948881 | intron_variant                                                           |
| rs1584948961 | intron_variant                                                           |
| rs1584948982 | intron_variant                                                           |
| rs1584948996 | intron_variant                                                           |
| rs1584949026 | intron_variant                                                           |
| rs1584949033 | intron_variant                                                           |
| rs1584949056 | intron_variant                                                           |
| rs1584949161 | intron_variant                                                           |
| rs1584949501 | intron_variant                                                           |
| rs1584949973 | intron_variant                                                           |
| rs1584950020 | intron_variant                                                           |
| rs1584950042 | intron_variant                                                           |
| rs1584950133 | intron_variant                                                           |
| rs1584950162 | intron_variant                                                           |
| rs1584950472 | intron_variant                                                           |
| rs1584950509 | intron_variant                                                           |
| rs1584950579 | intron_variant                                                           |

|              |                                                                                              |
|--------------|----------------------------------------------------------------------------------------------|
| rs1584950593 | intron_variant                                                                               |
| rs1584950634 | intron_variant                                                                               |
| rs1584950640 | intron_variant                                                                               |
| rs1584950685 | intron_variant                                                                               |
| rs1584950700 | intron_variant                                                                               |
| rs1584950725 | intron_variant                                                                               |
| rs1584950762 | intron_variant                                                                               |
| rs1584950776 | intron_variant                                                                               |
| rs1584950843 | intron_variant                                                                               |
| rs1584950994 | intron_variant                                                                               |
| rs1584951022 | intron_variant                                                                               |
| rs1584951093 | intron_variant                                                                               |
| rs1584951202 | intron_variant                                                                               |
| rs1584951321 | intron_variant                                                                               |
| rs1584951333 | intron_variant                                                                               |
| rs1584951356 | intron_variant                                                                               |
| rs1584951768 | intron_variant                                                                               |
| rs1584951782 | intron_variant                                                                               |
| rs1584951833 | intron_variant                                                                               |
| rs1584951915 | intron_variant                                                                               |
| rs1584952076 | intron_variant                                                                               |
| rs1584952135 | intron_variant                                                                               |
| rs1584952374 | intron_variant                                                                               |
| rs1584952493 | intron_variant                                                                               |
| rs1584952549 | intron_variant                                                                               |
| rs1584952560 | intron_variant                                                                               |
| rs1584952613 | intron_variant                                                                               |
| rs1584952685 | intron_variant                                                                               |
| rs1584952835 | intron_variant                                                                               |
| rs1584952840 | intron_variant                                                                               |
| rs1584953009 | intron_variant                                                                               |
| rs1584953099 | intron_variant                                                                               |
| rs1584953148 | non_coding_transcript_variant,splice_acceptor_variant,intron_variant,coding_sequence_variant |
| rs1584953779 | genic_downstream_transcript_variant,intron_variant,downstream_transcript_variant             |
| rs1584953834 | genic_downstream_transcript_variant,intron_variant,downstream_transcript_variant             |
| rs1584953940 | genic_downstream_transcript_variant,intron_variant,downstream_transcript_variant             |
| rs1584954106 | genic_downstream_transcript_variant,intron_variant                                           |
| rs1584954154 | genic_downstream_transcript_variant,intron_variant                                           |
| rs1584954252 | genic_downstream_transcript_variant,intron_variant                                           |
| rs1584954269 | genic_downstream_transcript_variant,intron_variant                                           |
| rs1584954309 | genic_downstream_transcript_variant,intron_variant                                           |
| rs1584954332 | genic_downstream_transcript_variant,intron_variant                                           |
| rs1584954591 | genic_downstream_transcript_variant,intron_variant                                           |
| rs1584954801 | genic_downstream_transcript_variant,intron_variant                                           |
| rs1584954822 | genic_downstream_transcript_variant,intron_variant                                           |
| rs1584955164 | genic_downstream_transcript_variant,intron_variant                                           |
| rs1584955564 | genic_downstream_transcript_variant,intron_variant                                           |
| rs1584955607 | genic_downstream_transcript_variant,intron_variant                                           |
| rs1584955693 | genic_downstream_transcript_variant,intron_variant                                           |
| rs1584955859 | genic_downstream_transcript_variant,intron_variant                                           |
| rs1584956027 | genic_downstream_transcript_variant,intron_variant                                           |
| rs1584956105 | genic_downstream_transcript_variant,intron_variant                                           |
| rs1584956141 | genic_downstream_transcript_variant,intron_variant                                           |
| rs1584956176 | genic_downstream_transcript_variant,intron_variant                                           |
| rs1584956261 | genic_downstream_transcript_variant,intron_variant                                           |
| rs1584956339 | genic_downstream_transcript_variant,intron_variant                                           |
| rs1584956342 | genic_downstream_transcript_variant,intron_variant                                           |
| rs1584956475 | genic_downstream_transcript_variant,intron_variant                                           |
| rs1584956623 | genic_downstream_transcript_variant,intron_variant                                           |
| rs1584956638 | genic_downstream_transcript_variant,intron_variant                                           |
| rs1584956668 | genic_downstream_transcript_variant,intron_variant                                           |
| rs1584956705 | genic_downstream_transcript_variant,intron_variant                                           |
| rs1584956714 | genic_downstream_transcript_variant,intron_variant                                           |
| rs1584956805 | genic_downstream_transcript_variant,intron_variant                                           |
| rs1584956831 | genic_downstream_transcript_variant,intron_variant                                           |
| rs1584956925 | genic_downstream_transcript_variant,intron_variant                                           |
| rs1584956956 | genic_downstream_transcript_variant,intron_variant                                           |
| rs1584956971 | genic_downstream_transcript_variant,intron_variant                                           |
| rs1584957057 | genic_downstream_transcript_variant,intron_variant                                           |
| rs1584957107 | genic_downstream_transcript_variant,intron_variant                                           |
| rs1584957136 | genic_downstream_transcript_variant,intron_variant                                           |
| rs1584957254 | genic_downstream_transcript_variant,intron_variant                                           |
| rs1584957268 | genic_downstream_transcript_variant,intron_variant                                           |
| rs1584957411 | genic_downstream_transcript_variant,intron_variant                                           |







|              |                                                                                                              |
|--------------|--------------------------------------------------------------------------------------------------------------|
| rs1584981085 | 500B_downstream_variant,downstream_transcript_variant                                                        |
| rs1584981095 | 500B_downstream_variant,downstream_transcript_variant                                                        |
| rs1584981125 | 500B_downstream_variant,downstream_transcript_variant                                                        |
| rs1584981129 | 500B_downstream_variant,downstream_transcript_variant                                                        |
| rs1645496432 | intron_variant                                                                                               |
| rs1645508828 | synonymous_variant,non_coding_transcript_variant,genic_downstream_transcript_variant,coding_sequence_variant |
| rs1646127058 | genic_upstream_transcript_variant,intron_variant                                                             |
| rs1646403099 | intron_variant                                                                                               |
| rs1646403177 | intron_variant                                                                                               |
| rs1646455636 | genic_downstream_transcript_variant,intron_variant                                                           |
| rs1646623252 | genic_downstream_transcript_variant,intron_variant                                                           |
| rs1647529618 | upstream_transcript_variant,genic_upstream_transcript_variant,2KB_upstream_variant,intron_variant            |
| rs1648874305 | genic_upstream_transcript_variant,intron_variant                                                             |
| rs1648946997 | intron_variant                                                                                               |
| rs1649526292 | genic_downstream_transcript_variant,intron_variant                                                           |
| rs1649849364 | intron_variant                                                                                               |
| rs1650133288 | intron_variant                                                                                               |
| rs1650392731 | intron_variant                                                                                               |
| rs1652523961 | genic_upstream_transcript_variant,intron_variant                                                             |
| rs1652648037 | intron_variant                                                                                               |
| rs1652827909 | intron_variant                                                                                               |
| rs1654489186 | genic_downstream_transcript_variant,intron_variant                                                           |
| rs1654988362 | genic_upstream_transcript_variant,intron_variant                                                             |
| rs1654994152 | intron_variant                                                                                               |
| rs1655095635 | intron_variant                                                                                               |
| rs1655275278 | genic_upstream_transcript_variant,intron_variant                                                             |
| rs1655304316 | genic_upstream_transcript_variant,intron_variant                                                             |
| rs1656492171 | genic_upstream_transcript_variant,intron_variant                                                             |
| rs1656840813 | intron_variant                                                                                               |
| rs1658404070 | genic_upstream_transcript_variant,intron_variant                                                             |
| rs1660551555 | genic_upstream_transcript_variant,intron_variant                                                             |
| rs1660843275 | genic_upstream_transcript_variant,intron_variant                                                             |
| rs1661046565 | genic_upstream_transcript_variant,intron_variant                                                             |
| rs1661652345 | intron_variant                                                                                               |
| rs1662524128 | genic_downstream_transcript_variant,intron_variant                                                           |
| rs1664007137 | genic_upstream_transcript_variant,intron_variant                                                             |
| rs1664365779 | genic_upstream_transcript_variant,intron_variant                                                             |
| rs1665271449 | genic_downstream_transcript_variant,intron_variant                                                           |
| rs1665508086 | intron_variant                                                                                               |
| rs1666941242 | genic_upstream_transcript_variant,intron_variant                                                             |
| rs1668055239 | genic_downstream_transcript_variant,intron_variant,downstream_transcript_variant                             |
| rs1669440686 | genic_downstream_transcript_variant,intron_variant                                                           |
| rs1669457827 | genic_upstream_transcript_variant,intron_variant                                                             |
| rs1672390373 | genic_upstream_transcript_variant,intron_variant                                                             |
| rs1672521299 | intron_variant                                                                                               |
| rs1674934575 | intron_variant                                                                                               |
| rs1676151911 | intron_variant                                                                                               |
| rs1678612564 | upstream_transcript_variant,genic_upstream_transcript_variant,2KB_upstream_variant,intron_variant            |
| rs1678767768 | genic_upstream_transcript_variant,intron_variant                                                             |
| rs1678867450 | genic_upstream_transcript_variant,intron_variant                                                             |
| rs1680382158 | intron_variant                                                                                               |
| rs1681108648 | intron_variant                                                                                               |
| rs1682060253 | intron_variant                                                                                               |
| rs1682765553 | genic_upstream_transcript_variant,intron_variant                                                             |
| rs1683695276 | genic_downstream_transcript_variant,intron_variant                                                           |
| rs1684242372 | intron_variant                                                                                               |
| rs1684361337 | genic_downstream_transcript_variant,intron_variant                                                           |
| rs1684524095 | intron_variant                                                                                               |
| rs1685693591 | intron_variant                                                                                               |
| rs1688397396 | genic_downstream_transcript_variant,intron_variant                                                           |
| rs1688606612 | genic_downstream_transcript_variant,intron_variant                                                           |
| rs1688744375 | intron_variant                                                                                               |
| rs1689030042 | genic_downstream_transcript_variant,intron_variant                                                           |
| rs1689179092 | genic_downstream_transcript_variant,intron_variant                                                           |
| rs1690406619 | genic_upstream_transcript_variant,intron_variant                                                             |
| rs1692328774 | genic_upstream_transcript_variant,intron_variant                                                             |
| rs1692773356 | genic_upstream_transcript_variant,intron_variant                                                             |
| rs1692922937 | genic_upstream_transcript_variant,intron_variant                                                             |
| rs1693598836 | genic_downstream_transcript_variant,intron_variant                                                           |
| rs1694388457 | intron_variant                                                                                               |
| rs1695231098 | intron_variant                                                                                               |
| rs1695512272 | genic_downstream_transcript_variant,intron_variant                                                           |
| rs1698847415 | genic_upstream_transcript_variant,intron_variant                                                             |
| rs1701447957 | genic_upstream_transcript_variant,intron_variant                                                             |

|              |                                                                                                   |
|--------------|---------------------------------------------------------------------------------------------------|
| rs1702912130 | intron_variant                                                                                    |
| rs1704008086 | intron_variant                                                                                    |
| rs1704970940 | genic_upstream_transcript_variant,intron_variant                                                  |
| rs1706963329 | genic_upstream_transcript_variant,intron_variant                                                  |
| rs1707201288 | upstream_transcript_variant,genic_upstream_transcript_variant,2KB_upstream_variant,intron_variant |
| rs1707959800 | intron_variant                                                                                    |
| rs1711772762 | genic_upstream_transcript_variant,intron_variant                                                  |
| rs1711960030 | intron_variant                                                                                    |
| rs1712019828 | genic_downstream_transcript_variant,intron_variant                                                |
| rs1712386071 | genic_upstream_transcript_variant,intron_variant                                                  |
| rs1712654787 | intron_variant                                                                                    |
| rs1712966987 | genic_downstream_transcript_variant,intron_variant                                                |
| rs1713589107 | genic_upstream_transcript_variant,intron_variant                                                  |
| rs1713771180 | genic_downstream_transcript_variant,intron_variant                                                |
| rs1714103615 | genic_downstream_transcript_variant,intron_variant                                                |
| rs1714591383 | genic_upstream_transcript_variant,intron_variant                                                  |
| rs1715363822 | genic_upstream_transcript_variant,intron_variant                                                  |
| rs1715634851 | intron_variant                                                                                    |
| rs1715673540 | intron_variant                                                                                    |
| rs1716371690 | genic_upstream_transcript_variant,intron_variant                                                  |
| rs1716850916 | genic_upstream_transcript_variant,intron_variant                                                  |
| rs1717986038 | genic_upstream_transcript_variant,intron_variant                                                  |
| rs1719152365 | genic_downstream_transcript_variant,intron_variant                                                |
| rs1719354080 | intron_variant                                                                                    |
| rs1720243676 | intron_variant                                                                                    |
| rs1720871472 | genic_downstream_transcript_variant,intron_variant                                                |
| rs1721073585 | intron_variant                                                                                    |
| rs1721362395 | intron_variant                                                                                    |
| rs1721467232 | genic_upstream_transcript_variant,intron_variant                                                  |
| rs1721487899 | genic_upstream_transcript_variant,intron_variant                                                  |
| rs1723085671 | genic_downstream_transcript_variant,intron_variant                                                |
| rs1724400632 | genic_upstream_transcript_variant,intron_variant                                                  |
| rs1725698487 | genic_downstream_transcript_variant,intron_variant                                                |
| rs1725943535 | intron_variant                                                                                    |
| rs1726082370 | intron_variant                                                                                    |
| rs1726108177 | intron_variant                                                                                    |
| rs1726763857 | genic_upstream_transcript_variant,intron_variant                                                  |
| rs1726872350 | genic_downstream_transcript_variant,intron_variant                                                |
| rs1727254617 | intron_variant                                                                                    |
| rs1727708968 | intron_variant                                                                                    |
| rs1727877907 | genic_downstream_transcript_variant,intron_variant                                                |
| rs1728885982 | genic_upstream_transcript_variant,intron_variant                                                  |
| rs1729115849 | genic_downstream_transcript_variant,intron_variant                                                |
| rs1729129984 | genic_downstream_transcript_variant,intron_variant                                                |
| rs1730323315 | genic_downstream_transcript_variant,intron_variant                                                |
| rs1730685847 | genic_downstream_transcript_variant,intron_variant                                                |
| rs1731289326 | intron_variant                                                                                    |
| rs1731334633 | genic_upstream_transcript_variant,intron_variant                                                  |
| rs1731659259 | intron_variant                                                                                    |
| rs1734273456 | intron_variant                                                                                    |
| rs1735402544 | genic_downstream_transcript_variant,intron_variant                                                |
| rs1736075344 | genic_downstream_transcript_variant,intron_variant                                                |
| rs1737516075 | genic_downstream_transcript_variant,intron_variant                                                |
| rs1738058012 | genic_upstream_transcript_variant,intron_variant                                                  |
| rs1738732277 | intron_variant                                                                                    |
| rs1740878901 | genic_upstream_transcript_variant,intron_variant                                                  |
| rs1741968136 | intron_variant                                                                                    |
| rs1742204166 | intron_variant                                                                                    |
| rs1743159624 | genic_downstream_transcript_variant,intron_variant                                                |
| rs1743672414 | genic_upstream_transcript_variant,intron_variant                                                  |
| rs1743806511 | intron_variant                                                                                    |
| rs1746726236 | intron_variant                                                                                    |
| rs1747290638 | intron_variant                                                                                    |
| rs1747426052 | genic_downstream_transcript_variant,intron_variant                                                |
| rs1748735219 | intron_variant                                                                                    |
| rs1749051112 | genic_downstream_transcript_variant,intron_variant                                                |
| rs1749556196 | genic_downstream_transcript_variant,intron_variant                                                |
| rs1749711852 | 3_prime_UTR_variant,non_coding_transcript_variant,genic_downstream_transcript_variant             |
| rs1750446163 | intron_variant                                                                                    |
| rs1750863753 | intron_variant                                                                                    |
| rs1752448925 | intron_variant                                                                                    |
| rs1752883917 | intron_variant                                                                                    |
| rs1752908905 | genic_upstream_transcript_variant,intron_variant                                                  |
| rs1753214477 | genic_downstream_transcript_variant,intron_variant                                                |

|              |                                                                                                                           |
|--------------|---------------------------------------------------------------------------------------------------------------------------|
| rs1753706571 | genic_downstream_transcript_variant,intron_variant                                                                        |
| rs1755422856 | intron_variant                                                                                                            |
| rs1757169023 | intron_variant                                                                                                            |
| rs1757600891 | genic_upstream_transcript_variant,intron_variant                                                                          |
| rs1759312246 | intron_variant                                                                                                            |
| rs1759371114 | genic_downstream_transcript_variant,intron_variant                                                                        |
| rs1760144555 | intron_variant                                                                                                            |
| rs1760609999 | intron_variant                                                                                                            |
| rs1760651316 | intron_variant                                                                                                            |
| rs1762287006 | intron_variant                                                                                                            |
| rs1762695209 | genic_downstream_transcript_variant,intron_variant,downstream_transcript_variant                                          |
| rs1763165100 | genic_upstream_transcript_variant,intron_variant                                                                          |
| rs1763506894 | upstream_transcript_variant,genic_upstream_transcript_variant,intron_variant                                              |
| rs1763614466 | genic_upstream_transcript_variant,intron_variant                                                                          |
| rs1763652746 | intron_variant                                                                                                            |
| rs1763652952 | intron_variant                                                                                                            |
| rs1764264355 | intron_variant                                                                                                            |
| rs1764636282 | genic_downstream_transcript_variant,intron_variant                                                                        |
| rs1764836666 | genic_downstream_transcript_variant,intron_variant                                                                        |
| rs1765944368 | genic_downstream_transcript_variant,intron_variant                                                                        |
| rs1765990862 | genic_upstream_transcript_variant,intron_variant                                                                          |
| rs1766653855 | intron_variant                                                                                                            |
| rs1767673479 | genic_upstream_transcript_variant,intron_variant                                                                          |
| rs1768033134 | genic_upstream_transcript_variant,intron_variant                                                                          |
| rs1769516371 | upstream_transcript_variant,genic_upstream_transcript_variant,2KB_upstream_variant,intron_variant                         |
| rs1771619509 | genic_downstream_transcript_variant,intron_variant                                                                        |
| rs1771911315 | genic_upstream_transcript_variant,intron_variant                                                                          |
| rs1772411131 | genic_upstream_transcript_variant,intron_variant                                                                          |
| rs1773477147 | genic_upstream_transcript_variant,intron_variant                                                                          |
| rs1773679224 | intron_variant                                                                                                            |
| rs1777664349 | genic_upstream_transcript_variant,intron_variant                                                                          |
| rs1779530026 | genic_upstream_transcript_variant,intron_variant                                                                          |
| rs1779826919 | intron_variant                                                                                                            |
| rs1781949106 | intron_variant                                                                                                            |
| rs1782077179 | genic_upstream_transcript_variant,intron_variant                                                                          |
| rs1783584590 | intron_variant                                                                                                            |
| rs1783939164 | genic_upstream_transcript_variant,intron_variant                                                                          |
| rs1784838145 | intron_variant                                                                                                            |
| rs1785742443 | genic_upstream_transcript_variant,intron_variant                                                                          |
| rs1786480671 | upstream_transcript_variant,intron_variant,genic_upstream_transcript_variant                                              |
| rs1787702786 | genic_downstream_transcript_variant,intron_variant                                                                        |
| rs1788717613 | genic_upstream_transcript_variant,intron_variant                                                                          |
| rs1789989960 | intron_variant,genic_downstream_transcript_variant                                                                        |
| rs1790046799 | 5_prime_UTR_variant,non_coding_transcript_variant,genic_upstream_transcript_variant,intron_variant                        |
| rs1790207647 | genic_downstream_transcript_variant,intron_variant                                                                        |
| rs1791464119 | coding_sequence_variant,intron_variant,synonymous_variant,non_coding_transcript_variant,genic_upstream_transcript_variant |
| rs1791464380 | coding_sequence_variant,intron_variant,synonymous_variant,non_coding_transcript_variant,genic_upstream_transcript_variant |
| rs1791464742 | coding_sequence_variant,missense_variant,intron_variant,non_coding_transcript_variant,genic_upstream_transcript_variant   |
| rs1791466202 | coding_sequence_variant,missense_variant,intron_variant,non_coding_transcript_variant,genic_upstream_transcript_variant   |
| rs1791467122 | coding_sequence_variant,missense_variant,intron_variant,non_coding_transcript_variant,genic_upstream_transcript_variant   |
| rs1791469321 | coding_sequence_variant,missense_variant,intron_variant,non_coding_transcript_variant,genic_upstream_transcript_variant   |
| rs1791469817 | coding_sequence_variant,missense_variant,intron_variant,non_coding_transcript_variant,genic_upstream_transcript_variant   |
| rs1791473061 | coding_sequence_variant,missense_variant,intron_variant,non_coding_transcript_variant,genic_upstream_transcript_variant   |
| rs1791473786 | coding_sequence_variant,missense_variant,intron_variant,non_coding_transcript_variant,genic_upstream_transcript_variant   |
| rs1791476896 | coding_sequence_variant,missense_variant,intron_variant,non_coding_transcript_variant,genic_upstream_transcript_variant   |
| rs1791478666 | coding_sequence_variant,missense_variant,intron_variant,non_coding_transcript_variant,genic_upstream_transcript_variant   |
| rs1791479941 | coding_sequence_variant,intron_variant,synonymous_variant,non_coding_transcript_variant,genic_upstream_transcript_variant |
| rs1791486595 | coding_sequence_variant,missense_variant,intron_variant,non_coding_transcript_variant,genic_upstream_transcript_variant   |
| rs1791488808 | coding_sequence_variant,intron_variant,synonymous_variant,non_coding_transcript_variant,genic_upstream_transcript_variant |
| rs1791489014 | coding_sequence_variant,missense_variant,intron_variant,non_coding_transcript_variant,genic_upstream_transcript_variant   |
| rs1791489742 | coding_sequence_variant,intron_variant,synonymous_variant,non_coding_transcript_variant,genic_upstream_transcript_variant |
| rs1791491463 | coding_sequence_variant,missense_variant,intron_variant,non_coding_transcript_variant,genic_upstream_transcript_variant   |
| rs1791491672 | coding_sequence_variant,missense_variant,intron_variant,non_coding_transcript_variant,genic_upstream_transcript_variant   |
| rs1791494214 | coding_sequence_variant,intron_variant,synonymous_variant,non_coding_transcript_variant,genic_upstream_transcript_variant |
| rs1791494311 | coding_sequence_variant,frameshift_variant,intron_variant,non_coding_transcript_variant,genic_upstream_transcript_variant |
| rs1791496321 | coding_sequence_variant,missense_variant,intron_variant,non_coding_transcript_variant,genic_upstream_transcript_variant   |
| rs1791503123 | coding_sequence_variant,intron_variant,synonymous_variant,non_coding_transcript_variant,genic_upstream_transcript_variant |
| rs1791503359 | coding_sequence_variant,missense_variant,intron_variant,non_coding_transcript_variant,genic_upstream_transcript_variant   |
| rs1791505633 | coding_sequence_variant,missense_variant,intron_variant,non_coding_transcript_variant,genic_upstream_transcript_variant   |
| rs1791505734 | coding_sequence_variant,intron_variant,synonymous_variant,non_coding_transcript_variant,genic_upstream_transcript_variant |
| rs1791507812 | coding_sequence_variant,frameshift_variant,intron_variant,non_coding_transcript_variant,genic_upstream_transcript_variant |
| rs1791507929 | coding_sequence_variant,intron_variant,synonymous_variant,non_coding_transcript_variant,genic_upstream_transcript_variant |
| rs1791508132 | coding_sequence_variant,missense_variant,intron_variant,non_coding_transcript_variant,genic_upstream_transcript_variant   |
| rs1791510135 | coding_sequence_variant,missense_variant,intron_variant,non_coding_transcript_variant,genic_upstream_transcript_variant   |



















































































|              |                                                                              |
|--------------|------------------------------------------------------------------------------|
| rs1792616757 | intron_variant,upstream_transcript_variant,genic_upstream_transcript_variant |
| rs1792617398 | intron_variant,upstream_transcript_variant,genic_upstream_transcript_variant |
| rs1792617723 | intron_variant,upstream_transcript_variant,genic_upstream_transcript_variant |
| rs1792618085 | intron_variant,upstream_transcript_variant,genic_upstream_transcript_variant |
| rs1792618203 | intron_variant,upstream_transcript_variant,genic_upstream_transcript_variant |
| rs1792619340 | intron_variant,upstream_transcript_variant,genic_upstream_transcript_variant |
| rs1792619508 | intron_variant,upstream_transcript_variant,genic_upstream_transcript_variant |
| rs1792620552 | intron_variant,upstream_transcript_variant,genic_upstream_transcript_variant |
| rs1792621006 | intron_variant,upstream_transcript_variant,genic_upstream_transcript_variant |
| rs1792621267 | intron_variant,upstream_transcript_variant,genic_upstream_transcript_variant |
| rs1792621732 | intron_variant,upstream_transcript_variant,genic_upstream_transcript_variant |
| rs1792622176 | intron_variant,upstream_transcript_variant,genic_upstream_transcript_variant |
| rs1792622410 | intron_variant,upstream_transcript_variant,genic_upstream_transcript_variant |
| rs1792623003 | intron_variant,upstream_transcript_variant,genic_upstream_transcript_variant |
| rs1792624068 | intron_variant,upstream_transcript_variant,genic_upstream_transcript_variant |
| rs1792624284 | intron_variant,upstream_transcript_variant,genic_upstream_transcript_variant |
| rs1792624553 | intron_variant,upstream_transcript_variant,genic_upstream_transcript_variant |
| rs1792626061 | intron_variant,5_prime_UTR_variant                                           |
| rs1792626166 | intron_variant,5_prime_UTR_variant                                           |
| rs1792626415 | intron_variant,5_prime_UTR_variant                                           |
| rs1792626612 | intron_variant,5_prime_UTR_variant                                           |
| rs1792627095 | intron_variant,5_prime_UTR_variant                                           |
| rs1792627706 | intron_variant,5_prime_UTR_variant                                           |
| rs1792628695 | intron_variant,5_prime_UTR_variant                                           |
| rs1792629622 | intron_variant,5_prime_UTR_variant                                           |
| rs1792630502 | intron_variant                                                               |
| rs1792631795 | intron_variant                                                               |
| rs1792632424 | intron_variant                                                               |
| rs1792632962 | intron_variant                                                               |
| rs1792633373 | intron_variant                                                               |
| rs1792633884 | intron_variant                                                               |
| rs1792634598 | intron_variant                                                               |
| rs1792635484 | intron_variant                                                               |
| rs1792636111 | intron_variant                                                               |
| rs1792637115 | intron_variant                                                               |
| rs1792638240 | intron_variant                                                               |
| rs1792638740 | intron_variant                                                               |
| rs1792640328 | intron_variant                                                               |
| rs1792641234 | intron_variant                                                               |
| rs1792641585 | intron_variant                                                               |
| rs1792641935 | intron_variant                                                               |
| rs1792642100 | intron_variant                                                               |
| rs1792642813 | intron_variant                                                               |
| rs1792643004 | intron_variant                                                               |
| rs1792644490 | intron_variant                                                               |
| rs1792647040 | intron_variant                                                               |
| rs1792647722 | intron_variant                                                               |
| rs1792647914 | intron_variant                                                               |
| rs1792648090 | intron_variant                                                               |
| rs1792648257 | intron_variant                                                               |
| rs1792651411 | intron_variant                                                               |
| rs1792651712 | intron_variant                                                               |
| rs1792651887 | intron_variant                                                               |
| rs1792652580 | intron_variant                                                               |
| rs1792652755 | intron_variant                                                               |
| rs1792653883 | intron_variant                                                               |
| rs1792654508 | intron_variant                                                               |
| rs1792655591 | intron_variant                                                               |
| rs1792658168 | intron_variant                                                               |
| rs1792658500 | intron_variant                                                               |
| rs1792658863 | intron_variant                                                               |
| rs1792659217 | intron_variant                                                               |
| rs1792659720 | intron_variant                                                               |
| rs1792659906 | intron_variant                                                               |
| rs1792660357 | intron_variant                                                               |
| rs1792660472 | intron_variant                                                               |
| rs1792660794 | intron_variant                                                               |
| rs1792661134 | intron_variant                                                               |
| rs1792661667 | intron_variant                                                               |
| rs1792661999 | intron_variant                                                               |
| rs1792662089 | intron_variant                                                               |
| rs1792662190 | intron_variant                                                               |
| rs1792662566 | intron_variant                                                               |
| rs1792662666 | intron_variant                                                               |

|              |                                                            |
|--------------|------------------------------------------------------------|
| rs1792663008 | intron_variant                                             |
| rs1792663219 | intron_variant                                             |
| rs1792663321 | intron_variant                                             |
| rs1792663529 | intron_variant                                             |
| rs1792663637 | intron_variant                                             |
| rs1792663836 | intron_variant                                             |
| rs1792663949 | intron_variant                                             |
| rs1792664051 | intron_variant                                             |
| rs1792664257 | intron_variant                                             |
| rs1792664681 | intron_variant                                             |
| rs1792665053 | intron_variant                                             |
| rs1792665860 | intron_variant                                             |
| rs1792666513 | intron_variant                                             |
| rs1792666742 | intron_variant                                             |
| rs1792668228 | intron_variant                                             |
| rs1792669049 | intron_variant                                             |
| rs1792669605 | intron_variant                                             |
| rs1792669685 | intron_variant                                             |
| rs1792669894 | intron_variant                                             |
| rs1792670007 | intron_variant                                             |
| rs1792670102 | intron_variant                                             |
| rs1792670225 | intron_variant                                             |
| rs1792670757 | intron_variant                                             |
| rs1792672739 | intron_variant                                             |
| rs1792673996 | intron_variant,5_prime_UTR_variant,splice_acceptor_variant |
| rs1792674332 | intron_variant,5_prime_UTR_variant                         |
| rs1792674788 | intron_variant,5_prime_UTR_variant                         |
| rs1792675788 | intron_variant,5_prime_UTR_variant                         |
| rs1792676482 | intron_variant,5_prime_UTR_variant                         |
| rs1792677192 | intron_variant,5_prime_UTR_variant                         |
| rs1792677679 | intron_variant,5_prime_UTR_variant                         |
| rs1792678593 | intron_variant,5_prime_UTR_variant                         |
| rs1792678748 | intron_variant,5_prime_UTR_variant                         |
| rs1792678897 | intron_variant,5_prime_UTR_variant                         |
| rs1792679313 | intron_variant,splice_donor_variant                        |
| rs1792680528 | intron_variant                                             |
| rs1792681674 | intron_variant                                             |
| rs1792681840 | intron_variant                                             |
| rs1792682206 | intron_variant                                             |
| rs1792682317 | intron_variant                                             |
| rs1792682425 | intron_variant                                             |
| rs1792682528 | intron_variant                                             |
| rs1792682871 | intron_variant                                             |
| rs1792683068 | intron_variant                                             |
| rs1792683734 | intron_variant                                             |
| rs1792684067 | intron_variant                                             |
| rs1792684946 | intron_variant                                             |
| rs1792685043 | intron_variant                                             |
| rs1792685276 | intron_variant                                             |
| rs1792685494 | intron_variant                                             |
| rs1792685800 | intron_variant                                             |
| rs1792686003 | intron_variant                                             |
| rs1792686121 | intron_variant                                             |
| rs1792686495 | intron_variant                                             |
| rs1792686604 | intron_variant                                             |
| rs1792686954 | intron_variant                                             |
| rs1792687186 | intron_variant                                             |
| rs1792687481 | intron_variant                                             |
| rs1792687788 | intron_variant                                             |
| rs1792687891 | intron_variant                                             |
| rs1792688201 | intron_variant                                             |
| rs1792688299 | intron_variant                                             |
| rs1792688404 | intron_variant                                             |
| rs1792689485 | intron_variant                                             |
| rs1792689733 | intron_variant                                             |
| rs1792690076 | intron_variant                                             |
| rs1792690790 | intron_variant                                             |
| rs1792690890 | intron_variant                                             |
| rs1792691071 | intron_variant                                             |
| rs1792691226 | intron_variant                                             |
| rs1792691386 | intron_variant                                             |
| rs1792691558 | intron_variant                                             |
| rs1792691898 | intron_variant                                             |
| rs1792692244 | intron_variant                                             |

|              |                |
|--------------|----------------|
| rs1792692564 | intron_variant |
| rs1792693202 | intron_variant |
| rs1792693506 | intron_variant |
| rs1792693657 | intron_variant |
| rs1792693818 | intron_variant |
| rs1792694189 | intron_variant |
| rs1792694523 | intron_variant |
| rs1792696236 | intron_variant |
| rs1792696387 | intron_variant |
| rs1792696749 | intron_variant |
| rs1792697109 | intron_variant |
| rs1792697598 | intron_variant |
| rs1792697762 | intron_variant |
| rs1792698621 | intron_variant |
| rs1792698823 | intron_variant |
| rs1792699338 | intron_variant |
| rs1792699524 | intron_variant |
| rs1792699869 | intron_variant |
| rs1792700247 | intron_variant |
| rs1792700821 | intron_variant |
| rs1792701254 | intron_variant |
| rs1792702271 | intron_variant |
| rs1792702496 | intron_variant |
| rs1792702695 | intron_variant |
| rs1792702887 | intron_variant |
| rs1792703051 | intron_variant |
| rs1792703223 | intron_variant |
| rs1792703432 | intron_variant |
| rs1792704539 | intron_variant |
| rs1792705520 | intron_variant |
| rs1792706742 | intron_variant |
| rs1792706932 | intron_variant |
| rs1792707243 | intron_variant |
| rs1792707803 | intron_variant |
| rs1792707990 | intron_variant |
| rs1792708166 | intron_variant |
| rs1792709557 | intron_variant |
| rs1792709710 | intron_variant |
| rs1792711017 | intron_variant |
| rs1792711792 | intron_variant |
| rs1792712557 | intron_variant |
| rs1792714020 | intron_variant |
| rs1792714384 | intron_variant |
| rs1792716320 | intron_variant |
| rs1792716618 | intron_variant |
| rs1792716734 | intron_variant |
| rs1792716859 | intron_variant |
| rs1792717206 | intron_variant |
| rs1792717590 | intron_variant |
| rs1792717701 | intron_variant |
| rs1792717882 | intron_variant |
| rs1792718297 | intron_variant |
| rs1792720144 | intron_variant |
| rs1792721814 | intron_variant |
| rs1792722122 | intron_variant |
| rs1792722546 | intron_variant |
| rs1792723531 | intron_variant |
| rs1792724323 | intron_variant |
| rs1792724689 | intron_variant |
| rs1792724859 | intron_variant |
| rs1792725447 | intron_variant |
| rs1792726012 | intron_variant |
| rs1792726183 | intron_variant |
| rs1792726353 | intron_variant |
| rs1792726949 | intron_variant |
| rs1792727158 | intron_variant |
| rs1792727998 | intron_variant |
| rs1792728794 | intron_variant |
| rs1792729347 | intron_variant |
| rs1792729722 | intron_variant |
| rs1792730076 | intron_variant |
| rs1792730247 | intron_variant |
| rs1792730535 | intron_variant |
| rs1792730924 | intron_variant |

|              |                |
|--------------|----------------|
| rs1792731093 | intron_variant |
| rs1792731520 | intron_variant |
| rs1792731896 | intron_variant |
| rs1792732107 | intron_variant |
| rs1792732205 | intron_variant |
| rs1792732306 | intron_variant |
| rs1792732783 | intron_variant |
| rs1792732907 | intron_variant |
| rs1792734200 | intron_variant |
| rs1792734310 | intron_variant |
| rs1792734709 | intron_variant |
| rs1792734887 | intron_variant |
| rs1792735009 | intron_variant |
| rs1792735314 | intron_variant |
| rs1792735610 | intron_variant |
| rs1792735828 | intron_variant |
| rs1792736036 | intron_variant |
| rs1792736886 | intron_variant |
| rs1792737101 | intron_variant |
| rs1792737331 | intron_variant |
| rs1792738071 | intron_variant |
| rs1792738165 | intron_variant |
| rs1792738266 | intron_variant |
| rs1792738934 | intron_variant |
| rs1792739548 | intron_variant |
| rs1792739654 | intron_variant |
| rs1792740004 | intron_variant |
| rs1792740258 | intron_variant |
| rs1792740892 | intron_variant |
| rs1792741274 | intron_variant |
| rs1792741924 | intron_variant |
| rs1792742014 | intron_variant |
| rs1792742109 | intron_variant |
| rs1792742206 | intron_variant |
| rs1792742390 | intron_variant |
| rs1792742667 | intron_variant |
| rs1792742769 | intron_variant |
| rs1792742953 | intron_variant |
| rs1792743060 | intron_variant |
| rs1792743151 | intron_variant |
| rs1792743330 | intron_variant |
| rs1792743440 | intron_variant |
| rs1792743605 | intron_variant |
| rs1792743740 | intron_variant |
| rs1792744047 | intron_variant |
| rs1792744559 | intron_variant |
| rs1792744820 | intron_variant |
| rs1792744992 | intron_variant |
| rs1792745108 | intron_variant |
| rs1792745219 | intron_variant |
| rs1792745508 | intron_variant |
| rs1792745900 | intron_variant |
| rs1792746431 | intron_variant |
| rs1792746797 | intron_variant |
| rs1792747093 | intron_variant |
| rs1792747258 | intron_variant |
| rs1792747693 | intron_variant |
| rs1792747900 | intron_variant |
| rs1792748325 | intron_variant |
| rs1792748902 | intron_variant |
| rs1792749041 | intron_variant |
| rs1792749149 | intron_variant |
| rs1792749302 | intron_variant |
| rs1792749510 | intron_variant |
| rs1792750818 | intron_variant |
| rs1792751452 | intron_variant |
| rs1792752309 | intron_variant |
| rs1792755618 | intron_variant |
| rs1792755920 | intron_variant |
| rs1792756069 | intron_variant |
| rs1792756194 | intron_variant |
| rs1792756299 | intron_variant |
| rs1792756408 | intron_variant |
| rs1792756632 | intron_variant |

|              |                |
|--------------|----------------|
| rs1792756732 | intron_variant |
| rs1792756841 | intron_variant |
| rs1792757002 | intron_variant |
| rs1792757255 | intron_variant |
| rs1792757483 | intron_variant |
| rs1792757715 | intron_variant |
| rs1792757916 | intron_variant |
| rs1792758001 | intron_variant |
| rs1792758255 | intron_variant |
| rs1792758352 | intron_variant |
| rs1792758445 | intron_variant |
| rs1792758555 | intron_variant |
| rs1792758690 | intron_variant |
| rs1792758921 | intron_variant |
| rs1792759058 | intron_variant |
| rs1792759165 | intron_variant |
| rs1792759363 | intron_variant |
| rs1792759466 | intron_variant |
| rs1792760062 | intron_variant |
| rs1792760352 | intron_variant |
| rs1792760481 | intron_variant |
| rs1792760744 | intron_variant |
| rs1792760842 | intron_variant |
| rs1792760991 | intron_variant |
| rs1792761274 | intron_variant |
| rs1792761442 | intron_variant |
| rs1792761748 | intron_variant |
| rs1792761914 | intron_variant |
| rs1792762129 | intron_variant |
| rs1792762297 | intron_variant |
| rs1792762465 | intron_variant |
| rs1792762877 | intron_variant |
| rs1792763128 | intron_variant |
| rs1792763269 | intron_variant |
| rs1792763552 | intron_variant |
| rs1792763730 | intron_variant |
| rs1792763918 | intron_variant |
| rs1792764255 | intron_variant |
| rs1792764485 | intron_variant |
| rs1792764562 | intron_variant |
| rs1792764802 | intron_variant |
| rs1792764915 | intron_variant |
| rs1792765702 | intron_variant |
| rs1792765879 | intron_variant |
| rs1792766006 | intron_variant |
| rs1792766281 | intron_variant |
| rs1792766412 | intron_variant |
| rs1792766529 | intron_variant |
| rs1792766636 | intron_variant |
| rs1792766876 | intron_variant |
| rs1792766990 | intron_variant |
| rs1792767111 | intron_variant |
| rs1792767528 | intron_variant |
| rs1792767733 | intron_variant |
| rs1792767956 | intron_variant |
| rs1792768236 | intron_variant |
| rs1792769203 | intron_variant |
| rs1792769666 | intron_variant |
| rs1792769753 | intron_variant |
| rs1792769964 | intron_variant |
| rs1792770069 | intron_variant |
| rs1792770232 | intron_variant |
| rs1792770345 | intron_variant |
| rs1792770463 | intron_variant |
| rs1792771059 | intron_variant |
| rs1792771259 | intron_variant |
| rs1792771372 | intron_variant |
| rs1792772117 | intron_variant |
| rs1792772229 | intron_variant |
| rs1792772348 | intron_variant |
| rs1792772454 | intron_variant |
| rs1792772583 | intron_variant |
| rs1792772735 | intron_variant |
| rs1792773539 | intron_variant |

|              |                |
|--------------|----------------|
| rs1792773630 | intron_variant |
| rs1792774247 | intron_variant |
| rs1792774352 | intron_variant |
| rs1792775070 | intron_variant |
| rs1792775453 | intron_variant |
| rs1792775567 | intron_variant |
| rs1792775665 | intron_variant |
| rs1792775795 | intron_variant |
| rs1792776256 | intron_variant |
| rs1792777495 | intron_variant |
| rs1792778566 | intron_variant |
| rs1792778743 | intron_variant |
| rs1792778856 | intron_variant |
| rs1792778973 | intron_variant |
| rs1792779678 | intron_variant |
| rs1792779888 | intron_variant |
| rs1792780978 | intron_variant |
| rs1792781176 | intron_variant |
| rs1792781391 | intron_variant |
| rs1792781488 | intron_variant |
| rs1792782116 | intron_variant |
| rs1792782345 | intron_variant |
| rs1792782764 | intron_variant |
| rs1792783038 | intron_variant |
| rs1792783485 | intron_variant |
| rs1792784490 | intron_variant |
| rs1792784619 | intron_variant |
| rs1792785397 | intron_variant |
| rs1792785611 | intron_variant |
| rs1792786191 | intron_variant |
| rs1792786297 | intron_variant |
| rs1792786546 | intron_variant |
| rs1792786665 | intron_variant |
| rs1792786864 | intron_variant |
| rs1792788843 | intron_variant |
| rs1792789203 | intron_variant |
| rs1792789644 | intron_variant |
| rs1792789757 | intron_variant |
| rs1792789876 | intron_variant |
| rs1792790159 | intron_variant |
| rs1792790637 | intron_variant |
| rs1792791768 | intron_variant |
| rs1792792109 | intron_variant |
| rs1792792280 | intron_variant |
| rs1792792444 | intron_variant |
| rs1792792659 | intron_variant |
| rs1792792901 | intron_variant |
| rs1792793061 | intron_variant |
| rs1792794205 | intron_variant |
| rs1792794699 | intron_variant |
| rs1792797820 | intron_variant |
| rs1792799755 | intron_variant |
| rs1792801339 | intron_variant |
| rs1792801889 | intron_variant |
| rs1792803445 | intron_variant |
| rs1792803808 | intron_variant |
| rs1792804687 | intron_variant |
| rs1792805246 | intron_variant |
| rs1792806365 | intron_variant |
| rs1792806703 | intron_variant |
| rs1792806892 | intron_variant |
| rs1792807076 | intron_variant |
| rs1792807434 | intron_variant |
| rs1792807537 | intron_variant |
| rs1792807634 | intron_variant |
| rs1792808171 | intron_variant |
| rs1792808433 | intron_variant |
| rs1792808716 | intron_variant |
| rs1792808847 | intron_variant |
| rs1792808977 | intron_variant |
| rs1792809223 | intron_variant |
| rs1792809328 | intron_variant |
| rs1792809808 | intron_variant |
| rs1792809920 | intron_variant |

|              |                |
|--------------|----------------|
| rs1792810589 | intron_variant |
| rs1792810684 | intron_variant |
| rs1792810960 | intron_variant |
| rs1792811065 | intron_variant |
| rs1792811383 | intron_variant |
| rs1792811595 | intron_variant |
| rs1792812211 | intron_variant |
| rs1792812314 | intron_variant |
| rs1792812412 | intron_variant |
| rs1792813029 | intron_variant |
| rs1792813194 | intron_variant |
| rs1792813343 | intron_variant |
| rs1792813653 | intron_variant |
| rs1792813859 | intron_variant |
| rs1792814658 | intron_variant |
| rs1792814948 | intron_variant |
| rs1792815033 | intron_variant |
| rs1792815148 | intron_variant |
| rs1792815246 | intron_variant |
| rs1792815353 | intron_variant |
| rs1792815562 | intron_variant |
| rs1792815897 | intron_variant |
| rs1792817018 | intron_variant |
| rs1792817778 | intron_variant |
| rs1792818094 | intron_variant |
| rs1792818585 | intron_variant |
| rs1792819435 | intron_variant |
| rs1792820298 | intron_variant |
| rs1792820738 | intron_variant |
| rs1792820913 | intron_variant |
| rs1792821083 | intron_variant |
| rs1792821237 | intron_variant |
| rs1792821388 | intron_variant |
| rs1792821553 | intron_variant |
| rs1792821844 | intron_variant |
| rs1792822160 | intron_variant |
| rs1792822610 | intron_variant |
| rs1792822913 | intron_variant |
| rs1792823054 | intron_variant |
| rs1792823225 | intron_variant |
| rs1792823387 | intron_variant |
| rs1792824172 | intron_variant |
| rs1792824311 | intron_variant |
| rs1792824473 | intron_variant |
| rs1792824634 | intron_variant |
| rs1792824799 | intron_variant |
| rs1792825869 | intron_variant |
| rs1792826153 | intron_variant |
| rs1792826299 | intron_variant |
| rs1792828299 | intron_variant |
| rs1792828456 | intron_variant |
| rs1792828832 | intron_variant |
| rs1792829908 | intron_variant |
| rs1792830714 | intron_variant |
| rs1792830885 | intron_variant |
| rs1792831160 | intron_variant |
| rs1792832106 | intron_variant |
| rs1792832206 | intron_variant |
| rs1792832571 | intron_variant |
| rs1792832669 | intron_variant |
| rs1792832778 | intron_variant |
| rs1792832879 | intron_variant |
| rs1792833753 | intron_variant |
| rs1792833858 | intron_variant |
| rs1792833960 | intron_variant |
| rs1792834482 | intron_variant |
| rs1792834599 | intron_variant |
| rs1792834689 | intron_variant |
| rs1792834794 | intron_variant |
| rs1792835034 | intron_variant |
| rs1792835380 | intron_variant |
| rs1792835648 | intron_variant |
| rs1792835753 | intron_variant |
| rs1792835835 | intron_variant |

|              |                |
|--------------|----------------|
| rs1792836032 | intron_variant |
| rs1792836346 | intron_variant |
| rs1792836670 | intron_variant |
| rs1792836818 | intron_variant |
| rs1792837173 | intron_variant |
| rs1792837516 | intron_variant |
| rs1792837826 | intron_variant |
| rs1792837908 | intron_variant |
| rs1792838007 | intron_variant |
| rs1792838460 | intron_variant |
| rs1792838880 | intron_variant |
| rs1792839130 | intron_variant |
| rs1792839366 | intron_variant |
| rs1792840464 | intron_variant |
| rs1792840812 | intron_variant |
| rs1792841089 | intron_variant |
| rs1792841403 | intron_variant |
| rs1792841553 | intron_variant |
| rs1792841881 | intron_variant |
| rs1792842214 | intron_variant |
| rs1792842390 | intron_variant |
| rs1792842961 | intron_variant |
| rs1792843277 | intron_variant |
| rs1792843428 | intron_variant |
| rs1792844133 | intron_variant |
| rs1792844781 | intron_variant |
| rs1792845142 | intron_variant |
| rs1792845845 | intron_variant |
| rs1792846310 | intron_variant |
| rs1792846456 | intron_variant |
| rs1792846783 | intron_variant |
| rs1792846920 | intron_variant |
| rs1792847028 | intron_variant |
| rs1792847119 | intron_variant |
| rs1792847229 | intron_variant |
| rs1792847635 | intron_variant |
| rs1792847939 | intron_variant |
| rs1792848038 | intron_variant |
| rs1792848132 | intron_variant |
| rs1792848578 | intron_variant |
| rs1792849530 | intron_variant |
| rs1792849781 | intron_variant |
| rs1792850123 | intron_variant |
| rs1792850359 | intron_variant |
| rs1792850561 | intron_variant |
| rs1792850919 | intron_variant |
| rs1792851012 | intron_variant |
| rs1792851219 | intron_variant |
| rs1792851319 | intron_variant |
| rs1792851962 | intron_variant |
| rs1792852522 | intron_variant |
| rs1792852710 | intron_variant |
| rs1792852926 | intron_variant |
| rs1792853393 | intron_variant |
| rs1792853505 | intron_variant |
| rs1792853875 | intron_variant |
| rs1792853971 | intron_variant |
| rs1792854470 | intron_variant |
| rs1792854795 | intron_variant |
| rs1792854981 | intron_variant |
| rs1792855694 | intron_variant |
| rs1792855889 | intron_variant |
| rs1792856205 | intron_variant |
| rs1792856294 | intron_variant |
| rs1792856385 | intron_variant |
| rs1792856699 | intron_variant |
| rs1792856940 | intron_variant |
| rs1792857158 | intron_variant |
| rs1792857261 | intron_variant |
| rs1792857460 | intron_variant |
| rs1792857546 | intron_variant |
| rs1792857637 | intron_variant |
| rs1792857736 | intron_variant |
| rs1792857929 | intron_variant |

|              |                |
|--------------|----------------|
| rs1792858391 | intron_variant |
| rs1792858694 | intron_variant |
| rs1792858785 | intron_variant |
| rs1792858889 | intron_variant |
| rs1792858988 | intron_variant |
| rs1792859335 | intron_variant |
| rs1792859550 | intron_variant |
| rs1792859762 | intron_variant |
| rs1792859964 | intron_variant |
| rs1792860817 | intron_variant |
| rs1792861031 | intron_variant |
| rs1792861501 | intron_variant |
| rs1792861833 | intron_variant |
| rs1792862350 | intron_variant |
| rs1792862948 | intron_variant |
| rs1792863116 | intron_variant |
| rs1792863780 | intron_variant |
| rs1792864114 | intron_variant |
| rs1792864755 | intron_variant |
| rs1792865483 | intron_variant |
| rs1792865586 | intron_variant |
| rs1792866767 | intron_variant |
| rs1792866970 | intron_variant |
| rs1792867158 | intron_variant |
| rs1792867249 | intron_variant |
| rs1792868826 | intron_variant |
| rs1792868987 | intron_variant |
| rs1792869578 | intron_variant |
| rs1792869754 | intron_variant |
| rs1792869930 | intron_variant |
| rs1792870073 | intron_variant |
| rs1792870276 | intron_variant |
| rs1792870370 | intron_variant |
| rs1792870569 | intron_variant |
| rs1792870906 | intron_variant |
| rs1792871551 | intron_variant |
| rs1792871724 | intron_variant |
| rs1792872692 | intron_variant |
| rs1792872802 | intron_variant |
| rs1792872933 | intron_variant |
| rs1792873047 | intron_variant |
| rs1792873221 | intron_variant |
| rs1792874176 | intron_variant |
| rs1792874340 | intron_variant |
| rs1792874425 | intron_variant |
| rs1792874914 | intron_variant |
| rs1792875112 | intron_variant |
| rs1792875509 | intron_variant |
| rs1792875627 | intron_variant |
| rs1792876053 | intron_variant |
| rs1792876376 | intron_variant |
| rs1792876495 | intron_variant |
| rs1792876775 | intron_variant |
| rs1792877842 | intron_variant |
| rs1792878200 | intron_variant |
| rs1792878393 | intron_variant |
| rs1792879373 | intron_variant |
| rs1792879476 | intron_variant |
| rs1792879880 | intron_variant |
| rs1792879983 | intron_variant |
| rs1792880179 | intron_variant |
| rs1792880274 | intron_variant |
| rs1792880740 | intron_variant |
| rs1792881052 | intron_variant |
| rs1792881456 | intron_variant |
| rs1792881552 | intron_variant |
| rs1792881951 | intron_variant |
| rs1792882264 | intron_variant |
| rs1792882482 | intron_variant |
| rs1792882677 | intron_variant |
| rs1792883048 | intron_variant |
| rs1792883276 | intron_variant |
| rs1792883579 | intron_variant |
| rs1792883671 | intron_variant |

|              |                |
|--------------|----------------|
| rs1792885424 | intron_variant |
| rs1792885530 | intron_variant |
| rs1792885732 | intron_variant |
| rs1792886268 | intron_variant |
| rs1792886370 | intron_variant |
| rs1792886464 | intron_variant |
| rs1792887010 | intron_variant |
| rs1792887224 | intron_variant |
| rs1792887486 | intron_variant |
| rs1792887575 | intron_variant |
| rs1792887880 | intron_variant |
| rs1792888352 | intron_variant |
| rs1792888449 | intron_variant |
| rs1792888660 | intron_variant |
| rs1792888850 | intron_variant |
| rs1792888966 | intron_variant |
| rs1792889530 | intron_variant |
| rs1792890018 | intron_variant |
| rs1792890219 | intron_variant |
| rs1792890318 | intron_variant |
| rs1792890519 | intron_variant |
| rs1792890619 | intron_variant |
| rs1792890710 | intron_variant |
| rs1792890806 | intron_variant |
| rs1792890909 | intron_variant |
| rs1792891013 | intron_variant |
| rs1792891304 | intron_variant |
| rs1792891715 | intron_variant |
| rs1792891926 | intron_variant |
| rs1792892014 | intron_variant |
| rs1792892103 | intron_variant |
| rs1792892336 | intron_variant |
| rs1792892674 | intron_variant |
| rs1792893000 | intron_variant |
| rs1792893717 | intron_variant |
| rs1792893814 | intron_variant |
| rs1792893911 | intron_variant |
| rs1792894124 | intron_variant |
| rs1792894326 | intron_variant |
| rs1792894422 | intron_variant |
| rs1792894633 | intron_variant |
| rs1792895091 | intron_variant |
| rs1792895589 | intron_variant |
| rs1792895711 | intron_variant |
| rs1792895790 | intron_variant |
| rs1792896518 | intron_variant |
| rs1792896958 | intron_variant |
| rs1792897068 | intron_variant |
| rs1792897165 | intron_variant |
| rs1792897406 | intron_variant |
| rs1792897879 | intron_variant |
| rs1792898371 | intron_variant |
| rs1792898521 | intron_variant |
| rs1792898864 | intron_variant |
| rs1792899358 | intron_variant |
| rs1792899591 | intron_variant |
| rs1792900091 | intron_variant |
| rs1792900773 | intron_variant |
| rs1792901118 | intron_variant |
| rs1792901353 | intron_variant |
| rs1792901910 | intron_variant |
| rs1792902720 | intron_variant |
| rs1792902898 | intron_variant |
| rs1792903429 | intron_variant |
| rs1792903713 | intron_variant |
| rs1792904328 | intron_variant |
| rs1792905070 | intron_variant |
| rs1792905291 | intron_variant |
| rs1792906338 | intron_variant |
| rs1792906548 | intron_variant |
| rs1792906963 | intron_variant |
| rs1792907063 | intron_variant |
| rs1792907160 | intron_variant |
| rs1792907249 | intron_variant |

|              |                                                                                                     |
|--------------|-----------------------------------------------------------------------------------------------------|
| rs1792907357 | intron_variant                                                                                      |
| rs1792907466 | intron_variant                                                                                      |
| rs1792908063 | intron_variant                                                                                      |
| rs1792908176 | intron_variant                                                                                      |
| rs1792908647 | intron_variant                                                                                      |
| rs1792909873 | intron_variant                                                                                      |
| rs1792910016 | intron_variant                                                                                      |
| rs1792910121 | intron_variant                                                                                      |
| rs1792910194 | intron_variant,2KB_upstream_variant,upstream_transcript_variant,genetic_upstream_transcript_variant |
| rs1792910834 | intron_variant                                                                                      |
| rs1792911343 | intron_variant                                                                                      |
| rs1792912124 | intron_variant                                                                                      |
| rs1792912371 | intron_variant                                                                                      |
| rs1792912772 | intron_variant                                                                                      |
| rs1792912935 | intron_variant                                                                                      |
| rs1792913103 | intron_variant                                                                                      |
| rs1792913269 | intron_variant                                                                                      |
| rs1792914184 | intron_variant                                                                                      |
| rs1792914501 | intron_variant                                                                                      |
| rs1792914696 | intron_variant                                                                                      |
| rs1792914905 | intron_variant                                                                                      |
| rs1792915015 | intron_variant                                                                                      |
| rs1792915147 | intron_variant                                                                                      |
| rs1792915331 | intron_variant                                                                                      |
| rs1792916111 | intron_variant                                                                                      |
| rs1792916854 | intron_variant                                                                                      |
| rs1792917222 | intron_variant                                                                                      |
| rs1792917381 | intron_variant                                                                                      |
| rs1792917761 | intron_variant                                                                                      |
| rs1792918184 | intron_variant                                                                                      |
| rs1792918882 | intron_variant                                                                                      |
| rs1792919212 | intron_variant                                                                                      |
| rs1792920256 | intron_variant                                                                                      |
| rs1792920619 | intron_variant                                                                                      |
| rs1792921436 | intron_variant                                                                                      |
| rs1792921697 | intron_variant                                                                                      |
| rs1792921858 | intron_variant                                                                                      |
| rs1792922550 | intron_variant                                                                                      |
| rs1792923245 | intron_variant                                                                                      |
| rs1792924084 | intron_variant                                                                                      |
| rs1792924267 | intron_variant                                                                                      |
| rs1792924433 | intron_variant                                                                                      |
| rs1792925984 | intron_variant                                                                                      |
| rs1792926122 | intron_variant                                                                                      |
| rs1792926310 | intron_variant                                                                                      |
| rs1792926493 | intron_variant                                                                                      |
| rs1792926662 | intron_variant                                                                                      |
| rs1792926826 | intron_variant                                                                                      |
| rs1792927003 | intron_variant                                                                                      |
| rs1792927610 | intron_variant                                                                                      |
| rs1792928924 | intron_variant                                                                                      |
| rs1792929108 | intron_variant                                                                                      |
| rs1792929281 | intron_variant                                                                                      |
| rs1792930257 | intron_variant                                                                                      |
| rs1792931520 | intron_variant                                                                                      |
| rs1792931709 | intron_variant                                                                                      |
| rs1792931898 | intron_variant                                                                                      |
| rs1792932086 | intron_variant                                                                                      |
| rs1792932437 | intron_variant                                                                                      |
| rs1792932599 | intron_variant                                                                                      |
| rs1792933187 | intron_variant                                                                                      |
| rs1792933975 | intron_variant                                                                                      |
| rs1792934307 | intron_variant                                                                                      |
| rs1792934479 | intron_variant                                                                                      |
| rs1792934638 | intron_variant                                                                                      |
| rs1792934804 | intron_variant                                                                                      |
| rs1792934959 | intron_variant                                                                                      |
| rs1792935318 | intron_variant                                                                                      |
| rs1792935644 | intron_variant                                                                                      |
| rs1792936579 | intron_variant                                                                                      |
| rs1792937372 | intron_variant                                                                                      |
| rs1792937534 | intron_variant                                                                                      |
| rs1792937699 | intron_variant,genetic_downstream_transcript_variant                                                |
| rs1792938792 | intron_variant                                                                                      |

|              |                |
|--------------|----------------|
| rs1792939423 | intron_variant |
| rs1792940337 | intron_variant |
| rs1792940951 | intron_variant |
| rs1792941060 | intron_variant |
| rs1792941717 | intron_variant |
| rs1792941826 | intron_variant |
| rs1792942530 | intron_variant |
| rs1792942872 | intron_variant |
| rs1792942969 | intron_variant |
| rs1792943686 | intron_variant |
| rs1792943793 | intron_variant |
| rs1792944020 | intron_variant |
| rs1792944331 | intron_variant |
| rs1792945110 | intron_variant |
| rs1792945280 | intron_variant |
| rs1792945453 | intron_variant |
| rs1792946149 | intron_variant |
| rs1792946516 | intron_variant |
| rs1792946781 | intron_variant |
| rs1792946891 | intron_variant |
| rs1792947199 | intron_variant |
| rs1792947527 | intron_variant |
| rs1792947828 | intron_variant |
| rs1792948013 | intron_variant |
| rs1792948697 | intron_variant |
| rs1792949063 | intron_variant |
| rs1792949175 | intron_variant |
| rs1792949826 | intron_variant |
| rs1792950477 | intron_variant |
| rs1792951214 | intron_variant |
| rs1792951417 | intron_variant |
| rs1792951715 | intron_variant |
| rs1792951806 | intron_variant |
| rs1792951913 | intron_variant |
| rs1792952402 | intron_variant |
| rs1792953662 | intron_variant |
| rs1792953769 | intron_variant |
| rs1792954514 | intron_variant |
| rs1792954722 | intron_variant |
| rs1792955312 | intron_variant |
| rs1792955431 | intron_variant |
| rs1792955913 | intron_variant |
| rs1792956632 | intron_variant |
| rs1792956803 | intron_variant |
| rs1792957166 | intron_variant |
| rs1792957620 | intron_variant |
| rs1792957731 | intron_variant |
| rs1792959138 | intron_variant |
| rs1792959629 | intron_variant |
| rs1792959851 | intron_variant |
| rs1792959958 | intron_variant |
| rs1792960293 | intron_variant |
| rs1792960959 | intron_variant |
| rs1792961069 | intron_variant |
| rs1792961167 | intron_variant |
| rs1792961270 | intron_variant |
| rs1792961368 | intron_variant |
| rs1792962717 | intron_variant |
| rs1792963330 | intron_variant |
| rs1792964431 | intron_variant |
| rs1792964822 | intron_variant |
| rs1792965369 | intron_variant |
| rs1792965476 | intron_variant |
| rs1792965797 | intron_variant |
| rs1792965926 | intron_variant |
| rs1792966269 | intron_variant |
| rs1792966495 | intron_variant |
| rs1792966977 | intron_variant |
| rs1792967542 | intron_variant |
| rs1792967901 | intron_variant |
| rs1792968124 | intron_variant |
| rs1792968245 | intron_variant |
| rs1792968348 | intron_variant |
| rs1792969471 | intron_variant |

|              |                |
|--------------|----------------|
| rs1792969573 | intron_variant |
| rs1792969865 | intron_variant |
| rs1792969976 | intron_variant |
| rs1792970340 | intron_variant |
| rs1792970443 | intron_variant |
| rs1792970690 | intron_variant |
| rs1792970812 | intron_variant |
| rs1792970919 | intron_variant |
| rs1792971018 | intron_variant |
| rs1792971248 | intron_variant |
| rs1792971573 | intron_variant |
| rs1792971672 | intron_variant |
| rs1792971773 | intron_variant |
| rs1792971869 | intron_variant |
| rs1792972602 | intron_variant |
| rs1792973093 | intron_variant |
| rs1792973194 | intron_variant |
| rs1792973501 | intron_variant |
| rs1792973750 | intron_variant |
| rs1792973853 | intron_variant |
| rs1792975347 | intron_variant |
| rs1792975661 | intron_variant |
| rs1792975799 | intron_variant |
| rs1792975964 | intron_variant |
| rs1792976313 | intron_variant |
| rs1792976465 | intron_variant |
| rs1792976601 | intron_variant |
| rs1792976771 | intron_variant |
| rs1792977855 | intron_variant |
| rs1792979220 | intron_variant |
| rs1792980073 | intron_variant |
| rs1792980303 | intron_variant |
| rs1792980388 | intron_variant |
| rs1792980686 | intron_variant |
| rs1792981177 | intron_variant |
| rs1792981600 | intron_variant |
| rs1792981866 | intron_variant |
| rs1792982084 | intron_variant |
| rs1792982306 | intron_variant |
| rs1792982428 | intron_variant |
| rs1792982535 | intron_variant |
| rs1792982632 | intron_variant |
| rs1792982992 | intron_variant |
| rs1792983158 | intron_variant |
| rs1792983623 | intron_variant |
| rs1792983961 | intron_variant |
| rs1792984163 | intron_variant |
| rs1792984267 | intron_variant |
| rs1792985039 | intron_variant |
| rs1792985142 | intron_variant |
| rs1792985348 | intron_variant |
| rs1792985463 | intron_variant |
| rs1792986226 | intron_variant |
| rs1792986341 | intron_variant |
| rs1792986557 | intron_variant |
| rs1792986649 | intron_variant |
| rs1792986993 | intron_variant |
| rs1792987106 | intron_variant |
| rs1792987356 | intron_variant |
| rs1792987476 | intron_variant |
| rs1792987597 | intron_variant |
| rs1792988132 | intron_variant |
| rs1792988494 | intron_variant |
| rs1792988705 | intron_variant |
| rs1792989501 | intron_variant |
| rs1792989672 | intron_variant |
| rs1792990031 | intron_variant |
| rs1792990870 | intron_variant |
| rs1792991051 | intron_variant |
| rs1792991219 | intron_variant |
| rs1792991658 | intron_variant |
| rs1792991767 | intron_variant |
| rs1792992006 | intron_variant |
| rs1792992309 | intron_variant |

|              |                                                                                            |
|--------------|--------------------------------------------------------------------------------------------|
| rs1792992407 | intron_variant                                                                             |
| rs1792992643 | intron_variant                                                                             |
| rs1792992770 | intron_variant                                                                             |
| rs1792993019 | intron_variant                                                                             |
| rs1792993239 | intron_variant                                                                             |
| rs1792993859 | intron_variant                                                                             |
| rs1792994952 | intron_variant                                                                             |
| rs1792995265 | intron_variant                                                                             |
| rs1792995614 | intron_variant                                                                             |
| rs1792995722 | intron_variant                                                                             |
| rs1792995960 | intron_variant                                                                             |
| rs1792996064 | intron_variant                                                                             |
| rs1792996496 | intron_variant                                                                             |
| rs1792996607 | intron_variant                                                                             |
| rs1792996718 | intron_variant                                                                             |
| rs1792996937 | intron_variant                                                                             |
| rs1792997394 | intron_variant                                                                             |
| rs1792997519 | intron_variant                                                                             |
| rs1792997625 | intron_variant                                                                             |
| rs1792998172 | intron_variant                                                                             |
| rs1792998734 | intron_variant                                                                             |
| rs1792998941 | intron_variant                                                                             |
| rs1792999169 | intron_variant                                                                             |
| rs1793001123 | intron_variant                                                                             |
| rs1793001232 | intron_variant                                                                             |
| rs1793001426 | intron_variant                                                                             |
| rs1793001545 | intron_variant                                                                             |
| rs1793002074 | intron_variant                                                                             |
| rs1793002189 | intron_variant                                                                             |
| rs1793002311 | intron_variant                                                                             |
| rs1793002849 | intron_variant                                                                             |
| rs1793003154 | intron_variant                                                                             |
| rs1793003267 | intron_variant                                                                             |
| rs1793003372 | intron_variant                                                                             |
| rs1793003471 | intron_variant                                                                             |
| rs1793003654 | intron_variant                                                                             |
| rs1793003773 | intron_variant                                                                             |
| rs1793004346 | intron_variant                                                                             |
| rs1793004908 | intron_variant                                                                             |
| rs1793011439 | 5_prime_UTR_variant,non_coding_transcript_variant,coding_sequence_variant,missense_variant |
| rs1793013042 | 5_prime_UTR_variant,non_coding_transcript_variant,coding_sequence_variant,missense_variant |
| rs1793018571 | non_coding_transcript_variant,coding_sequence_variant,missense_variant                     |
| rs1793018682 | non_coding_transcript_variant,coding_sequence_variant,missense_variant                     |
| rs1793022221 | non_coding_transcript_variant,coding_sequence_variant,missense_variant                     |
| rs1793022650 | intron_variant                                                                             |
| rs1793023897 | intron_variant                                                                             |
| rs1793024398 | intron_variant                                                                             |
| rs1793025135 | intron_variant                                                                             |
| rs1793025645 | intron_variant                                                                             |
| rs1793028822 | intron_variant                                                                             |
| rs1793028979 | intron_variant                                                                             |
| rs1793029302 | intron_variant                                                                             |
| rs1793029896 | intron_variant                                                                             |
| rs1793030595 | intron_variant                                                                             |
| rs1793031371 | intron_variant                                                                             |
| rs1793031763 | intron_variant                                                                             |
| rs1793032670 | intron_variant                                                                             |
| rs1793032788 | intron_variant                                                                             |
| rs1793032968 | intron_variant                                                                             |
| rs1793033064 | intron_variant                                                                             |
| rs1793033376 | intron_variant                                                                             |
| rs1793034274 | intron_variant                                                                             |
| rs1793034402 | intron_variant                                                                             |
| rs1793034515 | intron_variant                                                                             |
| rs1793035301 | intron_variant                                                                             |
| rs1793035552 | intron_variant                                                                             |
| rs1793035997 | intron_variant                                                                             |
| rs1793036473 | intron_variant                                                                             |
| rs1793036615 | intron_variant                                                                             |
| rs1793037490 | intron_variant                                                                             |
| rs1793037832 | intron_variant                                                                             |
| rs1793038010 | intron_variant                                                                             |
| rs1793038171 | intron_variant                                                                             |
| rs1793038907 | intron_variant                                                                             |

|              |                |
|--------------|----------------|
| rs1793039096 | intron_variant |
| rs1793040437 | intron_variant |
| rs1793040543 | intron_variant |
| rs1793040665 | intron_variant |
| rs1793041289 | intron_variant |
| rs1793042245 | intron_variant |
| rs1793042410 | intron_variant |
| rs1793042595 | intron_variant |
| rs1793042926 | intron_variant |
| rs1793043155 | intron_variant |
| rs1793043400 | intron_variant |
| rs1793043615 | intron_variant |
| rs1793043724 | intron_variant |
| rs1793043842 | intron_variant |
| rs1793044347 | intron_variant |
| rs1793044855 | intron_variant |
| rs1793045858 | intron_variant |
| rs1793046379 | intron_variant |
| rs1793046490 | intron_variant |
| rs1793047303 | intron_variant |
| rs1793047521 | intron_variant |
| rs1793047633 | intron_variant |
| rs1793047966 | intron_variant |
| rs1793048092 | intron_variant |
| rs1793048210 | intron_variant |
| rs1793048741 | intron_variant |
| rs1793048857 | intron_variant |
| rs1793048991 | intron_variant |
| rs1793049194 | intron_variant |
| rs1793049314 | intron_variant |
| rs1793049481 | intron_variant |
| rs1793049665 | intron_variant |
| rs1793050087 | intron_variant |
| rs1793050268 | intron_variant |
| rs1793051777 | intron_variant |
| rs1793053054 | intron_variant |
| rs1793053934 | intron_variant |
| rs1793054114 | intron_variant |
| rs1793054278 | intron_variant |
| rs1793054578 | intron_variant |
| rs1793054945 | intron_variant |
| rs1793055116 | intron_variant |
| rs1793055461 | intron_variant |
| rs1793055819 | intron_variant |
| rs1793055979 | intron_variant |
| rs1793056213 | intron_variant |
| rs1793056395 | intron_variant |
| rs1793056740 | intron_variant |
| rs1793056889 | intron_variant |
| rs1793057246 | intron_variant |
| rs1793057424 | intron_variant |
| rs1793057751 | intron_variant |
| rs1793059577 | intron_variant |
| rs1793060122 | intron_variant |
| rs1793060947 | intron_variant |
| rs1793061051 | intron_variant |
| rs1793061711 | intron_variant |
| rs1793062251 | intron_variant |
| rs1793062400 | intron_variant |
| rs1793062759 | intron_variant |
| rs1793063307 | intron_variant |
| rs1793063614 | intron_variant |
| rs1793064341 | intron_variant |
| rs1793065173 | intron_variant |
| rs1793065501 | intron_variant |
| rs1793066515 | intron_variant |
| rs1793066615 | intron_variant |
| rs1793066721 | intron_variant |
| rs1793067019 | intron_variant |
| rs1793067476 | intron_variant |
| rs1793067584 | intron_variant |
| rs1793067888 | intron_variant |
| rs1793068243 | intron_variant |
| rs1793068690 | intron_variant |

|              |                |
|--------------|----------------|
| rs1793069924 | intron_variant |
| rs1793070010 | intron_variant |
| rs1793070220 | intron_variant |
| rs1793070313 | intron_variant |
| rs1793070873 | intron_variant |
| rs1793070987 | intron_variant |
| rs1793071303 | intron_variant |
| rs1793071418 | intron_variant |
| rs1793071526 | intron_variant |
| rs1793071854 | intron_variant |
| rs1793071964 | intron_variant |
| rs1793072158 | intron_variant |
| rs1793072245 | intron_variant |
| rs1793072663 | intron_variant |
| rs1793072843 | intron_variant |
| rs1793073157 | intron_variant |
| rs1793073267 | intron_variant |
| rs1793074172 | intron_variant |
| rs1793074336 | intron_variant |
| rs1793074521 | intron_variant |
| rs1793074848 | intron_variant |
| rs1793076774 | intron_variant |
| rs1793077247 | intron_variant |
| rs1793077388 | intron_variant |
| rs1793077693 | intron_variant |
| rs1793077980 | intron_variant |
| rs1793078475 | intron_variant |
| rs1793079456 | intron_variant |
| rs1793079624 | intron_variant |
| rs1793079770 | intron_variant |
| rs1793079930 | intron_variant |
| rs1793080854 | intron_variant |
| rs1793081132 | intron_variant |
| rs1793082056 | intron_variant |
| rs1793082723 | intron_variant |
| rs1793083022 | intron_variant |
| rs1793083529 | intron_variant |
| rs1793084274 | intron_variant |
| rs1793084586 | intron_variant |
| rs1793084916 | intron_variant |
| rs1793085764 | intron_variant |
| rs1793085896 | intron_variant |
| rs1793085989 | intron_variant |
| rs1793086510 | intron_variant |
| rs1793086681 | intron_variant |
| rs1793086825 | intron_variant |
| rs1793087734 | intron_variant |
| rs1793088071 | intron_variant |
| rs1793088242 | intron_variant |
| rs1793088543 | intron_variant |
| rs1793088880 | intron_variant |
| rs1793089401 | intron_variant |
| rs1793089881 | intron_variant |
| rs1793090222 | intron_variant |
| rs1793091510 | intron_variant |
| rs1793091679 | intron_variant |
| rs1793091828 | intron_variant |
| rs1793091986 | intron_variant |
| rs1793092157 | intron_variant |
| rs1793092787 | intron_variant |
| rs1793092926 | intron_variant |
| rs1793093250 | intron_variant |
| rs1793093676 | intron_variant |
| rs1793094071 | intron_variant |
| rs1793094493 | intron_variant |
| rs1793094570 | intron_variant |
| rs1793094788 | intron_variant |
| rs1793095914 | intron_variant |
| rs1793096040 | intron_variant |
| rs1793096148 | intron_variant |
| rs1793096705 | intron_variant |
| rs1793097023 | intron_variant |
| rs1793097309 | intron_variant |
| rs1793097510 | intron_variant |

|              |                |
|--------------|----------------|
| rs1793097893 | intron_variant |
| rs1793097998 | intron_variant |
| rs1793098093 | intron_variant |
| rs1793098186 | intron_variant |
| rs1793098490 | intron_variant |
| rs1793098593 | intron_variant |
| rs1793098879 | intron_variant |
| rs1793098983 | intron_variant |
| rs1793099319 | intron_variant |
| rs1793099566 | intron_variant |
| rs1793099668 | intron_variant |
| rs1793099829 | intron_variant |
| rs1793100711 | intron_variant |
| rs1793100882 | intron_variant |
| rs1793101066 | intron_variant |
| rs1793101222 | intron_variant |
| rs1793103028 | intron_variant |
| rs1793103160 | intron_variant |
| rs1793103465 | intron_variant |
| rs1793103802 | intron_variant |
| rs1793104266 | intron_variant |
| rs1793104396 | intron_variant |
| rs1793104615 | intron_variant |
| rs1793104955 | intron_variant |
| rs1793105058 | intron_variant |
| rs1793105144 | intron_variant |
| rs1793105906 | intron_variant |
| rs1793106131 | intron_variant |
| rs1793106226 | intron_variant |
| rs1793106938 | intron_variant |
| rs1793107048 | intron_variant |
| rs1793108088 | intron_variant |
| rs1793108293 | intron_variant |
| rs1793108398 | intron_variant |
| rs1793108958 | intron_variant |
| rs1793109857 | intron_variant |
| rs1793110793 | intron_variant |
| rs1793111353 | intron_variant |
| rs1793112098 | intron_variant |
| rs1793112212 | intron_variant |
| rs1793112621 | intron_variant |
| rs1793113782 | intron_variant |
| rs1793113882 | intron_variant |
| rs1793114668 | intron_variant |
| rs1793114878 | intron_variant |
| rs1793115006 | intron_variant |
| rs1793115124 | intron_variant |
| rs1793115550 | intron_variant |
| rs1793115638 | intron_variant |
| rs1793116041 | intron_variant |
| rs1793116135 | intron_variant |
| rs1793116227 | intron_variant |
| rs1793116536 | intron_variant |
| rs1793116917 | intron_variant |
| rs1793117755 | intron_variant |
| rs1793117964 | intron_variant |
| rs1793118052 | intron_variant |
| rs1793118260 | intron_variant |
| rs1793118883 | intron_variant |
| rs1793118972 | intron_variant |
| rs1793119176 | intron_variant |
| rs1793119494 | intron_variant |
| rs1793119866 | intron_variant |
| rs1793119967 | intron_variant |
| rs1793120227 | intron_variant |
| rs1793120631 | intron_variant |
| rs1793120732 | intron_variant |
| rs1793120844 | intron_variant |
| rs1793121431 | intron_variant |
| rs1793122060 | intron_variant |
| rs1793122154 | intron_variant |
| rs1793122263 | intron_variant |
| rs1793122348 | intron_variant |
| rs1793122461 | intron_variant |

|              |                |
|--------------|----------------|
| rs1793122562 | intron_variant |
| rs1793122675 | intron_variant |
| rs1793122783 | intron_variant |
| rs1793122959 | intron_variant |
| rs1793123054 | intron_variant |
| rs1793124126 | intron_variant |
| rs1793124623 | intron_variant |
| rs1793124718 | intron_variant |
| rs1793124842 | intron_variant |
| rs1793125790 | intron_variant |
| rs1793125908 | intron_variant |
| rs1793126341 | intron_variant |
| rs1793126558 | intron_variant |
| rs1793127327 | intron_variant |
| rs1793127448 | intron_variant |
| rs1793129542 | intron_variant |
| rs1793129637 | intron_variant |
| rs1793129729 | intron_variant |
| rs1793130056 | intron_variant |
| rs1793130267 | intron_variant |
| rs1793130595 | intron_variant |
| rs1793131031 | intron_variant |
| rs1793131528 | intron_variant |
| rs1793132129 | intron_variant |
| rs1793132299 | intron_variant |
| rs1793132456 | intron_variant |
| rs1793132632 | intron_variant |
| rs1793132773 | intron_variant |
| rs1793133055 | intron_variant |
| rs1793133211 | intron_variant |
| rs1793133380 | intron_variant |
| rs1793133547 | intron_variant |
| rs1793133682 | intron_variant |
| rs1793133860 | intron_variant |
| rs1793133962 | intron_variant |
| rs1793134363 | intron_variant |
| rs1793134676 | intron_variant |
| rs1793134778 | intron_variant |
| rs1793135260 | intron_variant |
| rs1793136058 | intron_variant |
| rs1793136397 | intron_variant |
| rs1793137032 | intron_variant |
| rs1793137453 | intron_variant |
| rs1793137707 | intron_variant |
| rs1793137809 | intron_variant |
| rs1793138115 | intron_variant |
| rs1793138232 | intron_variant |
| rs1793138537 | intron_variant |
| rs1793138634 | intron_variant |
| rs1793138831 | intron_variant |
| rs1793139140 | intron_variant |
| rs1793140093 | intron_variant |
| rs1793140961 | intron_variant |
| rs1793141141 | intron_variant |
| rs1793141338 | intron_variant |
| rs1793141833 | intron_variant |
| rs1793142091 | intron_variant |
| rs1793142410 | intron_variant |
| rs1793142497 | intron_variant |
| rs1793142712 | intron_variant |
| rs1793143048 | intron_variant |
| rs1793143541 | intron_variant |
| rs1793143643 | intron_variant |
| rs1793143757 | intron_variant |
| rs1793143838 | intron_variant |
| rs1793143941 | intron_variant |
| rs1793144596 | intron_variant |
| rs1793145517 | intron_variant |
| rs1793145854 | intron_variant |
| rs1793145942 | intron_variant |
| rs1793146220 | intron_variant |
| rs1793146332 | intron_variant |
| rs1793146751 | intron_variant |
| rs1793146852 | intron_variant |

|              |                |
|--------------|----------------|
| rs1793147162 | intron_variant |
| rs1793147247 | intron_variant |
| rs1793147358 | intron_variant |
| rs1793147761 | intron_variant |
| rs1793147847 | intron_variant |
| rs1793147944 | intron_variant |
| rs1793148138 | intron_variant |
| rs1793148900 | intron_variant |
| rs1793149488 | intron_variant |
| rs1793149697 | intron_variant |
| rs1793150944 | intron_variant |
| rs1793151082 | intron_variant |
| rs1793151761 | intron_variant |
| rs1793152328 | intron_variant |
| rs1793152412 | intron_variant |
| rs1793152728 | intron_variant |
| rs1793152919 | intron_variant |
| rs1793153182 | intron_variant |
| rs1793154178 | intron_variant |
| rs1793154268 | intron_variant |
| rs1793154546 | intron_variant |
| rs1793154654 | intron_variant |
| rs1793155085 | intron_variant |
| rs1793155285 | intron_variant |
| rs1793155608 | intron_variant |
| rs1793155817 | intron_variant |
| rs1793156577 | intron_variant |
| rs1793156786 | intron_variant |
| rs1793156888 | intron_variant |
| rs1793157235 | intron_variant |
| rs1793157328 | intron_variant |
| rs1793157429 | intron_variant |
| rs1793157536 | intron_variant |
| rs1793158115 | intron_variant |
| rs1793158420 | intron_variant |
| rs1793158523 | intron_variant |
| rs1793159092 | intron_variant |
| rs1793159193 | intron_variant |
| rs1793159282 | intron_variant |
| rs1793159640 | intron_variant |
| rs1793160277 | intron_variant |
| rs1793160768 | intron_variant |
| rs1793160888 | intron_variant |
| rs1793161135 | intron_variant |
| rs1793161477 | intron_variant |
| rs1793161868 | intron_variant |
| rs1793162143 | intron_variant |
| rs1793162572 | intron_variant |
| rs1793163218 | intron_variant |
| rs1793165724 | intron_variant |
| rs1793166062 | intron_variant |
| rs1793166359 | intron_variant |
| rs1793166444 | intron_variant |
| rs1793166658 | intron_variant |
| rs1793166885 | intron_variant |
| rs1793167397 | intron_variant |
| rs1793167477 | intron_variant |
| rs1793167572 | intron_variant |
| rs1793169344 | intron_variant |
| rs1793170176 | intron_variant |
| rs1793170552 | intron_variant |
| rs1793170741 | intron_variant |
| rs1793170910 | intron_variant |
| rs1793171042 | intron_variant |
| rs1793171152 | intron_variant |
| rs1793171573 | intron_variant |
| rs1793172119 | intron_variant |
| rs1793172223 | intron_variant |
| rs1793172423 | intron_variant |
| rs1793172527 | intron_variant |
| rs1793172620 | intron_variant |
| rs1793172834 | intron_variant |
| rs1793172934 | intron_variant |
| rs1793173054 | intron_variant |

|              |                |
|--------------|----------------|
| rs1793173632 | intron_variant |
| rs1793173846 | intron_variant |
| rs1793174268 | intron_variant |
| rs1793174509 | intron_variant |
| rs1793174837 | intron_variant |
| rs1793174959 | intron_variant |
| rs1793175254 | intron_variant |
| rs1793175868 | intron_variant |
| rs1793175974 | intron_variant |
| rs1793176271 | intron_variant |
| rs1793176373 | intron_variant |
| rs1793176468 | intron_variant |
| rs1793176795 | intron_variant |
| rs1793177135 | intron_variant |
| rs1793177352 | intron_variant |
| rs1793177893 | intron_variant |
| rs1793178124 | intron_variant |
| rs1793179071 | intron_variant |
| rs1793179374 | intron_variant |
| rs1793179460 | intron_variant |
| rs1793179557 | intron_variant |
| rs1793179646 | intron_variant |
| rs1793179858 | intron_variant |
| rs1793179958 | intron_variant |
| rs1793180057 | intron_variant |
| rs1793181035 | intron_variant |
| rs1793181144 | intron_variant |
| rs1793181230 | intron_variant |
| rs1793181340 | intron_variant |
| rs1793181589 | intron_variant |
| rs1793182550 | intron_variant |
| rs1793182761 | intron_variant |
| rs1793182858 | intron_variant |
| rs1793182944 | intron_variant |
| rs1793183042 | intron_variant |
| rs1793183362 | intron_variant |
| rs1793183463 | intron_variant |
| rs1793183893 | intron_variant |
| rs1793184118 | intron_variant |
| rs1793184231 | intron_variant |
| rs1793184777 | intron_variant |
| rs1793184872 | intron_variant |
| rs1793184980 | intron_variant |
| rs1793185086 | intron_variant |
| rs1793185189 | intron_variant |
| rs1793185705 | intron_variant |
| rs1793185944 | intron_variant |
| rs1793186147 | intron_variant |
| rs1793186552 | intron_variant |
| rs1793186662 | intron_variant |
| rs1793186802 | intron_variant |
| rs1793187002 | intron_variant |
| rs1793187243 | intron_variant |
| rs1793187646 | intron_variant |
| rs1793188122 | intron_variant |
| rs1793188276 | intron_variant |
| rs1793189289 | intron_variant |
| rs1793191569 | intron_variant |
| rs1793191630 | intron_variant |
| rs1793192079 | intron_variant |
| rs1793192388 | intron_variant |
| rs1793192674 | intron_variant |
| rs1793193213 | intron_variant |
| rs1793193346 | intron_variant |
| rs1793193557 | intron_variant |
| rs1793194651 | intron_variant |
| rs1793194841 | intron_variant |
| rs1793195040 | intron_variant |
| rs1793195616 | intron_variant |
| rs1793195945 | intron_variant |
| rs1793196055 | intron_variant |
| rs1793196517 | intron_variant |
| rs1793197587 | intron_variant |
| rs1793197810 | intron_variant |

|              |                |
|--------------|----------------|
| rs1793197924 | intron_variant |
| rs1793198947 | intron_variant |
| rs1793199047 | intron_variant |
| rs1793199148 | intron_variant |
| rs1793199240 | intron_variant |
| rs1793199819 | intron_variant |
| rs1793200356 | intron_variant |
| rs1793201042 | intron_variant |
| rs1793201362 | intron_variant |
| rs1793201730 | intron_variant |
| rs1793201901 | intron_variant |
| rs1793202209 | intron_variant |
| rs1793202303 | intron_variant |
| rs1793202411 | intron_variant |
| rs1793202772 | intron_variant |
| rs1793203072 | intron_variant |
| rs1793203162 | intron_variant |
| rs1793203381 | intron_variant |
| rs1793203485 | intron_variant |
| rs1793203862 | intron_variant |
| rs1793204527 | intron_variant |
| rs1793204608 | intron_variant |
| rs1793204705 | intron_variant |
| rs1793204806 | intron_variant |
| rs1793204893 | intron_variant |
| rs1793204989 | intron_variant |
| rs1793205277 | intron_variant |
| rs1793205549 | intron_variant |
| rs1793205769 | intron_variant |
| rs1793205969 | intron_variant |
| rs1793206336 | intron_variant |
| rs1793206421 | intron_variant |
| rs1793207273 | intron_variant |
| rs1793207464 | intron_variant |
| rs1793207556 | intron_variant |
| rs1793207659 | intron_variant |
| rs1793207984 | intron_variant |
| rs1793208839 | intron_variant |
| rs1793209066 | intron_variant |
| rs1793209256 | intron_variant |
| rs1793209385 | intron_variant |
| rs1793209484 | intron_variant |
| rs1793209668 | intron_variant |
| rs1793209961 | intron_variant |
| rs1793210470 | intron_variant |
| rs1793210550 | intron_variant |
| rs1793210694 | intron_variant |
| rs1793210889 | intron_variant |
| rs1793211319 | intron_variant |
| rs1793211878 | intron_variant |
| rs1793211974 | intron_variant |
| rs1793212063 | intron_variant |
| rs1793212409 | intron_variant |
| rs1793212690 | intron_variant |
| rs1793212977 | intron_variant |
| rs1793213067 | intron_variant |
| rs1793213161 | intron_variant |
| rs1793213464 | intron_variant |
| rs1793213753 | intron_variant |
| rs1793213933 | intron_variant |
| rs1793214012 | intron_variant |
| rs1793214308 | intron_variant |
| rs1793214626 | intron_variant |
| rs1793215323 | intron_variant |
| rs1793215533 | intron_variant |
| rs1793215739 | intron_variant |
| rs1793216061 | intron_variant |
| rs1793216398 | intron_variant |
| rs1793216788 | intron_variant |
| rs1793217129 | intron_variant |
| rs1793217901 | intron_variant |
| rs1793218014 | intron_variant |
| rs1793219002 | intron_variant |
| rs1793219168 | intron_variant |

|              |                |
|--------------|----------------|
| rs1793219502 | intron_variant |
| rs1793219638 | intron_variant |
| rs1793219965 | intron_variant |
| rs1793220121 | intron_variant |
| rs1793220503 | intron_variant |
| rs1793221291 | intron_variant |
| rs1793221453 | intron_variant |
| rs1793221621 | intron_variant |
| rs1793221788 | intron_variant |
| rs1793221937 | intron_variant |
| rs1793223305 | intron_variant |
| rs1793223619 | intron_variant |
| rs1793224264 | intron_variant |
| rs1793224771 | intron_variant |
| rs1793225111 | intron_variant |
| rs1793225758 | intron_variant |
| rs1793226642 | intron_variant |
| rs1793227300 | intron_variant |
| rs1793227626 | intron_variant |
| rs1793227930 | intron_variant |
| rs1793228231 | intron_variant |
| rs1793228401 | intron_variant |
| rs1793228754 | intron_variant |
| rs1793228919 | intron_variant |
| rs1793230020 | intron_variant |
| rs1793230179 | intron_variant |
| rs1793230357 | intron_variant |
| rs1793231200 | intron_variant |
| rs1793231509 | intron_variant |
| rs1793232189 | intron_variant |
| rs1793232492 | intron_variant |
| rs1793233709 | intron_variant |
| rs1793234044 | intron_variant |
| rs1793234181 | intron_variant |
| rs1793235192 | intron_variant |
| rs1793235679 | intron_variant |
| rs1793235785 | intron_variant |
| rs1793236343 | intron_variant |
| rs1793237066 | intron_variant |
| rs1793237169 | intron_variant |
| rs1793237277 | intron_variant |
| rs1793237609 | intron_variant |
| rs1793237903 | intron_variant |
| rs1793238013 | intron_variant |
| rs1793238293 | intron_variant |
| rs1793238712 | intron_variant |
| rs1793238840 | intron_variant |
| rs1793239445 | intron_variant |
| rs1793239625 | intron_variant |
| rs1793239996 | intron_variant |
| rs1793240081 | intron_variant |
| rs1793240209 | intron_variant |
| rs1793240371 | intron_variant |
| rs1793241012 | intron_variant |
| rs1793241136 | intron_variant |
| rs1793241300 | intron_variant |
| rs1793241449 | intron_variant |
| rs1793242131 | intron_variant |
| rs1793242220 | intron_variant |
| rs1793242302 | intron_variant |
| rs1793242470 | intron_variant |
| rs1793242641 | intron_variant |
| rs1793243156 | intron_variant |
| rs1793243622 | intron_variant |
| rs1793244209 | intron_variant |
| rs1793244346 | intron_variant |
| rs1793244632 | intron_variant |
| rs1793246189 | intron_variant |
| rs1793246325 | intron_variant |
| rs1793246598 | intron_variant |
| rs1793246759 | intron_variant |
| rs1793247207 | intron_variant |
| rs1793247334 | intron_variant |
| rs1793248173 | intron_variant |

|              |                |
|--------------|----------------|
| rs1793248490 | intron_variant |
| rs1793248990 | intron_variant |
| rs1793249611 | intron_variant |
| rs1793249929 | intron_variant |
| rs1793250090 | intron_variant |
| rs1793250558 | intron_variant |
| rs1793250864 | intron_variant |
| rs1793251408 | intron_variant |
| rs1793251620 | intron_variant |
| rs1793251969 | intron_variant |
| rs1793252513 | intron_variant |
| rs1793252678 | intron_variant |
| rs1793253318 | intron_variant |
| rs1793253471 | intron_variant |
| rs1793253836 | intron_variant |
| rs1793254314 | intron_variant |
| rs1793256449 | intron_variant |
| rs1793257457 | intron_variant |
| rs1793257732 | intron_variant |
| rs1793258041 | intron_variant |
| rs1793258207 | intron_variant |
| rs1793258548 | intron_variant |
| rs1793259388 | intron_variant |
| rs1793260091 | intron_variant |
| rs1793260551 | intron_variant |
| rs1793260692 | intron_variant |
| rs1793262043 | intron_variant |
| rs1793262397 | intron_variant |
| rs1793262501 | intron_variant |
| rs1793262601 | intron_variant |
| rs1793262839 | intron_variant |
| rs1793264478 | intron_variant |
| rs1793265173 | intron_variant |
| rs1793266341 | intron_variant |
| rs1793266951 | intron_variant |
| rs1793267046 | intron_variant |
| rs1793267158 | intron_variant |
| rs1793267297 | intron_variant |
| rs1793267545 | intron_variant |
| rs1793268055 | intron_variant |
| rs1793269347 | intron_variant |
| rs1793269722 | intron_variant |
| rs1793269904 | intron_variant |
| rs1793270074 | intron_variant |
| rs1793270253 | intron_variant |
| rs1793272827 | intron_variant |
| rs1793273269 | intron_variant |
| rs1793273753 | intron_variant |
| rs1793274288 | intron_variant |
| rs1793275957 | intron_variant |
| rs1793276140 | intron_variant |
| rs1793276313 | intron_variant |
| rs1793276644 | intron_variant |
| rs1793276802 | intron_variant |
| rs1793277403 | intron_variant |
| rs1793278999 | intron_variant |
| rs1793279326 | intron_variant |
| rs1793280408 | intron_variant |
| rs1793281288 | intron_variant |
| rs1793281651 | intron_variant |
| rs1793282367 | intron_variant |
| rs1793282724 | intron_variant |
| rs1793283054 | intron_variant |
| rs1793283538 | intron_variant |
| rs1793283674 | intron_variant |
| rs1793284016 | intron_variant |
| rs1793284240 | intron_variant |
| rs1793284344 | intron_variant |
| rs1793284898 | intron_variant |
| rs1793285502 | intron_variant |
| rs1793287287 | intron_variant |
| rs1793288011 | intron_variant |
| rs1793289837 | intron_variant |
| rs1793290016 | intron_variant |

|              |                |
|--------------|----------------|
| rs1793290236 | intron_variant |
| rs1793291137 | intron_variant |
| rs1793291465 | intron_variant |
| rs1793291693 | intron_variant |
| rs1793291821 | intron_variant |
| rs1793292062 | intron_variant |
| rs1793292279 | intron_variant |
| rs1793292372 | intron_variant |
| rs1793292575 | intron_variant |
| rs1793292669 | intron_variant |
| rs1793292989 | intron_variant |
| rs1793293393 | intron_variant |
| rs1793294405 | intron_variant |
| rs1793294721 | intron_variant |
| rs1793295088 | intron_variant |
| rs1793295406 | intron_variant |
| rs1793296144 | intron_variant |
| rs1793296328 | intron_variant |
| rs1793296956 | intron_variant |
| rs1793297078 | intron_variant |
| rs1793297219 | intron_variant |
| rs1793297360 | intron_variant |
| rs1793297733 | intron_variant |
| rs1793298421 | intron_variant |
| rs1793298985 | intron_variant |
| rs1793299273 | intron_variant |
| rs1793299484 | intron_variant |
| rs1793299688 | intron_variant |
| rs1793299794 | intron_variant |
| rs1793299898 | intron_variant |
| rs1793300238 | intron_variant |
| rs1793300473 | intron_variant |
| rs1793300602 | intron_variant |
| rs1793300702 | intron_variant |
| rs1793300798 | intron_variant |
| rs1793301015 | intron_variant |
| rs1793301188 | intron_variant |
| rs1793301707 | intron_variant |
| rs1793301877 | intron_variant |
| rs1793303387 | intron_variant |
| rs1793303862 | intron_variant |
| rs1793311164 | intron_variant |
| rs1793311356 | intron_variant |
| rs1793311788 | intron_variant |
| rs1793313050 | intron_variant |
| rs1793313385 | intron_variant |
| rs1793313568 | intron_variant |
| rs1793313956 | intron_variant |
| rs1793314333 | intron_variant |
| rs1793314451 | intron_variant |
| rs1793314687 | intron_variant |
| rs1793315175 | intron_variant |
| rs1793315282 | intron_variant |
| rs1793316274 | intron_variant |
| rs1793316361 | intron_variant |
| rs1793316610 | intron_variant |
| rs1793316773 | intron_variant |
| rs1793317166 | intron_variant |
| rs1793317665 | intron_variant |
| rs1793318010 | intron_variant |
| rs1793318902 | intron_variant |
| rs1793319293 | intron_variant |
| rs1793320317 | intron_variant |
| rs1793320651 | intron_variant |
| rs1793320771 | intron_variant |
| rs1793320908 | intron_variant |
| rs1793321407 | intron_variant |
| rs1793321747 | intron_variant |
| rs1793321915 | intron_variant |
| rs1793322454 | intron_variant |
| rs1793322619 | intron_variant |
| rs1793323438 | intron_variant |
| rs1793323774 | intron_variant |
| rs1793324092 | intron_variant |

|              |                |
|--------------|----------------|
| rs1793324240 | intron_variant |
| rs1793324392 | intron_variant |
| rs1793324882 | intron_variant |
| rs1793325057 | intron_variant |
| rs1793325397 | intron_variant |
| rs1793325749 | intron_variant |
| rs1793326529 | intron_variant |
| rs1793327246 | intron_variant |
| rs1793327403 | intron_variant |
| rs1793328624 | intron_variant |
| rs1793328792 | intron_variant |
| rs1793329315 | intron_variant |
| rs1793329993 | intron_variant |
| rs1793331348 | intron_variant |
| rs1793331989 | intron_variant |
| rs1793332323 | intron_variant |
| rs1793332480 | intron_variant |
| rs1793332664 | intron_variant |
| rs1793332827 | intron_variant |
| rs1793333203 | intron_variant |
| rs1793335672 | intron_variant |
| rs1793336213 | intron_variant |
| rs1793336670 | intron_variant |
| rs1793337413 | intron_variant |
| rs1793337755 | intron_variant |
| rs1793338258 | intron_variant |
| rs1793338422 | intron_variant |
| rs1793338586 | intron_variant |
| rs1793339449 | intron_variant |
| rs1793339625 | intron_variant |
| rs1793340450 | intron_variant |
| rs1793341015 | intron_variant |
| rs1793341550 | intron_variant |
| rs1793341724 | intron_variant |
| rs1793341891 | intron_variant |
| rs1793342593 | intron_variant |
| rs1793342689 | intron_variant |
| rs1793342845 | intron_variant |
| rs1793342967 | intron_variant |
| rs1793343135 | intron_variant |
| rs1793343638 | intron_variant |
| rs1793343748 | intron_variant |
| rs1793344399 | intron_variant |
| rs1793344623 | intron_variant |
| rs1793344728 | intron_variant |
| rs1793344829 | intron_variant |
| rs1793346006 | intron_variant |
| rs1793346812 | intron_variant |
| rs1793346916 | intron_variant |
| rs1793347034 | intron_variant |
| rs1793347391 | intron_variant |
| rs1793347592 | intron_variant |
| rs1793347802 | intron_variant |
| rs1793348086 | intron_variant |
| rs1793348184 | intron_variant |
| rs1793348378 | intron_variant |
| rs1793348489 | intron_variant |
| rs1793348943 | intron_variant |
| rs1793349040 | intron_variant |
| rs1793349756 | intron_variant |
| rs1793349863 | intron_variant |
| rs1793349962 | intron_variant |
| rs1793350150 | intron_variant |
| rs1793350538 | intron_variant |
| rs1793351454 | intron_variant |
| rs1793351911 | intron_variant |
| rs1793352340 | intron_variant |
| rs1793352588 | intron_variant |
| rs1793352802 | intron_variant |
| rs1793352905 | intron_variant |
| rs1793353039 | intron_variant |
| rs1793353766 | intron_variant |
| rs1793353967 | intron_variant |
| rs1793354830 | intron_variant |

|              |                                                                          |
|--------------|--------------------------------------------------------------------------|
| rs1793355031 | intron_variant                                                           |
| rs1793355422 | intron_variant                                                           |
| rs1793355517 | intron_variant                                                           |
| rs1793355598 | intron_variant                                                           |
| rs1793355992 | intron_variant                                                           |
| rs1793356194 | intron_variant                                                           |
| rs1793356700 | intron_variant                                                           |
| rs1793357039 | intron_variant                                                           |
| rs1793357138 | intron_variant                                                           |
| rs1793357339 | intron_variant                                                           |
| rs1793358083 | intron_variant                                                           |
| rs1793358186 | intron_variant                                                           |
| rs1793358391 | intron_variant                                                           |
| rs1793358487 | intron_variant                                                           |
| rs1793358582 | intron_variant                                                           |
| rs1793358778 | intron_variant                                                           |
| rs1793359543 | intron_variant                                                           |
| rs1793359810 | intron_variant                                                           |
| rs1793360555 | intron_variant                                                           |
| rs1793360883 | intron_variant                                                           |
| rs1793361015 | intron_variant                                                           |
| rs1793361588 | intron_variant                                                           |
| rs1793362566 | intron_variant                                                           |
| rs1793364401 | intron_variant                                                           |
| rs1793364507 | intron_variant                                                           |
| rs1793364737 | intron_variant                                                           |
| rs1793365015 | intron_variant                                                           |
| rs1793366150 | intron_variant                                                           |
| rs1793366347 | intron_variant                                                           |
| rs1793366627 | intron_variant                                                           |
| rs1793366724 | intron_variant                                                           |
| rs1793366822 | intron_variant                                                           |
| rs1793366936 | intron_variant                                                           |
| rs1793367190 | intron_variant                                                           |
| rs1793367425 | intron_variant                                                           |
| rs1793367675 | intron_variant                                                           |
| rs1793367771 | intron_variant                                                           |
| rs1793368399 | intron_variant                                                           |
| rs1793368866 | intron_variant                                                           |
| rs1793369093 | intron_variant                                                           |
| rs1793369223 | intron_variant                                                           |
| rs1793369380 | intron_variant                                                           |
| rs1793370288 | intron_variant                                                           |
| rs1793370992 | intron_variant                                                           |
| rs1793371323 | intron_variant                                                           |
| rs1793371649 | intron_variant                                                           |
| rs1793372229 | intron_variant                                                           |
| rs1793372385 | intron_variant                                                           |
| rs1793372534 | intron_variant                                                           |
| rs1793373294 | intron_variant                                                           |
| rs1793373485 | intron_variant                                                           |
| rs1793373596 | intron_variant                                                           |
| rs1793373759 | intron_variant                                                           |
| rs1793374549 | intron_variant                                                           |
| rs1793374649 | intron_variant                                                           |
| rs1793375186 | intron_variant                                                           |
| rs1793375292 | intron_variant                                                           |
| rs1793375404 | intron_variant                                                           |
| rs1793378689 | non_coding_transcript_variant,coding_sequence_variant,missense_variant   |
| rs1793379665 | non_coding_transcript_variant,coding_sequence_variant,missense_variant   |
| rs1793379901 | synonymous_variant,non_coding_transcript_variant,coding_sequence_variant |
| rs1793380314 | stop_gained,non_coding_transcript_variant,coding_sequence_variant        |
| rs1793382118 | non_coding_transcript_variant,coding_sequence_variant,missense_variant   |
| rs1793383550 | synonymous_variant,non_coding_transcript_variant,coding_sequence_variant |
| rs1793386405 | non_coding_transcript_variant,coding_sequence_variant,missense_variant   |
| rs1793386951 | intron_variant                                                           |
| rs1793387320 | intron_variant                                                           |
| rs1793388710 | intron_variant                                                           |
| rs1793389661 | intron_variant                                                           |
| rs1793389859 | intron_variant                                                           |
| rs1793390211 | intron_variant                                                           |
| rs1793390892 | intron_variant                                                           |
| rs1793391307 | intron_variant                                                           |
| rs1793391740 | intron_variant                                                           |

|              |                                                                          |
|--------------|--------------------------------------------------------------------------|
| rs1793392185 | intron_variant                                                           |
| rs1793392387 | intron_variant                                                           |
| rs1793392503 | intron_variant                                                           |
| rs1793392715 | intron_variant                                                           |
| rs1793393027 | intron_variant                                                           |
| rs1793393794 | intron_variant                                                           |
| rs1793394829 | intron_variant                                                           |
| rs1793394941 | intron_variant                                                           |
| rs1793395050 | intron_variant                                                           |
| rs1793395265 | intron_variant                                                           |
| rs1793395792 | intron_variant                                                           |
| rs1793395882 | intron_variant                                                           |
| rs1793396086 | intron_variant                                                           |
| rs1793397079 | intron_variant                                                           |
| rs1793397273 | intron_variant                                                           |
| rs1793397750 | intron_variant                                                           |
| rs1793399087 | intron_variant                                                           |
| rs1793399419 | intron_variant                                                           |
| rs1793400059 | intron_variant                                                           |
| rs1793400381 | intron_variant                                                           |
| rs1793401182 | intron_variant                                                           |
| rs1793401283 | intron_variant                                                           |
| rs1793401392 | intron_variant                                                           |
| rs1793401604 | intron_variant                                                           |
| rs1793403146 | intron_variant                                                           |
| rs1793403352 | intron_variant                                                           |
| rs1793404010 | intron_variant                                                           |
| rs1793404123 | intron_variant                                                           |
| rs1793404309 | intron_variant                                                           |
| rs1793404469 | intron_variant                                                           |
| rs1793404599 | intron_variant                                                           |
| rs1793404715 | intron_variant                                                           |
| rs1793404949 | intron_variant                                                           |
| rs1793405065 | intron_variant                                                           |
| rs1793405264 | intron_variant                                                           |
| rs1793405467 | intron_variant                                                           |
| rs1793405677 | intron_variant                                                           |
| rs1793406030 | intron_variant                                                           |
| rs1793406115 | intron_variant                                                           |
| rs1793406226 | intron_variant                                                           |
| rs1793406506 | intron_variant                                                           |
| rs1793406607 | intron_variant                                                           |
| rs1793406978 | intron_variant                                                           |
| rs1793407286 | intron_variant                                                           |
| rs1793407396 | intron_variant                                                           |
| rs1793407599 | intron_variant                                                           |
| rs1793408044 | intron_variant                                                           |
| rs1793408296 | intron_variant                                                           |
| rs1793408596 | intron_variant                                                           |
| rs1793408697 | intron_variant                                                           |
| rs1793409252 | intron_variant                                                           |
| rs1793409666 | intron_variant                                                           |
| rs1793409810 | intron_variant                                                           |
| rs1793410267 | intron_variant                                                           |
| rs1793410812 | intron_variant                                                           |
| rs1793411050 | intron_variant                                                           |
| rs1793411650 | intron_variant                                                           |
| rs1793411906 | intron_variant                                                           |
| rs1793412085 | intron_variant                                                           |
| rs1793412194 | intron_variant                                                           |
| rs1793412298 | intron_variant                                                           |
| rs1793412602 | intron_variant                                                           |
| rs1793414330 | intron_variant                                                           |
| rs1793415550 | intron_variant                                                           |
| rs1793415901 | intron_variant                                                           |
| rs1793415997 | intron_variant                                                           |
| rs1793416195 | intron_variant                                                           |
| rs1793416384 | intron_variant                                                           |
| rs1793416503 | intron_variant                                                           |
| rs1793417127 | intron_variant                                                           |
| rs1793417875 | non_coding_transcript_variant,coding_sequence_variant,missense_variant   |
| rs1793418268 | frameshift_variant,non_coding_transcript_variant,coding_sequence_variant |
| rs1793418893 | non_coding_transcript_variant,coding_sequence_variant,missense_variant   |
| rs1793420750 | non_coding_transcript_variant,coding_sequence_variant,missense_variant   |

|              |                                                                        |
|--------------|------------------------------------------------------------------------|
| rs1793421740 | non_coding_transcript_variant,coding_sequence_variant,missense_variant |
| rs1793422861 | stop_gained,non_coding_transcript_variant,coding_sequence_variant      |
| rs1793429138 | non_coding_transcript_variant,coding_sequence_variant,missense_variant |
| rs1793429447 | splice_donor_variant                                                   |
| rs1793431001 | intron_variant                                                         |
| rs1793431467 | intron_variant                                                         |
| rs1793432087 | intron_variant                                                         |
| rs1793432617 | intron_variant                                                         |
| rs1793433395 | intron_variant                                                         |
| rs1793434714 | intron_variant                                                         |
| rs1793434810 | intron_variant                                                         |
| rs1793435799 | intron_variant                                                         |
| rs1793436087 | intron_variant                                                         |
| rs1793438424 | intron_variant                                                         |
| rs1793438871 | intron_variant                                                         |
| rs1793439766 | intron_variant                                                         |
| rs1793439953 | intron_variant                                                         |
| rs1793440048 | intron_variant                                                         |
| rs1793440390 | intron_variant                                                         |
| rs1793440482 | intron_variant                                                         |
| rs1793440573 | intron_variant                                                         |
| rs1793440674 | intron_variant                                                         |
| rs1793441066 | intron_variant                                                         |
| rs1793442008 | intron_variant                                                         |
| rs1793443673 | intron_variant                                                         |
| rs1793443772 | intron_variant                                                         |
| rs1793443956 | intron_variant                                                         |
| rs1793444324 | intron_variant                                                         |
| rs1793444527 | intron_variant                                                         |
| rs1793444625 | intron_variant                                                         |
| rs1793444714 | intron_variant                                                         |
| rs1793444917 | intron_variant                                                         |
| rs1793445364 | intron_variant                                                         |
| rs1793446495 | intron_variant                                                         |
| rs1793446633 | intron_variant                                                         |
| rs1793446849 | intron_variant                                                         |
| rs1793447059 | intron_variant                                                         |
| rs1793448491 | intron_variant                                                         |
| rs1793448640 | intron_variant                                                         |
| rs1793448792 | intron_variant                                                         |
| rs1793448948 | intron_variant                                                         |
| rs1793449118 | intron_variant                                                         |
| rs1793449403 | intron_variant                                                         |
| rs1793449568 | intron_variant                                                         |
| rs1793449716 | intron_variant                                                         |
| rs1793450021 | intron_variant                                                         |
| rs1793450115 | intron_variant                                                         |
| rs1793450200 | intron_variant                                                         |
| rs1793450874 | intron_variant                                                         |
| rs1793452535 | intron_variant                                                         |
| rs1793452630 | intron_variant                                                         |
| rs1793452974 | intron_variant                                                         |
| rs1793453066 | intron_variant                                                         |
| rs1793453279 | intron_variant                                                         |
| rs1793453531 | intron_variant                                                         |
| rs1793453866 | intron_variant                                                         |
| rs1793453973 | intron_variant                                                         |
| rs1793454365 | intron_variant                                                         |
| rs1793455187 | intron_variant                                                         |
| rs1793455295 | intron_variant                                                         |
| rs1793456334 | intron_variant                                                         |
| rs1793456524 | intron_variant                                                         |
| rs1793456728 | intron_variant                                                         |
| rs1793457222 | intron_variant                                                         |
| rs1793458177 | intron_variant                                                         |
| rs1793458498 | intron_variant                                                         |
| rs1793458973 | intron_variant                                                         |
| rs1793459071 | intron_variant                                                         |
| rs1793459421 | intron_variant                                                         |
| rs1793459737 | intron_variant                                                         |
| rs1793459873 | intron_variant                                                         |
| rs1793460214 | intron_variant                                                         |
| rs1793461272 | intron_variant                                                         |
| rs1793461723 | intron_variant                                                         |

|              |                |
|--------------|----------------|
| rs1793462031 | intron_variant |
| rs1793463531 | intron_variant |
| rs1793463818 | intron_variant |
| rs1793463926 | intron_variant |
| rs1793464205 | intron_variant |
| rs1793464994 | intron_variant |
| rs1793465699 | intron_variant |
| rs1793466014 | intron_variant |
| rs1793466670 | intron_variant |
| rs1793467141 | intron_variant |
| rs1793468879 | intron_variant |
| rs1793469370 | intron_variant |
| rs1793470264 | intron_variant |
| rs1793470607 | intron_variant |
| rs1793470715 | intron_variant |
| rs1793470925 | intron_variant |
| rs1793471154 | intron_variant |
| rs1793471452 | intron_variant |
| rs1793471554 | intron_variant |
| rs1793471774 | intron_variant |
| rs1793471866 | intron_variant |
| rs1793472264 | intron_variant |
| rs1793473989 | intron_variant |
| rs1793474159 | intron_variant |
| rs1793474520 | intron_variant |
| rs1793474949 | intron_variant |
| rs1793475642 | intron_variant |
| rs1793475746 | intron_variant |
| rs1793475818 | intron_variant |
| rs1793476024 | intron_variant |
| rs1793476543 | intron_variant |
| rs1793476662 | intron_variant |
| rs1793476908 | intron_variant |
| rs1793477069 | intron_variant |
| rs1793477806 | intron_variant |
| rs1793477953 | intron_variant |
| rs1793478108 | intron_variant |
| rs1793478249 | intron_variant |
| rs1793478806 | intron_variant |
| rs1793480109 | intron_variant |
| rs1793480699 | intron_variant |
| rs1793481499 | intron_variant |
| rs1793481596 | intron_variant |
| rs1793481698 | intron_variant |
| rs1793481896 | intron_variant |
| rs1793481997 | intron_variant |
| rs1793482193 | intron_variant |
| rs1793482312 | intron_variant |
| rs1793482432 | intron_variant |
| rs1793483054 | intron_variant |
| rs1793483141 | intron_variant |
| rs1793483329 | intron_variant |
| rs1793483522 | intron_variant |
| rs1793483611 | intron_variant |
| rs1793484223 | intron_variant |
| rs1793484641 | intron_variant |
| rs1793485103 | intron_variant |
| rs1793485694 | intron_variant |
| rs1793486753 | intron_variant |
| rs1793487190 | intron_variant |
| rs1793487346 | intron_variant |
| rs1793487996 | intron_variant |
| rs1793488273 | intron_variant |
| rs1793488630 | intron_variant |
| rs1793489274 | intron_variant |
| rs1793489429 | intron_variant |
| rs1793489750 | intron_variant |
| rs1793489916 | intron_variant |
| rs1793490278 | intron_variant |
| rs1793490770 | intron_variant |
| rs1793491246 | intron_variant |
| rs1793491612 | intron_variant |
| rs1793491774 | intron_variant |
| rs1793492127 | intron_variant |

|              |                |
|--------------|----------------|
| rs1793492592 | intron_variant |
| rs1793492761 | intron_variant |
| rs1793493340 | intron_variant |
| rs1793493950 | intron_variant |
| rs1793494459 | intron_variant |
| rs1793494616 | intron_variant |
| rs1793494946 | intron_variant |
| rs1793495114 | intron_variant |
| rs1793495457 | intron_variant |
| rs1793495651 | intron_variant |
| rs1793495801 | intron_variant |
| rs1793495958 | intron_variant |
| rs1793496109 | intron_variant |
| rs1793497197 | intron_variant |
| rs1793498311 | intron_variant |
| rs1793498497 | intron_variant |
| rs1793499053 | intron_variant |
| rs1793499379 | intron_variant |
| rs1793499766 | intron_variant |
| rs1793499978 | intron_variant |
| rs1793500248 | intron_variant |
| rs1793500476 | intron_variant |
| rs1793500928 | intron_variant |
| rs1793501690 | intron_variant |
| rs1793502333 | intron_variant |
| rs1793502678 | intron_variant |
| rs1793502843 | intron_variant |
| rs1793503600 | intron_variant |
| rs1793503781 | intron_variant |
| rs1793503956 | intron_variant |
| rs1793504466 | intron_variant |
| rs1793504923 | intron_variant |
| rs1793505141 | intron_variant |
| rs1793505229 | intron_variant |
| rs1793505346 | intron_variant |
| rs1793505844 | intron_variant |
| rs1793506160 | intron_variant |
| rs1793506259 | intron_variant |
| rs1793506978 | intron_variant |
| rs1793507141 | intron_variant |
| rs1793507238 | intron_variant |
| rs1793507339 | intron_variant |
| rs1793507570 | intron_variant |
| rs1793507663 | intron_variant |
| rs1793507885 | intron_variant |
| rs1793508423 | intron_variant |
| rs1793508539 | intron_variant |
| rs1793508645 | intron_variant |
| rs1793508800 | intron_variant |
| rs1793510002 | intron_variant |
| rs1793510336 | intron_variant |
| rs1793510499 | intron_variant |
| rs1793510927 | intron_variant |
| rs1793511080 | intron_variant |
| rs1793511377 | intron_variant |
| rs1793511740 | intron_variant |
| rs1793512182 | intron_variant |
| rs1793513313 | intron_variant |
| rs1793513468 | intron_variant |
| rs1793513921 | intron_variant |
| rs1793514481 | intron_variant |
| rs1793514783 | intron_variant |
| rs1793515126 | intron_variant |
| rs1793515955 | intron_variant |
| rs1793516087 | intron_variant |
| rs1793516741 | intron_variant |
| rs1793517112 | intron_variant |
| rs1793517753 | intron_variant |
| rs1793517913 | intron_variant |
| rs1793518377 | intron_variant |
| rs1793518880 | intron_variant |
| rs1793519035 | intron_variant |
| rs1793519563 | intron_variant |
| rs1793519881 | intron_variant |

|              |                |
|--------------|----------------|
| rs1793520261 | intron_variant |
| rs1793520419 | intron_variant |
| rs1793521010 | intron_variant |
| rs1793521175 | intron_variant |
| rs1793521573 | intron_variant |
| rs1793521899 | intron_variant |
| rs1793522085 | intron_variant |
| rs1793522166 | intron_variant |
| rs1793522663 | intron_variant |
| rs1793522756 | intron_variant |
| rs1793522857 | intron_variant |
| rs1793523059 | intron_variant |
| rs1793523749 | intron_variant |
| rs1793523855 | intron_variant |
| rs1793525002 | intron_variant |
| rs1793525249 | intron_variant |
| rs1793525471 | intron_variant |
| rs1793526402 | intron_variant |
| rs1793526506 | intron_variant |
| rs1793526599 | intron_variant |
| rs1793526957 | intron_variant |
| rs1793527061 | intron_variant |
| rs1793527382 | intron_variant |
| rs1793527493 | intron_variant |
| rs1793527594 | intron_variant |
| rs1793527670 | intron_variant |
| rs1793527854 | intron_variant |
| rs1793527942 | intron_variant |
| rs1793528149 | intron_variant |
| rs1793528428 | intron_variant |
| rs1793528536 | intron_variant |
| rs1793529489 | intron_variant |
| rs1793529591 | intron_variant |
| rs1793529725 | intron_variant |
| rs1793529812 | intron_variant |
| rs1793530197 | intron_variant |
| rs1793531262 | intron_variant |
| rs1793531569 | intron_variant |
| rs1793531667 | intron_variant |
| rs1793532032 | intron_variant |
| rs1793534158 | intron_variant |
| rs1793534572 | intron_variant |
| rs1793534688 | intron_variant |
| rs1793535006 | intron_variant |
| rs1793535487 | intron_variant |
| rs1793535572 | intron_variant |
| rs1793535810 | intron_variant |
| rs1793536036 | intron_variant |
| rs1793536796 | intron_variant |
| rs1793537595 | intron_variant |
| rs1793537676 | intron_variant |
| rs1793538017 | intron_variant |
| rs1793538513 | intron_variant |
| rs1793538610 | intron_variant |
| rs1793538709 | intron_variant |
| rs1793539127 | intron_variant |
| rs1793539470 | intron_variant |
| rs1793539662 | intron_variant |
| rs1793540442 | intron_variant |
| rs1793540830 | intron_variant |
| rs1793540925 | intron_variant |
| rs1793541219 | intron_variant |
| rs1793541295 | intron_variant |
| rs1793541383 | intron_variant |
| rs1793541488 | intron_variant |
| rs1793541711 | intron_variant |
| rs1793541910 | intron_variant |
| rs1793542371 | intron_variant |
| rs1793542480 | intron_variant |
| rs1793542585 | intron_variant |
| rs1793542817 | intron_variant |
| rs1793543041 | intron_variant |
| rs1793543488 | intron_variant |
| rs1793543945 | intron_variant |

|              |                |
|--------------|----------------|
| rs1793544022 | intron_variant |
| rs1793544379 | intron_variant |
| rs1793544564 | intron_variant |
| rs1793544666 | intron_variant |
| rs1793544773 | intron_variant |
| rs1793545403 | intron_variant |
| rs1793545796 | intron_variant |
| rs1793546206 | intron_variant |
| rs1793546313 | intron_variant |
| rs1793546713 | intron_variant |
| rs1793547045 | intron_variant |
| rs1793547264 | intron_variant |
| rs1793547545 | intron_variant |
| rs1793547936 | intron_variant |
| rs1793548158 | intron_variant |
| rs1793548257 | intron_variant |
| rs1793548461 | intron_variant |
| rs1793550108 | intron_variant |
| rs1793550428 | intron_variant |
| rs1793550524 | intron_variant |
| rs1793550854 | intron_variant |
| rs1793551078 | intron_variant |
| rs1793551187 | intron_variant |
| rs1793551925 | intron_variant |
| rs1793552459 | intron_variant |
| rs1793553621 | intron_variant |
| rs1793553847 | intron_variant |
| rs1793554885 | intron_variant |
| rs1793555294 | intron_variant |
| rs1793555714 | intron_variant |
| rs1793555910 | intron_variant |
| rs1793556396 | intron_variant |
| rs1793556592 | intron_variant |
| rs1793557010 | intron_variant |
| rs1793557110 | intron_variant |
| rs1793557225 | intron_variant |
| rs1793557327 | intron_variant |
| rs1793557429 | intron_variant |
| rs1793557808 | intron_variant |
| rs1793558070 | intron_variant |
| rs1793558525 | intron_variant |
| rs1793558672 | intron_variant |
| rs1793558773 | intron_variant |
| rs1793559817 | intron_variant |
| rs1793559908 | intron_variant |
| rs1793560229 | intron_variant |
| rs1793560517 | intron_variant |
| rs1793560627 | intron_variant |
| rs1793561491 | intron_variant |
| rs1793561796 | intron_variant |
| rs1793562028 | intron_variant |
| rs1793562209 | intron_variant |
| rs1793562865 | intron_variant |
| rs1793563060 | intron_variant |
| rs1793563157 | intron_variant |
| rs1793563965 | intron_variant |
| rs1793564533 | intron_variant |
| rs1793564725 | intron_variant |
| rs1793565461 | intron_variant |
| rs1793565901 | intron_variant |
| rs1793566438 | intron_variant |
| rs1793566860 | intron_variant |
| rs1793566957 | intron_variant |
| rs1793567282 | intron_variant |
| rs1793567483 | intron_variant |
| rs1793567675 | intron_variant |
| rs1793567778 | intron_variant |
| rs1793567876 | intron_variant |
| rs1793568091 | intron_variant |
| rs1793568557 | intron_variant |
| rs1793568932 | intron_variant |
| rs1793569149 | intron_variant |
| rs1793569359 | intron_variant |
| rs1793569470 | intron_variant |

|              |                |
|--------------|----------------|
| rs1793569580 | intron_variant |
| rs1793569973 | intron_variant |
| rs1793570392 | intron_variant |
| rs1793570495 | intron_variant |
| rs1793570647 | intron_variant |
| rs1793570799 | intron_variant |
| rs1793571795 | intron_variant |
| rs1793572106 | intron_variant |
| rs1793572452 | intron_variant |
| rs1793572616 | intron_variant |
| rs1793572756 | intron_variant |
| rs1793572934 | intron_variant |
| rs1793573079 | intron_variant |
| rs1793573240 | intron_variant |
| rs1793573380 | intron_variant |
| rs1793574055 | intron_variant |
| rs1793574738 | intron_variant |
| rs1793575490 | intron_variant |
| rs1793576152 | intron_variant |
| rs1793576295 | intron_variant |
| rs1793576451 | intron_variant |
| rs1793577725 | intron_variant |
| rs1793578066 | intron_variant |
| rs1793578357 | intron_variant |
| rs1793578512 | intron_variant |
| rs1793578704 | intron_variant |
| rs1793578802 | intron_variant |
| rs1793579538 | intron_variant |
| rs1793579807 | intron_variant |
| rs1793580005 | intron_variant |
| rs1793580810 | intron_variant |
| rs1793581336 | intron_variant |
| rs1793581715 | intron_variant |
| rs1793582157 | intron_variant |
| rs1793582371 | intron_variant |
| rs1793583308 | intron_variant |
| rs1793584495 | intron_variant |
| rs1793584599 | intron_variant |
| rs1793584699 | intron_variant |
| rs1793584833 | intron_variant |
| rs1793584926 | intron_variant |
| rs1793585032 | intron_variant |
| rs1793585584 | intron_variant |
| rs1793585793 | intron_variant |
| rs1793586335 | intron_variant |
| rs1793586484 | intron_variant |
| rs1793587074 | intron_variant |
| rs1793587251 | intron_variant |
| rs1793587428 | intron_variant |
| rs1793588163 | intron_variant |
| rs1793588826 | intron_variant |
| rs1793589021 | intron_variant |
| rs1793589131 | intron_variant |
| rs1793589439 | intron_variant |
| rs1793589743 | intron_variant |
| rs1793589911 | intron_variant |
| rs1793590933 | intron_variant |
| rs1793591084 | intron_variant |
| rs1793591585 | intron_variant |
| rs1793593735 | intron_variant |
| rs1793594100 | intron_variant |
| rs1793594309 | intron_variant |
| rs1793594777 | intron_variant |
| rs1793595160 | intron_variant |
| rs1793595323 | intron_variant |
| rs1793595535 | intron_variant |
| rs1793595859 | intron_variant |
| rs1793595988 | intron_variant |
| rs1793596331 | intron_variant |
| rs1793596644 | intron_variant |
| rs1793596803 | intron_variant |
| rs1793596942 | intron_variant |
| rs1793597067 | intron_variant |
| rs1793597739 | intron_variant |

|              |                |
|--------------|----------------|
| rs1793597903 | intron_variant |
| rs1793598263 | intron_variant |
| rs1793599384 | intron_variant |
| rs1793599551 | intron_variant |
| rs1793600427 | intron_variant |
| rs1793600604 | intron_variant |
| rs1793600779 | intron_variant |
| rs1793600932 | intron_variant |
| rs1793601090 | intron_variant |
| rs1793601237 | intron_variant |
| rs1793601729 | intron_variant |
| rs1793601914 | intron_variant |
| rs1793602454 | intron_variant |
| rs1793602957 | intron_variant |
| rs1793603598 | intron_variant |
| rs1793604573 | intron_variant |
| rs1793604872 | intron_variant |
| rs1793605037 | intron_variant |
| rs1793606190 | intron_variant |
| rs1793606381 | intron_variant |
| rs1793606572 | intron_variant |
| rs1793608283 | intron_variant |
| rs1793608366 | intron_variant |
| rs1793608568 | intron_variant |
| rs1793608857 | intron_variant |
| rs1793608949 | intron_variant |
| rs1793609656 | intron_variant |
| rs1793609772 | intron_variant |
| rs1793610565 | intron_variant |
| rs1793610663 | intron_variant |
| rs1793610766 | intron_variant |
| rs1793611340 | intron_variant |
| rs1793611855 | intron_variant |
| rs1793612057 | intron_variant |
| rs1793612287 | intron_variant |
| rs1793613329 | intron_variant |
| rs1793613510 | intron_variant |
| rs1793613612 | intron_variant |
| rs1793613808 | intron_variant |
| rs1793614049 | intron_variant |
| rs1793614440 | intron_variant |
| rs1793614546 | intron_variant |
| rs1793614628 | intron_variant |
| rs1793615241 | intron_variant |
| rs1793615606 | intron_variant |
| rs1793615904 | intron_variant |
| rs1793616577 | intron_variant |
| rs1793617147 | intron_variant |
| rs1793617500 | intron_variant |
| rs1793618014 | intron_variant |
| rs1793618803 | intron_variant |
| rs1793619077 | intron_variant |
| rs1793619318 | intron_variant |
| rs1793619795 | intron_variant |
| rs1793619903 | intron_variant |
| rs1793619988 | intron_variant |
| rs1793620313 | intron_variant |
| rs1793620734 | intron_variant |
| rs1793621134 | intron_variant |
| rs1793621561 | intron_variant |
| rs1793621664 | intron_variant |
| rs1793621775 | intron_variant |
| rs1793622207 | intron_variant |
| rs1793622420 | intron_variant |
| rs1793622512 | intron_variant |
| rs1793622614 | intron_variant |
| rs1793623097 | intron_variant |
| rs1793623308 | intron_variant |
| rs1793623697 | intron_variant |
| rs1793623905 | intron_variant |
| rs1793624108 | intron_variant |
| rs1793624328 | intron_variant |
| rs1793624399 | intron_variant |
| rs1793624686 | intron_variant |

|              |                |
|--------------|----------------|
| rs1793624745 | intron_variant |
| rs1793624896 | intron_variant |
| rs1793625199 | intron_variant |
| rs1793625488 | intron_variant |
| rs1793625573 | intron_variant |
| rs1793626027 | intron_variant |
| rs1793626118 | intron_variant |
| rs1793626219 | intron_variant |
| rs1793626825 | intron_variant |
| rs1793627058 | intron_variant |
| rs1793627133 | intron_variant |
| rs1793627305 | intron_variant |
| rs1793628058 | intron_variant |
| rs1793628283 | intron_variant |
| rs1793631588 | intron_variant |
| rs1793631882 | intron_variant |
| rs1793631983 | intron_variant |
| rs1793632221 | intron_variant |
| rs1793632322 | intron_variant |
| rs1793633581 | intron_variant |
| rs1793633893 | intron_variant |
| rs1793633998 | intron_variant |
| rs1793635374 | intron_variant |
| rs1793635547 | intron_variant |
| rs1793636522 | intron_variant |
| rs1793636719 | intron_variant |
| rs1793637060 | intron_variant |
| rs1793637511 | intron_variant |
| rs1793637700 | intron_variant |
| rs1793637836 | intron_variant |
| rs1793638732 | intron_variant |
| rs1793639732 | intron_variant |
| rs1793639878 | intron_variant |
| rs1793640565 | intron_variant |
| rs1793640733 | intron_variant |
| rs1793640883 | intron_variant |
| rs1793641043 | intron_variant |
| rs1793641488 | intron_variant |
| rs1793643061 | intron_variant |
| rs1793643140 | intron_variant |
| rs1793643383 | intron_variant |
| rs1793643465 | intron_variant |
| rs1793643576 | intron_variant |
| rs1793644019 | intron_variant |
| rs1793645131 | intron_variant |
| rs1793645236 | intron_variant |
| rs1793645480 | intron_variant |
| rs1793645834 | intron_variant |
| rs1793646210 | intron_variant |
| rs1793647549 | intron_variant |
| rs1793647787 | intron_variant |
| rs1793648632 | intron_variant |
| rs1793649506 | intron_variant |
| rs1793650709 | intron_variant |
| rs1793651235 | intron_variant |
| rs1793651786 | intron_variant |
| rs1793652254 | intron_variant |
| rs1793652419 | intron_variant |
| rs1793652934 | intron_variant |
| rs1793653895 | intron_variant |
| rs1793654032 | intron_variant |
| rs1793654192 | intron_variant |
| rs1793655572 | intron_variant |
| rs1793655850 | intron_variant |
| rs1793655969 | intron_variant |
| rs1793656427 | intron_variant |
| rs1793656903 | intron_variant |
| rs1793657049 | intron_variant |
| rs1793657333 | intron_variant |
| rs1793657600 | intron_variant |
| rs1793657787 | intron_variant |
| rs1793657934 | intron_variant |
| rs1793658098 | intron_variant |
| rs1793658225 | intron_variant |

|              |                |
|--------------|----------------|
| rs1793658377 | intron_variant |
| rs1793658675 | intron_variant |
| rs1793658799 | intron_variant |
| rs1793658906 | intron_variant |
| rs1793659026 | intron_variant |
| rs1793659143 | intron_variant |
| rs1793659630 | intron_variant |
| rs1793660233 | intron_variant |
| rs1793660882 | intron_variant |
| rs1793661639 | intron_variant |
| rs1793661940 | intron_variant |
| rs1793662081 | intron_variant |
| rs1793662229 | intron_variant |
| rs1793662395 | intron_variant |
| rs1793662561 | intron_variant |
| rs1793663244 | intron_variant |
| rs1793663468 | intron_variant |
| rs1793663920 | intron_variant |
| rs1793664081 | intron_variant |
| rs1793664246 | intron_variant |
| rs1793665287 | intron_variant |
| rs1793665566 | intron_variant |
| rs1793665969 | intron_variant |
| rs1793666450 | intron_variant |
| rs1793667098 | intron_variant |
| rs1793667271 | intron_variant |
| rs1793667587 | intron_variant |
| rs1793667757 | intron_variant |
| rs1793668076 | intron_variant |
| rs1793668185 | intron_variant |
| rs1793668546 | intron_variant |
| rs1793668813 | intron_variant |
| rs1793669296 | intron_variant |
| rs1793669412 | intron_variant |
| rs1793669585 | intron_variant |
| rs1793670143 | intron_variant |
| rs1793671126 | intron_variant |
| rs1793671501 | intron_variant |
| rs1793671601 | intron_variant |
| rs1793672110 | intron_variant |
| rs1793672217 | intron_variant |
| rs1793672596 | intron_variant |
| rs1793672931 | intron_variant |
| rs1793673073 | intron_variant |
| rs1793673179 | intron_variant |
| rs1793673256 | intron_variant |
| rs1793673456 | intron_variant |
| rs1793673752 | intron_variant |
| rs1793674040 | intron_variant |
| rs1793674423 | intron_variant |
| rs1793674656 | intron_variant |
| rs1793674855 | intron_variant |
| rs1793675127 | intron_variant |
| rs1793675217 | intron_variant |
| rs1793675453 | intron_variant |
| rs1793675615 | intron_variant |
| rs1793675698 | intron_variant |
| rs1793675793 | intron_variant |
| rs1793675871 | intron_variant |
| rs1793676051 | intron_variant |
| rs1793676303 | intron_variant |
| rs1793676436 | intron_variant |
| rs1793676582 | intron_variant |
| rs1793676717 | intron_variant |
| rs1793677028 | intron_variant |
| rs1793677566 | intron_variant |
| rs1793677852 | intron_variant |
| rs1793679747 | intron_variant |
| rs1793680560 | intron_variant |
| rs1793681066 | intron_variant |
| rs1793682004 | intron_variant |
| rs1793682143 | intron_variant |
| rs1793682310 | intron_variant |
| rs1793682519 | intron_variant |

|              |                |
|--------------|----------------|
| rs1793682679 | intron_variant |
| rs1793682823 | intron_variant |
| rs1793683021 | intron_variant |
| rs1793683496 | intron_variant |
| rs1793683609 | intron_variant |
| rs1793684022 | intron_variant |
| rs1793684269 | intron_variant |
| rs1793684403 | intron_variant |
| rs1793684524 | intron_variant |
| rs1793684658 | intron_variant |
| rs1793684777 | intron_variant |
| rs1793685172 | intron_variant |
| rs1793685275 | intron_variant |
| rs1793685389 | intron_variant |
| rs1793685957 | intron_variant |
| rs1793686093 | intron_variant |
| rs1793686267 | intron_variant |
| rs1793686599 | intron_variant |
| rs1793686755 | intron_variant |
| rs1793686897 | intron_variant |
| rs1793687419 | intron_variant |
| rs1793688338 | intron_variant |
| rs1793688830 | intron_variant |
| rs1793690500 | intron_variant |
| rs1793691179 | intron_variant |
| rs1793691923 | intron_variant |
| rs1793692256 | intron_variant |
| rs1793692588 | intron_variant |
| rs1793693028 | intron_variant |
| rs1793693725 | intron_variant |
| rs1793693856 | intron_variant |
| rs1793694037 | intron_variant |
| rs1793694324 | intron_variant |
| rs1793694467 | intron_variant |
| rs1793694787 | intron_variant |
| rs1793695306 | intron_variant |
| rs1793695614 | intron_variant |
| rs1793695779 | intron_variant |
| rs1793696184 | intron_variant |
| rs1793696265 | intron_variant |
| rs1793696356 | intron_variant |
| rs1793696645 | intron_variant |
| rs1793696844 | intron_variant |
| rs1793697448 | intron_variant |
| rs1793697738 | intron_variant |
| rs1793697834 | intron_variant |
| rs1793697950 | intron_variant |
| rs1793698112 | intron_variant |
| rs1793698358 | intron_variant |
| rs1793698565 | intron_variant |
| rs1793698642 | intron_variant |
| rs1793699119 | intron_variant |
| rs1793699822 | intron_variant |
| rs1793700258 | intron_variant |
| rs1793700630 | intron_variant |
| rs1793701279 | intron_variant |
| rs1793701379 | intron_variant |
| rs1793701490 | intron_variant |
| rs1793701714 | intron_variant |
| rs1793701819 | intron_variant |
| rs1793701947 | intron_variant |
| rs1793702753 | intron_variant |
| rs1793702866 | intron_variant |
| rs1793703198 | intron_variant |
| rs1793703860 | intron_variant |
| rs1793704215 | intron_variant |
| rs1793704596 | intron_variant |
| rs1793704879 | intron_variant |
| rs1793705320 | intron_variant |
| rs1793705406 | intron_variant |
| rs1793706209 | intron_variant |
| rs1793706438 | intron_variant |
| rs1793706648 | intron_variant |
| rs1793707036 | intron_variant |

|              |                |
|--------------|----------------|
| rs1793707742 | intron_variant |
| rs1793708066 | intron_variant |
| rs1793708354 | intron_variant |
| rs1793708448 | intron_variant |
| rs1793708623 | intron_variant |
| rs1793708793 | intron_variant |
| rs1793708885 | intron_variant |
| rs1793708984 | intron_variant |
| rs1793709701 | intron_variant |
| rs1793709810 | intron_variant |
| rs1793709903 | intron_variant |
| rs1793710034 | intron_variant |
| rs1793710457 | intron_variant |
| rs1793710984 | intron_variant |
| rs1793711066 | intron_variant |
| rs1793711197 | intron_variant |
| rs1793711299 | intron_variant |
| rs1793711508 | intron_variant |
| rs1793712499 | intron_variant |
| rs1793712679 | intron_variant |
| rs1793712777 | intron_variant |
| rs1793713418 | intron_variant |
| rs1793713770 | intron_variant |
| rs1793714097 | intron_variant |
| rs1793714241 | intron_variant |
| rs1793714583 | intron_variant |
| rs1793715096 | intron_variant |
| rs1793715406 | intron_variant |
| rs1793715595 | intron_variant |
| rs1793716256 | intron_variant |
| rs1793716769 | intron_variant |
| rs1793717506 | intron_variant |
| rs1793717889 | intron_variant |
| rs1793717989 | intron_variant |
| rs1793718093 | intron_variant |
| rs1793718339 | intron_variant |
| rs1793718545 | intron_variant |
| rs1793719004 | intron_variant |
| rs1793719143 | intron_variant |
| rs1793719705 | intron_variant |
| rs1793720645 | intron_variant |
| rs1793720833 | intron_variant |
| rs1793721239 | intron_variant |
| rs1793721960 | intron_variant |
| rs1793722484 | intron_variant |
| rs1793722670 | intron_variant |
| rs1793722785 | intron_variant |
| rs1793723019 | intron_variant |
| rs1793723230 | intron_variant |
| rs1793723618 | intron_variant |
| rs1793723718 | intron_variant |
| rs1793723824 | intron_variant |
| rs1793723936 | intron_variant |
| rs1793724041 | intron_variant |
| rs1793724341 | intron_variant |
| rs1793724436 | intron_variant |
| rs1793724540 | intron_variant |
| rs1793725371 | intron_variant |
| rs1793725689 | intron_variant |
| rs1793725944 | intron_variant |
| rs1793727780 | intron_variant |
| rs1793728058 | intron_variant |
| rs1793728413 | intron_variant |
| rs1793728620 | intron_variant |
| rs1793729270 | intron_variant |
| rs1793729541 | intron_variant |
| rs1793729969 | intron_variant |
| rs1793730062 | intron_variant |
| rs1793730503 | intron_variant |
| rs1793730975 | intron_variant |
| rs1793731177 | intron_variant |
| rs1793731523 | intron_variant |
| rs1793731931 | intron_variant |
| rs1793732029 | intron_variant |

|              |                |
|--------------|----------------|
| rs1793733189 | intron_variant |
| rs1793733486 | intron_variant |
| rs1793733896 | intron_variant |
| rs1793733990 | intron_variant |
| rs1793734094 | intron_variant |
| rs1793734187 | intron_variant |
| rs1793734294 | intron_variant |
| rs1793734874 | intron_variant |
| rs1793735383 | intron_variant |
| rs1793735769 | intron_variant |
| rs1793735842 | intron_variant |
| rs1793736138 | intron_variant |
| rs1793737597 | intron_variant |
| rs1793738144 | intron_variant |
| rs1793738295 | intron_variant |
| rs1793738569 | intron_variant |
| rs1793738933 | intron_variant |
| rs1793739217 | intron_variant |
| rs1793739287 | intron_variant |
| rs1793739791 | intron_variant |
| rs1793739874 | intron_variant |
| rs1793739975 | intron_variant |
| rs1793740202 | intron_variant |
| rs1793740311 | intron_variant |
| rs1793740500 | intron_variant |
| rs1793740931 | intron_variant |
| rs1793741042 | intron_variant |
| rs1793741151 | intron_variant |
| rs1793741251 | intron_variant |
| rs1793741456 | intron_variant |
| rs1793741634 | intron_variant |
| rs1793741856 | intron_variant |
| rs1793741963 | intron_variant |
| rs1793743179 | intron_variant |
| rs1793743750 | intron_variant |
| rs1793744280 | intron_variant |
| rs1793744821 | intron_variant |
| rs1793744935 | intron_variant |
| rs1793745291 | intron_variant |
| rs1793745492 | intron_variant |
| rs1793745612 | intron_variant |
| rs1793746074 | intron_variant |
| rs1793746389 | intron_variant |
| rs1793746546 | intron_variant |
| rs1793747213 | intron_variant |
| rs1793748482 | intron_variant |
| rs1793748611 | intron_variant |
| rs1793748852 | intron_variant |
| rs1793749582 | intron_variant |
| rs1793749696 | intron_variant |
| rs1793749809 | intron_variant |
| rs1793750362 | intron_variant |
| rs1793750603 | intron_variant |
| rs1793751156 | intron_variant |
| rs1793751249 | intron_variant |
| rs1793751354 | intron_variant |
| rs1793751575 | intron_variant |
| rs1793752172 | intron_variant |
| rs1793752259 | intron_variant |
| rs1793752415 | intron_variant |
| rs1793752589 | intron_variant |
| rs1793753294 | intron_variant |
| rs1793753435 | intron_variant |
| rs1793753714 | intron_variant |
| rs1793753959 | intron_variant |
| rs1793754160 | intron_variant |
| rs1793754802 | intron_variant |
| rs1793755133 | intron_variant |
| rs1793755824 | intron_variant |
| rs1793756254 | intron_variant |
| rs1793756373 | intron_variant |
| rs1793756528 | intron_variant |
| rs1793758156 | intron_variant |
| rs1793758368 | intron_variant |

|              |                |
|--------------|----------------|
| rs1793761146 | intron_variant |
| rs1793761493 | intron_variant |
| rs1793761671 | intron_variant |
| rs1793761996 | intron_variant |
| rs1793763126 | intron_variant |
| rs1793763492 | intron_variant |
| rs1793763956 | intron_variant |
| rs1793764257 | intron_variant |
| rs1793764415 | intron_variant |
| rs1793764717 | intron_variant |
| rs1793765225 | intron_variant |
| rs1793765386 | intron_variant |
| rs1793766885 | intron_variant |
| rs1793767013 | intron_variant |
| rs1793767149 | intron_variant |
| rs1793767892 | intron_variant |
| rs1793768699 | intron_variant |
| rs1793768867 | intron_variant |
| rs1793769987 | intron_variant |
| rs1793771648 | intron_variant |
| rs1793772117 | intron_variant |
| rs1793772238 | intron_variant |
| rs1793772796 | intron_variant |
| rs1793773069 | intron_variant |
| rs1793773176 | intron_variant |
| rs1793773616 | intron_variant |
| rs1793774086 | intron_variant |
| rs1793774193 | intron_variant |
| rs1793774310 | intron_variant |
| rs1793774418 | intron_variant |
| rs1793774675 | intron_variant |
| rs1793776072 | intron_variant |
| rs1793776178 | intron_variant |
| rs1793776802 | intron_variant |
| rs1793776901 | intron_variant |
| rs1793777403 | intron_variant |
| rs1793777510 | intron_variant |
| rs1793777799 | intron_variant |
| rs1793778108 | intron_variant |
| rs1793778339 | intron_variant |
| rs1793778546 | intron_variant |
| rs1793778633 | intron_variant |
| rs1793778727 | intron_variant |
| rs1793778827 | intron_variant |
| rs1793779160 | intron_variant |
| rs1793779330 | intron_variant |
| rs1793779495 | intron_variant |
| rs1793779869 | intron_variant |
| rs1793780449 | intron_variant |
| rs1793781135 | intron_variant |
| rs1793781303 | intron_variant |
| rs1793781615 | intron_variant |
| rs1793781775 | intron_variant |
| rs1793782376 | intron_variant |
| rs1793782704 | intron_variant |
| rs1793782864 | intron_variant |
| rs1793783544 | intron_variant |
| rs1793783728 | intron_variant |
| rs1793784197 | intron_variant |
| rs1793785481 | intron_variant |
| rs1793786048 | intron_variant |
| rs1793786380 | intron_variant |
| rs1793786520 | intron_variant |
| rs1793786666 | intron_variant |
| rs1793787287 | intron_variant |
| rs1793787592 | intron_variant |
| rs1793787753 | intron_variant |
| rs1793788347 | intron_variant |
| rs1793788640 | intron_variant |
| rs1793788783 | intron_variant |
| rs1793789107 | intron_variant |
| rs1793789394 | intron_variant |
| rs1793789541 | intron_variant |
| rs1793790003 | intron_variant |

|              |                |
|--------------|----------------|
| rs1793790481 | intron_variant |
| rs1793791299 | intron_variant |
| rs1793791405 | intron_variant |
| rs1793791570 | intron_variant |
| rs1793792613 | intron_variant |
| rs1793792903 | intron_variant |
| rs1793793044 | intron_variant |
| rs1793796074 | intron_variant |
| rs1793796251 | intron_variant |
| rs1793796686 | intron_variant |
| rs1793797505 | intron_variant |
| rs1793798111 | intron_variant |
| rs1793798589 | intron_variant |
| rs1793798751 | intron_variant |
| rs1793799472 | intron_variant |
| rs1793799617 | intron_variant |
| rs1793799790 | intron_variant |
| rs1793800149 | intron_variant |
| rs1793800276 | intron_variant |
| rs1793801743 | intron_variant |
| rs1793801901 | intron_variant |
| rs1793802362 | intron_variant |
| rs1793802526 | intron_variant |
| rs1793802687 | intron_variant |
| rs1793803006 | intron_variant |
| rs1793803187 | intron_variant |
| rs1793804098 | intron_variant |
| rs1793804260 | intron_variant |
| rs1793804555 | intron_variant |
| rs1793804819 | intron_variant |
| rs1793805267 | intron_variant |
| rs1793805428 | intron_variant |
| rs1793805596 | intron_variant |
| rs1793805743 | intron_variant |
| rs1793805907 | intron_variant |
| rs1793806069 | intron_variant |
| rs1793806679 | intron_variant |
| rs1793806801 | intron_variant |
| rs1793806985 | intron_variant |
| rs1793807302 | intron_variant |
| rs1793807445 | intron_variant |
| rs1793808229 | intron_variant |
| rs1793809153 | intron_variant |
| rs1793809305 | intron_variant |
| rs1793809621 | intron_variant |
| rs1793809880 | intron_variant |
| rs1793809994 | intron_variant |
| rs1793810630 | intron_variant |
| rs1793810977 | intron_variant |
| rs1793812005 | intron_variant |
| rs1793812151 | intron_variant |
| rs1793814480 | intron_variant |
| rs1793814634 | intron_variant |
| rs1793814790 | intron_variant |
| rs1793814936 | intron_variant |
| rs1793816532 | intron_variant |
| rs1793816683 | intron_variant |
| rs1793816908 | intron_variant |
| rs1793817735 | intron_variant |
| rs1793818023 | intron_variant |
| rs1793818410 | intron_variant |
| rs1793818782 | intron_variant |
| rs1793819496 | intron_variant |
| rs1793820069 | intron_variant |
| rs1793820168 | intron_variant |
| rs1793820264 | intron_variant |
| rs1793820645 | intron_variant |
| rs1793820741 | intron_variant |
| rs1793820827 | intron_variant |
| rs1793820934 | intron_variant |
| rs1793821034 | intron_variant |
| rs1793821698 | intron_variant |
| rs1793821820 | intron_variant |
| rs1793822323 | intron_variant |

|              |                |
|--------------|----------------|
| rs1793822414 | intron_variant |
| rs1793822624 | intron_variant |
| rs1793822832 | intron_variant |
| rs1793823376 | intron_variant |
| rs1793823558 | intron_variant |
| rs1793823648 | intron_variant |
| rs1793823745 | intron_variant |
| rs1793823964 | intron_variant |
| rs1793824060 | intron_variant |
| rs1793824847 | intron_variant |
| rs1793825133 | intron_variant |
| rs1793825436 | intron_variant |
| rs1793825546 | intron_variant |
| rs1793825844 | intron_variant |
| rs1793826133 | intron_variant |
| rs1793826583 | intron_variant |
| rs1793826867 | intron_variant |
| rs1793827307 | intron_variant |
| rs1793827720 | intron_variant |
| rs1793828216 | intron_variant |
| rs1793828319 | intron_variant |
| rs1793828397 | intron_variant |
| rs1793828595 | intron_variant |
| rs1793828878 | intron_variant |
| rs1793828965 | intron_variant |
| rs1793829066 | intron_variant |
| rs1793829152 | intron_variant |
| rs1793829692 | intron_variant |
| rs1793829791 | intron_variant |
| rs1793829891 | intron_variant |
| rs1793830204 | intron_variant |
| rs1793830559 | intron_variant |
| rs1793830817 | intron_variant |
| rs1793831029 | intron_variant |
| rs1793831323 | intron_variant |
| rs1793831760 | intron_variant |
| rs1793831835 | intron_variant |
| rs1793832298 | intron_variant |
| rs1793832587 | intron_variant |
| rs1793832993 | intron_variant |
| rs1793833796 | intron_variant |
| rs1793833890 | intron_variant |
| rs1793834390 | intron_variant |
| rs1793834494 | intron_variant |
| rs1793834590 | intron_variant |
| rs1793834694 | intron_variant |
| rs1793834785 | intron_variant |
| rs1793835313 | intron_variant |
| rs1793835511 | intron_variant |
| rs1793836227 | intron_variant |
| rs1793836922 | intron_variant |
| rs1793837015 | intron_variant |
| rs1793837535 | intron_variant |
| rs1793837641 | intron_variant |
| rs1793838483 | intron_variant |
| rs1793838683 | intron_variant |
| rs1793838788 | intron_variant |
| rs1793838882 | intron_variant |
| rs1793839221 | intron_variant |
| rs1793839766 | intron_variant |
| rs1793840143 | intron_variant |
| rs1793840245 | intron_variant |
| rs1793840692 | intron_variant |
| rs1793840993 | intron_variant |
| rs1793841187 | intron_variant |
| rs1793842160 | intron_variant |
| rs1793842512 | intron_variant |
| rs1793843211 | intron_variant |
| rs1793843420 | intron_variant |
| rs1793843615 | intron_variant |
| rs1793843924 | intron_variant |
| rs1793844022 | intron_variant |
| rs1793844449 | intron_variant |
| rs1793845031 | intron_variant |

|              |                |
|--------------|----------------|
| rs1793845263 | intron_variant |
| rs1793845380 | intron_variant |
| rs1793845497 | intron_variant |
| rs1793845597 | intron_variant |
| rs1793845798 | intron_variant |
| rs1793846104 | intron_variant |
| rs1793846230 | intron_variant |
| rs1793846495 | intron_variant |
| rs1793846741 | intron_variant |
| rs1793846851 | intron_variant |
| rs1793846947 | intron_variant |
| rs1793847045 | intron_variant |
| rs1793847161 | intron_variant |
| rs1793847464 | intron_variant |
| rs1793847561 | intron_variant |
| rs1793847906 | intron_variant |
| rs1793848026 | intron_variant |
| rs1793848494 | intron_variant |
| rs1793848607 | intron_variant |
| rs1793848863 | intron_variant |
| rs1793851226 | intron_variant |
| rs1793851702 | intron_variant |
| rs1793852198 | intron_variant |
| rs1793852395 | intron_variant |
| rs1793852836 | intron_variant |
| rs1793853044 | intron_variant |
| rs1793853151 | intron_variant |
| rs1793853251 | intron_variant |
| rs1793853786 | intron_variant |
| rs1793854375 | intron_variant |
| rs1793854688 | intron_variant |
| rs1793854882 | intron_variant |
| rs1793855702 | intron_variant |
| rs1793855942 | intron_variant |
| rs1793856035 | intron_variant |
| rs1793856141 | intron_variant |
| rs1793856425 | intron_variant |
| rs1793856635 | intron_variant |
| rs1793857766 | intron_variant |
| rs1793859131 | intron_variant |
| rs1793859234 | intron_variant |
| rs1793859335 | intron_variant |
| rs1793859697 | intron_variant |
| rs1793859808 | intron_variant |
| rs1793860158 | intron_variant |
| rs1793860722 | intron_variant |
| rs1793860832 | intron_variant |
| rs1793861033 | intron_variant |
| rs1793861163 | intron_variant |
| rs1793861256 | intron_variant |
| rs1793861471 | intron_variant |
| rs1793861567 | intron_variant |
| rs1793862217 | intron_variant |
| rs1793862395 | intron_variant |
| rs1793862719 | intron_variant |
| rs1793863026 | intron_variant |
| rs1793863652 | intron_variant |
| rs1793863891 | intron_variant |
| rs1793864083 | intron_variant |
| rs1793864397 | intron_variant |
| rs1793865388 | intron_variant |
| rs1793865985 | intron_variant |
| rs1793866495 | intron_variant |
| rs1793866888 | intron_variant |
| rs1793867481 | intron_variant |
| rs1793867597 | intron_variant |
| rs1793868705 | intron_variant |
| rs1793868816 | intron_variant |
| rs1793869401 | intron_variant |
| rs1793869534 | intron_variant |
| rs1793869633 | intron_variant |
| rs1793869732 | intron_variant |
| rs1793869954 | intron_variant |
| rs1793870059 | intron_variant |

|              |                |
|--------------|----------------|
| rs1793870278 | intron_variant |
| rs1793870390 | intron_variant |
| rs1793870489 | intron_variant |
| rs1793870588 | intron_variant |
| rs1793871089 | intron_variant |
| rs1793871413 | intron_variant |
| rs1793872441 | intron_variant |
| rs1793872552 | intron_variant |
| rs1793872774 | intron_variant |
| rs1793872884 | intron_variant |
| rs1793872992 | intron_variant |
| rs1793873385 | intron_variant |
| rs1793873482 | intron_variant |
| rs1793873890 | intron_variant |
| rs1793874091 | intron_variant |
| rs1793874181 | intron_variant |
| rs1793874484 | intron_variant |
| rs1793874680 | intron_variant |
| rs1793874784 | intron_variant |
| rs1793874884 | intron_variant |
| rs1793874972 | intron_variant |
| rs1793875368 | intron_variant |
| rs1793875476 | intron_variant |
| rs1793875578 | intron_variant |
| rs1793875752 | intron_variant |
| rs1793876148 | intron_variant |
| rs1793876283 | intron_variant |
| rs1793876379 | intron_variant |
| rs1793876716 | intron_variant |
| rs1793876827 | intron_variant |
| rs1793877310 | intron_variant |
| rs1793877401 | intron_variant |
| rs1793878194 | intron_variant |
| rs1793878302 | intron_variant |
| rs1793878613 | intron_variant |
| rs1793878705 | intron_variant |
| rs1793879100 | intron_variant |
| rs1793880248 | intron_variant |
| rs1793880353 | intron_variant |
| rs1793880446 | intron_variant |
| rs1793880674 | intron_variant |
| rs1793880874 | intron_variant |
| rs1793881002 | intron_variant |
| rs1793881736 | intron_variant |
| rs1793881950 | intron_variant |
| rs1793882230 | intron_variant |
| rs1793882338 | intron_variant |
| rs1793882538 | intron_variant |
| rs1793882732 | intron_variant |
| rs1793882846 | intron_variant |
| rs1793882941 | intron_variant |
| rs1793883064 | intron_variant |
| rs1793883612 | intron_variant |
| rs1793884197 | intron_variant |
| rs1793884302 | intron_variant |
| rs1793884780 | intron_variant |
| rs1793886085 | intron_variant |
| rs1793886407 | intron_variant |
| rs1793886730 | intron_variant |
| rs1793887486 | intron_variant |
| rs1793888265 | intron_variant |
| rs1793888418 | intron_variant |
| rs1793888649 | intron_variant |
| rs1793889064 | intron_variant |
| rs1793889213 | intron_variant |
| rs1793890243 | intron_variant |
| rs1793890675 | intron_variant |
| rs1793891477 | intron_variant |
| rs1793891573 | intron_variant |
| rs1793892202 | intron_variant |
| rs1793892353 | intron_variant |
| rs1793892500 | intron_variant |
| rs1793892670 | intron_variant |
| rs1793892804 | intron_variant |

|              |                |
|--------------|----------------|
| rs1793893437 | intron_variant |
| rs1793894610 | intron_variant |
| rs1793894889 | intron_variant |
| rs1793895048 | intron_variant |
| rs1793895324 | intron_variant |
| rs1793895807 | intron_variant |
| rs1793896148 | intron_variant |
| rs1793896907 | intron_variant |
| rs1793897236 | intron_variant |
| rs1793897553 | intron_variant |
| rs1793897709 | intron_variant |
| rs1793898236 | intron_variant |
| rs1793898770 | intron_variant |
| rs1793900422 | intron_variant |
| rs1793900571 | intron_variant |
| rs1793900860 | intron_variant |
| rs1793901005 | intron_variant |
| rs1793901538 | intron_variant |
| rs1793902017 | intron_variant |
| rs1793902494 | intron_variant |
| rs1793902827 | intron_variant |
| rs1793902977 | intron_variant |
| rs1793903139 | intron_variant |
| rs1793903299 | intron_variant |
| rs1793903462 | intron_variant |
| rs1793903875 | intron_variant |
| rs1793903981 | intron_variant |
| rs1793904764 | intron_variant |
| rs1793905058 | intron_variant |
| rs1793905242 | intron_variant |
| rs1793905431 | intron_variant |
| rs1793905518 | intron_variant |
| rs1793905608 | intron_variant |
| rs1793906284 | intron_variant |
| rs1793906776 | intron_variant |
| rs1793907382 | intron_variant |
| rs1793907571 | intron_variant |
| rs1793907772 | intron_variant |
| rs1793908412 | intron_variant |
| rs1793908520 | intron_variant |
| rs1793909069 | intron_variant |
| rs1793909495 | intron_variant |
| rs1793909625 | intron_variant |
| rs1793910181 | intron_variant |
| rs1793910513 | intron_variant |
| rs1793911023 | intron_variant |
| rs1793911630 | intron_variant |
| rs1793912647 | intron_variant |
| rs1793912840 | intron_variant |
| rs1793913157 | intron_variant |
| rs1793913248 | intron_variant |
| rs1793913341 | intron_variant |
| rs1793914869 | intron_variant |
| rs1793916030 | intron_variant |
| rs1793916494 | intron_variant |
| rs1793917087 | intron_variant |
| rs1793917540 | intron_variant |
| rs1793918195 | intron_variant |
| rs1793918820 | intron_variant |
| rs1793920687 | intron_variant |
| rs1793920839 | intron_variant |
| rs1793921140 | intron_variant |
| rs1793922902 | intron_variant |
| rs1793925321 | intron_variant |
| rs1793925611 | intron_variant |
| rs1793926151 | intron_variant |
| rs1793926292 | intron_variant |
| rs1793926447 | intron_variant |
| rs1793926924 | intron_variant |
| rs1793927085 | intron_variant |
| rs1793927241 | intron_variant |
| rs1793927387 | intron_variant |
| rs1793927544 | intron_variant |
| rs1793927875 | intron_variant |

|              |                |
|--------------|----------------|
| rs1793928790 | intron_variant |
| rs1793928914 | intron_variant |
| rs1793930645 | intron_variant |
| rs1793931195 | intron_variant |
| rs1793931277 | intron_variant |
| rs1793931493 | intron_variant |
| rs1793931817 | intron_variant |
| rs1793932705 | intron_variant |
| rs1793933016 | intron_variant |
| rs1793933823 | intron_variant |
| rs1793933966 | intron_variant |
| rs1793934561 | intron_variant |
| rs1793934657 | intron_variant |
| rs1793934817 | intron_variant |
| rs1793935084 | intron_variant |
| rs1793935565 | intron_variant |
| rs1793935736 | intron_variant |
| rs1793936004 | intron_variant |
| rs1793936149 | intron_variant |
| rs1793936536 | intron_variant |
| rs1793936632 | intron_variant |
| rs1793936721 | intron_variant |
| rs1793936906 | intron_variant |
| rs1793937342 | intron_variant |
| rs1793938146 | intron_variant |
| rs1793938298 | intron_variant |
| rs1793938480 | intron_variant |
| rs1793938760 | intron_variant |
| rs1793939217 | intron_variant |
| rs1793939291 | intron_variant |
| rs1793940564 | intron_variant |
| rs1793941092 | intron_variant |
| rs1793941398 | intron_variant |
| rs1793942186 | intron_variant |
| rs1793942542 | intron_variant |
| rs1793942989 | intron_variant |
| rs1793943129 | intron_variant |
| rs1793943580 | intron_variant |
| rs1793944516 | intron_variant |
| rs1793945044 | intron_variant |
| rs1793945240 | intron_variant |
| rs1793945679 | intron_variant |
| rs1793946109 | intron_variant |
| rs1793946778 | intron_variant |
| rs1793946865 | intron_variant |
| rs1793947040 | intron_variant |
| rs1793947493 | intron_variant |
| rs1793947829 | intron_variant |
| rs1793947925 | intron_variant |
| rs1793948016 | intron_variant |
| rs1793948198 | intron_variant |
| rs1793948292 | intron_variant |
| rs1793948778 | intron_variant |
| rs1793948942 | intron_variant |
| rs1793949076 | intron_variant |
| rs1793949226 | intron_variant |
| rs1793949766 | intron_variant |
| rs1793949909 | intron_variant |
| rs1793950074 | intron_variant |
| rs1793950228 | intron_variant |
| rs1793950499 | intron_variant |
| rs1793950649 | intron_variant |
| rs1793951149 | intron_variant |
| rs1793951312 | intron_variant |
| rs1793951876 | intron_variant |
| rs1793951996 | intron_variant |
| rs1793952124 | intron_variant |
| rs1793952498 | intron_variant |
| rs1793952600 | intron_variant |
| rs1793952694 | intron_variant |
| rs1793952780 | intron_variant |
| rs1793953018 | intron_variant |
| rs1793953207 | intron_variant |
| rs1793953514 | intron_variant |

|              |                |
|--------------|----------------|
| rs1793954198 | intron_variant |
| rs1793954675 | intron_variant |
| rs1793954761 | intron_variant |
| rs1793954925 | intron_variant |
| rs1793955159 | intron_variant |
| rs1793955268 | intron_variant |
| rs1793955341 | intron_variant |
| rs1793955437 | intron_variant |
| rs1793955972 | intron_variant |
| rs1793956145 | intron_variant |
| rs1793956451 | intron_variant |
| rs1793956728 | intron_variant |
| rs1793956815 | intron_variant |
| rs1793958228 | intron_variant |
| rs1793958549 | intron_variant |
| rs1793959106 | intron_variant |
| rs1793959580 | intron_variant |
| rs1793960846 | intron_variant |
| rs1793961425 | intron_variant |
| rs1793961884 | intron_variant |
| rs1793962028 | intron_variant |
| rs1793962334 | intron_variant |
| rs1793962757 | intron_variant |
| rs1793963059 | intron_variant |
| rs1793963242 | intron_variant |
| rs1793964395 | intron_variant |
| rs1793964505 | intron_variant |
| rs1793964676 | intron_variant |
| rs1793965945 | intron_variant |
| rs1793966439 | intron_variant |
| rs1793966580 | intron_variant |
| rs1793966863 | intron_variant |
| rs1793967024 | intron_variant |
| rs1793967159 | intron_variant |
| rs1793967302 | intron_variant |
| rs1793967456 | intron_variant |
| rs1793968117 | intron_variant |
| rs1793968255 | intron_variant |
| rs1793968399 | intron_variant |
| rs1793968540 | intron_variant |
| rs1793969226 | intron_variant |
| rs1793969425 | intron_variant |
| rs1793970097 | intron_variant |
| rs1793971501 | intron_variant |
| rs1793971846 | intron_variant |
| rs1793973513 | intron_variant |
| rs1793975645 | intron_variant |
| rs1793975805 | intron_variant |
| rs1793976295 | intron_variant |
| rs1793976850 | intron_variant |
| rs1793977121 | intron_variant |
| rs1793977383 | intron_variant |
| rs1793977699 | intron_variant |
| rs1793978120 | intron_variant |
| rs1793978188 | intron_variant |
| rs1793979871 | intron_variant |
| rs1793980039 | intron_variant |
| rs1793980976 | intron_variant |
| rs1793981464 | intron_variant |
| rs1793981609 | intron_variant |
| rs1793982173 | intron_variant |
| rs1793982322 | intron_variant |
| rs1793982823 | intron_variant |
| rs1793982970 | intron_variant |
| rs1793983649 | intron_variant |
| rs1793983801 | intron_variant |
| rs1793984575 | intron_variant |
| rs1793984728 | intron_variant |
| rs1793985189 | intron_variant |
| rs1793985657 | intron_variant |
| rs1793986740 | intron_variant |
| rs1793986884 | intron_variant |
| rs1793987183 | intron_variant |
| rs1793987440 | intron_variant |

|              |                |
|--------------|----------------|
| rs1793987769 | intron_variant |
| rs1793987979 | intron_variant |
| rs1793988285 | intron_variant |
| rs1793988562 | intron_variant |
| rs1793988659 | intron_variant |
| rs1793989184 | intron_variant |
| rs1793989383 | intron_variant |
| rs1793989473 | intron_variant |
| rs1793989999 | intron_variant |
| rs1793990638 | intron_variant |
| rs1793991608 | intron_variant |
| rs1793991774 | intron_variant |
| rs1793991944 | intron_variant |
| rs1793992118 | intron_variant |
| rs1793992853 | intron_variant |
| rs1793992936 | intron_variant |
| rs1793993129 | intron_variant |
| rs1793993305 | intron_variant |
| rs1793993493 | intron_variant |
| rs1793993663 | intron_variant |
| rs1793993944 | intron_variant |
| rs1793994573 | intron_variant |
| rs1793994750 | intron_variant |
| rs1793994839 | intron_variant |
| rs1793995215 | intron_variant |
| rs1793995417 | intron_variant |
| rs1793995630 | intron_variant |
| rs1793995728 | intron_variant |
| rs1793996448 | intron_variant |
| rs1793997065 | intron_variant |
| rs1793997220 | intron_variant |
| rs1793997377 | intron_variant |
| rs1793997675 | intron_variant |
| rs1793997929 | intron_variant |
| rs1793998944 | intron_variant |
| rs1793999258 | intron_variant |
| rs1793999944 | intron_variant |
| rs1794000089 | intron_variant |
| rs1794000386 | intron_variant |
| rs1794000533 | intron_variant |
| rs1794001447 | intron_variant |
| rs1794002235 | intron_variant |
| rs1794002906 | intron_variant |
| rs1794003060 | intron_variant |
| rs1794003977 | intron_variant |
| rs1794004465 | intron_variant |
| rs1794004771 | intron_variant |
| rs1794004913 | intron_variant |
| rs1794005228 | intron_variant |
| rs1794005395 | intron_variant |
| rs1794005540 | intron_variant |
| rs1794005822 | intron_variant |
| rs1794006440 | intron_variant |
| rs1794006551 | intron_variant |
| rs1794006714 | intron_variant |
| rs1794006859 | intron_variant |
| rs1794007007 | intron_variant |
| rs1794007265 | intron_variant |
| rs1794007417 | intron_variant |
| rs1794007736 | intron_variant |
| rs1794008026 | intron_variant |
| rs1794008866 | intron_variant |
| rs1794008976 | intron_variant |
| rs1794009532 | intron_variant |
| rs1794009639 | intron_variant |
| rs1794009831 | intron_variant |
| rs1794010051 | intron_variant |
| rs1794010354 | intron_variant |
| rs1794010559 | intron_variant |
| rs1794010790 | intron_variant |
| rs1794011002 | intron_variant |
| rs1794011499 | intron_variant |
| rs1794011631 | intron_variant |
| rs1794012153 | intron_variant |

|              |                |
|--------------|----------------|
| rs1794012326 | intron_variant |
| rs1794012545 | intron_variant |
| rs1794012655 | intron_variant |
| rs1794013404 | intron_variant |
| rs1794014206 | intron_variant |
| rs1794014395 | intron_variant |
| rs1794014874 | intron_variant |
| rs1794015695 | intron_variant |
| rs1794015844 | intron_variant |
| rs1794016731 | intron_variant |
| rs1794017414 | intron_variant |
| rs1794017675 | intron_variant |
| rs1794018313 | intron_variant |
| rs1794018648 | intron_variant |
| rs1794018823 | intron_variant |
| rs1794018920 | intron_variant |
| rs1794019361 | intron_variant |
| rs1794019877 | intron_variant |
| rs1794020243 | intron_variant |
| rs1794020335 | intron_variant |
| rs1794020416 | intron_variant |
| rs1794021035 | intron_variant |
| rs1794021208 | intron_variant |
| rs1794021294 | intron_variant |
| rs1794021385 | intron_variant |
| rs1794022172 | intron_variant |
| rs1794022264 | intron_variant |
| rs1794022521 | intron_variant |
| rs1794023073 | intron_variant |
| rs1794023243 | intron_variant |
| rs1794023322 | intron_variant |
| rs1794024080 | intron_variant |
| rs1794024348 | intron_variant |
| rs1794024543 | intron_variant |
| rs1794024878 | intron_variant |
| rs1794024959 | intron_variant |
| rs1794025057 | intron_variant |
| rs1794025146 | intron_variant |
| rs1794025442 | intron_variant |
| rs1794025532 | intron_variant |
| rs1794025854 | intron_variant |
| rs1794026333 | intron_variant |
| rs1794027330 | intron_variant |
| rs1794027432 | intron_variant |
| rs1794027518 | intron_variant |
| rs1794028260 | intron_variant |
| rs1794028813 | intron_variant |
| rs1794029262 | intron_variant |
| rs1794030023 | intron_variant |
| rs1794030210 | intron_variant |
| rs1794031560 | intron_variant |
| rs1794032030 | intron_variant |
| rs1794032113 | intron_variant |
| rs1794032217 | intron_variant |
| rs1794032499 | intron_variant |
| rs1794033090 | intron_variant |
| rs1794033325 | intron_variant |
| rs1794033643 | intron_variant |
| rs1794033957 | intron_variant |
| rs1794034048 | intron_variant |
| rs1794034861 | intron_variant |
| rs1794035067 | intron_variant |
| rs1794035365 | intron_variant |
| rs1794035726 | intron_variant |
| rs1794036077 | intron_variant |
| rs1794036369 | intron_variant |
| rs1794036655 | intron_variant |
| rs1794036979 | intron_variant |
| rs1794037317 | intron_variant |
| rs1794037583 | intron_variant |
| rs1794037987 | intron_variant |
| rs1794038499 | intron_variant |
| rs1794038590 | intron_variant |
| rs1794038696 | intron_variant |

|              |                |
|--------------|----------------|
| rs1794038974 | intron_variant |
| rs1794039293 | intron_variant |
| rs1794041012 | intron_variant |
| rs1794041311 | intron_variant |
| rs1794041405 | intron_variant |
| rs1794041718 | intron_variant |
| rs1794041815 | intron_variant |
| rs1794041908 | intron_variant |
| rs1794042004 | intron_variant |
| rs1794042667 | intron_variant |
| rs1794042888 | intron_variant |
| rs1794043035 | intron_variant |
| rs1794043834 | intron_variant |
| rs1794044006 | intron_variant |
| rs1794044162 | intron_variant |
| rs1794044640 | intron_variant |
| rs1794045120 | intron_variant |
| rs1794045433 | intron_variant |
| rs1794045582 | intron_variant |
| rs1794045744 | intron_variant |
| rs1794045890 | intron_variant |
| rs1794046204 | intron_variant |
| rs1794046351 | intron_variant |
| rs1794047791 | intron_variant |
| rs1794047960 | intron_variant |
| rs1794048100 | intron_variant |
| rs1794048780 | intron_variant |
| rs1794048941 | intron_variant |
| rs1794049525 | intron_variant |
| rs1794049675 | intron_variant |
| rs1794049929 | intron_variant |
| rs1794050230 | intron_variant |
| rs1794050665 | intron_variant |
| rs1794051031 | intron_variant |
| rs1794051168 | intron_variant |
| rs1794051867 | intron_variant |
| rs1794052006 | intron_variant |
| rs1794052326 | intron_variant |
| rs1794052419 | intron_variant |
| rs1794052610 | intron_variant |
| rs1794053196 | intron_variant |
| rs1794053476 | intron_variant |
| rs1794053576 | intron_variant |
| rs1794054042 | intron_variant |
| rs1794054552 | intron_variant |
| rs1794054792 | intron_variant |
| rs1794054886 | intron_variant |
| rs1794055352 | intron_variant |
| rs1794055956 | intron_variant |
| rs1794056207 | intron_variant |
| rs1794056708 | intron_variant |
| rs1794056909 | intron_variant |
| rs1794057003 | intron_variant |
| rs1794057646 | intron_variant |
| rs1794057753 | intron_variant |
| rs1794058029 | intron_variant |
| rs1794058224 | intron_variant |
| rs1794058342 | intron_variant |
| rs1794058435 | intron_variant |
| rs1794058527 | intron_variant |
| rs1794058833 | intron_variant |
| rs1794058957 | intron_variant |
| rs1794059368 | intron_variant |
| rs1794059466 | intron_variant |
| rs1794059578 | intron_variant |
| rs1794059675 | intron_variant |
| rs1794060165 | intron_variant |
| rs1794060779 | intron_variant |
| rs1794061059 | intron_variant |
| rs1794061196 | intron_variant |
| rs1794063443 | intron_variant |
| rs1794064111 | intron_variant |
| rs1794064777 | intron_variant |
| rs1794065056 | intron_variant |

|              |                |
|--------------|----------------|
| rs1794065336 | intron_variant |
| rs1794065909 | intron_variant |
| rs1794065998 | intron_variant |
| rs1794066871 | intron_variant |
| rs1794067208 | intron_variant |
| rs1794068153 | intron_variant |
| rs1794068359 | intron_variant |
| rs1794068462 | intron_variant |
| rs1794069046 | intron_variant |
| rs1794069144 | intron_variant |
| rs1794069234 | intron_variant |
| rs1794069324 | intron_variant |
| rs1794069579 | intron_variant |
| rs1794070337 | intron_variant |
| rs1794070546 | intron_variant |
| rs1794070904 | intron_variant |
| rs1794070994 | intron_variant |
| rs1794071136 | intron_variant |
| rs1794071215 | intron_variant |
| rs1794071292 | intron_variant |
| rs1794071448 | intron_variant |
| rs1794072524 | intron_variant |
| rs1794072857 | intron_variant |
| rs1794072936 | intron_variant |
| rs1794073059 | intron_variant |
| rs1794073259 | intron_variant |
| rs1794073361 | intron_variant |
| rs1794073555 | intron_variant |
| rs1794073728 | intron_variant |
| rs1794073830 | intron_variant |
| rs1794073966 | intron_variant |
| rs1794074057 | intron_variant |
| rs1794074300 | intron_variant |
| rs1794074463 | intron_variant |
| rs1794074624 | intron_variant |
| rs1794074790 | intron_variant |
| rs1794075203 | intron_variant |
| rs1794075676 | intron_variant |
| rs1794075878 | intron_variant |
| rs1794076021 | intron_variant |
| rs1794076404 | intron_variant |
| rs1794076565 | intron_variant |
| rs1794076921 | intron_variant |
| rs1794077476 | intron_variant |
| rs1794077574 | intron_variant |
| rs1794077913 | intron_variant |
| rs1794078249 | intron_variant |
| rs1794078350 | intron_variant |
| rs1794078559 | intron_variant |
| rs1794078657 | intron_variant |
| rs1794078743 | intron_variant |
| rs1794079067 | intron_variant |
| rs1794079401 | intron_variant |
| rs1794079720 | intron_variant |
| rs1794079835 | intron_variant |
| rs1794080273 | intron_variant |
| rs1794080358 | intron_variant |
| rs1794080957 | intron_variant |
| rs1794081253 | intron_variant |
| rs1794081350 | intron_variant |
| rs1794081556 | intron_variant |
| rs1794081951 | intron_variant |
| rs1794083279 | intron_variant |
| rs1794083535 | intron_variant |
| rs1794083624 | intron_variant |
| rs1794083739 | intron_variant |
| rs1794083844 | intron_variant |
| rs1794083984 | intron_variant |
| rs1794084414 | intron_variant |
| rs1794084631 | intron_variant |
| rs1794085051 | intron_variant |
| rs1794085355 | intron_variant |
| rs1794085451 | intron_variant |
| rs1794085538 | intron_variant |

|              |                |
|--------------|----------------|
| rs1794085817 | intron_variant |
| rs1794086084 | intron_variant |
| rs1794086192 | intron_variant |
| rs1794086273 | intron_variant |
| rs1794087020 | intron_variant |
| rs1794087144 | intron_variant |
| rs1794087253 | intron_variant |
| rs1794087461 | intron_variant |
| rs1794087576 | intron_variant |
| rs1794087682 | intron_variant |
| rs1794087979 | intron_variant |
| rs1794088080 | intron_variant |
| rs1794088369 | intron_variant |
| rs1794089253 | intron_variant |
| rs1794089956 | intron_variant |
| rs1794090344 | intron_variant |
| rs1794090643 | intron_variant |
| rs1794090818 | intron_variant |
| rs1794091570 | intron_variant |
| rs1794091928 | intron_variant |
| rs1794092060 | intron_variant |
| rs1794093214 | intron_variant |
| rs1794093371 | intron_variant |
| rs1794093909 | intron_variant |
| rs1794095150 | intron_variant |
| rs1794096335 | intron_variant |
| rs1794097089 | intron_variant |
| rs1794097262 | intron_variant |
| rs1794097406 | intron_variant |
| rs1794097916 | intron_variant |
| rs1794098078 | intron_variant |
| rs1794098240 | intron_variant |
| rs1794098364 | intron_variant |
| rs1794098689 | intron_variant |
| rs1794098835 | intron_variant |
| rs1794099333 | intron_variant |
| rs1794100515 | intron_variant |
| rs1794100675 | intron_variant |
| rs1794101697 | intron_variant |
| rs1794102003 | intron_variant |
| rs1794102777 | intron_variant |
| rs1794103053 | intron_variant |
| rs1794103789 | intron_variant |
| rs1794103961 | intron_variant |
| rs1794104081 | intron_variant |
| rs1794104197 | intron_variant |
| rs1794104298 | intron_variant |
| rs1794104405 | intron_variant |
| rs1794104507 | intron_variant |
| rs1794104598 | intron_variant |
| rs1794104712 | intron_variant |
| rs1794104801 | intron_variant |
| rs1794104894 | intron_variant |
| rs1794105005 | intron_variant |
| rs1794105121 | intron_variant |
| rs1794105862 | intron_variant |
| rs1794106066 | intron_variant |
| rs1794106160 | intron_variant |
| rs1794106261 | intron_variant |
| rs1794106582 | intron_variant |
| rs1794106793 | intron_variant |
| rs1794106907 | intron_variant |
| rs1794107584 | intron_variant |
| rs1794107772 | intron_variant |
| rs1794108075 | intron_variant |
| rs1794108182 | intron_variant |
| rs1794108376 | intron_variant |
| rs1794108490 | intron_variant |
| rs1794108803 | intron_variant |
| rs1794109000 | intron_variant |
| rs1794109103 | intron_variant |
| rs1794109297 | intron_variant |
| rs1794109702 | intron_variant |
| rs1794109872 | intron_variant |

|              |                |
|--------------|----------------|
| rs1794110378 | intron_variant |
| rs1794110564 | intron_variant |
| rs1794110767 | intron_variant |
| rs1794111006 | intron_variant |
| rs1794111335 | intron_variant |
| rs1794111437 | intron_variant |
| rs1794111565 | intron_variant |
| rs1794112245 | intron_variant |
| rs1794112482 | intron_variant |
| rs1794112574 | intron_variant |
| rs1794112897 | intron_variant |
| rs1794113170 | intron_variant |
| rs1794113374 | intron_variant |
| rs1794113474 | intron_variant |
| rs1794113568 | intron_variant |
| rs1794113919 | intron_variant |
| rs1794114130 | intron_variant |
| rs1794114328 | intron_variant |
| rs1794114577 | intron_variant |
| rs1794114845 | intron_variant |
| rs1794115485 | intron_variant |
| rs1794115622 | intron_variant |
| rs1794115795 | intron_variant |
| rs1794115947 | intron_variant |
| rs1794116072 | intron_variant |
| rs1794116331 | intron_variant |
| rs1794116443 | intron_variant |
| rs1794116537 | intron_variant |
| rs1794116626 | intron_variant |
| rs1794116725 | intron_variant |
| rs1794116956 | intron_variant |
| rs1794117057 | intron_variant |
| rs1794117176 | intron_variant |
| rs1794117282 | intron_variant |
| rs1794117405 | intron_variant |
| rs1794117507 | intron_variant |
| rs1794117622 | intron_variant |
| rs1794117727 | intron_variant |
| rs1794117806 | intron_variant |
| rs1794117919 | intron_variant |
| rs1794118280 | intron_variant |
| rs1794118421 | intron_variant |
| rs1794118518 | intron_variant |
| rs1794118736 | intron_variant |
| rs1794119218 | intron_variant |
| rs1794119556 | intron_variant |
| rs1794119691 | intron_variant |
| rs1794119822 | intron_variant |
| rs1794119967 | intron_variant |
| rs1794120093 | intron_variant |
| rs1794120299 | intron_variant |
| rs1794120415 | intron_variant |
| rs1794120521 | intron_variant |
| rs1794120774 | intron_variant |
| rs1794121383 | intron_variant |
| rs1794121477 | intron_variant |
| rs1794121735 | intron_variant |
| rs1794122187 | intron_variant |
| rs1794122437 | intron_variant |
| rs1794122768 | intron_variant |
| rs1794122884 | intron_variant |
| rs1794125070 | intron_variant |
| rs1794125168 | intron_variant |
| rs1794125408 | intron_variant |
| rs1794126110 | intron_variant |
| rs1794126645 | intron_variant |
| rs1794126725 | intron_variant |
| rs1794126811 | intron_variant |
| rs1794126914 | intron_variant |
| rs1794127092 | intron_variant |
| rs1794128124 | intron_variant |
| rs1794128242 | intron_variant |
| rs1794128328 | intron_variant |
| rs1794128429 | intron_variant |

|              |                                                                          |
|--------------|--------------------------------------------------------------------------|
| rs1794128548 | intron_variant                                                           |
| rs1794128645 | intron_variant                                                           |
| rs1794129336 | intron_variant                                                           |
| rs1794129590 | intron_variant                                                           |
| rs1794129693 | intron_variant                                                           |
| rs1794130726 | intron_variant                                                           |
| rs1794130844 | intron_variant                                                           |
| rs1794130990 | intron_variant                                                           |
| rs1794131070 | intron_variant                                                           |
| rs1794131303 | intron_variant                                                           |
| rs1794131517 | intron_variant                                                           |
| rs1794131623 | intron_variant                                                           |
| rs1794131740 | intron_variant                                                           |
| rs1794132463 | intron_variant                                                           |
| rs1794132959 | intron_variant                                                           |
| rs1794134702 | intron_variant                                                           |
| rs1794134805 | intron_variant                                                           |
| rs1794135372 | intron_variant                                                           |
| rs1794135825 | intron_variant                                                           |
| rs1794136761 | intron_variant                                                           |
| rs1794140926 | coding_sequence_variant,non_coding_transcript_variant,missense_variant   |
| rs1794141772 | coding_sequence_variant,non_coding_transcript_variant,missense_variant   |
| rs1794142537 | coding_sequence_variant,non_coding_transcript_variant,missense_variant   |
| rs1794142644 | coding_sequence_variant,non_coding_transcript_variant,synonymous_variant |
| rs1794142770 | coding_sequence_variant,non_coding_transcript_variant,missense_variant   |
| rs1794143799 | coding_sequence_variant,non_coding_transcript_variant,missense_variant   |
| rs1794146524 | intron_variant                                                           |
| rs1794148115 | intron_variant                                                           |
| rs1794148303 | intron_variant                                                           |
| rs1794148391 | intron_variant                                                           |
| rs1794148490 | intron_variant                                                           |
| rs1794148761 | intron_variant                                                           |
| rs1794149087 | intron_variant                                                           |
| rs1794149273 | intron_variant                                                           |
| rs1794149543 | intron_variant                                                           |
| rs1794150426 | intron_variant                                                           |
| rs1794150529 | intron_variant                                                           |
| rs1794150624 | intron_variant                                                           |
| rs1794151625 | intron_variant                                                           |
| rs1794151740 | intron_variant                                                           |
| rs1794151833 | intron_variant                                                           |
| rs1794152027 | intron_variant                                                           |
| rs1794152844 | intron_variant                                                           |
| rs1794153299 | intron_variant                                                           |
| rs1794153775 | intron_variant                                                           |
| rs1794153917 | intron_variant                                                           |
| rs1794154202 | intron_variant                                                           |
| rs1794154476 | intron_variant                                                           |
| rs1794154792 | intron_variant                                                           |
| rs1794155537 | intron_variant                                                           |
| rs1794155678 | intron_variant                                                           |
| rs1794155843 | intron_variant                                                           |
| rs1794156010 | intron_variant                                                           |
| rs1794156349 | intron_variant                                                           |
| rs1794156876 | intron_variant                                                           |
| rs1794157028 | intron_variant                                                           |
| rs1794158200 | intron_variant                                                           |
| rs1794158406 | intron_variant                                                           |
| rs1794158496 | intron_variant                                                           |
| rs1794158600 | intron_variant                                                           |
| rs1794158702 | intron_variant                                                           |
| rs1794158854 | intron_variant                                                           |
| rs1794158997 | intron_variant                                                           |
| rs1794160669 | intron_variant                                                           |
| rs1794160907 | intron_variant                                                           |
| rs1794161084 | intron_variant                                                           |
| rs1794161465 | intron_variant                                                           |
| rs1794161630 | intron_variant                                                           |
| rs1794161974 | intron_variant                                                           |
| rs1794162134 | intron_variant                                                           |
| rs1794162271 | intron_variant                                                           |
| rs1794162592 | intron_variant                                                           |
| rs1794162895 | intron_variant                                                           |
| rs1794163646 | intron_variant                                                           |

|              |                |
|--------------|----------------|
| rs1794163794 | intron_variant |
| rs1794163940 | intron_variant |
| rs1794166050 | intron_variant |
| rs1794166464 | intron_variant |
| rs1794166552 | intron_variant |
| rs1794166656 | intron_variant |
| rs1794166885 | intron_variant |
| rs1794167070 | intron_variant |
| rs1794167362 | intron_variant |
| rs1794167543 | intron_variant |
| rs1794167725 | intron_variant |
| rs1794167940 | intron_variant |
| rs1794168032 | intron_variant |
| rs1794168239 | intron_variant |
| rs1794168535 | intron_variant |
| rs1794168864 | intron_variant |
| rs1794169109 | intron_variant |
| rs1794169214 | intron_variant |
| rs1794169412 | intron_variant |
| rs1794169744 | intron_variant |
| rs1794169913 | intron_variant |
| rs1794170279 | intron_variant |
| rs1794170369 | intron_variant |
| rs1794170468 | intron_variant |
| rs1794170660 | intron_variant |
| rs1794171230 | intron_variant |
| rs1794171331 | intron_variant |
| rs1794172068 | intron_variant |
| rs1794172366 | intron_variant |
| rs1794172455 | intron_variant |
| rs1794172706 | intron_variant |
| rs1794174124 | intron_variant |
| rs1794175795 | intron_variant |
| rs1794175883 | intron_variant |
| rs1794176598 | intron_variant |
| rs1794176707 | intron_variant |
| rs1794176897 | intron_variant |
| rs1794177189 | intron_variant |
| rs1794177286 | intron_variant |
| rs1794177591 | intron_variant |
| rs1794178049 | intron_variant |
| rs1794178155 | intron_variant |
| rs1794178554 | intron_variant |
| rs1794178830 | intron_variant |
| rs1794178917 | intron_variant |
| rs1794179140 | intron_variant |
| rs1794179457 | intron_variant |
| rs1794179549 | intron_variant |
| rs1794180359 | intron_variant |
| rs1794180875 | intron_variant |
| rs1794181824 | intron_variant |
| rs1794181964 | intron_variant |
| rs1794182097 | intron_variant |
| rs1794182627 | intron_variant |
| rs1794182778 | intron_variant |
| rs1794183837 | intron_variant |
| rs1794184028 | intron_variant |
| rs1794184220 | intron_variant |
| rs1794184392 | intron_variant |
| rs1794185106 | intron_variant |
| rs1794185195 | intron_variant |
| rs1794185376 | intron_variant |
| rs1794185709 | intron_variant |
| rs1794185847 | intron_variant |
| rs1794185978 | intron_variant |
| rs1794186307 | intron_variant |
| rs1794186459 | intron_variant |
| rs1794187627 | intron_variant |
| rs1794187788 | intron_variant |
| rs1794187951 | intron_variant |
| rs1794188505 | intron_variant |
| rs1794188652 | intron_variant |
| rs1794189599 | intron_variant |
| rs1794189933 | intron_variant |

|              |                |
|--------------|----------------|
| rs1794190619 | intron_variant |
| rs1794190783 | intron_variant |
| rs1794191302 | intron_variant |
| rs1794191439 | intron_variant |
| rs1794191619 | intron_variant |
| rs1794191776 | intron_variant |
| rs1794192733 | intron_variant |
| rs1794194051 | intron_variant |
| rs1794194140 | intron_variant |
| rs1794194237 | intron_variant |
| rs1794194334 | intron_variant |
| rs1794194969 | intron_variant |
| rs1794195177 | intron_variant |
| rs1794195661 | intron_variant |
| rs1794196058 | intron_variant |
| rs1794196234 | intron_variant |
| rs1794196321 | intron_variant |
| rs1794196411 | intron_variant |
| rs1794196675 | intron_variant |
| rs1794197114 | intron_variant |
| rs1794198414 | intron_variant |
| rs1794199422 | intron_variant |
| rs1794199522 | intron_variant |
| rs1794199847 | intron_variant |
| rs1794200052 | intron_variant |
| rs1794200330 | intron_variant |
| rs1794201102 | intron_variant |
| rs1794201291 | intron_variant |
| rs1794201398 | intron_variant |
| rs1794202063 | intron_variant |
| rs1794202311 | intron_variant |
| rs1794202503 | intron_variant |
| rs1794202588 | intron_variant |
| rs1794202768 | intron_variant |
| rs1794202869 | intron_variant |
| rs1794202955 | intron_variant |
| rs1794203845 | intron_variant |
| rs1794203935 | intron_variant |
| rs1794204119 | intron_variant |
| rs1794204229 | intron_variant |
| rs1794204526 | intron_variant |
| rs1794204736 | intron_variant |
| rs1794204839 | intron_variant |
| rs1794205998 | intron_variant |
| rs1794206444 | intron_variant |
| rs1794206564 | intron_variant |
| rs1794206840 | intron_variant |
| rs1794207511 | intron_variant |
| rs1794208499 | intron_variant |
| rs1794208705 | intron_variant |
| rs1794209019 | intron_variant |
| rs1794209830 | intron_variant |
| rs1794209943 | intron_variant |
| rs1794210063 | intron_variant |
| rs1794210168 | intron_variant |
| rs1794210273 | intron_variant |
| rs1794210374 | intron_variant |
| rs1794210527 | intron_variant |
| rs1794210999 | intron_variant |
| rs1794211291 | intron_variant |
| rs1794211945 | intron_variant |
| rs1794212293 | intron_variant |
| rs1794212419 | intron_variant |
| rs1794212947 | intron_variant |
| rs1794213032 | intron_variant |
| rs1794213387 | intron_variant |
| rs1794214049 | intron_variant |
| rs1794215154 | intron_variant |
| rs1794215480 | intron_variant |
| rs1794215608 | intron_variant |
| rs1794215954 | intron_variant |
| rs1794216049 | intron_variant |
| rs1794216378 | intron_variant |
| rs1794216558 | intron_variant |

|              |                                                                          |
|--------------|--------------------------------------------------------------------------|
| rs1794217263 | intron_variant                                                           |
| rs1794217655 | intron_variant                                                           |
| rs1794217838 | intron_variant                                                           |
| rs1794218432 | intron_variant                                                           |
| rs1794220984 | coding_sequence_variant,non_coding_transcript_variant,missense_variant   |
| rs1794222447 | coding_sequence_variant,non_coding_transcript_variant,synonymous_variant |
| rs1794223640 | coding_sequence_variant,non_coding_transcript_variant,missense_variant   |
| rs1794225549 | coding_sequence_variant,stop_gained,non_coding_transcript_variant        |
| rs1794227312 | splice_donor_variant                                                     |
| rs1794228357 | intron_variant                                                           |
| rs1794231327 | intron_variant                                                           |
| rs1794232818 | intron_variant                                                           |
| rs1794234130 | intron_variant                                                           |
| rs1794234483 | intron_variant                                                           |
| rs1794241396 | coding_sequence_variant,non_coding_transcript_variant,synonymous_variant |
| rs1794241813 | coding_sequence_variant,non_coding_transcript_variant,missense_variant   |
| rs1794243276 | coding_sequence_variant,non_coding_transcript_variant,synonymous_variant |
| rs1794248741 | intron_variant                                                           |
| rs1794248908 | intron_variant                                                           |
| rs1794250761 | intron_variant                                                           |
| rs1794250977 | intron_variant                                                           |
| rs1794251260 | intron_variant                                                           |
| rs1794251450 | intron_variant                                                           |
| rs1794252027 | intron_variant                                                           |
| rs1794252118 | intron_variant                                                           |
| rs1794252216 | intron_variant                                                           |
| rs1794252534 | intron_variant                                                           |
| rs1794252907 | intron_variant                                                           |
| rs1794253087 | intron_variant                                                           |
| rs1794253484 | intron_variant                                                           |
| rs1794253570 | intron_variant                                                           |
| rs1794253669 | intron_variant                                                           |
| rs1794254060 | intron_variant                                                           |
| rs1794254808 | intron_variant                                                           |
| rs1794255174 | intron_variant                                                           |
| rs1794255401 | intron_variant                                                           |
| rs1794255498 | intron_variant                                                           |
| rs1794255604 | intron_variant                                                           |
| rs1794255690 | intron_variant                                                           |
| rs1794256148 | intron_variant                                                           |
| rs1794256246 | intron_variant                                                           |
| rs1794256344 | intron_variant                                                           |
| rs1794256554 | intron_variant                                                           |
| rs1794256963 | intron_variant                                                           |
| rs1794257793 | intron_variant                                                           |
| rs1794257901 | intron_variant                                                           |
| rs1794258134 | intron_variant                                                           |
| rs1794258241 | intron_variant                                                           |
| rs1794258352 | intron_variant                                                           |
| rs1794258682 | intron_variant                                                           |
| rs1794259567 | intron_variant                                                           |
| rs1794260611 | intron_variant                                                           |
| rs1794261318 | intron_variant                                                           |
| rs1794261478 | intron_variant                                                           |
| rs1794261838 | intron_variant                                                           |
| rs1794262496 | intron_variant                                                           |
| rs1794263341 | intron_variant                                                           |
| rs1794263448 | intron_variant                                                           |
| rs1794264121 | intron_variant                                                           |
| rs1794264942 | intron_variant                                                           |
| rs1794265193 | intron_variant                                                           |
| rs1794265293 | intron_variant                                                           |
| rs1794265401 | intron_variant                                                           |
| rs1794265646 | intron_variant                                                           |
| rs1794265737 | intron_variant                                                           |
| rs1794266107 | intron_variant                                                           |
| rs1794266331 | intron_variant                                                           |
| rs1794266706 | intron_variant                                                           |
| rs1794266806 | intron_variant                                                           |
| rs1794266924 | intron_variant                                                           |
| rs1794267132 | intron_variant                                                           |
| rs1794267250 | intron_variant                                                           |
| rs1794267997 | intron_variant                                                           |
| rs1794268098 | intron_variant                                                           |

|              |                                                                          |
|--------------|--------------------------------------------------------------------------|
| rs1794268306 | intron_variant                                                           |
| rs1794268392 | intron_variant                                                           |
| rs1794269055 | intron_variant                                                           |
| rs1794269267 | intron_variant                                                           |
| rs1794269374 | intron_variant                                                           |
| rs1794269617 | intron_variant                                                           |
| rs1794270876 | intron_variant                                                           |
| rs1794270969 | intron_variant                                                           |
| rs1794275099 | coding_sequence_variant,non_coding_transcript_variant,missense_variant   |
| rs1794275336 | coding_sequence_variant,non_coding_transcript_variant,missense_variant   |
| rs1794276678 | coding_sequence_variant,non_coding_transcript_variant,missense_variant   |
| rs1794277835 | coding_sequence_variant,non_coding_transcript_variant,synonymous_variant |
| rs1794279085 | coding_sequence_variant,non_coding_transcript_variant,synonymous_variant |
| rs1794279787 | coding_sequence_variant,non_coding_transcript_variant,synonymous_variant |
| rs1794280473 | intron_variant                                                           |
| rs1794280566 | intron_variant                                                           |
| rs1794280747 | intron_variant                                                           |
| rs1794280939 | intron_variant                                                           |
| rs1794281262 | intron_variant                                                           |
| rs1794282209 | intron_variant                                                           |
| rs1794282631 | intron_variant                                                           |
| rs1794283102 | intron_variant                                                           |
| rs1794283309 | intron_variant                                                           |
| rs1794283547 | intron_variant                                                           |
| rs1794283629 | intron_variant                                                           |
| rs1794283718 | intron_variant                                                           |
| rs1794284220 | intron_variant                                                           |
| rs1794284441 | intron_variant                                                           |
| rs1794284679 | intron_variant                                                           |
| rs1794285007 | intron_variant                                                           |
| rs1794285633 | intron_variant                                                           |
| rs1794285839 | intron_variant                                                           |
| rs1794286026 | intron_variant                                                           |
| rs1794286139 | intron_variant                                                           |
| rs1794286585 | intron_variant                                                           |
| rs1794287028 | intron_variant                                                           |
| rs1794287117 | intron_variant                                                           |
| rs1794287334 | intron_variant                                                           |
| rs1794287656 | intron_variant                                                           |
| rs1794287754 | intron_variant                                                           |
| rs1794287943 | intron_variant                                                           |
| rs1794288135 | intron_variant                                                           |
| rs1794288242 | intron_variant                                                           |
| rs1794288348 | intron_variant                                                           |
| rs1794288450 | intron_variant                                                           |
| rs1794288583 | intron_variant                                                           |
| rs1794288773 | intron_variant                                                           |
| rs1794289050 | intron_variant                                                           |
| rs1794289409 | intron_variant                                                           |
| rs1794289677 | intron_variant                                                           |
| rs1794289918 | intron_variant                                                           |
| rs1794290488 | intron_variant                                                           |
| rs1794291315 | intron_variant                                                           |
| rs1794292084 | intron_variant                                                           |
| rs1794292211 | intron_variant                                                           |
| rs1794292511 | intron_variant                                                           |
| rs1794294577 | intron_variant                                                           |
| rs1794294929 | intron_variant                                                           |
| rs1794295329 | intron_variant                                                           |
| rs1794295626 | intron_variant                                                           |
| rs1794295726 | intron_variant                                                           |
| rs1794295926 | intron_variant                                                           |
| rs1794296379 | intron_variant                                                           |
| rs1794296619 | intron_variant                                                           |
| rs1794296785 | intron_variant                                                           |
| rs1794297069 | intron_variant                                                           |
| rs1794297209 | intron_variant                                                           |
| rs1794297367 | intron_variant                                                           |
| rs1794298829 | intron_variant                                                           |
| rs1794300421 | intron_variant                                                           |
| rs1794300837 | intron_variant                                                           |
| rs1794301325 | intron_variant                                                           |
| rs1794301692 | intron_variant                                                           |
| rs1794302168 | intron_variant                                                           |

|              |                                                           |
|--------------|-----------------------------------------------------------|
| rs1794302546 | intron_variant                                            |
| rs1794302646 | intron_variant                                            |
| rs1794303398 | intron_variant                                            |
| rs1794304017 | intron_variant                                            |
| rs1794304127 | intron_variant                                            |
| rs1794304425 | intron_variant                                            |
| rs1794304627 | intron_variant                                            |
| rs1794305217 | intron_variant                                            |
| rs1794305411 | intron_variant                                            |
| rs1794306292 | intron_variant                                            |
| rs1794306386 | intron_variant                                            |
| rs1794306643 | intron_variant                                            |
| rs1794307491 | coding_sequence_variant,intron_variant,synonymous_variant |
| rs1794307675 | coding_sequence_variant,intron_variant,synonymous_variant |
| rs1794308172 | coding_sequence_variant,intron_variant,missense_variant   |
| rs1794308770 | coding_sequence_variant,intron_variant,synonymous_variant |
| rs1794308869 | coding_sequence_variant,intron_variant,missense_variant   |
| rs1794309667 | coding_sequence_variant,intron_variant,synonymous_variant |
| rs1794310643 | coding_sequence_variant,intron_variant,synonymous_variant |
| rs1794310980 | coding_sequence_variant,intron_variant,synonymous_variant |
| rs1794311792 | coding_sequence_variant,intron_variant,synonymous_variant |
| rs1794311908 | coding_sequence_variant,intron_variant,frameshift_variant |
| rs1794314081 | intron_variant                                            |
| rs1794314760 | intron_variant                                            |
| rs1794314992 | intron_variant                                            |
| rs1794316644 | intron_variant                                            |
| rs1794317060 | intron_variant                                            |
| rs1794317152 | intron_variant                                            |
| rs1794317242 | intron_variant                                            |
| rs1794318084 | intron_variant                                            |
| rs1794318272 | intron_variant                                            |
| rs1794318390 | intron_variant                                            |
| rs1794318508 | intron_variant                                            |
| rs1794319134 | intron_variant                                            |
| rs1794319223 | intron_variant                                            |
| rs1794319627 | intron_variant                                            |
| rs1794319796 | intron_variant                                            |
| rs1794320104 | intron_variant                                            |
| rs1794320597 | intron_variant                                            |
| rs1794320954 | intron_variant                                            |
| rs1794321142 | intron_variant                                            |
| rs1794321619 | intron_variant                                            |
| rs1794321706 | intron_variant                                            |
| rs1794321903 | intron_variant                                            |
| rs1794324023 | intron_variant                                            |
| rs1794324115 | intron_variant                                            |
| rs1794324498 | intron_variant                                            |
| rs1794324717 | intron_variant                                            |
| rs1794324801 | intron_variant                                            |
| rs1794325064 | intron_variant                                            |
| rs1794325173 | intron_variant                                            |
| rs1794325615 | intron_variant                                            |
| rs1794326143 | intron_variant                                            |
| rs1794327004 | intron_variant                                            |
| rs1794327197 | intron_variant                                            |
| rs1794327494 | intron_variant                                            |
| rs1794327792 | intron_variant                                            |
| rs1794327890 | intron_variant                                            |
| rs1794328384 | intron_variant                                            |
| rs1794328476 | intron_variant                                            |
| rs1794328657 | intron_variant                                            |
| rs1794328840 | intron_variant                                            |
| rs1794328938 | intron_variant                                            |
| rs1794329333 | intron_variant                                            |
| rs1794329468 | intron_variant                                            |
| rs1794329696 | intron_variant                                            |
| rs1794330203 | intron_variant                                            |
| rs1794330898 | intron_variant                                            |
| rs1794331874 | intron_variant                                            |
| rs1794332011 | intron_variant                                            |
| rs1794332161 | intron_variant                                            |
| rs1794332285 | intron_variant                                            |
| rs1794332402 | intron_variant                                            |
| rs1794332686 | intron_variant                                            |

|              |                |
|--------------|----------------|
| rs1794333224 | intron_variant |
| rs1794335672 | intron_variant |
| rs1794335991 | intron_variant |
| rs1794338828 | intron_variant |
| rs1794338992 | intron_variant |
| rs1794339180 | intron_variant |
| rs1794339280 | intron_variant |
| rs1794339377 | intron_variant |
| rs1794339458 | intron_variant |
| rs1794339563 | intron_variant |
| rs1794339652 | intron_variant |
| rs1794339815 | intron_variant |
| rs1794340239 | intron_variant |
| rs1794340340 | intron_variant |
| rs1794341084 | intron_variant |
| rs1794341223 | intron_variant |
| rs1794341928 | intron_variant |
| rs1794342068 | intron_variant |
| rs1794342207 | intron_variant |
| rs1794342768 | intron_variant |
| rs1794343810 | intron_variant |
| rs1794344107 | intron_variant |
| rs1794344268 | intron_variant |
| rs1794344398 | intron_variant |
| rs1794344827 | intron_variant |
| rs1794345471 | intron_variant |
| rs1794345752 | intron_variant |
| rs1794346520 | intron_variant |
| rs1794346795 | intron_variant |
| rs1794347079 | intron_variant |
| rs1794347839 | intron_variant |
| rs1794348789 | intron_variant |
| rs1794348887 | intron_variant |
| rs1794349547 | intron_variant |
| rs1794349678 | intron_variant |
| rs1794350379 | intron_variant |
| rs1794350529 | intron_variant |
| rs1794350660 | intron_variant |
| rs1794351513 | intron_variant |
| rs1794351893 | intron_variant |
| rs1794357189 | intron_variant |
| rs1794357515 | intron_variant |
| rs1794357669 | intron_variant |
| rs1794358509 | intron_variant |
| rs1794359274 | intron_variant |
| rs1794359907 | intron_variant |
| rs1794360424 | intron_variant |
| rs1794360735 | intron_variant |
| rs1794361107 | intron_variant |
| rs1794361919 | intron_variant |
| rs1794363429 | intron_variant |
| rs1794363845 | intron_variant |
| rs1794363972 | intron_variant |
| rs1794364100 | intron_variant |
| rs1794364251 | intron_variant |
| rs1794364901 | intron_variant |
| rs1794365283 | intron_variant |
| rs1794365410 | intron_variant |
| rs1794365647 | intron_variant |
| rs1794365763 | intron_variant |
| rs1794365861 | intron_variant |
| rs1794365957 | intron_variant |
| rs1794366070 | intron_variant |
| rs1794366462 | intron_variant |
| rs1794366936 | intron_variant |
| rs1794367057 | intron_variant |
| rs1794367359 | intron_variant |
| rs1794367587 | intron_variant |
| rs1794368164 | intron_variant |
| rs1794368565 | intron_variant |
| rs1794368719 | intron_variant |
| rs1794370491 | intron_variant |
| rs1794370980 | intron_variant |
| rs1794371268 | intron_variant |

|              |                |
|--------------|----------------|
| rs1794371541 | intron_variant |
| rs1794371655 | intron_variant |
| rs1794371973 | intron_variant |
| rs1794372746 | intron_variant |
| rs1794373050 | intron_variant |
| rs1794373385 | intron_variant |
| rs1794373593 | intron_variant |
| rs1794373718 | intron_variant |
| rs1794373990 | intron_variant |
| rs1794374218 | intron_variant |
| rs1794374780 | intron_variant |
| rs1794375495 | intron_variant |
| rs1794375841 | intron_variant |
| rs1794378353 | intron_variant |
| rs1794378680 | intron_variant |
| rs1794379006 | intron_variant |
| rs1794379672 | intron_variant |
| rs1794379776 | intron_variant |
| rs1794379876 | intron_variant |
| rs1794380079 | intron_variant |
| rs1794380360 | intron_variant |
| rs1794380527 | intron_variant |
| rs1794380816 | intron_variant |
| rs1794381019 | intron_variant |
| rs1794381235 | intron_variant |
| rs1794381336 | intron_variant |
| rs1794381667 | intron_variant |
| rs1794381874 | intron_variant |
| rs1794381962 | intron_variant |
| rs1794382134 | intron_variant |
| rs1794382229 | intron_variant |
| rs1794382333 | intron_variant |
| rs1794382634 | intron_variant |
| rs1794382736 | intron_variant |
| rs1794382928 | intron_variant |
| rs1794383013 | intron_variant |
| rs1794383103 | intron_variant |
| rs1794383214 | intron_variant |
| rs1794383436 | intron_variant |
| rs1794383537 | intron_variant |
| rs1794383623 | intron_variant |
| rs1794383845 | intron_variant |
| rs1794384022 | intron_variant |
| rs1794384430 | intron_variant |
| rs1794384508 | intron_variant |
| rs1794384741 | intron_variant |
| rs1794384828 | intron_variant |
| rs1794385121 | intron_variant |
| rs1794385532 | intron_variant |
| rs1794385862 | intron_variant |
| rs1794385959 | intron_variant |
| rs1794386046 | intron_variant |
| rs1794386345 | intron_variant |
| rs1794387054 | intron_variant |
| rs1794387419 | intron_variant |
| rs1794387727 | intron_variant |
| rs1794388414 | intron_variant |
| rs1794388729 | intron_variant |
| rs1794389308 | intron_variant |
| rs1794389573 | intron_variant |
| rs1794389757 | intron_variant |
| rs1794390143 | intron_variant |
| rs1794390657 | intron_variant |
| rs1794390837 | intron_variant |
| rs1794391056 | intron_variant |
| rs1794391252 | intron_variant |
| rs1794391653 | intron_variant |
| rs1794391971 | intron_variant |
| rs1794392212 | intron_variant |
| rs1794392319 | intron_variant |
| rs1794392405 | intron_variant |
| rs1794392649 | intron_variant |
| rs1794392754 | intron_variant |
| rs1794392948 | intron_variant |

|              |                |
|--------------|----------------|
| rs1794393174 | intron_variant |
| rs1794393360 | intron_variant |
| rs1794393635 | intron_variant |
| rs1794393730 | intron_variant |
| rs1794394013 | intron_variant |
| rs1794395272 | intron_variant |
| rs1794395356 | intron_variant |
| rs1794395439 | intron_variant |
| rs1794395532 | intron_variant |
| rs1794395728 | intron_variant |
| rs1794395831 | intron_variant |
| rs1794395930 | intron_variant |
| rs1794396629 | intron_variant |
| rs1794397127 | intron_variant |
| rs1794397424 | intron_variant |
| rs1794397564 | intron_variant |
| rs1794397704 | intron_variant |
| rs1794397846 | intron_variant |
| rs1794397984 | intron_variant |
| rs1794398463 | intron_variant |
| rs1794398617 | intron_variant |
| rs1794398946 | intron_variant |
| rs1794399332 | intron_variant |
| rs1794399549 | intron_variant |
| rs1794400019 | intron_variant |
| rs1794400243 | intron_variant |
| rs1794400693 | intron_variant |
| rs1794401329 | intron_variant |
| rs1794401421 | intron_variant |
| rs1794401524 | intron_variant |
| rs1794401630 | intron_variant |
| rs1794402140 | intron_variant |
| rs1794402674 | intron_variant |
| rs1794402774 | intron_variant |
| rs1794402965 | intron_variant |
| rs1794403464 | intron_variant |
| rs1794403700 | intron_variant |
| rs1794403794 | intron_variant |
| rs1794403996 | intron_variant |
| rs1794404447 | intron_variant |
| rs1794404551 | intron_variant |
| rs1794404656 | intron_variant |
| rs1794404744 | intron_variant |
| rs1794406425 | intron_variant |
| rs1794406647 | intron_variant |
| rs1794407010 | intron_variant |
| rs1794408102 | intron_variant |
| rs1794408200 | intron_variant |
| rs1794408491 | intron_variant |
| rs1794408658 | intron_variant |
| rs1794409010 | intron_variant |
| rs1794409170 | intron_variant |
| rs1794410464 | intron_variant |
| rs1794410957 | intron_variant |
| rs1794411114 | intron_variant |
| rs1794411426 | intron_variant |
| rs1794411695 | intron_variant |
| rs1794411836 | intron_variant |
| rs1794412467 | intron_variant |
| rs1794413000 | intron_variant |
| rs1794414338 | intron_variant |
| rs1794414503 | intron_variant |
| rs1794414762 | intron_variant |
| rs1794415436 | intron_variant |
| rs1794415841 | intron_variant |
| rs1794415989 | intron_variant |
| rs1794416710 | intron_variant |
| rs1794417347 | intron_variant |
| rs1794417487 | intron_variant |
| rs1794417675 | intron_variant |
| rs1794417819 | intron_variant |
| rs1794417936 | intron_variant |
| rs1794418318 | intron_variant |
| rs1794419664 | intron_variant |

|              |                |
|--------------|----------------|
| rs1794420315 | intron_variant |
| rs1794420415 | intron_variant |
| rs1794420555 | intron_variant |
| rs1794421455 | intron_variant |
| rs1794421809 | intron_variant |
| rs1794422088 | intron_variant |
| rs1794422431 | intron_variant |
| rs1794422575 | intron_variant |
| rs1794423442 | intron_variant |
| rs1794423595 | intron_variant |
| rs1794423772 | intron_variant |
| rs1794424107 | intron_variant |
| rs1794424277 | intron_variant |
| rs1794424441 | intron_variant |
| rs1794424600 | intron_variant |
| rs1794424972 | intron_variant |
| rs1794425702 | intron_variant |
| rs1794426158 | intron_variant |
| rs1794428013 | intron_variant |
| rs1794429179 | intron_variant |
| rs1794429311 | intron_variant |
| rs1794429582 | intron_variant |
| rs1794430101 | intron_variant |
| rs1794430314 | intron_variant |
| rs1794430644 | intron_variant |
| rs1794431327 | intron_variant |
| rs1794431424 | intron_variant |
| rs1794431715 | intron_variant |
| rs1794432256 | intron_variant |
| rs1794432748 | intron_variant |
| rs1794432851 | intron_variant |
| rs1794432938 | intron_variant |
| rs1794433402 | intron_variant |
| rs1794433671 | intron_variant |
| rs1794433778 | intron_variant |
| rs1794433887 | intron_variant |
| rs1794434060 | intron_variant |
| rs1794434156 | intron_variant |
| rs1794434459 | intron_variant |
| rs1794434566 | intron_variant |
| rs1794434742 | intron_variant |
| rs1794434918 | intron_variant |
| rs1794435013 | intron_variant |
| rs1794435115 | intron_variant |
| rs1794435220 | intron_variant |
| rs1794435656 | intron_variant |
| rs1794435956 | intron_variant |
| rs1794436594 | intron_variant |
| rs1794436686 | intron_variant |
| rs1794436974 | intron_variant |
| rs1794437078 | intron_variant |
| rs1794437265 | intron_variant |
| rs1794437739 | intron_variant |
| rs1794437902 | intron_variant |
| rs1794438097 | intron_variant |
| rs1794438378 | intron_variant |
| rs1794438496 | intron_variant |
| rs1794438762 | intron_variant |
| rs1794438860 | intron_variant |
| rs1794438951 | intron_variant |
| rs1794439279 | intron_variant |
| rs1794439374 | intron_variant |
| rs1794439465 | intron_variant |
| rs1794439860 | intron_variant |
| rs1794440081 | intron_variant |
| rs1794440281 | intron_variant |
| rs1794440473 | intron_variant |
| rs1794440560 | intron_variant |
| rs1794440754 | intron_variant |
| rs1794440932 | intron_variant |
| rs1794441102 | intron_variant |
| rs1794441185 | intron_variant |
| rs1794442009 | intron_variant |
| rs1794442195 | intron_variant |

|              |                                                                          |
|--------------|--------------------------------------------------------------------------|
| rs1794442823 | intron_variant                                                           |
| rs1794442922 | intron_variant                                                           |
| rs1794443409 | intron_variant                                                           |
| rs1794443592 | intron_variant                                                           |
| rs1794443774 | intron_variant                                                           |
| rs1794444360 | intron_variant                                                           |
| rs1794445608 | intron_variant                                                           |
| rs1794445724 | intron_variant                                                           |
| rs1794445915 | intron_variant                                                           |
| rs1794446111 | intron_variant                                                           |
| rs1794446515 | intron_variant                                                           |
| rs1794447035 | intron_variant                                                           |
| rs1794447336 | intron_variant                                                           |
| rs1794447443 | intron_variant                                                           |
| rs1794447893 | intron_variant                                                           |
| rs1794448160 | intron_variant                                                           |
| rs1794448307 | intron_variant                                                           |
| rs1794450027 | intron_variant                                                           |
| rs1794450336 | intron_variant                                                           |
| rs1794450489 | intron_variant                                                           |
| rs1794450649 | intron_variant                                                           |
| rs1794450984 | intron_variant                                                           |
| rs1794451136 | intron_variant                                                           |
| rs1794451288 | intron_variant                                                           |
| rs1794451834 | intron_variant                                                           |
| rs1794452416 | intron_variant                                                           |
| rs1794452564 | intron_variant                                                           |
| rs1794452709 | intron_variant                                                           |
| rs1794452845 | intron_variant                                                           |
| rs1794453140 | intron_variant                                                           |
| rs1794454418 | intron_variant                                                           |
| rs1794455304 | intron_variant                                                           |
| rs1794457657 | coding_sequence_variant,non_coding_transcript_variant,missense_variant   |
| rs1794458829 | coding_sequence_variant,non_coding_transcript_variant,synonymous_variant |
| rs1794459560 | coding_sequence_variant,non_coding_transcript_variant,missense_variant   |
| rs1794460713 | coding_sequence_variant,non_coding_transcript_variant,missense_variant   |
| rs1794462604 | coding_sequence_variant,non_coding_transcript_variant,synonymous_variant |
| rs1794464524 | coding_sequence_variant,non_coding_transcript_variant,synonymous_variant |
| rs1794466783 | coding_sequence_variant,non_coding_transcript_variant,frameshift_variant |
| rs1794467654 | coding_sequence_variant,non_coding_transcript_variant,missense_variant   |
| rs1794476422 | intron_variant                                                           |
| rs1794476570 | intron_variant                                                           |
| rs1794476856 | intron_variant                                                           |
| rs1794478554 | intron_variant                                                           |
| rs1794480401 | intron_variant                                                           |
| rs1794480879 | intron_variant                                                           |
| rs1794481193 | intron_variant                                                           |
| rs1794481491 | intron_variant                                                           |
| rs1794482461 | intron_variant                                                           |
| rs1794482623 | intron_variant                                                           |
| rs1794482725 | genic_upstream_transcript_variant,intron_variant                         |
| rs1794483362 | intron_variant                                                           |
| rs1794484054 | intron_variant                                                           |
| rs1794484186 | intron_variant                                                           |
| rs1794485368 | intron_variant                                                           |
| rs1794485676 | intron_variant                                                           |
| rs1794485959 | intron_variant                                                           |
| rs1794486214 | intron_variant                                                           |
| rs1794486774 | intron_variant                                                           |
| rs1794487739 | intron_variant                                                           |
| rs1794488320 | intron_variant                                                           |
| rs1794488423 | intron_variant                                                           |
| rs1794489080 | intron_variant                                                           |
| rs1794489219 | intron_variant                                                           |
| rs1794490399 | intron_variant                                                           |
| rs1794490519 | intron_variant                                                           |
| rs1794490641 | intron_variant                                                           |
| rs1794491321 | intron_variant                                                           |
| rs1794491648 | intron_variant                                                           |
| rs1794491978 | intron_variant                                                           |
| rs1794492121 | intron_variant                                                           |
| rs1794494931 | intron_variant                                                           |
| rs1794495082 | intron_variant                                                           |
| rs1794495858 | intron_variant                                                           |

|              |                |
|--------------|----------------|
| rs1794496341 | intron_variant |
| rs1794496781 | intron_variant |
| rs1794496976 | intron_variant |
| rs1794497184 | intron_variant |
| rs1794497505 | intron_variant |
| rs1794497640 | intron_variant |
| rs1794498145 | intron_variant |
| rs1794498433 | intron_variant |
| rs1794498585 | intron_variant |
| rs1794498901 | intron_variant |
| rs1794499561 | intron_variant |
| rs1794500061 | intron_variant |
| rs1794500244 | intron_variant |
| rs1794500395 | intron_variant |
| rs1794500863 | intron_variant |
| rs1794500995 | intron_variant |
| rs1794501845 | intron_variant |
| rs1794502000 | intron_variant |
| rs1794503504 | intron_variant |
| rs1794503813 | intron_variant |
| rs1794503947 | intron_variant |
| rs1794504143 | intron_variant |
| rs1794504428 | intron_variant |
| rs1794504845 | intron_variant |
| rs1794505030 | intron_variant |
| rs1794505326 | intron_variant |
| rs1794505469 | intron_variant |
| rs1794505758 | intron_variant |
| rs1794506066 | intron_variant |
| rs1794506563 | intron_variant |
| rs1794507057 | intron_variant |
| rs1794507191 | intron_variant |
| rs1794507832 | intron_variant |
| rs1794508108 | intron_variant |
| rs1794508423 | intron_variant |
| rs1794508562 | intron_variant |
| rs1794508863 | intron_variant |
| rs1794509634 | intron_variant |
| rs1794509920 | intron_variant |
| rs1794510842 | intron_variant |
| rs1794510967 | intron_variant |
| rs1794511755 | intron_variant |
| rs1794512057 | intron_variant |
| rs1794512175 | intron_variant |
| rs1794512993 | intron_variant |
| rs1794513147 | intron_variant |
| rs1794513438 | intron_variant |
| rs1794514552 | intron_variant |
| rs1794515313 | intron_variant |
| rs1794515594 | intron_variant |
| rs1794516347 | intron_variant |
| rs1794516703 | intron_variant |
| rs1794516845 | intron_variant |
| rs1794516982 | intron_variant |
| rs1794517127 | intron_variant |
| rs1794517267 | intron_variant |
| rs1794517785 | intron_variant |
| rs1794517951 | intron_variant |
| rs1794519859 | intron_variant |
| rs1794520007 | intron_variant |
| rs1794520923 | intron_variant |
| rs1794521821 | intron_variant |
| rs1794523573 | intron_variant |
| rs1794523710 | intron_variant |
| rs1794523847 | intron_variant |
| rs1794524471 | intron_variant |
| rs1794524618 | intron_variant |
| rs1794525356 | intron_variant |
| rs1794525513 | intron_variant |
| rs1794525829 | intron_variant |
| rs1794526634 | intron_variant |
| rs1794526994 | intron_variant |
| rs1794528178 | intron_variant |
| rs1794529591 | intron_variant |

|              |                |
|--------------|----------------|
| rs1794529738 | intron_variant |
| rs1794529861 | intron_variant |
| rs1794530717 | intron_variant |
| rs1794530843 | intron_variant |
| rs1794530997 | intron_variant |
| rs1794531513 | intron_variant |
| rs1794531640 | intron_variant |
| rs1794532279 | intron_variant |
| rs1794533550 | intron_variant |
| rs1794534079 | intron_variant |
| rs1794534246 | intron_variant |
| rs1794536915 | intron_variant |
| rs1794537631 | intron_variant |
| rs1794537788 | intron_variant |
| rs1794538099 | intron_variant |
| rs1794538590 | intron_variant |
| rs1794538765 | intron_variant |
| rs1794538919 | intron_variant |
| rs1794540493 | intron_variant |
| rs1794540653 | intron_variant |
| rs1794540820 | intron_variant |
| rs1794540981 | intron_variant |
| rs1794541316 | intron_variant |
| rs1794543545 | intron_variant |
| rs1794543694 | intron_variant |
| rs1794543866 | intron_variant |
| rs1794544413 | intron_variant |
| rs1794547073 | intron_variant |
| rs1794547230 | intron_variant |
| rs1794547698 | intron_variant |
| rs1794548036 | intron_variant |
| rs1794548348 | intron_variant |
| rs1794548700 | intron_variant |
| rs1794549026 | intron_variant |
| rs1794549440 | intron_variant |
| rs1794549762 | intron_variant |
| rs1794550415 | intron_variant |
| rs1794551176 | intron_variant |
| rs1794551632 | intron_variant |
| rs1794552102 | intron_variant |
| rs1794552255 | intron_variant |
| rs1794552415 | intron_variant |
| rs1794552582 | intron_variant |
| rs1794553417 | intron_variant |
| rs1794553764 | intron_variant |
| rs1794553940 | intron_variant |
| rs1794555176 | intron_variant |
| rs1794555329 | intron_variant |
| rs1794556340 | intron_variant |
| rs1794556511 | intron_variant |
| rs1794557108 | intron_variant |
| rs1794557267 | intron_variant |
| rs1794557823 | intron_variant |
| rs1794557985 | intron_variant |
| rs1794558132 | intron_variant |
| rs1794558554 | intron_variant |
| rs1794559160 | intron_variant |
| rs1794559451 | intron_variant |
| rs1794559743 | intron_variant |
| rs1794560280 | intron_variant |
| rs1794560419 | intron_variant |
| rs1794560808 | intron_variant |
| rs1794561460 | intron_variant |
| rs1794561605 | intron_variant |
| rs1794561788 | intron_variant |
| rs1794561972 | intron_variant |
| rs1794562155 | intron_variant |
| rs1794562366 | intron_variant |
| rs1794562467 | intron_variant |
| rs1794562748 | intron_variant |
| rs1794563213 | intron_variant |
| rs1794563355 | intron_variant |
| rs1794563852 | intron_variant |
| rs1794563993 | intron_variant |

|              |                |
|--------------|----------------|
| rs1794564483 | intron_variant |
| rs1794564566 | intron_variant |
| rs1794564757 | intron_variant |
| rs1794565220 | intron_variant |
| rs1794565773 | intron_variant |
| rs1794566709 | intron_variant |
| rs1794567033 | intron_variant |
| rs1794567212 | intron_variant |
| rs1794567594 | intron_variant |
| rs1794567910 | intron_variant |
| rs1794568190 | intron_variant |
| rs1794568487 | intron_variant |
| rs1794568797 | intron_variant |
| rs1794568891 | intron_variant |
| rs1794568991 | intron_variant |
| rs1794569267 | intron_variant |
| rs1794569555 | intron_variant |
| rs1794569723 | intron_variant |
| rs1794569846 | intron_variant |
| rs1794570141 | intron_variant |
| rs1794570507 | intron_variant |
| rs1794570700 | intron_variant |
| rs1794570801 | intron_variant |
| rs1794570965 | intron_variant |
| rs1794571209 | intron_variant |
| rs1794571292 | intron_variant |
| rs1794571376 | intron_variant |
| rs1794571782 | intron_variant |
| rs1794571944 | intron_variant |
| rs1794572259 | intron_variant |
| rs1794573039 | intron_variant |
| rs1794573750 | intron_variant |
| rs1794573883 | intron_variant |
| rs1794574315 | intron_variant |
| rs1794574408 | intron_variant |
| rs1794574571 | intron_variant |
| rs1794574756 | intron_variant |
| rs1794574974 | intron_variant |
| rs1794575193 | intron_variant |
| rs1794575277 | intron_variant |
| rs1794575470 | intron_variant |
| rs1794575563 | intron_variant |
| rs1794575764 | intron_variant |
| rs1794575845 | intron_variant |
| rs1794576355 | intron_variant |
| rs1794576446 | intron_variant |
| rs1794576833 | intron_variant |
| rs1794577117 | intron_variant |
| rs1794580169 | intron_variant |
| rs1794580457 | intron_variant |
| rs1794581052 | intron_variant |
| rs1794581146 | intron_variant |
| rs1794584342 | intron_variant |
| rs1794584549 | intron_variant |
| rs1794585472 | intron_variant |
| rs1794585575 | intron_variant |
| rs1794586629 | intron_variant |
| rs1794586934 | intron_variant |
| rs1794587215 | intron_variant |
| rs1794588195 | intron_variant |
| rs1794588645 | intron_variant |
| rs1794588840 | intron_variant |
| rs1794589034 | intron_variant |
| rs1794589235 | intron_variant |
| rs1794590155 | intron_variant |
| rs1794590562 | intron_variant |
| rs1794590873 | intron_variant |
| rs1794591069 | intron_variant |
| rs1794591447 | intron_variant |
| rs1794591940 | intron_variant |
| rs1794592090 | intron_variant |
| rs1794592373 | intron_variant |
| rs1794592517 | intron_variant |
| rs1794592802 | intron_variant |

|              |                |
|--------------|----------------|
| rs1794593856 | intron_variant |
| rs1794593946 | intron_variant |
| rs1794594439 | intron_variant |
| rs1794594592 | intron_variant |
| rs1794594693 | intron_variant |
| rs1794594942 | intron_variant |
| rs1794595420 | intron_variant |
| rs1794595524 | intron_variant |
| rs1794595810 | intron_variant |
| rs1794595907 | intron_variant |
| rs1794596551 | intron_variant |
| rs1794596876 | intron_variant |
| rs1794598137 | intron_variant |
| rs1794598579 | intron_variant |
| rs1794598891 | intron_variant |
| rs1794599159 | intron_variant |
| rs1794599901 | intron_variant |
| rs1794600105 | intron_variant |
| rs1794600205 | intron_variant |
| rs1794600969 | intron_variant |
| rs1794601122 | intron_variant |
| rs1794601548 | intron_variant |
| rs1794601655 | intron_variant |
| rs1794602295 | intron_variant |
| rs1794602411 | intron_variant |
| rs1794602498 | intron_variant |
| rs1794602711 | intron_variant |
| rs1794602816 | intron_variant |
| rs1794602936 | intron_variant |
| rs1794603119 | intron_variant |
| rs1794603227 | intron_variant |
| rs1794603433 | intron_variant |
| rs1794603718 | intron_variant |
| rs1794603816 | intron_variant |
| rs1794604109 | intron_variant |
| rs1794604251 | intron_variant |
| rs1794604412 | intron_variant |
| rs1794604560 | intron_variant |
| rs1794604872 | intron_variant |
| rs1794605025 | intron_variant |
| rs1794605182 | intron_variant |
| rs1794605341 | intron_variant |
| rs1794606029 | intron_variant |
| rs1794606507 | intron_variant |
| rs1794606875 | intron_variant |
| rs1794607443 | intron_variant |
| rs1794607534 | intron_variant |
| rs1794607649 | intron_variant |
| rs1794608095 | intron_variant |
| rs1794608669 | intron_variant |
| rs1794608788 | intron_variant |
| rs1794608923 | intron_variant |
| rs1794609061 | intron_variant |
| rs1794609202 | intron_variant |
| rs1794609757 | intron_variant |
| rs1794609893 | intron_variant |
| rs1794610648 | intron_variant |
| rs1794610767 | intron_variant |
| rs1794612284 | intron_variant |
| rs1794613376 | intron_variant |
| rs1794613510 | intron_variant |
| rs1794614367 | intron_variant |
| rs1794614501 | intron_variant |
| rs1794614735 | intron_variant |
| rs1794615066 | intron_variant |
| rs1794615168 | intron_variant |
| rs1794615508 | intron_variant |
| rs1794615654 | intron_variant |
| rs1794616075 | intron_variant |
| rs1794617261 | intron_variant |
| rs1794617724 | intron_variant |
| rs1794618041 | intron_variant |
| rs1794618168 | intron_variant |
| rs1794618276 | intron_variant |

|              |                |
|--------------|----------------|
| rs1794618479 | intron_variant |
| rs1794618574 | intron_variant |
| rs1794619417 | intron_variant |
| rs1794619538 | intron_variant |
| rs1794620318 | intron_variant |
| rs1794620418 | intron_variant |
| rs1794621151 | intron_variant |
| rs1794621258 | intron_variant |
| rs1794621384 | intron_variant |
| rs1794621498 | intron_variant |
| rs1794621630 | intron_variant |
| rs1794622350 | intron_variant |
| rs1794622625 | intron_variant |
| rs1794622998 | intron_variant |
| rs1794623122 | intron_variant |
| rs1794623250 | intron_variant |
| rs1794623362 | intron_variant |
| rs1794623457 | intron_variant |
| rs1794623650 | intron_variant |
| rs1794623917 | intron_variant |
| rs1794624446 | intron_variant |
| rs1794624536 | intron_variant |
| rs1794625039 | intron_variant |
| rs1794625196 | intron_variant |
| rs1794625329 | intron_variant |
| rs1794625474 | intron_variant |
| rs1794626776 | intron_variant |
| rs1794627168 | intron_variant |
| rs1794628094 | intron_variant |
| rs1794628230 | intron_variant |
| rs1794628376 | intron_variant |
| rs1794629008 | intron_variant |
| rs1794629249 | intron_variant |
| rs1794629745 | intron_variant |
| rs1794630697 | intron_variant |
| rs1794631441 | intron_variant |
| rs1794631568 | intron_variant |
| rs1794632008 | intron_variant |
| rs1794632085 | intron_variant |
| rs1794632445 | intron_variant |
| rs1794632552 | intron_variant |
| rs1794632818 | intron_variant |
| rs1794633117 | intron_variant |
| rs1794633239 | intron_variant |
| rs1794633388 | intron_variant |
| rs1794633531 | intron_variant |
| rs1794634369 | intron_variant |
| rs1794634510 | intron_variant |
| rs1794634973 | intron_variant |
| rs1794635721 | intron_variant |
| rs1794635890 | intron_variant |
| rs1794636055 | intron_variant |
| rs1794636140 | intron_variant |
| rs1794636729 | intron_variant |
| rs1794637418 | intron_variant |
| rs1794637506 | intron_variant |
| rs1794637759 | intron_variant |
| rs1794637874 | intron_variant |
| rs1794638489 | intron_variant |
| rs1794639131 | intron_variant |
| rs1794639668 | intron_variant |
| rs1794639763 | intron_variant |
| rs1794640006 | intron_variant |
| rs1794640402 | intron_variant |
| rs1794640481 | intron_variant |
| rs1794640816 | intron_variant |
| rs1794640913 | intron_variant |
| rs1794641096 | intron_variant |
| rs1794641178 | intron_variant |
| rs1794641534 | intron_variant |
| rs1794642068 | intron_variant |
| rs1794642160 | intron_variant |
| rs1794642258 | intron_variant |
| rs1794642676 | intron_variant |

|              |                |
|--------------|----------------|
| rs1794642879 | intron_variant |
| rs1794643046 | intron_variant |
| rs1794643153 | intron_variant |
| rs1794643214 | intron_variant |
| rs1794643724 | intron_variant |
| rs1794644418 | intron_variant |
| rs1794644854 | intron_variant |
| rs1794645357 | intron_variant |
| rs1794645531 | intron_variant |
| rs1794645923 | intron_variant |
| rs1794646025 | intron_variant |
| rs1794646111 | intron_variant |
| rs1794646278 | intron_variant |
| rs1794646501 | intron_variant |
| rs1794646841 | intron_variant |
| rs1794646922 | intron_variant |
| rs1794647023 | intron_variant |
| rs1794647130 | intron_variant |
| rs1794647408 | intron_variant |
| rs1794648016 | intron_variant |
| rs1794648597 | intron_variant |
| rs1794648681 | intron_variant |
| rs1794648907 | intron_variant |
| rs1794649256 | intron_variant |
| rs1794649406 | intron_variant |
| rs1794649672 | intron_variant |
| rs1794649837 | intron_variant |
| rs1794649956 | intron_variant |
| rs1794650038 | intron_variant |
| rs1794650127 | intron_variant |
| rs1794650326 | intron_variant |
| rs1794650807 | intron_variant |
| rs1794650975 | intron_variant |
| rs1794651489 | intron_variant |
| rs1794651569 | intron_variant |
| rs1794651702 | intron_variant |
| rs1794651837 | intron_variant |
| rs1794651974 | intron_variant |
| rs1794654124 | intron_variant |
| rs1794654273 | intron_variant |
| rs1794654449 | intron_variant |
| rs1794654592 | intron_variant |
| rs1794656689 | intron_variant |
| rs1794658097 | intron_variant |
| rs1794658335 | intron_variant |
| rs1794659090 | intron_variant |
| rs1794659544 | intron_variant |
| rs1794659824 | intron_variant |
| rs1794660835 | intron_variant |
| rs1794660952 | intron_variant |
| rs1794661220 | intron_variant |
| rs1794661757 | intron_variant |
| rs1794662470 | intron_variant |
| rs1794662602 | intron_variant |
| rs1794663242 | intron_variant |
| rs1794663379 | intron_variant |
| rs1794663644 | intron_variant |
| rs1794663762 | intron_variant |
| rs1794663905 | intron_variant |
| rs1794664475 | intron_variant |
| rs1794664929 | intron_variant |
| rs1794665163 | intron_variant |
| rs1794666339 | intron_variant |
| rs1794666478 | intron_variant |
| rs1794666867 | intron_variant |
| rs1794667679 | intron_variant |
| rs1794667986 | intron_variant |
| rs1794668559 | intron_variant |
| rs1794669241 | intron_variant |
| rs1794669751 | intron_variant |
| rs1794670212 | intron_variant |
| rs1794670683 | intron_variant |
| rs1794670810 | intron_variant |
| rs1794670929 | intron_variant |

|              |                |
|--------------|----------------|
| rs1794671177 | intron_variant |
| rs1794671310 | intron_variant |
| rs1794671557 | intron_variant |
| rs1794671767 | intron_variant |
| rs1794671935 | intron_variant |
| rs1794672187 | intron_variant |
| rs1794672317 | intron_variant |
| rs1794672401 | intron_variant |
| rs1794672494 | intron_variant |
| rs1794672597 | intron_variant |
| rs1794673002 | intron_variant |
| rs1794673082 | intron_variant |
| rs1794673243 | intron_variant |
| rs1794673333 | intron_variant |
| rs1794673569 | intron_variant |
| rs1794673760 | intron_variant |
| rs1794673845 | intron_variant |
| rs1794674460 | intron_variant |
| rs1794674529 | intron_variant |
| rs1794674623 | intron_variant |
| rs1794675074 | intron_variant |
| rs1794675485 | intron_variant |
| rs1794675632 | intron_variant |
| rs1794676357 | intron_variant |
| rs1794677164 | intron_variant |
| rs1794677715 | intron_variant |
| rs1794677796 | intron_variant |
| rs1794678152 | intron_variant |
| rs1794678211 | intron_variant |
| rs1794678299 | intron_variant |
| rs1794678448 | intron_variant |
| rs1794678510 | intron_variant |
| rs1794678735 | intron_variant |
| rs1794679030 | intron_variant |
| rs1794679295 | intron_variant |
| rs1794679458 | intron_variant |
| rs1794679822 | intron_variant |
| rs1794680288 | intron_variant |
| rs1794680446 | intron_variant |
| rs1794681334 | intron_variant |
| rs1794681640 | intron_variant |
| rs1794682032 | intron_variant |
| rs1794682268 | intron_variant |
| rs1794682343 | intron_variant |
| rs1794682419 | intron_variant |
| rs1794682536 | intron_variant |
| rs1794682615 | intron_variant |
| rs1794682999 | intron_variant |
| rs1794684150 | intron_variant |
| rs1794684239 | intron_variant |
| rs1794684571 | intron_variant |
| rs1794684646 | intron_variant |
| rs1794684731 | intron_variant |
| rs1794684990 | intron_variant |
| rs1794685369 | intron_variant |
| rs1794685555 | intron_variant |
| rs1794685743 | intron_variant |
| rs1794685999 | intron_variant |
| rs1794686132 | intron_variant |
| rs1794688891 | intron_variant |
| rs1794689075 | intron_variant |
| rs1794689251 | intron_variant |
| rs1794689353 | intron_variant |
| rs1794689837 | intron_variant |
| rs1794690090 | intron_variant |
| rs1794690214 | intron_variant |
| rs1794690837 | intron_variant |
| rs1794691261 | intron_variant |
| rs1794691979 | intron_variant |
| rs1794692568 | intron_variant |
| rs1794693037 | intron_variant |
| rs1794693469 | intron_variant |
| rs1794694403 | intron_variant |
| rs1794694529 | intron_variant |

|              |                |
|--------------|----------------|
| rs1794694668 | intron_variant |
| rs1794694786 | intron_variant |
| rs1794695030 | intron_variant |
| rs1794696367 | intron_variant |
| rs1794696967 | intron_variant |
| rs1794697111 | intron_variant |
| rs1794697243 | intron_variant |
| rs1794697673 | intron_variant |
| rs1794697815 | intron_variant |
| rs1794698256 | intron_variant |
| rs1794698413 | intron_variant |
| rs1794699278 | intron_variant |
| rs1794699431 | intron_variant |
| rs1794699848 | intron_variant |
| rs1794700465 | intron_variant |
| rs1794701208 | intron_variant |
| rs1794701351 | intron_variant |
| rs1794702854 | intron_variant |
| rs1794703168 | intron_variant |
| rs1794703304 | intron_variant |
| rs1794703583 | intron_variant |
| rs1794704526 | intron_variant |
| rs1794704664 | intron_variant |
| rs1794704786 | intron_variant |
| rs1794705073 | intron_variant |
| rs1794705439 | intron_variant |
| rs1794705586 | intron_variant |
| rs1794706206 | intron_variant |
| rs1794706354 | intron_variant |
| rs1794706443 | intron_variant |
| rs1794706642 | intron_variant |
| rs1794707273 | intron_variant |
| rs1794707357 | intron_variant |
| rs1794707663 | intron_variant |
| rs1794707855 | intron_variant |
| rs1794708098 | intron_variant |
| rs1794708828 | intron_variant |
| rs1794709588 | intron_variant |
| rs1794709844 | intron_variant |
| rs1794710087 | intron_variant |
| rs1794710184 | intron_variant |
| rs1794710278 | intron_variant |
| rs1794710478 | intron_variant |
| rs1794710875 | intron_variant |
| rs1794711012 | intron_variant |
| rs1794711305 | intron_variant |
| rs1794711469 | intron_variant |
| rs1794711545 | intron_variant |
| rs1794711614 | intron_variant |
| rs1794711711 | intron_variant |
| rs1794711876 | intron_variant |
| rs1794712133 | intron_variant |
| rs1794712295 | intron_variant |
| rs1794713424 | intron_variant |
| rs1794713956 | intron_variant |
| rs1794714434 | intron_variant |
| rs1794714686 | intron_variant |
| rs1794715057 | intron_variant |
| rs1794715227 | intron_variant |
| rs1794715396 | intron_variant |
| rs1794715636 | intron_variant |
| rs1794715725 | intron_variant |
| rs1794715832 | intron_variant |
| rs1794716500 | intron_variant |
| rs1794716637 | intron_variant |
| rs1794717054 | intron_variant |
| rs1794717906 | intron_variant |
| rs1794718807 | intron_variant |
| rs1794719998 | intron_variant |
| rs1794720121 | intron_variant |
| rs1794720268 | intron_variant |
| rs1794720574 | intron_variant |
| rs1794721412 | intron_variant |
| rs1794721547 | intron_variant |

|              |                |
|--------------|----------------|
| rs1794721835 | intron_variant |
| rs1794722005 | intron_variant |
| rs1794722934 | intron_variant |
| rs1794723431 | intron_variant |
| rs1794723986 | intron_variant |
| rs1794724591 | intron_variant |
| rs1794724707 | intron_variant |
| rs1794725272 | intron_variant |
| rs1794725557 | intron_variant |
| rs1794726836 | intron_variant |
| rs1794727187 | intron_variant |
| rs1794728628 | intron_variant |
| rs1794728763 | intron_variant |
| rs1794728902 | intron_variant |
| rs1794729055 | intron_variant |
| rs1794729189 | intron_variant |
| rs1794730631 | intron_variant |
| rs1794730782 | intron_variant |
| rs1794730888 | intron_variant |
| rs1794731398 | intron_variant |
| rs1794732032 | intron_variant |
| rs1794732321 | intron_variant |
| rs1794732438 | intron_variant |
| rs1794733548 | intron_variant |
| rs1794734727 | intron_variant |
| rs1794736239 | intron_variant |
| rs1794736550 | intron_variant |
| rs1794736839 | intron_variant |
| rs1794738603 | intron_variant |
| rs1794739082 | intron_variant |
| rs1794739225 | intron_variant |
| rs1794739368 | intron_variant |
| rs1794739647 | intron_variant |
| rs1794739799 | intron_variant |
| rs1794739936 | intron_variant |
| rs1794740064 | intron_variant |
| rs1794740333 | intron_variant |
| rs1794741583 | intron_variant |
| rs1794741882 | intron_variant |
| rs1794742197 | intron_variant |
| rs1794742372 | intron_variant |
| rs1794742601 | intron_variant |
| rs1794742681 | intron_variant |
| rs1794742870 | intron_variant |
| rs1794742949 | intron_variant |
| rs1794743031 | intron_variant |
| rs1794743267 | intron_variant |
| rs1794743351 | intron_variant |
| rs1794743434 | intron_variant |
| rs1794743596 | intron_variant |
| rs1794743869 | intron_variant |
| rs1794744050 | intron_variant |
| rs1794744165 | intron_variant |
| rs1794744343 | intron_variant |
| rs1794745141 | intron_variant |
| rs1794745831 | intron_variant |
| rs1794746114 | intron_variant |
| rs1794746358 | intron_variant |
| rs1794746738 | intron_variant |
| rs1794747757 | intron_variant |
| rs1794747900 | intron_variant |
| rs1794748073 | intron_variant |
| rs1794748394 | intron_variant |
| rs1794750104 | intron_variant |
| rs1794750557 | intron_variant |
| rs1794750845 | intron_variant |
| rs1794750981 | intron_variant |
| rs1794751529 | intron_variant |
| rs1794751796 | intron_variant |
| rs1794752240 | intron_variant |
| rs1794752351 | intron_variant |
| rs1794752470 | intron_variant |
| rs1794752714 | intron_variant |
| rs1794752853 | intron_variant |























































































































































































|              |                                                                                                   |
|--------------|---------------------------------------------------------------------------------------------------|
| rs10279782   | intron_variant                                                                                    |
| rs10487353   | genic_upstream_transcript_variant,intron_variant                                                  |
| rs10674901   | intron_variant                                                                                    |
| rs10674901   | intron_variant                                                                                    |
| rs10674901   | intron_variant                                                                                    |
| rs10674901   | intron_variant                                                                                    |
| rs10674901   | intron_variant                                                                                    |
| rs10674901   | intron_variant                                                                                    |
| rs10674901   | intron_variant                                                                                    |
| rs60728121   | intron_variant                                                                                    |
| rs375694180  | intron_variant                                                                                    |
| rs139335533  | intron_variant                                                                                    |
| rs1491263538 | genic_upstream_transcript_variant,intron_variant                                                  |
| rs398005977  | genic_upstream_transcript_variant,intron_variant                                                  |
| rs397726974  | genic_upstream_transcript_variant,intron_variant                                                  |
| rs71148328   | genic_upstream_transcript_variant,intron_variant                                                  |
| rs1251370061 | genic_downstream_transcript_variant,intron_variant                                                |
| rs14992616   | genic_downstream_transcript_variant,intron_variant                                                |
| rs145607365  | genic_downstream_transcript_variant,intron_variant                                                |
| rs34757041   | genic_downstream_transcript_variant,intron_variant                                                |
| rs34756179   | genic_downstream_transcript_variant,intron_variant                                                |
| rs56530581   | intron_variant,genic_upstream_transcript_variant                                                  |
| rs56494314   | intron_variant,genic_upstream_transcript_variant                                                  |
| rs52803357   | intron_variant,genic_upstream_transcript_variant                                                  |
| rs61574521   | intron_variant,genic_upstream_transcript_variant                                                  |
| rs60635852   | intron_variant                                                                                    |
| rs60230670   | intron_variant,genic_downstream_transcript_variant                                                |
| rs61168850   | intron_variant                                                                                    |
| rs57391921   | intron_variant                                                                                    |
| rs1487033029 | intron_variant                                                                                    |
| rs1283035003 | intron_variant                                                                                    |
| rs397702650  | intron_variant                                                                                    |
| rs67225621   | intron_variant                                                                                    |
| rs796631372  | intron_variant                                                                                    |
| rs67063134   | intron_variant                                                                                    |
| rs36012692   | intron_variant                                                                                    |
| rs1437231732 | 2KB_upstream_variant,genic_upstream_transcript_variant,upstream_transcript_variant,intron_variant |
| rs1371410510 | 2KB_upstream_variant,genic_upstream_transcript_variant,upstream_transcript_variant,intron_variant |
| rs889249901  | 2KB_upstream_variant,genic_upstream_transcript_variant,upstream_transcript_variant,intron_variant |
| rs869176357  | 2KB_upstream_variant,genic_upstream_transcript_variant,upstream_transcript_variant,intron_variant |
| rs397897310  | 2KB_upstream_variant,genic_upstream_transcript_variant,upstream_transcript_variant,intron_variant |
| rs368522661  | 2KB_upstream_variant,genic_upstream_transcript_variant,upstream_transcript_variant,intron_variant |
| rs112424327  | 2KB_upstream_variant,genic_upstream_transcript_variant,upstream_transcript_variant,intron_variant |
| rs36222678   | 2KB_upstream_variant,genic_upstream_transcript_variant,upstream_transcript_variant,intron_variant |
| rs150357421  | intron_variant,genic_upstream_transcript_variant                                                  |
| rs62470764   | intron_variant,genic_downstream_transcript_variant                                                |
| rs1491058896 | intron_variant,genic_upstream_transcript_variant                                                  |
| rs1467890336 | intron_variant,genic_upstream_transcript_variant                                                  |
| rs1258091127 | intron_variant,genic_upstream_transcript_variant                                                  |
| rs1174825885 | intron_variant,genic_upstream_transcript_variant                                                  |
| rs60570682   | intron_variant,genic_upstream_transcript_variant                                                  |
| rs150308728  | intron_variant,genic_upstream_transcript_variant                                                  |
| rs1491052470 | intron_variant                                                                                    |
| rs796499649  | intron_variant                                                                                    |
| rs765700347  | intron_variant                                                                                    |
| rs372923004  | intron_variant                                                                                    |
| rs146796918  | intron_variant                                                                                    |
| rs72318699   | intron_variant                                                                                    |
| rs1491296805 | intron_variant                                                                                    |
| rs1445950074 | intron_variant                                                                                    |
| rs1342380574 | intron_variant                                                                                    |
| rs1306508011 | intron_variant                                                                                    |
| rs1284068744 | intron_variant                                                                                    |
| rs1256638755 | intron_variant                                                                                    |
| rs1220779340 | intron_variant                                                                                    |
| rs56211062   | intron_variant                                                                                    |
| rs553425769  | intron_variant                                                                                    |
| rs1476413470 | intron_variant,genic_downstream_transcript_variant                                                |
| rs1469062989 | intron_variant,genic_downstream_transcript_variant                                                |
| rs1441378861 | intron_variant,genic_downstream_transcript_variant                                                |
| rs1414970085 | intron_variant,genic_downstream_transcript_variant                                                |
| rs1393305754 | intron_variant,genic_downstream_transcript_variant                                                |
| rs1321921983 | intron_variant,genic_downstream_transcript_variant                                                |
| rs1284780498 | intron_variant,genic_downstream_transcript_variant                                                |

|              |                                                                                                   |
|--------------|---------------------------------------------------------------------------------------------------|
| rs1215833845 | intron_variant,genic_downstream_transcript_variant                                                |
| rs1177190697 | intron_variant,genic_downstream_transcript_variant                                                |
| rs1162319701 | intron_variant,genic_downstream_transcript_variant                                                |
| rs773395948  | intron_variant,genic_downstream_transcript_variant                                                |
| rs757359883  | intron_variant,genic_downstream_transcript_variant                                                |
| rs67413931   | intron_variant,genic_downstream_transcript_variant                                                |
| rs62470765   | intron_variant,genic_downstream_transcript_variant                                                |
| rs397974831  | intron_variant                                                                                    |
| rs367847186  | intron_variant                                                                                    |
| rs148286670  | intron_variant                                                                                    |
| rs373660761  | intron_variant                                                                                    |
| rs759615935  | intron_variant,genic_upstream_transcript_variant                                                  |
| rs149077312  | intron_variant,genic_upstream_transcript_variant                                                  |
| rs67054197   | intron_variant,genic_upstream_transcript_variant                                                  |
| rs62469055   | intron_variant,genic_upstream_transcript_variant,upstream_transcript_variant,2KB_upstream_variant |
| rs397820061  | intron_variant                                                                                    |
| rs148173983  | intron_variant                                                                                    |
| rs67670327   | intron_variant                                                                                    |
| rs1474664678 | intron_variant,genic_upstream_transcript_variant                                                  |
| rs1430338794 | intron_variant,genic_upstream_transcript_variant                                                  |
| rs796979618  | intron_variant,genic_upstream_transcript_variant                                                  |
| rs376932004  | intron_variant,genic_upstream_transcript_variant                                                  |
| rs71780538   | intron_variant,genic_upstream_transcript_variant                                                  |
| rs1158336212 | intron_variant                                                                                    |
| rs146007827  | intron_variant                                                                                    |
| rs1276223352 | intron_variant                                                                                    |
| rs386467303  | intron_variant                                                                                    |
| rs66625749   | intron_variant,genic_upstream_transcript_variant                                                  |
| rs386493874  | intron_variant,genic_upstream_transcript_variant                                                  |
| rs140282074  | intron_variant,genic_upstream_transcript_variant,upstream_transcript_variant,2KB_upstream_variant |
| rs66712868   | intron_variant,genic_upstream_transcript_variant,upstream_transcript_variant,2KB_upstream_variant |
| rs66712867   | intron_variant,genic_upstream_transcript_variant,upstream_transcript_variant,2KB_upstream_variant |
| rs367840178  | intron_variant                                                                                    |
| rs66849349   | intron_variant                                                                                    |
| rs139235163  | intron_variant,genic_downstream_transcript_variant                                                |
| rs66907203   | intron_variant,genic_downstream_transcript_variant                                                |
| rs66904902   | intron_variant,genic_downstream_transcript_variant                                                |
| rs137935225  | intron_variant,genic_upstream_transcript_variant                                                  |
| rs66908767   | intron_variant,genic_upstream_transcript_variant                                                  |
| rs66908766   | intron_variant,genic_upstream_transcript_variant                                                  |
| rs66908765   | intron_variant,genic_upstream_transcript_variant                                                  |
| rs66908764   | intron_variant,genic_upstream_transcript_variant                                                  |
| rs66908763   | intron_variant,genic_upstream_transcript_variant                                                  |
| rs66908762   | intron_variant,genic_upstream_transcript_variant                                                  |
| rs66908761   | intron_variant,genic_upstream_transcript_variant                                                  |
| rs1401817436 | intron_variant                                                                                    |
| rs775236929  | intron_variant                                                                                    |
| rs566782532  | intron_variant                                                                                    |
| rs376637658  | intron_variant                                                                                    |
| rs373134711  | intron_variant                                                                                    |
| rs146754820  | intron_variant                                                                                    |
| rs66996051   | intron_variant                                                                                    |
| rs67297108   | intron_variant                                                                                    |
| rs67297107   | intron_variant                                                                                    |
| rs1491494569 | intron_variant                                                                                    |
| rs1392929067 | intron_variant                                                                                    |
| rs1327962790 | intron_variant                                                                                    |
| rs73716768   | intron_variant,genic_downstream_transcript_variant                                                |
| rs368105843  | intron_variant                                                                                    |
| rs116390080  | intron_variant                                                                                    |
| rs112842464  | intron_variant                                                                                    |
| rs118074096  | intron_variant,downstream_transcript_variant,genic_downstream_transcript_variant                  |
| rs386435000  | intron_variant,genic_upstream_transcript_variant                                                  |
| rs372598144  | genic_downstream_transcript_variant,intron_variant                                                |
| rs1160458462 | intron_variant,genic_upstream_transcript_variant                                                  |
| rs879871325  | intron_variant,genic_upstream_transcript_variant                                                  |
| rs376254940  | intron_variant,genic_upstream_transcript_variant                                                  |
| rs1445045860 | intron_variant,genic_upstream_transcript_variant                                                  |
| rs1404826611 | intron_variant,genic_upstream_transcript_variant                                                  |
| rs1403002235 | intron_variant,genic_upstream_transcript_variant                                                  |
| rs1388731990 | intron_variant,genic_upstream_transcript_variant                                                  |
| rs1336590190 | intron_variant,genic_upstream_transcript_variant                                                  |
| rs1330226872 | intron_variant,genic_upstream_transcript_variant                                                  |
| rs1165191012 | intron_variant,genic_upstream_transcript_variant                                                  |

|              |                                                                                                   |
|--------------|---------------------------------------------------------------------------------------------------|
| rs369614565  | intron_variant,genic_upstream_transcript_variant                                                  |
| rs527395917  | intron_variant,genic_upstream_transcript_variant                                                  |
| rs368246294  | intron_variant,genic_upstream_transcript_variant                                                  |
| rs778952866  | intron_variant                                                                                    |
| rs560457746  | intron_variant                                                                                    |
| rs377384694  | intron_variant                                                                                    |
| rs765849621  | intron_variant                                                                                    |
| rs1254058248 | intron_variant                                                                                    |
| rs753014425  | intron_variant,genic_upstream_transcript_variant                                                  |
| rs747715532  | intron_variant,genic_upstream_transcript_variant                                                  |
| rs536870496  | intron_variant,genic_upstream_transcript_variant                                                  |
| rs367766330  | intron_variant,genic_upstream_transcript_variant                                                  |
| rs1491577926 | intron_variant,genic_upstream_transcript_variant                                                  |
| rs1483576249 | intron_variant,genic_upstream_transcript_variant                                                  |
| rs982830381  | intron_variant                                                                                    |
| rs1415785967 | intron_variant                                                                                    |
| rs796853155  | intron_variant                                                                                    |
| rs554481521  | intron_variant                                                                                    |
| rs375084330  | intron_variant                                                                                    |
| rs1476851288 | upstream_transcript_variant,genic_upstream_transcript_variant,intron_variant,2KB_upstream_variant |
| rs530064072  | intron_variant,genic_upstream_transcript_variant                                                  |
| rs891590876  | intron_variant                                                                                    |
| rs574203259  | intron_variant,genic_upstream_transcript_variant                                                  |
| rs564884564  | genic_downstream_transcript_variant,intron_variant                                                |
| rs539133481  | intron_variant,genic_upstream_transcript_variant                                                  |
| rs557854595  | intron_variant                                                                                    |
| rs556754721  | intron_variant                                                                                    |
| rs555448301  | intron_variant                                                                                    |
| rs375583910  | intron_variant                                                                                    |
| rs1405595391 | intron_variant                                                                                    |
| rs546780063  | genic_downstream_transcript_variant,intron_variant                                                |
| rs1237807623 | intron_variant,genic_upstream_transcript_variant                                                  |
| rs532372468  | intron_variant                                                                                    |
| rs563904002  | intron_variant                                                                                    |
| rs375900077  | intron_variant                                                                                    |
| rs1270420095 | intron_variant                                                                                    |
| rs929506599  | intron_variant                                                                                    |
| rs779562192  | intron_variant,genic_upstream_transcript_variant                                                  |
| rs1251699262 | genic_downstream_transcript_variant,intron_variant                                                |
| rs1176384808 | genic_downstream_transcript_variant,intron_variant                                                |
| rs955405496  | genic_downstream_transcript_variant,intron_variant                                                |
| rs1180390677 | genic_downstream_transcript_variant,intron_variant                                                |
| rs762702546  | genic_downstream_transcript_variant,intron_variant                                                |
| rs751660412  | genic_downstream_transcript_variant,intron_variant                                                |
| rs1291154390 | genic_downstream_transcript_variant,intron_variant                                                |
| rs559296135  | genic_downstream_transcript_variant,intron_variant                                                |
| rs1260106143 | intron_variant,genic_upstream_transcript_variant                                                  |
| rs1001530884 | intron_variant,genic_upstream_transcript_variant                                                  |
| rs1479875163 | intron_variant,genic_upstream_transcript_variant                                                  |
| rs1424719466 | intron_variant,genic_upstream_transcript_variant                                                  |
| rs1331878635 | intron_variant,genic_upstream_transcript_variant                                                  |
| rs1284157953 | intron_variant,genic_upstream_transcript_variant                                                  |
| rs1268774060 | intron_variant,genic_upstream_transcript_variant                                                  |
| rs1260185170 | intron_variant,genic_upstream_transcript_variant                                                  |
| rs1222997092 | intron_variant,genic_upstream_transcript_variant                                                  |
| rs1203854088 | intron_variant,genic_upstream_transcript_variant                                                  |
| rs779814452  | intron_variant,genic_upstream_transcript_variant                                                  |
| rs1236934214 | intron_variant,genic_upstream_transcript_variant                                                  |
| rs758446144  | intron_variant,genic_upstream_transcript_variant                                                  |
| rs1434417107 | upstream_transcript_variant,2KB_upstream_variant,intron_variant,genic_upstream_transcript_variant |
| rs1393611408 | upstream_transcript_variant,2KB_upstream_variant,intron_variant,genic_upstream_transcript_variant |
| rs1376654538 | upstream_transcript_variant,2KB_upstream_variant,intron_variant,genic_upstream_transcript_variant |
| rs1374776150 | upstream_transcript_variant,2KB_upstream_variant,intron_variant,genic_upstream_transcript_variant |
| rs1367643446 | upstream_transcript_variant,2KB_upstream_variant,intron_variant,genic_upstream_transcript_variant |
| rs1319493506 | upstream_transcript_variant,2KB_upstream_variant,intron_variant,genic_upstream_transcript_variant |
| rs1293497134 | upstream_transcript_variant,2KB_upstream_variant,intron_variant,genic_upstream_transcript_variant |
| rs1292999586 | upstream_transcript_variant,2KB_upstream_variant,intron_variant,genic_upstream_transcript_variant |
| rs1247121839 | upstream_transcript_variant,2KB_upstream_variant,intron_variant,genic_upstream_transcript_variant |
| rs1237445909 | upstream_transcript_variant,2KB_upstream_variant,intron_variant,genic_upstream_transcript_variant |
| rs869038513  | upstream_transcript_variant,2KB_upstream_variant,intron_variant,genic_upstream_transcript_variant |
| rs1419588982 | intron_variant                                                                                    |
| rs969342789  | intron_variant,genic_downstream_transcript_variant                                                |
| rs1483681734 | intron_variant                                                                                    |
| rs1469304512 | intron_variant                                                                                    |

|              |                                                                                                   |
|--------------|---------------------------------------------------------------------------------------------------|
| rs1415523677 | intron_variant                                                                                    |
| rs1250115564 | intron_variant                                                                                    |
| rs1187893867 | intron_variant                                                                                    |
| rs1184757751 | intron_variant                                                                                    |
| rs759688352  | intron_variant                                                                                    |
| rs1028222407 | intron_variant,genic_downstream_transcript_variant                                                |
| rs997205090  | intron_variant,genic_downstream_transcript_variant                                                |
| rs1219982298 | genic_upstream_transcript_variant,intron_variant                                                  |
| rs747147150  | genic_upstream_transcript_variant,intron_variant                                                  |
| rs1476725551 | genic_downstream_transcript_variant,intron_variant                                                |
| rs1379054262 | genic_downstream_transcript_variant,intron_variant                                                |
| rs1489276384 | genic_upstream_transcript_variant,intron_variant                                                  |
| rs1357351645 | intron_variant                                                                                    |
| rs1272360083 | intron_variant                                                                                    |
| rs1362478455 | intron_variant                                                                                    |
| rs776965898  | intron_variant                                                                                    |
| rs1443751716 | genic_upstream_transcript_variant,intron_variant                                                  |
| rs1423111949 | genic_upstream_transcript_variant,intron_variant                                                  |
| rs1396483354 | genic_upstream_transcript_variant,intron_variant                                                  |
| rs1387418033 | genic_upstream_transcript_variant,intron_variant                                                  |
| rs1372560806 | genic_upstream_transcript_variant,intron_variant                                                  |
| rs1357061293 | genic_upstream_transcript_variant,intron_variant                                                  |
| rs1317046138 | genic_upstream_transcript_variant,intron_variant                                                  |
| rs1308241827 | genic_upstream_transcript_variant,intron_variant                                                  |
| rs1302195996 | genic_upstream_transcript_variant,intron_variant                                                  |
| rs1295876989 | genic_upstream_transcript_variant,intron_variant                                                  |
| rs1291389343 | genic_upstream_transcript_variant,intron_variant                                                  |
| rs1218207781 | genic_upstream_transcript_variant,intron_variant                                                  |
| rs1164648918 | genic_upstream_transcript_variant,intron_variant                                                  |
| rs869245146  | genic_upstream_transcript_variant,intron_variant                                                  |
| rs776764808  | genic_upstream_transcript_variant,intron_variant                                                  |
| rs767255754  | genic_upstream_transcript_variant,intron_variant                                                  |
| rs1397878507 | genic_downstream_transcript_variant,intron_variant                                                |
| rs1414615536 | genic_upstream_transcript_variant,intron_variant                                                  |
| rs1403208144 | genic_upstream_transcript_variant,intron_variant                                                  |
| rs779923249  | genic_upstream_transcript_variant,intron_variant                                                  |
| rs1477521205 | intron_variant                                                                                    |
| rs1376614750 | upstream_transcript_variant,genic_upstream_transcript_variant,intron_variant                      |
| rs1350940512 | intron_variant                                                                                    |
| rs1281420884 | intron_variant                                                                                    |
| rs1005267440 | intron_variant                                                                                    |
| rs1263984001 | genic_upstream_transcript_variant,intron_variant,upstream_transcript_variant,2KB_upstream_variant |
| rs1239485971 | genic_upstream_transcript_variant,intron_variant,upstream_transcript_variant,2KB_upstream_variant |
| rs781100494  | intron_variant                                                                                    |
| rs758508055  | intron_variant                                                                                    |
| rs1477104941 | intron_variant,genic_upstream_transcript_variant                                                  |
| rs1467887598 | intron_variant,genic_upstream_transcript_variant                                                  |
| rs1378624161 | intron_variant,genic_upstream_transcript_variant                                                  |
| rs1193060790 | intron_variant,genic_upstream_transcript_variant                                                  |
| rs1454142689 | intron_variant                                                                                    |
| rs1380587769 | intron_variant                                                                                    |
| rs1364431125 | intron_variant                                                                                    |
| rs1289595028 | intron_variant                                                                                    |
| rs796323792  | intron_variant                                                                                    |
| rs1297779902 | intron_variant                                                                                    |
| rs1262992194 | intron_variant                                                                                    |
| rs897900498  | genic_upstream_transcript_variant,intron_variant                                                  |
| rs879340516  | genic_upstream_transcript_variant,intron_variant                                                  |
| rs773943998  | genic_upstream_transcript_variant,intron_variant                                                  |
| rs1218946223 | intron_variant                                                                                    |
| rs774060523  | intron_variant                                                                                    |
| rs767196610  | intron_variant                                                                                    |
| rs1486100144 | intron_variant                                                                                    |
| rs869213398  | intron_variant                                                                                    |
| rs1454614693 | genic_upstream_transcript_variant,intron_variant                                                  |
| rs1450723281 | intron_variant                                                                                    |
| rs1440305574 | intron_variant                                                                                    |
| rs770913210  | intron_variant                                                                                    |
| rs1300327003 | intron_variant                                                                                    |
| rs1291061466 | intron_variant                                                                                    |
| rs775107525  | intron_variant                                                                                    |
| rs774612760  | intron_variant                                                                                    |
| rs1438226662 | upstream_transcript_variant,intron_variant,2KB_upstream_variant,genic_upstream_transcript_variant |
| rs1364293794 | intron_variant,genic_upstream_transcript_variant                                                  |

|              |                                                                                                   |
|--------------|---------------------------------------------------------------------------------------------------|
| rs1305305708 | intron_variant,genic_upstream_transcript_variant                                                  |
| rs1234778638 | intron_variant,genic_upstream_transcript_variant                                                  |
| rs1035121935 | intron_variant                                                                                    |
| rs1030391504 | intron_variant                                                                                    |
| rs1277751279 | intron_variant                                                                                    |
| rs1428375631 | intron_variant                                                                                    |
| rs1053959932 | genic_upstream_transcript_variant,intron_variant                                                  |
| rs1220990250 | intron_variant                                                                                    |
| rs1471917133 | intron_variant                                                                                    |
| rs1298367602 | genic_downstream_transcript_variant,intron_variant                                                |
| rs1162110960 | genic_downstream_transcript_variant,intron_variant                                                |
| rs1454527158 | genic_upstream_transcript_variant,intron_variant                                                  |
| rs1431930868 | intron_variant                                                                                    |
| rs1173997370 | intron_variant,genic_downstream_transcript_variant                                                |
| rs1446226785 | genic_downstream_transcript_variant,intron_variant                                                |
| rs1371091186 | genic_upstream_transcript_variant,intron_variant                                                  |
| rs1026058071 | genic_upstream_transcript_variant,intron_variant                                                  |
| rs1383653178 | 2KB_upstream_variant,genic_upstream_transcript_variant,upstream_transcript_variant,intron_variant |
| rs1319250184 | intron_variant,genic_upstream_transcript_variant                                                  |
| rs1260104145 | intron_variant,genic_upstream_transcript_variant                                                  |
| rs1439323260 | intron_variant,genic_upstream_transcript_variant                                                  |
| rs1176732281 | intron_variant                                                                                    |
| rs1222148712 | genic_upstream_transcript_variant,intron_variant                                                  |
| rs1347850984 | genic_upstream_transcript_variant,intron_variant                                                  |
| rs1290575282 | intron_variant                                                                                    |
| rs1473698764 | intron_variant,genic_upstream_transcript_variant                                                  |
| rs1352094674 | intron_variant,genic_upstream_transcript_variant                                                  |
| rs1474626406 | intron_variant,genic_upstream_transcript_variant                                                  |
| rs1239319469 | intron_variant,genic_upstream_transcript_variant                                                  |
| rs1423900181 | intron_variant,genic_downstream_transcript_variant                                                |
| rs1390290820 | intron_variant                                                                                    |
| rs1473009240 | genic_upstream_transcript_variant,intron_variant                                                  |
| rs1405835625 | genic_upstream_transcript_variant,intron_variant                                                  |
| rs1348283443 | intron_variant                                                                                    |
| rs1343460709 | intron_variant                                                                                    |
| rs1491167146 | genic_upstream_transcript_variant,intron_variant                                                  |
| rs1271232546 | genic_upstream_transcript_variant,intron_variant                                                  |
| rs1241475594 | intron_variant                                                                                    |
| rs1433784914 | genic_upstream_transcript_variant,intron_variant                                                  |
| rs1409683062 | intron_variant,genic_upstream_transcript_variant                                                  |
| rs1482862733 | intron_variant                                                                                    |
| rs1429447831 | genic_upstream_transcript_variant,intron_variant                                                  |
| rs1313274502 | intron_variant,genic_upstream_transcript_variant                                                  |
| rs1282557906 | intron_variant                                                                                    |
| rs1281618684 | genic_downstream_transcript_variant,intron_variant                                                |
| rs1483523706 | intron_variant,genic_upstream_transcript_variant                                                  |
| rs1443167352 | intron_variant                                                                                    |
| rs1486388740 | intron_variant                                                                                    |
| rs1445283858 | intron_variant,genic_upstream_transcript_variant                                                  |
| rs1411671350 | genic_upstream_transcript_variant,intron_variant                                                  |
| rs1456775137 | genic_upstream_transcript_variant,intron_variant                                                  |
| rs1408600334 | intron_variant                                                                                    |
| rs1429133598 | intron_variant,genic_upstream_transcript_variant                                                  |
| rs1425169536 | intron_variant                                                                                    |
| rs1407411602 | intron_variant,genic_upstream_transcript_variant                                                  |
| rs1431986972 | intron_variant,genic_upstream_transcript_variant                                                  |
| rs1353555511 | intron_variant,genic_upstream_transcript_variant                                                  |
| rs1358885005 | intron_variant,genic_upstream_transcript_variant                                                  |
| rs1405900321 | intron_variant                                                                                    |
| rs1485525415 | intron_variant                                                                                    |
| rs1491365122 | intron_variant                                                                                    |
| rs1437620582 | intron_variant                                                                                    |
| rs1411779972 | intron_variant,genic_upstream_transcript_variant                                                  |
| rs1474273915 | intron_variant                                                                                    |
| rs1454618665 | intron_variant,genic_upstream_transcript_variant                                                  |
| rs1491147401 | intron_variant                                                                                    |
| rs1436894873 | genic_upstream_transcript_variant,intron_variant                                                  |
| rs1491184620 | intron_variant                                                                                    |
| rs1491326782 | intron_variant                                                                                    |
| rs753080687  | genic_upstream_transcript_variant,intron_variant                                                  |
| rs1360262192 | intron_variant                                                                                    |
| rs1162329827 | intron_variant                                                                                    |
